# Supplementary material for: Transcriptome Analysis of the Human Tibial Nerve Identifies Sexually Dimorphic Expression of Genes Involved in Pain, Inflammation, and Neuro-Immunity
Source: Front Mol Neurosci. 2019 Mar 5;12:37. doi: 10.3389/fnmol.2019.00037 (PMC6412153; doi:10.3389/fnmol.2019.00037)
Supplement: Supplementary file 1 [file Table_1.XLSX]

## Sheet: supp_table_1
Supplementary Table 1. Male and female hTN sample gene expression values in TPM (in male and female BSL subcohorts)
			Female -->
gene_#	ensembl_id	gene_name	F1	F2	F3	F4	F5	F6	F7	F8	F9	F10	F11	F12	F13	F14	F15	F16	F17	F18	F19	F20	F21	F22	F23	F24	F25	F26	F27	F28	F29	F30	F31	F32	F33	F34	F35	F36	F37	F38	F39	F40	F41	F42	F43	F44	F45	F46	F47
1	ENSG00000121410.7	<A1BG>	61.44	84.15	81.69	46.5	76.02	47.54	72.6	72.29	58.11	69.37	70.33	56	92.58	87.02	82.3	69.62	74.51	70.71	94.17	88.9	40.01	63.35	58.13	64.11	69.68	105.58	119.73	67.39	80.83	52.55	54.34	89.9	86.39	98.78	40.1	66.41	46.3	71.62	52.1	106.4	60.38	88.36	67.66	96.05	75.92	69.55	54.69
2	ENSG00000148584.10	<A1CF>	0.02	0	0	0.05	0	0.02	0	0.06	0	0	0	0.02	0	0.02	0	0	0	0.02	0.02	0.02	0	0.04	0	0.02	0.14	0	0.02	0.02	0.02	0	0	0	0	0.17	0	0.18	0	0.05	0	0	0.02	0	0.05	0.04	0	0	0.02
3	ENSG00000175899.10	<A2M>	189.08	221	356.19	510.94	255.23	384.05	276.14	401.34	313.53	327.37	368.23	228.93	325.71	164.91	220.72	434.23	283.75	186.76	226.49	170.73	414.36	265.94	317.66	315.19	258.8	290.14	292.11	331.82	403.3	225.18	383.11	332.97	230.78	226.15	317.59	257.54	230.86	673.96	216.7	270.17	386.3	309.11	248.19	206.78	219.71	333.77	264.09
4	ENSG00000166535.15	<A2ML1>	33.32	5.02	5.29	8.52	16.14	4.35	7.29	2.5	5.05	19.56	4.34	11.26	18.09	9.63	11.46	6.2	13.77	10.61	21.22	13.32	5.08	4.28	24.2	12.95	13.37	16.22	12.01	5.61	3.62	19.33	0.62	11.67	7.34	18.16	9.69	7.22	8.15	7.2	6.21	13.8	15.44	6.01	6.9	10.14	19.2	8.17	5.53
5	ENSG00000184389.8	<A3GALT2>	0.56	0.23	0	0.22	0.32	0	0	0.13	0.11	0	0.76	0	0	0	0	0	0	0	0.16	0	0.29	0	0	0.2	0	0.15	0	0	0	0	0	0	0.27	0	0	0.09	0	0.17	0.17	0.58	0	0.14	0	0.35	0.34	0.83	0
6	ENSG00000128274.11	<A4GALT>	18.49	47.33	23.86	22.47	20.45	15.11	13.58	37.7	37	21.5	38.01	14.47	17.62	9.12	26.84	15.62	20.37	39.64	29.1	23.86	28.85	12.59	7.07	27.88	24.74	26.1	26.96	19.34	27.95	20.02	24	14.99	12.59	22.63	29.8	23.3	32.7	12.06	43.85	27.64	28.15	18.63	26.47	25.88	57.73	36.16	24.78
7	ENSG00000118017.3	<A4GNT>	0	0	0	0	0	0	0	0	0	0	0	0	0	0	0	0	0	0	0	0	0	0	0	0	0	0	0	0	0	0	0	0	0	0	0	0	0	0	0	0	0	0	0	0	0	0	0
8	ENSG00000094914.8	<AAAS>	114.88	88.01	127.22	84.99	78.01	119.44	96.54	88.79	129.2	106.77	100.37	138.78	108.4	119.92	95.22	57.45	117.77	86.06	86.91	135.61	90.99	87.58	97.82	103.36	102.53	96.85	120.01	120.97	125.46	99.53	58.23	83	88.08	161.84	131.13	94.4	120.79	155.06	52.67	98.26	162.31	179.04	113.42	96.04	101.11	68.77	90.5
9	ENSG00000081760.12	<AACS>	21.82	42.38	21.13	26.45	23.75	27.67	20.75	24.97	23.32	18.08	30.9	15.99	13.87	28.59	20.72	17.22	22.1	26.32	20.51	17.23	60.18	38.1	26.47	33.39	24.09	23.86	18.67	22.32	17.8	23.79	28.78	23.46	20.73	30.51	15.18	21.32	18.91	18.77	23.49	29.91	24.35	18.16	24.17	20.67	17.44	27.97	26.74
10	ENSG00000114771.9	<AADAC>	0	0	0	0	0.25	0	0	0	0	0	0	0.04	0	0.5	0	0	0	0	0	0	0	0	0.14	0.51	0	0	0	0	0	0	0	0	0	0.16	0	0	0.1	0	0.13	0	0	0	0	0	0.28	0.33	0
11	ENSG00000197953.5	<AADACL2>	0	0	0	0	0	0	0	0.02	0.02	0	0.02	0	0.02	0	0	0	0.02	0	0	0	0.04	0	0	0	0	0	0	0	0	0	0	0	0	0	0	0.04	0.09	0	0	0	0.12	0	0.14	0	0	0	0.09
12	ENSG00000188984.7	<AADACL3>	0	0	0.07	0	0	0	0	0	0	0	0	0	0	0	0	0	0	0	0	0	0	0	0	0	0	0	0	0	0	0	0	0	0	0	0	0	0	0	0	0	0	0	0	0	0	0	0
13	ENSG00000204518.2	<AADACL4>	0	0	0	0	0	0	0	0	0	0	0	0	0	0	0	0	0	0	0	0	0	0	0	0	0	0	0	0	0	0	0	0	0	0	0	0	0	0	0	0	0	0	0	0	0	0	0
14	ENSG00000109576.9	<AADAT>	10.77	6.43	5.9	5.9	8.78	4.27	7.33	5.38	7.44	6.89	5.37	9.91	8.42	5.08	6.88	2.7	4.44	3.85	10.62	11.7	5.1	2.94	9.63	2.81	5.51	4.62	5.99	6.54	9.08	5.91	4.74	2.53	1.19	13.75	12.36	6.6	8.78	6.1	2.54	5.53	16.67	20.88	5.82	4.44	5.73	6.53	3.81
15	ENSG00000158122.7	<AAED1>	7.74	13.61	8.09	16.18	16.85	16.63	14.19	13.37	16.25	8.78	11.4	12.25	10.65	15.39	8.54	14.07	13.15	16.29	9.35	5.1	14.92	17.35	12.33	16.78	13.15	10.46	9.96	11.78	9.53	11.49	10.43	14.47	13.45	8.95	8.51	11.61	17.78	8.73	9.88	15.55	12.9	5.1	6.76	16.76	18.17	18.1	13.38
16	ENSG00000103591.8	<AAGAB>	18.58	26.84	15.26	20.63	16.07	18.05	10.86	18.22	19.4	19.92	23.38	17.21	14.08	17.8	18.43	22.17	16.56	20.01	18.04	16.91	31.18	10.03	14.46	22.05	12.34	24.81	13.89	13.53	15.97	25.19	29.57	21.62	13.03	17.88	16.14	13.54	17.27	24.38	16.19	20.35	20.23	12.86	21.75	19.1	18.81	19.37	19.54
17	ENSG00000115977.14	<AAK1>	9.68	4.7	5.71	6.39	5.21	5.39	5.66	4.13	4.26	6.39	5.86	7.93	4.56	6.95	5.09	4.65	4.4	5.47	6.84	6.83	2.59	5.54	3.84	6.09	4.45	3.65	9.41	6.49	5.29	7.13	2.44	5.86	5.91	7.45	9.54	5.31	7.52	4.13	7.17	7.01	7.24	5.87	6.92	4.96	11.31	6.64	8.69
18	ENSG00000087884.10	<AAMDC>	129.55	103.85	144.99	140.33	67.35	164.36	146.27	111.11	159.03	153.17	103.28	147.39	150.65	136.78	126.27	96.07	166.79	170.85	138.04	140.35	154.72	114.34	131.28	157.1	141.88	137.47	117.78	163.15	155.49	159.15	79.9	156.31	109.73	142.13	106.09	150.05	161	198.03	189.74	146.89	137.15	142.14	98.8	137.76	135.39	140.83	110.18
19	ENSG00000127837.5	<AAMP>	91.09	77.09	89.27	153.39	115.82	101.66	84.7	113.43	112.47	116	132.89	72.98	112.75	79.46	120.01	100.19	93.71	115.68	82.79	104.06	106.93	147.6	113.3	136.51	127.25	61.28	83.23	90.14	92.74	105.36	94.81	85.97	126.89	105.62	85.81	101.27	107.45	115.65	105.54	88.72	93.95	61.05	114.06	95.48	114.95	110.68	87.02
20	ENSG00000129673.5	<AANAT>	0.36	0	0.25	1.16	0	0	0	0.24	0.32	0.47	0.56	0.46	0	0.61	0.83	0	0.18	0	0	0.45	0.15	0.11	0.3	0.45	0.25	0	0.28	0.16	0	0	0.34	0	0.27	0.29	0.15	0.25	0.82	0.82	0.74	1.74	0.41	0.65	0	0.02	0.37	0	0
21	ENSG00000131043.7	<AAR2>	4.2	3.47	4.08	5.07	3.38	4.21	3.03	5.51	1.99	1.82	3.76	4.06	1.57	3.05	1.91	4.58	2.26	2.78	2.8	4.43	1.49	4.56	3.82	2.52	3.08	2.24	1.6	1.31	3.39	5.15	5.34	3.45	3.07	2.28	6.6	4.74	2.48	1.03	3.82	3.84	2.71	2.12	4.62	5.54	2.45	5.9	3.85
22	ENSG00000205002.3	<AARD>	0	0	0	0	0.62	0	0.09	0	0.07	0.63	0	0	0	0.15	0.41	0	0	0.26	0.38	0	0	0	0	0	0	0	0	0	0	0	0	0	0	0	0	0	0	0	0	0	0	0.31	0	0	0	0.5	0
23	ENSG00000090861.11	<AARS>	18.15	31.11	14.28	12.36	20.19	13.12	13.67	19.93	21.11	17.72	15.9	15.41	20.74	9.83	16.85	22.76	15.93	19.29	14.72	18.91	14.35	20.27	22.28	14.89	13.35	23.15	21.76	20.49	19.23	16.78	58.43	12.22	15.95	22.44	34.36	19.97	19.11	12.7	13.41	19.76	28.99	26.7	13.47	16.33	16.2	14.16	16.26
24	ENSG00000124608.4	<AARS2>	0	0	0.19	0	0	0.23	0.18	0.37	0.16	0	0	0.48	0.15	0.24	0.18	0	0	0.2	0.25	0	0	0.23	0	0.65	0.16	0	0.18	0.18	0.29	0	0.17	0.2	0	0	0	0	0.3	0	0.13	0	0.46	0.22	0	0	0	0	0
25	ENSG00000266967.2	<AARSD1>	105.31	115.73	122.27	125.11	125.86	97.13	114.69	108.89	123.18	115.14	132.49	104.8	113.17	82.34	124.59	146.73	113.93	113	120.85	103.16	133.72	125.18	120.83	117.76	108.08	103.78	122.62	117.56	117.25	114.66	154.88	116.81	108.64	118.84	117.28	99.8	98.77	116.33	106.37	119.15	119.05	116.2	115.26	105.44	123.74	108.5	119.71
26	ENSG00000157426.9	<AASDH>	9.88	11.76	9.98	4.29	13.92	3.26	7.78	9.68	12.42	6.06	9.37	11.19	13.7	15.8	6.98	7.85	3.97	6.98	10.96	16.92	11.31	10.08	9.7	10.48	12.36	18.56	12.47	10.97	13.72	6.22	10.99	11.72	9.09	12.25	21.78	10.92	13.75	10.61	9.02	8.85	11.18	12.79	5.89	8.49	11.13	7.95	8.65
27	ENSG00000149313.6	<AASDHPPT>	2.75	1.21	4.32	2.35	4.77	2.6	1.13	1.93	2.22	3.09	1.47	2.31	2.93	1.16	2.09	2.92	1.14	0.9	2	6.06	2.62	4.97	3.04	3.88	1.64	1.69	4.76	2.26	2.17	1.87	0.94	2.41	3.43	2.82	5.05	1.54	4.15	2.96	2.93	2.95	7.11	4.79	2.02	1.76	3.65	2.79	3.04
28	ENSG00000008311.10	<AASS>	101.61	191.06	70.45	436.03	118.29	57.13	57.81	238	81.32	140.54	316.55	69.43	126.85	176.71	143.57	253.99	202.29	365.15	348.65	97.56	298.46	208.78	188.5	280.59	196.19	62.27	113.77	71.5	66.86	229.86	41.37	145.03	312.55	213.3	69.74	55.25	99.44	71.88	146.71	246.39	87.13	63.86	74.87	219.6	275.51	275.98	252.99
29	ENSG00000108270.6	<AATF>	7.36	13.23	6.13	9.86	6.76	9.44	4.39	12.42	6.95	10.4	11.04	6.41	11.05	10.53	9.25	12.31	8.24	5.31	15.39	6.99	13.55	7.89	7.02	8.27	9.66	10.02	8.04	8.24	10.49	7.97	20.85	8.7	10.55	9.93	6.75	7.03	10.55	10.37	6.16	8.7	34.27	7.13	13.77	7.6	10.42	8.82	8.61
30	ENSG00000181409.7	<AATK>	1577.53	490.69	898.15	958.28	1926.44	781.14	1290.49	698.72	1227.61	1098.38	1265.18	1438.18	1076.25	1124.03	1650.4	832.57	1107.92	1192.52	1233.29	1801.52	315.39	1582.11	1406.06	799.58	1438.98	810.85	974.22	840.65	758.63	1180.22	391.29	1148.84	868.07	1337.59	1037.78	1106.82	756.86	970.62	809.36	1271.04	1195.87	846.96	852.72	874.6	900.37	1091.88	696.85
31	ENSG00000183044.7	<ABAT>	2.89	1.89	2.15	3.04	3.22	2.6	1.98	1.18	2.06	3.11	2.23	1.68	2.08	2.33	1.84	1.13	2.09	1.25	3.74	2.21	2.93	4.17	2.45	4.08	2.52	1.72	3.71	2.09	1.96	1.62	1.33	0.94	1.48	4.75	3.75	1.15	1.75	2.37	1.4	3.78	1.12	4.48	1.2	3.1	2.53	2.48	1.91
32	ENSG00000165029.11	<ABCA1>	40.79	35.86	27.32	22.09	43.23	26.65	23.72	48.54	35.91	43.45	29.97	60.33	48.65	55.83	26.54	47.24	43.97	24.09	28.64	62.81	29.4	47.7	43.44	35.75	37.28	34.67	30.17	25.16	30.82	41.17	38.65	19.17	45.34	69.25	106.06	24.19	50.46	28.07	23.99	38.46	76.33	75.55	43.89	42.93	46.03	28.89	73.33
33	ENSG00000154263.13	<ABCA10>	197.67	96.27	215.79	117.72	182.39	171.35	155.6	76.83	269.76	205.15	85.29	308.57	258.24	203.82	171.19	120.2	159.63	65.02	169.84	183.57	131.9	103.5	68.69	118.36	116.2	309.68	133.85	207.52	247.47	152.3	44.35	81.86	103.01	182.28	280.81	178.99	294.87	356.74	57.31	185.01	248.11	519.74	349.76	160.81	163.06	109.77	163.28
34	ENSG00000144452.10	<ABCA12>	0	0	0.05	0.02	0	0.04	0	0	0	0	0	0.04	0	0.02	0	0	0.04	0	0.04	0	0.02	0	0.09	0.05	0	0.04	0	1.02	0.04	0	0	0	0	0	0.02	0	0	0	0	0	0	0.02	0.02	0	0	0	0
35	ENSG00000179869.10	<ABCA13>	10.9	2.77	3.31	1.28	4.61	2.42	5.42	2.19	3.39	4.84	1.6	12.88	3.39	3.61	5.92	2.92	4.31	4	4.12	5	1.66	2.48	4.85	2.79	3.8	5.26	2.77	4.19	2.53	6.46	0.36	2.67	2.01	2.28	4.78	4.27	4.85	2.51	4.26	3.88	2.51	1	4.97	2.19	3.99	3.94	1.34
36	ENSG00000107331.12	<ABCA2>	991.87	394.64	663.25	706.48	1121.61	533.91	780.66	403.82	841.48	839.92	942.44	947.01	1050.3	1196.23	996.48	604	927.1	900.61	1050.39	1078.48	286.82	781.21	886.71	634.59	972.75	935.5	1040.34	666.59	584.07	837.38	168.55	872	753.57	1220.03	940.23	807.84	634.6	642.04	578.01	806.58	752.56	1023.36	702.36	790.54	925.19	745.34	524.52
37	ENSG00000167972.9	<ABCA3>	5.71	7.47	8.16	5.66	4.37	12.45	10.66	3.78	15.51	7.27	12.14	15	21.27	9.45	19.04	5.7	8.86	11.81	11.62	16.02	5.85	7.39	10.86	5.77	5.59	19.46	14.02	8.19	11.64	9.33	7.65	10.67	5.88	19.09	9.62	7.74	6.77	20.89	4.32	7.59	19.17	27.17	12.27	6.33	12.67	8.47	4.42
38	ENSG00000198691.7	<ABCA4>	0.88	0.2	0.07	0.29	0	1.18	0.58	0.96	0.49	0.65	0.36	0.37	0.72	0.95	0.3	0.52	0.29	0.2	1.91	0.67	0.42	1.79	0.12	0.69	0.25	1.17	0.95	0.6	0.41	0.53	0.34	0.5	1.17	0.47	0.05	0.13	0.38	0.38	0.13	0.48	1.48	0.57	0.14	1.5	1.01	0.11	0.84
39	ENSG00000154265.11	<ABCA5>	42.07	51.83	42.97	45.54	28.5	56.61	20.44	37.92	47.15	48.63	54.43	41.29	61.13	68.82	47.34	41.74	37.92	53.04	65.15	44.83	75.73	59.02	46.65	66.72	47.08	41.38	64.09	43.68	31.75	34.7	29.1	39.63	41.09	60.84	64.19	28.41	37.71	39.42	30.8	39.41	52.88	39.41	53.56	43.75	62.09	46.75	65.32
40	ENSG00000154262.8	<ABCA6>	126.74	113.9	113.11	98.04	57.15	117.29	70.82	62.28	103.47	147.61	70.36	99.57	162.02	156.14	81.61	60.05	138.23	103.94	129.77	66.06	111.79	73.38	115.39	147.85	106.29	159.27	178.14	86.9	78.82	73.1	27.27	84.35	141.69	134.08	138.4	69.46	83.97	85.24	61.81	80.22	84.42	217.7	88.59	116.12	98.55	64.87	245.24
41	ENSG00000064687.8	<ABCA7>	10.14	10.87	9.8	6.46	8.64	16.68	14.03	8.65	17.48	15.24	10.2	14.95	13.66	11.27	12.17	6.35	11.24	9.95	8.95	10.38	12.51	6.49	5.63	24.41	6.67	18.97	25.99	15.46	20.06	11.46	24.55	8.83	7.67	21.44	19.23	16.23	11.29	13.57	8.02	7.81	23.28	23.5	21.07	20.54	22.8	9.54	21.81
42	ENSG00000141338.9	<ABCA8>	267.98	151.07	357.22	207.96	275.51	330.2	232.93	91.82	380.3	263.83	123.95	365.38	363.56	389.14	145.6	143.28	216.8	119.16	198.94	287.1	162.39	220.15	139.22	206.88	271.72	274.6	153.52	199.47	426.57	205.22	50.41	243.96	210.45	511.52	546.17	311.32	294.31	303.89	97.13	201.77	280.71	617.87	321.41	336.05	271.17	180.76	232.9
43	ENSG00000154258.12	<ABCA9>	27.44	27.24	34.61	45.82	19.15	40.68	23.85	30.13	33.72	62.82	31.39	39.14	43.33	68.55	27.97	27.54	39.26	29.56	66.47	28.29	31.73	24.16	19.83	52.07	44.2	38.6	28.86	44.53	26.68	43.35	6.36	20.07	43.26	41	66.77	19.74	53.82	101.67	18.51	56.05	41.77	95.09	62.59	63.23	72.28	38.45	67.72
44	ENSG00000085563.10	<ABCB1>	28.01	21.46	18.29	12.83	16.05	14.25	20.86	10.69	26.77	21.66	10.47	19.91	9.55	22.09	16.29	19.37	23.92	13.45	54.84	28.07	10.73	18.75	16.35	14.33	11.44	37.64	24.43	14.62	15.12	29.62	11.16	14.88	16.74	29.8	26.23	18.05	15.42	17.3	14.86	32.26	27.71	18.49	18.99	17.46	21.96	18.26	20.78
45	ENSG00000135776.4	<ABCB10>	3.59	3.04	2.54	0.69	1.02	2.37	2.29	1.03	5.68	0.85	1.52	1.55	3.65	1.39	0.92	2.9	2.16	1.58	2.67	1.37	3.08	2.16	2.35	1.89	2.13	2.14	2	1.38	1.9	0.44	0	0.37	2.56	5.98	1.44	2.51	3.87	2.4	0.26	0.56	5.45	3.2	1.52	2.4	2.22	0.76	2.02
46	ENSG00000073734.8	<ABCB11>	0	0	0	0.25	0.04	0.04	0.04	0	0	0	0.04	0	0	0.13	0	0.09	0.07	0	0	0	0.15	0	0.09	0	0	0	0	0	0	0	0	0	0	0	0	0	0.07	0	0.02	0.09	0.15	0.09	0.05	0.19	0	0	0
47	ENSG00000005471.11	<ABCB4>	4.43	2.09	7.49	1.09	5.79	14.19	13.33	4.06	16.02	1.46	1.29	11.52	5.42	5.56	10.65	5.72	3.19	2.41	4.45	20.49	3.08	8.54	6.29	1.29	4.02	2.68	3	2.7	11.84	3.62	0.92	4.02	5.17	7.71	21.14	8.72	5.44	8.45	2.45	3.14	21.9	10.88	13.96	5.93	3.63	2.61	2
48	ENSG00000004846.12	<ABCB5>	1.02	0.43	1.1	0.42	1.76	0.88	0.86	0.7	1.83	0.31	0.4	3.41	0.95	1.85	3.38	1.66	0.85	0.66	0.98	1.25	1.78	1.95	0.52	2.23	0.68	0.49	0.61	0.86	1.47	0.35	0.54	1.57	0.47	0.55	2.47	1.22	1.12	0.98	0.46	0.15	1.86	2.46	3.69	0.95	0.46	0.91	1.26
49	ENSG00000115657.8	<ABCB6>	67.71	92.61	62.7	86.75	39.41	47.97	48	55.3	77.02	57.62	92.84	53.96	58.77	41.8	47.97	56.81	61.12	65.75	54.69	65.98	109.97	50.32	59.87	69.37	56.9	77.7	82.83	66.26	55.74	70.08	87.55	49.36	60.6	90.3	115.98	55.89	62.4	62.33	53.46	88.89	78.2	94.67	67.78	58.74	72.69	55.39	68.95
50	ENSG00000131269.11	<ABCB7>	20.5	19.93	15.11	19.27	21.11	14.89	16.84	15.45	11.22	18.75	15	22.69	22.92	25.61	12.71	13.94	18.71	15.2	19.77	23.81	17.56	15.44	18.53	19.79	12.38	17.7	21.81	25.63	17.11	20.17	16.43	23.94	23.07	20.09	29.15	19.16	24.25	24.13	14.14	16.62	24.83	21.8	21.87	18.61	25.95	12.02	17.92
51	ENSG00000197150.8	<ABCB8>	61.14	42.6	56.45	39.14	49.69	47.61	50.14	35.38	62.05	52.64	61.63	55.4	53.43	63.5	47.41	39.17	45.48	38.35	42.84	61.48	42.45	46.3	39.6	45.38	42.61	47.72	52.07	64.09	53.55	42.55	43.34	45.07	34.3	61.79	62.13	54.34	61.01	48.77	35.85	44.9	68.9	70.33	51.21	60.2	54.63	40.67	56.03
52	ENSG00000150967.13	<ABCB9>	10.63	7.38	5.16	2.73	6.64	6.94	6.77	6.23	9.83	9.01	11.36	8.09	3.24	5.78	10.15	6.9	7.52	4.46	8.39	17.56	1.99	5.39	6.57	5.02	9.15	7.99	4.53	7.5	6.83	6.66	28.8	7.56	7.25	10.57	9.42	7.8	6.77	9.58	3.47	9.5	11.76	7.2	7.74	15.85	8.76	9.76	4.18
53	ENSG00000103222.14	<ABCC1>	18.26	23.91	16.87	21.77	16.81	26.34	18.48	22.16	18.26	20.87	17.61	20.53	14.46	13.91	13.19	19.13	16.35	19.81	15.41	17.16	23.66	14.73	10.82	19.57	15.26	21.41	17.88	20.44	17.1	16.24	23.87	16.35	15.15	15.53	21.79	19.3	19	14.43	17.98	22.54	25.09	13.41	18.84	20.53	21.16	16.66	30.11
54	ENSG00000124574.10	<ABCC10>	50.78	44.56	48.5	35.05	26.17	40.11	41.15	35.13	52.76	42.75	41.66	43.31	51.18	38.31	30.98	27.8	39.47	26.76	36.81	43.33	37.81	25.84	43.99	42.64	35.44	51.08	49.84	50.15	45.03	31.7	51.44	35.7	28.38	64.71	56.65	45.29	55.06	35.77	29.51	45.23	71.51	63.75	42.38	45.51	43.68	29.84	49.01
55	ENSG00000121270.11	<ABCC11>	0.22	0.04	0.23	0.29	0.09	0.81	0.85	0	0.37	0.45	0.27	0.6	0.19	0.57	0.27	0.28	0.25	0.04	0.56	0.26	0.27	0.27	0.37	0.54	0.2	0.04	0.18	0.11	0.47	0.67	0.11	0.41	0.33	0.38	0.05	0.35	0.17	0.28	0.24	0.8	0.24	0.14	0.31	0.13	0.76	0.18	0.22
56	ENSG00000140798.11	<ABCC12>	0	0	0	0	0	0	0	0	0	0	0	0	0	0	0	0	0	0.17	0	0	0	0	0	0	0	0.02	0	0	0	0	0	0	0	0	0.1	0	0.03	0	0.04	0	0	0	0	0	0	0.09	0.09
57	ENSG00000023839.6	<ABCC2>	4.02	8.32	15.86	7.24	4.79	6.11	1.73	5.68	4.15	5.85	4.59	1.36	4.29	4.97	2.69	1.4	2.92	4.99	1.67	1.57	7.18	8.9	1.92	5.88	2.65	7	2.23	7.4	3.35	2.31	2.19	3.02	4.38	4.68	4.55	3.67	5.42	3.36	3.91	2.08	2.03	4.25	8.92	3.79	5.69	4.51	4.75
58	ENSG00000108846.11	<ABCC3>	3.88	7.74	3.5	9.79	3.43	8.17	6.77	5.66	11.19	6.15	17.28	5.67	8.26	14.49	7.06	6.28	5.29	3.93	11.56	2.56	8.6	5.2	1.69	7.29	3.6	12.21	7.25	4.63	6.98	7.31	28.18	1.92	1.28	5.94	8.54	5.07	7.7	19.74	1.48	9.85	9.22	13.14	6.76	10.74	9.38	8.65	6.84
59	ENSG00000125257.9	<ABCC4>	0.56	0.18	0.75	0.24	0.86	0.47	0.38	0.33	1.71	2.46	1.54	1.52	1.96	0.13	0.41	1.33	0.27	0.65	3.23	0.43	0.76	0.46	0.76	0.07	0.5	0.73	2.35	0.95	0.54	0.64	0.75	0.28	1.77	0.28	1.22	0.31	0.33	0.59	0	1.24	0.8	0.24	0.77	1.45	0.43	0.63	1.91
60	ENSG00000114770.12	<ABCC5>	120.44	72.47	128.27	64.06	54.07	91.14	88.92	39.52	130.62	90.67	56.48	144.15	149.53	138.41	73.24	42.37	105.29	75.63	82.44	130.78	72.58	44.62	92.78	107.31	94.06	137.36	125.66	115.21	113.57	78.01	62.63	73.84	77.15	155.75	195.03	101.11	127.3	83.48	58.27	86.68	146.22	213.18	116.15	101.91	102.91	49.08	111.25
61	ENSG00000091262.10	<ABCC6>	0.75	0.72	5.62	0.29	1.34	2.65	2.77	1.47	2.52	1.58	0.44	7.67	0.96	1.61	1.8	0.48	0.97	1.14	1.22	0.87	2.73	0.64	0.32	1.63	1.68	0.11	0.86	4.26	1.78	1.11	0.17	1.59	2.28	1.12	0.57	6.65	1.38	3.38	0.09	1.63	16.09	3.58	2.49	0.2	0.82	0.5	0.38
62	ENSG00000006071.7	<ABCC8>	50	3.01	17.4	5.83	31.6	19.93	46.95	4.34	50.48	16.93	5.9	53.89	26.28	9.27	35.7	18.3	17.41	16.79	15.86	56.72	5.35	28.58	23.98	12.55	19.73	37.81	32.49	26.66	29.55	22.17	1.46	8.46	9.2	11.54	29.49	28.64	44.06	18.89	14.46	15.1	46.63	9.16	38.51	12.65	17.12	5.44	4.25
63	ENSG00000069431.6	<ABCC9>	3.11	2.65	2.36	3.49	1.2	5.95	1.95	2.94	2.95	2.28	2.25	1.84	1.58	2	1.11	2.16	0.85	1.9	2.7	2.41	2.55	1.18	1.08	2.99	1.01	1.5	1.98	0.95	1.6	1.67	1.93	2.3	1.9	0.74	2.66	1.34	2.64	5.18	1.14	2.62	4.5	2.31	2.84	1.43	2.71	1.83	6.69
64	ENSG00000101986.8	<ABCD1>	0.95	1.01	0.33	1.97	1.48	0.59	0.54	2.24	1.09	0.79	1.6	0.95	0.79	1.25	1.45	1.35	1.23	2.45	1.03	2.37	1.99	1.4	0.78	1.43	0.88	2.09	1.12	0.75	0.48	1.05	1.01	1.38	2.04	1.21	0.4	0.76	0.86	3.21	1.16	1.04	1.3	0.65	1.46	2.12	2.64	1.31	2.36
65	ENSG00000173208.3	<ABCD2>	0	0	0	0	0	0	0	0	0	0	0	0	0	0	0	0	0	0	0	0	0	0	0	0	0	0	0	0	0	0	0	0	0	0	0	0	0	0	0	0	0	0	0	0	0	0	0
66	ENSG00000117528.7	<ABCD3>	99.02	78.14	63.42	80.78	101.76	76.68	67.29	69.87	115.97	83.82	94.47	112.36	105.7	134.98	121.25	59.35	93.53	104.8	116.73	128.93	69.21	115.49	163.54	109.96	116.28	95.2	61.96	74.24	62.7	117.09	53.58	125.18	107.16	108.13	99.29	86.75	88.68	73.38	81.36	110.06	69.72	64.72	72.38	139.47	130.32	113.04	63.76
67	ENSG00000119688.16	<ABCD4>	173.8	136.78	213.41	144.92	208.18	189.54	178.18	154.45	240.51	182.08	128.27	182.28	310.85	222.5	186.54	130.41	170.47	143.15	152.15	208.87	128.86	176.11	179.96	151.38	184.48	183.41	253.36	203.26	211.16	137.48	133.99	170.98	166.97	233.83	263.92	186.91	211.09	202.6	121.27	140.91	257.19	327.89	246	156.69	177.49	123.29	152.17
68	ENSG00000164163.6	<ABCE1>	15.89	11.56	13.81	18.35	13.69	13.91	9.8	6.65	15.04	16.64	10.89	17.32	22.78	12.84	12.29	19.77	11.55	12.03	21.75	11.71	10.69	19.4	10.11	11.53	15.06	8.87	32	18.51	16.13	5.95	11.89	13.81	13.49	14.51	27.67	10.29	18.06	7.37	11.97	16.62	14.66	25.39	9.91	9.19	17.02	12.28	23.83
69	ENSG00000204574.8	<ABCF1>	18.71	42.83	19.81	20.05	24.27	19.89	20.39	51.68	32.1	21.79	27.54	17.23	14.63	34.57	25.36	26.75	20.84	24.84	7.77	17.82	37.76	27.91	36.99	18.83	25.01	26.88	25.01	28.77	26.19	21.09	50.69	25.03	28.47	21.77	28.82	19.99	15.91	41.68	21.58	29.52	36.23	23.88	23.52	40.83	26.85	17.97	20.14
70	ENSG00000033050.3	<ABCF2>	50.88	56.91	31.17	44.93	30.93	34.35	34.2	51.51	30.11	37.4	61.47	35.08	25.16	33.74	32.93	103.42	36.93	46.02	37.07	34.87	44.89	38.15	43.51	41.31	35.59	39.9	41.01	33.18	34.94	40.77	121.53	37.25	40.72	45.77	38.86	37.88	39.23	29.81	34.87	61.47	38.55	39.46	30.95	52.88	49.37	44.46	46.62
71	ENSG00000161204.7	<ABCF3>	112.51	137.16	93.21	114.88	113.45	84.33	105.2	139.92	136.9	96.16	134.5	111.06	119.57	104.29	92.6	120.59	93.89	112.18	97.33	105.43	107.35	118.02	114.79	104.43	78.87	92.71	145.84	104.64	92.92	98.2	107.13	99	95.6	121.19	129.28	97.45	92.89	91.6	98.66	120.73	122.48	133.7	108.41	101.66	119.79	94.58	114.4
72	ENSG00000160179.14	<ABCG1>	24.67	31.04	17.78	15.29	27.86	23.24	19.43	35.11	11.87	24.65	19.59	28.24	18.96	24.68	22.51	32.79	25.8	14.6	28.66	24.35	12.02	26.58	27.93	27.24	25.62	16.57	50.63	14.64	19.5	25.99	18.3	13.16	18.36	16.62	23.8	17.68	20.94	21.15	34.28	30.93	29.77	12.59	39.52	18.85	29.25	26.73	48.37
73	ENSG00000118777.6	<ABCG2>	4.31	1.24	1.44	1.57	5.32	0	3.6	1.78	5.36	1.19	1.71	4.4	0.67	3.94	3.61	1.03	1.15	4.5	3.27	2.04	0.86	2.9	5.05	0.65	1.96	5.02	1.21	1.79	1.49	3.16	0.36	8.79	6	0.97	1.79	6.87	0.28	0.47	1.62	3.38	1.64	3.19	1.59	4.37	4.68	4.23	1.03
74	ENSG00000172350.5	<ABCG4>	0.07	0.07	0.09	0.09	0.07	0.3	0.77	0.39	0.16	0	0	0	0.14	0.51	0.07	0.11	0	0.37	0.24	0.36	0.07	0.09	0.5	0.38	0.13	0.04	0.93	0.12	0.43	0.25	0.02	0.11	0.09	0.33	0	0.04	0.4	0.14	0.15	0.09	0.26	0.03	0	0.13	0	0.07	0.04
75	ENSG00000138075.7	<ABCG5>	0.04	0.04	0.11	0	0.04	0.11	0.04	0.07	0.07	0.11	0.07	0	0.24	0.04	0.04	0.11	0.07	0.07	0	0.14	0.07	0.18	0.14	0	0.18	0.07	0.11	0.07	0	0.07	0.04	0.07	0.15	0.07	0.07	0	0.07	0.1	0	0.07	0.2	0.03	0.03	0	0.07	0.07	0.18
76	ENSG00000143921.6	<ABCG8>	0	0	0	0	0	0	0	0	0	0	0	0	0	0	0	0	0	0	0	0	0	0	0	0	0	0	0	0	0	0	0	0	0	0	0	0	0	0	0	0	0	0	0	0	0	0	0
77	ENSG00000143994.9	<ABHD1>	8.19	2.14	11.38	4.16	4.65	8.6	9.85	1.14	9.92	7.59	3.87	13.13	7.12	8.42	6.17	3.08	7.87	3.87	5.99	9.29	2.24	4.7	11.48	3.07	3.71	8.98	7.68	8.36	5.06	4.51	1.31	7.74	4.44	15.74	10.35	8	6.49	6.05	3.82	5.21	12.22	18.25	13.21	2.06	9.11	4.97	2.73
78	ENSG00000144827.4	<ABHD10>	10.93	6.61	2.96	6.37	10.53	4.25	3.46	3.29	6.49	5.83	4.19	5.39	4.25	8.11	2.53	7.03	4.6	3.5	5.92	3.75	2.44	8.74	6.04	6.49	3.53	4.47	4.06	6.94	4.84	9.31	3.73	5.4	5.22	9.05	4.07	7	6.33	5.45	8.78	8.98	5.35	3.65	10.98	6.07	6.03	6.06	5.96
79	ENSG00000106077.14	<ABHD11>	12.37	9.51	20.36	20.74	16.44	22.62	17.92	24.65	22.49	22.38	25.38	12.03	12.86	21.63	25.22	15.86	17.55	23.92	16.95	10.56	19.67	15.47	12.92	18.86	21.55	17.25	18.74	24.12	22.3	22.57	22.33	22.91	21.14	25.23	7.12	17.03	16.33	19.74	16.84	30.61	18.12	16.67	23.7	15.53	21.22	23.83	13.89
80	ENSG00000100997.14	<ABHD12>	27.72	18.17	16.23	14.37	20.91	12.88	19.67	23.46	16.13	17.4	24.4	17.95	23.06	21.01	16.66	14.4	23.56	22.58	22.53	20.12	20.02	14.08	27.93	14.15	24.97	20.23	13.52	14.44	22.42	23.71	21.21	25.71	15.64	16.81	15.23	25.43	17.5	16.81	15.4	23.3	20.42	12.95	14.53	20.51	20.9	21.02	15.19
81	ENSG00000131969.10	<ABHD12B>	0.31	0.22	0.88	0.83	1.3	2.46	1.6	0.39	0.72	0.67	2.12	0.64	1.7	0.72	1.57	0.96	1.19	1.71	1.02	1.33	0.22	1.03	0.59	0.53	0.94	0.42	0.61	0.91	0.83	0.53	0.19	0.7	1.33	0.55	1.07	0.89	0.35	0.24	1.2	1.41	0.72	1.02	0.35	0.78	0.51	1.87	2
82	ENSG00000139826.5	<ABHD13>	0	0	0	0	0	0	0	0	0	0	0	0	0	0	0	0	0	0	0	0	0	0	0	0	0	0	0	0	0	0	0	0	0	0	0	0	0	0	0	0	0	0	0	0	0	0	0
83	ENSG00000248487.4	<ABHD14A>	2.64	6.82	4.29	4.29	1.37	5.5	3.78	7.42	4.64	4.44	4.79	1.98	2.67	4.59	4.1	1.74	4.85	4.5	3.43	1.99	2.5	2.72	1.62	5.22	1.84	4.05	3.41	4.12	5.61	4.02	4.69	1.14	1.35	5.94	4.67	5.27	3.25	3.45	1.7	6.49	3.89	3.55	1.46	3.57	5.57	3.24	5.33
84	ENSG00000114786.11	<ABHD14A-ACY1>	5.8	0.94	5.93	3.78	2.08	3.66	3.96	2.79	4.03	2.07	4.79	3.68	4.94	3.83	1.33	1.83	5.05	6.1	6.37	4.4	2.6	3.87	3.14	3.88	3.35	1.21	1.91	4.22	4.59	3.47	2.31	4.26	1.99	4.18	2.63	5.73	2.41	4.04	2.01	4.94	4.24	5.27	5.52	1.6	6.12	3.18	1.65
85	ENSG00000114779.15	<ABHD14B>	119.96	83.76	114.07	121.98	89.44	123.36	130.27	95.68	102.9	125.93	99.99	122.68	105.16	115.11	99.04	90.64	129.59	114.37	116.95	114.98	115.05	110.5	101.45	121.86	108.24	117.43	105.66	119.52	121.55	123.97	72.2	119.24	109.4	120.45	68.4	122.46	117.27	133.54	131.15	130.97	117.32	124.77	114.11	103.34	134.52	102.71	100.03
86	ENSG00000168792.4	<ABHD15>	0	0	0	0	0	0	0	0	0	0	0	0	0	0	0	0	0	0	0	0	0	0	0	0	0	0	0	0	0	0	0	0	0	0	0	0	0	0	0	0	0	0	0	0	0	0	0
87	ENSG00000204427.7	<ABHD16A>	130.23	109.21	102.43	102.22	119.48	100.82	118.93	107.51	118.45	116.27	100.12	121.98	111.19	85.04	109.83	90.94	92.95	108.93	86.44	108.13	83.65	83.07	101.52	100.15	85.54	109.9	112.6	125.2	117.32	95.67	109.72	112.75	97.36	118.22	124.84	114.3	108.94	113.64	89.71	104.71	130.95	104.07	140.81	103.47	117.22	92.65	99.41
88	ENSG00000183260.5	<ABHD16B>	0	0	0	0	0	0	0	0	0	0	0	0	0	0	0	0	0	0	0	0	0	0	0	0	0	0	0	0	0	0	0	0	0	0	0	0	0	0	0	0	0	0	0	0	0	0	0
89	ENSG00000129968.11	<ABHD17A>	223.9	156.12	184.16	162.67	201.77	162.5	212.31	152.98	169.98	194.28	237.05	234.85	190.93	141.37	222.36	215.76	165.73	181.1	210.39	213.99	149.09	120.9	183.39	169.65	180.78	204.08	202.33	180.1	155.13	175.78	186.53	185.18	139.45	147.71	145.76	193.15	137.32	158.98	173.55	210.24	179.36	127.37	192.3	168.96	167.49	194.03	157.8
90	ENSG00000107362.9	<ABHD17B>	5.58	2.75	2.89	3.89	6.02	3.66	2.68	4.46	4.45	3.26	3.41	7.19	3.18	6.4	3.57	3.47	3.81	3.91	3.96	3.13	2.46	5.04	6.16	3.74	4.85	3.52	2.51	2.49	2.73	2.64	2.48	3.15	5.59	0.64	2.66	4.05	1.87	2.49	6.2	3.75	3.25	1.02	1.46	3.68	1.19	6.58	4.23
91	ENSG00000136379.7	<ABHD17C>	0	0.61	0.46	2.24	1.3	4.41	0	0	0	0	2.43	1.8	2.19	5.32	0.87	0.24	0	0.72	0	0	0	0.64	0.78	0	1.24	0.35	0	0	0.97	0.95	0.28	0.68	0	0	0	0.31	0.56	1.81	0.33	1.84	0.37	0	1.29	0	0	2.02	0
92	ENSG00000140526.12	<ABHD2>	0.72	4.72	7.39	3.49	6.5	1.58	3.12	7.16	1.95	5.58	6.37	1.1	7.19	1.72	9.57	5.91	4.4	0.81	6.15	6.97	9.93	2.03	6.31	7.06	5.59	1.61	1.12	5.64	9.58	4.84	3.34	3.3	7.12	0.54	3.27	0.53	7.38	3.89	0.48	0.5	8.23	0	0.84	1.56	1.97	9.61	0.81
93	ENSG00000158201.5	<ABHD3>	14.08	22.96	27.24	21.19	17.85	16.58	11.78	16.39	22.93	26	21.09	24.24	36.96	30.6	16.98	17.08	28.63	28.84	31.57	28.24	36.35	24.92	26.05	28.29	22.06	42.19	41.54	18.81	21.87	25.97	10.22	19.78	24.91	50.04	71.44	17.68	29.87	31.19	22.66	26.09	24.95	64.51	25.54	28.66	49.92	23.57	35.02
94	ENSG00000100439.6	<ABHD4>	66	59.92	80.06	88.39	57.65	67.79	80.42	67.75	64.32	69.14	54.23	65.5	68.73	94.6	54.62	46.25	80.93	77.68	64.84	59.44	58.28	63.69	47.08	75.14	66.99	83.07	65.56	87.18	85.05	85.54	40.64	62.38	73.48	56	77.6	85.66	70.87	68.55	97.31	83.34	63.82	72.9	81.91	78.74	100.2	70.73	66.55
95	ENSG00000011198.3	<ABHD5>	16.57	18.15	12.95	16.63	13.68	18.03	13.87	24.91	14.91	28.03	16.28	20.6	13.46	18.27	14.29	20.36	21.49	20.6	20.98	13.5	24.99	13.3	21.96	25.28	25.6	15.72	19.57	13.62	11.23	23.11	16.31	21.88	28.44	20.94	19.39	18.03	18.88	18.16	25.69	21.84	13.28	20.42	13.66	18.78	20.1	15.16	70.52
96	ENSG00000163686.9	<ABHD6>	6.91	5.44	7.28	8.96	6.67	11.58	6.09	13.39	7.26	8.38	5.01	12.69	5.95	4.53	13.76	3.23	5.54	9.9	7.06	21.8	12.35	9.8	9.03	10.43	10.43	6.6	4.74	2.79	10.82	12.22	6.81	14.1	3.96	9.14	2.47	10.47	15.19	5.26	8	11.11	5.86	6.85	7.56	14.66	12.69	9.43	15.87
97	ENSG00000127220.5	<ABHD8>	0	0	0	0	0	0	0	0	0	0	0	0	0	0	0	0	0	0	0	0	0	0	0	1	0	0	0	0.53	0	0	0	0	0	0	0	0	0	0	0	0	0	0	0	0	0	0	0
98	ENSG00000136754.12	<ABI1>	61.62	53.44	46.6	66.25	56.63	61.68	47.78	62.04	59.32	61.71	43.46	55.68	44.86	68.42	44.1	39.99	55.13	62.27	53.93	53.52	53.76	62.7	61.05	58.54	63.53	50.62	51.32	52.77	41.13	61.9	43.52	56.46	56.51	48.52	45.65	57.89	54.65	53.06	61.68	58.28	50.72	38.62	51.16	58.64	55.69	62.67	54.21
99	ENSG00000138443.11	<ABI2>	55.27	41.66	45.32	44.84	49.74	48.53	52.59	36.72	54.59	46.7	36.18	69.97	54.52	64.51	43.66	42.07	50.93	42.66	49.83	56.44	36.94	46.99	52.07	42.87	52.9	46.22	40.01	50.45	42.53	45.66	36.53	37.68	39.35	47.91	55.72	54.38	50.97	40.95	46.1	46.57	49.4	63.46	52.97	45.9	42.83	43.26	41.31
100	ENSG00000108798.4	<ABI3>	1.85	8.84	3.52	6.84	5.79	4.39	5.44	7.75	7.91	11.53	8.21	9.54	1.74	0.26	4.58	4.06	11.94	5.31	4.54	1.35	3.99	3.91	4.62	4.37	6.05	6.23	7.24	4.91	8.27	4.4	8.51	9.22	6.11	4.44	4.78	7.25	4.32	3.54	4.67	6.18	5.64	3.25	10.52	3.53	6.58	5.97	7.17
101	ENSG00000154175.12	<ABI3BP>	173.91	180.66	293.14	126.41	221.37	203.64	167.91	111.15	199.48	120.84	52.14	152.1	221.5	122.98	131.75	76.93	103.57	147.19	59.03	93.23	171.69	162.35	69.06	100.46	79.88	132.65	61.79	266.23	201.11	82.67	19.37	109.6	195.77	79.57	152.03	235.64	475.69	141.39	277.66	77.74	178.1	51.17	258.3	52.98	173.44	135.23	113.37
102	ENSG00000097007.13	<ABL1>	18.19	12.77	13.22	11.02	26.91	14.96	17.36	15.25	13.65	14.41	10.46	27.55	15.8	19.54	12.63	22.74	12.3	15.81	13.69	23.81	10.67	20.6	13.06	12.53	12.27	15.72	11.77	12.32	13.04	13.11	13.58	10.71	14.58	10.37	18.63	15.41	20.66	15.56	12.15	19.83	27.05	12.59	15.89	15.57	18.51	11.92	16.53
103	ENSG00000143322.15	<ABL2>	14.33	19.08	17.4	15.74	27.49	11.95	24.22	26.71	13.81	17.06	19.53	18.06	21.98	13.87	15.7	43.29	13.08	14.37	18.33	15.62	13.79	20.14	13.25	13.33	15.89	11.58	19	12.94	15.89	20.28	62.99	12.59	15.08	14.7	16.28	14.41	19.91	16.85	10.25	17.35	20.08	21.49	19.5	18.54	19.44	14.36	28.21
104	ENSG00000099204.14	<ABLIM1>	112.4	163.28	145.35	184.97	111.47	220.51	93.84	127.39	137.34	144.75	119.47	109.84	132.54	181.53	136.1	84.42	118.51	207.54	112.03	77.87	150.27	167.86	128.65	177.86	196.84	89.27	130.07	131.49	134.67	123.53	38.93	124.05	196.92	98.02	127.09	115.05	190.88	99.04	216.77	116.37	140.58	113.73	173.9	167.85	136.7	194.02	218.11
105	ENSG00000163995.14	<ABLIM2>	23.56	87.64	20.01	130.59	19.19	20.68	18.39	57.89	13.56	23.08	114.21	13.66	27.07	17.1	20.02	73.88	36.64	52.96	32.84	11.23	53.44	17.17	8.1	39.61	34.34	32.86	38.23	21.26	21.45	29.97	48.02	26.06	17.14	22.88	20.88	15.23	22.43	33.93	35.92	40.87	15.71	24.62	13.75	35.52	45.91	29.02	49.98
106	ENSG00000173210.15	<ABLIM3>	102.59	84.66	94.03	90.37	109.91	102.52	105.13	99.68	112.45	79.01	125.7	94.08	97.4	94.6	122.86	86.07	98.67	86.49	73.62	144.6	77.59	108.91	185.48	114.2	144.87	77.59	90.7	81.78	108.24	71.78	213.78	138.63	112.38	108.18	105.97	81.82	79.26	118.82	92.35	88.28	129.67	139.4	105.42	106.83	96.57	126.76	88.48
107	ENSG00000159842.10	<ABR>	78.1	84.42	104.97	91.25	75.78	97.81	76.96	109.84	81.01	101.93	103.48	64.69	118.97	92	87.07	59.61	98.11	83.24	73.99	79.18	58.19	90.82	61.85	97.05	80.11	69.24	96.03	95.94	99.83	74.14	93.09	88.86	74.91	80.03	74.97	78.08	101.63	86.58	77.36	101.36	99.54	80.68	118.83	69.34	100.49	123.08	115.08
108	ENSG00000174429.3	<ABRA>	0	0	0	0	0	0	0	0	0	0	0	0	0	0	0	0	0	0	0	0	0	0	0	0	0	0	0	0	0	0	0	0	0	0	0	0	0	0	0	0	0	0	0	0	0	0	0
109	ENSG00000146386.7	<ABRACL>	0	0	0	0	0	0	0	0	0	0	0	0	0	0.51	0.37	0	0	0	0	0	0	0	0.32	0	0	0	0	0	0	0	0.36	0	0	0	0.36	0	0.35	0	0	0	0	0	0	0	0	0	0.31
110	ENSG00000146109.3	<ABT1>	0	0	0	0	0	0	0	0	0	0	0	0	0	0	0	0	0	0	0	0	0	0	0	0	0	0	0	0	0	0	0	0	0	0	0	0	0	0	0	0	0	0	0	0	0	0	0
111	ENSG00000114626.13	<ABTB1>	314.54	203.25	448.42	226.73	211.97	310.52	302.69	203.87	340.99	352.56	165.16	373.95	486.55	329.54	232.56	70.19	221.78	215.12	213.33	384.6	227.59	170.08	214.64	285.1	290.81	319.88	277	434.44	435.84	260.99	36.34	267.2	315.49	350.95	384.36	296.62	364.63	367.61	311.83	237.87	360.77	380.2	390.19	221.76	379.19	232.87	258.72
112	ENSG00000166016.4	<ABTB2>	9.82	7.81	9.33	7.06	6.23	7.38	10.61	5.24	10.34	8.98	6.95	14.51	5.49	6.05	5.57	9.06	5.63	12.2	6.88	6.06	2.64	4.67	5.88	6.55	10.13	4.8	6.9	8.05	5.94	10.22	3.04	6.47	4.86	3.66	4.74	12.67	4.88	3.96	7.76	14.66	4.38	3.8	10.4	9.08	11.33	8.89	5.46
113	ENSG00000264194.1	<AC000003.2>	0	0	0	0	0	0	0	0	0	0	0	0	0	0	0	0	0	0	0	0	0	0	0	0	0	0	0	0	0	0	0	0	0	0	0	0	0	0	0	0	0	0	0	0	0	0	0
114	ENSG00000234469.2	<AC002365.1>	0	0	0	0	0	0	0	0	0	0	0	0	0	0	0	0	0	0	0	0	0	0	0	0	0	0	0	0	0	0	0	0	0	0	0	0	0	0	0	0	0	0	0	0	0	0	0
115	ENSG00000269449.1	<AC002451.1>	0	0	0	0	0	0	0	0	0	0	0	0	0	0	0	0	0	0	0	0	0	0	0	0	0	0	0	0	0	0	0	0	0	0	0	0	0	0	0	0	0	0	0	0	0	0	0
116	ENSG00000214921.2	<AC003102.1>	0	0	0	0	0	0	0	0	0	0	0	0	0	0	0	0	0	0	0	0	0	0	0	0	0	0	0	0	0	0	0	0	0	0	0	0	0	0	0	0	0	0	0	0	0	0	0
117	ENSG00000268069.1	<AC004466.1>	0	0	0	0	0	0	0	0	0	0	0	0	0	0	0	0	0	0	0	0	0	0	0	0	0	0	0	0	0	0	0	0	0	0	0	0	0	0	0	0	0	0	0	0	0	0	0
118	ENSG00000267970.1	<AC004899.1>	0	0	0	0	0	0	0	0	0	0	0	0	0	0	0	0	0	0	0	0	0	0	0	0	0	0	0	0	0	0	0	0	0	0	0	0	0	0	0	0	0	0	0	0	0	0	0
119	ENSG00000213888.2	<AC005003.1>	0	0	0	0	0	0	0	0	0	0	0	0	0	0	0	0	0	0	0	0	0	0	0	0	0	0	0	0	0	0	0	0	0	0	0	0	0	0	0	0	0	0	0	0	0	0	0
120	ENSG00000273452.1	<AC005358.1>	0	0	0	0	0	0	0	0	0	0	0	0	0	0	0	0	0	0	0	0	0	0	0	0	0	0	0	0	0	0	0	0	0	0	0	0	0	0	0	0	0	0	0	0	0	0	0
121	ENSG00000257040.1	<AC005477.1>	0	0	0	0	0	0	0	0	0	0	0	0	0	0	0	0	0	0	0	0	0	0	0	0	0	0	0	0	0	0	0	0	0	0	0	0	0	0	0	0	0	0	0	0	0	0	0
122	ENSG00000269205.1	<AC005606.1>	0	0	0	0	0	0	0	0	0	0	0	0	0	0	0	0	0	0	0	0	0	0	0	0	0	0	0	0	0	0	0	0	0	0	0	0	0	0	0	0	0	0	0	0	0	0	0
123	ENSG00000249034.1	<AC005609.1>	0	0	0	0	0	0	0	0	0	0	0	0	0	0	0	0	0	0	0	0	0	0	0	0	0	0	0	0	0	0	0	0	0	0	0	0	0	0	0	0	0	0	0	0	0	0	0
124	ENSG00000206044.3	<AC005841.1>	0	0	0	0	0	0	0	0	0	0	0	0	0	0	0	0	0	0	0	0	0	0	0	0	0	0	0	0	0	0	0	0	0	0	0	0	0	0	0	0	0	0	0	0	0	0	0
125	ENSG00000236669.1	<AC006372.1>	0	0	0	0	0	0	0	0	0	0	0	0	0	0	0	0	0	0	0	0	0	0	0	0	0	0	0	0	0	0	0	0	0	0	0	0	0	0	0	0	0	0	0	0	0	0	0
126	ENSG00000205821.4	<AC006435.1>	0	0	0	0	0	0	0	0	0	0	0	0	0	0	0	0	0	0	0	0	0	0	0	0	0	0	0	0	0	0	0	0	0	0	0	0	0	0	0	0	0	0	0	0	0	0	0
127	ENSG00000269094.1	<AC006449.1>	0	0	0	0	0	0	0	0	0	0	0	0	0	0	0	0	0	0	0	0	0	0	0	0	0	0	0	0	0	0	0	0	0	0	0	0	0	0	0	0	0	0	0	0	0	0	0
128	ENSG00000230000.1	<AC006455.1>	0	0	0	0	0	0	0	0	0	0	0	0	0	0	0	0	0	0	0	0	0	0	0	0	0	0	0	0	0	0	0	0	0	0	0	0	0	0	0	0	0	0	0	0	0	0	0
129	ENSG00000204957.1	<AC006486.1>	0	0	0	0	0	0	0	0	0	0	0	0	0	0	0	0	0	0	0	0	0	0	0	0	0	0	0	0	0	0	0	0	0	0	0	0	0	0	0	0	0	0	0	0	0	0	0
130	ENSG00000269446.1	<AC006967.1>	0	0	0	0	0	0	0	0	0	0	0	0	0	0	0	0	0	0	0	0	0	0	0	0	0	0	0	0	0	0	0	0	0	0	0	0	0	0	0	0	0	0	0	0	0	0	0
131	ENSG00000258881.2	<AC007040.11>	0.09	0.02	0.18	0.07	0.11	0.14	0.09	0.07	0.12	0.25	0.07	0.44	0.19	0.17	0.14	0.26	0.07	0.15	0.4	0.59	0.02	0.07	0.21	0.2	0.11	0.38	0.16	0.23	0.18	0.15	0.09	0.09	0.11	0.54	0	0.04	0.17	0.14	0.07	0.19	0.2	0.07	0.19	0.2	0.07	0.02	0.16
132	ENSG00000269883.1	<AC007375.1>	0	0	0	0	0	0	0	0	0	0	0	0	0	0	0	0	0	0	0	0	0	0	0	0	0	0	0	0	0	0	0	0	0	0	0	0	0	0	0	0	0	0	0	0	0	0	0
133	ENSG00000166329.2	<AC007431.1>	0	0	0	0	0	0	0	0	0	0	0	0	0	0	0	0	0	0	0	0	0	0	0	0	0	0	0	0	0	0	0	0	0	0	0	0	0	0	0	0	0	0	0	0	0	0	0
134	ENSG00000267893.1	<AC007461.1>	0	0	0	0	0	0	0	0	0	0	0	0	0	0	0	0	0	0	0	0	0	0	0	0	0	0	0	0	0	0	0	0	0	0	0	0	0	0	0	0	0	0	0	0	0	0	0
135	ENSG00000214670.3	<AC007956.1>	0	0	0	0	0	0	0	0	0	0	0	0	0	0	0	0	0	0	0	0	0	0	0	0	0	0	0	0	0	0	0	0	0	0	0	0	0	0	0	0	0	0	0	0	0	0	0
136	ENSG00000267941.1	<AC008267.1>	0	0	0	0	0	0	0	0	0	0	0	0	0	0	0	0	0	0	0	0	0	0	0	0	0	0	0	0	0	0	0	0	0	0	0	0	0	0	0	0	0	0	0	0	0	0	0
137	ENSG00000233828.2	<AC008394.1>	0	0	0	0	0	0	0	0	0	0	0	0	0	0	0	0	0	0	0	0	0	0	0	0	0	0	0	0	0	0	0	0	0	0	0	0	0	0	0	0	0	0	0	0	0	0	0
138	ENSG00000268397.1	<AC008443.1>	0	0	0	0	0	0	0	0	0	0	0	0	0	0	0	0	0	0	0	0	0	0	0	0	0	0	0	0	0	0	0	0	0	0	0	0	0	0	0	0	0	0	0	0	0	0	0
139	ENSG00000269215.1	<AC008964.1>	0	0	0	0	0	0	0	0	0	0	0	0	0	0	0	0	0	0	0	0	0	0	0	0	0	0	0	0	0	0	0	0	0	0	0	0	0	0	0	0	0	0	0	0	0	0	0
140	ENSG00000224730.1	<AC009892.10>	0	0	0	0	0	0	0	0	0	0	0	0	0	0	0	0	0	0	0	0	0	0	0	0	0	0	0	0	0	0	0	0	0	0	0	0	0	0	0	0	0	0	0	0	0	0	0
141	ENSG00000269808.1	<AC010327.2>	0	0	0	0	0	0	0	0	0	0	0	0	0	0	0	0	0	0	0	0	0	0	0	0	0	0	0	0	0	0	0	0	0	0	0	0	0	0	0	0	0	0	0	0	0	0	0
142	ENSG00000214248.2	<AC010336.1>	0	0	0	0	0	0	0	0	0	0	0	0	0	0	0	0	0	0	0	0	0	0	0	0	0	0	0	0	0	0	0	0	0	0	0	0	0	0	0	0	0	0	0	0	0	0	0
143	ENSG00000269636.1	<AC010441.1>	0	0	0	0	0	0	0	0	0	0	0	0	0	0	0	0	0	0	0	0	0	0	0	0	0	0	0	0	0	0	0	0	0	0	0	0	0	0	0	0	0	0	0	0	0	0	0
144	ENSG00000226180.2	<AC010536.1>	0	0	0	0	0	0	0	0	0	0	0	0	0	0	0	0	0	0	0	0	0	0	0	0	0	0	0	0	0	0	0	0	0	0	0	0	0	0	0	0	0	0	0	0	0	0	0
145	ENSG00000268822.1	<AC011298.1>	0	0	0	0	0	0	0	0	0	0	0	0	0	0	0	0	0	0	0	0	0	0	0	0	0	0	0	0	0	0	0	0	0	0	0	0	0	0	0	0	0	0	0	0	0	0	0
146	ENSG00000204850.3	<AC011484.1>	0	0	0	0	0	0	0	0	0	0	0	0	0	0	0	0	0	0	0	0	0	0	0	0	0	0	0	0	0	0	0	0	0	0	0	0	0	0	0	0	0	0	0	0	0	0	0
147	ENSG00000213922.1	<AC011500.1>	0	0	0	0	0	0	0	0	0	0	0	0	0	0	0	0	0	0	0	0	0	0	0	0	0	0	0	0	0	0	0	0	0	0	0	0	0	0	0	0	0	0	0	0	0	0	0
148	ENSG00000265629.1	<AC011897.1>	0	0	0	0	0	0	0	0	0	0	0	0	0	0	0	0	0	0	0	0	0	0	0	0	0	0	0	0	0	0	0	0	0	0	0	0	0	0	0	0	0	0	0	0	0	0	0
149	ENSG00000233863.1	<AC012215.1>	0	0	0	0	0	0	0	0	0	0	0	0	0	0	0	0	0	0	0	0	0	0	0	0	0	0	0	0	0	0	0	0	0	0	0	0	0	0	0	0	0	0	0	0	0	0	0
150	ENSG00000269855.1	<AC012313.1>	0	0	0	0	0	0	0	0	0	0	0	0	0	0	0	0	0	0	0	0	0	0	0	0	0	0	0	0	0	0	0	0	0	0	0	0	0	0	0	0	0	0	0	0	0	0	0
151	ENSG00000268809.1	<AC012360.2>	0	0	0	0	0	0	0	0	0	0	0	0	0	0	0	0	0	0	0	0	0	0	0	0	0	0	0	0	0	0	0	0	0	0	0	0	0	0	0	0	0	0	0	0	0	0	0
152	ENSG00000269810.1	<AC015660.1>	0	0	0	0	0	0	0	0	0	0	0	0	0	0	0	0	0	0	0	0	0	0	0	0	0	0	0	0	0	0	0	0	0	0	0	0	0	0	0	0	0	0	0	0	0	0	0
153	ENSG00000205148.1	<AC016251.1>	0	0	0	0	0	0	0	0	0	0	0	0	0	0	0	0	0	0	0	0	0	0	0	0	0	0	0	0	0	0	0	0	0	0	0	0	0	0	0	0	0	0	0	0	0	0	0
154	ENSG00000268012.1	<AC016559.1>	0	0	0	0	0	0	0	0	0	0	0	0	0	0	0	0	0	0	0	0	0	0	0	0	0	0	0	0	0	0	0	0	0	0	0	0	0	0	0	0	0	0	0	0	0	0	0
155	ENSG00000205147.3	<AC016586.1>	0	0	0	0	0	0	0	0	0	0	0	0	0	0	0	0	0	0	0	0	0	0	0	0	0	0	0	0	0	0	0	0	0	0	0	0	0	0	0	0	0	0	0	0	0	0	0
156	ENSG00000222005.4	<AC016722.1>	0.11	0.45	0.74	0.67	0.28	0	0.07	0.64	0.81	0.72	0.56	0.35	0.38	0.09	0.69	0.22	0.04	0.31	0.4	0.87	0.11	0.46	0.43	0.98	0	0	0.4	0.14	0.11	0.67	0.69	0.07	0.13	0.48	0	0.58	0.3	0.49	0.24	0	0.09	0.09	0.45	0.2	0.92	0.13	0.11
157	ENSG00000239332.1	<AC016722.2>	2.8	2.18	2.78	3.08	4.98	4.61	3.48	2.06	2.37	2.37	1.94	1.08	2.31	2.55	3.68	2.95	2.16	2.52	4.16	2.54	1.35	3.47	2.31	1.78	3.15	1.5	1.79	3.87	3.23	3.95	2.33	1.25	3.07	2.61	1.24	1.6	4.44	2.32	2.05	2.8	3.37	1.46	3.54	2.28	2.36	3.64	1.67
158	ENSG00000238091.1	<AC016745.1>	0	0	0	0	0	0	0	0	0	0	0	0	0	0	0	0	0	0	0	0	0	0	0	0	0	0	0	0	0	0	0	0	0	0	0	0	0	0	0	0	0	0	0	0	0	0	0
159	ENSG00000186235.6	<AC016757.3>	15.58	6.05	6.9	1.83	16.83	3.85	14.21	3.4	19.82	7.39	6.28	12.46	8.81	5.61	2.62	4.47	12.92	6.8	2.9	15.59	0.73	4.01	11.35	7.94	9.33	9.84	10.08	5.84	10.58	8.86	5.76	4.06	5.4	8.09	18.89	9.61	5.9	7.51	1.6	3.9	22.68	10.16	8.35	6.98	6.65	8.41	6.16
160	ENSG00000269679.1	<AC018445.1>	0	0	0	0	0	0	0	0	0	0	0	0	0	0	0	0	0	0	0	0	0	0	0	0	0	0	0	0	0	0	0	0	0	0	0	0	0	0	0	0	0	0	0	0	0	0	0
161	ENSG00000268241.1	<AC018470.1>	0	0	0	0	0	0	0	0	0	0	0	0	0	0	0	0	0	0	0	0	0	0	0	0	0	0	0	0	0	0	0	0	0	0	0	0	0	0	0	0	0	0	0	0	0	0	0
162	ENSG00000167765.3	<AC018755.1>	0	0	0	0	0	0	0	0	0	0	0	0	0	0	0	0	0	0	0	0	0	0	0	0	0	0	0	0	0	0	0	0	0	0	0	0	0	0	0	0	0	0	0	0	0	0	0
163	ENSG00000269210.1	<AC019171.1>	0	0	0	0	0	0	0	0	0	0	0	0	0	0	0	0	0	0	0	0	0	0	0	0	0	0	0	0	0	0	0	0	0	0	0	0	0	0	0	0	0	0	0	0	0	0	0
164	ENSG00000179066.6	<AC020907.1>	0	0	0	0	0	0	0	0	0	0	0	0	0	0	0	0	0	0	0	0	0	0	0	0	0	0	0	0	0	0	0	0	0	0	0	0	0	0	0	0	0	0	0	0	0	0	0
165	ENSG00000268953.1	<AC020952.1>	0	0	0	0	0	0	0	0	0	0	0	0	0	0	0	0	0	0	0	0	0	0	0	0	0	0	0	0	0	0	0	0	0	0	0	0	0	0	0	0	0	0	0	0	0	0	0
166	ENSG00000196355.2	<AC021860.1>	0	0	0	0	0	0	0	0	0	0	0	0	0	0	0	0	0	0	0	0	0	0	0	0	0	0	0	0	0	0	0	0	0	0	0	0	0	0	0	0	0	0	0	0	0	0	0
167	ENSG00000267964.1	<AC022400.2>	0	0	0	0	0	0	0	0	0	0	0	0	0	0	0	0	0	0	0	0	0	0	0	0	0	0	0	0	0	0	0	0	0	0	0	0	0	0	0	0	0	0	0	0	0	0	0
168	ENSG00000213132.2	<AC022498.1>	0	0	0	0	0	0	0	0	0	0	0	0	0	0	0	0	0	0	0	0	0	0	0	0	0	0	0	0	0	0	0	0	0	0	0	0	0	0	0	0	0	0	0	0	0	0	0
169	ENSG00000212997.1	<AC023632.1>	0	0	0	0	0	0	0	0	0	0	0	0	0	0	0	0	0	0	0	0	0	0	0	0	0	0	0	0	0	0	0	0	0	0	0	0	0	0	0	0	0	0	0	0	0	0	0
170	ENSG00000269282.1	<AC024257.1>	0	0	0	0	0	0	0	0	0	0	0	0	0	0	0	0	0	0	0	0	0	0	0	0	0	0	0	0	0	0	0	0	0	0	0	0	0	0	0	0	0	0	0	0	0	0	0
171	ENSG00000177340.4	<AC024940.1>	0	0	0	0	0	0	0	0	0	0	0	0	0	0	0	0	0	0	0	0	0	0	0	0	0	0	0	0	0	0	0	0	0	0	0	0	0	0	0	0	0	0	0	0	0	0	0
172	ENSG00000268028.1	<AC025262.1>	0	0	0	0	0	0	0	0	0	0	0	0	0	0	0	0	0	0	0	0	0	0	0	0	0	0	0	0	0	0	0	0	0	0	0	0	0	0	0	0	0	0	0	0	0	0	0
173	ENSG00000204752.3	<AC025278.1>	0	0	0	0	0	0	0	0	0	0	0	0	0	0	0	0	0	0	0	0	0	0	0	0	0	0	0	0	0	0	0	0	0	0	0	0	0	0	0	0	0	0	0	0	0	0	0
174	ENSG00000268509.1	<AC026202.1>	0	0	0	0	0	0	0	0	0	0	0	0	0	0	0	0	0	0	0	0	0	0	0	0	0	0	0	0	0	0	0	0	0	0	0	0	0	0	0	0	0	0	0	0	0	0	0
175	ENSG00000268885.1	<AC026740.1>	0	0	0	0	0	0	0	0	0	0	0	0	0	0	0	0	0	0	0	0	0	0	0	0	0	0	0	0	0	0	0	0	0	0	0	0	0	0	0	0	0	0	0	0	0	0	0
176	ENSG00000268838.1	<AC027228.1>	0	0	0	0	0	0	0	0	0	0	0	0	0	0	0	0	0	0	0	0	0	0	0	0	0	0	0	0	0	0	0	0	0	0	0	0	0	0	0	0	0	0	0	0	0	0	0
177	ENSG00000268798.1	<AC027307.3>	0	0	0	0	0	0	0	0	0	0	0	0	0	0	0	0	0	0	0	0	0	0	0	0	0	0	0	0	0	0	0	0	0	0	0	0	0	0	0	0	0	0	0	0	0	0	0
178	ENSG00000268553.1	<AC027309.1>	0	0	0	0	0	0	0	0	0	0	0	0	0	0	0	0	0	0	0	0	0	0	0	0	0	0	0	0	0	0	0	0	0	0	0	0	0	0	0	0	0	0	0	0	0	0	0
179	ENSG00000248235.2	<AC037459.4>	0.68	0	2.28	0.42	1.13	3.26	0.77	1.6	1.49	0.47	0	0.51	2.41	0.59	1.08	0.89	0.76	2.64	2.72	1.45	0.62	1.54	1.69	0.34	0.94	2	0	2.75	2.39	1.49	0.98	1.77	1.15	4.03	2.97	2.07	3.39	1.03	1.42	1.61	0	0	2.89	1.76	1.36	2.55	1.08
180	ENSG00000237102.2	<AC040160.1>	0	0	0	0	0	0	0	0	0	0	0	0	0	0	0	0	0	0	0	0	0	0	0	0	0	0	0	0	0	0	0	0	0	0	0	0	0	0	0	0	0	0	0	0	0	0	0
181	ENSG00000260415.3	<AC068987.1>	0	0	0	0	0	0	0	0	0	0	0	0	0	0	0	0	0	0	0	0	0	0	0	0	0	0	0	0	0	0	0	0	0	0	0	0	0	0	0	0	0	0	0	0	0	0	0
182	ENSG00000269165.1	<AC069547.1>	0	0	0	0	0	0	0	0	0	0	0	0	0	0	0	0	0	0	0	0	0	0	0	0	0	0	0	0	0	0	0	0	0	0	0	0	0	0	0	0	0	0	0	0	0	0	0
183	ENSG00000268170.1	<AC073342.1>	0	0	0	0	0	0	0	0	0	0	0	0	0	0	0	0	0	0	0	0	0	0	0	0	0	0	0	0	0	0	0	0	0	0	0	0	0	0	0	0	0	0	0	0	0	0	0
184	ENSG00000255863.1	<AC073610.5>	0	0	0	0	0	0	0	0	0	0	0	0	0	0	0	0	0	0	0	0	0	0	0	0	0	0	0	0	0	0	0	0	0	0	0	0	0	0	0	0	0	0	0	0	0	0	0
185	ENSG00000269657.1	<AC079210.1>	0	0	0	0	0	0	0	0	0	0	0	0	0	0	0	0	0	0	0	0	0	0	0	0	0	0	0	0	0	0	0	0	0	0	0	0	0	0	0	0	0	0	0	0	0	0	0
186	ENSG00000226757.1	<AC079341.1>	0	0	0	0	0	0	0	0	0	0	0	0	0	0	0	0	0	0	0	0	0	0	0	0	0	0	0	0	0	0	0	0	0	0	0	0	0	0	0	0	0	0	0	0	0	0	0
187	ENSG00000182329.6	<AC079354.1>	0.09	0.04	0.33	0.02	0.14	0.09	0.14	0.06	0.21	0.07	0	0	0.1	0	0.19	0.15	0.07	0	0.02	0.12	0.04	0.11	0.05	0.05	0.22	0	0.05	0.11	0.16	0	0.02	0.11	0.02	0.02	0.02	0.02	0.02	0.07	0.02	0.02	0.15	0.03	0.14	0.13	0	0.09	0.15
188	ENSG00000272214.1	<AC079602.1>	0	0	0	0	0	0	0	0	0	0	0	0	0	0	0	0	0	0	0	0	0	0	0	0	0	0	0	0	0	0	0	0	0	0	0	0	0	0	0	0	0	0	0	0	0	0	0
189	ENSG00000196758.3	<AC079612.1>	0	0	0	0	0	0	0	0	0	0	0	0	0	0	0	0	0	0	0	0	0	0	0	0	0	0	0	0	0	0	0	0	0	0	0	0	0	0	0	0	0	0	0	0	0	0	0
190	ENSG00000232941.1	<AC090186.1>	0	0	0	0	0	0	0	0	0	0	0	0	0	0	0	0	0	0	0	0	0	0	0	0	0	0	0	0	0	0	0	0	0	0	0	0	0	0	0	0	0	0	0	0	0	0	0
191	ENSG00000269197.1	<AC090574.1>	0	0	0	0	0	0	0	0	0	0	0	0	0	0	0	0	0	0	0	0	0	0	0	0	0	0	0	0	0	0	0	0	0	0	0	0	0	0	0	0	0	0	0	0	0	0	0
192	ENSG00000268960.1	<AC091150.1>	0	0	0	0	0	0	0	0	0	0	0	0	0	0	0	0	0	0	0	0	0	0	0	0	0	0	0	0	0	0	0	0	0	0	0	0	0	0	0	0	0	0	0	0	0	0	0
193	ENSG00000217455.4	<AC091801.1>	0	0	0	0	0	0	0	0.17	0	0.16	0	0	0.14	0	0	0	0	0	0	0	0.13	0	0	0.07	0	0.62	0	0	0	0	0.15	0.55	0	0	0	0	0.42	0	0.39	0.39	0	0	1.41	0	0	0	0.77
194	ENSG00000269049.1	<AC092291.2>	0	0	0	0	0	0	0	0	0	0	0	0	0	0	0	0	0	0	0	0	0	0	0	0	0	0	0	0	0	0	0	0	0	0	0	0	0	0	0	0	0	0	0	0	0	0	0
195	ENSG00000267819.1	<AC092850.1>	0	0	0	0	0	0	0	0	0	0	0	0	0	0	0	0	0	0	0	0	0	0	0	0	0	0	0	0	0	0	0	0	0	0	0	0	0	0	0	0	0	0	0	0	0	0	0
196	ENSG00000269175.1	<AC093157.1>	0	0	0	0	0	0	0	0	0	0	0	0	0	0	0	0	0	0	0	0	0	0	0	0	0	0	0	0	0	0	0	0	0	0	0	0	0	0	0	0	0	0	0	0	0	0	0
197	ENSG00000268791.1	<AC093323.1>	0	0	0	0	0	0	0	0	0	0	0	0	0	0	0	0	0	0	0	0	0	0	0	0	0	0	0	0	0	0	0	0	0	0	0	0	0	0	0	0	0	0	0	0	0	0	0
198	ENSG00000269559.1	<AC093677.1>	0	0	0	0	0	0	0	0	0	0	0	0	0	0	0	0	0	0	0	0	0	0	0	0	0	0	0	0	0	0	0	0	0	0	0	0	0	0	0	0	0	0	0	0	0	0	0
199	ENSG00000220256.3	<AC093802.1>	0	0	0	0	0	0	0	0	0	0	0	0	0	0	0	0	0	0	0	0	0	0	0	0	0	0	0	0	0	0	0	0	0	0	0	0	0	0	0	0	0	0	0	0	0	0	0
200	ENSG00000269690.1	<AC096677.1>	0	0	0	0	0	0	0	0	0	0	0	0	0	0	0	0	0	0	0	0	0	0	0	0	0	0	0	0	0	0	0	0	0	0	0	0	0	0	0	0	0	0	0	0	0	0	0
201	ENSG00000268626.1	<AC103809.2>	0	0	0	0	0	0	0	0	0	0	0	0	0	0	0	0	0	0	0	0	0	0	0	0	0	0	0	0	0	0	0	0	0	0	0	0	0	0	0	0	0	0	0	0	0	0	0
202	ENSG00000214919.2	<AC104472.1>	0	0	0	0	0	0	0	0	0	0	0	0	0	0	0	0	0	0	0	0	0	0	0	0	0	0	0	0	0	0	0	0	0	0	0	0	0	0	0	0	0	0	0	0	0	0	0
203	ENSG00000203392.2	<AC105020.1>	0	0	0	0	0	0	0	0	0	0	0	0	0	0	0	0	0	0	0	0	0	0	0	0	0	0	0	0	0	0	0	0	0	0	0	0	0	0	0	0	0	0	0	0	0	0	0
204	ENSG00000230493.2	<AC106017.1>	0	0	0	0	0	0	0	0	0	0	0	0	0	0	0	0	0	0	0	0	0	0	0	0	0	0	0	0	0	0	0	0	0	0	0	0	0	0	0	0	0	0	0	0	0	0	0
205	ENSG00000222001.2	<AC106876.2>	0	0	0	0	0	0	0	0	0	0	0	0	0	0	0	0	0	0	0	0	0	0	0	0	0	0	0	0	0	0	0	0	0	0	0	0	0	0	0	0	0	0	0	0	0	0	0
206	ENSG00000269302.1	<AC110771.1>	0	0	0	0	0	0	0	0	0	0	0	0	0	0	0	0	0	0	0	0	0	0	0	0	0	0	0	0	0	0	0	0	0	0	0	0	0	0	0	0	0	0	0	0	0	0	0
207	ENSG00000269506.1	<AC110792.1>	0	0	0	0	0	0	0	0	0	0	0	0	0	0	0	0	0	0	0	0	0	0	0	0	0	0	0	0	0	0	0	0	0	0	0	0	0	0	0	0	0	0	0	0	0	0	0
208	ENSG00000269360.1	<AC112693.2>	0	0	0	0	0	0	0	0	0	0	0	0	0	0	0	0	0	0	0	0	0	0	0	0	0	0	0	0	0	0	0	0	0	0	0	0	0	0	0	0	0	0	0	0	0	0	0
209	ENSG00000212768.2	<AC114546.1>	0	0	0	0	0	0	0	0	0	0	0	0	0	0	0	0	0	0	0	0	0	0	0	0	0	0	0	0	0	0	0	0	0	0	0	0	0	0	0	0	0	0	0	0	0	0	0
210	ENSG00000204620.2	<AC115618.1>	0	0	0	0	0	0	0	0	0	0	0	0	0	0	0	0	0	0	0	0	0	0	0	0	0	0	0	0	0	0	0	0	0	0	0	0	0	0	0	0	0	0	0	0	0	0	0
211	ENSG00000269402.1	<AC116407.2>	0	0	0	0	0	0	0	0	0	0	0	0	0	0	0	0	0	0	0	0	0	0	0	0	0	0	0	0	0	0	0	0	0	0	0	0	0	0	0	0	0	0	0	0	0	0	0
212	ENSG00000268175.1	<AC117395.1>	0	0	0	0	0	0	0	0	0	0	0	0	0	0	0	0	0	0	0	0	0	0	0	0	0	0	0	0	0	0	0	0	0	0	0	0	0	0	0	0	0	0	0	0	0	0	0
213	ENSG00000175911.4	<AC127496.1>	0	0	0	0	0	0	0	0	0	0	0	0	0	0	0	0	0	0	0	0	0	0	0	0	0	0	0	0	0	0	0	0	0	0	0	0	0	0	0	0	0	0	0	0	0	0	0
214	ENSG00000183562.2	<AC131971.1>	0	0	0	0	0	0	0	0	0	0	0	0	0	0	0	0	0	0	0	0	0	0	0	0	0	0	0	0	0	0	0	0	0	0	0	0	0	0	0	0	0	0	0	0	0	0	0
215	ENSG00000247270.2	<AC132186.1>	0	0	0	0	0	0	0	0	0	0	0	0	0	0	0	0	0	0	0	0	0	0	0	0	0	0	0	0	0	0	0	0	0	0	0	0	0	0	0	0	0	0	0	0	0	0	0
216	ENSG00000268403.1	<AC132192.1>	0	0	0	0	0	0	0	0	0	0	0	0	0	0	0	0	0	0	0	0	0	0	0	0	0	0	0	0	0	0	0	0	0	0	0	0	0	0	0	0	0	0	0	0	0	0	0
217	ENSG00000184566.2	<AC132216.1>	0	0	0	0	0	0	0	0	0	0	0	0	0	0	0	0	0	0	0	0	0	0	0	0	0	0	0	0	0	0	0	0	0	0	0	0	0	0	0	0	0	0	0	0	0	0	0
218	ENSG00000268852.1	<AC132872.2>	0	0	0	0	0	0	0	0	0	0	0	0	0	0	0	0	0	0	0	0	0	0	0	0	0	0	0	0	0	0	0	0	0	0	0	0	0	0	0	0	0	0	0	0	0	0	0
219	ENSG00000268863.1	<AC135048.1>	0	0	0	0	0	0	0	0	0	0	0	0	0	0	0	0	0	0	0	0	0	0	0	0	0	0	0	0	0	0	0	0	0	0	0	0	0	0	0	0	0	0	0	0	0	0	0
220	ENSG00000198150.2	<AC135178.1>	0	0	0	0	0	0	0	0	0	0	0	0	0	0	0	0	0	0	0	0	0	0	0	0	0	0	0	0	0	0	0	0	0	0	0	0	0	0	0	0	0	0	0	0	0	0	0
221	ENSG00000267950.1	<AC136297.1>	0	0	0	0	0	0	0	0	0	0	0	0	0	0	0	0	0	0	0	0	0	0	0	0	0	0	0	0	0	0	0	0	0	0	0	0	0	0	0	0	0	0	0	0	0	0	0
222	ENSG00000228259.2	<AC136604.1>	0	0	0	0	0	0	0	0	0	0	0	0	0	0	0	0.22	0	0	0	0	0	0	0	0	0	0	0	0	0	0	0	0	0	0	0	0	0	0	0.13	0	0	0	0	0	0	0	0
223	ENSG00000267824.1	<AC137056.1>	0	0	0	0	0	0	0	0	0	0	0	0	0	0	0	0	0	0	0	0	0	0	0	0	0	0	0	0	0	0	0	0	0	0	0	0	0	0	0	0	0	0	0	0	0	0	0
224	ENSG00000268218.1	<AC137932.1>	0	0	0	0	0	0	0	0	0	0	0	0	0	0	0	0	0	0	0	0	0	0	0	0	0	0	0	0	0	0	0	0	0	0	0	0	0	0	0	0	0	0	0	0	0	0	0
225	ENSG00000269563.1	<AC138655.1>	0	0	0	0	0	0	0	0	0	0	0	0	0	0	0	0	0	0	0	0	0	0	0	0	0	0	0	0	0	0	0	0	0	0	0	0	0	0	0	0	0	0	0	0	0	0	0
226	ENSG00000233812.2	<AC139426.2>	0	0	0	0	0	0	0	0	0	0	0	0	0	0	0	0	0	0	0	0	0	0	0	0	0	0	0	0	0	0	0	0	0	0	0	0	0	0	0	0	0	0	0	0	0	0	0
227	ENSG00000269529.1	<AC140061.12>	0	0	0	0	0	0	0	0	0	0	0	0	0	0	0	0	0	0	0	0	0	0	0	0	0	0	0	0	0	0	0	0	0	0	0	0	0	0	0	0	0	0	0	0	0	0	0
228	ENSG00000269396.1	<AC187652.1>	0	0	0	0	0	0	0	0	0	0	0	0	0	0	0	0	0	0	0	0	0	0	0	0	0	0	0	0	0	0	0	0	0	0	0	0	0	0	0	0	0	0	0	0	0	0	0
229	ENSG00000060971.13	<ACAA1>	176.55	160.15	166.78	181.87	167.8	150.78	179.55	149.51	186.69	169.52	180.18	152.7	178.77	166.03	174.92	141.95	183.82	183.38	160.31	159.57	159.85	148.17	171.66	180.38	148.15	166.44	188.57	153.14	164.52	155.26	131.68	148.73	156.05	194.14	211.46	160.07	133.73	168.85	170.5	181.3	167.57	207.32	162.95	163.84	203.1	157.32	136.87
230	ENSG00000167315.13	<ACAA2>	46.88	54.54	59.29	74.01	54.78	86.21	65.47	107.16	62.08	81.8	64.72	51.77	67.55	84.69	67.04	84.11	63.11	79	89	51.1	73.4	53.15	60.26	69.17	80.99	74.44	37.51	65.82	76.42	100.74	32.39	78.76	99.66	54.5	69.5	65.16	69.99	74.96	73.8	76.74	61.5	64.82	73.15	68.84	74.32	89.6	112.91
231	ENSG00000132142.15	<ACACA>	52.82	67.43	36.15	35.23	56.7	32.6	47.71	48.39	48.93	44.72	44.11	44.81	37.22	32.79	31.81	47.37	37.63	36.84	39.52	40.07	68.72	35.05	36.92	47.64	34.78	41.86	44.57	38.2	37.78	40.77	47.84	26.93	39.79	48.97	36.9	44.49	35.45	38.09	42.62	37.48	41.65	37.07	39.66	40.92	48.27	33.35	37.92
232	ENSG00000076555.11	<ACACB>	63.18	102.46	87.1	134.35	66.08	133.09	64.03	168.03	66.92	142.09	173.3	60.11	86.32	193.4	123.05	60.02	109.91	104.53	182.88	70.63	154.39	154.94	133	207.46	177.79	47.34	106.75	79.43	77.91	160.97	40.39	147.54	163.05	130.78	75.74	65.38	91.83	81.86	105.74	177.63	110.16	70.26	117.65	92.12	162.01	117.67	493.35
233	ENSG00000111271.10	<ACAD10>	30.56	22.61	31.91	16.03	21.18	22.96	24.3	14.72	28.47	24.09	20.97	30.43	31.68	34.11	16.34	13.07	25.22	15.11	19.37	27.27	19.87	23.17	20.88	20.37	25.3	20.4	22.38	29.71	26.3	19.64	17.81	23.24	14.02	35.87	41.99	24.86	24.88	19.34	14.46	25.46	27.47	41.03	26.1	16.89	22.62	12.89	24.25
234	ENSG00000240303.3	<ACAD11>	53.18	40.91	56	34.58	62.72	60.86	43.26	43.37	64.44	64.71	42.08	56.14	116.42	41.41	68.38	38.62	74.29	46.92	49.37	44.05	61.49	72.69	52.13	53.68	57.73	74.83	76.43	85.37	67.22	33.04	32.35	45.53	68.66	111.53	117.18	57.2	112.07	52.24	25.36	45.4	91.16	87.27	94.41	44.97	64.36	35.59	76.3
235	ENSG00000151498.7	<ACAD8>	39.11	54.73	49.13	50.79	45.47	63.33	32.53	55.19	57.95	51.17	50.99	53.47	58.1	50.02	45.3	46.74	42.58	46.97	48.07	54.97	33.88	41.72	56.28	45.14	37.86	39.35	59.5	52.47	49.73	39.48	39.89	39.37	51.78	66.28	80.02	37.35	57.92	43.72	21.93	45.75	64.66	71.19	60.72	54.56	59.47	38.34	55.95
236	ENSG00000177646.13	<ACAD9>	29.05	23.35	29.28	27.12	26.91	25.93	19.94	19.25	35.35	29.59	29.12	23.7	28.39	26.13	28.1	17.52	20.62	25.63	21.71	47.19	21.75	26.42	20.43	26.41	22.33	19.98	27.57	25.91	33.4	27.17	27.21	25.27	17.67	35.77	20.31	25.19	41.99	26.14	16.56	30.04	33.73	34.66	38.3	29.59	27.28	25.27	25.03
237	ENSG00000115361.3	<ACADL>	27.33	64.35	32.93	68.36	20.47	27.94	12.79	32.61	24.11	41.45	37.89	16.45	26.33	55.98	41.94	14.71	44.2	59.32	51.53	12.82	54.33	58.52	25.1	85.59	37.68	19.5	24.25	25.1	22.06	60.14	9.58	25.82	59.3	47.19	30.56	17.79	47.35	20.44	35.54	47.37	11.33	17.23	25.6	79.65	104.55	70.4	48.6
238	ENSG00000117054.9	<ACADM>	88.3	50.27	46	48.04	58.84	58.28	63.42	39.88	72.41	62.97	35.16	80.08	60.54	82.82	49.74	34.47	54.03	54.77	46.25	63.12	58.24	45.86	64.87	51.09	69.46	54.56	37.67	81.23	41.82	54.21	36.59	50.01	63.85	60.28	63.32	79.01	64.22	46.21	71.09	60.06	61.33	56.8	70.83	57.92	54.95	75.42	51.19
239	ENSG00000122971.4	<ACADS>	6.46	4	6.18	5.1	8.75	7.58	6.03	5.25	9.94	6.91	5.7	4.89	5.28	7.91	6.54	3.91	5.18	3.94	6.53	8.53	4.86	10.95	6.25	4.95	8.65	7.48	8.24	4.61	5.26	4.82	4.31	5.47	7.45	6.01	18.58	8.94	5.72	6.59	4.48	5.77	6.15	11.9	6.22	6.56	6.52	6.53	11.25
240	ENSG00000196177.8	<ACADSB>	9.14	9.97	12.08	12.2	12.2	16.24	10.77	12.18	12.17	15.15	7.17	17.39	18.36	12.7	20.19	8.47	9.69	11.13	18.08	19.47	12.49	19.38	19.97	15.38	17.64	12.66	15.21	12.88	12.66	10.18	1.11	8.81	15.55	21.86	8.89	8.34	15.12	13.47	8.32	11.28	20.18	12.84	16.29	11.05	17.3	14.35	13.31
241	ENSG00000072778.15	<ACADVL>	731.25	785.33	943.67	975.62	881.54	1029.17	1001.71	1846.46	1156.08	1248.04	1061.44	1008.31	1630.07	1097.67	1231.57	1456.74	1049.92	723.34	1472.74	1238.49	796.65	764.09	1199.25	946.43	1061.22	1405.84	1393.9	1002.52	1115.7	1291.55	1709.61	956.53	1189.05	1115.08	1358.34	981.79	1182.52	1380.96	509.44	1169.35	1630.57	2615.62	1492.04	1321.31	1233.63	871.27	1615.67
242	ENSG00000157766.11	<ACAN>	3.81	2.5	8.05	8.9	10.53	3.94	8.61	8.1	1.78	2.34	3.99	5.14	5.09	0.81	6.08	2.95	2.09	3.43	0.56	6.02	3.35	16.68	9.1	1.45	5.1	1.59	3.2	3.82	12.56	0.22	12.45	6.67	1.62	0.93	7.41	8.16	14.16	5.42	3.6	8.46	17.02	2.5	5.72	3.6	0.99	4.84	3.7
243	ENSG00000072818.7	<ACAP1>	34.6	29.58	35.18	33.93	32.92	51.02	43.46	30.15	37.36	27.92	31.19	22.18	35.52	29.69	32.98	39.08	24.45	46.72	33.27	31.3	21.93	26.72	24.18	31.99	23.84	32.64	37.04	30.1	39.41	48.88	15.77	39.34	19.88	36.11	23.61	46.13	26.11	78.08	46.78	41.43	39.26	39.87	26.19	23.7	44.38	32.63	21.88
244	ENSG00000114331.8	<ACAP2>	5.21	2.27	4.73	3.56	3.96	3.08	1.48	3.62	4.1	3.74	3.92	7.99	4.11	7.82	2.4	4.1	2.22	6.34	4.43	1.73	1.31	3.86	2.56	5.26	3.15	0.48	3.69	2.31	5.42	2.05	1.09	2.54	2.03	4.09	4.83	4.23	6.35	1.29	1.38	3.99	1.91	2.63	4.27	4.55	3.58	3.86	4.49
245	ENSG00000131584.14	<ACAP3>	151.25	137.12	199.53	104.46	111.37	174.58	142.36	98.8	236.71	128.29	120.85	184.23	178.28	99.74	124.29	59.24	141.33	101.34	110.83	189.63	145.34	78.08	95.97	123.06	110.56	225.36	172.94	228.29	156.59	77.01	109.03	101.4	79.1	233.64	200.83	176.92	161.54	137.27	72.45	119.41	229.02	297.25	256.52	122.88	141.1	89.25	129.23
246	ENSG00000075239.9	<ACAT1>	26.86	19.77	42.25	36.82	43.48	30.45	19.52	26.34	24.22	41.2	17.3	34.65	39.51	30.16	32.08	22.82	21.7	29.8	39.73	30.11	32.66	49.63	51.24	34.15	40.29	14.4	46	44	37.82	31.62	22.65	42.12	22.91	52.77	67.06	21.5	22.62	52.69	15.9	32.45	52.3	59.95	45.48	25.41	46.19	26.21	29.84
247	ENSG00000120437.7	<ACAT2>	69.86	110.22	33.73	59.06	85.97	34.6	47.48	42.02	36.42	48.38	57.75	44.02	32.34	43.04	48.79	32.36	44.62	95.37	49.08	33.43	62.51	44.82	50.01	49.26	40.31	42.08	38.11	36.48	34.25	71.45	35.72	72.57	41.98	50.68	32.95	51.73	34.94	42.45	53.35	64.44	26.79	19.99	33.02	58.74	53.62	97.46	25.44
248	ENSG00000182827.8	<ACBD3>	0	1.12	2.1	2.5	0	0	2.76	1.6	2.29	0.76	0	6.03	1.22	1.67	0.42	9.64	0	5.03	0	0	1.04	0	3	0	2.47	0	0	0	0	3.22	0	0	4.2	0	4.31	2.51	1.47	2.67	0	3.17	0	0	0	3.25	0	2.51	0
249	ENSG00000181513.10	<ACBD4>	57.42	32.1	96.73	37.58	55.99	65.87	49.03	36.71	79.81	49.29	41.46	48.19	61.45	50.88	54.25	19.27	58.65	40.62	46.1	55.49	34.8	53.2	44.91	46.28	45.46	53.2	43.45	71.49	50.44	52.57	30.12	36.83	54.21	65.12	33.58	54.23	57.06	71.46	38.17	49.48	62.24	82.42	71.67	53.37	72.04	50.89	32.81
250	ENSG00000107897.14	<ACBD5>	41.96	27.01	24.07	24.23	32.95	28.94	28.1	23.96	30.76	27.44	19.3	45.2	23.3	32.35	24.21	18.28	27.53	31.37	27.57	31.44	24.97	26.79	28.75	27.64	31.39	31.06	22.08	27.77	23.95	32.61	14.57	30.03	31.21	27.32	29.49	30.81	27.75	24.67	24.43	29.98	20.79	27.37	26.66	30.32	24.16	27.8	22.32
251	ENSG00000135847.5	<ACBD6>	1.74	4.86	10.29	14.53	19.82	11.04	8.01	12.46	2.32	16.84	14.34	16.19	9.03	24.24	8.56	9.4	14.23	15.07	6.68	8.25	5.17	11	7.07	17.43	8.22	3.34	11.03	4.19	12.22	9.42	1.05	14.45	20.46	12.32	16.52	10.76	4.58	5.94	21.43	6.73	4.64	9.37	6.2	9.59	6.97	10.56	12.98
252	ENSG00000176244.6	<ACBD7>	0	0	0	0	0	0	0	0	0.47	0	0	0	0	0	0	0	0	0	0	0	0	0	0	0.25	0.54	0	0	0	0	0	0.09	0	0	0	0	0	0	0	0	0	0.7	1.21	0	0	0	0.63	0
253	ENSG00000110455.9	<ACCS>	81.48	46.15	119.12	92.68	111.51	130.51	68.3	56.77	123.52	100.84	65.14	86.35	70.88	87.83	69.86	36.09	102.26	48.21	87.98	113.77	66.75	115.75	74.49	148.95	124.04	61.74	95.54	68.86	97.34	88.82	20.35	74.58	50.76	118.32	32.04	85.06	106.19	133.18	38.89	65.96	103.58	121.91	115.54	67.63	139.09	82.21	116.43
254	ENSG00000205126.2	<ACCSL>	0.09	0	0	0.07	0	0	0	0.07	0	0.05	0	0	0	0	0.07	0	0.04	0	0	0.09	0	0	0	0	0	0	0	0.12	0.04	0	0	0	0	0	0	0	0	0	0	0.09	0	0	0	0	0	0	0
255	ENSG00000102977.9	<ACD>	66.2	59.25	84.54	63.97	41.28	69.62	72.67	56.46	76.22	68.04	64.43	76.71	85.98	64.16	66.93	56.6	69.67	67.01	66.11	74.4	48.57	50.69	77.46	61.63	61.93	65.99	78.88	65.39	65.37	46.5	72.01	78.19	66.66	71.05	78.16	67.16	57.44	59.87	62.96	51.34	68.47	91.49	63.86	61.89	56.65	57.1	59.67
256	ENSG00000159640.10	<ACE>	8.37	5.2	11.17	7.08	3.08	27.94	10.3	6.89	15.3	6.04	7.01	5.95	7.11	14.38	4.01	2.42	6.8	3.56	5.01	8.96	4.23	6.12	3.29	5.82	4.11	16.29	8.45	13.38	14.17	3.93	6.19	4.77	5.29	5.53	3.7	12.6	16.41	21.55	9.15	3.78	23.21	7.25	26.43	4.55	3.92	4.4	8.19
257	ENSG00000130234.6	<ACE2>	0.31	0.5	0	0	0.18	0.04	0.04	0.22	0.25	0.11	0.04	0.12	0.45	0	0	0.22	0.61	0.17	2.14	0	0.47	0.42	0.39	0.73	0.2	1.1	0.35	0.3	0.18	0	0	0.18	0.58	0	0	0.15	0.26	0.49	0.11	0.2	0	0	0.26	0	0	0.39	2.2
258	ENSG00000167769.4	<ACER1>	0	0	0	0	0	0	0	0	0	0	0	0	0	0	0	0	0	0	0	0	0	0	0	0	0	0	0	0	0	0	0	0	0	0	0	0	0	0	0	0	0	0	0	0	0	0	0
259	ENSG00000177076.4	<ACER2>	1.72	0.22	0.3	0.47	1.07	0.38	0.59	0.48	0	0.7	0.44	0.9	0.69	1.16	0.3	0.55	0.92	0.59	0	1.47	0	0.46	0.59	0.51	0.94	0	0.98	0.6	0.14	0.91	0.38	0.77	0.62	0	1.34	0.65	1.33	0.63	0.2	1.28	1.23	0.24	1.12	0.13	0	0.5	1.47
260	ENSG00000078124.7	<ACER3>	38.1	19.25	21.58	15.94	36.37	20.09	25.31	19.55	27.23	22.81	20.51	42.3	27.05	23.45	27.34	23.28	24.12	25.87	28.23	38.36	20.18	24.74	28.34	22.58	30.72	30.02	21.55	24.21	20.88	28.48	15.36	23.91	22.65	31.74	30.76	25.7	29.48	19.69	16.67	29.13	33.28	21.49	24.83	28.09	24.99	23.15	20.4
261	ENSG00000087085.9	<ACHE>	1.24	1.15	1.98	1.16	2.39	4.21	9.83	2.52	2.74	0.43	0.38	1.52	2.44	2.7	3.34	3.12	1.24	1.81	1.45	2.46	1.64	3.24	0.75	1.29	1.62	1.61	2.53	1.19	3.1	1.18	1.2	1.22	1.42	2.4	1.34	1.56	1.75	1.74	1.38	0.37	4.04	1.07	2.72	3.83	1.19	0.59	1.19
262	ENSG00000100813.10	<ACIN1>	287.05	276.01	323.16	272.91	287.95	293.1	281.36	264.48	347.92	296.75	259.91	309.21	385.93	273.34	245.4	292.87	267.98	248.33	223.94	334.39	257.4	238.12	322.76	299.87	258.37	294.83	375.83	339.92	318.09	199.78	310.82	258.46	253.98	379.15	471.27	286.58	316.97	277.89	204.62	240.08	365.05	486.3	349.48	247.24	325.51	221.86	330.46
263	ENSG00000144648.10	<ACKR2>	21.2	49.04	22.13	25.28	11.46	41.2	20.57	20.17	25.24	25.56	20.28	13.15	15.85	25.34	15.65	14.12	23.24	41.52	15.1	7.18	36.15	24.92	11.19	36.71	23.53	14.09	12.65	25.93	20.49	22.02	18.85	20.5	31.81	15.69	16.5	24.05	27.86	13.3	24.54	18.98	11.2	6.68	21.64	39.03	40.64	22.5	46.5
264	ENSG00000144476.5	<ACKR3>	31.82	30.34	38.53	34.45	23.59	88.6	60.79	51.61	48.1	50.66	32.84	31.54	34.06	19.5	18.43	23.22	33.7	49.46	14.61	24.5	12.89	22.92	16.75	27.71	30.22	9.53	10.43	38.15	28.5	52.39	9.75	21.18	28.33	19.21	9.93	72.26	15.05	17.9	75.9	33.49	30.73	9.74	47.64	20.51	45.68	12.79	50.09
265	ENSG00000129048.6	<ACKR4>	0	0	0	0	0.6	0	0	0	0	0.47	0	0	0	0	0	0	0	0	0	0	0.36	0	0	0	0	0	0	0	0	0	0	0	0	0	0	0	0	0	0.3	0	0	0	0	0	0	0	0
266	ENSG00000131473.12	<ACLY>	51.1	53.36	36.3	42	56.93	45.18	45.86	44.95	30.2	37.06	31.21	29.44	19.96	44.14	30.31	30.66	31.23	40.69	34.49	24.47	80.63	36.57	31.32	44.18	25.39	25.84	17.7	44.77	32.63	37.9	49.79	27.56	33.57	46.77	30.16	39.57	30.6	35.01	28.88	46.88	35.45	19.47	42.65	34.03	31.09	30.08	56.89
267	ENSG00000153086.9	<ACMSD>	0.5	0.45	0.75	0.04	0.39	0.29	0.77	0.11	0.69	0.7	0.51	0.21	0.57	0.44	0.57	0.22	0.4	0.17	0.27	1.63	0.2	0.9	0.57	0.34	0.47	0.07	0.37	0.35	0.3	0.15	0.11	0.74	0.11	1	0.05	0.4	0.42	0.3	0.04	0.22	0.75	0.33	0.16	0.17	0.39	0.15	0.22
268	ENSG00000196636.7	<ACN9>	22.37	21.12	15.68	18.4	21.03	19.84	19.6	12.47	24.96	15.56	14.63	23.8	15.95	24.22	13.86	12.98	20.26	16.46	21.8	23.46	26.88	12.33	15.65	20.04	16.88	23.22	25.13	12.45	17.78	25.86	30.58	19.58	16.15	16.67	21.64	22.41	18.22	17.83	11.01	15.86	14.35	24.71	16.52	23.24	18.54	9.76	15.91
269	ENSG00000122729.14	<ACO1>	29.73	46.94	35.36	40.04	30.82	42.18	37.14	45.16	47.06	36	46.53	37.18	30.77	46.62	31.88	51.75	34.04	38.06	45.78	37.08	93.65	32.49	29.01	65.18	39.15	42	29.19	41.16	38.01	40.17	54.98	36.22	35.03	40.78	31.12	52.29	41.21	48.01	38.39	61.82	47.67	32.87	39.55	38.47	50.68	37.92	80.82
270	ENSG00000100412.11	<ACO2>	3.72	5.62	3.19	4.16	27.74	5.47	6.25	5.73	4.54	10.15	8.99	5	21.1	6.4	3.57	5.46	5.32	3.48	4.36	7.73	10.25	7.69	8.74	7.33	3.87	4.95	5.71	11.25	4.72	6.62	19.24	9.73	4.89	10.63	6.7	6.29	4.18	4.97	2.73	8.11	5.04	8.73	10.19	7.39	6.45	3.33	8.5
271	ENSG00000184227.3	<ACOT1>	2.69	0	0.75	0	0	1.31	1.15	1.07	0	1.91	3.67	0.65	0	5.1	0	2.18	0	4.28	0.45	0	3.5	0.35	0.73	0	0	3.83	0.68	2.84	0.38	0.69	2.1	0.87	0	0	0	2.76	0	0	0.24	1.6	0	0	0	2.54	1.54	1.81	0
272	ENSG00000162390.13	<ACOT11>	2.06	2.92	5.65	3.64	2.25	3.94	2.43	3.56	2.85	2.52	4.1	2.39	3.67	5.43	2.83	3.38	2.58	3.32	6.48	3.03	0.53	4.65	1.58	6.09	2.09	3.35	5.71	2.89	5.72	3.04	0.83	2.49	3.07	4.6	2.78	3.53	3.85	4.27	2.14	5.19	3.25	8.37	3.8	4.5	3.3	2.27	3.43
273	ENSG00000172497.4	<ACOT12>	0.31	0	0	0	0	0.39	0.38	0	0.62	0.58	0.2	0	0.29	0	0.32	0	0.34	0.28	0.27	0	0	0.07	0	0.18	0.22	0	0.54	0.21	0.07	0.27	0	0	0.29	0.59	0	0.02	0.19	0	0.09	0.09	0	0.14	0	0	0.09	0	0.2
274	ENSG00000112304.6	<ACOT13>	16.82	20.22	20.92	15.27	6.74	28.49	21.47	16.13	27.44	14.63	14.65	21.27	12.61	23.63	13.6	14.55	24.81	18.37	23.23	18.86	19.85	11.76	20.95	22.11	17.78	32.2	18.18	23.53	18.58	16.13	23.83	20.09	15.15	18.73	27.53	30.66	13.51	22.91	16.93	17.48	17.72	22.95	16.54	14.25	14.66	14.33	18.75
275	ENSG00000119673.10	<ACOT2>	3.05	12.15	14.39	6.51	8.96	6.77	13.85	6.15	16	10.67	8.77	7.03	10.93	18.79	5.96	11.02	13.31	18.06	4.72	12.13	11.64	7.8	4.67	16.72	14.05	11	14.17	9.4	22.67	10.57	5.53	12.5	17.52	11.3	6.29	8.72	9.47	18.37	10.42	9.28	14.03	17.16	9.46	8.01	20.85	9.02	11.16
276	ENSG00000177465.4	<ACOT4>	0	0	0	0	0	0	0	0	0	0	0	0	0	0	0	0	0	0	0	0	0	0	0	0	0	0	0	0	0	0	0	0	0	0	0	0	0	0	0	0	0	0	0	0	0	0	0
277	ENSG00000205669.2	<ACOT6>	0	0	0	0	0.19	0	0	0	0.26	0	0	0	0	0.2	0	0	0	0.09	0	0	0	0.69	0	0	0	0	0	0.14	0.23	0.4	0	0	0	0	0.14	0.11	0	0	0	0	0.19	0	0	0	0	0.13	0
278	ENSG00000097021.15	<ACOT7>	74.89	61.5	43.24	67.01	42.95	34.93	51.66	53.7	35.81	61.82	79.8	48.68	47.69	56	47.04	72.65	68.47	75.96	83.13	66.96	48.96	42.96	52.18	54.03	47.46	80.91	53.67	39.97	48.99	81.7	86.79	41.82	66.62	57.16	61.65	50.31	45.76	44.57	61.46	69.89	44.16	31.76	41.87	97.54	74.25	57.18	65.02
279	ENSG00000101473.12	<ACOT8>	30.31	29.92	37.32	39.59	41.61	29.08	39.88	33.93	44.51	41.95	41.05	35.55	42.21	42.58	42.74	20.88	41.22	44.32	50.55	32.25	33.31	49.1	33.77	39.19	35.15	47.48	28.8	44.72	43.07	46.46	33.77	31.83	39.08	47.55	52.69	37.68	31.95	44.83	35.5	53.69	39.01	50.05	42.32	39.49	47.38	43.57	30.83
280	ENSG00000123130.12	<ACOT9>	60.83	76.19	56.49	66.86	68.21	77.88	44.79	72.53	79.53	61.08	75.54	59.74	72.24	68.6	64.31	55.42	50.52	77.9	57.14	67.74	70.23	61.46	54.06	81.38	64.24	58.92	65.95	70.44	58.55	63.97	59.86	66.12	54.37	75.13	58.09	60.21	84.76	68.39	54.77	66.48	76.77	57.76	82.17	62.3	60.89	62.15	81.92
281	ENSG00000161533.7	<ACOX1>	13.68	6.57	8.35	13.08	7.04	21.13	14.43	10.89	15.25	10.54	18.81	14.21	5.68	14.82	9.83	12.04	11.11	14.52	14.52	12.3	9.2	19.98	6.06	14.62	11.84	11.09	7.32	7.66	8.59	12.46	6.06	8.28	15.2	11.61	13.46	12.76	10.74	16.61	18.9	18.18	14.04	6.73	6.01	6.61	10.55	18.87	14.08
282	ENSG00000168306.8	<ACOX2>	62.05	42.09	62.79	38.36	90.33	67.29	75.05	34.45	105.28	50.32	34.46	72.01	80.42	61.02	93.7	16.93	63.65	45.52	35.96	87.02	50.7	69.56	73.11	64.31	60.58	79.21	56.92	87.28	70.98	48.64	25.26	43.19	59.37	89.48	88.61	77.53	85.63	74.94	27.79	49.83	100.05	80.06	85.61	57.31	50.98	46.23	38.71
283	ENSG00000087008.11	<ACOX3>	22.3	10.66	17.33	8.72	10.09	31	17.43	10.49	20.6	13.22	11.64	14.75	16.06	20.88	18.18	17.93	12.32	13.16	12.18	14.02	13.84	24.74	14.04	16.05	14.07	14.66	19.48	15.39	13.83	12.18	12.1	16.98	9.03	16.45	8.94	16.3	15.52	19.5	13.92	24.62	23.02	16.96	20.06	7.69	20.63	12.05	10.12
284	ENSG00000153093.14	<ACOXL>	0.07	0.04	0.18	0	0.07	0.36	0.04	0.04	0.16	0.18	0.09	0.12	0.36	0	0.12	0.11	0.2	0.13	0.11	0.1	0	0.19	0.09	0.16	0.23	0.11	0.07	0.26	0.13	0.16	0	0.29	0.2	0.07	0.14	0.18	0.19	0	0.07	0.11	0.1	0.09	0	0.24	0.27	0.37	0.22
285	ENSG00000143727.11	<ACP1>	64.98	63.2	70.17	56.22	106	80.87	58.75	71.34	88.47	58.36	64.68	87.54	87.73	91.37	105.34	62.64	77.52	67.73	107.33	82.74	64.71	98.9	67.46	81.72	80.18	55.2	81.91	80.37	80.35	72.92	56.43	74.95	82.21	83.7	98.55	61.07	83.29	59.87	51.91	61.36	85.89	75.19	104.98	88.27	78.97	88.14	66.23
286	ENSG00000134575.5	<ACP2>	6.91	9.79	8.68	13.35	14.49	8.66	10.73	11.45	11.1	11.28	13.89	15	12.56	13.43	14.5	11.87	12.34	11.55	13.83	11.63	4.95	14.15	8.51	11.59	7.57	4.71	6.69	20.88	8.27	14.28	4.86	10.49	10.42	15.27	16.88	10.23	12.13	11.15	8.59	12.3	10.19	19.51	17.27	10.92	26.68	20.17	6.67
287	ENSG00000102575.6	<ACP5>	4.74	8.5	9	3.75	4.66	8.85	3.76	3.53	7.16	5.47	5.77	1.48	16.95	7.69	12.64	5.7	4.42	2.97	5.97	6.51	13.11	5.96	1.49	7.47	2.23	11.73	1.67	3.47	2.64	7.84	4.29	5.05	3.07	5.11	3.88	8.8	4.76	11.67	7.63	7.25	7.36	2.03	14.03	4.72	5.67	12.53	18.75
288	ENSG00000162836.7	<ACP6>	39.32	40.35	61.49	34.38	55.8	43.78	34.92	28.55	59.04	36.02	41.86	53.5	59.08	41.83	45.64	39.93	47.41	44.23	58.52	71.67	19.36	54.33	32.19	48.12	50.02	40.85	44.8	40.9	56.38	30.93	80.43	47.93	47.78	68.34	28.93	50.05	45.25	50.18	28.82	42.23	75.03	73.96	57.85	44.15	42.44	31.24	39.42
289	ENSG00000155893.7	<ACPL2>	5.73	12.71	9.21	6.53	10.88	11.52	10.21	11.04	11.7	8.19	4.12	7.33	9.55	11.8	9.57	4.38	6.73	9.42	12.31	19.05	5.86	11.55	10.5	8.78	7.21	8.92	6.85	11.89	11.01	6.26	7.05	8.68	10.29	8.09	15.98	13.96	9.89	9.29	8.28	10.59	14.76	16.08	15.86	11.05	9.39	14.03	9.95
290	ENSG00000014257.11	<ACPP>	0.56	0.4	0.91	0.65	1.64	0.27	1.64	1.45	0.46	0.59	1.6	1.06	0.41	1.32	0.8	0.09	0.76	0.04	0.44	0	0.35	0.14	0.27	0.58	0.34	0.93	0.21	1.54	1.02	0.16	2.19	0.26	0.88	0.43	0.22	0.45	0.45	0.84	0.46	0.56	0.61	2.05	0.54	1.34	1.45	0.31	1.78
291	ENSG00000142513.4	<ACPT>	0	0	0	0	0	0	0	0	0	0	0	0	0	0	0	0	0	0	0	0	0	0	0	0	0	0	0	0	0	0	0	0	0	0	0	0	0	0	0	0	0	0	0	0	0	0.11	0
292	ENSG00000100312.6	<ACR>	2.59	0	0.65	0.85	4.58	3.32	1.13	3.34	0.39	1.1	1.62	0	0.96	1.94	1.01	1.2	1.79	1.27	5.3	1.56	0.62	6.99	2.04	2.74	3.06	1.41	0.86	3.17	1.49	0.62	0.62	2.45	2.06	1.31	0.33	1.33	1.75	3.83	0.39	1.06	2.42	0	8.85	2.34	3.39	4.68	1.59
293	ENSG00000111644.3	<ACRBP>	3.7	2.09	3.97	2.68	1.74	4.12	5.55	1.56	4.96	2.95	0.53	2.19	11.75	7.47	2.39	0.13	4.46	1.35	2.81	1.73	2.62	2.88	2.04	3.19	4.61	2.51	2.86	2.16	7.88	1.78	0.81	0.7	2.04	3.13	6.39	1.85	2.73	2.86	4.98	3.15	4.67	11.52	5.12	3.05	1.42	2.68	1.1
294	ENSG00000147174.7	<ACRC>	8.19	6.28	10.57	6.88	8.91	12.53	5.73	9.5	15.04	8.69	8.79	10.07	10.6	8.79	9.25	5.32	9.58	8.94	6.23	12.44	9.16	7.48	11.74	12.89	14.27	9.57	13.77	10.64	9.51	8.04	11.51	7.93	7.96	12.54	26.38	5.87	15.96	8.47	5	8.53	12.83	15.62	12.32	11.09	11.98	6.64	6.84
295	ENSG00000134940.9	<ACRV1>	0.38	0.18	0	0.2	0.21	0.22	0	0	0.04	0	0.18	0.3	0.31	0.61	0.18	0.65	0.09	0.09	0	0	0.15	0.21	0.32	0	0.2	0	0	0	0.34	0.15	0.32	0	0	0.45	0.15	0	0	0.24	0.13	0.26	0.2	0	0	0	0	0.15	0.42
296	ENSG00000103740.5	<ACSBG1>	0.04	0	0.82	0.47	1.48	0.39	0.52	0.88	1.11	0.09	0	1.34	0.07	0.51	0.14	0.54	0	0.11	2.38	0.1	0.44	0.21	1.07	0	0	0.29	0.49	0.18	2.1	0.15	0.26	0.83	0	0	0.21	1.65	0.42	0	0.02	0	1.74	0.64	0.19	1.11	0.97	0.22	0
297	ENSG00000130377.9	<ACSBG2>	0.72	0.43	0.77	0.6	0.6	1.08	0.4	0.66	0.72	0	0	0.14	0.26	0.4	0.18	0.26	0.09	0.35	0.54	0.43	0.16	0.48	0.55	0.18	0.52	0.24	0.35	1.33	0.34	1.16	0	0	0.29	1.36	0.58	1.24	1.94	0.45	0.28	0.32	2.64	0	0.73	0.06	0.3	1.07	0.75
298	ENSG00000167107.8	<ACSF2>	40.76	32.95	48.19	41.09	38.36	92.68	49.46	36.71	75.03	53.25	36.42	46.65	66.03	70.2	69.09	27.51	34.08	37.34	48.45	59.25	37.35	64.43	59.07	53.12	64	45.78	60.31	62.53	57.06	46.35	20.65	39.21	39.72	53.25	63.49	53.87	70.88	58.11	49.48	33.97	71	57.87	78.97	33.45	39.67	48.27	53
299	ENSG00000176715.11	<ACSF3>	50.94	39.68	44.39	43.66	43.35	47.31	49.17	35.35	38.29	39.8	55.42	40.02	44.83	44.27	46.47	37.68	44.53	39.7	48.34	52.05	39.07	34.42	50.87	47.48	43.07	32.09	36.72	39.49	49.89	37.08	53.48	45.34	44.3	45.53	46.16	42.82	34.14	42.48	36.77	48.98	49.37	43.04	47.83	40.2	56.51	39.88	51
300	ENSG00000151726.9	<ACSL1>	145.36	209.28	71	64.24	91.14	109.58	73.09	184.84	88.29	101.27	160.35	121.69	95.44	107.99	151.28	169.83	113.33	102.83	148.19	144.6	444.21	70.57	133.16	236.32	159.99	148.63	164.28	83.83	61.01	171.01	161.91	114.5	142.07	124.83	239.24	71.95	149.53	110.11	83.35	140.99	149.22	73.86	128.56	146.26	163	119.81	294.54
301	ENSG00000123983.9	<ACSL3>	24.74	53.63	30.47	27.49	48.39	48.06	31.48	40.78	38.11	29.59	43.02	27.39	26.12	33.8	36.18	38.45	23.83	28.88	42.6	22.67	41.98	47.36	28.44	32.7	27.98	22.03	27.49	22.96	28.42	44.59	89.35	36.33	26.47	34.87	15.52	26.15	28.47	31.77	22.57	34.01	30.39	13.46	33.66	54.76	43.04	40.47	43.67
302	ENSG00000068366.15	<ACSL4>	17.87	19.37	14.95	16.12	20.86	22.62	19.67	23.31	22.07	17.68	17.21	20.82	18.67	28.02	17.86	50.47	15.01	17.97	25.19	17.55	20.78	20.62	16.88	20	20.05	20.89	19.27	15.97	19.03	21.08	29.44	16.29	21.35	17.9	20.01	21.5	21.57	17.72	14.37	23.47	21.93	20.21	24.99	18.97	21.5	17.51	30.94
303	ENSG00000197142.6	<ACSL5>	14.02	11.65	4.57	7.06	11.86	14.87	6.74	17.34	10.32	11.6	9.17	12.3	8.29	18.13	15.21	15.34	14.38	14.34	17.5	9.43	8.58	12.82	13.01	16.61	10.5	15.19	7.6	8.61	7.41	15.68	21.7	2.88	13.07	10.89	14.16	11.69	11.72	12.44	6.09	2.65	16.45	12.52	13.94	10.87	14.62	4.2	24.71
304	ENSG00000164398.8	<ACSL6>	0.41	0.36	1.05	0.94	1.04	0.84	0.59	0.29	0.63	0.54	0.24	0.3	0.83	0.28	0.23	0.37	0.38	0.79	0.34	1.56	0.22	0.9	0.34	0.24	0.27	0.09	0.47	0.25	0.34	0.44	0.06	0.39	0.16	0.24	0.36	0.22	0.54	1.25	0.26	0.33	1.7	0.64	0.3	0.41	1.42	0.67	0.66
305	ENSG00000166743.5	<ACSM1>	0.4	0.32	1.44	0.42	0.77	0.38	1.08	0.04	1.04	0.74	0.33	0.37	1.88	3.49	0.39	0.3	0.2	0.53	0.27	0.73	0.42	0.48	1.42	0.83	1.17	0.09	0.05	0.75	0.5	0.44	0.36	0.53	1.26	0.9	0.7	0.33	0.31	1.62	0.41	0.65	0.87	1.65	1.05	0.52	0.44	0.79	0.71
306	ENSG00000183747.7	<ACSM2A>	0.13	0.09	0.25	0.13	0.25	0	0.11	0.09	0	0.09	0	0	0.36	0.22	0.09	0.06	0.14	0.04	0.74	0.09	0.09	0.12	0.04	0.09	0.58	0	0	0.19	0.09	0.15	0.13	0.13	0.11	0.45	0.03	0.05	0.16	0.16	0.06	0.09	0.29	0.03	0.28	0	0	0	0.22
307	ENSG00000066813.10	<ACSM2B>	0.02	0.54	1	0.04	0	0	0	0.37	0.26	0	0	0.53	0.38	0	0.07	0	0	0	0.73	0.24	0.04	0.02	0.04	0.07	0.85	0.24	0.88	0.05	0.75	0.16	0.47	0	0.37	0.17	0	0.35	0	0.16	0.07	0.11	0.48	0	0	0.15	0.11	0.11	0.07
308	ENSG00000005187.7	<ACSM3>	2.66	0.18	2.22	4.87	2.92	4.25	2.65	2.65	1.25	4.1	2.45	0.6	1.62	7.76	1.38	2.82	4.8	2.41	1.51	2.94	4.01	2.55	2.33	2.16	1.48	4.95	3.71	4.56	3.01	5.62	1.39	0.79	1.64	5.91	2.9	2.94	1.01	2.02	4.13	3.36	5.18	4.67	0.98	4.85	2.16	3.7	1.32
309	ENSG00000215009.5	<ACSM4>	0	0	0	0	0	0	0	0	0	0	0	0	0	0	0	0	0	0	0	0	0	0	0	0	0	0	0	0	0	0	0	0	0	0	0.19	0	0	0	0	0	0	0	0	0	0	0	0
310	ENSG00000183549.6	<ACSM5>	22.25	8.1	12.32	12.79	14.8	18.4	14.07	7.28	22.37	17.9	10.46	26.2	33.45	27.91	16.73	8.47	19	15.52	24.18	10.05	9.33	10.65	13.88	19.59	17.59	14.39	21.64	9.92	12.54	19.88	4.97	11.89	7.41	23.52	21.84	15.39	15.01	13.68	14.4	16.31	16.21	11.97	10.56	4.9	22.58	13.46	17.85
311	ENSG00000154930.10	<ACSS1>	15.05	17.23	17.66	20.37	20.51	17.94	13.31	9.59	25.01	19.86	19.32	18.29	21.73	21.17	18.32	17.26	18.87	16.22	24.2	25.57	12.97	26.6	16.49	17.97	19.66	18.86	21.25	16.15	18.35	11.11	15.45	14.05	13.47	25.97	17.86	13.83	17.08	19.92	7.52	14.27	25.26	26.96	22.48	13.49	17.76	14.29	10.02
312	ENSG00000131069.15	<ACSS2>	102.25	148.37	102.19	113.8	115.47	158.54	99.64	127.52	120.37	126.08	103.97	102.36	140.24	136.91	84.45	71.56	117.74	112.69	135.03	97.73	283.34	127.85	75.63	121.7	94.29	100.02	136.04	101.83	102.83	115.06	88.68	118.32	132.2	142.01	107	90.31	99.82	110.98	113.45	126.14	154.31	124.42	115.02	102.33	150.86	114.65	129.76
313	ENSG00000111058.3	<ACSS3>	33.68	26.05	33.8	55.82	52.01	35.03	28.6	28.02	47.89	34.24	33.2	42.16	31.49	63.43	43.99	33.06	42.11	41.63	49.7	37.41	40.16	57.41	32.51	37.4	46.94	32.47	22.34	37.62	36.07	30.73	23.7	30.54	39.31	32.88	25.33	34.88	35.22	36.77	33.47	43.02	31.51	68.07	36.78	36.07	37.42	38.36	34.36
314	ENSG00000143632.10	<ACTA1>	20.94	110.35	69.74	29.82	329.8	14.89	10.25	8.29	18.43	28.46	7.77	39.1	22.54	8.57	8.56	103.05	34.86	22.06	16.08	10.61	142.22	4.19	21.18	23.63	18.74	7.62	42.05	11.1	8.43	5.13	16.76	33.12	79.03	2.23	5.1	18.21	38.04	0.7	10.11	4.62	228.84	6.92	8.59	6.82	7.66	11.09	1.28
315	ENSG00000107796.8	<ACTA2>	92.9	72.31	124.93	61.47	43.44	253.71	55.74	126.41	91.7	135.02	46.58	134.68	107.06	169.31	88.11	45.21	47.05	69.72	74.31	177.38	36.61	232.5	116.05	80.82	144.84	71.77	128.1	188.41	117.09	60.17	75.22	58.43	56.31	69.51	67.73	129.66	187.19	233.14	63.6	106.57	682.32	102.51	254.99	74.66	55.69	52.46	104.74
316	ENSG00000075624.9	<ACTB>	481.23	557.94	972.83	443.67	475.95	864.97	616.24	325.05	793.25	632.44	680.51	636.21	915.76	817.24	698.45	609.11	444.17	485.15	591.78	845.58	563.47	773.02	398.4	500.67	729.53	810.53	650.04	1052.32	834.75	394.47	646.24	460.17	308.15	449.56	648.16	740.1	1072.73	2227.09	492.11	719.38	2457.33	893.51	1066.83	613.65	760.25	534.85	521.59
317	ENSG00000169067.2	<ACTBL2>	0	0	0	0	0	0	0	0	0	0	0	0	0	0	0	0	0	0	0	0	0	0	0	0	0	0	0	0	0	0	0	0	0	0	0	0	0	0	0	0	0	0	0	0	0	0	0
318	ENSG00000159251.6	<ACTC1>	4.61	2.9	8.44	2.32	8.24	10.5	2.54	10.69	0.02	7.66	4.21	3.15	9.84	1.5	6.88	2.33	2.22	4.48	5.05	5.69	0.84	7.23	4.53	4.44	5.08	0.27	2.49	9.82	9.87	2.49	32.27	4.83	1.46	1.4	15.16	3.58	7.94	2.89	2.47	7.37	37.39	0.76	5.02	30.82	2.46	4.33	4.49
319	ENSG00000184009.5	<ACTG1>	900.52	774.87	1167.47	973.81	880.45	1068.81	1118.96	396.46	894.26	865.18	820.92	1005.18	749.21	1062.46	543.64	820.18	971.21	937.98	682.66	720.03	422.23	649.88	479.14	641.65	952.78	783.69	908.76	906.53	850.91	481.43	835.3	689.26	544.6	653.6	737.99	1172.68	981.91	929.01	999.34	620.51	886.53	796.63	878.24	710.8	723.61	735.78	607.62
320	ENSG00000163017.9	<ACTG2>	18.51	0.59	26.64	15.15	12.08	149.4	15.83	76	5.45	23.28	4.23	5.83	11.12	8.04	3.47	28.93	6.71	3.35	8.95	13.29	2.46	60.43	25.51	13.19	36.52	10.04	13.01	27.87	11.53	14.15	25.84	18.03	6.68	2.85	5.77	18.57	26.39	23.11	43.52	22.06	72.14	6.37	14.69	28.48	2.52	6.1	45.43
321	ENSG00000182584.4	<ACTL10>	0	0	0	0	0	0	0	0	0	0	0	0	0	0	0	0	0	0	0	0	0	0	0	0	0	0	0	0	0	0	0	0	0	0	0	0	0	0	0	0	0	0	0	0	0	0	0
322	ENSG00000136518.12	<ACTL6A>	78.57	84.12	67.55	78.95	63.46	74.08	62.8	73.01	81.61	74.1	76.45	72.8	64.52	83.08	54.94	65.37	71.7	82.86	72.28	90.03	78.06	59.65	67.83	75.88	65.61	100.63	75.59	74.47	63.75	84.47	97.55	71.92	74.63	91.89	80	83.57	71.29	84.23	65.45	81.52	79.23	61.62	70.87	119.91	68.99	115.54	88.58
323	ENSG00000077080.5	<ACTL6B>	0	0.11	0	0	0.18	0.22	0	0	0	0	0.11	0	0.1	0.17	0.11	0.15	0.09	0	0	0	0.11	0	0	0	0	0	0.14	0	0.09	0	0	0	0	0	0	0.09	0.1	0	0	0	0	0.12	0	0	0.23	0.09	0
324	ENSG00000187003.5	<ACTL7A>	0	0	0	0	0	0	0	0	0	0	0	0	0	0	0	0	0	0	0	0	0	0	0	0	0	0	0	0	0	0	0	0	0	0	0	0	0	0	0	0	0	0	0	0	0	0	0
325	ENSG00000148156.6	<ACTL7B>	0	0	0	0	0	0	0	0	0	0	0	0	0	0	0	0	0	0	0	0	0	0	0	0	0	0	0	0	0	0	0	0	0	0	0	0	0	0	0	0	0	0	0	0	0	0	0
326	ENSG00000117148.6	<ACTL8>	0	0	0	0	0	0	0	0	0	0	0	0	0	0	0	0	0	0	0	0	0	0	0	0	0	0	0	0	0	0	0	0	0	0	0	0	0	0	0	0	0	0	0	0	0	0	0
327	ENSG00000181786.3	<ACTL9>	0	0	0	0	0	0	0	0	0	0	0	0	0	0	0	0	0	0	0	0	0	0	0	0	0	0	0	0	0	0	0	0	0	0	0	0	0	0	0	0	0	0	0	0	0	0	0
328	ENSG00000072110.9	<ACTN1>	81.39	94.27	149.99	128.64	121.98	226.76	125.36	222.75	89.71	121.92	166.25	77.89	146.65	78	159.14	244.98	79.54	122.79	110.25	183.31	57.68	242.33	107.4	95.96	178.89	85.24	146.32	162.68	165.32	121.04	149.32	95.32	99.35	79.22	101.4	149.54	220.24	215.13	104.96	192.69	300.75	55.95	209.62	103.62	138.9	130.96	165.92
329	ENSG00000077522.8	<ACTN2>	0.5	4.95	5.57	3.62	10.53	3.91	3.13	2.98	3.34	3.09	1.49	3.78	2.25	1.54	1.52	11.08	2.69	6.01	2.54	4.93	6.3	2.58	2.43	2.58	2.74	1.78	2.23	2.54	5.26	1.73	3.24	1.68	3.8	0.47	1.67	4.87	4.44	1.83	2.36	3.95	21.3	3.67	3.07	4.24	3.9	0.96	2.64
330	ENSG00000130402.7	<ACTN4>	475.41	398.74	507.39	469.98	552.62	791.89	454.66	417.07	452.74	458.83	345.59	393.05	350.58	377.21	263.4	422.49	374.06	549.56	325.35	360.12	144.79	666.93	331.59	303.66	542.19	176.15	276.79	415.56	484.8	565.57	359.69	323.27	283.14	322.83	329.98	584.43	522.86	406.87	542.6	447.61	524.82	185.65	378.35	414	382.59	360.49	440.18
331	ENSG00000131966.9	<ACTR10>	46.18	104.98	79.75	46.58	75.65	89.31	63.33	75.34	86.21	77.38	70.56	91.8	104.51	43.72	90.62	69.65	63.38	35.66	88.45	118.29	133.92	68.76	88.48	85.02	65.93	112.3	88.18	89.3	79.74	58.79	106.01	94.25	93.93	93.99	101.59	62.27	107.75	139.33	45.51	65.59	100.55	124.3	95.89	88.31	91.91	80.23	78.57
332	ENSG00000138107.7	<ACTR1A>	16.02	21.93	18.12	19.16	33.25	24.77	12.68	19.8	33.1	30.04	16.99	20.83	23.23	19.93	18.2	20.1	21.02	28.34	20.29	15.4	15.15	21.38	18.71	18.21	21.19	22.3	41.59	37.11	23.03	25.4	14.96	17.09	21.3	27.96	51.39	29.1	32.09	12.56	12.08	15.14	41.5	34.28	20.21	19.06	16.84	20.74	25.91
333	ENSG00000115073.6	<ACTR1B>	54.96	36.15	38.98	62.07	75.87	44.39	37.03	72.84	49.68	47.3	49.85	37.21	63.24	59.81	52.45	44.58	45.81	41.65	49.52	52.83	30.36	45.12	61.58	47.32	50.78	33.89	78.26	34.73	36.13	60.61	30.1	45.99	41.85	56.5	45.6	39.13	38.06	56.51	28.31	42.62	59.08	54.46	55.69	53.15	78.19	40.87	40.7
334	ENSG00000138071.9	<ACTR2>	0.93	0.61	0.58	0.81	0.76	1.18	0.77	0.24	0.33	0.2	0.6	1.41	0.45	0.37	0.67	0.79	0.67	0.37	1.51	0.21	0.27	2.02	1.24	0.53	1.87	0	0.18	0.86	0.3	1.44	0.6	0	0.37	0.76	0.15	0.55	1.01	0.16	0.87	1.86	1.99	0	1.36	0.52	1.15	0.68	1.25
335	ENSG00000115091.7	<ACTR3>	89.77	92.34	65.4	78.12	54.9	94.55	84.69	81.24	71.26	78.01	55.06	100.67	53.06	78.16	36.67	77.76	74.4	83.98	72.95	67.21	72.65	59.92	78.46	70.3	92.38	85.75	88.68	84.77	55.95	83.34	108.76	57.88	62.24	60.65	76.55	79.73	64.32	59.35	82.41	81.65	76.36	60.84	65.93	74.53	63.46	64.26	101.95
336	ENSG00000133627.13	<ACTR3B>	26.88	18.18	12.88	18.42	14.98	18.91	25.4	18.74	13.12	14.95	15.81	25.8	12.42	19.36	17.52	12.72	20.53	24.18	12.87	25.25	10.34	13.48	21.71	17.9	13.73	21.9	14.95	20.51	13.53	11.22	13.6	18.88	20.15	17.45	15.47	18.47	8.03	9.48	20.08	18.85	14.96	14.24	13.35	14.02	13.51	17.41	18.13
337	ENSG00000106526.6	<ACTR3C>	1.11	0.94	2.35	1.01	2.13	1.43	1.31	1.36	1.88	1.82	0.65	1.73	0.81	1.27	0.12	1.77	1.17	1.55	0.76	1.64	0.95	1.34	0.52	1.38	1.42	0.24	1	1.95	0.52	1.64	0.45	0.04	0.91	0.86	0.33	2.58	1.66	1.76	0.48	1.65	1.82	2.46	0.14	2.01	1.88	1.39	0.18
338	ENSG00000101442.8	<ACTR5>	0	0	0	0	0	0	0	0	0	0	0	0	0	0	0	0	0	0	0	0	0	0	0	0	0	0	0	0	0	0	0	0	0	0	0	0	0	0	0	0	0	0	0	0	0	0	0
339	ENSG00000075089.5	<ACTR6>	48.39	43.91	38.81	40.28	39.01	39.07	35.27	37.04	53.18	40.59	32.11	72.94	41.08	57.52	40.81	35.22	44.54	44.73	46.01	43	47.39	48.02	45.39	44.52	41.21	52.61	47.81	48.87	37.99	59.26	36.98	47.52	54.46	43.64	55.25	48.15	43.53	44.28	50.08	54.12	33.18	42.7	38.42	58.01	41.28	53.96	37.74
340	ENSG00000113812.9	<ACTR8>	32.82	28.59	25.85	32.15	29.29	37.65	23.38	24.78	35.03	27.65	24.14	31.7	33.18	30.04	25.13	21.58	28.79	30.87	19.75	19.12	19.31	29.02	35.14	26.03	27.08	25.57	22.04	25.37	19.36	23.66	21.96	23.34	22.91	20.51	29.47	24.54	22.64	23.37	22.39	27.31	31.66	19.66	24.6	24.82	27.53	30.87	33.26
341	ENSG00000123165.7	<ACTRT1>	0	0	0	0	0	0	0	0	0	0	0	0	0	0	0	0	0	0	0	0	0	0	0	0	0	0	0	0	0	0	0	0	0	0	0	0	0	0	0	0	0	0	0	0	0	0	0
342	ENSG00000169717.5	<ACTRT2>	0	0	0	0	0	0	0	0	0	0	0	0	0	0	0	0	0	0	0	0	0	0	0	0	0	0	0	0	0	0	0	0	0	0	0	0	0	0	0	0	0	0	0	0	0	0	0
343	ENSG00000184378.2	<ACTRT3>	0	0	0	0	0	0	0	0	0	0	0	0	0	0	0	0	0	0	0	0	0	0	0	0	0	0	0	0	0	0	0	0	0	0	0	0	0	0	0	0	0	0	0	0	0	0	0
344	ENSG00000115170.9	<ACVR1>	30.72	48.58	34.01	40.7	33.18	57.92	40.33	49.35	43.83	37.26	32.15	37.88	26.33	41.94	23.09	15.42	33.57	46.79	34.31	36.22	43.97	37.48	28.25	40.24	38.52	35.81	22.94	43.05	38.57	36.62	37.52	33.34	42.14	27.96	32.57	54.25	48.92	30.34	45.7	32.64	32.16	21.18	41.92	43.37	33.55	40.1	41.73
345	ENSG00000135503.8	<ACVR1B>	0.22	1.89	3.22	3.53	3.22	2.31	3.42	2.81	3.08	1.92	2.36	4.42	3.6	4.48	2.19	3.86	1.34	2.1	1.82	0.93	1.46	2.16	2.79	2.27	2.56	1.28	2.88	2.51	1.2	2.71	1.86	4.79	3.45	0.66	2.47	2.38	3.85	2.65	3.13	4.55	1.53	0	2.79	1.34	4.27	1.87	4.14
346	ENSG00000123612.11	<ACVR1C>	0	0	0.02	0	0	1.02	0.2	0.28	0.51	0.68	0.11	0.14	0.29	0.35	0	0	0.04	0.24	0	0.48	0.44	0	0.44	0.8	0	0	0	0.35	0	0	0.26	0.26	0.16	0.29	0	0.31	0.09	0.47	0.48	0.15	0	0.57	0	0.04	0	0	2.02
347	ENSG00000121989.10	<ACVR2A>	18.06	11.18	17.28	9.08	17.11	10.48	13.58	11.72	10.82	9.5	9.77	15.48	10.5	13.65	13.95	9.66	7.94	8.46	14.92	15.37	12.37	16.93	11.28	9.07	10.97	12.02	7.87	18.16	9.79	14.42	9.86	9.25	9.67	9.99	9.9	8.71	20.02	19.31	6.09	10	17.6	8.02	20.06	12.13	11.75	13.38	8.25
348	ENSG00000114739.9	<ACVR2B>	0.23	0.07	0.49	0.22	0.63	0.23	0.13	0.15	0.16	0.31	0.09	0.32	0.6	0.24	0.23	0.54	0.09	0.13	0.27	0.36	0.02	0.53	0.2	0.31	0.25	0.04	0.11	0.09	0.18	0.11	0.11	0.11	0.22	0.36	0.46	0.22	0.26	0.31	0.22	0.15	0.19	0.29	0.28	0.17	0.53	0.11	0.38
349	ENSG00000139567.8	<ACVRL1>	24.08	104.46	28.44	42.81	26.91	43.99	33.18	50.06	29.11	42.28	104.97	16.43	27.53	28	23.59	42.52	32.31	43.64	19.88	19.29	76.06	41.72	25.96	53.65	33.21	32.91	20.46	24.8	22.15	27.99	66.4	21.75	19.2	38.98	18.44	30.75	26.93	47.71	35.09	38.87	33.03	24.69	33.42	37.62	38.94	27.64	30.66
350	ENSG00000243989.3	<ACY1>	31.3	20.54	31.19	34.85	27.3	28.78	25	23.09	40.31	24.31	41.26	32.32	35.85	27.96	26.05	25.02	30.89	28.12	19.42	29.66	28.21	24.78	22.46	26.81	34.22	26.17	22.97	33.1	24.77	28.28	34.88	35.52	16.97	32.81	25.5	28.26	19.67	40.93	13.15	36.77	36.54	37.64	23.63	20.1	27.92	30.43	31.54
351	ENSG00000132744.3	<ACY3>	0.61	0.68	0.19	0.13	0	0	0	0	0	0.41	0.25	0	0	0	1.33	0	0	0.5	0	0	0.22	0.5	0.11	0.24	0	0.15	0.16	1.42	1.7	0.25	0.13	0.13	0.16	0.03	0	0	1.26	0.4	0.81	0	0	0	0	0	0	0	0
352	ENSG00000119640.4	<ACYP1>	11.55	8.57	8.44	9.23	9.47	6.29	7.28	6.6	8.83	7.47	9.31	15.8	13.25	13.28	8.33	9.45	6.69	6.49	14.25	26.39	7.21	6.93	8.26	13.46	10.85	8.91	5.2	6.1	6.91	10.46	10.86	9.25	6.3	10.71	8.63	11.41	10.04	9.57	8.65	13.93	12.64	5.3	9.36	7.67	12.32	9.78	8.17
353	ENSG00000170634.8	<ACYP2>	33.76	34.12	29.23	26.45	30.68	35.5	30.6	42.51	30.39	39.36	28.96	30.3	27.78	24.6	31.92	22.73	38.19	26.83	32.31	38.97	31.51	29.08	37.49	36.2	33.48	33.21	30.42	31.03	27.66	34.79	28.3	37.97	33.68	27.39	37.72	29.43	37.6	28.33	36.44	35.25	31.82	23.41	37.1	34.59	30.2	34.18	26.39
354	ENSG00000196839.8	<ADA>	2.41	10.19	3.08	10.13	3.63	9.77	5.22	10.77	3.71	3.22	9.71	4.05	6.49	8	6.05	5.63	3.23	4.29	1.07	3.62	5.55	7.27	3.82	7.89	2.92	3.54	4.94	5.49	7.41	11.24	5.38	3.24	2.9	5.27	5.43	6.94	6.77	12.63	2.08	6.57	9.29	5.94	4.7	4.98	10.67	7.89	6.69
355	ENSG00000164113.6	<ADAD1>	0.36	0	0	0.07	0	0	0	0	0.07	0	0	0	0	0	0	0.06	0	0.07	0.07	0	0	0	0	0	0	0	0	0	0.04	0	0	0	0	0	0	0	0.3	0	0	0	0	0	0	0	0	0.04	0.09
356	ENSG00000140955.6	<ADAD2>	0.9	2.32	0.75	1.07	1.76	1.76	0.97	0.51	1.95	1.49	1.11	1.17	1.82	3.54	2.4	0.41	4.28	1.14	3.58	0.8	0.75	0.99	2.7	1.32	3.39	2.18	0.95	0.28	2.15	1.67	1.33	1.66	1.31	0	4.18	0.47	0.56	2.33	0.22	6.14	2.81	1.41	1.05	2.9	0.23	1.85	1.78
357	ENSG00000168803.10	<ADAL>	11.63	7.47	7.96	6.3	7.5	9.19	7.29	5.42	8.37	7	6.52	7.69	5.71	9.25	7.13	6.33	5.85	9.55	10.93	7.46	8.14	6.6	4.07	5.86	7.24	3.94	8.5	7.71	4.95	8.98	6.9	4.83	8.38	9.38	6.75	7.87	8.1	7.7	8.74	7.25	8.66	9.12	6.66	4.74	9.71	7.08	8.72
358	ENSG00000137845.10	<ADAM10>	19.73	9.16	12.11	15.33	24.06	5.16	6.81	6.19	8.42	11.01	12.18	20.3	15.32	15.74	17.49	15.6	13.91	12.26	15.43	11.33	3.73	18.96	16.66	6.84	11.33	5.24	11.38	7.85	8.77	14.18	3.62	7.94	13.94	12.47	15.91	11.1	15.01	9.29	16.78	11.8	11.43	14.74	14.17	9.51	12.59	18.32	9.04
359	ENSG00000073670.9	<ADAM11>	0.68	0.99	0	1.34	0	2.26	0.79	0.83	1.42	0.59	3.45	0.65	0.98	0.92	0.51	0.65	2.13	2.05	1.25	0	0.38	1.72	0.48	0.89	0.74	0	1.23	0.37	0	0	0.23	1.27	1.1	4.46	0.98	1.22	1.66	0.1	1.7	0.46	2.15	0.45	1.6	1.37	1.93	1.44	0.18
360	ENSG00000148848.10	<ADAM12>	0.32	0.5	0.54	0.43	0.3	1.61	0.77	1.14	0.74	0.68	0.29	0.27	0.71	0.62	0.92	1.05	0.09	0.04	0.65	0.42	3.35	1.04	0.21	1.43	0.41	0.33	0.16	0.54	1.08	0.87	0.68	0.5	0.44	0.24	1.03	0.95	1.57	1.27	0.72	0.63	1.99	0.86	0.82	0.15	1.01	0.48	2.6
361	ENSG00000143537.9	<ADAM15>	175.92	252.33	167.53	365.93	191.11	190.94	168.09	264.92	158.82	282.49	404.9	137.33	223.84	207.37	224.32	374.67	253.69	296.24	313.44	206.86	287.89	222.19	254.08	309.06	241.56	227.81	315.78	210.6	171.57	283.38	229.81	229.67	282.09	426.46	151.55	202.11	160	254.23	238.66	292.6	278.96	212.97	267.27	229.08	283.04	281.83	269.24
362	ENSG00000151694.8	<ADAM17>	1.72	2.41	1.49	0.6	2.36	1.77	0.76	2.31	1.02	0.92	2.21	0.85	2	2.55	2.26	1.83	1.12	1.6	1.18	1.11	0.76	2.55	1.19	0.89	1.41	0.2	1.67	1.53	1.74	1.45	0.47	0.74	2.68	1.4	1.41	1.09	2.43	1.79	0.76	1.63	2.54	0.77	1.27	1.97	3.3	1.09	2.51
363	ENSG00000168619.11	<ADAM18>	0.13	0	0	0	0	0	0	0	0	0	0	0	0	0	0	0	0	0	0	0	0	0	0	0	0	0	0	0	0	0	0	0	0	0	0	0	0	0	0	0	0	0	0	0	0	0.15	0
364	ENSG00000135074.11	<ADAM19>	2.71	3.13	2.73	2.79	3.91	12.76	6.47	2.99	7.21	2.99	1.74	4.84	4.92	1.17	4.46	1.98	9.11	1.05	2.65	11.42	2.88	8.19	3.89	1.96	3.71	10.32	2.27	5.24	5.72	1.71	7.33	2.84	1.61	13.7	3.47	6.07	6.39	4.83	2.6	1.82	3.78	2.67	6.1	1.65	15.95	4.2	6.51
365	ENSG00000104755.10	<ADAM2>	0	0.29	0	0	0	0	0	0	0	0	0	0	0	0	0	0	0	0	0	0	0	0	0	0	0	0	0	0	0.04	0	0	0	0	0	0	0	0	0.05	0	0.24	0	0	0	0	0	0.04	0.07
366	ENSG00000134007.3	<ADAM20>	0	0	0	0	0	0	0	0	0	0	0	0	0	0	0	0	0	0	0	0	0	0	0	0	0	0	0	0	0	0	0	0	0	0	0	0	0	0	0	0	0	0	0	0	0	0	0
367	ENSG00000139985.5	<ADAM21>	0.79	0.32	0.88	0.11	0	0.36	0	0.33	0	0	0.29	0	0	0.57	0	0	0	0	0.29	0	0	0.19	0.8	0.34	0	0	0	1.03	0	0	0	0.39	0	0	0	0.76	0	0.35	0.37	0	0	0.6	0	0	0.89	0	0
368	ENSG00000008277.10	<ADAM22>	6.09	2.92	3.4	2.52	3.8	9.14	5.17	4.06	5.08	3.2	1.72	3.11	4.08	4.55	3.47	2.71	2.27	2.69	1.8	2.94	2.35	5.77	5.42	2.87	2.5	3.06	2.41	4.51	4.93	3.67	1.61	2.53	3.96	2.49	4.66	4.31	6.93	6.01	6.36	3.75	7.96	2.5	9.41	2.62	3.55	5.82	2.07
369	ENSG00000114948.8	<ADAM23>	0.84	2.03	11.61	3.2	15.95	11.54	12.36	5.16	8.3	1.37	6.06	9.79	2.46	3.78	6.33	4.26	4.6	5.12	2.09	12.2	3.66	10.81	8.85	5.95	15.03	1.34	2.53	3.66	2.64	3.98	3.83	11.43	7.57	2.32	5.59	10.52	3.06	10.61	4.15	0.74	5.71	2.6	8.92	3.03	1.29	6.19	0.33
370	ENSG00000042980.8	<ADAM28>	19.18	6.66	16.61	19.71	41.98	18.98	29.21	16.37	19.89	16.89	22.09	17.42	53.36	37.54	53.88	18.52	13.53	22.39	29.04	10.88	4.24	24.78	8.9	14.87	16.69	5.33	14.4	22.67	34.37	15.04	4.86	11.3	17.32	27.89	25.02	15.72	35.1	30.35	8.17	16.88	27.71	7.99	25.65	10.46	28.7	19.58	9.68
371	ENSG00000168594.11	<ADAM29>	0	0.04	0.3	0.04	0	0.04	0	0	0	0	0.27	0	0	0.13	0.02	0	0	0.04	0	0	0	0.07	0.02	0	0	0	0	0.11	0	0	0	0	0	0.03	0.03	0	0.07	0	0	0.02	0	0	0	0	0	0.11	0.11
372	ENSG00000134249.6	<ADAM30>	0	0	0	0	0	0	0	0	0	0	0	0	0	0	0	0	0	0	0	0	0	0	0	0	0	0	0	0	0	0	0	0	0	0	0	0	0	0	0	0	0	0	0	0	0	0	0
373	ENSG00000197140.10	<ADAM32>	0.84	1.75	2.33	2.33	1.69	4.23	1.53	3.1	1.93	1.6	2.6	4.19	1.39	1.83	1.93	2.7	3.25	2.36	1.76	0.88	5.35	2.95	1.24	2.3	1.8	1.36	2.28	2.09	3.35	3.95	3.34	4.39	2.39	1.3	3.39	2.04	2.64	2.04	1.6	3.58	2.35	2.07	2.96	0.91	3	4.34	3.72
374	ENSG00000149451.13	<ADAM33>	310.59	205.48	301.49	140.89	140.32	202.61	192.91	156.34	247.84	293.64	150.01	248.05	248.79	260.1	163.55	97.27	211.48	151.74	248.15	214.6	316.09	109.17	150.89	312.71	166.39	533.83	307.67	396.54	262.86	215.44	85.08	147.39	190.95	197.44	388.88	195.44	394.19	264.81	163.31	140.5	389.68	273.43	377.2	268.72	256.88	182.7	220.2
375	ENSG00000069206.11	<ADAM7>	0	0	0.02	0	0	0	0	0	0	0	0	0	0	0	0.04	0	0	0	0	0	0	0	0	0	0	0.04	0	0	0	0	0	0	0	0	0	0	0	0	0	0	0	0	0	0	0	0.04	0
376	ENSG00000151651.11	<ADAM8>	8.24	4.1	7.14	9.12	4.75	7.19	11.78	12.86	9.08	8.06	13.07	8.99	9.72	6.26	16.62	8.4	14.78	13.18	16.23	5.78	2.39	12.29	6.09	4.43	8.45	6.51	8.99	6.31	12.38	8.15	9.79	6.67	6.61	6.76	17.46	7.07	7.47	6.67	4.68	6.88	10.34	14.24	17.98	9.23	9.31	7.51	7.04
377	ENSG00000168615.7	<ADAM9>	54.76	65.3	53.72	51.88	70.51	64.41	54.12	65.86	62.45	57.08	45.66	68.63	51.7	70.16	54.66	50.09	44.54	43.92	49.99	61.1	57.1	71.33	45.68	56.4	65.43	51	40.22	46.37	54.5	58.66	66.8	51.46	46.83	47.93	50.13	54.42	62.99	46.86	43.61	55.42	58.06	31.75	66.49	62.14	51.17	48.03	56.45
378	ENSG00000134028.10	<ADAMDEC1>	0	0.18	0	0.52	0	0.14	0.04	0.11	0.07	0.23	0.22	0	0	1.5	0	0	0.29	0.24	0.13	0	0.55	0.12	0.04	0.25	0.36	0.07	0.05	0.12	0.22	0	0.62	0	0	0.33	0.22	1.64	0.19	0.05	0.04	0.33	0.55	0.29	0	0	0.69	0	0.93
379	ENSG00000154734.10	<ADAMTS1>	112.24	192.03	41.85	107.1	92.25	30.12	129.34	168.36	35.65	222.83	147.74	65.36	167.15	133.35	95.68	197.07	116.73	95.96	170.66	158.95	119.99	73.61	185.41	179.59	90.11	77.9	183.99	91.7	137.32	140.15	118.08	142.08	162.04	208.39	114.69	36.8	89.97	137.38	51.19	152.4	150.39	166.12	163.35	108.24	287.31	73.65	385.29
380	ENSG00000142303.9	<ADAMTS10>	88.68	53.09	98.13	75.84	66.69	96.23	78.49	72.13	80.74	102.71	79.42	81.35	123.18	90.69	109.14	37.22	96.52	62.62	62.88	61.17	37.83	108.17	73.77	75.19	84.78	81.42	87.83	120.69	121.66	52.12	38.74	65.58	67.17	73.14	81.57	85.55	125.88	111.95	60.21	70.11	113.16	101.37	142.98	74.93	75.83	93.84	68.64
381	ENSG00000151388.6	<ADAMTS12>	4.36	6.61	10.55	2.5	3.26	15.45	9.08	3.1	12.73	6.73	2.45	7.07	3.39	8.55	5.73	3.29	3.12	3.26	4.7	6.96	7.83	8.31	2.04	3.07	4.52	6.12	6.95	7.03	8.63	5.24	3.56	6.88	3.98	5.29	3.35	11.6	11.76	7.81	3.67	4.01	9.39	4.8	10.28	4.22	5.28	3.11	8.38
382	ENSG00000160323.14	<ADAMTS13>	7.15	4.29	12.74	8.92	7.32	7.74	11.73	6.17	15.44	6.51	9.06	11.11	16.11	14.73	12.93	7.88	13.71	7.52	10.69	10.38	7.3	7.69	10.73	6.71	12.04	7.51	9.04	14.62	10.78	8.91	7.24	5.6	10.22	12.58	12.75	11.2	10.87	12.76	8.7	8.83	13.99	30.8	12.51	6.17	10.4	6.14	6.84
383	ENSG00000138316.6	<ADAMTS14>	2.44	7.6	5.93	0	0	9.05	9.64	1.78	6.01	0.79	5.79	9.58	9.84	8.51	1.34	1.9	2.18	0	0	5.52	10.24	3.73	0	0	1.42	0	0	28.03	0	0	7.11	0	2.61	8.24	0	10	9.27	4.48	1.7	0	4.46	0	10.12	5.02	7.64	4.25	1.15
384	ENSG00000166106.2	<ADAMTS15>	0	0	0	0	0	0	0	0	0	0	0	0	0	0	0	0	0	0	0	0	0	0	0	0	0	0	0	0	0	0	0	0	0	0	0	0	0	0	0	0	0	0	0	0	0	0	0
385	ENSG00000145536.11	<ADAMTS16>	0	0.4	0.6	0	1	0.16	6.93	0.37	0.33	1.37	0.18	0.87	0.45	0	0.09	0.13	0.07	0.48	7.21	0.26	2.71	3.48	0.27	0	4.92	0.16	0.35	0	0.3	0.42	0.34	0.18	0.27	0.09	0.05	0.16	5.3	0.49	3.23	0.11	0.68	0	0.4	3.03	0	0.07	0.04
386	ENSG00000140470.9	<ADAMTS17>	1.42	0.43	1.68	2.82	0	3.08	2.02	0.86	1.67	1.58	0.96	1.82	0.46	0.11	0.72	0.72	0.31	2.4	0.22	0.88	2.19	0.46	0.57	0.11	0.85	1.83	1.02	0.89	0.04	1.07	1.31	0.13	0.37	0.38	1.8	0.87	2.52	0.77	0	0.82	1.12	1.33	1.66	0.8	1.74	0.98	1.41
387	ENSG00000140873.11	<ADAMTS18>	0	0.29	0	0	0.25	0.59	0	0.15	0	0.05	0.42	0.14	0	0	0	0	0	0	0	0.12	0	0.12	0	0.2	0	0	0	0.04	0	0	0	0.26	0	0	0	0.18	0.77	0.63	0	0	1.04	0	0	0	0	0	0.4
388	ENSG00000145808.4	<ADAMTS19>	0	0	0.11	0.29	0.35	0.82	0	0	0.95	0.47	0	0.25	0.03	0	0.28	0.18	0.49	0	0	0	0.15	0.58	0.48	0	0	0	0.18	0	0.22	0	0.09	0	0.18	0.07	0	0	0	0.17	0	0.52	1.02	0	0	0.32	0	0.39	0
389	ENSG00000087116.9	<ADAMTS2>	22.44	36.39	29.97	23.41	16.63	34.55	23.23	23.28	25.01	18.57	31.3	16.75	15.88	13.25	16.02	23.35	25.06	24.49	17.1	19.92	27.94	13.35	8.19	29.74	16.16	18.51	15.16	24.1	22.15	16.46	21.64	12.07	18.53	16.09	12.58	23.92	21.35	20.11	28.12	23.62	22.61	7.2	15.98	17.39	29.25	16.86	39.46
390	ENSG00000173157.12	<ADAMTS20>	0	0	0	0	0.02	0	0	0	0.02	0	0	0	0	0	0	0	0	0	0	0.03	0	0.04	0	0	0	0	0	0	0	0	0	0	0	0.03	0	0	0	0	0	0	0	0	0	0	0	0	0
391	ENSG00000156140.4	<ADAMTS3>	0	0	0	0	0.32	0.36	0.4	0.15	0.28	0	0	0	0.34	0.15	0.3	0.22	0	0	0	0	0.11	0.19	0	0.11	0	0.29	0	0	0.34	0	0.11	0.41	0	0	0	0.47	0.16	0	0.26	0	0.46	0.24	0	0.26	0	0.28	0.31
392	ENSG00000158859.9	<ADAMTS4>	17.88	32.35	9.05	45.54	27.81	6.76	155.24	37.37	7.11	58.33	76.19	14.45	42.35	12.35	39.24	599.79	19.81	11.96	111.41	22.63	22.91	2.72	14.14	19.62	26.15	23.6	127.88	12.1	41.65	26.73	111.05	41.6	49.39	18.12	31.88	32.42	72.86	18.91	6.16	40.41	20.55	37.48	14.31	19.65	57.48	16.49	197.27
393	ENSG00000154736.5	<ADAMTS5>	0	0	0	0	0	0	0	0	0	0	0	0	0	0	0	0	0	0	0	0	0	0	0	0	0	0	0	0	0	0	0	0	0	0	0	0	0	0	0	0	0	0	0	0	0	0	0
394	ENSG00000049192.10	<ADAMTS6>	1.72	3.31	1.61	4.31	6.39	3.1	1.87	3.44	3.34	3.47	1.74	2.47	1.51	5.5	10.61	1.5	2.81	2.4	11.8	2.99	1.62	4.01	1.95	2.48	1.93	1.98	5.09	1.61	3.28	3.64	2.72	2.54	4.36	3.7	1.2	1.96	3.78	4.5	1.49	10.46	2.95	2.34	5.63	4.53	2.68	3.9	4.23
395	ENSG00000136378.10	<ADAMTS7>	10.52	6.07	8.14	5.14	10.77	8.66	5.35	5.95	9.51	10.4	6.88	16.98	9.24	6.81	8.93	9.78	5.03	5.58	8.8	14.9	7.7	4.46	5.69	5.69	5.84	13.23	10.82	12.67	8.36	5.84	7.58	2.19	3.87	10.73	16.86	8.18	6.32	4.64	4.81	8.01	16.41	7.27	14.51	5.96	8.37	3.9	4.29
396	ENSG00000134917.9	<ADAMTS8>	2.96	5.11	5.04	3.06	5.74	2.8	6.97	4.94	6.49	2.18	9.84	5.02	2.98	3.45	5.06	9.45	6.15	5.51	4.72	7.18	2.59	3.8	6.22	5.1	3.46	5.04	4.37	3.44	4.04	4.44	4.56	9.44	6.22	4.25	4.54	5.98	2.92	3.71	1.84	3.4	6.41	4.91	5.26	6.69	3.05	4.33	4.14
397	ENSG00000163638.9	<ADAMTS9>	66.04	78.34	55.23	35.07	155.02	36.66	77.57	131.87	64.67	101.16	97.29	122.52	215.51	71.74	117.15	264.55	37.47	28.77	96.82	153.24	54.07	52.76	94.09	46.7	72.8	77.36	308.83	61.72	104.12	71.08	150.64	68.5	57.42	66.54	78.54	71.15	84.57	96.88	17.46	76.62	136.32	115.9	99.93	82.16	48.64	47.88	252.38
398	ENSG00000178031.11	<ADAMTSL1>	34.38	13.43	30.33	20.18	48.37	14.32	38.51	9.2	27.58	27.33	15.29	35.83	17.45	18.31	58.34	31.88	27.35	16.01	16.34	35.58	8.09	23.2	13.91	14.22	15.39	15.82	26.7	33.62	40.99	22.75	9.98	15.1	10.7	14.1	19.7	41.64	36.69	22.7	17.8	32.58	35.38	12.74	52.53	11	20.38	18.19	14.52
399	ENSG00000197859.5	<ADAMTSL2>	44.82	21.46	117.24	9.81	40.31	96.09	81.03	18.17	102.01	45.07	11.16	61.63	42.64	26.35	61.2	10.3	8.41	20.42	7.26	32.01	40.07	19.72	10.13	19.88	22.97	84.45	29.54	158	125.39	14.46	20.8	21.53	14.51	31.5	25.75	96.64	166.8	34.61	28.88	18.81	115.92	38.26	116.41	35.89	42.1	23.31	21.52
400	ENSG00000156218.8	<ADAMTSL3>	0.9	3.13	2.57	1.57	2.9	8.3	1.46	1.69	1.88	2.84	2.32	1.15	2.56	1.39	1.5	2.57	0.69	6.21	0.38	1.23	1.11	2.97	1.49	1.49	1.64	0.11	0.79	3.3	3.01	1.51	0.45	2.29	2.45	0.31	1.39	4.96	4.3	1.46	3.96	1.93	1.6	0.33	4.76	0.06	1.52	1.61	1.12
401	ENSG00000143382.9	<ADAMTSL4>	129.1	181.65	224.39	149.97	73.86	136.84	129.14	100.91	235.83	220.37	203.14	131.18	124.33	139.37	156.78	88.21	124.21	119.62	162.87	134.91	204.64	107.12	68.4	177.85	118.42	111.64	135.97	224.49	195.05	149.48	140.04	148.14	118.15	178.79	143.8	193.49	183.93	105.54	181.51	169.09	138.6	98.55	229.9	115.99	138.7	141.98	216.41
402	ENSG00000185761.6	<ADAMTSL5>	36.29	34.62	35.45	24.23	42.84	54.23	39.68	42.99	64.23	46.56	26.4	42.04	47.82	35.06	47.34	14.73	24.7	30.94	19.8	46.75	40.56	25.34	10.23	34.22	38.69	35.06	24.92	90.54	50.19	33.02	10.41	30.08	30.19	38.79	22.1	62.36	50.83	27.71	62.24	23.88	36.71	6.54	58.25	51.53	45.59	40.47	27.45
403	ENSG00000105963.9	<ADAP1>	10.79	16.26	17.7	24.05	34.94	17.63	21.61	23.09	19.93	17.85	21.46	19.51	13.25	12.05	39.57	10.14	23.27	11.72	11.44	21.32	10.6	29.13	33.19	28.95	12.41	24.72	31.82	23.67	16.23	25.93	9.51	28.61	14.55	27.32	16.36	27.08	16.71	36.7	8.78	10.15	34.27	13.57	17.65	11.16	22.81	15.75	4.53
404	ENSG00000184060.6	<ADAP2>	6.46	2.81	7.54	5.79	6.04	12.53	3.85	4.08	9.83	3.87	6.66	8.68	5.51	10.84	2.46	3.78	2.67	5.77	3.19	2.75	4.59	4.93	0.53	4.43	4.45	4.29	3	3.91	7.77	2.71	3.36	2.99	4.34	4.16	5.55	5.13	3.25	6.17	4.7	5.42	6.53	9.81	9.08	3.1	8.54	5.38	8.71
405	ENSG00000160710.11	<ADAR>	168.97	139.21	203.96	141.61	243.65	152.97	168.82	152.46	193.31	168.64	159.46	273.62	163.67	150.67	138.88	154.34	142.22	148.89	108.31	147.75	119.09	190.79	158.05	161.34	140.58	80.56	152.22	152.51	175.37	152.06	142.61	116.16	141.02	168.81	176.92	184.49	152.19	137.15	137.88	159.59	221.83	172.46	166.73	149.63	134.09	156.88	141.08
406	ENSG00000197381.11	<ADARB1>	26.45	32.61	22.93	35.85	32.18	31	21.04	50.76	24.45	32.89	35.11	22.9	30.8	23.87	26.08	29.98	21.49	24.66	22.76	26.32	31.71	40.15	28.34	34.82	29.51	28.83	23.55	21.86	25.87	34.88	51.78	20.74	18.12	26.75	29.1	19.56	37.02	36.84	18.64	43.66	36.71	34.85	24.24	39.25	32.93	26.01	32.42
407	ENSG00000185736.11	<ADARB2>	58.96	22.85	5.92	43.3	9.01	6.7	2.4	20.54	6.42	44.04	30.43	16.22	28.03	27.08	23.25	30.04	69.64	45.61	96.26	3.77	12.64	17.31	62.32	39.01	30.78	61.25	62.72	11.17	8.41	67.05	5.64	42.91	29.84	28.89	19.97	3.16	12.42	11.13	36.42	94.83	6.1	17.61	8.99	51.51	58.97	45.79	28.41
408	ENSG00000065457.6	<ADAT1>	36.97	44.49	30.47	40.19	31.12	44.78	38.42	34.08	29.88	27.53	39.5	33.64	29.58	51.76	34.39	42.76	29.68	35.53	43.75	48.03	36.23	41.19	30.17	38.58	47.97	33.76	40.52	41.04	33.83	49.32	38.85	41.18	29.26	47.05	42.33	30.06	33.44	42.57	23.84	58.89	48.47	27.65	39.75	43.39	39.62	41.61	53.77
409	ENSG00000189007.11	<ADAT2>	17.45	13.32	11.2	12.99	17.64	11.97	8.5	9.61	16.22	13.35	19.9	19.47	11.87	19.01	18.69	17.1	8.35	13.03	18.82	22.82	8.54	16.5	15.33	12.26	11.35	7.86	13.63	12.85	15.82	16.22	5.53	15.63	14.93	16.62	11.96	10.9	19.95	14.53	7.47	16.46	20.98	11.54	17.23	10.07	18.88	12.4	12.68
410	ENSG00000213638.4	<ADAT3>	4.11	0.41	0	5.63	5.14	0	1.03	6.98	0.33	0	6.43	0.67	0.53	0	2.78	0.94	0.99	0.2	1.52	3.89	0	2.12	0.34	0.45	2.05	0.46	2.77	0.91	3.37	0.55	1.37	5.12	0.31	0.62	1.99	0.51	0.54	2.77	0.04	1.09	0.2	0.43	4.55	0.17	0.83	0.13	0.29
411	ENSG00000142920.12	<ADC>	13.97	5.85	18.19	8.18	33.62	30.34	23.63	13.48	35.35	13.12	7.73	19.37	20.19	12.51	16.87	11.24	11.08	9.86	9.29	18.53	5.23	15.81	10.06	9.03	12.18	11.14	7.99	23.88	34.75	8.06	9.41	15.56	9.29	11.8	11.29	24.75	17.2	16.94	10.84	9.3	22.53	15.03	20.65	8.36	10.95	13.62	6.91
412	ENSG00000063761.11	<ADCK1>	9.21	5.15	7.14	5.21	5.81	6.43	6.52	11	12.63	7.09	7.28	8.59	8.21	4.79	10.01	1.68	5.25	4.4	5.3	14.4	8.09	5.25	4.8	7.42	4.07	10.3	6.5	12.52	8.34	3	11.89	6.4	3.85	13.2	9.16	7.31	7.86	10.25	1.92	4.32	16.31	11.14	18.85	8.32	7.83	5.8	11.51
413	ENSG00000133597.5	<ADCK2>	0.74	0	0.39	1.97	2.55	0	2.43	0.4	0	0	0.44	7.42	0	4.64	0	1.13	0	0	0.82	1.96	1.07	0	1.08	0	0	1.37	0.86	1.67	3.98	0	0	0	0.84	5.1	0	1.16	0	0.23	0	0.58	1.38	1.5	0.58	0	0	1.92	0
414	ENSG00000163050.12	<ADCK3>	26.79	28.18	39.16	41.31	35.77	45.77	28.29	46.22	23.07	24.59	28.96	24.69	43.25	25.06	31.71	20.25	33.74	29.38	37.21	45.04	47.66	44.64	35.83	58.05	41.39	41.97	32.74	21.19	43.43	30.55	24.34	28.55	34.22	39.65	44.87	22.79	44.32	46.96	34.47	26.75	47.51	54.59	39.41	22.7	24.25	28.75	43.4
415	ENSG00000123815.7	<ADCK4>	146.71	82.69	97.43	83.91	98.01	76.91	105.36	75.07	91.67	106.34	94.98	102.47	106.64	111.44	91.14	95.3	104.3	98.63	116.31	102.14	62.67	68.46	88.55	79.82	95.07	78.77	88.94	98.73	103.47	93.73	94.87	97.27	73.14	120.1	67.2	89.97	87.51	79.49	65.37	108.42	107.89	88.37	97.89	85.13	107.93	82.93	91.1
416	ENSG00000173137.7	<ADCK5>	9.95	15.36	18.62	13.23	8.85	12.97	11.13	13.59	16.53	11.15	15.52	14.33	15.56	13.49	8.65	11.58	16.98	13.38	13.14	18.55	16.57	8.6	10.91	12.44	8.97	18.38	19.04	10.68	12.88	13.93	15.49	18.64	15.68	19.61	24.85	12.7	10.85	16.45	14.7	15.81	26.24	23.64	13.31	12.98	19.48	11.92	13.47
417	ENSG00000164742.10	<ADCY1>	0.48	1.87	1.09	1.09	1.57	0.82	3.37	0.4	0.39	0.52	0.13	1.68	0.36	0.62	0.14	0.3	1.1	0.98	0.69	2.01	0.46	0.34	0.91	0.96	0.72	0.95	3.53	0.67	1.13	0.27	1.18	1.57	1.2	0.59	1.82	1.09	1.38	0.63	1.14	1.17	0.51	1.55	0.33	0.56	1.29	1.04	0.48
418	ENSG00000143199.13	<ADCY10>	0	0	1.14	0.13	0.25	0.7	0.2	0	0.07	0.5	0.2	0	0.31	0.4	0.27	0.11	0.29	0.52	0.27	0.28	0.78	0.11	0.12	0.36	0.41	0.37	1.42	0.21	0.11	0.45	0.17	0.26	0.71	0.24	1.5	0.27	0.72	0.05	0.07	0.24	0.44	0.96	0	0	0	0.04	0.38
419	ENSG00000078295.11	<ADCY2>	4.08	7.89	5.81	13.21	3.06	12.26	5.48	7.61	7	6.82	3.96	4.24	4.39	3.17	8.63	4.39	5.52	14.67	0.91	3.06	6.48	4.39	6.13	9.2	5.87	5.48	4.22	14.55	7.23	2.55	2.14	3.34	10.4	9.52	10.6	8.89	17.01	6.08	10.46	3.47	7.26	4.72	6.41	7.06	10.14	9.67	5.66
420	ENSG00000138031.10	<ADCY3>	248.75	375.21	269.98	420.32	351.94	270.52	230.79	506.76	235.87	402.02	615.94	221	431.94	205.29	387.82	566.98	418.86	271.55	351.99	136.58	369.67	382.19	253.31	326.73	238.55	359.38	400.87	277.66	257.28	432.44	672.68	465.19	333.48	422.3	300.13	266.19	214.57	472.04	311.19	564.82	252.46	360.83	297.03	341.87	418.25	332.09	483.91
421	ENSG00000129467.9	<ADCY4>	92.52	71.82	82.08	91.34	115.26	121.23	68.13	129.68	77.6	145.13	101.9	75.57	176.94	126.32	80.85	142.52	117.2	66.38	152.76	99.81	81.48	102.81	130.1	139.29	117.19	96.05	213.55	111.93	90.7	82.16	93.76	124.48	107.47	148.68	103.12	49.89	81.01	176.72	75.75	140.89	159.8	157.55	132.77	86.4	109.72	124.56	167.75
422	ENSG00000173175.10	<ADCY5>	15.57	18.4	21.62	14.55	11.92	44.59	15.02	28.26	19.03	18.75	12.4	15.99	22.22	23.14	22.14	8.84	14.65	18.19	11.45	9.72	27.39	28.47	13.57	30.43	30.52	13.82	9.98	28.33	18.21	19.82	18.32	16.39	17.23	21.1	12.8	18.25	21.56	19.32	19.73	28.52	24.64	6.01	24.29	18.91	16.64	15.99	32.86
423	ENSG00000174233.7	<ADCY6>	108.05	77.26	111.82	95.78	103.61	95.42	109.18	82.58	124.63	85.83	74.56	124.82	141.6	96.45	84.68	110.34	90.76	72.07	72.17	119.08	62.65	101.09	101.68	91.01	106.89	96.19	109.49	110.12	102.63	76.3	101.69	74.87	69.56	99.64	121.17	104.89	103.67	109.5	64.43	95.99	142.88	117.93	122.76	63.51	75.26	76	95.94
424	ENSG00000121281.8	<ADCY7>	10.07	16.53	21.46	21.61	20.88	26.67	16.77	17.71	20.42	20.96	15.74	13.55	7.57	13.83	10.82	3.27	15.39	16	12.81	12.49	11.07	12.38	3.54	15.92	5.8	5.53	10.77	22.54	23.41	14.24	4.33	10.71	11.15	17.8	24.37	14.19	12.83	14.86	15.56	18.16	20.79	4.11	17.62	17.13	23.29	28.41	14.48
425	ENSG00000155897.5	<ADCY8>	0.13	0.04	0.25	0.02	0	0.22	0.2	0.15	0.62	0.05	0	0.27	0.02	0.09	0.51	0.15	0	0	0.22	0.61	0.02	0.28	0.04	0.09	0.07	0.18	0.23	0.14	0.11	0.24	1.05	0.17	0	0.02	0	0.25	0.09	0.02	0.02	0.07	0.97	0.09	0.94	0.71	0.16	0.11	0.02
426	ENSG00000162104.5	<ADCY9>	4.78	4.21	3.03	5.21	6.02	3.28	3.26	4.46	3.08	4.95	6.23	3.27	3.2	6.2	4.03	3.01	3.41	8.29	6.93	2.86	2.46	6.1	4.23	2.36	5.33	3.56	5.69	5.61	4.27	5.66	2.53	2.01	3.5	2.7	2.51	4.67	5.53	2.21	3.74	7.18	5.33	2.72	3.66	4.83	4.25	6.9	4.6
427	ENSG00000141433.8	<ADCYAP1>	0.48	0.11	2.03	1.59	1.21	1.27	6.16	1.32	1.23	1.4	0.84	1.31	12.29	4.77	8.47	1.03	0.07	0.81	1.82	0.71	1.31	1.56	0.04	6.66	0.38	0.09	0.05	2.37	2.35	0.45	0	0.35	2.23	2.21	0.46	0.84	6.89	0.24	1.53	0.22	1.07	7.01	0.64	0.78	1.08	1.55	0.44
428	ENSG00000078549.10	<ADCYAP1R1>	0.34	0	0.16	0.11	0	0.11	1.15	0.17	0.11	0	0.11	0.67	0	0.24	0.18	0	0	0	0.56	0	0.11	0.19	0.27	0.16	0.07	0.27	0.14	0	0	0	0.21	0.39	0.16	0	0.38	0.13	0.19	0.64	0.72	0.22	0.15	0.21	1.05	0.24	0.11	0.57	0.09
429	ENSG00000087274.12	<ADD1>	622.93	595.87	694.58	545.87	700.48	623.6	678.54	595.44	705.14	659.64	730.16	745.43	700.77	656.2	779.95	511.25	699.49	646.4	660.66	819.75	518.34	602.66	746.14	675.47	670.08	719.25	617.44	787.23	720.49	639.27	444.15	712.02	647.77	807.48	773.58	693.99	678.85	645.3	644.41	808.68	692.17	858.4	770.04	756.25	757.29	681.87	585.17
430	ENSG00000075340.18	<ADD2>	0.97	0.79	2.8	0.63	0.9	1.22	1.53	1.49	1.42	1.33	0.15	1.15	1.24	2.18	0.65	2.95	0.34	0.46	1.58	0.52	0.89	1.91	1.95	0.96	1.12	1.48	3.81	0.91	1.31	0.71	2.89	1.68	1.31	1.69	5.28	1.2	0.45	2.89	5.24	0.07	1.52	1.98	0.91	1.99	1.13	0.92	1.17
431	ENSG00000148700.9	<ADD3>	149.49	102.17	222.64	114.31	369.33	178.79	151.25	78.63	219.72	166.72	136.52	203.82	226.93	247.91	242.29	104.32	146.28	123.62	146.23	220.88	73.47	301.24	177.91	136.66	217.79	87.23	72.87	182.87	164.98	150.83	31.97	118.19	133.55	224.6	198.64	160.39	193.79	195.12	86.27	144.14	213.69	262.81	252.69	150.26	178.25	144.19	119.55
432	ENSG00000118492.12	<ADGB>	0.07	0	0.14	0.09	0	0.41	0.07	0	0.07	0.02	0	0.05	0.22	0.35	0.02	0	0	0.04	0	0.16	0	1.34	0.02	0.02	0	0	0.04	4.45	0.23	0	0	0.04	0	0.07	0.07	0.02	0.1	0.82	0	0.04	0	0	0.21	0	0	0	0.04
433	ENSG00000187758.3	<ADH1A>	0.68	2.03	0.6	1.9	0	0	0.58	0.99	0.49	0	0	0.23	1.74	1.03	0.23	1.48	2.09	0.88	2.38	0.14	0.55	1.03	0.14	1.81	0.94	0.62	1.04	1.75	0.75	1.62	0	0.41	1.06	1.26	2.11	0.62	1.7	0.96	1.75	1.76	0.53	0.55	1.38	0.52	0.5	1.44	1.76
434	ENSG00000196616.8	<ADH1B>	849.24	1289.49	743.77	1617.59	733.85	845.65	414.86	1341.26	704.79	1433.43	858.78	509.62	1019.1	1770.2	607.44	568.15	1625.65	1397.52	1567.95	376.18	2136.05	1200.66	591.32	2602.32	1131.48	1545.53	1157.12	889.35	572.43	1731.01	285.17	1127.7	1779.68	1295.26	1047.25	567.75	490.91	1141.61	2199.55	1196.09	303.22	785.82	616.02	898.13	2017.35	1161.49	3800.89
435	ENSG00000198099.4	<ADH4>	0	0	0	1.56	0.83	0.59	0.2	2.74	0.09	0.45	1.18	0.23	0.48	3.25	0.37	1.09	0.54	0.33	1.52	0.22	0.36	1.89	0.43	1.4	2.05	1.37	0.07	0	0.56	3.53	0.73	0	1.02	1.42	0.64	0.36	1.36	0.51	0.35	0.82	0.84	0.34	0.07	0.82	2.14	0.96	2.31
436	ENSG00000197894.6	<ADH5>	109.62	138.36	105.79	160.74	148.49	147.57	96.81	115.17	115.46	158.1	133.81	87.73	90.24	119.55	90.73	68.31	116.6	168.07	81.28	80.5	172.6	191.02	136.94	137.36	140.46	116.76	76.29	97.9	81.66	139.92	90.97	109.64	146.11	110.18	131.41	109.7	74.68	132.53	127.52	128.31	83.08	55.32	86.02	127.58	160.86	144.56	183.86
437	ENSG00000172955.13	<ADH6>	1.24	1.73	2.22	1.03	2.18	0.97	1.4	1.36	2.08	1.96	2.87	2.3	2.51	0.73	0.74	1.18	1.55	0.96	2.74	1.51	2.71	2.14	1.85	1.67	2.47	0.11	0.98	1.93	2.98	2.6	1.09	1.11	1.92	1.09	1.31	0.56	1.94	2.81	0.96	2.17	4.14	1.38	1.22	2.12	2.57	1.37	0.99
438	ENSG00000196344.7	<ADH7>	0	0	0	0.51	0.32	0	0.09	0.28	0	0.86	0	0	0.09	0.24	0	0	0	0	0	0.35	0	0	0.21	0	0	0.35	0	0	0	0.24	0	0	0	0	0.02	0	0.24	0	0.3	0.22	0.9	0	0	0	0.12	0	0.22
439	ENSG00000147576.11	<ADHFE1>	58.91	96.12	65.03	154.57	99.52	99.76	76.2	128.25	85.09	118.38	174.59	70.47	188.4	187.92	138.3	61.94	182.61	149.35	179.9	121.09	105.54	195.85	131.38	231.2	195.77	81.75	122.12	81.83	90.91	155.66	20.27	123.09	169.6	187.16	56.75	80.72	84.51	104.25	118.3	149.76	92.91	63.8	80.48	140.34	191.86	138.72	121.89
440	ENSG00000182551.9	<ADI1>	24.53	36.62	20.18	21.93	62.42	26.36	21.78	33.95	65.37	27.18	36.14	23.87	88.06	97.22	52.18	15.08	21.2	45.92	31.82	69.59	56.02	50.95	81.83	33.81	19.98	50.71	38.97	47.68	37.22	57.83	36.83	36.53	51.98	76.91	75.05	18.3	48.24	50.17	49.16	45.83	20.79	20.75	29.31	26.62	55.11	44.37	29.36
441	ENSG00000182035.7	<ADIG>	0	0	0	0	0	0.34	0	0	0	0	0	0.37	0	0	0	0	0	0	0	0	0	0	0	0	0	0	0	0	0	0	0	0	0	0	0.26	0	0.16	0	0	0	0.36	0	0	0	0.23	0	0
442	ENSG00000181092.5	<ADIPOQ>	0	0	0	0	0	0	0	0	2.6	0	0	0	0	0	0	0	0.87	0	0.93	0	7.08	1.33	0	3.84	2.36	0	0	0	0	0	0	0	0	0	0	0	0	2.06	3.39	2.15	1.74	0	0	0	0	0.52	3.83
443	ENSG00000159346.8	<ADIPOR1>	9.09	18.74	10.2	25.04	34.01	18.33	11.24	23.53	9.36	16.43	15.32	5.92	9.91	5.54	10.98	10.26	14.54	8.31	11.8	8.15	7.59	30.76	28.36	15.23	9.98	4.97	4.81	14.94	18.93	23.4	5.89	20.29	12.45	35.07	6.5	11.9	12.76	15.7	14.94	11.5	23.72	4.3	11.87	25.45	16.77	8.84	11.75
444	ENSG00000006831.9	<ADIPOR2>	7.18	7.11	4.36	4.76	9.98	2.38	2.74	6.6	4.26	5.31	9.75	7.46	7.37	7.17	10.06	7.79	5.48	8.97	11.73	7.42	2.84	16.61	11.37	8.2	10.96	1.76	7.53	5	4.34	11.98	3.88	5.66	9.05	8.02	13.2	4.29	3.97	3.94	3.17	9.72	2.64	7.27	5.82	11.83	6.91	11.05	7.59
445	ENSG00000148671.9	<ADIRF>	789.88	103.47	1344.63	784.79	1184.59	491.43	734.53	611.93	257.11	589.05	629.94	874.14	758.23	1017.67	828.33	615.79	994.5	755.24	1058.52	151.21	168.11	649.86	690.55	858.25	918.8	153.63	631.39	260.02	1124.58	1135.58	123.56	1468.04	695.33	753.55	152.19	1519.52	361.01	1321.61	1230	1472.88	427	493.14	1298.64	652.71	1292.73	1286.92	760.54
446	ENSG00000156110.9	<ADK>	25.86	29.13	29.44	28.61	45.41	31.79	33.52	27.83	34.19	31.9	26.27	38.5	29.26	31.12	31.67	29.32	25.94	29.56	27.37	33.07	34.57	32.86	23.91	27.1	28.11	38.43	23.38	40.41	29.67	29.5	25.95	32.28	27.05	32.91	21.04	33.11	40.66	29.74	27.48	23.71	29.07	28.68	39.75	32.34	27.44	34.92	28.35
447	ENSG00000148926.5	<ADM>	33.11	41.25	76.95	97.22	23.71	105.12	126.9	74.72	90.91	98.77	125.52	22.33	31.66	103.98	131.03	382.17	47.57	67.19	128.57	71.65	34.51	86.32	26.05	99.99	121.19	107.96	31.88	52.2	89.19	53.61	126.56	30.56	38.33	33.4	65.93	78.73	132.75	225.08	61.91	185.46	111.21	28.82	88.25	127.48	121.42	53.96	143.01
448	ENSG00000128165.7	<ADM2>	0.07	0	0	0	0	0	0	0	0	0	0	0	0	0.39	0	0.35	0	0	0.07	0	0	0	0	0	0	0	0	0	0	0	0.51	0	0	0	0	0	0.19	0	0	0	0.19	0.31	0	0	0	0	0
449	ENSG00000224420.3	<ADM5>	0	0	0	0	0	0	0	0	0	0	0	0	0	0	0	0	0	0	0	0	0	0	0	0	0	0	0	0	0	0	0	0	0	0	0	0	0	0	0	0	0	0	0	0	0	0	0
450	ENSG00000101126.11	<ADNP>	51.42	56.88	43.46	40.28	55.96	52.4	51.28	42.4	62.82	54.98	42.92	61.6	58.53	54.11	49.64	41.33	46.38	50.27	44.92	60.56	48.63	59.21	55.16	51.31	49.86	43.52	46.68	60.83	50.32	50.04	51.98	50.1	44.15	51.99	62.8	52.2	57.53	48.48	55.05	53.36	54.48	64.15	67.99	54.74	56.49	51.87	45.95
451	ENSG00000101544.4	<ADNP2>	0	0.31	0	0	0.42	0.5	0.5	0	0	0.5	0	0	0	0	0	0.76	0.43	0	0	0	0	1.34	0.27	0.51	0.36	0.38	0.51	0	0	0.89	0	0.31	0	0.38	0	0.22	0	0.3	0.35	1.19	0	0	0.84	0.5	0.69	0	0
452	ENSG00000181915.3	<ADO>	0	0	0	0	0	0	0	0	0	0	0	0	0	0	0	0	0	0	0	0	0	0	0	0	0	0	0	0	0	0	0	0	0	0	0	0	0	0	0	0	0	0	0	0	0	0	0
453	ENSG00000163485.11	<ADORA1>	0.57	0.72	0.49	0.9	0.44	7.99	1.78	0.31	2.34	0.41	0.54	0	0.48	4.15	0.99	0.87	0.6	0.48	0.94	0.52	3.3	1.26	0.57	0.42	0.49	0.86	0.11	0.98	1.2	0.95	0.17	0.7	0.07	1.3	0	1.45	1.03	0.85	0.33	1.09	1.11	0.67	2.04	0.35	0	0.79	0.6
454	ENSG00000128271.15	<ADORA2A>	1.38	0.68	1.26	1.1	1.39	5.45	2.09	1.41	2.6	1.8	0.98	5.97	2.82	1.39	1.31	1.74	1.59	1.55	1.25	1.35	0.97	2.85	1.17	2.5	1.66	4.31	1.86	4.03	1.54	2.02	1.63	2.3	1.31	1.8	8.16	2.18	1.38	2.16	0.5	3.97	2.39	3.15	0	1.15	0.28	1	1.67
455	ENSG00000170425.3	<ADORA2B>	0.31	2.59	0.25	0.71	0.25	1.16	2.61	2.66	2.37	1.69	0.18	0	2.03	0.13	2.33	0.39	0	1.51	0.45	3.03	1.71	0.94	1.9	1.09	0.23	1.04	1.04	1.23	0.3	2.18	1.16	0.85	0.66	2.92	0.19	0	3.73	1.62	1.25	1.19	1.18	3.19	2.68	1.54	2	0	2.05
456	ENSG00000121933.13	<ADORA3>	3.68	8.91	4.06	12.2	4.54	3.42	3.04	5.82	6.44	7.57	20.59	1.75	10	14.79	9.23	5.72	9.18	9.84	3.76	5.26	8.4	6.92	3.57	6.28	9.17	3.02	4.72	5.05	2.89	3.46	13.45	5.16	8.03	16.05	23.25	1.47	7.17	3.47	5.29	8.11	5.49	12.22	3.66	8.04	11.79	12.44	14.26
457	ENSG00000159322.13	<ADPGK>	58.35	60.93	64.33	57.36	69.18	72.54	50.97	63.99	74.29	65.14	73.11	64.16	69.87	67.5	84.24	79.7	68.23	62.12	68.27	78.49	82.34	73.64	64.14	62.06	54.72	58.2	72.96	83.2	77.6	69.18	83.79	66.27	77.53	81.62	56.01	48.04	67.16	75.15	50.64	65.9	89.98	72.28	71.25	58.98	95.54	67.01	80.11
458	ENSG00000144843.7	<ADPRH>	3.05	1.66	0.96	2.62	3.43	4.12	3.53	2.94	1.95	2.12	2.02	3.13	2.84	2.68	2.78	2.12	1.48	2.73	1.42	1.49	2.31	2	3.64	1.94	1.86	1.98	3.42	1.65	1.08	3.15	2.91	3.89	3.47	1.83	1.15	2.07	4.39	2.72	1.94	3.21	3.43	0.33	2.09	3.42	3.44	3.31	3.08
459	ENSG00000153531.8	<ADPRHL1>	0.68	1.1	1.94	1.7	2.02	1.22	0	1.43	0.84	1.39	1.85	1.71	1.22	1.89	1.63	0.35	2.33	1.88	0.64	0.57	0.73	0.62	1.28	0	0.7	0.71	0	1.47	0.02	1.36	0.69	0.57	1.37	0	0.53	0.36	0.82	0.78	1.9	1.21	2.52	1.1	0.59	1.69	0.25	3.75	0.35
460	ENSG00000116863.10	<ADPRHL2>	0	0	0	0	0	0	0	0	0	0	0	0	0	0	0	0	0	0	0	0	0	0	0	0	0	0	0	0	0	0	0	0	0	0	0	0	0	0	0	0	0	0	0	0	0	0	0
461	ENSG00000170222.11	<ADPRM>	19.54	17.59	18.4	14.22	17.8	17.9	12.99	11.7	17.18	17.06	13.96	21.06	24.47	16.16	17.24	15.45	17.54	19.72	20.57	17.42	22.62	18.11	27.31	17.28	21.5	20.09	25.47	27.19	17.74	11.71	12.94	23.23	20.41	20.23	22.05	13.56	10.8	14.9	17.04	15.62	15.1	20.11	18.77	15.01	18.12	13.55	16.13
462	ENSG00000120907.13	<ADRA1A>	0.07	0.67	0.25	0.16	0.11	0.84	0.11	0.7	0.55	0.63	0	0	0.41	0.81	0	0	0	0.13	0	0.36	0.46	0.28	0.07	1.69	0.49	0.07	0.3	0.25	0.18	0.05	0.21	0.28	0.29	0.71	0	0.15	0.49	0.75	0.77	0.63	0.94	0.07	0.16	0.43	0.46	0	1.91
463	ENSG00000170214.3	<ADRA1B>	0	0	0	0	0	0	0	0	0	0	0	0	0	0	0	0	0	0	0	0	0	0	0	0	0	0	0	0	0	0	0	0	0	0	0	0	0	0	0	0	0	0	0	0	0	0	0
464	ENSG00000171873.6	<ADRA1D>	0	0	0	0	0	0	0	0	0	0	0	0	0	0	0	0	0	0	0	0	0	0	0	0	0	0	0	0	0	0	0	0	0	0	0	0	0	0	0	0	0	0	0	0	0	0	0
465	ENSG00000150594.5	<ADRA2A>	0	0	0	0	0	0	0	0	0	0	0	0	0	0	0	0	0	0	0	0	0	0	0	0	0	0	0	0	0	0	0	0	0	0	0	0	0	0	0	0	0	0	0	0	0	0	0
466	ENSG00000222040.3	<ADRA2B>	0	0	0	0	0	0	0	0	0	0	0	0	0	0	0	0	0	0	0	0	0	0	0	0	0	0	0	0	0	0	0	0	0	0	0	0	0	0	0	0	0	0	0	0	0	0	0
467	ENSG00000184160.6	<ADRA2C>	0.93	1.51	1.8	1.38	0	0	0.76	1.03	0	2.23	0.6	0	1.12	0	0	0	0.63	0.76	1.4	0	0.27	0.42	1.3	1	0	1.63	0	0.68	0	2.07	2.33	2.38	0	0	0	0	0.37	1.43	0	0.39	1.47	0	0	0	0	0.61	0
468	ENSG00000043591.4	<ADRB1>	0	0	0	0	0	0	0	0	0	0	0	0	0	0	0	0	0	0	0	0	0	0	0	0	0	0	0	0	0	0	0	0	0	0	0	0	0	0	0	0	0	0	0	0	0	0	0
469	ENSG00000169252.4	<ADRB2>	0	0	0	0	0	0	0	0	0	0	0	0	0	0	0	0	0	0	0	0	0	0	0	0	0	0	0	0	0	0	0	0	0	0	0	0	0	0	0	0	0	0	0	0	0	0	0
470	ENSG00000188778.3	<ADRB3>	0	0	0	0	0	0	0	0	0	0	0	0	0	0	0	0	0	0	0	0	0	0	0	0	0	0	0	0	0	0.04	0	0	0	0	0	0	0	0	0	0	0	0	0	0.09	0	0	0
471	ENSG00000173020.6	<ADRBK1>	50.83	46.22	44.67	40.17	70.23	52.76	55.65	49.55	65.11	61.83	77.39	49.48	62.09	45.96	73.51	43.24	52.14	47.07	45.98	60.16	29.72	61.88	36.83	47.46	41.12	39.49	53.62	48.79	67.61	32.71	37.82	43.81	48.2	74.12	56.17	49.35	74.52	56.81	23.64	47.07	82.82	72.67	75.67	41.61	73.3	61.38	41.77
472	ENSG00000100077.10	<ADRBK2>	0.02	0	0	0	0	0	0	0.88	0.49	0	0.54	0	0	0.51	0	0.52	0	0	0.36	0	1.91	0.42	0.27	0.67	0	0	0	0	0.27	0	0	0	0.84	0	0	0.64	0	0.26	0	0.63	0	0	0	0.39	0	0	0
473	ENSG00000130706.8	<ADRM1>	41.64	45.55	27.13	51.48	54.73	44.68	45.68	68.23	45.24	47.96	50.76	27.21	24.68	45.92	33.95	50.73	35.92	49.89	33.47	38.07	46.26	38.96	42.48	35.86	33.23	49.68	33.76	31.78	33.28	47.75	57.48	56.11	43.95	37.06	39.94	47.33	35.47	30.65	49.64	61.5	25.78	31.4	36.12	57.14	28.82	37.6	37.59
474	ENSG00000239900.7	<ADSL>	49.66	52.86	44.18	55.01	44.34	42.18	35.45	46.65	53.45	49.96	67.44	42.85	49.15	34.59	51.39	59.83	51.65	33.93	44.13	51.11	55.51	53.43	50.01	50.65	53.48	46.59	56.18	51.4	43.45	41.93	76.88	44.64	49.5	49.57	50.36	37.44	37.29	58.6	40.61	39.7	37.71	52.13	52.92	40.89	53.19	37.69	40.45
475	ENSG00000035687.9	<ADSS>	8.42	15.23	11.55	9.46	13.91	10.14	5.44	10.89	9.81	12.47	11.58	11.75	12.99	12.44	14.8	14.81	12.45	9.9	15.96	17.3	11.38	13.3	10.91	10.07	12.58	8.12	12.35	13.73	11.64	10.78	5.25	11.56	9.35	10	12.79	5.89	15.19	13.84	4.72	10.26	17.3	9.95	10.89	11.46	13.7	11.63	16.82
476	ENSG00000185100.6	<ADSSL1>	9.88	11.99	11.92	14.01	11.3	13.42	10.14	9.02	12.63	9.3	10.51	10.11	10.55	10.53	18.69	7.64	12.47	10.61	13.67	11.11	7.45	17.17	8.51	15.62	26.72	7.46	10.36	9.55	10.82	7.76	6.51	10.34	11.37	15.53	8.18	6.11	7.58	14.69	5.09	13.41	26.01	14.1	22.43	14.92	16.57	11.89	12.13
477	ENSG00000111863.8	<ADTRP>	0.23	0.41	0.82	0.16	0.25	0.9	0.67	0.68	0.65	1.03	0.31	0.83	0.34	0.07	1.17	0.41	0.09	0.26	0.22	0.81	1.09	0.48	0.52	0.16	0.43	0.49	0.12	0.26	1.18	0.25	0.23	0.35	0	0.48	0.38	0.44	0.38	0.38	0.68	0.58	1.02	0.4	0.98	0.13	1.15	0.5	0.37
478	ENSG00000106624.4	<AEBP1>	162.46	298.03	288.99	363.45	183.84	317.53	313.51	381.78	254.28	286.34	269	155.37	290.25	190.08	260.24	470.23	179.96	210.42	145.27	129.34	297.33	290.17	213.66	269.25	193.13	238.63	373.2	307.56	346.54	174.28	215.75	190.54	262.39	134.89	328.07	270.43	393.33	382.06	222.78	196.96	485.43	384.96	319.32	124.49	218.2	239.42	260.34
479	ENSG00000139154.10	<AEBP2>	19.73	20.47	19.8	16.61	19.01	33.24	15.62	20.8	30.23	21.03	12.94	24.53	26.02	19.91	12.59	16.15	17.64	19.11	17.32	28.91	22.38	26.76	22.05	21.78	26.4	25.03	19.32	33.66	28.29	23.42	14.98	18.29	25.5	18.92	27.29	24.57	30.18	28.7	20.58	17.12	25.7	17.66	19.88	19.47	19.96	20.37	26.01
480	ENSG00000181026.13	<AEN>	1.62	2.23	2.21	0.69	1.78	0.52	1.42	2.13	1.2	1.24	2.74	2.21	1.5	0.28	1.41	5.43	1.19	2.34	1.74	1	0.91	1.03	1.4	1.09	0.68	1.19	2.81	0.68	1.67	1.04	5.4	0.9	1.35	1.33	1.39	0.95	2.17	0.96	1.25	2.06	2.28	2.19	1.08	0.71	3.16	2.59	3.32
481	ENSG00000104964.10	<AES>	1113.59	1020.81	1411.94	1270.04	1075	1381.75	1174.56	945.6	1100.63	1111.6	914.99	990.05	985.71	932.06	1095.15	918.39	1084.65	1023.42	789.94	786.39	691.82	824.49	875.55	1022.86	981.4	988.24	816.2	1120.97	1064.6	1036.36	831.7	889.2	691	986.64	865.67	941.01	849.04	1455.12	1256.97	999.02	924.36	733.82	901.03	941.71	1083.35	849.79	811.88
482	ENSG00000250232.1	<AF196779.12>	0	0	0	0	0	0	0	0	0	0	0	0	0	0	0	0	0	0	0	0	0	0	0	0	0	0	0	0	0	0	0	0	0	0	0	0	0	0	0	0	0	0	0	0	0	0	0
483	ENSG00000196526.6	<AFAP1>	0.7	9.76	0.39	2.79	0.62	0.97	0.61	3.49	2.04	2.82	5.41	4.7	1.86	0.83	1.86	3.54	8.61	0	1.62	2.77	3.66	0	3.36	0.44	0.29	5.96	1.58	0.95	1.85	0.16	2.08	0	1.66	3.3	0	2.65	2.97	7.48	0.11	0	0.89	4.65	1.83	8.73	3.65	0.43	2.88
484	ENSG00000157510.9	<AFAP1L1>	17.69	24.52	18.12	20.81	12.85	18.98	15.74	4.83	37.78	18.31	18.46	18.78	14.8	19.82	21.77	5.8	15.95	21.71	6.12	23.67	49.5	8.79	11.1	32.55	22.43	10.21	16.07	32.38	18.19	8.24	5.38	18.08	19.99	19.16	36.81	13.76	25.2	16.22	36.31	10.09	20.18	9.43	23.7	17.13	27.88	18.62	13.01
485	ENSG00000169129.10	<AFAP1L2>	259.75	92.54	175.88	97.21	259.9	97.32	137.69	86.44	234.42	166.79	124.43	277.61	174.22	155.31	191.43	143.26	177.96	142.29	196.07	234.58	48.15	143.68	237.75	115.82	178.28	116.04	187.4	160.77	122.4	156.03	61.34	157.27	114.09	296.75	409.35	196.2	128.64	146.35	126.19	159	234.92	215.12	166.07	169.43	150.7	130.61	109.03
486	ENSG00000172493.16	<AFF1>	53.85	68.85	51.69	48.15	53.67	48.24	36.22	68.21	44.5	84.32	38.03	43.87	61.61	64.47	63.99	59.59	61.83	65.15	56.92	41.8	81.63	75.92	69.66	75.7	68.31	39.4	61.22	59.04	43.3	71.45	24.81	71.19	90.26	56.47	56.08	36.2	47.54	43.23	71.68	54.86	46.42	34	45.77	66.98	68.58	77.27	76.88
487	ENSG00000155966.9	<AFF2>	1.98	1.98	0.77	2.14	0.7	3.3	1.48	2.66	1.09	3.81	1.83	1.2	0.46	3.56	1.72	2.79	2.35	3.24	2.36	1.32	2.06	4.24	1.39	5.6	3.42	0.95	2.18	2.21	1.06	3.95	1.86	2.38	3.89	2.16	2.87	0.89	2.33	0.35	5.35	2.34	0	2.46	1.03	3.59	3.69	4.18	2.31
488	ENSG00000144218.14	<AFF3>	9.03	19.53	16.07	5.54	6.94	16.99	8.38	6.21	15.18	13.19	12.45	8.64	14.61	8.86	11.53	7.42	7.32	14.04	13.41	5.54	21.29	10.03	6.95	11.9	7.06	9.24	8.15	20.62	18.57	7.09	10.07	9.88	10.4	17.52	7.03	12	23.36	6.64	10.4	6.22	16.43	7.3	13.1	8.8	16.17	14.36	6.74
489	ENSG00000072364.8	<AFF4>	5.44	1.84	2.28	3.18	5.44	1.06	2.54	2.9	1.32	2.55	2.76	2.33	2.31	4.66	2.71	2.46	1.7	1.79	2.67	1.66	0.84	3.78	3.3	1.69	2.16	1.67	1.39	3.19	1.72	2.55	0.09	0.7	2.41	2.63	3.06	1.69	3.39	1.67	1.55	4.01	1.23	0.52	0.78	2.27	2.34	2.11	6.1
490	ENSG00000141385.5	<AFG3L2>	4.09	4.84	6.21	14.15	7.39	10.54	4.03	6.26	5.66	6.73	6.54	5.04	4.89	7.71	6.75	6.42	5.16	5.77	9.44	8.48	5.99	6.74	12.37	5.28	6.56	4.67	6.9	6.66	5.36	5.06	3.6	4.92	6.08	7.29	6.24	5.98	7.33	4.91	8.96	7.07	7.81	6.92	7.25	5.22	9.68	5.23	8.78
491	ENSG00000079557.3	<AFM>	0	0	0	0	0	0	0	0	0	0	0	0	0	0	0	0	0	0	0	0	0	0	0	0	0	0	0	0	0	0	0	0	0	0	0	0	0	0	0	0	0	0	0	0	0	0	0
492	ENSG00000183077.11	<AFMID>	68.79	49.08	77.18	48.08	42.93	71.88	81.81	38.6	95.18	61.6	50.59	75.89	82.41	55.94	78.49	52.6	65.76	61.57	51.04	52.2	58.85	56.29	46.46	50.6	72.42	59.56	59.8	108.9	89.69	55.01	45.94	52.48	50.34	48.71	54.31	94.73	86.32	60.69	61.19	55.49	70.52	61.24	106.01	50.82	62.39	49.58	45.85
493	ENSG00000081051.3	<AFP>	0	0	0	0	0	0	0	0	0	0	0	0	0	0	0	0	0	0	0	0.45	0	0.11	0	0	0	0	0	0	0	0	0	0	0	0	0	0.15	0.31	0.14	0	0	0	0	0	0	0	0	0
494	ENSG00000119844.10	<AFTPH>	33.77	22.45	23.65	18.04	32.72	27.81	23.38	30.33	27.88	22.7	19.42	35.52	25.33	28.71	18.09	21.14	26.29	25.52	22.44	30.52	23.86	26.94	29.28	24.99	28.38	29.03	26.15	24.21	24.74	26.08	27.92	25.23	29.86	25.83	33.19	24.81	26.82	24.62	24.16	25.81	25.15	27.22	27.39	29.74	24.8	21.8	24.08
495	ENSG00000038002.4	<AGA>	16	7.6	5.65	11.16	17.44	9.26	20.23	10.88	15.09	10.88	1.27	9.45	10.65	9.12	11.85	4.38	13.91	7.57	10.09	14.5	5.03	22.43	9.27	9.56	10.11	13.4	2.92	11.2	11.09	7.53	8.48	8.7	9.49	6.51	3.97	18.08	2.26	10.84	15.36	12.08	2.42	10.07	7.18	10.33	4.91	7.63	10.43
496	ENSG00000157985.13	<AGAP1>	4.78	5.91	5.64	3.29	6.53	2.31	5.33	3.14	5.61	4.55	5.21	5.53	3.49	5.71	2.39	2.88	7	2.27	6.52	4.38	5.48	5.55	2.06	3.34	5.19	3.54	5.16	2.58	3.16	5.75	6.47	1.77	2.06	3.04	4.28	3.38	2.85	10.56	5.31	4.4	4.46	3.29	1.74	5.65	4.7	4.79	2.93
497	ENSG00000204172.7	<AGAP10>	9.05	15.32	10.47	16.29	25.22	12.58	17.24	16.13	14.74	10.78	23.6	10.44	33.04	12.37	12.34	18.54	17.19	16.29	26.61	25.87	8.92	14.71	3.29	18.19	19.62	13.05	25.78	23.96	23.57	20.06	16.13	6.82	5.59	34.76	7.24	7.74	17.27	20.28	5.85	11.5	21.95	34.57	14.1	17.96	23.75	27.9	0
498	ENSG00000135439.7	<AGAP2>	2.55	0.9	2.08	1.05	2.59	1.61	1.58	1.65	1.81	1.78	2.36	2.54	1.26	5.28	3.5	2.73	2.18	0.52	1.8	1.59	0.6	3.38	0.52	1.02	1.51	0.53	0.65	1.17	2.82	0.29	2.14	2.34	0.88	0.92	0.48	2.14	1.57	2.07	1.6	0.69	0.58	1.67	3.15	1.84	1.01	2.42	1.67
499	ENSG00000133612.14	<AGAP3>	224.19	165.84	196.54	181.98	149.34	171.69	234	182.12	228.88	215.15	164.55	213.83	275.39	179.4	159.46	123.38	204.14	192.25	188.29	251.35	129.57	105.62	196.44	193.17	176.82	225.82	265.29	206.05	217.85	184.16	113.92	193.95	186.1	224.7	217.44	211.01	211.72	158.44	177.6	175.72	243.61	270.37	256.54	202.77	210.65	182.87	183.09
500	ENSG00000188234.9	<AGAP4>	31.53	23.53	25.08	26.73	7.62	25.79	22.39	15.3	23.69	30.21	33.95	27.05	38.74	44.38	25.94	27.1	18.11	29.84	19.51	53.1	5.7	33.97	30.04	28.67	35.48	31.8	45.87	21.11	32.83	28.22	25.54	20.76	27.72	30.51	30.27	8.12	27.07	31.16	23.59	30.02	50.75	63.7	57.29	24.56	36.21	16.43	28.81
501	ENSG00000172650.8	<AGAP5>	3.2	4.75	5.74	4.27	5.93	6.76	4.97	3.36	7.09	5.06	4.43	6.96	7.09	4.72	4.1	6.35	6.13	6.27	4.3	7.2	2.24	6.42	3.5	7.85	5.68	2.44	3.37	9.68	6.14	2.04	5.72	5.29	1.95	5.65	7.92	3.71	7.12	8.52	1.38	7.68	9.66	8.16	8.1	4.72	7.53	5.8	5.52
502	ENSG00000204149.5	<AGAP6>	24.99	37.63	30.19	30.82	37.05	29.62	27.23	31.93	39.27	31.11	49.87	38.52	43.9	34.29	38.62	45.6	33.54	28.9	32.31	43.74	35.86	38.82	35.8	35.86	36.15	43.27	48.84	34.5	31.98	32.79	54.64	29.66	31.7	46.91	26.45	26.04	33.96	36.09	19.64	38.91	54.96	48.33	43.13	39.73	47.27	27.38	41.53
503	ENSG00000204169.6	<AGAP7>	0	0	0	0	0	0	0	0	0	0	0	0	0	0	0	0	0	0	0	0	0	0	0	0	0	0	0	0	0	0	0	0	0	0	0	0	0	0	0	0	0	0	0	0	0	0	0
504	ENSG00000174194.11	<AGAP8>	14.36	15.3	29.48	18.78	14.01	18.96	12.34	14.66	21.3	15.6	10.96	20.18	20.29	20.38	17.82	9.25	18.69	9.95	13.85	19.78	11.57	16.55	15.99	13.49	11.41	7.28	20.57	30.84	13.81	13.29	10.16	5.38	14.44	20.56	16.65	22.16	22.1	17.36	7.39	15.9	22.05	10.69	9.9	12.43	12.02	13.51	9.97
505	ENSG00000198035.9	<AGAP9>	9.52	12.95	9.82	14.06	17.51	7.97	13.45	14.24	10.62	10.34	16.01	13.87	18.64	10.27	13.28	10.67	15.62	11.19	17.12	11.32	9.6	10.82	4.26	13.89	14.74	9.42	20.94	33.67	18.58	13.33	4.58	4.74	6.21	17.71	11.21	4.96	10.5	18.52	2.18	9.61	16.39	33.43	14.34	14.64	16.36	15.64	2.6
506	ENSG00000166748.8	<AGBL1>	0.22	0	0.19	0.09	0.04	0.38	0.29	0	0.26	0.14	0.11	0.41	0.29	0.13	0.18	0.09	0.16	0	0.07	0.47	0	0.21	0.36	0	0.05	0	0.32	0.4	0.41	0.05	0	0.09	0.13	0.16	0.14	0.38	0	0.1	0.26	0.02	0.15	0	0.68	0.06	0.09	0.24	0.15
507	ENSG00000165923.11	<AGBL2>	3.57	2.75	4.67	3.85	3.22	4.03	3.22	2.68	6.42	2.45	3.61	7.39	3.6	2.62	3.59	1.03	5.03	1.31	5.68	5.24	1.95	2.92	2.43	2.25	4.87	2.14	4.57	4.49	8.2	3.26	1.89	3.7	2.96	7.45	1.91	4.33	4.44	4.98	4.85	4.32	5.13	6.16	4.9	4.29	6.86	5.77	1.76
508	ENSG00000146856.10	<AGBL3>	6.19	7.04	14.48	9.5	7.32	11.68	7.24	3.78	15.14	7.21	4.25	12.39	11.86	9.56	7.46	4.58	8.37	5.97	10.22	18.01	6.08	9.99	9.51	8.13	9.21	9.18	6.92	6.26	8.7	5.71	7.71	6.53	6.88	11.44	13.61	7.29	16.5	13.35	5.14	7.29	15.18	15.98	9.46	8.79	11.7	5.95	6.01
509	ENSG00000186094.12	<AGBL4>	0.52	0.31	0.67	0.42	0.42	0.54	0.23	0.26	0.83	0.27	0.11	0.58	0.46	0.37	0.51	0.13	0.36	0.48	0.56	0.16	0.38	0.65	0.27	0.56	0.34	0.22	0.11	0.72	0.65	0.29	0	0.26	0.31	0.45	0.07	0.4	0.58	0.19	0.39	0.11	0.78	0.1	0.3	0.11	0.04	0.33	0.37
510	ENSG00000084693.11	<AGBL5>	26.12	15.2	20.48	16.45	16.79	22.94	23.4	18.13	27.08	19.29	17.05	24.79	25.62	20.2	17.26	15.69	17.19	17.73	19.4	23.98	14.44	17.16	22.12	17.03	21.77	21.52	21.95	22.05	22.12	18.02	14.36	15.02	15.81	20.61	24.56	20.74	20.31	21	22.31	17.77	24.78	26.81	21.9	17.42	15.6	17.14	16.7
511	ENSG00000204305.9	<AGER>	24.33	22.22	36.57	29.49	32.26	40.97	28.13	18.9	41.96	31.21	38.9	55.34	45.83	33.45	36.07	29.24	30.72	23.35	36.07	73.61	24.92	41.19	25.21	25.48	35.23	33.01	31.72	31.45	33.12	23.6	22	23.67	20.66	53.46	32.07	35.93	39.75	42.78	22.72	24.25	71.13	61.21	36.05	22.7	36.12	31.21	26.63
512	ENSG00000173744.13	<AGFG1>	88.77	89.5	64.15	74.19	82.08	63.62	57.8	71.34	54.73	74.39	85.49	71.85	51.95	83.52	64.21	83.52	98.47	76.77	82.88	53.48	83.45	67.38	60.1	105.34	62.83	83.71	67.86	62.49	44.38	84.11	99.72	69.25	69.81	66.9	72.42	62.47	44.99	60.31	74.96	81.04	53.02	45.64	67	87.62	71.7	72.12	112.58
513	ENSG00000106351.8	<AGFG2>	61.26	95.84	43.39	72.07	46.47	40.32	39.35	56.35	44.02	49.67	93.8	40.92	35.71	57.13	50.64	30.98	74.78	100.4	57.38	49.25	71.39	55.11	60.76	68.61	59.86	58.17	41.34	44.91	42.14	56.5	71.15	79.46	62.44	66.85	37.6	36.84	39.4	35.56	68.54	73.32	32.7	32.49	48.44	100.96	69.4	83.85	45.96
514	ENSG00000164252.8	<AGGF1>	0	0	0.42	0	0	0	0	0	0.88	0	0	0.32	0	0	0	0	0	0.46	0.25	0	0	0	0	0.2	0	0	0	0	0	0	0	0	0	0	0.15	0	0	0	0	0.37	0	0	0	0	0	0	0
515	ENSG00000006530.11	<AGK>	2.73	9.33	4.17	9.74	10.37	10.25	4.45	3.73	4.4	5.7	5.86	3.48	4.7	2.37	7.41	6.59	4.35	5.88	6.01	4.57	5.15	8.05	4.53	6.73	4.79	3.01	2.88	2.8	4.02	6.84	11.36	3	2.61	2.14	3.92	10.9	5.46	3.28	8.8	6.96	6.2	4.61	3.73	11.46	8.63	5.23	7
516	ENSG00000162688.11	<AGL>	11.94	11.94	11.2	9.84	9.51	15.77	9.06	11.08	14.39	11.66	8.48	13.46	11.91	18.35	10.72	5.58	10.86	11.83	11.85	13.57	14.42	10.95	11.25	12.75	13.23	12.21	8.5	12.03	12.52	10.17	7.65	12.13	11.06	12.91	9.97	13.45	16.62	10.18	8.48	11.84	15	9.52	11.9	14.62	13.7	11.85	15.08
517	ENSG00000116771.5	<AGMAT>	0	0	0	0	0	0	0	0	0	0	0	0	0	0	0	0	0	0	0	0	0	0	0	0	0	0	0	0	0	0	0	0	0	0	0	0	0	0	0	0	0	0	0	0	0	0	0
518	ENSG00000187546.9	<AGMO>	0	0	1.16	0.33	0	0.41	0	0	0	0.63	0	0	0	0.48	0.42	0	0.72	0.37	0	0.73	0.2	0.14	0	0	0.59	0.42	0	0	0	0	0	0.76	0	0	0	0.25	0	0.47	0.42	0.56	0	0.29	1.15	0.39	0	0	0
519	ENSG00000092847.6	<AGO1>	2.19	0	0	1.19	0	0.81	0	0	0	0	0	0	0	0	0	0	0	0	0	0	0	0.25	0	0	0	0	0	0	0	0	0	0	0	0	0.17	0	0	0	0.61	0	0	0	0	0	0	0	0
520	ENSG00000123908.7	<AGO2>	12.03	8.53	8.59	6.82	3.41	3.67	16.3	4.32	3.32	10.09	1.05	10.67	6.11	2.11	6.37	14.62	7.04	3.39	6.9	2.16	3.52	8.54	3.07	7.25	2.83	8.96	17.19	4.56	11.64	5.82	9.68	7.94	2.77	8.97	7.65	4.67	4.08	2.02	2.82	4.82	4.72	4.72	11.87	5.03	8.74	3.31	12.83
521	ENSG00000126070.14	<AGO3>	22.01	11.85	11.76	9.68	11.65	9.05	12.18	9.52	12.24	12.92	11.47	19.84	16.4	16.37	12.22	12.5	10.61	11.08	13.83	16.91	12.04	11.65	14.05	10.41	13.41	9.44	12.86	11.96	12.07	12.29	16.54	11.91	11.02	14.95	16.26	8.85	13.91	14.43	8.1	14.03	18.3	15.75	11.12	11.2	14.18	9.43	17.39
522	ENSG00000134698.10	<AGO4>	2.19	2.39	5.81	1.19	0	2.4	1.31	0.86	4.68	4.84	1.51	3.13	6.97	5.19	3.91	0	2.16	5.69	2.14	1.09	2.46	3.86	2.45	2.43	8.14	2.05	0	0	0.91	1.84	2.87	0	0.73	3.35	8.06	1.31	0.96	0	3.71	4.04	1.3	1.79	0	1.93	7.8	4.49	5.26
523	ENSG00000204310.6	<AGPAT1>	191.51	201.52	202.07	202.43	156.25	163.52	237.13	154.65	207.67	161.81	241.66	251.94	165.58	183.48	161.44	157.44	227.62	199.03	196.71	211.1	166.43	132.63	143.13	171.64	175.99	177.6	182.95	198.39	203.12	195.03	254.6	182.39	141.84	201.48	197.47	215.85	201.83	149.24	225.71	228.33	181.53	176.97	185.62	236.12	209.29	187.05	153.78
524	ENSG00000169692.8	<AGPAT2>	45.61	100.79	84.25	82.87	35.42	209.45	84.76	88.46	93.72	62.91	122.97	45.92	49.65	143.59	79.82	58.56	75.43	68.35	72.75	61.08	414.64	92.21	42.6	202.11	95.57	64.05	65.9	62.79	70.71	87.6	97.47	101.66	67.72	89.47	46.68	95.42	117.53	131.85	96.68	91.13	131.89	44.13	88.15	62.3	75.35	81.84	373.51
525	ENSG00000160216.14	<AGPAT3>	44.89	27.64	36.92	38.29	64.25	37.08	43.69	33.45	49.03	36.66	34.11	53.66	37.88	42.4	47.5	45.29	37.67	41.24	39.66	62.81	26.88	58.56	35.85	33.55	41.89	38.96	27.49	28.61	34.33	43.92	44.35	49.2	30.12	42.16	34.1	43.55	32.6	33.54	31.09	45.07	36.76	46.64	33.89	45.16	36.21	39.76	26.63
526	ENSG00000026652.9	<AGPAT4>	35.39	39.9	39.96	29.75	23.62	35.63	36.35	25.02	31.94	41.02	32.11	35.68	45.83	24.55	49.94	38.92	42.22	32.78	33	43.31	27.76	16.7	36.49	32.97	34.81	32.49	37.88	47.51	30.24	36.53	12.7	28.42	20.48	23.01	46.95	34.68	46.84	35.27	32.94	41.32	42.2	26.34	49.21	30.33	36.41	27.9	25.99
527	ENSG00000155189.7	<AGPAT5>	1.49	1.4	1.52	2.46	2.18	0.45	0.25	0.92	0.86	0.58	0	0	0.29	0.73	0.94	2.16	1.19	2.03	1.23	1.04	0	1.18	0.85	0.96	0.45	1.14	1.05	2.56	0.74	0.44	2.14	0	1.06	1.56	1.6	0.38	0.54	2.47	2.53	1.08	2.62	2.72	2.54	0.59	3.35	0.92	2.64
528	ENSG00000158669.7	<AGPAT6>	137.57	162.79	126.43	102.13	130.45	154.13	110.77	155.9	146.01	129.95	110.87	135.18	114.56	140.82	125.81	132.29	97.71	112.1	103.55	133.95	135.87	122.72	115.52	129.02	99.59	143.09	136.2	140.05	131.85	123.31	205.81	140.72	108.34	131.54	191.34	122.77	113.42	126.4	108.87	129.82	144.19	124.92	141.57	130.31	149.99	130.09	155.45
529	ENSG00000138678.6	<AGPAT9>	4.67	2.18	5.62	1.95	3.41	7.1	2.67	1.12	0.09	1.39	4.48	2.24	6.33	5.39	7.66	1.74	3.28	1.25	2.9	3.08	1.37	1.86	4.03	2.65	0.74	1.52	3.97	7.52	8.72	0.22	0	1.86	0.71	0.29	4.88	0.96	3.03	0.35	2.29	1.54	2.39	0	5.54	3.29	9.82	0	5.55
530	ENSG00000018510.8	<AGPS>	0	2.43	1.05	2.44	1.04	0.65	2.77	2	3.39	2.7	3.14	3.98	1.05	3.93	3.24	0	1.28	0.83	2.81	1.94	2.95	0.78	1.1	1.54	1.12	3.08	0.9	0.42	0.22	2.29	1.67	0.29	0.29	1	1.96	1.16	0.98	1.64	2.99	2.91	2.37	1.19	1.6	3.46	1.1	1.81	0.42
531	ENSG00000106541.7	<AGR2>	0.4	1.3	0.95	0.13	0	0.95	0.95	0.57	0	0	0.22	0.27	0	0	0.28	0	0	0	0.78	0	0.53	0.48	0.39	0.94	0.23	0	0.26	0.63	0.91	0.18	0	0	0.29	0	0.15	0.65	0.58	1.2	0	0.46	7.19	0.34	0	0.41	0	0.78	0.18
532	ENSG00000173467.4	<AGR3>	0	0	0	0	0	0	0	0	0	0	0	0	0	0	0	0	0	0	0	0	0	0	0	0.44	0	0	0	0	0.43	0	0	0	0	0	0	0.75	0	0	0	0.43	0	0	0	0	0	0	0
533	ENSG00000188157.9	<AGRN>	23.79	19.82	36.43	14.73	29.48	31.72	29.16	14.33	46.71	25.44	17.45	42.81	41.01	19.71	20.72	11.52	27.17	12.68	21.35	31.34	9.11	24.16	22.42	22.65	24.78	43.84	22.76	35.78	26.66	13.73	21.68	16.7	8.58	38.62	37.09	28.17	26.23	22.34	8.1	10.72	42.57	23.54	31.8	18.04	22.32	31.56	18.58
534	ENSG00000159723.4	<AGRP>	0	0	0	0	0	0	0	0	0	0	0	0	0	0	0	0	0	0	0	0	0	0	0	0	0	0	0	0	0	0	0	0	0	0	0	0	0	0	0	0	0	0	0	0	0	0	0
535	ENSG00000135744.7	<AGT>	0	0	0	0	0	0	0	0	0	0	0	0	0	0	0	0	0	0	0	0	0	0	0	0	0	0	0	0	0	0	0	0	0	0	0	0	0	0	0	0	0	0	0	0	0	0	0
536	ENSG00000135049.11	<AGTPBP1>	13.68	13.85	14.42	12.7	14.01	14.73	13.35	15.36	13.93	10.54	12.34	10.16	14.85	23.41	13.26	14.29	13.57	12.72	16.1	17.74	13.88	16.77	16.17	14.47	16.67	16.16	15.21	13.83	10.39	17.73	13.41	10.91	15.9	20.6	11.55	11.78	13.88	17.84	11.49	15.47	15.39	13.38	13.63	17.55	20.26	15.01	13.43
537	ENSG00000144891.13	<AGTR1>	11.51	33.43	9.19	11.83	7.46	14.35	6.39	19.51	14.47	28.41	15.58	3.89	5.66	17.06	13.1	4.86	14.92	15.2	11.67	9.64	55.02	26.46	40.88	31.63	13.28	19.63	28.56	10.87	10.46	15.2	13.58	47.87	45.52	17.62	13.13	8.63	22.06	22.32	21.23	11.84	8.21	2.98	29.95	20.64	20.19	18.41	93.29
538	ENSG00000180772.6	<AGTR2>	0	0	0	0	0	0	0	0	0	0	0	0	0	0	0	0	0	0	0	0	0	0	0	0	0	0	0	0	0	0	0	0	0	0	0	0	0	0	0	0	0	0	0	0	0	0	0
539	ENSG00000177674.11	<AGTRAP>	37.13	48.04	43.6	78.24	29.94	44.44	33.5	57.98	39.17	52.17	97.47	35.8	34.25	56.77	63.48	56.84	62.84	60.06	58.36	29.29	53.84	55.78	33.76	64.11	58.96	46.44	39.13	40.58	43.84	46.72	39.85	62.06	79.51	48.83	21.6	46.16	40.19	50.01	61.35	48.61	40.99	35.62	48.27	51.51	68.33	60.45	54.32
540	ENSG00000172482.4	<AGXT>	0	0.18	0	0.42	0	0	0.11	0	0.09	0	0.04	0	0	0.18	0	0.3	0	0.09	0.33	0	0	0	0	0	0.11	0	0.28	0.33	0.09	0	0.06	0	0	0	0	0.02	0	0.09	0	0.04	0.07	0	0	0.04	0.07	0	0
541	ENSG00000113492.9	<AGXT2>	0	0.07	0.25	0	0	0	0	0	0	0	0	0.14	0	0	0	0	0	0.07	0	0	0	0	0	0	0	0	0	0	0.07	0	0	0	0.07	0	0	0	0.03	0	0	0	0.15	0	0.09	0.06	0	0	0
542	ENSG00000153207.10	<AHCTF1>	34.58	34.23	23.02	41.13	43.74	40.37	19.04	30.96	41.38	32.85	40.19	47.73	36.81	71.45	34.16	45.82	39.15	29.69	28.53	24.29	22.11	53.11	52.29	27.93	54.81	18.58	48.84	22.46	33.89	33.86	38.95	23.8	33.88	19.06	53.71	36.44	30.48	35.2	26.55	31.39	31.05	45.11	24.29	55.19	42.05	43.57	41.68
543	ENSG00000101444.8	<AHCY>	4.52	9.7	2.43	8.81	6.06	7.1	5.58	6.74	3.45	6.55	12.34	4.22	7.26	11.94	5.73	11.32	11.44	10.58	11.74	6.04	4.88	10.2	6.02	8.51	7.66	4.54	4.04	7.1	4.07	10.07	7.99	6.56	7.36	7.69	4.88	5.93	6.91	5.98	10.71	8.81	5.01	3.44	6.06	5.46	5.67	14.68	8.6
544	ENSG00000168710.13	<AHCYL1>	91.66	106.95	73.45	102.36	113.83	97.61	90.76	133.01	94.62	97.1	81.09	100.37	88.87	105.63	101.46	99.4	90.89	114.96	99.54	86.6	85.04	104.56	102.09	105.06	112.33	84.28	79.31	85.84	77.48	108.96	92.94	96.61	104.57	85.8	87.62	92.93	97.34	76.27	103.38	114.18	88.58	68.35	95.61	108.72	102.22	107.18	105.12
545	ENSG00000158467.12	<AHCYL2>	38.98	32.35	28.9	23.7	45.01	31.88	33.55	21.22	44.55	31.88	24.93	49.41	29.53	31.14	44.77	19.05	28.72	36.47	21.29	45.2	38.57	28.24	28.82	32.95	34.36	30.04	29.14	48	49.87	30.53	15.83	28.55	32.25	43.56	31.26	47.6	42.59	21.82	24.07	38.79	40.34	25.65	48.95	30.58	31.06	43.2	23.48
546	ENSG00000126705.9	<AHDC1>	24.01	20.78	22.14	21.37	21.77	26.15	16.84	16.86	24.01	22.04	17.25	21.36	16.78	28.31	21.48	9.67	21.04	26.28	14.43	22.22	10.16	16.15	25.87	20.35	20.13	12.1	15.7	30.4	19.88	12.69	7.37	20.68	15.68	22.34	21.83	32.48	19.39	13.12	26.09	16.66	16.79	11.43	26.9	14.62	16.08	25.7	14.08
547	ENSG00000135541.16	<AHI1>	35.6	53.49	46.65	59.79	48.76	52.29	40.34	57.87	60.98	49.74	65.06	39.88	48.6	30.55	57.65	60.35	26.79	44.28	57.23	52.81	42.42	59.07	52.62	41.41	39.01	36.14	48.74	42.79	44.26	45.61	84.18	35.34	48.24	57.78	39.12	31.75	58.35	47.06	17.63	35.16	72.7	50.43	67.36	62.32	42.81	52.82	61.07
548	ENSG00000124942.9	<AHNAK>	1487.39	1181.46	1331.42	1260.94	1331.98	1480.03	1271.83	1045.41	1250.04	1251.75	1277.85	1351.23	1075.77	2137.19	1283.34	935.71	1370.87	1742.17	1360.75	1439.87	681.69	1361.39	1365	1397.34	1521.85	1040.49	1053.44	1162.83	1137.72	1643.36	320.16	1247.16	1761.23	1686.3	1510.56	1237.1	1154.19	1413.02	1387.57	1541.1	878.53	1360.42	1125.18	1323.03	1691.27	1569.91	1086.6
549	ENSG00000185567.6	<AHNAK2>	32.89	97.98	75.2	32.84	43.86	76	53.47	42.18	68.64	59.03	29.77	48.08	33.9	43.41	54.69	13.38	44.31	47.45	17.48	42.83	113.56	37.92	22.14	73.96	42.43	59.47	39.73	105.86	65.96	53.08	39.23	51.28	34.08	97.6	43.24	45.51	88.35	73.15	111.58	64.38	51.64	16.91	91.37	62.17	71.33	60.75	62.79
550	ENSG00000106546.8	<AHR>	33.49	19.01	52.37	9.17	20.49	28.53	23.14	7.42	20.09	18.85	13.38	40.94	55.38	14.04	19.19	22.25	12.76	11.32	33.63	49.35	4.19	23.7	16.29	9.36	23.95	21.55	14.1	47.77	43.52	7.84	4.84	15.24	25.37	32.26	31.88	19.23	52.74	41.12	11.99	12.93	42.43	55.71	34.66	21.32	28.8	16.79	15.06
551	ENSG00000063438.12	<AHRR>	4.26	2.21	2.35	0.4	1.43	1.2	5.62	0.86	0.16	1.24	2.51	6.43	0.52	5.01	0.51	1.77	0	0.85	0.27	10.61	0	0.46	0.3	19.8	0.34	0.55	4.55	0.77	1.08	13.95	1.65	0.11	1.7	0.78	3.4	0.53	1.42	9.64	0	1.58	7.67	2.79	2.54	0.85	0	1	0.88
552	ENSG00000100591.3	<AHSA1>	43.15	133.43	89.03	34.81	42.09	55.23	52.25	19.44	68.64	90.71	42.24	75.15	69.97	45.69	43.62	55.92	67.6	56.34	60.15	46.53	56.26	32.88	75.44	71.78	77.86	49.99	97.49	37.76	67.86	51.46	83.52	47.39	44.75	69.65	261.56	58.71	77.65	55.66	61.11	42.84	67.72	91.44	67.54	61.15	61.86	33.04	49.85
553	ENSG00000173209.18	<AHSA2>	199.48	175.24	226.38	178.89	252.33	249.74	157.25	171.07	234.48	255.72	167.02	167.07	342.96	172.03	301.61	166.63	179.89	184.54	158.83	270.54	178.27	336.65	258.38	271.59	225.49	242.68	171.31	207.73	253.04	182.8	106.42	234.34	175.68	357.12	316.82	216.79	279.26	290.07	91.5	160.87	358.59	320.83	308.15	172.55	241.35	196.88	225.13
554	ENSG00000145192.8	<AHSG>	0	0	0	0	0	0	0	0	0	0	0	0	0	0	0	0	0	0	0	0	0	0	0	0	0.09	0	0	0	0	0	0	0	0	0.1	0	0	0	0	0	0	0	0	0	0	0	0	0
555	ENSG00000169877.5	<AHSP>	0	0	0.51	0	0.7	0	0.47	0	0	0	0	0	0	0	2.4	0	0	0	0	0	0.4	0	0.43	0.44	0	0	0	0	0	0	0	0	0.58	0	0	0.71	0	0	0	0.43	0	0	0	0.61	0	0	2.4
556	ENSG00000111732.6	<AICDA>	0	1.46	0	0	0.46	1.31	0.16	0	0.14	0.14	0	0	0.12	0.09	1.56	0	0	0.57	0.29	0.07	0.91	0.71	0.39	0.11	0.25	0	0.37	0.16	0.39	0	0.3	0	0.71	0	0.33	0.4	0.42	0.87	0.26	0.26	0.41	0.29	0	0.59	0.19	0.26	0.27
557	ENSG00000186063.8	<AIDA>	2.77	1.53	1.47	2.32	4.1	0.84	3.24	3.18	2.52	1.78	2.02	3.11	2.55	1.94	2	1.81	1.19	2.58	1.87	2.11	1.86	2.53	2.81	2.18	2.56	2.55	1.53	3.84	1.45	3.35	0.71	1.99	3.72	2.54	2.01	1.89	3.36	1.59	1.44	3.17	2.18	2.57	2.2	4.05	3.12	3.6	3.45
558	ENSG00000204472.8	<AIF1>	66.47	37.59	44.72	64.31	62.05	66.16	78.92	40.29	79.64	50.01	52.99	56.74	42.71	86.09	65.18	47.35	61.63	45.09	55.05	25.97	40.78	47.36	47.58	62.77	52.72	65.86	42.77	83.2	104.6	48.55	42.46	68.07	36.19	57.93	41.45	87.26	50.15	91.2	33.99	47.13	58.61	79.2	67.22	59.03	49.83	62.76	38.38
559	ENSG00000126878.8	<AIF1L>	41.06	23.86	25.71	17.93	55.94	20.93	31.81	25.33	20.82	35.1	28.96	38.94	27.86	28.62	37.38	36.61	23.72	22.67	30.39	57.5	10.05	22.16	27.73	18.93	21.3	27.91	21.15	23.17	18.21	34.75	12.51	10.93	16.15	21.17	28.98	25.66	16.61	23.31	16.65	40.07	42.2	18.27	29.01	23.37	24.73	18.73	27.69
560	ENSG00000156709.9	<AIFM1>	4.45	16.06	14.23	11.11	5.25	12.58	5.71	12.38	7.05	12.72	18.77	4.91	11.13	7.32	6.21	13.42	5.97	14.32	9.89	13.06	15.13	6.21	9.03	15.13	9.93	18.64	13.44	11.22	16.61	8.51	25.3	9.35	15.4	12.23	6.81	9.61	6.51	22.74	7.39	9.44	17.45	12.72	16.22	8.02	9.29	9.47	10.24
561	ENSG00000042286.10	<AIFM2>	1.62	1.37	2.12	2.61	1.5	6.56	3.53	2.66	1.92	1.76	2.51	1.33	1.72	2.46	1.33	1.79	1.35	2.82	1.82	1.92	5.57	1.79	1.62	3.41	1.6	1.36	1.05	1.37	1.63	3.82	1.78	1.33	1.7	1.5	0.55	1.51	2.26	2.46	1.84	2.8	2.15	1.15	0.77	2.36	3	1.9	4.53
562	ENSG00000183773.11	<AIFM3>	1.81	3.96	4.81	1.14	1.37	3.1	5.12	1.78	3.36	3.53	2.98	5	2.68	2.73	2.97	2.46	3.27	2.32	3.32	1.04	2.57	0.78	1.19	2.29	1.26	3.28	4.34	1.74	4	1.78	2.7	2.08	1.84	3.11	2.22	3.74	2.82	3.94	2.03	3.04	3.82	7.3	4.65	3.16	4.25	1.89	1.81
563	ENSG00000146416.12	<AIG1>	45.8	31.58	46.18	29.35	65.78	60.27	62.39	30.46	69.51	31.27	28.96	60.38	50.28	50.25	45.21	32.64	41.33	40.51	40.42	63.28	31.51	48.44	52.3	34.75	46.79	49.5	38.09	56.52	56.49	36.9	33.36	41.25	38.31	33.36	52.32	62.69	47.12	50.41	43.59	37.57	61.25	64.73	48.11	42.09	34.78	32.5	33.45
564	ENSG00000112297.10	<AIM1>	2.14	0.18	0.42	0.9	1.36	1.49	0.92	0.92	0.35	0.27	0.36	0.28	0.21	1.76	0.39	0.79	0.76	0	0	0	0.16	0.37	0.41	0.42	0.18	0.29	0.23	0	2.19	1	0.32	0.35	0.53	0	0.46	0.18	1.05	0.16	0.04	0.83	2.28	0.53	0	0	0.99	1.13	1.52
565	ENSG00000176092.9	<AIM1L>	0.2	0.67	0.46	0.33	0.35	0.61	0.45	0.28	0.25	0.68	0.51	0.3	0.29	0.2	0.09	0	0.38	0.39	0.11	0.09	0.62	0.57	0.52	0.07	0.47	0.15	0.9	0.05	0.74	0.47	0.28	1.14	0.4	1.23	0.05	0.04	0.07	0.44	0.31	0.28	8.83	0.22	0.85	1.11	0.28	1.05	0.55
566	ENSG00000163568.9	<AIM2>	1.69	1.13	0.77	0.16	0.77	1.83	1.24	0.99	0.32	2.18	0.44	1.13	0.64	0.26	0.3	0.94	0.96	0.11	0.83	0.45	0.89	0.78	0.89	1.63	0.83	0.68	2.88	1.23	2.28	0.35	1.03	1.05	1.04	1.99	1.15	1.6	0.66	1.74	0.52	1.13	0.87	2.74	0.87	0.63	0.69	2.16	2.18
567	ENSG00000164022.12	<AIMP1>	58.26	65.9	61.54	66.64	73.93	59.75	60.48	75.65	63.63	50.63	62.69	78.74	62.42	62.71	56.02	62.14	48.31	74.62	63.53	52.2	55.64	87.28	62.24	55.41	59.7	61.23	46.61	49.8	53.17	82.54	58.11	65.9	69.74	57.14	45.73	66.57	59.33	64.05	72.64	74.25	36.23	37.1	45.48	68.9	51.72	71.14	76.35
568	ENSG00000106305.5	<AIMP2>	0	5.11	1.66	4.2	3.91	4.01	2.77	4.65	0.16	2.77	9.77	1.89	2.81	1.67	5.07	5.48	4.64	5.93	2.16	2.79	2.39	6.24	3.09	2.09	4.76	0.9	4.34	2.12	2.01	4.49	5.74	3.02	3.78	6.93	0.17	3.16	2.96	5.58	1.18	4.79	2.03	2.82	4.79	6.91	6.35	5.21	4.6
569	ENSG00000110711.5	<AIP>	4.83	7.47	5.85	5.86	6.23	9	4.86	9.37	6.7	9.37	7.82	5.41	9.53	6.92	9.32	5.76	9.16	7.33	2.96	6.9	5.97	5.78	5.56	10.66	6.27	6.03	8.13	9.36	8.04	3.93	5.94	4.77	10.88	9	8.44	3.78	8.61	6.99	3.8	7.55	4.93	7.87	5.96	12.91	9.15	6.29	9.09
570	ENSG00000129221.10	<AIPL1>	0	0	0	0	0	0	0	0	0	0	0	0	0	0	0	0	0	0	0	0	0	0	0	0	0	0	0	0	0	0	0	0	0	0	0	0	0	0	0	0	0.15	0	0	0	0	0.07	0
571	ENSG00000160224.12	<AIRE>	0.61	0.32	1.09	1.27	1.25	0.5	1.39	0.29	0.88	0.94	1.54	1.86	0.34	0.62	1.08	1.44	0.76	0.53	0.58	1.42	0.15	0.99	0.99	0.44	1.53	0.66	1.18	1.05	0.99	0.18	0.19	0.87	0.31	0.64	0.67	0.91	1.59	0.71	0.31	0.87	1.18	2	1.32	0.48	0.14	0.92	0.82
572	ENSG00000196581.6	<AJAP1>	1.06	0.32	0.49	0.47	1.13	1.42	0.86	0.59	0.84	0.45	0.91	0.95	0.83	1.08	1.63	0.39	0.36	0.63	0.44	0.64	0.78	1.43	0.37	1.7	1.05	0.6	0.53	0.77	0.63	0.55	0.94	0.92	0.37	0.52	1.03	1	0.79	0.58	0.63	0.58	1.35	0.24	1.27	1.06	0.92	1.5	0.44
573	ENSG00000129474.11	<AJUBA>	15.85	8.88	15.81	9.59	18.27	19.3	14.28	7.75	24.31	13.4	7.93	16.47	16.99	16.2	6.65	3.47	9.81	7.08	12.83	18.2	11.97	12.98	9.43	13.53	12.83	15.67	15.42	13.16	14.44	9.84	8.31	7.26	10.13	24.85	15.02	15.87	18.69	12.96	8.02	13.25	26.53	12.17	15.68	8.04	13.63	6.64	4.05
574	ENSG00000106992.13	<AK1>	213.92	227.61	271.7	183.68	265.51	315.41	368.18	205.26	360.37	193.54	244.1	286.68	209.12	217.11	215.02	264.9	199.53	177.73	187.96	339.61	173.71	171.09	135.11	226.8	173.99	294.94	251.01	248.17	277.64	178.87	247.17	316.51	175.27	257.95	235.37	298.45	172.49	283.54	169.73	209.11	267.76	336.81	223.29	212.47	187.2	168.17	167.49
575	ENSG00000004455.12	<AK2>	125.13	110.15	102.38	131.5	136.21	115.55	135.59	125.33	114.85	102.65	121.58	122.05	110.89	117.17	111.74	150.42	108.16	118	117.13	121.45	138.13	114.48	126.69	116.54	110.2	91.72	105.32	99.24	109.75	122.22	194.31	110.54	107.69	120.64	90.06	107.83	112.42	120.21	104.15	115.85	125.65	142.02	105.28	107.16	113.71	113.62	103.16
576	ENSG00000147853.12	<AK3>	87.49	85.56	61.79	69.88	97.18	84.8	63.47	93.64	78.9	87.13	54.39	102.88	86.58	81.45	80.81	89.44	74.47	87.89	107.22	83.09	101.34	86.82	86.1	73.04	93.77	84.92	69.6	80.88	73.1	110.96	60.91	97.51	97.16	70.32	88.92	82.82	94.54	62.49	74.83	92.08	67.06	78.66	81.79	85.71	70.39	100.42	87.86
577	ENSG00000162433.10	<AK4>	25.33	18.51	4.25	10.15	12.04	18.3	14.05	12.22	7.72	11.26	14.85	14.75	12.2	12.64	18.51	20.33	15.24	8.09	14.1	9.5	17.81	13.12	10.64	15.49	14.05	15.27	23.78	17.62	8.86	20.59	10.45	7.04	5	8.88	14.45	10.83	11.11	12.2	19.6	20.11	18.2	12.09	17.25	13.17	10.17	5.8	23.5
578	ENSG00000154027.14	<AK5>	108.09	31.26	67.48	28.92	107.74	57.54	117.54	19.73	84.84	47.96	23.82	138.55	73.21	33.5	89.03	30	44.02	36.69	55.91	127.16	22.15	43.19	51.58	28.02	48.72	63.72	43.2	96.7	89.25	56.63	18.9	48.39	30.01	35.9	85.31	118.19	69.76	70.59	33.08	49.52	70.74	68.71	48.65	34.29	56.62	35.62	11.45
579	ENSG00000140057.4	<AK7>	0.34	0.27	0.82	1.14	0.44	0.38	0.67	0.5	1.25	1.19	0.65	0.25	1.14	0.48	0.39	0	0.81	0.9	0.96	0	0.95	0.12	0.21	0.53	0.25	1.83	0.83	0.77	0.48	0.35	1.01	0.9	0.49	0.69	1.05	0.29	0	0.44	0.31	0.13	1.14	1.05	0	0.8	1.68	1.57	1.14
580	ENSG00000165695.5	<AK8>	0.52	1.1	1.56	4.09	0.28	1.4	2.77	0.35	2.95	3.78	2.8	2.77	2.03	0	0.09	2.46	4.76	0	2.03	1.25	0.6	1.47	1.12	2.65	0.09	4.4	2.51	1	1.61	2.33	0	4.79	1.9	1.68	0	1.27	3.27	0.92	5.29	0.09	3	0.29	1.67	1.47	1.9	3.2	1.5
581	ENSG00000155085.11	<AK9>	7.86	6.21	8.86	3.47	6.62	8.46	5.84	2.41	6.35	7.27	3.47	6.91	8.71	8.38	6.1	3.32	5.47	5.51	5.43	7.06	3.59	8.22	9.66	7.06	8.07	6.43	6.22	6.05	7.8	6.06	2.55	6.6	7.14	7.52	10.95	5.63	6.14	7.53	3.37	5.31	10.14	9.99	6.13	5.68	5.42	5.88	5.57
582	ENSG00000121057.8	<AKAP1>	51.8	56.41	45.83	53.51	47	67.42	44.13	69.13	49.98	43.43	46.42	41.54	42.64	55.61	37.88	36.81	45.5	62.1	46.09	44.54	42.89	63.6	62.41	59.78	59.93	39.33	46.75	46.86	46.16	51.14	52.64	49.84	55.01	43.49	40.8	50.74	51.95	56.44	59.23	71.23	54.62	43.64	47.08	58.62	50.54	54.68	62.62
583	ENSG00000108599.10	<AKAP10>	11.01	3.51	6.46	4.8	16.7	6.67	2.59	7.44	7.9	4.66	5.05	11.5	2.05	4.29	7.09	2.4	7.63	4.7	2.76	7.96	5.65	9.3	5.83	4.26	10.31	3.19	2.99	2.93	2.85	6.46	1.8	4.42	9.4	7.31	6.27	5.07	3.41	3.36	11.43	5.53	3.03	2.63	2.63	5.2	6.49	13.2	8.41
584	ENSG00000023516.7	<AKAP11>	0	0	0	0	0	0	0	0	0	0	0	0	0	0	0	0	0	0	0	0	0	0	0	0	0	0	0	0	0	0	0	0	0	0	0	0	0	0	0	0	0	0	0	0	0	0	0
585	ENSG00000131016.12	<AKAP12>	92.36	120.43	86.37	129.02	131.51	97.99	123.77	119.63	118.56	110.05	111.23	97.7	98.71	159.17	108.15	113.57	138.21	150.73	122.32	124.07	94.62	118.34	95.58	152.73	185.22	64.49	141.47	70.65	150	133.7	76.98	167.94	165.91	95.91	127.4	137.68	108.99	99.39	194.9	143.69	96.54	124.8	129.06	139.65	155.7	176.32	275.27
586	ENSG00000170776.15	<AKAP13>	110.24	220.93	136.25	242.11	99.52	142.14	129.97	207.3	132.17	176.52	232.8	99.96	139.81	138.32	199.13	195.06	160.84	185.72	132.49	78.82	238.64	147.57	156.63	221.16	176.85	85.47	144.6	147.78	116.42	159.17	107.62	215.44	202.74	128.62	112.98	121.15	126.49	114.22	225.99	139	125.48	108.29	136.71	134.64	239.21	178.56	235.21
587	ENSG00000186471.8	<AKAP14>	0.74	0	0.51	0.4	0.51	0	0	1.47	0.39	0	0	0	0.12	0	0.88	0	0	0	0.16	0.59	0	0.21	0.39	0	0.36	0	0	0.47	0.75	0	0.49	2.1	0.55	0	0.36	0.09	0.8	0	0	0	0	0	0	0	0.37	0.44	0.4
588	ENSG00000197976.6	<AKAP17A>	46.79	68.6	47.66	53.89	80.74	70.19	59.24	65.68	60.54	52.68	59.04	41.31	66.05	46.16	79.18	70.36	59.66	62.66	61.03	63.57	45.75	69.93	68.51	67.78	46.09	55.86	31.03	60.13	57.37	57.52	59.74	64.28	68.1	87.46	18.37	59.72	51.04	66.41	33.23	57.87	65.85	17.87	72.47	65.48	68.21	53.09	52.23
589	ENSGR0000197976.6	<AKAP17A>	0	0	0	0	0	0	0	0	0	0	0	0	0	0	0	0	0	0	0	0	0	0	0	0	0	0	0	0	0	0	0	0	0	0	0	0	0	0	0	0	0	0	0	0	0	0	0
590	ENSG00000241978.5	<AKAP2>	63.72	53.76	52.74	50.56	58.09	79.85	64.86	58.51	55.74	45.93	35.51	53.42	48	60.03	35.88	82.06	50.41	54.42	57.56	68.99	47.06	69.22	55.77	65.93	77.59	52.76	67.86	45.86	46.84	67.21	52.9	57.84	68.81	28.77	44.69	77.06	58.42	56.16	64.86	48.72	55.45	34.97	54	70.96	42.88	55.66	99.04
591	ENSG00000111254.3	<AKAP3>	2.06	0.58	0	0.8	1.57	0.88	0.97	0.28	0.93	1.94	0.71	2.84	2.12	3.14	1.52	0.81	1.59	1.58	1.42	0.93	0.4	0.41	1.47	2.23	1.33	2.24	0.53	1.44	0.83	4.35	0.36	0.87	1.9	1.02	0.76	0.38	1.33	1.12	1.18	1.54	1.31	0.65	1.62	0.61	2.59	0.74	1.06
592	ENSG00000147081.10	<AKAP4>	0.27	0.07	0.07	0.16	0	0.23	0.2	0.17	0.12	0	0.07	0	0	0	0.16	0	0	0.15	0	0	0	0	0	0	0	0	0.04	0.05	0.11	0	0	0	0.07	0	0	0	0	0.05	0	0	0.09	0	0.05	0	0	0.54	0.51
593	ENSG00000179841.8	<AKAP5>	0.48	0.68	0.35	0.56	0.39	0.56	0.31	0.48	0.79	0.47	0.65	0.67	0.86	0.86	0.81	0.48	0.54	0.46	0.56	0.48	0.51	0.67	0.71	0.65	0.54	0.29	0.39	0.53	0.56	0.78	0.54	0.35	0.8	0.86	1.43	0.31	0.73	0.54	0.33	0.72	0.49	1.29	0.45	0.46	0.53	0.59	0.6
594	ENSG00000151320.6	<AKAP6>	1.42	1.46	2.57	2.95	1.53	2.04	2.88	1.86	1.67	2.32	1.72	1.73	1.89	1.16	1.72	2.31	1.77	1.46	2.09	2.87	1.06	0.51	3.18	1.18	1.1	1.08	2.62	1.63	2.69	1.11	4.99	1.42	1.61	1.38	1.94	1.2	1.61	1.99	2.12	1.34	7.75	1.07	1.52	3.46	0.92	1.18	2.36
595	ENSG00000118507.11	<AKAP7>	19.07	14.19	9.52	11.09	13.1	10.59	15.29	15.82	12.49	12.2	10.02	17.25	6.32	9.85	12.82	8.94	12.5	13.01	12.76	16.32	12.29	16.45	12.6	10.3	10.36	10.59	8.31	12.11	15.16	11.4	8.57	13.16	15.33	8	10.54	14.81	11.93	18.73	12.63	16.29	12.76	9.83	14.48	16.51	15.9	13.48	12.74
596	ENSG00000105127.4	<AKAP8>	34.71	26.56	24.82	27.38	18.13	31.56	32.78	15.85	38.94	27.56	23.71	31.86	43.52	26.88	23.68	16.62	32.62	27.79	28.68	24.76	24.9	22.9	29.92	29.47	24.81	27.54	27.77	33.08	26.17	22.91	24.58	25.7	32.47	34.76	25.66	20.97	22.47	27.06	31.05	27.44	29.36	33.11	27.11	29.61	35.7	31.93	22.18
597	ENSG00000011243.13	<AKAP8L>	253.22	225.65	237.29	220.16	270.37	286.35	181.57	245.04	265.82	234.25	215.96	235.1	331.36	276	324.14	223.62	282.83	191.93	265.67	255.05	205.22	212.88	286.98	269.27	280.07	252.28	300.94	268.47	213.02	175.12	218.99	249.52	215.05	349.99	126.37	185.08	176.22	244.99	148.67	243.94	293.02	265.57	269.83	288.81	264.06	187.8	235.23
598	ENSG00000127914.12	<AKAP9>	65.12	67.71	75.41	64.11	108.08	73.22	61.22	57.81	90.05	66.46	61.12	61.07	77.82	88.07	87.32	39.27	62.93	59.62	86.26	88.32	64.53	91.19	97.09	66.83	90.13	62.75	67.55	73.8	74.11	64.01	43.77	73.92	78.1	71.93	79.02	63.36	77.22	79.13	51.8	59.07	91.48	63.31	86.91	68.69	88.5	67.36	66.62
599	ENSG00000166452.7	<AKIP1>	20.22	37.18	17.84	24.3	32.65	24.43	29.59	36.15	28.53	26.39	34.6	17.97	23.32	28.75	24.46	19.74	27.48	29.21	20.51	16.97	29.36	26.51	19.26	28.47	26.45	22.56	18.97	24.8	26.46	36.72	46.39	31.43	34.73	26.47	18.82	26.48	24.92	30.06	25.96	37.81	34.94	15.03	30.91	37.56	34.12	30.37	25.93
600	ENSG00000174574.11	<AKIRIN1>	48.14	57.52	26.69	46.02	58.49	42.78	45.98	69.44	38.24	45.14	53.17	44.79	41.78	39.96	71.08	63.78	43.8	54.71	39.79	44.45	45.7	46.42	60.21	49.29	54.43	42.3	37.16	40.04	41.01	55.88	51.12	54.58	51.51	51.07	54.79	43.51	66.37	34.17	48.83	71.36	40.37	30.83	50.3	59.33	54.75	60.28	60.2
601	ENSG00000135334.8	<AKIRIN2>	10.25	6.5	9.52	5.99	3.73	8.69	4.21	3.71	5.12	3.36	6.17	8.15	8.16	9.65	3.06	5.02	5.61	2.87	7.9	5.92	9.31	6.7	4.57	7.44	7.23	5.28	6.11	9.38	5.99	3.36	7.41	5.2	8.6	7.19	7.96	5.82	7.7	4.39	4.35	8.46	13.8	9.45	6.05	3.23	9.04	5.69	7
602	ENSG00000106948.12	<AKNA>	16.41	24.5	21.55	37.6	17.02	28.35	23.49	26.09	18.27	24.95	42.46	15.89	19.6	29.36	31.1	18.92	27.22	31.29	25.48	16.3	16.32	25.43	18.42	30.36	21.21	12.88	19.25	21.32	34.44	20.62	19.24	23.93	24.97	22.01	14.42	17.76	21.01	22.15	23.95	26.33	27.83	19.61	32.93	23.42	36.55	31.52	32.04
603	ENSG00000162641.14	<AKNAD1>	6.1	7.65	3.99	3.94	3.05	7.54	3.76	2.11	3.78	4.43	1.56	1.77	2.72	1.71	2.44	0.31	2.24	4.68	3.88	1.38	5.34	1.8	3.3	4.15	1.8	2.25	1.26	7.35	2.85	2.56	1.73	1.53	2.03	2.97	3.11	2.94	3.41	3.94	1.53	1.43	1.07	4.29	2.28	3.06	3.23	4.4	2.58
604	ENSG00000117448.9	<AKR1A1>	66.72	87.5	78.98	82.84	89.79	96.27	87.19	90.08	108.11	72.7	98.34	67.85	75.79	68.62	72.71	66.2	87.5	76.24	71.3	65.86	86.33	70.8	72.03	81.89	74.96	80.16	71.04	80.15	85.77	72.38	146.49	77.58	71.35	91.61	69.81	81.19	74.24	96.83	68.69	89.87	88.75	70.83	86.63	84.3	83.06	96.91	86.05
605	ENSG00000085662.9	<AKR1B1>	127.05	119.06	103.05	81.41	150.52	74.82	124.67	110.78	102.5	102.37	99.32	140.83	121.58	80.88	162.04	63.8	150.99	83.52	90.19	157.96	69.86	71.49	99.92	99.62	84	79.3	97.26	138.75	108.21	99.09	88.77	86.74	75.89	116.54	138.23	118.63	226.91	91.45	105.22	91.19	186.33	82.92	188.5	107.37	94.65	86.41	89.47
606	ENSG00000198074.5	<AKR1B10>	0	7.31	0.35	3.87	1.97	1.65	0	1.58	0.58	0.49	7.46	0.09	1	1.5	1.75	0.18	2.06	1.86	2.78	0	25.3	1.1	9.72	0.58	0.36	0	0.7	1.86	0.39	0.42	3.56	4.68	2.25	5.01	0	2.04	1.12	0	5.57	4.27	6.05	0.14	0.52	0.41	7.78	5.64	2.24
607	ENSG00000227471.4	<AKR1B15>	0.4	0.81	0.68	1.1	0.92	0.48	0.41	1.49	1.11	0.22	2.12	0.21	0.34	0.99	4	0.26	0.25	1.51	0.13	0	2.57	0.09	2.4	0.98	0	0.13	0.44	0.3	0.14	0.6	0.66	0.92	0.66	0.12	0.5	0.13	0.7	1.1	0.5	0.48	0.56	0.26	0.99	0.33	2.87	0.61	0.64
608	ENSG00000187134.8	<AKR1C1>	113.46	284.58	103.41	117.82	167.13	309.07	188.9	211.73	199.48	147.36	152.8	109.61	103	93.06	134.64	125.37	101.9	123.38	73.21	124.32	198.96	78.35	66.77	297.35	79.1	157.13	107.22	167.52	210.12	155.1	78.76	120.33	136.42	97.26	113.5	183.97	172.12	174.18	94.67	71.93	235.18	92.73	171.61	185.96	290.95	111.71	197.42
609	ENSG00000151632.12	<AKR1C2>	91.03	173.29	112.9	66.72	203.04	386.48	139.15	193.21	189.51	82.43	61.74	135.09	79.73	79.81	111.45	47.5	56.23	65.13	41.1	101.86	331.84	67.15	54.92	218.34	72.54	203.73	50.93	190.8	140.39	91.18	90.91	142.87	69.38	84.9	90.68	198.43	151.23	148.2	77.12	240.13	222.07	87.25	224.1	147.19	120.57	68.29	160.84
610	ENSG00000196139.7	<AKR1C3>	20.33	56.89	59.78	28.81	43.16	88.97	76.71	84.88	56.23	36.16	31.41	32.39	47.08	30.26	55.63	12.26	37.44	37.93	40.48	27.86	83.67	31.78	49.37	83.48	37.44	59.03	31.88	54.8	57.37	65.16	74.95	50.51	49.61	46.62	36.99	52.53	60.1	52.8	34.28	32.1	87.2	42.94	58.91	67.36	50.48	50.39	67.43
611	ENSG00000198610.6	<AKR1C4>	0	0.18	0	0	0	0	0	0	0	0	0.33	0	0	0	0.14	0	0	0	0	0	0	0	0	0	0	0	0	0	0	0	0	0	0	0	0	0	0	0.35	0	0	0	0	0	0	0.23	0.15	0
612	ENSG00000196326.6	<AKR1CL1>	0.11	0.58	0.47	0.07	0	1.15	0.36	0.07	0.81	0	0.07	0	0.36	0.64	0	0	0	0.48	0	0.09	0.2	0	0	0.07	0.07	0.49	0	0	0.07	0	0.38	0.07	0	0.09	0.45	0.58	0.07	1.57	0.24	0.07	1.86	0	1.79	0	0.48	0	0.11
613	ENSG00000122787.10	<AKR1D1>	0	0	0	0	0	0	0	0	0.04	0	0	0	0	0.07	0	0	0	0	0	0	0	0.02	0.09	0	0.09	0	0	0	0	0	0.04	0	0	0	0	0	0.03	0	0	0.07	0	0	0	0	0	0.18	0
614	ENSG00000165568.13	<AKR1E2>	12.64	13.04	13.32	12.47	5.44	8.37	9.53	10.23	9.83	11.5	27.68	15.71	9.79	10.07	9.92	10.47	14.23	14.63	14.09	9.66	14.75	14.1	18.26	12.13	9.51	10.06	15.1	8.15	15.97	16.28	9.81	8.61	12.61	14.86	9.69	7.12	7.7	13.05	14.31	17.03	12.37	3.51	10.16	9.96	21.59	9.87	19.76
615	ENSG00000053371.8	<AKR7A2>	8.38	2.65	7.28	4.89	0.76	3.89	5.03	5.82	9.2	4.21	7.35	2.47	8.69	5.41	6.03	7.64	3.73	3.23	4.52	2.16	2.29	2.79	5.69	3.01	2.43	1.63	5.13	4.75	5.35	2.31	2.96	1.57	2.66	13.49	7.37	5.94	1.52	2.4	6.71	5.29	1.47	3.77	6.06	4.38	5.69	2.77	3.43
616	ENSG00000162482.4	<AKR7A3>	0	0	0	0	0	0	0	0	0	0	0	0	0	0	0	0	0	0	0	0	0	0	0	0	0	0	0	0	0	0	0	0	0	0	0	0	0	0	0	0	0	0	0	0	0	0	0
617	ENSG00000142208.11	<AKT1>	171.11	172.91	150.89	183.19	206.37	179.18	169.23	191.1	179.82	172.94	173.11	166.08	154	159.94	157.91	206.3	156.54	182.41	145.85	187.79	163.15	162.27	153.86	154.07	174.15	173.16	171.7	149.55	166.99	164.06	217.08	176.64	157.77	192.48	162.62	174.33	151.98	152.14	143.45	174.81	173.06	176.69	153.79	207.23	163.59	160.04	178.34
618	ENSG00000204673.6	<AKT1S1>	24.63	24.2	18.43	27.61	36.65	36.65	23.67	30.68	21.86	32.8	27.85	17.85	22.53	14.57	21.66	18.39	20.68	19.55	12.89	16.07	29.8	21.93	25.1	30.76	24.42	20.73	21.67	24.17	26.6	30.1	27.3	24.07	30.65	16.35	30.13	23.3	24.55	39.57	20.47	29.05	16.75	16.82	20.28	25.15	24.04	22.42	23.95
619	ENSG00000105221.12	<AKT2>	219.34	188.27	253.95	193.07	230.45	244.49	239.85	179.76	268.21	214.07	196.32	281.82	306.84	252.81	231.5	161.83	214.45	207.88	177.58	272.63	175.32	192.01	213	197.63	215.43	195.05	211.35	260.3	256.76	194.96	194.57	207.85	182.16	275.78	272.39	240.91	267.15	226.3	170.32	194.6	295.4	286.62	283.83	199.45	243.96	190.58	224.67
620	ENSG00000117020.12	<AKT3>	49.18	47.57	38.86	66.43	42.63	61.27	37.55	64.36	37.81	50.82	36.62	52.5	49.01	59.37	39.49	42.68	58.71	76.42	52.89	45.7	33.49	50.3	56.82	67.23	67.35	43.47	58.77	41.77	43.75	56.72	23.65	45.44	83.36	41.5	61.87	35.86	55.06	38.51	66.17	50.78	43.3	52.89	47.52	75.83	53.97	60.04	76.72
621	ENSG00000166971.12	<AKTIP>	79.63	71.6	66.78	68.4	74.09	93.58	74.04	64.83	87.45	63.45	55.95	101.66	73.31	97.21	70.45	38.14	75.52	71.32	68.25	104.72	62.23	67.49	79.81	76.03	100.78	72.99	64.68	68.63	81.53	60.92	50.63	72.04	74.91	73.74	78.61	106.78	77.99	60.5	62.98	69.31	91.48	70.78	94.86	75.64	70.48	81.38	52.14
622	ENSG00000269155.1	<AL009178.1>	0	0	0	0	0	0	0	0	0	0	0	0	0	0	0	0	0	0	0	0	0	0	0	0	0	0	0	0	0	0	0	0	0	0	0	0	0	0	0	0	0	0	0	0	0	0	0
623	ENSG00000268991.1	<AL021920.2>	0	0	0	0	0	0	0	0	0	0	0	0	0	0	0	0	0	0	0	0	0	0	0	0	0	0	0	0	0	0	0	0	0	0	0	0	0	0	0	0	0	0	0	0	0	0	0
624	ENSG00000268427.1	<AL022328.1>	0	0	0	0	0	0	0	0	0	0	0	0	0	0	0	0	0	0	0	0	0	0	0	0	0	0	0	0	0	0	0	0	0	0	0	0	0	0	0	0	0	0	0	0	0	0	0
625	ENSG00000269549.1	<AL031663.2>	0	0	0	0	0	0	0	0	0	0	0	0	0	0	0	0	0	0	0	0	0	0	0	0	0	0	0	0	0	0	0	0	0	0	0	0	0	0	0	0	0	0	0	0	0	0	0
626	ENSG00000267882.1	<AL031666.2>	0	0	0	0	0	0	0	0	0	0	0	0	0	0	0	0	0	0	0	0	0	0	0	0	0	0	0	0	0	0	0	0	0	0	0	0	0	0	0	0	0	0	0	0	0	0	0
627	ENSG00000176515.1	<AL033381.1>	0	0	0	0	0	0	0	0	0	0	0	0	0	0	0	0	0	0	0	0	0	0	0	0	0	0	0	0	0	0	0	0	0	0	0	0	0	0	0	0	0	0	0	0	0	0	0
628	ENSG00000224997.1	<AL049840.1>	0	0	0	0	0	0	0	0	0	0	0	0	0	0	0	0	0	0	0	0	0	0	0	0	0	0	0	0	0	0	0	0	0	0	0	0	0	0	0	0	0	0	0	0	0	0	0
629	ENSG00000269011.1	<AL050303.1>	0	0	0	0	0	0	0	0	0	0	0	0	0	0	0	0	0	0	0	0	0	0	0	0	0	0	0	0	0	0	0	0	0	0	0	0	0	0	0	0	0	0	0	0	0	0	0
630	ENSG00000225683.1	<AL078585.1>	0	0	0	0	0	0	0	0	0	0	0	0	0	0	0	0	0	0	0	0	0	0	0	0	0	0	0	0	0	0	0	0	0	0	0	0	0	0	0	0	0	0	0	0	0	0	0
631	ENSG00000203863.1	<AL079342.1>	0	0	0	0	0	0	0	0	0	0	0	0	0	0	0	0	0	0	0	0	0	0	0	0	0	0	0	0	0	0	0	0	0	0	0	0	0	0	0	0	0	0	0	0	0	0	0
632	ENSG00000269709.1	<AL109659.1>	0	0	0	0	0	0	0	0	0	0	0	0	0	0	0	0	0	0	0	0	0	0	0	0	0	0	0	0	0	0	0	0	0	0	0	0	0	0	0	0	0	0	0	0	0	0	0
633	ENSG00000268552.1	<AL109927.1>	0	0	0	0	0	0	0	0	0	0	0	0	0	0	0	0	0	0	0	0	0	0	0	0	0	0	0	0	0	0	0	0	0	0	0	0	0	0	0	0	0	0	0	0	0	0	0
634	ENSG00000269375.1	<AL117190.3>	0	0	0	0	0	0	0	0	0	0	0	0	0	0	0	0	0	0	0	0	0	0	0	0	0	0	0	0	0	0	0	0	0	0	0	0	0	0	0	0	0	0	0	0	0	0	0
635	ENSG00000267848.1	<AL118506.1>	0	0	0	0	0	0	0	0	0	0	0	0	0	0	0	0	0	0	0	0	0	0	0	0	0	0	0	0	0	0	0	0	0	0	0	0	0	0	0	0	0	0	0	0	0	0	0
636	ENSG00000268628.1	<AL121761.2>	0	0	0	0	0	0	0	0	0	0	0	0	0	0	0	0	0	0	0	0	0	0	0	0	0	0	0	0	0	0	0	0	0	0	0	0	0	0	0	0	0	0	0	0	0	0	0
637	ENSG00000269120.1	<AL133318.1>	0	0	0	0	0	0	0	0	0	0	0	0	0	0	0	0	0	0	0	0	0	0	0	0	0	0	0	0	0	0	0	0	0	0	0	0	0	0	0	0	0	0	0	0	0	0	0
638	ENSG00000235705.4	<AL133481.1>	0	0	0	0	0	0	0	0	0	0	0	0	0	0	0	0	0	0	0	0	0	0	0	0	0	0	0	0	0	0	0	0	0	0	0	0	0	0	0	0	0	0	0	0	0	0	0
639	ENSG00000212673.1	<AL136115.1>	0	0	0	0	0	0	0	0	0	0	0	0	0	0	0	0	0	0	0	0	0	0	0	0	0	0	0	0	0	0	0	0	0	0	0	0	0	0	0	0	0	0	0	0	0	0	0
640	ENSG00000215462.1	<AL136218.1>	0	0	0	0	0	0	0	0	0	0	0	0	0	0	0	0	0	0	0	0	0	0	0	0	0	0	0	0	0	0	0	0	0	0	0	0	0	0	0	0	0	0	0	0	0	0	0
641	ENSG00000203630.3	<AL136531.1>	0	0	0	0	0	0	0	0	0	0	0	0	0	0	0	0	0	0	0	0	0	0	0	0	0	0	0	0	0	0	0	0	0	0	0	0	0	0	0	0	0	0	0	0	0	0	0
642	ENSG00000237847.2	<AL137798.1>	0	0	0	0	0	0	0	0	0	0	0	0	0	0	0	0	0	0	0	0	0	0	0	0	0	0	0	0	0	0	0	0	0	0	0	0	0	0	0	0	0	0	0	0	0	0	0
643	ENSG00000268344.1	<AL138815.2>	0	0	0	0	0	0	0	0	0	0	0	0	0	0	0	0	0	0	0	0	0	0	0	0	0	0	0	0	0	0	0	0	0	0	0	0	0	0	0	0	0	0	0	0	0	0	0
644	ENSG00000269624.1	<AL138847.1>	0	0	0	0	0	0	0	0	0	0	0	0	0	0	0	0	0	0	0	0	0	0	0	0	0	0	0	0	0	0	0	0	0	0	0	0	0	0	0	0	0	0	0	0	0	0	0
645	ENSG00000253459.3	<AL139099.1>	0	0	0	0	0	0	0	0	0	0	0	0	0	0	0	0	0	0	0	0	0	0	0	0	0	0	0	0	0	0	0	0	0	0	0	0	0	0	0	0	0	0	0	0	0	0	0
646	ENSG00000248458.2	<AL139147.1>	0	0	0	0	0	0	0	0	0	0	0	0	0	0	0	0	0	0	0	0	0	0	0	0	0	0	0	0	0	0	0	0	0	0	0	0	0	0	0	0	0	0	0	0	0	0	0
647	ENSG00000269223.1	<AL158091.1>	0	0	0	0	0	0	0	0	0	0	0	0	0	0	0	0	0	0	0	0	0	0	0	0	0	0	0	0	0	0	0	0	0	0	0	0	0	0	0	0	0	0	0	0	0	0	0
648	ENSG00000269305.1	<AL158147.2>	0	0	0	0	0	0	0	0	0	0	0	0	0	0	0	0	0	0	0	0	0	0	0	0	0	0	0	0	0	0	0	0	0	0	0	0	0	0	0	0	0	0	0	0	0	0	0
649	ENSG00000234631.1	<AL162407.1>	0	0	0	0	0	0	0	0	0	0	0	0	0	0	0	0	0	0	0	0	0	0	0	0	0	0	0	0	0	0	0	0	0	0	0	0	0	0	0	0	0	0	0	0	0	0	0
650	ENSG00000228537.1	<AL353608.1>	0	0	0	0	0	0	0	0	0	0	0	0	0	0	0	0	0	0	0	0	0	0	0	0	0	0	0	0	0	0	0	0	0	0	0	0	0	0	0	0	0	0	0	0	0	0	0
651	ENSG00000233889.1	<AL353698.1>	0	0	0	0	0	0	0	0	0	0	0	0	0	0	0	0	0	0	0	0	0	0	0	0	0	0	0	0	0	0	0	0	0	0	0	0	0	0	0	0	0	0	0	0	0	0	0
652	ENSG00000268578.1	<AL354718.1>	0	0	0	0	0	0	0	0	0	0	0	0	0	0	0	0	0	0	0	0	0	0	0	0	0	0	0	0	0	0	0	0	0	0	0	0	0	0	0	0	0	0	0	0	0	0	0
653	ENSG00000268674.1	<AL355149.2>	0	0	0	0	0	0	0	0	0	0	0	0	0	0	0	0	0	0	0	0	0	0	0	0	0	0	0	0	0	0	0	0	0	0	0	0	0	0	0	0	0	0	0	0	0	0	0
654	ENSG00000177596.1	<AL355390.1>	0	0	0	0	0	0	0	0	0	0	0	0	0	0	0	0	0	0	0	0	0	0	0	0	0	0	0	0	0	0	0	0	0	0	0	0	0	0	0	0	0	0	0	0	0	0	0
655	ENSG00000224474.2	<AL355490.1>	0	0	0	0	0	0	0	0	0	0	0	0	0	0	0	0	0	0	0	0	0	0	0	0	0	0	0	0	0	0	0	0	0	0	0	0	0	0	0	0	0	0	0	0	0	0	0
656	ENSG00000268421.1	<AL355531.2>	0	0	0	0	0	0	0	0	0	0	0	0	0	0	0	0	0	0	0	0	0	0	0	0	0	0	0	0	0	0	0	0	0	0	0	0	0	0	0	0	0	0	0	0	0	0	0
657	ENSG00000225996.2	<AL356356.1>	0	0	0	0	0	0	0	0	0	0	0	0	0	0	0	0	0	0	0	0	0	0	0	0	0	0	0	0	0	0	0	0	0	0	0	0	0	0	0	0	0	0	0	0	0	0	0
658	ENSG00000248835.2	<AL357673.1>	0	0	0	0	0	0	0	0	0	0	0	0	0	0	0	0	0	0	0	0	0	0	0	0	0	0	0	0	0	0	0	0	0	0	0	0	0	0	0	0	0	0	0	0	0	0	0
659	ENSG00000269295.1	<AL358113.1>	0	0	0	0	0	0	0	0	0	0	0	0	0	0	0	0	0	0	0	0	0	0	0	0	0	0	0	0	0	0	0	0	0	0	0	0	0	0	0	0	0	0	0	0	0	0	0
660	ENSG00000268211.1	<AL359091.2>	0	0	0	0	0	0	0	0	0	0	0	0	0	0	0	0	0	0	0	0	0	0	0	0	0	0	0	0	0	0	0	0	0	0	0	0	0	0	0	0	0	0	0	0	0	0	0
661	ENSG00000204038.3	<AL359195.1>	0	0	0	0	0	0	0	0	0	0	0	0	0	0	0	0	0	0	0	0	0	0	0	0	0	0	0	0	0	0	0	0	0	0	0	0	0	0	0	0	0	0	0	0	0	0	0
662	ENSG00000205850.6	<AL359736.1>	0	0	0	0	0	0	0	0	0	0	0	0	0	0	0	0	0	0	0	0	0	0	0	0	0	0	0	0	0	0	0	0	0	0	0	0	0	0	0	0	0	0	0	0	0	0	0
663	ENSG00000205740.1	<AL359878.1>	0	0	0	0	0	0	0	0	0	0	0	0	0	0	0	0	0	0	0	0	0	0	0	0	0	0	0	0	0	0	0	0	0	0	0	0	0	0	0	0	0	0	0	0	0	0	0
664	ENSG00000196979.1	<AL360004.1>	0	0	0	0	0	0	0	0	0	0	0	0	0	0	0	0	0	0	0	0	0	0	0	0	0	0	0	0	0	0	0	0	0	0	0	0	0	0	0	0	0	0	0	0	0	0	0
665	ENSG00000204049.1	<AL391421.1>	0	0	0	0	0	0	0	0	0	0	0	0	0	0	0	0	0	0	0	0	0	0	0	0	0	0	0	0	0	0	0	0	0	0	0	0	0	0	0	0	0	0	0	0	0	0	0
666	ENSG00000226974.2	<AL445989.1>	0	0	0	0	0	0	0	0	0	0	0	0	0	0	0	0	0	0	0	0	0	0	0	0	0	0	0	0	0	0	0	0	0	0	0	0	0	0	0	0	0	0	0	0	0	0	0
667	ENSG00000189275.3	<AL450307.1>	0	0	0	0	0	0	0	0	0	0	0	0	0	0	0	0	0	0	0	0	0	0	0	0	0	0	0	0	0	0	0	0	0	0	0	0	0	0	0	0	0	0	0	0	0	0	0
668	ENSG00000240510.2	<AL589765.1>	0	0	0	0	0	0	0	0	0	0	0	0	0	0	0	0	0	0	0	0	0	0	0	0	0	0	0	0	0	0	0	0	0	0	0	0	0	0	0	0	0	0	0	0	0	0	0
669	ENSG00000268172.1	<AL590452.1>	0	0	0	0	0	0	0	0	0	0	0	0	0	0	0	0	0	0	0	0	0	0	0	0	0	0	0	0	0	0	0	0	0	0	0	0	0	0	0	0	0	0	0	0	0	0	0
670	ENSG00000268146.1	<AL590483.1>	0	0	0	0	0	0	0	0	0	0	0	0	0	0	0	0	0	0	0	0	0	0	0	0	0	0	0	0	0	0	0	0	0	0	0	0	0	0	0	0	0	0	0	0	0	0	0
671	ENSG00000269620.1	<AL590560.1>	0	0	0	0	0	0	0	0	0	0	0	0	0	0	0	0	0	0	0	0	0	0	0	0	0	0	0	0	0	0	0	0	0	0	0	0	0	0	0	0	0	0	0	0	0	0	0
672	ENSG00000232850.1	<AL590708.2>	0	0	0	0	0	0	0	0	0	0	0	0	0	0	0	0	0	0	0	0	0	0	0	0	0	0	0	0	0	0	0	0	0	0	0	0	0	0	0	0	0	0	0	0	0	0	0
673	ENSG00000268387.1	<AL590714.1>	0	0	0	0	0	0	0	0	0	0	0	0	0	0	0	0	0	0	0	0	0	0	0	0	0	0	0	0	0	0	0	0	0	0	0	0	0	0	0	0	0	0	0	0	0	0	0
674	ENSG00000269554.1	<AL590822.2>	0	0	0	0	0	0	0	0	0	0	0	0	0	0	0	0	0	0	0	0	0	0	0	0	0	0	0	0	0	0	0	0	0	0	0	0	0	0	0	0	0	0	0	0	0	0	0
675	ENSG00000213121.2	<AL590867.1>	0	0	0	0	0	0	0	0	0	0	0	0	0	0	0	0	0	0	0	0	0	0	0	0	0	0	0	0	0	0	0	0	0	0	0	0	0	0	0	0	0	0	0	0	0	0	0
676	ENSG00000269337.1	<AL591479.1>	0	0	0	0	0	0	0	0	0	0	0	0	0	0	0	0	0	0	0	0	0	0	0	0	0	0	0	0	0	0	0	0	0	0	0	0	0	0	0	0	0	0	0	0	0	0	0
677	ENSG00000267884.1	<AL626787.1>	0	0	0	0	0	0	0	0	0	0	0	0	0	0	0	0	0	0	0	0	0	0	0	0	0	0	0	0	0	0	0	0	0	0	0	0	0	0	0	0	0	0	0	0	0	0	0
678	ENSG00000237683.5	<AL627309.1>	0	0	0	0	0	0	0	0	0	0	0	0	0	0	0	0	0	0	0	0	0	0	0	0	0	0	0	0	0	0	0	0	0	0	0	0	0	0	0	0	0	0	0	0	0	0	0
679	ENSG00000215014.3	<AL645728.1>	0	0	0	0	0	0	0	0	0	0	0	0	0	0	0	0	0	0	0	0	0	0	0	0	0	0	0	0	0	0	0	0	0	0	0	0	0	0	0	0	0	0	0	0	0	0	0
680	ENSG00000268996.1	<AL807752.1>	0	0	0	0	0	0	0	0	0	0	0	0	0	0	0	0	0	0	0	0	0	0	0	0	0	0	0	0	0	0	0	0	0	0	0	0	0	0	0	0	0	0	0	0	0	0	0
681	ENSG00000148218.11	<ALAD>	353.09	117.17	153.7	144.51	191.62	166.26	189.46	115.48	167.61	176.72	108.07	278.53	189.25	181.86	186.52	150.74	157.44	163.68	183.71	205.18	78.08	120.67	192	131.67	183.65	153.96	162.56	189.39	142.99	208.6	63.48	152.86	148.63	178.85	205.91	191.76	134.22	162.47	152.74	174.33	169.91	228.29	174.56	129.45	157.76	148.3	107.07
682	ENSG00000023330.10	<ALAS1>	37.96	31.8	23.61	41.94	29.15	40.07	38.4	38.27	35.18	36.32	34.67	30.39	23.51	29.7	24.35	44.16	32.65	40.17	28.04	23.5	31.03	24.46	27.15	24.5	30.09	40.15	26.98	20.55	22.93	26.71	32.16	33.38	29	30.29	33.67	38.35	27.26	17.74	32.95	33.77	31.95	18.4	29.76	40.77	33.82	35.77	29.18
683	ENSG00000158578.14	<ALAS2>	0	0.07	0.28	0	0.14	0.16	1.22	0	0.23	0	0	0.09	0.15	0	0.12	2.09	0.4	0.22	0.56	0.52	0.27	0.34	0.53	0.18	1.21	0.33	0.53	0.26	0.45	0.6	0.13	0.29	0	0	0.34	0.13	0.16	0.05	0.5	0	0.94	0.57	0.35	0.24	0	0	0.04
684	ENSG00000163631.12	<ALB>	4.17	32.89	6.98	6.41	7.5	4.37	2.52	1.84	4.98	1.84	3.38	4.21	1.12	7.41	7.39	3.19	2.4	6.82	7.32	10.16	1.64	11.8	6.2	1.72	34.61	1.91	2.25	2.61	7.84	4.49	0.62	4.31	2.12	10.35	2.8	2.54	5.86	9.27	3.65	5.29	10.55	4.22	9.57	3.7	4.63	8.93	2.82
685	ENSG00000170017.8	<ALCAM>	11.26	11.95	10.12	12.12	23.85	7.69	13.38	17.58	18.55	8.67	10.51	14.44	17.74	17.12	17.47	10.14	15.39	17.03	18.12	31.72	11.42	15.58	11.48	10.9	10.81	22.08	15.77	13.18	19.86	18.91	9.98	17.05	21.96	19.44	20.76	16.96	18.55	17.2	8.24	13.53	18.52	22.92	24.9	28.87	20.28	12.96	7.55
686	ENSG00000161618.5	<ALDH16A1>	42.59	18.02	23.12	13.41	15.65	28.71	14.53	22.82	22.32	25.76	22.49	18.45	13.65	27.93	32.87	20.4	23.83	16.35	11.73	19.69	20.4	12.59	12.92	23.12	22.22	19.98	27.84	21.12	27.11	20.89	55.36	20.42	6.35	32.38	26.9	18.37	23.41	29.41	15.29	17.35	29.57	16.7	24.69	20.19	32.4	22.55	22.47
687	ENSG00000059573.4	<ALDH18A1>	23.74	21.41	28.06	11.85	17.51	22.88	22.8	17.31	31.2	22.4	22.93	27.12	16.21	16.62	21.08	37.18	17.59	20.36	15.43	23.81	17.5	15.56	14.57	13.02	15.17	24.69	15.89	26	20.22	17.02	38.99	21.12	18.96	15.97	17.53	32.39	24.22	18.77	14.96	22.39	26.12	24.79	31.61	20.19	17.85	16.62	17.06
688	ENSG00000165092.8	<ALDH1A1>	21.2	2.72	7.47	11.4	18.18	17.1	25.02	10.05	24.41	14.41	4.48	20.53	6.23	27.7	9.87	5.15	10.84	20.51	11.18	7.08	2.09	25.82	7.25	3.94	15.01	9.47	3.74	9.31	11.37	14.18	1.61	14.05	19.49	6.2	10.98	24.9	13.39	6.66	13.15	13.41	5.88	4.29	9.46	4.4	6.26	12.39	7.75
689	ENSG00000128918.10	<ALDH1A2>	8.96	5.46	4.17	6.62	5.93	9.59	6.34	11.7	9.27	6.57	4.47	2.88	5.21	3.19	7.23	2.99	3.41	5.77	2.65	8.32	6.36	11.2	16.77	9.92	9.19	2.91	12.26	7.52	6.35	5.18	8.72	15.52	15.97	6.67	10.48	10.54	6.95	6.13	8.98	4.79	10.62	8.47	10.51	6.93	2.73	11.54	9.57
690	ENSG00000184254.12	<ALDH1A3>	22.46	21.52	22.13	21.33	29.41	22.56	33.93	15.03	26.75	15.6	8.35	55.93	27.31	16.26	28.13	47.57	19.34	13.08	21.65	28.2	17.23	17.77	9.74	12.26	20.07	26.06	22.16	23.82	33.64	23.29	65.63	26.84	15.7	21.51	17.03	43.67	36.48	20.67	13.37	16.59	29.82	17.39	41.87	24.46	12.89	24.38	16.27
691	ENSG00000137124.6	<ALDH1B1>	0	0	0	0	0	0	0	0	0	0	0	0	0	0	0	0	0	0	0	0	0	0	0	0	0	0	0	0	0	0	0	0	0	0	0	0	0	0	0	0	0	0	0	0	0	0	0
692	ENSG00000144908.9	<ALDH1L1>	13.72	47.82	12.24	160.94	5.91	16.43	6.79	63.25	10.61	22.72	38.81	4.38	25.33	111.48	19.34	16.17	73.48	83.09	95.1	3.86	48.48	32.82	30.98	55.93	37.91	41.38	45.72	7.56	2.69	50.81	4.5	33.18	78.92	30.38	20.69	3.98	12.2	7.63	117.39	34.01	6.25	15.13	5.37	41.57	29.81	69.64	58.68
693	ENSG00000136010.9	<ALDH1L2>	4.92	5.98	5.43	3.76	5.33	6.15	5.1	2.35	6.91	4.86	6.19	3.57	3.3	5.32	7.39	2.25	3.7	2.34	3.12	3.37	4.41	8.52	3.23	4.79	5.89	2.6	2.51	4.52	4.2	4.18	8.21	2.67	2.66	6.48	6.62	2.2	6.58	3.76	3.78	5.62	7.17	5.03	6.99	4.9	3.05	3.48	2.47
694	ENSG00000111275.8	<ALDH2>	6.46	5.31	6.2	10.22	5.02	14.26	5.03	10.2	10.15	11.62	9.28	2.74	11.15	6.48	6.28	5.04	10.21	10.58	8.04	4.29	8.32	8.21	8.94	13.58	7.6	4.64	9.69	6.54	6.48	9.35	4.39	4.31	10.35	5.6	11.89	8.03	5.44	5.99	11.03	6.98	6.83	4.29	8.73	9.14	10.44	9.24	8.8
695	ENSG00000108602.13	<ALDH3A1>	2.41	1.8	3.45	1.86	6.21	5.13	4.81	1.54	5.07	2.37	2.65	2.97	2.65	2.51	3.89	2.71	2.83	2.78	3.54	2.82	1.38	6.47	13.48	1.18	2.4	1.3	1.6	2.75	3.86	1.8	1.46	3.72	3.78	3.65	4.38	2.78	1.35	2.27	2.38	2.65	6.78	2.84	4.22	1.75	2.07	2.46	2.13
696	ENSG00000072210.14	<ALDH3A2>	137.93	85.11	101.49	64.8	78.52	124.49	111.99	70.11	133.21	79.41	76.77	136.48	86.63	124.56	77.24	38.01	83.31	80.51	98.54	100.79	93.87	71.29	86.59	97.63	100.85	99.37	78.54	115.98	84.64	89.87	55.56	90.27	81.4	110.79	97.86	109.74	120.02	85.21	71.24	99.11	115.42	109.52	104.86	90.15	84.55	74.67	75.34
697	ENSG00000006534.11	<ALDH3B1>	120.35	61.5	78.77	89.62	87.82	50.45	66.44	77.95	55.74	103.61	103.46	74.18	68.78	117.52	92.32	61.25	121.15	118.44	121.05	69.25	60.56	71.8	72.93	88.11	94.17	87.25	64.72	78.66	61.67	133.91	37.49	88.97	74.94	117.91	50.79	57.36	54.3	105.49	96.33	136.63	51.87	57.5	72.07	81.18	122.43	104.91	64.69
698	ENSG00000132746.10	<ALDH3B2>	0.72	0.13	0.23	0.29	0	0.07	0	0.59	0	0.7	0	0.28	0.03	0.37	0.09	0	0.16	0	0.45	0.14	0.58	0.05	0.23	0.44	0.18	0.13	0	1.33	0	0.4	0.09	0.29	0.53	0	0.33	0.25	0.23	0.02	0.52	0.26	0	0.14	0	0.2	0.07	0.15	0.11
699	ENSG00000159423.12	<ALDH4A1>	32.53	40.87	27.66	45.54	15.17	27.79	24.75	28.51	25.24	31.93	80.77	21.59	22.42	33.14	42.05	21.45	49.76	59.45	39.17	29.64	41.58	24.07	59.3	37.87	40.49	34.18	30.81	25.58	24.25	45.48	23.29	35.34	34.75	50.38	24.51	23.08	27.79	23.38	58.57	76.31	24.15	18.34	23.54	39.34	40.18	48.21	40.32
700	ENSG00000112294.8	<ALDH5A1>	29.34	11	13.48	10.19	22.6	13.48	19.96	6.69	17.46	15.8	8.64	35.89	14.9	15.93	19.61	13.9	16.92	15.83	19.3	20.09	9.54	16.04	22.55	11.19	19.87	21.11	13.89	19.84	14.62	20.62	3.34	12.41	13.14	16.31	20.95	17.65	20.33	12.51	15.91	18.48	17.18	13.19	16.73	12.09	11.81	16.97	10.08
701	ENSG00000119711.8	<ALDH6A1>	62.07	48.68	38.25	64.02	35.06	25.14	37.34	35.24	35.81	48.97	55.51	57.66	51.8	79.35	37.56	38.29	60.8	73.46	75.64	38.74	56.75	62.38	58.1	63.93	66.54	45.65	44.05	28.96	35.11	75.05	8.36	54.71	73.7	57.28	55.77	31.66	40.24	33.37	87.48	81.21	26.64	49.46	33.54	59.76	63.46	65.41	54.83
702	ENSG00000164904.11	<ALDH7A1>	101.63	81.16	117.84	133.99	79.33	79.15	113.63	55.13	111.19	113.93	104	141.41	93.07	166.91	82.17	78.81	157.91	138.36	129.29	102.42	104.25	121.85	120.9	122.66	148.96	104.88	80.37	111.68	101.26	133.5	43	99.24	115.97	145.27	82.41	123.9	84.32	100.89	135.45	143.69	91.79	81	80.52	121.09	136.04	137.06	98.97
703	ENSG00000118514.9	<ALDH8A1>	1.9	1.24	1.84	1.19	2.29	1.52	0.65	2.37	1.06	1.6	3.59	3.55	2.01	0	5.59	0.76	3.79	4.11	0.93	0.55	0.27	1.77	1.33	0	3.23	0	3.78	1.88	1.04	1.53	0.49	1.36	0.77	7.72	3.44	2.73	4.62	2	2.43	1.19	5.79	2.62	0.33	1.19	0	3.05	3.3
704	ENSG00000143149.8	<ALDH9A1>	7.83	10.69	15.86	13.21	12.36	11.95	22.41	14.29	18.2	14.59	5.56	28.15	24.76	19.89	18.39	7.51	24.32	10.93	8.6	9.41	5.9	14.7	17.48	18.61	8.45	13.12	19.9	13.55	9.92	9.6	22	4.02	12.32	22.67	8.87	10.51	15.82	17.6	2.93	6.9	10.96	13.05	18.12	5.13	6.65	7.28	13.97
705	ENSG00000149925.12	<ALDOA>	1568.75	1866.79	1668.28	2145.3	1405.4	1801.59	1871.45	1868.93	1379.25	1447.81	2298.84	1343.42	1294.29	1645.99	1565.88	1923.48	1594.58	2135.29	1948.66	1476.84	2010.74	1700.92	1253.64	1566.62	1773.86	1538.11	1319.64	1556.89	1554.13	1659.32	2168.74	1527.71	1553.81	1380.35	1049.6	1846.74	1263.38	1545.17	1756.5	2087.63	1788.14	965.63	1461.51	1826.44	1795.89	1859.44	1737.25
706	ENSG00000136872.13	<ALDOB>	0	0	0	0	0	0.95	0	0.44	0	0	0	0	0	0	0	0	0	0	0	0	0	0	0	0	0	0	0	0	0	0	0	0	0	0	0	0	0	0	0	0	0	0	0	0	0	0	0
707	ENSG00000109107.9	<ALDOC>	763.95	335.49	226.17	482.17	205.44	193.47	247.72	130.68	134.86	548.96	439.49	192.59	194.74	263.82	484.14	295.33	469.14	681.92	635.88	228.65	195.93	287.96	455.69	315.21	425.1	298.42	366.29	177.33	177.07	585.99	42.85	388.14	414.6	445.31	188.18	227.17	195.2	257.02	581.05	436.95	131.48	87.87	177.59	325.17	505.07	635.97	188.24
708	ENSG00000033011.7	<ALG1>	5.17	6.61	5.83	3.15	9.47	5.3	10.91	3.34	4.63	8.46	4.99	6.18	5.06	10.73	5.13	2.97	4.8	3.63	3.49	9.98	4.01	5.32	8.94	4.04	5.5	6.16	7.94	7.98	4.86	11.67	4.41	6.69	5.17	6.17	6.24	6.98	5.02	8.64	5.77	6.72	5.66	3.03	3.89	6.43	4.18	5.88	2.36
709	ENSG00000139133.2	<ALG10>	3.81	2.3	2.8	2.8	4.58	2.26	0.99	1.87	3.68	3.29	1.74	5.23	4.99	3.27	2.21	3.78	2.81	2.01	2.07	2.96	1.33	4.01	4.9	1.36	3.17	1.39	2.42	1.02	0.63	3.18	2.27	1.9	3.92	4.22	2.49	1.93	0.26	2.21	1.55	2.91	4.33	2.27	3.36	0.67	1.9	3.22	3.74
710	ENSG00000175548.4	<ALG10B>	0.43	2.36	3.31	0.2	1.87	0.39	1.44	1.4	2.73	0.97	0.49	1.24	1.05	1.78	1.26	0.74	1.62	1.9	3.87	0.61	0.46	3.82	2.97	1.81	1.57	0.09	0.14	1.58	0.68	1.96	0.64	0.13	0.22	0.73	2.03	2.16	1.5	1.41	1.71	1.28	2.33	1.67	0.42	1.11	2.29	1.46	2.27
711	ENSG00000253710.1	<ALG11>	6.64	5.42	5.93	6.28	8.17	6.45	5.51	5.82	6.03	5.49	5.88	9.28	5.71	7.45	5.25	5.65	5.52	6.76	5.99	4.46	4.48	9.41	6.31	5.82	6.83	4.58	4.2	8.69	5.78	8.78	5.51	6.27	6.72	3.06	5.69	7.36	6.18	6.2	6.71	8.07	4.94	2.93	6.24	7.6	4.22	7.17	5.5
712	ENSG00000182858.9	<ALG12>	12.12	19.75	13.74	18.24	15.56	22.04	16.66	19.11	17.55	18.04	16.9	11.96	24.83	26.49	13.19	14.9	17.32	17.54	15.19	19.59	17.28	12.29	20.13	12.12	13.23	19.39	11.66	18.56	15.23	13.73	17.51	17.42	10.7	14.89	10.62	14.89	6.91	16.94	12.5	19.15	14.93	16.58	11.85	22.94	14.73	12.72	11.47
713	ENSG00000101901.6	<ALG13>	65.97	74.43	62.96	49.49	71.34	72.76	65.83	70.47	81.66	71.49	60.67	82.89	88.85	64.24	83.14	59.93	83.53	58.77	80.96	100.76	79.85	65.35	81.67	90.16	73.07	67.83	70.41	78.43	73.53	69.56	74.84	61.2	79.54	81.26	92.05	74.61	77.09	70.95	49.29	73.27	82.12	89.51	113.61	78.33	77.02	63.28	88.43
714	ENSG00000172339.9	<ALG14>	7.52	2.9	3.62	3.08	4.79	19.03	5.33	3.27	3.85	1.24	13.45	4.61	1.55	7.01	2.53	4.12	4.65	5.27	3.23	0	7.05	7.68	18.18	2.19	1.23	2.46	0	2.72	3.14	2	5.34	2.38	14.44	5.15	21.72	3.2	13.88	5.23	5.26	6.83	17.5	0.55	0.92	4.89	2.61	3.77	4.93
715	ENSG00000189366.5	<ALG1L>	0	0	0	0	0	0	0	0	0	0	0	0	0	0	0	0	0	0	0	0	0	0	0	0	0	0	0	0	0	0	0	0	0	0	0	0	0	0	0	0	0	0	0	0	0	0	0
716	ENSG00000119523.8	<ALG2>	26.82	25.8	19.46	22.51	29.17	25.37	18.97	23.57	27.05	25.38	22.11	28.02	25.31	23.26	22.56	25.92	21.81	26.76	24.54	22.03	27.08	24.16	25.97	23.12	22.63	24.5	34.76	27.71	19.54	20.57	35.01	26.75	24.04	25.61	49.46	19.7	28.4	16.05	20.21	22.78	23.89	40.3	23.45	23.15	22.88	21.7	27.01
717	ENSG00000214160.5	<ALG3>	24.63	35.95	24.33	22.96	25.36	25.63	17.96	34.56	28.56	27.63	51.56	29.56	20.81	30.42	28.59	46.8	33.45	38.33	22.07	27.58	30.85	23.52	30.29	23.92	26	24.74	29.1	22.67	26.39	27.91	58.71	30.32	31.34	28.09	28.08	24.06	23.87	24.95	27.77	35.46	24.34	32.99	27.46	42.84	41.34	20.37	26.17
718	ENSG00000120697.4	<ALG5>	17.95	15.38	7.26	9.9	10.7	10.73	7.15	13.91	12.15	14.36	16.08	13.69	16.14	9.32	16.83	12.98	14.47	11.33	15.79	22.89	16.46	11.14	17.23	7.06	18.56	12.74	14.95	11.6	13.63	12.87	17.21	15.98	10.29	22.65	22.1	10.83	14.21	11.78	11.32	12.37	15.59	20.78	15.75	14.01	15.7	12.22	11.93
719	ENSG00000088035.11	<ALG6>	15.14	18.9	18.34	11.51	18.29	17.44	12.21	10.91	23.9	15.78	10.38	29.54	29.91	22.75	14.96	11.8	12.68	14.85	27.7	28.84	11.67	16.41	20.48	16.41	19.08	25.16	31.23	19.56	19.52	16	13.69	15.32	15.17	25.62	27.34	15.43	25.09	22.15	6.6	17.63	36.74	37.89	23.19	19.62	27.95	13.99	17.17
720	ENSG00000159063.8	<ALG8>	43.36	40.6	46.61	29.4	42.81	42.63	46.14	40.05	41.42	36.29	49.54	38.91	25.42	36.44	37.24	37.46	40.16	27.07	39.08	66.2	51.71	33.05	47.22	24.41	36.49	66.14	41.83	41.34	42.66	40.04	81.7	39.91	53.61	53.87	35.56	38.91	39.61	35.88	35.89	41.63	56.07	33.09	47.93	36.22	49.81	45.38	35.92
721	ENSG00000086848.10	<ALG9>	45.59	56.34	52.72	36.8	63.84	48.89	41.44	44.7	52.5	50.41	49.65	59.53	59.66	49.63	57.15	35.76	47.97	39.14	55.05	56.37	45.55	56.82	54.4	45.52	50.47	61.48	40.97	66.46	54.62	41.77	54.01	44.9	42.49	50.82	45.61	54.49	44.5	59.42	41.29	54.18	59.59	53.61	59.19	56.71	45.11	47.16	48.77
722	ENSG00000171094.11	<ALK>	0	0	0.26	0.27	0.46	0.32	0	0.04	0.55	0	0	0	0	0	0.12	0	0.43	0.26	0	0	0	0	0	0.05	0.25	0.11	0	0.26	0.3	0.15	1.35	0.59	0	0.19	0.55	0	0.7	0	0	0.13	0.24	0.33	0.24	0	0	0	0.88
723	ENSG00000100601.5	<ALKBH1>	15.23	18.54	14.3	16.05	25.88	17.71	19.36	17.32	19.66	14.97	15.19	18.77	16	16.86	19.31	13.22	18.55	19.98	19.33	15.92	20.31	21.54	20.11	13.82	17.84	14.95	15.1	17.81	16	18.66	13.56	18.34	16.5	15.97	12.84	14.16	13.42	17.18	18.77	17.72	12	15.43	22.83	22.5	13.65	21.7	15.63
724	ENSG00000189046.6	<ALKBH2>	33.31	46	32.56	48.89	57.03	44.59	30.2	49.9	43.27	33.03	68.86	30.53	30.61	38.93	53.08	66.29	38.52	45.17	55.14	42.51	47.66	69.1	42.71	34.26	40.9	37.72	29	32.17	28.97	44.97	101.11	47.61	37.49	40.05	24.94	36.64	38.25	57.19	32.99	48.87	25.53	32.59	34.15	52.68	38.48	50.49	43.27
725	ENSG00000166199.8	<ALKBH3>	41.01	36.24	47.07	35.86	51.57	36.56	38.18	38.54	34.05	91.63	48.23	44.1	38.93	48.9	42.85	31.07	38.57	42.53	41.73	51.22	45.95	42.15	38.41	33.75	35.33	50.45	34.99	43.18	34.21	27.8	35.37	45.75	32.4	46.74	35.52	29.93	29.5	55.78	33.16	45.08	40.41	43.28	29.69	40.53	38.46	44.09	31.74
726	ENSG00000160993.3	<ALKBH4>	11.26	6.52	5.22	6.62	11.2	10.81	7.04	13.63	12.35	8.01	7.37	6.66	8.52	7.45	10.43	4.74	9.87	7.02	9.37	10.16	7.9	13.97	5.85	6.96	8.83	10.35	5.3	10.47	8.22	8.51	7.24	6.67	12.74	6.1	5.88	9.12	8.33	6.85	7.69	10.61	7.72	5.01	11.55	9.27	10.44	12.77	5.97
727	ENSG00000091542.8	<ALKBH5>	16.86	36.66	28.23	13.15	12.6	27.76	29.92	28.22	24.97	27.62	25.72	19.35	26.28	21.3	23.38	19.07	15.44	23.55	21.91	33.59	38.67	16.82	21.28	29.4	18.24	53.02	40.34	37.51	55.36	21.91	43.99	30.38	21.52	42.06	43.04	19.57	36.78	44.29	3.34	24.53	53.32	42.77	38.73	28.74	40.95	26.03	27.91
728	ENSG00000239382.6	<ALKBH6>	58.64	55.58	59.13	69.63	71.59	58.2	48.97	57.04	63.49	72.32	105.55	49.86	62.97	77.83	65.04	56.66	65.4	68.67	68.29	69.75	52.18	60.27	64.14	53.63	60.13	41.23	53.6	50.5	51.22	55.06	47.63	60.46	53.72	75.02	44.22	64.1	50.87	81.03	62.38	68.68	66.1	66.75	67.33	57.05	80.88	73.13	48.99
729	ENSG00000125652.3	<ALKBH7>	73.4	49.49	69.98	35.16	38.62	56.63	44.22	45.78	49.26	49.62	36.87	42.57	58.79	94.95	62.37	34.97	55.51	56.82	65.45	51.55	49.17	67.65	33.17	36.6	47.3	60.29	71.31	52.4	71.02	64.79	34.15	51.56	54.39	112.31	58.81	49.07	58.37	72.23	36.38	49.7	63.57	78.9	82.42	55.89	64.54	43.79	40.08
730	ENSG00000137760.10	<ALKBH8>	10.13	9.34	8.28	7.26	12.32	9.64	6.12	8.69	9.85	8.62	5.61	12.65	6.97	11.38	8.98	6.61	9	9.14	9.95	7.63	10.04	11.5	11.07	8.03	9.95	9.57	6.27	10.54	7.89	9.13	9.68	7.96	8.07	9.33	7.96	7.34	9.24	10.14	6.84	9.15	8.27	8.68	10.54	11.16	9.62	8.65	7.33
731	ENSG00000151360.5	<ALLC>	34.35	19.28	76.72	5.83	16.86	81.98	51.19	1.51	77.84	33.37	2.65	43.13	37.67	23.25	61.52	3.38	22.39	29.54	2.36	29.45	14.15	38.29	21.69	22.51	66.35	15.1	11.91	106.55	94.68	11.4	1.2	36.94	21.14	26.94	40.97	57.8	86	11.54	52.65	2.76	22.38	3.72	45.08	29.81	13.51	21	4.73
732	ENSG00000116127.13	<ALMS1>	22.07	19.66	20.81	20.27	22.25	21.59	25.43	23.77	26.49	21.37	24.62	27	19.17	33.25	17.7	14.73	19.23	24.84	23.87	19.19	20.18	20.36	23.58	23.67	23.98	24.19	25.75	23.49	19.93	19.04	15.77	19.56	31.92	28.27	27.72	18.14	20.77	16.78	25.32	31.13	18.83	27.39	30.74	27.08	27.69	21.31	18.03
733	ENSG00000108839.7	<ALOX12>	1.19	1.24	0.47	1.88	0.56	1	0.59	0.39	0.63	0.7	0.65	0.64	1.15	0.9	0.48	0.22	0.94	0.33	0.93	1.66	1.88	1.01	0.92	1.22	0.52	0	3.04	0.23	0	0.55	0.98	0.66	0.37	1.61	1.24	1.62	0.75	0.87	0.46	0.09	0	0.19	0.45	0.84	2.14	0.79	0.44
734	ENSG00000179477.5	<ALOX12B>	0	0	0	0.42	0.12	0.25	0.36	0	0	0	0.22	0.02	0	0	0.39	0.11	0.07	0	0	0.19	0.04	0	0	0	0.07	0	0	0.04	0	0	0.13	0.28	0	0	0	0	0	0	0.35	0	2.4	0	0.1	0.24	0	0	0
735	ENSG00000161905.8	<ALOX15>	0	0	0	0.09	0.28	0	0	0	0.46	0	0.04	0	0.03	0.24	0	0	0.29	0.29	0.25	0.1	0.04	0.16	0	0	0.2	0.26	0	0.05	0	0.27	0	0.04	0.04	0	0	0.11	0.16	0	0	0.04	0.2	0	0	0	0.28	0	0
736	ENSG00000179593.11	<ALOX15B>	1.8	20.15	0.19	28.97	0.63	0.56	0.61	14.79	0	8.22	56.37	0.76	1.08	5.96	11.12	5.56	29.82	32.93	30.68	0.09	16.1	4.03	7.85	13.38	8.99	0.73	9.89	0.14	0.9	14.26	7.95	45.92	22.65	19.02	0.72	0.18	1.77	0.99	19.12	20.46	3.22	0.57	0.28	21.98	21.06	29.17	15.78
737	ENSG00000012779.6	<ALOX5>	14.6	32.32	17.63	42.67	40.27	32.01	19.42	33.49	12.15	25.71	86.97	10.64	24.18	40.35	64.95	31.68	35.47	41.3	32.58	8.93	20.64	52.58	9.77	41.55	27.41	9.95	17.65	17.27	36.7	44.68	29.52	22.29	25.13	42.02	10.29	12.63	16.29	30.81	20.95	46.94	25.03	18.78	18.57	23.28	53.12	64.06	21.97
738	ENSG00000132965.5	<ALOX5AP>	0	0	0	0	0	0	0	0	0	0	0	0	0	0	0	0.39	0	0.29	0	0	0	0	0	0	0	0	0	0	0	0.53	0	0	0	0	0	0	0.23	1.18	0	0	0.36	0	0	0	0.41	0	0
739	ENSG00000179148.5	<ALOXE3>	0.56	0.32	0.05	0.07	0.14	0	0.14	0.17	0.51	0.58	0.07	0	0.33	0.04	0	0.13	0.07	0	0.22	0	0.13	0.11	0.21	0.07	0.02	0	0.53	0.39	0	0.16	0.06	0.18	0	0	0.05	0.13	0.42	0.19	0.13	0.13	0.37	0	0	0	0.27	0.3	0
740	ENSG00000163295.4	<ALPI>	0	0	0	0	0	0	0.04	0	0	0	0	0	0	0	0	0	0	0	0	0	0	0	0	0	0	0	0	0	0	0	0	0	0	0	0	0	0	0	0	0	0	0	0	0	0	0	0
741	ENSG00000073331.13	<ALPK1>	22.12	24.4	27.04	26.8	35.82	30.54	28.28	21.2	32.52	29.7	27.81	30.36	29.19	37.56	26.03	47.39	26.88	22.59	29.66	27.05	22.46	32.98	19.54	20.77	28.24	29.45	35.42	28.96	25.56	20.69	22.52	26.38	24.99	35.96	30.92	24.12	34.61	31.23	16.8	25.83	29.6	63.68	35.89	21.57	27.23	22.76	30.11
742	ENSG00000198796.6	<ALPK2>	0	0.02	0.23	0.04	0	0	0.04	0	0.14	0	0	0.12	0	0.24	0	0	0	0	0	0.14	0	0	0	0	0	0	0.07	0	0.09	0	0	0	0	0.03	0	0	0.03	0.16	0	0	0	0.09	0	0.22	0	0	0
743	ENSG00000136383.6	<ALPK3>	1.08	2.34	1.45	1.39	1.8	4.59	0.4	2.63	0	0	1	0	0	0	0	3.75	0	1.05	0	0	1.73	2.92	0	1.2	0.02	0	1	0	0.09	0	0.56	0	0	0	0.74	1.62	0	0.89	0.85	0	0	0	0	0	0	1.81	4.23
744	ENSG00000162551.9	<ALPL>	19.61	19.01	5.04	5.94	12.15	3.19	8.38	13.39	5.68	29.63	23.94	9.15	5.85	13.14	18.32	27.66	21.97	10.15	67.22	3.03	5.9	4.23	13.06	18.3	6.36	29.47	18.2	4.98	8.74	32.37	28.37	11.06	9.36	13.56	23.17	5.56	5.74	12.46	11.78	56.94	7.33	10.79	8.1	33.45	15.67	14.16	32
745	ENSG00000163283.6	<ALPP>	0	0	0.09	0	0	0	0	0	0	0	0	0	0	0	0	0.24	0	0	0	0	0	0	0	0	0	0	0	0	0	0	0	0	0	0	0	0	0	0	0	0	0	0	0	0	0	0	0
746	ENSG00000163286.3	<ALPPL2>	0	0	0	0	0	0	0	0	0	0	0	0	0	0	0	0	0	0	0	0	0	0	0	0	0	0	0	0	0	0	0	0	0	0	0	0	0	0	0	0	0	0	0	0	0	0	0
747	ENSG00000003393.10	<ALS2>	7.09	6.18	6.74	6.06	13.96	4.86	9.29	7.59	6.98	6.49	6.28	9.1	5.92	9.1	10.36	15.42	5.09	9.82	11.47	7.84	6.59	15.32	6.57	6.51	7.71	5.7	5.64	5.03	7.86	12.2	5.12	8.18	7.01	7.48	5.22	6.62	9.19	10.8	7.15	11	7.36	5.27	6.12	9.4	7.53	11	6.14
748	ENSG00000178038.12	<ALS2CL>	29.66	16.13	46.77	16.85	19.08	45.8	26.08	21.81	53.59	31.45	12.54	29.72	37.76	30.93	27.21	11.78	25.6	13.49	20	29.87	18.12	23.63	15.15	26.93	16.94	30.37	33.83	53.61	41.03	15.08	16.91	13.6	14.35	39.86	28.77	29.66	34.28	41.85	15.99	21.54	52.47	40.2	51.14	21.77	24.32	16.51	19.67
749	ENSG00000155754.10	<ALS2CR11>	0.84	0.4	0.88	0.38	0.65	1.38	0.41	0.26	0.76	0.54	0.51	1.15	0.89	0.92	0.92	0.18	0.6	0.61	0.51	0.59	0.42	0.83	0.94	0.25	0.86	0.27	0.47	0.88	1.29	0.71	0.15	0.53	0.8	1.04	0.76	0.78	1	0.45	0.26	0.76	1.02	6.61	0.64	0.35	0.87	0.39	0.75
750	ENSG00000155749.8	<ALS2CR12>	2.24	1.76	2.19	1.25	0.92	0.86	1.24	4.94	2.43	2.25	1.29	1.11	1.69	0.66	1.22	0.39	0.92	0.92	0.27	1.25	1.48	1.06	2.19	1.41	1.69	0.4	0.28	0.63	1.02	2	1.41	0.96	2.06	1.04	2.77	1	2.08	1.78	0.94	3.65	2.85	5.16	1.71	0.67	3.7	2.94	3.32
751	ENSG00000180318.3	<ALX1>	0	0	0	0	0	0	0	0	0	0	0	0	0	0	0	0	0	0	0	0	0	0	0	0	0	0	0	0	0	0	0	0	0	0	0	0	0	0	0	0	0	0	0	0	0	0	0
752	ENSG00000156150.6	<ALX3>	0	0	0	0	0	0	0	0	0	0	0	0	0	0	0	0	0	0	0	0	0	0	0	0	0	0	0	0	0	0	0	0	0	0	0	0	0	0	0	0	0	0	0	0	0	0	0
753	ENSG00000052850.5	<ALX4>	0	0	0	0	0	0	0	0	0	0	0	0	0	0	0	0	0	0	0	0	0	0	0	0	0	0	0	0	0	0	0	0	0	0	0	0	0	0	0	0	0	0	0	0	0	0	0
754	ENSG00000183684.6	<ALYREF>	93.35	115.79	91.84	124	83.14	65.07	84.74	98.25	110.66	109.38	149.9	70.31	66.86	89.7	92.98	152.07	114.63	93.78	85.66	94.22	110.83	101.04	95.41	96.9	101.18	57.87	95.16	83.88	53.24	95.11	190.32	102.91	112.32	69.86	72.15	108.03	66.84	98.17	91.45	121.34	62.32	63.48	68.22	71.52	84.23	116.61	82.27
755	ENSG00000242110.3	<AMACR>	9.66	8.37	7.79	8.31	6.76	14.91	12.19	7	18.73	9.48	3.27	11.24	7.47	13.56	5.76	3.38	9.42	9.34	6.04	9.45	9.14	7.06	5.77	6.62	14.63	9.38	7.66	11.36	11.88	12.15	4.31	13.77	8.18	11.25	6.32	9.65	7.63	5.52	10.53	13.6	4.86	5.58	7.96	11.15	6.29	9.96	6.36
756	ENSG00000178522.10	<AMBN>	0	0	0	0	0.11	0	0	0	0	0	0	0	0	0	0	0	0	0	0	0	0	0	0	0	0	0	0	0	0	0	0	0	0	0	0	0	0	0	0	0	0	0	0	0	0	0	0.07
757	ENSG00000106927.7	<AMBP>	0.29	0	0.26	0.13	0	0.32	0.47	0	0	0.09	0	0	0.15	0.15	0	0	0.07	0.52	0.13	0.21	0.07	0.04	0.07	0.16	0.14	0	0	0.09	0.18	0.09	0	0	0	0.31	0	0.05	0.35	0	0	0	0.2	0.14	0.14	0.17	0.12	0.63	0
758	ENSG00000110497.10	<AMBRA1>	23.2	24.4	25.52	27.16	33.09	35.46	28.91	30.64	24.39	27.11	26.5	26.63	20.22	31.83	27.44	27.14	34.84	37.52	24.27	25.04	22.37	30.58	27.16	25.01	25.88	28.94	23.36	27.66	27.68	22.71	26.37	34.8	30.44	20.96	22.72	32.82	23.29	21.45	32.35	31.54	24.74	20.56	33.51	34.81	30.19	31.74	31.05
759	ENSG00000123505.10	<AMD1>	107.39	76.5	64.89	63.53	55.64	52.45	75.74	68.49	77.74	63.18	64.68	99.41	63.91	75.46	50.94	83.63	69.62	74.16	74.49	63.02	53.38	53.76	65.54	47.28	78.92	97.95	62.81	73.64	48.29	76.03	58.98	54.43	60.23	55.01	90.47	72.9	72.42	42.06	90.1	82.08	52.91	75.93	71	71.27	54.19	65.29	63.52
760	ENSG00000139344.3	<AMDHD1>	0.4	0.52	0.95	0.94	1.53	0.9	0	0.39	0.97	0	0.82	1.04	2.2	1.08	1.08	0.09	2.18	1.29	0.54	0.29	1.42	0.8	0.23	2.76	1.84	2.35	0.53	1.03	1.02	1.62	0.99	0.68	0.29	2.37	1.74	2.6	2.08	1.39	1.6	0.87	2.61	0.76	0	1.43	0.82	1.04	1.47
761	ENSG00000162066.10	<AMDHD2>	41.44	32.43	41.78	32.06	35.36	35.23	38.51	39.39	49.4	49.91	48.31	44.21	62.04	42.29	41.34	23.58	34.6	34.55	36.36	41.79	32.87	31.89	29.85	38.56	26.29	32.53	38.78	35.38	40.02	34.02	38.42	41.93	29.22	46.06	51.11	38.28	34.68	50.69	30.54	38.18	52.32	49.27	43.28	39.01	53.11	39.93	40.28
762	ENSG00000125363.10	<AMELX>	0	0	0	0	0	0	0	0	0	0	0	0	0	0	0	0	0	0	0	0	0	0	0	0	0	0	0	0	0	0	0	0	0	0	0	0	0	0	0	0	0	0	0	0	0	0	0
763	ENSG00000099721.9	<AMELY>	0	0	0	0	0	0	0	0	0	0	0	0	0	0	0	0	0	0	0	0	0	0	0	0	0	0	0	0	0	0	0	0	0	0	0	0	0	0	0	0	0	0	0	0	0	0	0
764	ENSG00000184675.5	<AMER1>	0.97	1.51	2.1	2.26	1.69	1.7	1.62	2.02	2.74	1.69	1.83	2.53	2.46	2	1.31	0.83	2.22	1.75	0.93	1.8	1.29	1.79	1.94	1.36	1.77	2.33	1.51	1.65	1.35	0.84	1.65	1.79	1.92	1.49	2.7	1.74	1.24	1.27	1.11	1.69	1.48	0.93	2.06	1.34	2.18	1.29	1.63
765	ENSG00000165566.11	<AMER2>	0.13	0.04	0	0.04	0.02	0.07	0	0	0.04	0.22	0.18	0	0.03	0.17	0	0.09	0.16	0.04	0	0.03	0	0	0.02	0.05	0.02	0	0.07	0.28	0.11	0.02	0	0.04	0	0.07	0	0	0.19	0.02	0.15	0	0.09	0.02	0.07	0.04	0	0	0.11
766	ENSG00000178171.6	<AMER3>	0.31	0.11	0.05	0.11	0	0.09	0.07	0.02	0.02	0.16	0.15	0	0.02	0.04	0.07	0.13	0.22	0.24	0.2	0	0.02	0.04	0.87	0.18	0.05	0.04	0.07	0.04	0.02	0.18	0.02	0.29	0.07	0.16	0.1	0	0	0.1	0.15	0.11	0	0.02	0.05	0.13	0.11	0.26	0.04
767	ENSG00000159461.10	<AMFR>	95.52	80.41	70.77	83.47	110.28	78.45	80.42	80.36	73.5	74.55	77.15	67.94	64.21	75.94	86.31	62.69	60.37	89.77	60.9	92.18	58.68	55.29	87.16	66.69	82.94	68.87	78.44	77.24	74.77	67.99	65.3	76.18	64.5	80.12	52.21	81.42	68.99	46.86	87.5	72.36	70.21	56.16	89.82	83.46	85.35	79.16	52.82
768	ENSG00000104899.4	<AMH>	3.23	3.53	2.36	4.47	3.01	4.41	5.22	3.66	10.92	3.58	6.72	3.62	2.86	3.03	9.46	4.95	4.94	5.36	5.21	9.59	3.52	3.08	2.31	2.39	6.99	2.75	3.44	2.93	2.89	1.91	4.33	2.95	5.55	5.96	2.87	1.65	6.07	3.75	0.83	2.17	5.45	12.53	4.39	5.54	2.41	5.6	2.24
769	ENSG00000135409.6	<AMHR2>	0.4	1.13	0.12	0.13	0.07	0.25	0.07	0.53	0.28	0.67	0.15	0.3	0.09	0.09	0.27	0	0.51	0.04	0	0.21	0.47	0.16	0.2	0.29	0.23	0.15	0.04	0.28	0.04	0	0.24	0	0.68	0.07	0.41	0.33	0	0	0.04	0.2	0.02	0	0	0.3	0	0.18	0.22
770	ENSG00000160593.13	<AMICA1>	32.57	8.61	19.85	8.22	22.2	31.11	31.88	6.01	22.39	25.69	7.97	15.46	26.83	24.7	29.44	2.99	14.58	9.64	7.68	11.77	8.21	19.67	8.76	9.88	14.13	7.59	15.44	28.15	36.11	11.95	1.58	20.53	7.96	21.63	16.26	22.95	18.42	48.02	7.54	4.81	41.45	13.81	23.47	14.49	14.34	10.65	2.33
771	ENSG00000181754.6	<AMIGO1>	17.31	16.91	14.69	11.15	18.52	19	17.74	15.84	24.82	18.96	9.08	29.79	20.67	20.2	18.25	8.68	18.04	22.56	10.64	19.22	11.75	13.58	17.5	14.71	16.63	18.93	12.1	28.66	25.44	14.69	8.1	18.29	20.13	13.32	21.95	29.1	22.75	13.57	24.21	17.72	13.68	16.27	15.07	21.21	18.26	16.51	11.45
772	ENSG00000139211.5	<AMIGO2>	6.07	7.8	6.55	6.53	6.74	20.07	9.46	19.44	8.37	9.93	5.81	6.31	8.21	10.55	5.45	3.86	5.45	6.39	7.7	15.42	3.92	14.04	14.36	9.25	13.53	5.39	5.2	9.2	8.25	7.15	15.3	9.14	10.02	5.15	6.89	12.72	14.73	14.01	7.21	11.84	16.46	3.84	10.63	15.88	6.75	8.6	15.05
773	ENSG00000176020.7	<AMIGO3>	0	5.06	5.04	1.86	0	0	0	0	4.96	3	1.63	6.08	0	0	0	0	4.84	1.97	0	4.71	4.68	0.32	1.78	0	0	0.04	0	3.65	0	0	0	0.02	0	0.17	6.75	0	5.37	4.43	1.94	4.03	0	7.23	5.84	0	0.71	2.46	4.66
774	ENSG00000101935.5	<AMMECR1>	0.45	0.88	0	0.92	1.67	0.36	0	0.61	0.25	0.65	1.16	0.53	0.26	1.54	0.8	2.25	0.22	0.59	1.25	0	1.15	1.17	0.78	0.65	1.41	1.39	0.28	0.28	1.58	0.78	1.86	0.63	0.64	0.36	0.07	0.62	0.4	0.98	0.48	0.45	0	0.34	1.97	1.88	0.83	1.81	0.49
775	ENSG00000144233.5	<AMMECR1L>	0	0	0	0	0	2.54	0	1.3	0	1.71	0	0	3.75	0	0	2.07	0	2.08	0	0	0	0	0	1.22	0	0	0	0	0	0	0	0	0	0	0	1	0	0	0.81	0	2.11	0	0	0	0	0	1.47
776	ENSG00000166126.6	<AMN>	0.57	0.58	0.33	0.9	0.58	0.34	0.72	0.35	0.56	0.86	0.56	0.32	0.93	0.13	0.04	0.41	0.4	1.2	0.44	0.31	0.33	0.32	0.57	0.54	0.23	0.66	0.49	0.51	0.27	0.45	0.68	0.35	0.22	0.35	0.29	0.6	0.28	0.54	0.53	0.39	0.68	0.46	1.27	0.15	0.66	0.35	1.45
777	ENSG00000151743.6	<AMN1>	6.46	6.05	10.03	10.44	3.63	7.6	8.93	5.84	9.88	8.6	7.15	8.94	9.72	11.67	7.69	3.64	8.15	8.4	8.35	10.97	9.45	6.9	9.51	9.59	11.46	11.01	8.41	7.56	6.33	9.35	5.59	4.11	8.4	3.42	9.42	9.43	4.65	7.7	8.06	6.94	7.4	5.53	1.85	7.86	10.76	7.8	6.85
778	ENSG00000126016.9	<AMOT>	6.09	4.68	7.65	4.83	3.82	5.39	7.15	1.23	5.54	4.34	2.34	6.59	6.06	5.41	3.34	1.09	5.41	5.53	4.03	6.11	1.66	4.72	3.86	4.15	3.15	3.83	2.42	5.94	7.1	3.2	1.16	3.8	4.27	4.67	5.96	9.03	5.06	1.76	9.66	3.67	2.11	6.71	5.56	2.51	5.74	4.2	3.01
779	ENSG00000166025.13	<AMOTL1>	27.49	38.51	30.26	44.06	35.89	37.51	34.54	41.87	32.31	26.48	43.5	39.72	35.36	30.57	24.72	53.04	27.87	35.97	28.73	28.93	39.58	34.26	30.47	28.51	33.28	22.91	24.39	37.97	39.72	38.19	53.73	30.67	31.5	22.63	25.78	39.59	34.77	27.97	41.36	33.32	32.02	25.02	41.23	33.79	35.38	43.31	38.03
780	ENSG00000114019.10	<AMOTL2>	105.58	101.18	96.13	152.34	109.4	125.58	97.33	107.25	106.18	101.03	88.63	85.35	70.63	72.68	76.16	37.31	80.36	122.92	83.39	99.17	72.4	137.9	80.09	109.65	115.57	71.89	41.61	114.47	115.71	95.54	29.08	73.6	127.47	96.12	58.4	123.32	147.64	105.68	129.8	108.54	79.06	21.76	97.42	107.09	120.78	111.73	72.25
781	ENSG00000116748.15	<AMPD1>	0.22	0.45	1.21	0.13	1.65	0.07	0.09	0.4	0	0.14	0.33	0.57	0.12	0.24	0.78	0.89	0.31	0	0.16	1.09	0.15	0	0	0.16	0.38	0.4	0.18	0.14	1.79	0	0.13	0.29	0.38	0.07	0.14	0	0.19	0.26	0	0.33	1.07	0.1	0.19	0.28	0	0.15	0.07
782	ENSG00000116337.11	<AMPD2>	56.25	82.05	87.22	95.09	78.14	76.11	108.71	96.12	97.98	104.08	116.91	73.31	98.83	55.39	186.11	94.02	72.16	80.2	78.69	112.26	70.36	59.12	56.78	75.88	62.4	69.27	80.4	111.21	154.15	61.83	129.39	61.82	69.05	75.28	78.06	83.51	125.95	89.76	51.86	84.66	150.61	100.46	224.37	61.8	110.57	85.15	65.43
783	ENSG00000133805.11	<AMPD3>	6.21	4.48	6.32	9.03	11.85	9.52	7.4	3.31	8.32	6.44	4.9	5.42	6.57	4.7	6.42	3.95	5.74	4.66	4.5	4.65	4.64	3.24	1.42	7.13	3.96	3.48	3.72	8.17	7.77	3.51	5.19	8.55	3.67	7.1	7.61	6.62	6.61	8.52	2.54	7.09	11.32	5.25	6.29	5.63	10.9	5.14	3.7
784	ENSG00000078053.12	<AMPH>	3.34	2.2	2.92	1.01	0.53	5.09	1.24	9.87	1.13	3.62	1.42	0.94	1.72	1.8	2.4	0.5	0.45	4.9	0.4	1.02	3.13	6.17	1.44	3.37	0.5	2.25	3.44	1.56	1.69	0.93	0.06	1.47	1.79	0.88	4.5	0.4	5.6	2.35	1.01	1.45	3.51	1.7	2.47	0.67	0.37	1.53	6.16
785	ENSG00000145020.10	<AMT>	58.78	52.19	164.78	79.82	123.41	122.63	85.28	50.34	137.15	55.16	62.41	122.75	111.88	108.69	158.33	42.96	86.78	71.39	66.18	127.94	60.28	141.04	86.97	77.66	113.1	58.74	68.32	102.34	116.26	55.46	26.85	73.79	73.15	111.12	88.06	108.63	112.84	114.19	64.52	68.13	186.47	124.6	147.01	45.12	96	74.28	54.19
786	ENSG00000187689.5	<AMTN>	0	0	0	0	0	0	0	0	0	0	0	0	0	0	0	0	0	0	0	0	0	0	0	0	0	0	0	0	0	0	0	0	0	0	0	0	0	0	0	0	0	0	0	0	0	0	0
787	ENSG00000237763.5	<AMY1A>	0	0	0	0	0	0	0	0	0.44	0	0	0	0.07	0	0.04	0	0	0.26	0.49	0.09	0	0	0	0.11	0	0	0	0	0.02	0	0	0	0	0	0	0.15	0	0	0	0	0.03	0	0	0	0	0	0
788	ENSG00000174876.12	<AMY1B>	0.84	0.41	0.18	0	0.09	0	0	0	0	0	0.22	0	0.07	0.17	0.04	0	0.16	0.26	0.2	0.19	0.13	0	0.12	0.22	0.18	0.24	0.19	0	0.11	0	0	0	0	0.09	0.34	0	0	0.1	0.07	0.41	0.19	0	0.09	0	0	0.48	0
789	ENSG00000187733.6	<AMY1C>	0	0	0	0	0	0	0	0	0	0	0	0	0	0	0	0	0	0	0	0	0	0	0	0	0	0	0	0	0	0	0	0	0	0	0	0	0	0	0	0	0	0	0	0	0	0	0
790	ENSG00000243480.3	<AMY2A>	0.66	0.7	3.2	0.65	0	0.29	0	0.39	0	1.08	0	0.16	0	0	0	0.39	1.28	0	3.88	0.26	1.22	0.11	0	0.54	0.18	0	0	1.82	0.14	1.31	0.19	0	0.89	0	0	0.44	1.68	0.96	0.28	0	1.41	0.6	0	0	0	0	0
791	ENSG00000240038.2	<AMY2B>	21.89	24.94	25.47	47.17	27.2	29.66	15.72	39.57	33.08	38.75	38.03	29.37	41.47	58.6	39.34	26.77	41.67	32.12	46.2	40.2	31.89	65.79	38.68	45.2	47.08	24.52	26.03	30.31	26.85	35.5	17.06	27.74	52.55	61.03	22.02	25.14	33.84	36.87	30.41	36.18	49.47	45.62	32.57	33.58	49.44	35.05	34.55
792	ENSG00000174945.9	<AMZ1>	0	0.95	0.26	0.13	0.69	0.16	0.67	2.06	0.32	0.27	0.2	0.49	0.26	0.39	0	0.35	0.22	0.35	0	0.31	0.11	0.5	0.09	0.89	0.02	0.09	0.3	0.74	0.32	0	0.32	0.13	0	0.07	0	0.18	0.07	0.54	0.41	0.72	0.7	0.19	0	0.58	0.18	0.11	1.58
793	ENSG00000196704.7	<AMZ2>	148.72	114.56	92.75	93.12	102.96	99.39	105.71	96.27	112.31	95.12	77.44	160.07	108.81	125.44	122.72	92.8	115.34	103.31	113.41	133.32	106.44	92.74	128.97	98.7	116.13	156.12	89.57	118.57	106.48	120.26	95.19	125.53	95.95	108.65	135.46	132.57	115.1	120.65	131.52	110.04	125.53	131.85	95.56	100.94	83.93	111.99	82.88
794	ENSG00000153107.7	<ANAPC1>	10.7	9.87	14.02	7.85	12.97	5.84	7.44	7.51	10.64	13.01	7.73	14.75	14.42	7.67	12.61	14.09	8.68	11.67	13.76	12.27	8.32	12.98	9.22	8.81	9.53	5.22	14.84	10.13	10.73	7.76	5.81	6.1	11.81	13.43	10.84	10.83	8.07	10.49	8.59	11.8	15.13	16.51	11.48	9.94	9.5	5.84	6.85
795	ENSG00000164162.8	<ANAPC10>	20.16	25.37	15.44	23.81	39.85	31.63	28.67	23.86	29.97	18.82	20.82	31.38	19.96	17.98	26.37	17.37	22.15	22.96	23	15.56	16.7	36.33	24.87	21.46	23.91	29.03	20.71	24.51	19.1	22.09	28.88	26.8	16.85	14.65	36.56	24.81	20.98	20.3	25.6	27.14	19.96	24.43	27.39	33.73	18.28	28.56	22.62
796	ENSG00000141552.13	<ANAPC11>	203.72	234.47	188.66	183.66	172.38	199.7	216.58	216.73	211.47	181.24	231.37	202.89	187.97	176.27	186.01	210.53	235.18	174.48	203.1	210.17	217.72	146.92	172.81	220.43	178.01	249.7	191.07	202.4	186.08	182.23	392.09	197.06	190.81	215.13	186.99	230.13	163.25	181.76	159.12	212.34	153.68	194.77	200.45	231.49	169.23	191.54	197.13
797	ENSG00000129055.8	<ANAPC13>	20.68	29.49	14.18	14.57	18.52	21.4	18.79	13.48	26.63	21.88	20.84	19.53	19.24	22.66	14.66	17.65	18.8	17.3	21.09	21.44	25.1	18.62	20.52	17.48	19.28	21.61	14.79	23	19.41	20.24	29.35	14.41	24.51	16.88	28.86	26.54	17.24	18.57	22.35	18.66	13.22	26.81	17.25	21.71	15.05	20.45	20.54
798	ENSG00000110200.4	<ANAPC15>	46.18	46.52	36.16	32.72	44.18	32.04	42.56	50.48	28.51	35.71	43.39	31.77	23.75	39.52	50.17	25.16	38.08	37.93	53.37	46.58	36.37	33.87	38.06	46.61	34.27	43.51	25.38	35.46	46.17	49.41	45.96	59.22	28.82	44.16	26.81	38.39	36.36	63.65	42.75	45.29	39.45	30.83	35.77	40.7	40.02	41.98	34.79
799	ENSG00000166295.4	<ANAPC16>	230.06	232.47	175.93	150.28	177.87	187.7	187.06	180.76	226.28	203.2	164.13	215.15	208.74	196.34	143	139.79	239.06	199.9	208.56	195.6	254.18	151.57	230.64	223.39	209.74	285.12	252.85	252.22	208.66	237.48	206.56	236.2	222.84	235.62	310.54	191.06	215.15	192.25	213.64	216.33	165.87	271.89	193.13	242.58	207.57	179.32	205.43
800	ENSG00000176248.7	<ANAPC2>	70.78	65.05	81.25	64.69	103.71	68.11	61.78	59.98	94.99	78.03	90.93	77.94	115.09	85.04	97.66	81.47	70.2	60	74.86	106.31	58.83	112	86.13	69.52	85.14	65.64	87.85	83.69	78.18	61.03	67.43	61.68	64.52	105.15	70.02	58.54	75.92	86.76	40.83	67	110.58	86.29	100.52	65.94	81.43	61.19	63.43
801	ENSG00000053900.6	<ANAPC4>	43.92	38.71	56.22	35.19	50.31	61.14	27.92	27.12	79.62	49.37	45.28	55.34	68.65	45.17	47.09	33.4	36.3	27.46	41.46	79.42	34.02	45.33	54.93	53.61	46.13	51.64	67.6	48.79	41.99	33.68	27.77	33.7	41.69	57.16	75.02	30.66	72.48	66.63	23.55	41.37	81.19	65.87	42.93	49.1	48.6	30.5	46.07
802	ENSG00000089053.8	<ANAPC5>	270.47	245.97	227.61	166.92	195.77	226.49	196.32	215.52	286.89	227.65	171.5	255.62	253.09	239.14	238.91	176.58	195.98	169.75	216.95	326.19	213.97	201	229.49	234.29	205.34	271.47	271.73	257.69	211.43	211.11	284.28	195.72	238.34	306.26	457.68	213.1	260.03	211.92	123.11	174.33	301.21	292.46	238.71	291.77	234.47	200.84	226.63
803	ENSG00000196510.8	<ANAPC7>	92.83	121.67	106.27	84.76	97.9	107.97	78.64	85.34	128.11	92.83	99.81	114.75	99.71	91.54	89.92	124.87	86.07	79.89	105.99	133.58	97.11	79.96	115.18	109.56	77.19	142.4	103.67	113.19	90.82	88.51	166.97	96.7	84.32	125.46	148.41	91.86	113.12	105.46	60.63	101.41	133.95	108.91	112.25	93.9	112.31	74.39	103.9
804	ENSG00000214274.5	<ANG>	37.01	33.25	23.65	35.77	21.4	9.61	31.45	47.55	21.49	47.73	22.27	28.63	40.72	45.91	22.28	12.17	37.24	32.95	35.16	28.05	27.43	17.49	37.56	36.58	47.21	22.8	28.89	21.11	43.47	35.33	5.12	32.09	40.03	15.07	19.52	28.37	28.75	28.66	41.33	32.04	27.32	41.01	17.02	23.15	34.92	38.17	51.22
805	ENSG00000013523.5	<ANGEL1>	28.93	17.16	25.96	21.1	20.49	24.68	23.7	10.99	22.49	21.16	15.14	29.7	22.04	24.93	19.59	23.8	20.46	25.54	24	34.38	12.51	14.02	18.87	17.65	19.53	16.16	19.55	19.27	30.08	21.6	9.41	19.17	12.98	32.64	15.12	23.26	24.92	21.9	11.32	20.37	36.79	29.29	28.31	13.08	32.03	10.91	24.27
806	ENSG00000174606.8	<ANGEL2>	35.64	29.96	35.13	33.13	58.7	38.51	32.01	28.24	46.66	47.33	38.78	38.45	58.99	51.15	70.61	39.01	31.61	38.28	65.45	50.53	41.45	64.39	48.29	39.17	51.35	31.26	42.13	45.21	54.61	45.03	16.01	42.51	45.3	42.33	45.32	37.69	56.94	47.8	33.76	56.79	58.52	43.39	57.2	33.88	58.85	52.32	48.09
807	ENSG00000154188.5	<ANGPT1>	12.57	7.69	14.67	13.66	16.72	20.03	17.67	17.43	14.74	19.18	5.7	7.49	13.68	13.25	8.08	2.79	14.14	7.98	6.59	11	16.79	28.4	13.59	23.87	4.81	16.79	9.8	21.79	25.99	11.24	6.02	15.13	16.83	10.83	16.65	16.34	29.4	20.4	12.1	10.45	21.1	13.03	18.37	14.62	9.86	10.67	12.48
808	ENSG00000091879.9	<ANGPT2>	4.4	7.49	7.95	3.11	4.45	11.02	10.73	6.14	9.3	3.4	4.52	7.47	4.87	3.27	3.15	6.63	1.57	3.15	5.28	14.08	2.86	7.46	6.31	7.58	12.22	6.71	6.74	7.66	7.91	5.38	9.58	1.55	3.87	2.13	8.42	8.27	8.61	9.97	3.54	6.68	15.49	4.06	3.19	5	4.2	3.2	4.07
809	ENSG00000101280.6	<ANGPT4>	0	0.23	0	0	0.19	0.13	0.32	0.24	0	0.32	0	0	0.53	0	0.6	0	0.02	0.39	0.34	0.19	0.2	0	0.27	1.45	1.03	0	0.54	0.89	0	0.84	0.39	0	0	0	0.12	0	0.19	0	0.63	0.8	0	0.19	1.03	0	0	0.2	0.16
810	ENSG00000116194.8	<ANGPTL1>	11.9	42.45	16.82	39.08	13.06	42.08	15.47	65.6	14.6	42.3	26.72	11.24	7.76	47.47	11.83	11.83	30.27	30.37	20.71	15.38	59.99	54.22	32.62	42.24	37.62	15.67	14.3	24.86	13.92	39.53	40.99	63.94	62.57	25.76	12.08	17.18	26.51	29.22	41.92	42.93	27.1	8.69	25.7	28.87	22.32	33.81	67.77
811	ENSG00000136859.5	<ANGPTL2>	40.97	52.61	64.78	59.31	47.02	177	77.86	56.79	83.05	51.13	31.17	45.84	32.99	46.36	47.14	26.64	30.29	42.57	26.97	33.6	50.32	47.89	14.48	54.32	24.67	49.5	30.3	71.98	57.24	46.15	21.04	34.8	26.94	22.34	28.2	89.97	105.62	77.35	44.94	45.57	59.17	25.36	85.41	21.79	58.16	46.66	52.54
812	ENSG00000132855.4	<ANGPTL3>	0.27	0.72	0	0	0.7	0.23	0.16	0.37	0	0	0.18	0.23	0.15	0	0	0	0.27	0	0.45	0.22	0.15	0.11	0.14	0	0	0	0	0.18	0.7	0.16	0	0.18	0	0.45	0	0.25	0	0.24	0.15	0	0	0.59	0	0.85	0.78	0.15	0.16
813	ENSG00000167772.7	<ANGPTL4>	0	9.52	3.97	5.14	2.92	13.98	5.58	24.64	3.18	15.99	12.98	0.57	2.94	16.24	17.86	127.36	7.9	8.51	45.67	2.84	13.24	3.52	8.17	9.21	10	11.8	9.1	5.73	8.84	52.83	49.06	13.2	29.48	2.9	17.17	6.74	7.37	19.57	5.57	17.96	4.87	0.5	12.2	15.77	10.95	11.28	35.32
814	ENSG00000187151.3	<ANGPTL5>	1.99	2.9	1.56	1.94	0.74	6	1.03	1.45	0.81	1.75	0.85	2.12	0.71	0.73	1.45	1.18	0	2.38	0.56	0	2.75	1.66	0.23	0.69	0.94	2.14	0.51	2.05	0	0.44	0.32	2.4	1.73	1.76	0	1.18	2.87	0.63	3.45	0.71	1.55	1.55	1.29	2.15	0.51	2.26	2.86
815	ENSG00000130812.6	<ANGPTL6>	0.25	0.52	1.02	0.85	0.95	0.57	0.41	0.37	0.49	0.72	0.62	0.88	1.27	0.46	0.64	0.83	0.38	0.42	0.25	1.3	0.42	0.55	0.32	0.62	0.49	0.59	1.16	1.19	1.27	0.55	0.75	0.46	0.26	0.35	0.93	0.64	0	0.59	0.11	0.2	0.55	1.12	0.68	0.52	0.87	0.52	0.82
816	ENSG00000171819.4	<ANGPTL7>	90.12	79.29	51.97	205.1	75	84.22	98.5	173.5	74.91	161.07	72.58	38.7	46.84	88.55	86.57	37.01	137.78	144.79	19.44	19.19	126.11	248.5	36.56	135.48	114.4	17.28	24.89	27.5	17.44	61.97	18.56	47.24	73.21	27.7	36.62	60.6	10.83	31.03	263.37	36.33	13.41	8.33	31.89	47.35	77.78	102.16	75.93
817	ENSG00000227059.2	<ANHX>	0	0	0	0	0	0	0	0	0	0	0	0	0	0	0	0	0	0	0	0	0	0	0	0	0	0	0	0	0	0	0	0	0	0	0	0	0	0	0	0	0	0	0	0	0	0	0
818	ENSG00000029534.15	<ANK1>	2.96	2.52	1.61	1.03	4.49	1.61	1.87	1.54	2.73	1.8	1.98	2.35	1.31	3.32	2.3	1.83	1.44	1.94	1.58	2.54	2.13	1.66	1.62	2.36	1.32	1.56	1.97	2.86	2.55	1.35	0.92	2.88	0.69	1.11	1.65	2.93	2.87	3.89	1.11	0.63	6.49	0.69	4.32	2.32	1.58	1.42	1.48
819	ENSG00000145362.12	<ANK2>	60.1	26.36	43.15	33.62	60.48	73.22	62.41	26.03	55.56	38.57	28.96	76.51	39.12	48.18	44.72	31.97	37.27	35.59	37.46	55.86	28.23	48.16	42.55	32.99	49.88	42.55	38.36	47.96	39.99	43.08	11.72	34.89	32.32	36.41	36.49	63.61	68.28	45.43	30.33	45.97	52.06	33.78	59.49	32.82	37.33	38.78	30.81
820	ENSG00000151150.16	<ANK3>	138	39.84	104.55	54.97	164.88	71.04	113.77	43.17	145.87	74.61	49.67	186.75	128.86	142.84	112.53	66.35	85.23	68.65	82.72	176.82	21.42	109.56	136.96	56.08	138.44	93.87	85.65	70.07	83.34	80.12	41.54	124.35	70.73	134.72	162.52	127.53	87.73	66.96	57.42	84.05	111.09	156.77	86.32	76.4	80.12	91.38	43.23
821	ENSG00000151687.10	<ANKAR>	27.24	12.57	23.23	9.88	11.23	22.47	15.54	10.64	23.92	17.59	7.93	26.51	24.52	19.23	14.82	8.82	17.73	13.62	20.13	22.36	10.44	12.86	17.38	13.35	17.86	12.32	14.59	18.46	18.35	14	4.35	11.93	15.99	22.91	24.75	16.88	21.73	17.62	12.17	13.8	20.55	22.88	15.02	12.76	18.33	12.03	14.83
822	ENSG00000166839.12	<ANKDD1A>	33.86	27.04	33.17	21.21	33.94	44.12	27.12	28.51	40.35	26.9	23.93	29.81	25.81	19.87	31.49	39.71	22.15	30.87	20.22	29.71	21.24	37.64	19.74	23.49	20.85	26.37	28.05	37.02	32.56	17.4	14.91	23.74	16.74	37.61	28.44	24.06	34.16	28.04	13.52	17.96	33.23	29.2	38.23	21.47	30.68	20.61	18.13
823	ENSG00000189045.9	<ANKDD1B>	2.75	1.93	4.67	1.41	3.56	3.85	4.09	0.4	8.99	2.28	1.11	5.87	2.58	2.2	5.43	0.55	1.89	1.53	1.31	4.57	2.09	3.09	1.26	2.23	1.33	3.5	2.21	5.1	3.5	2.93	2.34	2.06	1.55	2.83	5.93	4.98	2.64	1.99	2.05	1.04	4.16	4.1	8.42	2.73	3.16	2.63	0.86
824	ENSG00000132623.11	<ANKEF1>	0.14	0.38	0	0.2	0.12	0.63	0.22	0.2	0.21	0	0.34	0	0.34	0.26	0.41	0	0.4	0.33	0.16	0.21	0.51	0.25	0	0.69	0.14	0.15	0.46	0.02	0.3	0.4	0.13	1.46	0	0.12	0	0.16	0.33	0.17	0.3	1.3	0	0.36	0.87	0	0.11	0.11	0.31
825	ENSG00000153930.6	<ANKFN1>	0.09	0.61	0.56	0.29	0.81	0.5	0.92	0.68	0.76	0.16	0.84	0.37	0.81	0.5	0.46	0.09	0.29	1.01	0.16	0.61	1.06	0.83	0.41	1.23	0.4	0.92	0.39	1.26	0.77	0.35	0.47	0.26	1.15	1.09	0.95	0.84	0.51	0.14	0.39	0.61	0.89	0.29	1.6	0.5	0.39	0.61	1.54
826	ENSG00000185722.12	<ANKFY1>	11.69	11.22	15.82	13.93	18.85	12.76	9.28	8.98	14.63	14.36	12.65	12.6	16.73	15.5	17.1	7.42	10.45	9.88	13.69	16.84	7.45	14.77	12.67	10.12	12.83	7.04	12.47	12.48	14.94	11.71	6.83	10.16	11.9	14.01	14.44	13.9	14.47	11	7.06	12.86	26.87	18.68	17.48	14.62	16.38	14.29	13.12
827	ENSG00000154122.8	<ANKH>	105.63	69.82	68.55	60.51	85.16	77.95	109.11	47.05	88.45	64.68	51.63	170.04	79.14	49.65	76.55	113.2	72.92	69.27	54.91	74.35	39.47	55.66	68.49	49.82	65.07	74.92	68.58	93.05	67.61	77.14	63.91	51.94	42.27	44.87	70.33	110.03	74.01	47.26	91.39	69.63	60.91	62.57	71.81	38.86	60.6	53.13	43.95
828	ENSG00000131503.16	<ANKHD1>	148.69	167.87	153.32	155.43	244.65	133.13	139.42	167.16	155.09	157.35	173.17	162.11	184.15	176.58	173.47	179.13	130.02	164.75	185.8	179.37	134.14	215.45	160.41	150.79	161.76	122.51	153.83	152.74	162.27	161.46	110.41	135.81	170.47	183.67	144.64	134.04	180.56	167.26	119.22	169.02	184.36	165.83	192.59	162.09	204.78	164.44	181.33
829	ENSG00000254996.1	<ANKHD1-EIF4EBP3>	3.61	3.38	2.47	2.21	2.59	3.53	2.22	4.12	5.89	2.23	3.29	3.76	3.08	2.44	3.71	3.14	2.09	3	2.85	4.48	3.42	4.67	3.06	3.74	4.11	3.28	3.13	3.14	3.37	3.44	5.04	3.13	4.27	4.86	7.08	3.02	5.97	9.43	1.55	3.36	4.84	4.27	4.67	6.45	4.75	2.94	3.96
830	ENSG00000001629.5	<ANKIB1>	6.73	4.38	10.34	6.82	14.56	6.67	6.88	6.58	11.64	4.97	7.59	5.92	9.65	13.74	9.35	6.2	2.81	6.52	8.28	10.5	4.59	16.2	5.44	6.98	8.27	3.08	5.32	9.61	9.29	8.66	3.15	5.73	6.92	8.48	5.5	5.25	11.32	6.69	2.31	10.78	12.83	5.97	11.41	5.85	8.01	10.37	3.9
831	ENSG00000170209.4	<ANKK1>	0.5	0.32	0.44	0.58	0	0.91	0	0	0	1.06	1.29	0.42	0	0	0.44	0.55	0	0	0.56	0	0.51	0.25	0	0	0.95	0	0	0	0.56	0.78	0.73	0	0	0.98	0	0.29	0	0.85	0	0	0.55	0	0.51	0.35	0	0	1.69
832	ENSG00000160117.10	<ANKLE1>	0	0.63	1.24	1.18	3.12	1.54	1.48	1.62	2	1.69	0.33	1.57	0.98	0.18	0.76	0.18	0.76	0.92	1.13	0.48	0.22	1.57	0.84	0.78	0.56	1.04	1.44	0.84	0.16	0.47	1.37	0.96	1.08	0.69	1.92	2.51	0.47	0.19	0.44	0.61	0	1.62	1.55	0.8	0	0.18	1.03
833	ENSG00000176915.10	<ANKLE2>	104.07	109.3	81.34	103.47	155.92	94.21	91.8	107.64	105.91	82.49	115.88	84.25	97.16	97.79	108.17	127.24	86.09	101.01	100.25	106.88	88.9	138.99	111.8	102.72	96.94	101.45	81.76	104.11	99.6	105.53	123.41	97.93	105.22	119.06	88.55	90.15	114.03	115.6	74.94	103.23	108.21	90.46	126.69	116.92	109.65	109.09	97.02
834	ENSG00000144504.11	<ANKMY1>	28.15	23.66	19.9	19.52	21.44	24.62	26.73	25.78	24.08	24.95	26.63	19.7	31.13	26.71	24.72	16.3	33.32	27.38	27.88	25.61	18.47	22.2	27.96	19.26	23.69	18.2	28.17	28.85	19.66	19.15	24.6	25.92	23.23	26.52	35.03	16.48	23.6	24.95	18.46	20.13	28.8	41.84	22.04	18.63	32.86	22.35	24.16
835	ENSG00000106524.4	<ANKMY2>	1.42	0.31	0.6	0.9	0.86	1.16	1.12	1.89	1.18	0	0.29	2.77	1.46	1.71	0.83	0.39	1.39	1.27	0.82	1.92	0	1.08	0.5	1.8	1.64	2.13	0.56	2.72	0.7	0.31	0.3	0.94	0	1.11	2.6	0.95	1.61	0.94	1.03	1.45	0.85	2.41	1.85	1.36	0.46	0.55	1.25
836	ENSG00000164331.5	<ANKRA2>	43.36	43.89	62.42	40.88	70.78	43.92	43.57	41.02	57	60.14	35.64	58.7	77.23	55.59	54.02	37.35	40.03	45.02	58.92	51.63	37.05	55.21	67.02	58.25	48.47	41.14	50.48	60.04	49.96	32.28	13.48	42.99	68.41	65.47	56.37	38.6	54.77	49.26	29.87	53.06	81.58	75.39	77.56	59.41	68.4	52.89	48.99
837	ENSG00000148677.6	<ANKRD1>	0	0	0	0	0	0	0	0	0	0	0	0	0	0	0	0	0	0	0	0	0	0	0	0	0	0	0	0	0	0	0	0	0	0	0	0	0	0	0	0	0	0	0	0	0	0	0
838	ENSG00000088448.10	<ANKRD10>	199.55	158.55	295.91	154.71	311.82	252.75	225.95	129.5	279.11	195.99	177.13	292.17	313.34	228.7	257.81	234.64	202.19	159.06	202.44	397.63	155.08	315.32	225.56	192.7	241.42	210.02	195.04	248.01	290.25	186.4	220.02	171.65	147.88	252.16	280.93	208.81	329.25	298.68	125.84	173.14	379.33	384.48	318.54	170.3	232.7	164.31	185.16
839	ENSG00000167522.10	<ANKRD11>	91.41	121.98	87.99	109.08	119.1	102.4	94.77	107.45	95.31	80.08	100.9	96.62	89.14	93.57	102.81	101.41	94.46	98.48	86.53	98.32	62.98	111.83	97.8	87.54	102.53	66.98	83.34	80.06	93.35	97.33	126.33	99.22	97.23	96.93	85.93	100.23	79.49	83.62	91.34	109.35	91.21	90.7	98.73	103.3	113.2	107.55	85.81
840	ENSG00000101745.11	<ANKRD12>	26.65	18.54	17.57	19.67	27.16	21.27	26.75	18.83	26.7	23.84	14.01	37.97	29.7	24.9	20.78	19.22	20.3	19.52	19.48	32.08	15.59	25.2	18.8	23.9	27.03	17.03	20.39	28.43	18.8	20.57	10.82	21.68	20.04	23.45	27.65	21.34	21.73	26.35	17.89	25.71	23.35	17.77	24.1	18.22	28.61	29.49	25.99
841	ENSG00000076513.12	<ANKRD13A>	38.89	36.55	47.35	39.9	36.88	47.69	34.02	35.57	45.71	39.11	36.16	51.91	57.08	49.37	45.36	35.87	35.22	32.45	57.36	51.91	32.36	46.04	46.76	35.75	46.78	37.59	41.99	43.95	46.8	37.77	19.45	38.49	39.46	57.45	47.21	38.79	50.32	48.6	24.19	37.87	61.28	62.05	56.56	36.37	50.85	40.58	33.56
842	ENSG00000198720.8	<ANKRD13B>	44.74	24.68	45.42	30.92	28.34	38.15	34.45	18.59	50.58	45.59	35.35	48.54	56.05	37.1	41.7	21.27	43.33	39.33	38.32	68.35	24.88	33.02	43.6	38.76	54.06	36.52	62.47	39.78	35.38	29.81	28.15	36.22	34.79	60.42	65.31	49.42	38.07	41.02	25.98	33.3	55.22	74.36	44.4	37.47	35.5	31.82	27.93
843	ENSG00000118454.8	<ANKRD13C>	32.44	26.18	20.64	28.93	39.83	22.01	22.3	28.55	25.52	26.34	23.58	28.75	25.54	27.85	29.74	27.71	22.59	27.66	27.46	35.92	30.14	41.14	28.43	24.96	32	23.24	23.55	22.33	21.78	31.13	19.41	23.04	26.76	23.81	22.14	23.12	31.02	26.54	20.51	28.61	24.93	22.97	27.43	30.5	24.87	30.54	24.63
844	ENSG00000172932.10	<ANKRD13D>	130.55	113.63	124.51	121.67	109.38	150.83	106.66	101.91	147.61	124.78	127.57	125.95	113.51	120.51	120.79	89.35	113.84	105.6	123.14	146.25	93.92	113.56	92.05	115.27	108.37	142.93	141.03	118.85	142.86	81.69	99.05	106.6	92.17	173.56	134.4	97.24	107.54	115.28	88.5	110.82	178.38	167.55	152.31	114.76	129.36	112.9	108.88
845	ENSG00000134461.11	<ANKRD16>	9.97	9.72	16.51	13.73	11.93	18.17	15.26	11.5	17.53	13.31	14.14	15.32	13.04	13.82	13.1	11.39	13.55	16.01	14.09	15.62	16.56	14.18	13.4	14.22	13.48	12.48	13.68	16.79	16.92	12.22	12.02	13.2	14.64	18.28	10.35	16.25	14.61	13.59	16.28	17.7	15.22	18.59	13.17	13.58	13.65	16.19	10.96
846	ENSG00000132466.13	<ANKRD17>	61.94	49.4	53.16	46.63	52.35	50.28	49.6	44.79	67.18	54.71	43.02	70.59	57.6	69.23	44.68	61.24	62.28	45.85	51.82	51.96	46.81	51.64	58.54	49.35	57.62	42.43	53.53	66.14	49.44	53.75	56.91	44.2	53.83	45.39	61.24	62.67	45.77	39.48	67.9	49.44	57.65	56.04	56.66	49.8	61.15	47.57	55.71
847	ENSG00000180071.14	<ANKRD18A>	0.79	2.75	3.54	1.36	4.12	1.83	0.11	3.31	1.09	0.41	0.15	3.52	4.01	13.05	1.73	0.39	3.07	0.65	4.27	0.42	0.46	3.48	5.81	1.49	1.93	0.6	1.97	3.17	0.43	2.2	1.58	2.93	3.96	2.16	1.53	0.64	0.35	0.19	0.87	1.63	2.45	10.71	2.86	3.38	2.84	4.18	0.55
848	ENSG00000230453.5	<ANKRD18B>	0	0	0.3	0	0.46	0	0	0	0	0	0	0	0.26	0.46	0	0	0	0	1.02	0.42	0	0	0	0.25	0	0.37	0.46	0	0.38	1.05	0	0	0	0	0	0	0	0	0.22	0	0.37	4.05	0	0.24	0	0	0.24
849	ENSG00000165887.7	<ANKRD2>	0.5	3.15	1.65	0.98	1.34	1.2	0.29	1.07	0	0.25	0.54	1.04	0.86	0.42	0.21	0.61	1.32	0.66	0.62	0	17.58	0.14	1.21	1.11	1.15	0.27	2.14	0.7	0.61	1.36	0.54	1.51	2.9	0	0.98	0.67	2.34	0.24	1.83	0.56	3.07	0.36	0.78	1.21	1.19	0.81	1.34
850	ENSG00000196774.3	<ANKRD20A1>	0	0	0	0	0	0	0	0	0	0	0	0	0	0	0	0	0	0	0	0	0	0	0	0	0	0	0	0	0	0	0	0	0	0	0	0	0	0	0	0	0	0	0	0	0	0	0
851	ENSG00000183148.5	<ANKRD20A2>	0	0	0	0	0	0	0	0	0	0	0	0	0	0	0	0	0	0	0	0	0	0	0	0	0	0	0	0	0	0	0	0	0	0	0	0	0	0	0	0	0	0	0	0	0	0	0
852	ENSG00000132498.7	<ANKRD20A3>	0	2.56	2.31	1.23	1.99	2.51	1.53	2.77	2.22	2.01	1.43	2.84	2.43	1.47	1.45	1.07	0.74	2.49	3.72	0.38	0.76	2.41	5.22	2.27	2.32	0.86	1.95	2.28	1.52	2.45	0.36	1.05	1.46	1.73	0.74	0.87	2.15	2.89	0.3	1.99	3.17	6.18	1.38	1.73	1.31	2.77	0.92
853	ENSG00000172014.11	<ANKRD20A4>	0.5	0.22	0	0.18	0	0.39	0	0	0.12	0.2	0.25	0	0.31	0.17	0	0.42	0.11	0.13	1.11	0	0	0.27	0.14	0	0	0	0	0.11	0	0	0.02	0.31	0.11	0	0	0.22	0.3	0.23	0.09	0.13	0.26	0.43	0.58	0	0.51	0	0.11
854	ENSG00000152766.5	<ANKRD22>	0	0.31	0.3	0.22	0	0	0	0	0	0	0	0	0	0	0	0	0.56	0	0	0	0.25	0	0.64	0.65	0.14	0	0	0.39	0	0	0.53	0	0	0	0	0	0	0	0	0.07	0.02	0	0.61	0.15	0	0	0
855	ENSG00000163126.10	<ANKRD23>	29.54	16.24	23.7	19.36	29.66	18.91	16.98	13.39	19.21	15.08	22.17	17.74	23.68	16.53	24.35	12.15	21.6	19.02	17.26	25.73	12.77	22.97	33.15	17.65	21.66	12.76	20.95	21.21	13.96	15.75	12.36	19.23	13.38	28.89	29.39	16.5	16.76	25.35	12.21	22.75	31.95	28.17	14.27	18.85	19.64	15.97	17.17
856	ENSG00000089847.8	<ANKRD24>	6.09	1.82	8.35	5.52	4.88	6.95	6.54	1.93	8.74	5.63	5.45	9.82	8.55	6.38	6.49	4.52	8.24	4.15	8.66	6.44	1.99	6.24	4.92	4.32	8	7.79	8.18	4.86	7.01	5.98	2.21	5.86	4.76	7.84	5.52	4.47	7	7.53	4.67	7.09	8.76	16.27	6.26	3.36	8.49	2.63	4.34
857	ENSG00000107890.12	<ANKRD26>	7.11	4.27	7.19	4.14	3.77	7.54	5.69	3.33	7.18	4.61	3.1	7.58	8.48	7.16	4.97	3.29	4.37	5.07	5.59	8.37	3.26	5.06	5.92	5.13	5.42	3.52	5.55	10.08	5.02	5.73	0.54	4.65	5.02	6.38	12.24	5.14	8.03	5.05	3.8	5.38	7.87	6.49	6.62	5.85	6.95	4.53	5.33
858	ENSG00000105186.10	<ANKRD27>	4	5.62	8.75	3.06	4.1	4.37	2.97	2.68	4.61	4.26	3.36	6.68	7.19	4.35	4.17	7.2	4.58	2.17	6.03	5.5	5.65	5.55	5.61	3.68	3.68	2.75	5.2	11.2	6.48	3.87	3.21	4.07	5.68	4.46	6.08	4.93	6.44	3.54	2.34	3.45	10.29	3.63	5.16	1.75	6.33	4.29	5.48
859	ENSG00000206560.6	<ANKRD28>	31.24	50.9	28.01	42.76	51.15	27.96	31.23	43.34	33.22	40.6	32.11	39.39	51.73	48.77	38.42	51.67	37.76	42.02	49.74	33.17	33.29	55.06	39.85	44.18	36.99	27.78	60.64	27.49	21.28	38.61	53.93	29.92	51.4	39.84	36.95	27.97	35.35	34.21	29.78	37.77	38	50.05	38.86	49.6	36.94	37.6	52.42
860	ENSG00000154065.12	<ANKRD29>	19.66	17.93	27.92	19.49	19.05	40.36	30.87	27.04	38.32	28.03	20.7	25.87	37.38	37.01	24.56	11.39	25.47	19.83	25.88	31.2	12.53	30.15	28.46	32.66	25.03	22.65	42.29	35.45	32.9	22.97	13.9	29.84	28.73	28.39	18.11	30.64	39.84	52.31	15.73	24.01	54.77	39.1	37.38	23.13	26.54	26.2	25.36
861	ENSG00000148513.13	<ANKRD30A>	0	0	0	0	0	0	0.02	0	0	0	0	0	0	0	0	0	0	0	0	0	0	0	0	0	0	0	0	0	0	0.02	0.38	0	0	0	0	0.02	0	0.1	0	0	0	0	0	0	0	0	0
862	ENSG00000180777.9	<ANKRD30B>	20.16	3.04	10.85	2.19	7.69	6.42	9.6	4.92	9.97	5.47	4.45	20.44	17.55	7.49	12.55	4.3	4.76	6.97	8.91	20.54	1.46	5.2	16.06	5.53	11.48	5.97	13.91	13.88	4.52	14.35	0.32	4.77	4.25	13.46	22.55	8.38	10.41	10.54	1.75	8.87	25.05	10.69	10.44	3.51	13.83	2.53	4.38
863	ENSG00000163046.11	<ANKRD30BL>	0	0	0	0	0	0	0	0	0.19	0	0	0.12	0	0	0.18	0	0.07	0	0	0.1	0	0.35	0	0	0	0	0	0	0.14	0	0	0	0	0	0	0	0	0	0	0	0	0	0.14	0	0	0	0.11
864	ENSG00000145700.5	<ANKRD31>	0.13	0.07	0	0.07	0	0.29	0.11	0.09	0.16	0.11	0	0.28	0.21	0.59	0.09	0	0.16	0.07	0.11	0	0.04	0.07	0.21	0.11	0.05	0	0.04	0.26	0.14	0.11	0.26	0.11	0.26	0.29	0.19	0.24	0.3	0.3	0.48	0.22	0	0.77	0.49	0.02	0.43	0.09	0.02
865	ENSG00000133302.8	<ANKRD32>	5.12	6.21	4.48	4.11	8.36	7.15	6.41	3.73	8.46	7.14	5.5	10.11	5.56	7.41	4.21	3.95	4.55	2.87	7.12	4.34	8.36	4.88	3.98	5.77	5.68	9.14	6.71	7.22	5.04	5.95	4.56	4.18	5.9	6.91	6.57	5.13	6.32	3.43	2.29	7.61	5.01	6.84	6.45	7.13	6.52	3.73	8.1
866	ENSG00000167612.8	<ANKRD33>	1.01	0.22	0.6	0.31	0.72	0.14	0	0.48	0.7	0.81	0.42	1.24	1.67	0.35	2.12	0.79	0.13	0	0.51	0.95	0.07	0.73	1.3	0.8	0.09	1.21	0.46	2.82	0.16	0.47	0.09	0.55	0.33	0.92	1.72	0.05	0.52	0.63	0.74	0.2	0.77	0.12	0.63	0.02	0	0.09	0.15
867	ENSG00000164236.7	<ANKRD33B>	0	0.54	0.32	0	0	0	0.16	0	0.25	0	0.13	0.14	0.14	0	0.14	0	0	0	0.87	0.69	0.29	0.12	0.28	0.36	0.09	0	0.35	0	0.11	0.62	0.21	0.17	0.35	0	0.1	0	0	0.14	0.13	0.39	0	0	0.23	0	0	0.13	0.2
868	ENSG00000181039.7	<ANKRD34A>	0	0	0	0	0	0	0	0	0	0	0	0	0	0	0	0	0	0	0	0	0	0	0	0	0	0	0	0	0	0	0	0	0	0	0	0	0	0	0	0	0	0	0	0	0	0	0
869	ENSG00000189127.3	<ANKRD34B>	0	0	0	0	0	0	0	0	0	0	0	0	0	0	0	0	0	0	0	0	0	0	0	0	0	0	0	0	0	0	0	0	0	0	0	0	0	0	0	0	0	0	0	0	0	0	0
870	ENSG00000235711.3	<ANKRD34C>	0	0	0	0	0	0	0.11	0.11	0.11	0	0	0.12	0.12	0.07	0.11	0	0.07	0	0	0	0	0	0	0.02	0	0	0	0	0	0.02	0	0.28	0	0	0	0	0	0	0.13	0.04	0	0	0	0.04	0	0.07	0
871	ENSG00000198483.8	<ANKRD35>	0	0	0	0	0	0	0	0	0	0	0	0	0	0	0	0	0	0	0	0	0	0.11	0	0	0	0.2	0	0	0	0	0	0	0	0	0.15	0.11	0.12	0	0.11	0	0.2	0	0	0	0	0	0
872	ENSG00000135976.12	<ANKRD36>	53.79	33.24	60.53	39.48	40.63	42.67	43.66	24.29	55.81	48.79	29.97	73.79	81.45	56.42	49.11	32.9	39.56	39.11	76.82	70.29	28.14	45.38	48.61	48.35	39.19	50.49	63.53	57.76	55.38	39.42	17.63	32.5	39.63	87.48	56.29	36.82	65.51	36.64	25.45	42.28	60.99	66.35	59.82	35.63	66.91	26.1	32.13
873	ENSG00000174501.10	<ANKRD36C>	18.17	8.05	20.9	9.81	13.69	10.3	11.04	5.86	11.7	12.61	9.42	22.32	19.79	17.98	11.46	9.67	9.06	9.99	18.44	16.77	4.99	14.52	13.43	9.83	11.98	7.62	11.89	15.48	18.06	12.86	2.04	9.73	11.83	14.51	12.75	11.14	18.16	12.89	7.14	14.19	18.46	10.19	18.64	10.38	14.66	10.37	10.85
874	ENSG00000186352.4	<ANKRD37>	39.25	26.75	40.54	21.66	33.29	37.79	36.99	22.25	39.57	26.25	25.12	46.28	46.43	31.98	31.69	20.86	28.76	25.98	25.7	45.16	18.18	26.48	21.75	28.71	29.55	27.65	60.5	43.51	35.2	24.44	24.94	30.06	24.6	27.71	78.39	37.79	27.8	27.81	21.13	24.21	41.68	38.82	33.32	29.15	44.63	22.74	42.3
875	ENSG00000213337.4	<ANKRD39>	13	5.98	7.35	5.21	7.09	7.45	6	4.67	9.67	9.36	6.74	9.15	14.42	8.49	7.44	5.15	9.72	6.51	9.46	9.69	4.44	8.08	10.52	8.72	10.92	7.66	13.01	6.92	7.88	6.64	4.28	6.93	6.97	14.41	19.13	6.03	9.33	6.92	4.54	8.46	9.27	10.98	8	7.5	8.01	5.77	7.97
876	ENSG00000154945.6	<ANKRD40>	6.86	5.24	5.34	2.24	6.32	4.3	3.51	1.51	5.1	4.55	1.94	4.84	6.33	5.8	3.8	1.61	3.81	2.67	4.28	6.68	2.51	6.38	3.22	3.41	3.87	3.46	5.09	5.35	3.57	3.67	1.26	3.17	3.36	8.55	10.23	2.14	5.3	3.73	1.9	4.16	7.28	7.63	3.87	3.79	7.27	2.87	3.94
877	ENSG00000137494.9	<ANKRD42>	12.14	10.19	10.36	9.34	5.95	14.09	10.95	16.85	10.1	12.88	11.76	11.49	13.9	15.41	6.15	12.78	9.45	13.34	13.01	8.01	14.93	9.39	12.83	10.57	10.18	10.41	12.73	7.92	10.67	10.66	10.97	11.47	16.5	11.82	13.65	7.23	15.33	9.83	10.07	11.95	12.05	11.17	11.22	9.16	11.68	12.94	11.07
878	ENSG00000065413.12	<ANKRD44>	18.26	9.11	30.3	20.19	13.62	21.63	13.38	11.28	21.21	22.42	10.31	31.05	19.02	21.47	21.57	13.11	13.8	16.51	16.5	28.72	7.69	14.41	7.68	16.52	15.84	18.75	15.61	21.79	29.28	12.93	3.13	20.18	19.77	23.93	25.26	19.05	26.82	13.91	11.4	12.65	30.69	18.42	25.91	12.59	18.86	10.93	14.9
879	ENSG00000183831.6	<ANKRD45>	0	0.09	0.07	0.07	0.09	0.11	0	0.07	0.14	0	0.09	0.16	0.19	0	0	0	0	0	0	0.16	0	0.04	0.07	0.07	0	0	0	0	0.2	0	0	0.13	0.09	0	0.24	0.09	0.17	0	0.04	0	0	0.07	0.09	0.06	0	0	0.11
880	ENSG00000186106.7	<ANKRD46>	3.47	5.06	3.5	7.93	7.32	6.76	8.41	0.77	7.25	8.26	2.63	4.59	6.88	7.91	2.23	5.69	8.79	4.75	3.61	2.06	3.53	8.74	4.46	2.99	3.84	4.38	3.69	5.77	4.43	6.22	2.06	4.33	5.27	2.8	6.39	8.16	4.13	2.42	12.15	7.11	5.11	4.65	5.59	2.6	10	4.77	3.67
881	ENSG00000168876.4	<ANKRD49>	13.97	20.11	15.05	15	23.22	22.81	11.47	32.02	17.48	22.67	19.46	19.65	29.36	17.38	15.33	18.28	19.29	19.9	17.53	17.74	21.69	22.32	25.78	25.94	18.69	17.48	24.64	19.44	18.08	14.69	9.62	12.64	22.91	19.4	36.44	10	15.78	16.59	12.89	24.12	17.08	28.67	26.45	26.62	29.26	24.2	22.67
882	ENSG00000151458.7	<ANKRD50>	0.31	0.13	0	0	0.23	0	0.16	0.26	0.12	0	0.15	0.67	0.14	0	0	0	0.09	0	0.29	0.24	0	0.78	0	0	0	0	0.19	0	0.07	0.15	0.06	0	0	0.16	0	0	0	0	0	0	0	0	0	0.11	0	0.17	0
883	ENSG00000139645.9	<ANKRD52>	3.52	1.66	1.7	4.96	2.2	0.66	0.85	1.41	1.86	3.63	1.36	1.93	2.19	1.17	1.5	0.63	2.45	1.4	1.05	0	0	0.73	3.32	2.14	0.86	1.36	4.46	2.12	0.43	0	0.98	0	2.39	1.4	3.2	0	0.94	2.11	1.24	2.23	1.96	3.2	2.06	0.43	0	1.09	0.66
884	ENSG00000144031.7	<ANKRD53>	3.36	2.56	4.99	4.52	3.66	2.37	1.87	4.46	2.9	4.23	3.58	1.1	3.55	2.61	2.09	1.74	3.84	2.8	3.38	3.37	5.96	1.72	3.18	3.79	2.97	3.72	2.39	4.01	3.96	5.89	1.89	3.06	3.72	3.73	6.84	3.85	4.23	5.37	3.1	4.6	4.06	5.49	2.07	2.3	2.48	3.55	15.38
885	ENSG00000100124.8	<ANKRD54>	13.7	16.6	27.43	18.53	20.15	24.8	20.12	15.06	21.12	20.92	16.63	16.31	19.45	17.56	21.02	17.04	19.97	25.38	21.84	26.92	12.75	23.47	20.04	22.51	19.68	16.13	15.14	19.83	20.95	18.24	14.98	16.66	15.13	22.08	19.47	18.48	16.43	20.35	16.1	19.65	16.79	18.73	21	17.81	22.83	13.62	14.24
886	ENSG00000164512.13	<ANKRD55>	0	0	0.07	0.07	0.11	0	0	0.22	0.07	0	0	0	0.41	0.28	0.41	0	0.54	0.07	0.09	0	0.07	0.11	0.89	0.33	0.25	0.16	0.56	0.23	0.07	0.18	0.28	0.35	0.4	0.09	0.07	0	0.07	0.23	0.68	0.24	0	0	0	0.09	0.41	0.33	0.04
887	ENSG00000135299.12	<ANKRD6>	28.73	22.65	33.08	14.48	30.03	40.18	30.82	15.51	35.95	23.28	18.61	41.12	38.01	30.71	22.69	24.3	18.47	19.59	28.88	34.76	17.19	20.18	25.05	18.01	22.27	27.36	32.39	48.35	33.17	19.02	13.28	18.89	26.48	45.89	36.78	23.77	28.05	21.92	14.68	21.06	44.46	51.58	47.76	23.94	28.22	20.43	19.87
888	ENSG00000124227.4	<ANKRD60>	0	0	0	0	0	0	0	0	0	0	0	0	0	0	0	0	0	0	0	0	0	0	0	0	0	0	0	0	0	0	0	0	0	0	0	0	0	0	0	0	0	0	0	0	0	0	0
889	ENSG00000157999.5	<ANKRD61>	0	0	0	0	0	0	0	0	0	0	0	0	0	0	0	0	0	0	0	0	0	0	0	0	0	0	0	0	0	0	0	0	0	0	0	0	0	0	0	0	0	0	0	0	0	0	0
890	ENSG00000181626.10	<ANKRD62>	0	0	0	0	0	0	0	0	0	0	0	0	0	0	0.04	0.04	0	0	0.04	0	0.02	0	0	0	0	0.02	0	0	0	0	0	0.04	0	0	0	0	0	0	0.02	0	0	0.09	0	0	0.04	0	0.02
891	ENSG00000230778.1	<ANKRD63>	0	0	0	0	0	0	0	0	0	0	0	0	0	0	0	0	0	0	0	0	0	0	0	0	0	0	0	0	0	0	0	0	0	0	0	0	0	0	0	0	0	0	0	0	0	0	0
892	ENSG00000235098.4	<ANKRD65>	38.5	44.04	37.13	51.64	55.09	45.45	47.1	41.8	49.35	42.26	77.99	44.28	30.63	14.07	33.92	48.33	61.75	41.11	79.9	25.97	25.46	44.29	26.63	52.99	30.65	41.49	25.47	38.41	26.75	59.06	23.25	58.25	47.15	46.65	5.28	41.98	29.87	35.58	26.67	81.63	26.86	34.35	24.24	53.61	50.85	56.37	14.39
893	ENSG00000230062.4	<ANKRD66>	0	0	0	0	0	0	0	0	0	0	0	0	0	0	0	0	0	0	0	0	0.11	0	0	0	0	0	0	0	0	0	0	0	0	0	0	0	0	0	0	0	0	0	0	0	0	0	0
894	ENSG00000106013.8	<ANKRD7>	1.85	0.18	0.11	0.51	0.62	0.72	0.36	0.44	1.32	0.18	0	1.93	0.67	1.3	0.34	0.24	0.16	0.55	0.54	0.59	0	0.32	0.8	0.33	0.72	0.22	0.18	1.42	0.88	0.51	0	1.6	0	0.69	0.64	0.8	1.01	1.38	0.22	0.32	0.46	0.43	0.26	0.35	0.78	2	0.38
895	ENSG00000156381.4	<ANKRD9>	10.74	14.03	21.23	13.68	23.11	14.26	16.25	18.13	18.4	22.63	25.4	17.85	23.58	5.25	17.82	24.55	12.59	14.74	18.48	13.57	16.08	8.26	12.17	23.54	10.13	13.62	21.62	15.36	17.65	13.18	17.05	20.26	9.98	7.84	11.34	22.59	15.19	18.05	13.39	21.35	18.46	15.56	21.28	13.3	17.46	11.22	19.81
896	ENSG00000064999.12	<ANKS1A>	2.87	0.99	1.66	1.23	1.25	1.83	2.02	0.62	1.25	0.76	0.76	2.39	1.31	1.47	1.8	1.79	0.45	1.16	1.2	2.73	0.75	1.63	0.5	2.1	1.39	0.77	0.81	2.72	1.04	1.45	0.15	0.44	0.22	1.76	1.89	0.91	2.73	1.43	1.62	1.26	2.1	0.22	1.62	0.58	0.51	1.35	2.77
897	ENSG00000185046.14	<ANKS1B>	12.32	12.53	7.58	5.77	15.21	4.64	9.15	7.05	10.29	6.71	9.64	14.37	10.14	8	6.21	3.51	7.43	10.14	7.86	14.98	12.53	8.47	6.96	7.8	12.07	6.19	3.85	11.66	7.8	7	2.18	7.89	8.56	9.09	11	15.3	9.41	4.9	8.17	5.6	8.23	3.19	6.6	9.32	10.99	12.02	8.38
898	ENSG00000168096.10	<ANKS3>	72.81	62.64	70.1	63.59	68.65	60.57	61.33	59.14	76.7	60.57	62.81	78.88	76.61	60.91	61.68	47.69	61.3	67.41	61.93	74.23	58.17	44.16	76.16	63.35	58.36	81.3	83.71	77.06	74.61	49.23	74.97	57.71	63.85	82.52	88.97	56.8	74	56.26	46.75	60.41	91.87	98.15	70.08	61.41	67.02	50.12	56.65
899	ENSG00000175311.5	<ANKS4B>	0	0	0	0	0	0	0	0	0	0	0	0	0	0	0	0	0	0	0	0	0	0	0	0	0	0	0	0	0	0	0	0	0	0	0	0	0	0	0	0	0	0	0	0	0	0	0
900	ENSG00000165138.12	<ANKS6>	18.58	26.07	25.28	17.61	17.69	27.15	22.71	18.37	25.34	17.54	23.93	18.8	24.25	15.94	20.94	16.97	22.88	25.19	26.01	23.29	17.87	21.52	13.4	25.1	19.71	25.82	20.92	28.66	21.74	23.64	27.23	21.4	21.77	24.83	26.83	21.46	21.17	23.42	23.29	21.15	24.73	27.1	29.69	17.35	30.38	23.87	16.88
901	ENSG00000206199.5	<ANKUB1>	7.58	1.66	1.47	1	3.96	0.81	1.22	0.88	1.83	3.11	1.49	2.72	2.5	2.09	2.09	0.33	2.31	2.08	4.08	4.5	1.18	1.36	2.51	3.16	1.73	3.56	2.35	1.74	1.76	3.42	0.3	2.08	0.78	3.25	3.7	1.04	2.47	1.86	1.38	2	1.93	0.93	1.06	2.34	2.82	1.85	1.14
902	ENSG00000163516.9	<ANKZF1>	144.02	109.75	139.12	158.78	214.73	154.51	109.54	115.74	178.53	175.5	164.4	155	244.73	176.8	176.63	107.85	155.01	152.31	200.08	181.84	105.38	241.48	172.69	171.03	177.9	111.15	212.27	130.23	134.38	134.3	51.61	117.42	133.31	224.51	214.08	98.13	152.16	167.24	92.87	140.21	211.76	258.49	151.91	138.07	193.85	152.22	147.26
903	ENSG00000011426.6	<ANLN>	0.31	0.65	1	0.92	0.93	1.97	0.97	0.26	0.95	0.56	0.51	0.8	1.08	2.53	1.5	1.37	0.56	1.23	0.94	0.69	1.13	0.88	0.99	1.43	0.59	0.75	0.58	0.49	0.54	1.04	0.32	0.28	0.49	0.5	0.82	0.44	2.05	0.33	0.35	1.3	1.41	1.33	0.94	2.47	0.69	1.04	0.51
904	ENSG00000131620.13	<ANO1>	13.95	8.46	11.59	10.82	14.87	28.51	15.69	11.17	11.26	9.1	8.13	13.48	8.36	11.56	8.74	9.43	6.71	7.45	10.13	15.85	10.42	21.56	10.18	9.61	20.67	13.12	10.66	16.58	11.61	9.49	18.51	11.89	8.16	6.65	7.2	10.83	14.86	30.11	6.6	11.17	31.78	6.77	22.88	10.92	7.32	10.02	9.81
905	ENSG00000160746.8	<ANO10>	52.3	51.94	45.02	39.72	37.84	47.43	43.15	40.55	53.47	45.01	51.27	47.41	41.49	41.26	37.06	32.05	46.31	48.23	59.65	44.19	44.28	35.73	39.23	44.23	43.73	72.63	40.25	42.05	48.78	58.77	39.17	49.34	39.22	47.53	42.12	41.62	41.05	55.15	56.17	56.05	34.27	38.2	46.45	61.71	47.27	38.77	56.65
906	ENSG00000047617.10	<ANO2>	4.08	5.38	5.01	1.66	1.07	1.25	3.89	2.3	1.58	7.41	1.74	3.46	6.33	1.34	1.86	4.5	2.76	3.32	5.12	1.97	3.3	2.28	2.15	5.3	5.46	1.92	7.36	1.81	2.35	1.29	1.73	0	4.02	2.35	2.2	2.82	2.01	4.27	1.27	1.97	6.41	2.32	1.46	3.42	1.88	2.79	4.86
907	ENSG00000134343.8	<ANO3>	0	0	0	0	0	0.11	0	0	0	0	0	0	0	0	0	0	0.09	0.22	0	0	0	0.11	0.09	0.18	0	0	0	0	0.11	0	0.75	0	0	0	0	0	0	0	0.13	0	0	0	0.07	0.11	0	0.07	0
908	ENSG00000151572.12	<ANO4>	2.71	1.55	1.8	1.28	3.43	2.99	2.47	1.29	1.95	3.4	2.34	3.06	2.65	2.29	2.51	1.33	1.93	1.47	4.54	3.7	0.76	3.08	4.21	1.23	3.12	5.63	1.26	2.49	2.39	3.2	1.22	1.27	0.75	0.93	1.86	2.38	1.98	1.64	1.46	3.08	3	2.39	2.39	10.22	0.67	1.87	1.61
909	ENSG00000171714.10	<ANO5>	0.36	0.23	0	0.22	0	0	0	0	0.33	0	0.24	0	0.31	0	0	0	0	0	0.25	0	0	0	0.02	0	0.02	0	0	0	0	0.22	0.06	0.26	0	0	0	0	0	0	0	0	0	0	0	0	1.28	0	0
910	ENSG00000177119.11	<ANO6>	1.87	0.9	0.96	2.28	1.6	2.97	2.07	0.75	3.08	1.12	0.94	2	1.26	2.18	1.11	1.2	0.6	2.25	0.56	1.14	0.84	2.35	1.23	3.01	2.65	0.66	1.16	0.81	1.36	1.56	1.24	1.05	2.48	4.01	1.63	2.64	2.12	0.7	1.84	2.08	8.79	0.29	1.2	1.3	0.3	2.44	3.5
911	ENSG00000146205.9	<ANO7>	2.12	3.24	1.24	1.83	1.21	1.31	2.47	2.55	4.26	1.91	3.5	6.1	2.67	1.76	1.86	3.12	2.15	3.93	3.72	3.03	1.27	1.66	1.53	3.32	1.19	1.39	2	1.47	3.25	1.42	2.59	1.55	1.02	2	5.91	2.02	3.06	1.22	1.05	1	2.66	1.5	2.74	1.89	1.47	1.74	1.3
912	ENSG00000074855.6	<ANO8>	10.74	2.86	10.2	5.66	6.37	10.5	6.16	5.07	11.03	7.11	5.81	11.01	13.23	3.39	7.87	1.96	6.95	3.46	6.66	7.23	2.66	4.37	6.61	5.66	5.19	10.92	15.98	7.61	5.78	3.84	7.05	5.71	3.54	10.06	22.45	6.67	5.55	7.41	2.32	7.31	13.58	18.47	8.49	5.28	4.43	3.9	7.97
913	ENSG00000185101.8	<ANO9>	3.12	1.98	3.4	2.33	1.94	2.65	2.56	1.65	2.74	1.92	2.2	1.27	0.79	1.36	1.73	1.42	2.67	1.44	1.54	1.92	1.15	4.99	0.85	3.77	0.94	2.31	6.01	4.42	5.09	0.71	1.14	2.01	0.93	2.23	2.37	1.8	2.08	5.21	1.55	2.32	6.2	5.49	2.91	1.3	2.25	1.77	1.63
914	ENSG00000140350.11	<ANP32A>	151.81	129.88	170.23	141.43	124.13	160.51	164.82	126.16	204.02	135.16	127.37	199.67	151.87	234.7	106.59	116.36	148.3	143.71	182.3	177.62	143.81	128.22	143.87	151.64	175.29	226.24	166.51	159.01	177.36	160.54	149.85	147.52	178.1	170.54	203.99	177.1	165.09	161.82	147.71	150.21	170.16	238.48	167.97	176.21	154.23	148.52	142.31
915	ENSG00000136938.8	<ANP32B>	4.11	10.23	14.62	5.86	7.22	6.81	7.73	7.44	4.8	4.82	11.87	7.19	5.32	7.83	8.79	9.84	7.32	7.33	7.1	4.78	7.8	8.24	4.48	6.02	8.25	10.28	10.71	11.73	8.43	6.07	6.3	6.51	15.28	7.1	3.45	9.6	8.52	7.07	9.9	6.1	4.12	7.2	9.18	8.08	16.91	11.98	7.07
916	ENSG00000139223.1	<ANP32D>	0	0	0	0	0	0	0	0	0	0	0	0	0	0	0	0	0	0	0	0	0	0	0	0	0	0	0	0	0	0	0	0	0	0	0	0	0	0	0	0	0	0	0	0	0	0	0
917	ENSG00000143401.10	<ANP32E>	9.84	4.74	4.73	11.63	2.43	3.69	4.59	7.92	4.1	3.08	2.74	4.44	0.46	3.21	1.64	2.16	3.84	9.45	3.1	0.64	3.39	5.13	2.74	2.67	6.59	1.52	3.58	7.8	2.58	4.46	2.46	0	2.57	1.73	2.82	6.25	9.19	4.81	6.51	4.6	0.94	4.55	1.36	0.93	3.39	4.55	2.99
918	ENSG00000166825.9	<ANPEP>	37.67	87.27	31.93	59.13	25.52	30.7	25.56	40.99	27.7	61.89	73.58	36.05	27.02	48.02	41.61	7.98	44.76	34.2	48.25	22.48	74	34.96	7.99	58.78	31.46	25.9	42.43	69.14	28.56	82.47	16.35	33.88	23.8	57.21	28.55	18.77	20.52	34.34	51.98	61.17	37.39	22.78	45.48	43.5	58.1	41.17	61.93
919	ENSG00000169604.15	<ANTXR1>	7.76	7.17	13.65	3.87	7.8	19.89	7.46	4.35	11.24	7.7	3.14	13.91	6.73	5.78	5.32	10.04	5.12	3.02	7.62	5.85	3.64	9.43	2.7	4.99	6.32	5.17	11.54	14.01	17.94	4.15	5.27	4.18	4.02	4.68	9.62	13.3	11.36	7.53	7.71	6.49	25.73	18.75	6.9	4.07	6.59	4.53	11.45
920	ENSG00000163297.12	<ANTXR2>	119.71	131.47	124.12	168.12	146.71	134.99	118.02	202.64	125.33	195.79	85.07	127.42	113.84	140.07	101.34	64.93	129.41	172.01	94.42	88.4	217.26	162	133.5	156.41	135.38	127.4	76.96	140.94	120.53	162.63	62.15	160.09	250.45	92.21	131.15	136.13	112.16	110.19	226.75	98.63	75.65	107.54	92.73	100.1	120.69	184.9	215.42
921	ENSG00000198250.8	<ANTXRL>	0.22	0.27	0	0.81	0.35	0	0	0.11	0.37	0	0	0.6	0	0.35	0	0	1.05	0.46	0	0	0.09	0.39	0	0.25	0	0.11	0.47	0	0	0.22	0.04	0	1	0	0.05	0	0.49	1.59	0	1.22	0.19	0	0	0	0	0.41	0.31
922	ENSG00000135046.9	<ANXA1>	110.87	175.52	244.95	164.21	191.97	167	170.06	137.46	224.91	178.03	148.24	209.92	230.36	188.52	167.33	192.02	147.59	135.71	193.3	259.81	138.69	151.11	108.8	169.32	165.72	152.18	197.55	168.48	236.45	116.47	170.35	143.74	175.82	187.12	243.69	155.54	681.97	191.69	87.35	125.25	435.28	420.98	284.98	132.98	194.84	150.04	155.84
923	ENSG00000109511.6	<ANXA10>	0	0.29	0	0	0	0	0.38	0.28	0.47	0	0	0.69	0	0	0.39	0	0	0	0	0	0.11	0	0.12	0	0	0	0	0	0.11	0	0	0	0	0.17	0.77	0	0.23	0.17	0	0	0.12	0	1.06	0	0.19	0	0.22
924	ENSG00000122359.13	<ANXA11>	154.68	236.72	306.64	299.51	233.39	343.87	273.89	244.63	322.47	232.85	313.92	164.81	199.92	129.74	229.88	186.22	207.8	212.15	186.85	208.23	364.51	238.58	166.17	278.36	216.62	187.48	141.8	264.68	268.2	198	275.34	208.07	177.52	181.09	140.53	242.58	210.2	385.65	235.28	220.28	256.21	142.14	209.74	197.66	202.5	223.37	234.02
925	ENSG00000104537.12	<ANXA13>	0.59	2.86	0.32	0.81	0.11	0.59	0.29	1.27	0.14	1.46	1.56	1.29	0.43	0.11	0.34	1.29	1.14	0.72	1.05	0.19	2.95	0.19	0.6	0.69	0.38	0.64	0.74	0.09	0.07	0.78	1.8	1	1.02	0.93	0.6	0.31	0.19	0.35	0.52	1.24	0.29	0.65	0.33	0.71	0.11	0.33	1.25
926	ENSG00000182718.12	<ANXA2>	2326.29	2449.61	2478.31	2082.03	2482.23	2556.83	2574.43	2180.17	2414.23	2416.89	2371.62	2164.78	1633.42	2300.54	2357.22	1929.98	2117.45	2345.18	1923.03	2190.75	2069.81	2131.04	1872.27	2047.76	2704.39	2197.26	1432.63	2280.19	2230.58	2396.78	3352.48	2234.11	1861.73	2474.73	1567.16	2839.13	2648.23	2691.15	2740.68	2207.42	2064.13	1208.4	2008.16	2730.48	2192.19	2314.3	1672.56
927	ENSG00000177721.3	<ANXA2R>	0	0	0	0	0	0	0	0	0	0	0	0	0	0	0	0	0	0	0	0	0	0	0	0	0	0	0	0	0	0	0	0	0	0	0	0	0	0	0	0	0	0	0	0	0	0	0
928	ENSG00000138772.8	<ANXA3>	36.84	61	26.19	12.43	123.43	14.28	107.06	65.92	114.18	36.84	51.88	53.56	42.92	22.73	90.01	50.95	34.78	32.69	50.75	53.23	18.63	15.39	26.42	50.15	69.5	49.66	72.36	71.29	56.81	44.28	11.72	75.04	59.63	76.7	68.92	55.43	61.87	44.19	19.75	41.73	51.59	57.28	43.86	36.74	65.3	58.08	39.26
929	ENSG00000196975.10	<ANXA4>	118.79	77.71	117.56	113.15	65.22	132.95	124.15	74.35	103.2	90.38	54.73	87.91	75.31	67.26	56.8	52.65	115.82	107.99	46.54	63.28	49.08	73.11	87.71	87.22	100.51	94.22	62.56	126.08	91.45	76.94	44.2	49.95	72.28	77.96	104.7	97.29	91.41	107.32	143.12	89.32	77.05	65.15	99.06	67.37	72.05	66.14	83.9
930	ENSG00000164111.10	<ANXA5>	113.85	213.66	235.1	134.59	280.1	176.12	134.14	180.81	150.85	171.79	202.38	167.58	186.85	145.59	247.4	216	127.84	154.14	171.26	220.06	221.98	186.3	158.26	212.76	203.34	198.22	145.32	252.89	245.73	106.44	284.08	183.35	190.41	225.93	166.11	120.65	237.62	270.49	74.35	125.18	226.72	176.61	235.49	200	191.95	284.88	193.33
931	ENSG00000197043.9	<ANXA6>	64.66	136.11	140.51	70.26	42.61	77.24	75.07	86.47	59.22	67.25	127.91	55.34	74.07	54.24	68.75	60.05	115.81	73.01	71.19	47.24	135.67	62.54	69.47	119.77	67.73	81.11	77.05	69.51	69.49	52.37	68.24	58.17	60.78	89.52	96.06	69.43	78.93	161.88	63.84	63.66	75.44	73.52	66.28	58.87	63.42	56.77	88.47
932	ENSG00000138279.11	<ANXA7>	192.5	179.97	147.68	212.18	213.64	192.28	198.93	189.28	170.76	168.07	157.52	196.35	127.33	189.42	148.99	184.02	173.03	228.33	166	125.86	128.77	213.02	168.09	176.39	187.72	150.62	88.27	143.48	138.67	224.53	122.58	176.71	151.67	144.76	102.6	234.62	146.93	158.17	219.76	206.33	119.96	92.69	131.99	188.19	169.44	211.19	166.28
933	ENSG00000165390.11	<ANXA8>	3.09	0.18	1.58	0.98	0.55	0.63	0.22	0.24	0.56	5.04	0.6	1.01	0.34	1.19	1.15	0.42	0.72	0.07	0.36	0.14	0.13	1.38	0.2	0.18	0.72	3.43	1.84	0.89	0.43	0	0.36	0.26	2.45	0.83	0.15	1.16	0.7	1.13	0	3.6	3.31	0.36	0.64	0.24	0.99	0.09	0.71
934	ENSG00000150165.13	<ANXA8L1>	1.71	0	0	0	2.38	1.2	0	0.04	0	0.83	0.69	3.22	2.29	5.1	3.01	1.09	2.53	0.35	0.87	1.09	0.29	0.73	0.28	0	3.55	3.76	4.72	1.23	1.44	0.05	0.13	0.92	0	3.97	0.41	1.16	0.89	5.96	5.02	0.58	6.2	1.07	1.15	0	0.3	1.96	0.26
935	ENSG00000186807.9	<ANXA8L2>	13.81	0.81	3.34	2.21	1.88	2.58	1.86	0.59	3.71	7.29	0.62	8.04	1.33	2.17	6.47	4.97	2.09	2.64	0.93	0	0.33	6.86	0	2.36	3.03	13.27	2.16	1.79	1.78	1.04	0	4.06	5.27	7.41	0	4.05	3.5	4.57	3.5	15.03	11.93	2.89	4.63	0.28	0	2.87	3.28
936	ENSG00000143412.5	<ANXA9>	0	0	0	0	0	0	0	0	0	0	0	0	0	0	0	0	0	0	0	0	0	0	0	0	0	0.09	0	0	0	0	0	0	0	0	0	0	0	0	0	0	0	0	0	0.95	0	0	0
937	ENSG00000136250.7	<AOAH>	3.25	2.75	9.42	5.05	7.39	10.21	9.26	6.03	3.96	5.52	6.17	2.16	6.8	7.52	9.28	5.1	2.71	4.2	2.96	4.43	2.66	3.45	4.81	4.44	5.41	2.42	8.82	4.14	11.09	4.53	1.67	4.53	3.25	8.22	4.93	6.16	4.34	9.11	2.75	3.34	5.83	7.89	9.97	4.63	5.6	5.69	3.12
938	ENSG00000002726.15	<AOC1>	0.09	0.04	0.05	0	0	0	0.29	0.09	0	0.04	0.2	0	0.29	0.11	0	0	0.04	0.13	0.16	0.45	0	0.07	0.14	0	0.02	0.13	0.04	0.11	0.16	0	0	0	0	0.17	0.1	0.09	0.31	0.1	0.18	0.04	0	0.48	0.24	0	0	0.02	0.11
939	ENSG00000131480.4	<AOC2>	0	0.95	1.54	0.67	1.21	1.43	0.83	0.85	1.92	0	1.69	0.95	0	0	0.27	0.66	1.41	0.35	0.58	0	0.95	0.97	0	1.18	0.32	0	0.37	0	0.34	0.78	0.36	0.07	0.44	0.47	0	0	0.38	0.38	0	1.21	1.4	0	0.31	0	0.41	0.37	0.86
940	ENSG00000131471.2	<AOC3>	22.61	16.89	45.84	23.74	17.23	70.16	51.58	38.4	37.99	31.32	29.23	15.71	21.32	18.66	28.1	22.8	25.13	11.15	19.84	30.59	79.74	38.1	25.78	56.88	57.17	20.36	30.63	56.88	47.32	20.4	22.33	44.42	28.62	19.3	27.1	26.92	72.25	107.01	24.99	36.46	149.9	14.51	56.35	18.46	22.46	16.93	54.74
941	ENSG00000138356.9	<AOX1>	41.92	244.43	41.75	258.18	39.9	69.44	36	210.78	42.35	156.19	216.92	13.45	40.35	78.78	56.62	65.13	100.89	193.63	77.72	15.42	318.38	92.25	56.76	245.02	61.35	76.37	64.23	41.77	42.89	119.18	54.63	70.98	212.2	86.36	58.61	35.48	64.53	57.59	191.67	165.77	34.41	12.79	59.92	138.46	177.52	168.45	279.25
942	ENSG00000267954.1	<AP000349.1>	0	0	0	0	0	0	0	0	0	0	0	0	0	0	0	0	0	0	0	0	0	0	0	0	0	0	0	0	0	0	0	0	0	0	0	0	0	0	0	0	0	0	0	0	0	0	0
943	ENSG00000187811.3	<AP000867.1>	0	0	0	0	0	0	0	0	0	0	0	0	0	0	0	0	0	0	0	0	0	0	0	0	0	0	0	0	0	0	0	0	0	0	0	0	0	0	0	0	0	0	0	0	0	0	0
944	ENSG00000268467.1	<AP000889.3>	0	0	0	0	0	0	0	0	0	0	0	0	0	0	0	0	0	0	0	0	0	0	0	0	0	0	0	0	0	0	0	0	0	0	0	0	0	0	0	0	0	0	0	0	0	0	0
945	ENSG00000215504.2	<AP000974.1>	0	0	0	0	0	0	0	0	0	0	0	0	0	0	0	0	0	0	0	0	0	0	0	0	0	0	0	0	0	0	0	0	0	0	0	0	0	0	0	0	0	0	0	0	0	0	0
946	ENSG00000224130.1	<AP001652.1>	0	0	0	0	0	0	0	0	0	0	0	0	0	0	0	0	0	0	0	0	0	0	0	0	0	0	0	0	0	0	0	0	0	0	0	0	0	0	0	0	0	0	0	0	0	0	0
947	ENSG00000254531.1	<AP001816.1>	13.39	5.51	16.24	18.08	10.95	14.69	13.87	12.84	13.45	13.12	16.05	11.98	6.66	13.14	1.61	4.56	19.97	6.45	19.46	11.94	7.54	6.53	10.59	7.62	11.17	11.11	14.09	13.94	12.9	1.13	0	9.9	16.13	8.4	6.2	13.47	11.29	12.82	8.54	7.11	11.35	19.18	13.23	10.24	8.51	11.5	12.52
948	ENSG00000179038.7	<AP001885.1>	0	0	0	0	0	0	0	0	0	0	0	0	0	0	0	0	0	0	0	0	0	0	0	0	0	0	0	0	0	0	0	0	0	0	0	0	0	0	0	0	0	0	0	0	0	0	0
949	ENSG00000204306.2	<AP002348.1>	0	0	0	0	0	0	0	0	0	0	0	0	0	0	0	0	0	0	0	0	0	0	0	0	0	0	0	0	0	0	0	0	0	0	0	0	0	0	0	0	0	0	0	0	0	0	0
950	ENSG00000268472.1	<AP002884.2>	0	0	0	0	0	0	0	0	0	0	0	0	0	0	0	0	0	0	0	0	0	0	0	0	0	0	0	0	0	0	0	0	0	0	0	0	0	0	0	0	0	0	0	0	0	0	0
951	ENSG00000272790.1	<AP002884.3>	0	0	0	0	0	0	0	0	0	0	0	0	0	0	0	0	0	0	0	0	0	0	0	0	0	0	0	0	0	0	0	0	0	0	0	0	0	0	0	0	0	0	0	0	0	0	0
952	ENSG00000268936.1	<AP003062.1>	0	0	0	0	0	0	0	0	0	0	0	0	0	0	0	0	0	0	0	0	0	0	0	0	0	0	0	0	0	0	0	0	0	0	0	0	0	0	0	0	0	0	0	0	0	0	0
953	ENSG00000269089.1	<AP003733.1>	0	0	0	0	0	0	0	0	0	0	0	0	0	0	0	0	0	0	0	0	0	0	0	0	0	0	0	0	0	0	0	0	0	0	0	0	0	0	0	0	0	0	0	0	0	0	0
954	ENSG00000181908.4	<AP003774.4>	0	0	0	0	0	0	0	0	0	0	0	0	0	0	0	0	0	0	0	0	0	0	0	0	0	0	0	0	0	0	0	0	0	0	0	0	0	0	0	0	0	0	0	0	0	0	0
955	ENSG00000138660.7	<AP1AR>	2.35	4	1.17	9.19	3.73	4.44	3.1	5.4	5.38	4.91	6.17	3.98	4.78	4.55	5.13	4.6	4.01	5.29	4.66	2.75	4.75	4.79	3.13	5.31	1.98	1.69	1.39	1.77	2.39	3.18	4.93	4.85	1.9	5.75	0.74	3.07	4.51	2.4	1.94	6.36	7.02	0.96	2.75	3.47	2.73	4.66	3.21
956	ENSG00000100280.12	<AP1B1>	63.24	63.77	65.01	96.72	66.99	67.49	76.17	77.42	75.91	75.42	95.92	54.11	56.93	90.07	86.75	76.04	82.21	74.12	86.07	56.95	55.62	63.05	59.61	75.25	60.6	65.79	53.81	64.91	75.5	68.5	82.23	77.64	67.72	84.46	49.31	70.12	56.36	66.51	61.28	93.64	69.79	63.49	84.51	82.07	92.01	94.39	75.42
957	ENSG00000166747.8	<AP1G1>	31.98	28.57	39.23	24.83	39.66	31.99	23.47	16.35	28.58	27.27	29.23	38.54	28.91	25.48	25.29	22.8	24.88	28.95	31.86	30.4	16.45	45.24	19.81	24.18	32.72	20.76	36.21	25.59	26.71	21.97	21.58	20.39	27.62	36.28	36.16	27.34	30.52	37.39	21.26	25.66	40.05	32.26	26.82	30.59	36.48	17.01	36.82
958	ENSG00000213983.7	<AP1G2>	122.69	96.83	128.81	93.84	97.6	121.73	89.23	119.34	88.38	114.55	84.4	80.38	160.4	132.25	91.76	58.89	124.29	76.87	75.26	72.57	66.46	80.84	74.51	116.73	75.14	124.34	148.32	136.28	137.02	73.05	76.92	108	92.88	156.45	154.68	92.11	113.52	115.07	62.35	88.07	151.42	203.52	141.82	89.76	134.59	92.93	108.55
959	ENSG00000072958.4	<AP1M1>	44.31	72.38	55.66	69.25	48.78	50.71	54.21	62.54	59.22	47.71	82.47	41.74	53.62	37.74	44.81	41.63	76.17	53.42	51.99	52.12	58.77	40.13	49.91	48.46	55.08	57.47	68.51	61.49	61.15	51.5	47.22	49.12	47.46	65.86	50.61	49.71	54.59	74.09	58.13	56.4	77.35	62.32	54.96	60.58	70.23	49.45	69.15
960	ENSG00000129354.7	<AP1M2>	0.75	0	0.39	0.58	0.72	0	0	0	0	0.18	0	1.25	0	0.44	0.09	0	0.22	0.74	1.16	0.74	0.15	0.19	0.82	0	0.14	0.22	0	0.14	0.7	0.18	0.15	0.35	0	0.24	0	0.05	0.38	0.68	0.53	0	0.29	0.38	0.1	0.95	0	1.04	0.27
961	ENSG00000106367.9	<AP1S1>	24.89	15.88	14.95	15.45	9.95	28.8	18.06	19.25	28.4	23.41	22.49	14.91	13.34	32.18	9.97	2.33	18.47	14.61	12.25	14.62	14.93	8.81	16.93	13.86	18.18	18.69	8.69	11.92	18.89	20.62	26.63	15.74	18.89	16.05	18.44	34.88	18.35	7.53	21.43	17.14	15.03	21.83	24.83	27.57	16.59	10.96	17.67
962	ENSG00000182287.9	<AP1S2>	22.44	16.53	14.6	9.48	24.34	12.58	14.64	10.62	19.42	14.54	17.3	22.33	20.24	16.66	32.68	20.47	16.92	13.51	26.05	31.46	6.57	15.63	29.42	15.8	22.07	9.46	12.49	11.78	15.37	19.66	40.77	19.15	13.65	36.22	23.01	13.49	26.04	18.23	8.37	19.85	26.6	20.61	14.38	25.1	20.24	16.1	15.27
963	ENSG00000152056.12	<AP1S3>	2.51	1.01	1.07	0.72	2.5	0.86	1.98	2	0.97	0.41	0.91	4.22	1.34	0.24	2.44	0.52	0.7	0.88	1.98	1.16	1.11	2.3	1.19	0.98	1.86	0.93	0.37	1.33	1.13	1.2	1.78	1.38	0.38	0.71	2.73	1.76	1.38	1.12	0.81	0.89	3.41	3.41	3.07	1.34	3.3	0.3	0.29
964	ENSG00000196961.8	<AP2A1>	36.07	41.79	35.22	41.6	39.97	54.39	37.46	40.36	50.09	45.3	73.72	47.2	49.61	38.59	60.46	52.32	39.42	37	49.46	42.25	36.23	44.66	47.53	33.7	44.92	48.23	55.36	37.57	46.3	47.23	40.28	50.43	38.4	50.43	40.58	38.86	44.08	46.12	24.36	50.76	71.3	48.45	42.39	39.21	34.44	32.63	44.75
965	ENSG00000183020.9	<AP2A2>	149.74	143.96	155.82	133.99	111.23	167	137.51	120.42	161.07	160.98	149.28	149.06	177.3	141.35	130.11	142.84	153.11	147.23	159.95	148.24	122.57	133.92	143.09	170.7	133.81	165.06	192.45	170.43	161.13	166.77	156.23	143.78	146.11	202.76	152.51	164.85	143.55	137.64	120.14	159.97	180.78	174.68	187.26	157.71	190.09	138.52	153.38
966	ENSG00000006125.12	<AP2B1>	17.69	17.32	21.57	19.85	19.8	15.09	16.95	16.3	16.67	15.92	13.72	26.08	21.34	21.98	19.06	19.22	22.53	22.93	20.22	26.98	11.77	17.86	20.68	15.94	23.5	16.49	16.3	18.23	22.57	18.8	16.75	21.22	22.94	18.63	19.78	23.45	24.13	19.43	22.33	25.66	18.08	14.98	23.66	22.77	24.92	25.62	23.83
967	ENSG00000161203.9	<AP2M1>	239.9	274.87	382.5	272.45	268.52	288.43	217.93	326.68	236.2	247.17	274.67	313.1	279.51	311.27	332.91	288.92	250.55	230.54	232.58	327.83	212.87	231.05	255.16	323.35	228.93	240.02	297.76	353.21	297.84	254.92	230.88	217.43	260.16	274.64	356.57	231.17	265.21	238.49	253.8	251.88	442.79	290.91	338.43	245.66	264.06	323.29	265.12
968	ENSG00000042753.7	<AP2S1>	61.06	56.34	54.86	63.08	29.69	61	18.93	74.06	21.35	50.55	49.8	24.6	38.65	30.99	34.68	54.61	34.21	18.41	40.24	76.17	52.25	26.81	44.45	74.27	30.7	43.98	56.36	26.75	25.89	29.35	62.5	27.43	43.95	27.61	52.42	36.77	24.32	72.12	35.66	30.3	39.21	44.88	41.02	23.39	39.12	34.29	73.9
969	ENSG00000132842.9	<AP3B1>	43.88	56.44	46.21	50.85	43.86	47.2	45.6	49.68	49.19	49.22	62.16	56.37	43.09	59.63	40.03	41.11	51.71	44.71	54.55	51.1	62.32	47.96	47.1	49.35	52.6	59.85	38.16	52.05	43.05	55.66	62.61	53.14	49.72	49.73	42.81	53.78	41.17	52.92	51.8	62.25	52.57	44.52	53.7	62.23	50.89	54.11	58.32
970	ENSG00000103723.8	<AP3B2>	2.48	6.07	4.22	11.02	3.4	3.23	6.59	5.16	6.3	4.59	6.15	4.26	6.32	4.95	4.7	4.23	7.63	5.1	3.5	6.07	3.41	5.8	2.97	2.58	10.61	5.02	5.59	5.26	4.31	8.64	41.26	4.88	5.86	9.71	5.53	3.33	4.65	7.67	4.26	5.58	9.92	10.81	1.92	6.72	5.65	3.38	3.68
971	ENSG00000065000.11	<AP3D1>	107.23	116.49	97.13	105.29	101.39	89.01	100.9	118.31	111.65	93.59	116.18	100.84	117.64	92.82	94.78	124.19	96.29	106.2	98.16	115.19	104.43	93.1	96.33	107.46	102.15	103.12	121.97	104.65	112.21	91.52	140.77	94.63	90.97	122.93	129.93	107.76	110.34	91.04	94.31	118.35	130.11	126.08	131.89	99.62	111.92	102.45	118.98
972	ENSG00000185009.8	<AP3M1>	7.49	6.14	6.18	8.2	11.21	13.57	7.51	7.05	9.57	12.05	4.81	8.87	9.03	7.1	7.39	5.98	6.68	7.81	9.53	6.52	5.63	12.11	8.72	8.23	7.46	3.72	4.48	6.66	6.28	10.17	3.11	7.24	6.39	6.51	8.22	7.74	8.29	8.26	7.86	9.61	7.23	5.97	5.84	7.28	9.96	6.9	8.71
973	ENSG00000070718.7	<AP3M2>	38.3	35.52	38.49	28.55	28.8	39.59	32.17	20.52	41.15	27.58	24.45	43.11	28.36	40.57	27.21	20.36	28.67	34.5	24.2	42.83	26.3	29.06	33.05	28.69	31.89	35.7	28.26	40.39	34.62	30.15	29.98	26.64	30.33	32.19	43.52	38.4	37.37	30.51	26.5	28.26	45.86	48.72	39.12	32.64	33.57	33.74	29.93
974	ENSG00000177879.10	<AP3S1>	76.13	115.97	74.45	63.48	80.78	74.71	81.01	70.9	62.75	65.52	71.07	109.29	94.89	109.94	93.68	63.45	81.74	71.78	80.03	111.66	80.77	74.05	84.85	71.04	80.6	106.27	76.52	95.94	80.65	75.65	68.97	79.15	89.45	83.49	99.22	63.19	89.66	73.01	71.09	72.39	80.97	65.54	84.7	91.24	70.26	99.14	79.14
975	ENSG00000157823.12	<AP3S2>	19.86	25.57	21.93	23.41	26.58	14.12	15.31	23.22	18.94	32.83	10.69	21.19	14.39	25.82	13.58	24.52	20.96	26.96	22.33	11.65	16.46	20.44	21.28	31.01	25.64	25.8	18.99	19.09	15.62	33.68	21.92	22.91	21.68	16.47	36.64	21.56	12.3	19.78	30.76	24.1	11.84	25.19	12.16	25.56	20.08	26.93	27.75
976	ENSG00000134262.8	<AP4B1>	47.96	33.16	64.15	24.23	38.2	66.43	50.39	19.33	63.44	32.99	29.54	69.25	64.53	47.91	36.53	25.13	38.9	31.79	37.65	54.71	32.49	44.74	47.4	44.56	33.12	63.06	63.98	66.19	55.25	31.28	35.57	31.28	39.22	60.18	68.44	40.22	61.64	40.32	25.36	36.96	71.85	91.16	44.36	34.27	38.82	27.18	29.14
977	ENSG00000081014.6	<AP4E1>	3.02	0.45	0.14	1.74	1.53	0.09	0.94	0.53	1.49	0.49	0.64	1.02	2.67	2.7	0.41	4.1	5.27	0.66	0.53	0.26	8.03	2.35	2.36	0.49	0.31	4.76	0.3	0.23	3.09	5.67	0.92	0.39	5.11	0.28	3.71	1.11	1.19	2.18	0.35	0.2	6.49	2.39	3.14	4.07	2.07	0.2	0.49
978	ENSG00000221838.5	<AP4M1>	34.83	39.63	51.51	40.62	32.28	63.01	39.88	33.82	59.09	38.39	38.58	35.52	42.39	47.78	45	27.56	30.89	38	42.95	43.24	35.35	37.19	30.15	34.93	29.98	36.12	42.29	44.61	47.14	36.04	34.58	49.69	40.83	46.72	43.77	51.18	39.75	49.16	37.23	35.4	50.97	52.7	52.45	37.37	50.06	31.7	31.05
979	ENSG00000100478.10	<AP4S1>	14.29	8.01	10.17	8.05	11.32	7.85	11.22	11	16.2	11.46	6.52	20.9	10.45	7.52	12.64	8.68	11.26	11.65	11.29	16.87	12.55	6.21	12.33	12.17	15.75	11.49	14.49	11.25	10.33	11.82	15.64	9.99	9.82	9.19	12.99	12.38	10.83	12.53	12.39	12.54	19.8	13.57	10.68	15.92	10.09	10.48	8.56
980	ENSG00000254470.2	<AP5B1>	0	0	0	0	0	0	0	0	0	0	0	0	0	0	0	0	0	0	0	0	0	0	0	0	0	0	0	0	0	0	0	0	0	0	0	0	0	0	0	0	0	0	0	0	0	0	0
981	ENSG00000053770.7	<AP5M1>	3.03	5.56	2.59	3.76	7.06	7.26	2.07	3.97	6.24	6.66	4.1	6.08	5.56	6.33	4.53	3.21	2.54	4.07	4.32	4.5	4.75	10.65	5.35	5.59	8.32	1.14	4.43	4.28	2.71	5	1.39	3.23	2.06	3.61	4.97	4.29	4.32	7.3	4.39	6.53	8.96	2.51	4.36	2.8	6.24	6.32	5.55
982	ENSG00000125843.6	<AP5S1>	4.88	2.84	4.06	2.79	2.87	5.38	4.25	3.38	2.41	5.22	6.34	2.65	4.53	4.33	3.57	1.59	3.64	4.11	0.76	8.34	1.78	2.71	3.46	5.13	1.51	0.6	4.14	2.95	3.21	4.55	4.99	4.76	1.53	4.86	1.13	6.43	7.02	4.77	2.27	2.34	3.08	8.37	3.31	6.74	7.83	3.18	4.91
983	ENSG00000242802.2	<AP5Z1>	21.31	25.22	24.94	24.57	27.74	22.92	23.02	18.21	29.95	20.92	32.15	26.26	24.02	20.16	33.67	30.85	16.99	24.57	23.13	23.88	27.88	33.92	20.64	27.66	23.28	16.84	24.97	29.01	22.41	22.42	38.39	24.04	17.58	27.06	20.07	20.25	22.47	29.6	17.68	30.15	26.38	24.88	25.67	21.21	30.54	27.99	27.44
984	ENSG00000120868.9	<APAF1>	12.5	8.8	14.46	12.38	12.37	21.02	12.32	9.98	17.31	13.98	9.33	13.43	15.82	13.19	13.53	6.24	11.89	11.11	14.96	15.78	12.91	15.53	7.76	14.33	16.38	9.73	13.8	14.92	14.55	13.2	3.47	10.89	12.28	14.01	8.52	12.94	13.16	12.37	7.97	11.21	13.38	13.38	19.88	11.94	13.52	9.48	9.82
985	ENSG00000107282.5	<APBA1>	0	0.68	4.8	0	5.12	4.66	0.79	0.83	2.36	3.4	0.76	1.82	0.69	0	0	1.85	2.13	1.03	0.98	1.04	0	4.76	1.53	3.68	1.21	0	0.81	1.7	1.52	1.44	0	2.53	1.48	0	0	2.2	0.98	0	0.98	1.24	0	0	4.06	0	1.81	2.46	4.75
986	ENSG00000034053.10	<APBA2>	5.75	4.05	3.06	1.59	1.87	4.44	2.23	2.7	2.94	3.42	2.38	1.91	4.56	2.66	2.26	2.88	2.35	2.25	1.43	1.63	1.33	3.4	1.9	2.29	1.39	4.65	1.79	3.96	5.44	1.98	4.35	1.55	2.04	1.94	2.82	2.64	3.01	2.14	1.97	0.91	3.48	2.43	2.23	2.54	5.81	1.94	2.42
987	ENSG00000011132.7	<APBA3>	28.8	22.04	31.63	18.91	26.02	31.54	19.74	24.82	43.99	26.93	27.74	49.92	40.44	37.19	27.67	29.81	26.94	28.56	27.45	48.85	17.67	25.98	33.88	22.04	22.36	28.7	44.68	34.18	38.78	20.82	30.19	31.35	25.01	31.29	42.28	23.03	31.64	27.67	19.09	27.57	58.52	59.67	27.29	23.93	25.63	24.92	25.44
988	ENSG00000166313.14	<APBB1>	37.18	63.84	73.46	50.12	84.54	66.99	42.92	63.8	70.32	61.96	79.71	45.31	80.3	53.48	72.98	44.79	69.19	43.55	50.86	71.96	52.07	58.5	68.37	76.08	55.46	62.95	62.33	71.08	70.19	57.1	44.33	75.72	60.1	72.02	62.92	50.53	44.5	68.29	57.7	34.06	85.02	87.87	81.95	69.92	67.85	38.78	51.17
989	ENSG00000077420.11	<APBB1IP>	9.93	18.51	18.68	18.66	9.28	26.4	17.29	12.69	23.2	11.32	24.94	8.11	14.9	27.91	6.6	6.28	22.44	19.9	9.04	6.73	37.94	12.5	6.54	27.48	10.96	15.03	8.32	13.27	23.05	13.18	12.17	18.05	19.73	14.76	11.33	15.92	15.5	20.77	15.07	18.16	20.72	9.23	19.74	12.3	15.28	23.05	17.1
990	ENSG00000163697.12	<APBB2>	68.57	73.93	99.37	57.22	89.96	80.95	50.81	47.67	83.95	94.14	53.54	59.32	59.39	69.06	95.42	28.04	58.18	64.22	87.16	65.75	73.18	92.09	57.78	97.81	78.99	58.55	52.07	96.71	83.25	70.07	23.61	58.08	77.13	114.33	57.16	57.6	78	71.51	54.22	62.28	94.21	34.11	122.55	94.87	85.37	53.91	67.41
991	ENSG00000113108.13	<APBB3>	162.3	128.68	222.09	147.4	126.91	179.92	207.68	106.66	207.34	177.4	188.98	205.01	203.96	181.64	172.96	120.46	162.82	152.35	203.51	259.15	125.34	163.61	139.25	153.54	167.68	149.51	199.02	193.81	200.77	124.35	109.78	129.47	153.08	212.19	194.24	150.54	174.4	214.57	115.83	170.23	287.32	337.05	231.99	143.55	215.76	140.61	148.49
992	ENSG00000134982.12	<APC>	3.84	1.53	1.68	3.28	3.93	2.44	2.2	2.66	2.5	1.64	1.91	3.69	1.67	2.55	2.07	2.94	2.94	3.24	4.48	1.33	0.6	4.16	3.13	1.8	3.68	1.28	1.23	4.1	1.79	2.71	1.39	1.66	4.03	3.77	1.62	2.25	4.36	2.96	4.39	3.17	5.23	1.77	2.98	2.19	3.78	1.79	2.62
993	ENSG00000115266.7	<APC2>	11.53	8.1	19.92	8.45	10.31	16.54	16.03	3.31	14.4	7.32	27.5	4.42	7.85	7.52	18.2	7.83	38.77	21.4	13.47	21.51	3.44	26.02	2.54	9.58	13.08	4.67	3.5	7.08	5.24	4.8	3.24	16.66	3.29	45.15	2.17	11.38	3.66	9.97	4.17	11.91	3.12	18.87	6.12	19.91	18.59	13.2	8.6
994	ENSG00000154856.8	<APCDD1>	52.52	52.9	31.23	111.57	61.77	55.5	79.82	46.26	55.42	48.81	97.87	47.64	27.55	113.44	40.9	23.74	92.97	113.41	42.35	43.07	47.46	68.04	81.41	72.33	104.74	27.54	31.6	39.3	19.05	76.49	18.85	81.18	63.92	65.21	44.05	74.95	19.47	19.99	124.36	93.4	20.45	30.59	36.52	78.35	84.68	88.57	42.59
995	ENSG00000198768.6	<APCDD1L>	0.32	0.04	0	0	0	0.14	0.16	0	0	0	0	0	0	0	0	0	0	0.02	0.25	0	0	0.19	0.12	0	0	0	0.02	0	0.02	0	0	0	0	0	0	0.15	0	0.1	0	0	0	0	0	0	0.02	0	0.51
996	ENSG00000132703.3	<APCS>	0	0	0	0	0	0	0	0	0	0	0	0	0	0	0	0	0	0	0	0	0	0	0	0	0	0	0	0	0	0	0	0	0	0	0	0	0	0	0	0	0	0	0	0	0	0	0
997	ENSG00000164062.8	<APEH>	91.52	98.77	78.09	85.19	59.21	81.45	85.17	94.25	90.08	77.34	104.48	53.05	74.29	88.33	75.12	69.62	86.94	87.19	81.03	64.8	60.16	92.5	85.72	77.57	67.55	65.63	67.35	73.26	82.14	80.65	104.56	78.38	68.66	84.78	63.54	73.83	58.77	97.09	74.76	90.56	74.17	71.43	55.25	78.87	78.74	84.74	74.13
998	ENSG00000100823.7	<APEX1>	102.13	126.95	72.83	128.89	165.04	120.91	101.06	146.59	113.46	86.16	178.65	71.74	84.41	89.98	150.2	151.22	89.83	138.51	144.49	95.15	143.7	156.62	128.36	117.18	108.92	95.19	75.13	67.07	76.42	138.04	166.41	116.13	130.61	105.17	69.93	101.43	89.68	135.13	87.54	130.13	84.19	54.37	103.9	130.35	110.48	165.16	112.46
999	ENSG00000169188.4	<APEX2>	0.38	2.38	0.79	1.18	4.38	4.32	0.97	4.04	2.39	0.86	4.38	0	0.6	1.01	2.49	2.71	0.69	1.46	1.89	0.97	2.24	3.25	1.42	0	1.03	0.86	0.79	0	0.72	3.26	3.6	1.75	0.99	0	1.27	3.73	2.45	2.4	1.7	2.58	1.57	0	1.93	3.47	0.67	1.74	0.82
1000	ENSG00000117362.8	<APH1A>	191.71	192.2	182.95	235.96	225.41	188.11	188.54	223.67	164.62	199.35	215.74	157.05	147.96	210.12	185.12	202.67	161.09	219.19	183.22	161.23	172.24	257.13	181.2	163.93	195.95	159.46	142.38	165.18	185.33	200.96	165.83	207.9	197.34	151.91	134.24	181.2	154.84	180.07	203.29	174.6	162.75	124.46	180.62	161.35	177.79	220.71	165.68
1001	ENSG00000138613.9	<APH1B>	6.05	5.69	4.92	3.85	5.32	6.22	3.31	5.73	7.35	4.53	4.38	2.44	4.63	6.13	4.39	5.91	3.01	2.78	2.58	5.62	1.71	9.23	5.92	4.17	4.68	1.21	2.46	2.49	3.5	5.78	2.98	3.69	6.3	2.33	1.53	1.98	4.18	4.74	5.27	2.1	4.23	3.58	5.35	4.77	4.06	4.29	5.97
1002	ENSG00000166181.8	<API5>	14.04	12.08	14.62	11.04	19.96	15	7.74	13.08	13.93	14.1	10.33	17.51	13.04	19.06	10.73	13.88	13.89	14.65	17.26	13.57	8.98	17.51	13.68	11.35	16.09	9.05	7.89	16.83	9.44	19.33	12.02	12.59	13.94	14.1	12.44	15.83	14.14	14.15	16.8	19.09	10.24	12.17	16.12	16.44	19.14	14.23	10.68
1003	ENSG00000149089.8	<APIP>	61.48	61.05	51.2	32.05	72.38	52.15	56.27	42.05	70.61	67.25	32.88	88.23	36.79	44.53	61.62	30.48	35.96	46.29	39.61	50.79	72.78	41.88	43.33	73.74	43.84	55.53	70.34	38.93	61.33	46.61	42.31	65.71	57.15	35.94	45.08	40.64	48.47	61.65	30.33	50.33	67.67	74.2	66.3	59.29	54.95	51.08	33.56
1004	ENSG00000175279.17	<APITD1>	19.34	18.11	15.25	15.13	13.99	20.79	17.04	19.07	15.78	15.69	10.4	15.64	17.85	21.93	15.42	8.03	21.07	16.79	11.56	12.63	16.9	8.49	14.3	23.87	15.44	18.69	11.7	12.92	20.13	20.86	15.55	17.38	18.62	17.76	15.98	16.79	13.07	12.91	25.02	15.83	11.78	18.32	19.08	16.96	15	21.63	12.92
1005	ENSG00000251503.3	<APITD1-CORT>	3.34	2.48	0	0.9	2.68	1.47	0.45	2.2	1.2	1.75	1.96	1.73	0.53	0.44	3.54	0.55	2.29	3.41	1.36	3.74	1.38	0.92	1.47	0.78	1.73	0.95	1.97	0.75	1.47	3	1.31	1.68	0.95	3.25	1.41	1.62	2.08	0.82	1.25	3.71	2.27	2.26	1.52	1.26	1.42	1.29	0.82
1006	ENSG00000169621.5	<APLF>	1.35	1.15	2.57	1.19	1.28	1.9	3.28	1.07	2.11	1.55	1.16	2	3.96	1.28	1.41	1.38	0.96	0.77	1.23	2.02	1.84	0.8	1.56	1.65	2.16	3.28	2.16	1.88	2.39	0.75	1.65	0.9	2.88	2.09	1.58	0.91	2.31	3.21	0.87	1.34	2.35	2.46	3.15	0.69	1.49	1.05	1.47
1007	ENSG00000171388.9	<APLN>	0.16	0.34	0.72	0.2	2.39	2.97	2.7	0	1.46	0.5	0.51	1.13	0.55	1.65	0	0.9	1.26	0.41	0.49	4.5	0.16	1.43	0.6	0.71	1.59	0.9	1.09	1.02	1.7	0.49	1.71	0.29	1	0.28	0.22	2.85	0.96	4.65	0.37	1.6	3.32	0.67	1.43	0.59	0	0.96	0.88
1008	ENSG00000134817.9	<APLNR>	11.94	4.9	12.43	17.59	4.68	34.37	27.21	3.71	19.82	13.51	4.36	6.91	1.45	14.92	1.98	4.06	0.4	1.29	4.01	38.98	6.52	8.35	1.83	4.08	8.43	7.92	5.81	12.15	19.21	8.38	1.69	4.79	4.71	1.23	6.82	21.99	16.59	15.47	3.5	2.15	46.42	2.05	26.26	1.43	2.02	4.23	8.52
1009	ENSG00000105290.7	<APLP1>	37.11	17.86	28.32	18.31	55.04	12.44	44.41	21.53	24.64	25.65	24.78	58.95	45.98	70.79	30.84	29.78	24.54	21.4	29.02	51.56	9.78	21.95	39.41	22.82	31.1	46.04	37.94	27.42	31.07	39.44	6.96	45.16	30.94	34.28	34.15	36.95	35.77	18.35	19.73	24.34	46.8	44.28	18.12	46.12	30.03	26.23	14.74
1010	ENSG00000084234.12	<APLP2>	259	194.7	202.79	253.2	269.24	257.3	287.56	254.87	242.3	207.77	188.35	257.93	175.29	346.13	168.48	239.55	230.22	246.85	214.55	231.8	172.71	317.3	238.41	212.27	272.95	249.71	170.55	178.4	193.45	245.9	224.95	236.38	242.84	191.04	208.65	272.97	202.55	197.65	213.41	212.23	176.96	208.7	201.13	242.6	175.15	224.65	217.64
1011	ENSG00000101474.7	<APMAP>	24.35	37.32	37.18	46.63	32.63	43.26	33.99	35.79	23.11	38.7	43.9	21.24	27.81	35.47	40.83	36.94	32.42	23.83	39.48	20.71	44.13	40.11	31.84	52.54	44.65	33.15	28.19	23.17	32.86	30.55	52.98	26.38	22.74	26.4	17.24	23.35	25.06	45.11	41.09	30.32	39.81	29.72	30.79	27.81	26.43	43.44	46.39
1012	ENSG00000118137.5	<APOA1>	28.01	11.77	13.13	26.58	17.64	16.61	18.17	11.35	21.39	14.19	13.56	19.7	19.57	44.62	19.1	20.77	12.48	19.13	35.74	22.44	4.32	9.82	14.52	18.83	35.53	32.4	20	16.86	13.65	6.13	8.38	16.29	24.24	6.22	10.54	29.24	5.55	22.18	35.83	11.95	12.05	16.49	0.78	29.2	7.05	21.02	8.38
1013	ENSG00000163382.7	<APOA1BP>	133.59	180.96	117.4	131.73	128.46	137.86	125.27	151.69	132.73	114.19	162.13	103.41	94.84	101.37	122.77	129.51	128.65	153.46	114.97	105.93	166.17	95.68	118.16	140.21	110.87	148.7	131.18	118.68	120.21	137.02	222.68	134.5	131.62	145.19	93.68	147.94	94.28	119.29	111.12	166.09	110.26	121.86	110.85	191.39	137.83	131.97	111.96
1014	ENSG00000158874.7	<APOA2>	2.33	0.2	3.68	0.92	0.3	0	0.22	0.46	0.12	0.22	0.44	0.28	0.93	0.68	0.41	0.28	0	1.4	1.56	0	0	0.6	0	0.74	0.14	0	1.26	0.14	0.41	0.44	0.47	0	0.16	0	0.7	0.35	0.1	0.09	0	4.3	0	3.72	0.19	0	1.99	0	0
1015	ENSG00000110244.5	<APOA4>	0	0	0	0	0	0	0	0	0	0	0	0	0	0	0	0	0	0	0	0	0	0	0	0	0	0	0	0	0	0	0	0	0	0	0	0	0	0	0	0	0	0	0	0	0	0	0
1016	ENSG00000110243.7	<APOA5>	0	0	0	0	0.09	0	0	0	0	0.32	0	0	0	0.37	0	0	0	0.29	0	0	0	0	0	0	0.18	0	0	0	0	0	0	0	0	0	0	0	0	0	0	0	0	0	0	0	0	0	0
1017	ENSG00000084674.9	<APOB>	0	0.04	0	0.04	0	0	0	0	0	0	0	0	0	0	0	0	0	0	0	0	0	0	0	0	0	0	0	0	0	0	0	0	0	0	0	0	0	0	0	0	0	0	0	0	0.04	0	0
1018	ENSG00000111701.6	<APOBEC1>	0	0	0	0	0	0.2	0	0	0	0	0	0	0	0	0	0	0	0	0	0	0	0	0	0	0	0	0	0	0	0	0	0	0	0	0	0	0	0	0	0	0	0	0	0	0	0	0
1019	ENSG00000124701.5	<APOBEC2>	0	0	0	0	0	0	0	0	0	0	0	0	0	0	0	0	0	0	0	0	0	0	0	0	0	0	0	0	0	0	0	0	0	0	0	0	0	0	0	0	0	0	0	0	0	0	0
1020	ENSG00000128383.8	<APOBEC3A>	0	0	1.33	0.49	0	0	0	1.07	0.49	0	0.15	0	1.58	0.37	1.29	0	0	0	1.43	0	0	0.16	0.57	0.18	0	0.79	0.58	0	0.52	0.47	0.51	1.07	0	0	0	0.18	0	0.42	0	0.43	1.4	2.43	1.15	0.15	0	0.48	0.66
1021	ENSG00000179750.11	<APOBEC3B>	0.4	0.27	0.61	0.09	0	0.27	0.16	0	0.16	0.18	0.36	0.18	0.57	2.2	0	0.02	0.22	0.02	0.51	0.47	0.04	0	0	0.24	0.32	0.66	0.26	0.42	0.52	0	0.32	0	0.27	0.21	0.36	0.89	0	0.78	0	0.26	0	0	0.8	0	0.32	0.24	0.13
1022	ENSG00000244509.3	<APOBEC3C>	1.74	2.05	4.32	6.08	3.56	4.23	3.82	0	2.37	1.89	1.03	2.23	3.27	1.63	0.99	0.96	3.66	0.46	2.56	3.37	1.35	0.78	2.59	0	3.35	1.48	0	4.22	1.27	1.16	0.38	1.05	0	2.06	3.88	3.69	0.94	1.03	1.81	3.49	0.82	2.15	3.14	0	2.59	0	2.77
1023	ENSG00000243811.3	<APOBEC3D>	0	0	0	0	0.62	0.95	0.85	1.51	2.73	1.57	0	1.48	1.94	1.21	0	0	0.69	1.05	0	0.59	0.51	0.88	0.8	0.76	1.41	2.29	2.21	1.37	1.7	0.8	1.26	0	1.02	0	0.41	1.24	1.28	0	0	0.43	0	1.03	1.34	2.04	0	0	1.32
1024	ENSG00000128394.12	<APOBEC3F>	3.38	1.94	8.21	3.04	2.97	5.79	4.86	1.8	5.84	2.73	2.96	4.13	4.9	1.93	2.37	1.55	1.91	3.61	0.34	2.61	2.08	2.14	2.82	1.61	2.54	6.54	3.5	4.96	4.11	2.56	3.79	2.84	1.3	2.02	5.83	4.71	3.15	3.92	2.66	2.49	7.57	8.4	2.61	3.66	4.96	1.72	1.06
1025	ENSG00000239713.3	<APOBEC3G>	23.63	8.61	18.48	7.74	12.81	9.1	17.07	5.44	17.64	5.51	12.44	22.74	12.82	22.29	6.74	7.03	9.51	9.6	17.17	9.03	7.39	5.87	6.61	7.47	8.54	10.46	7.24	13.01	20.76	6.55	7.61	8.85	6.63	19.3	5.31	15.98	4.79	11.64	6.58	8.31	10.62	27.49	15.65	16.12	9.54	8.76	6.32
1026	ENSG00000100298.11	<APOBEC3H>	1.15	0.95	2.01	0.27	5.44	1	0.59	2.11	1.18	1.35	0	1.7	1.72	1.54	0.64	2.16	0.58	0.5	1.16	0	0.86	3.43	1.21	1.67	0.2	1.52	0.21	0.93	2.05	0	0.11	1.12	0	0.4	0.58	0.75	0	4.86	0.35	0.58	1.6	1.91	1.62	0.28	2.2	1.65	0.02
1027	ENSG00000173627.6	<APOBEC4>	0	0	0	0	0	0	0	0	0	0	0.36	0	0	0	0	0	0	0	0	0	0	0	0	0	0	0	0	0	0	0	0	0	0	0	0	0	0	0	0	0	0	0	0	0	0	0	0
1028	ENSG00000184730.6	<APOBR>	2.62	2.97	1.37	6.97	2.13	2.94	3.22	5.27	2.2	2.81	6.08	1.27	1.45	1.67	3.73	1.55	3.84	4.61	4.01	0.66	3.21	3.63	0.92	3.59	2.47	1.98	2.13	1.53	3.46	4.82	3.45	2.65	2.79	4.04	1.82	1.62	2.22	3.24	1.9	4.84	2.47	0.71	2.86	3.29	6.35	5.66	2.55
1029	ENSG00000130208.5	<APOC1>	9.3	3.73	7.88	23.99	8.29	3.21	10	2.66	3.04	35.87	27.27	1.45	2.17	7.6	25.3	4.93	9.44	14.34	17.95	7.6	14.79	2.81	8.37	4.33	18.38	13.3	21.41	8.27	19.21	8.26	29.4	13.14	3.47	11.65	7.39	13.34	12.2	3.33	18.75	8.14	5.25	14.63	26.54	15.75	10.9	18.21	16.37
1030	ENSG00000234906.4	<APOC2>	3.16	1.76	0.54	1.01	1.46	0	1.31	1.52	0.32	0.36	5.16	3.53	2.17	2.24	0.67	1.02	2.44	1.81	4.39	0.38	0	0	0.14	1.29	0.45	0.9	1.28	1.05	1.13	1.22	3.23	0.74	1.35	3.35	0.14	0	0.17	0.23	1.09	0	0	3.8	0.37	2.1	1.54	2.94	0.66
1031	ENSG00000110245.7	<APOC3>	0	2.34	0	0	0	0	0.18	0	0	0	0.13	0	0	0.7	0	0	0	0.85	0	0	0	0	0	0	0.85	0	0	1.05	0	0	0	0	0	2.94	0.79	0	0	0	0.02	1.02	0.29	1.88	2.44	0	0	0	0.2
1032	ENSG00000267467.2	<APOC4>	0	0.18	0	0	0	0	0	0	0.21	0.61	0	0	0	0	0	0	0	0	0	0	0	0.23	0.41	0.83	0.09	0	1.37	0	0.72	0.36	0.43	0	0.27	0	0	0	0	0.16	0	0.09	0.19	0.02	0	0	0	0	0.2
1033	ENSG00000224916.4	<APOC4-APOC2>	1.38	1.3	0.51	0	0	0	0	0.46	1.37	0.65	0	0	1.67	0	0	0	0	0	1.91	0	1.24	0.64	1.14	0.6	1.6	0.64	0	0.89	3.01	2.09	0.84	0.94	0.64	1.83	0	1.49	1.82	0.56	0	0	0	0	0.84	0.39	0	1.31	0.29
1034	ENSG00000189058.4	<APOD>	1633.71	1111.75	5088.17	3817.19	3078.66	2204.76	5205.2	5351.25	2117.32	2847.09	502.86	1707.69	812.69	1219.81	1752.93	2546.33	4563.88	621.69	686.74	1359.39	532.96	6742.36	4298.51	1796.26	2907.38	932.22	625.43	1128.23	1083.81	5110.59	234.38	3919.82	4443.7	2452.9	3799.3	5881.69	999.08	5277.42	4568.57	460.42	269.94	467.71	259.71	662.48	2529.81	680.15	3248.79
1035	ENSG00000130203.5	<APOE>	3.86	14.71	14.79	41.8	19.98	19.68	17.4	9.92	17.55	19.11	18.9	17.09	21.15	18.29	35.93	14.29	4.02	17.6	21.46	3.77	8.85	19.79	19.54	21.85	24.94	27.07	26.99	14.18	23.52	24.9	16.03	21.95	18.09	12.2	11.69	10.45	9.59	14.72	62.81	15.96	11.55	8.83	22.43	5.54	10.33	44.46	61.96
1036	ENSG00000175336.8	<APOF>	0	0.07	0	0.13	0	0	0.07	0	0	0.14	0	0.09	0	0	0	0.09	0.11	0.07	0.09	0	0	0	0	0	0.05	0	0.26	0	0	0	0	0	0	0.17	0.14	0	0	0.05	0	0	0	0.09	0	0.06	0	0	0
1037	ENSG00000091583.6	<APOH>	0.75	0.4	0	0.13	0.23	0	0.31	0	0	0	0	0	0.19	0.15	0	0	0	0.24	0	0	0	0.04	0.3	0	0	0.22	0	0.21	0.2	0	0	0	0	0	0.36	0	0	0	0	0	0	0	0	0.41	0	0	0.16
1038	ENSG00000100342.16	<APOL1>	26.02	26.05	42.03	25.95	28.39	31.86	38	31.56	36.71	33.75	54.13	62.55	35.28	28.02	27.94	49.7	18.93	20.95	32.62	36.46	22.73	21.98	20.56	30.47	18.45	37.72	34.35	33.89	61.51	30.21	66.03	32.39	23.96	21.27	38.58	42.35	21.22	36.1	19.27	23.58	50.56	30.27	51.8	22.48	23.33	20.72	40.04
1039	ENSG00000128335.9	<APOL2>	101.39	89.16	90.86	101.39	123	96.09	90.47	112.51	89.19	115.18	114.22	85.1	138.74	97.99	103.82	136.26	93.58	103.05	103.59	122.21	104.54	105.14	81.87	94.94	71.41	98.87	131.92	100.52	98.99	108.09	90.78	97.05	89.03	73.54	93.08	112.61	89.78	87.58	87.41	89.2	123.98	114.71	116.74	90.67	100.47	83.8	155.54
1040	ENSG00000128284.15	<APOL3>	42.21	86.6	58.97	86.51	79.65	81.07	58.73	123.86	65.99	100.68	75.67	39.05	61.38	87.39	95.84	72.13	73.25	97.75	82.01	57.01	89.23	82.82	65.06	128.21	68.81	71.18	81.86	53.68	53.87	118.26	96.05	89.14	102.52	56.47	57.54	56.83	77.97	88.59	50.34	108.57	84.85	53.94	67.26	96.44	92.88	88.12	120.01
1041	ENSG00000100336.13	<APOL4>	10.76	14.48	15.72	32.93	12.37	13.17	17.06	52.95	15.18	67.52	24.54	9.19	18.65	9.87	41.96	57.45	13.68	14.54	23.89	5.97	77.73	18.78	7.44	12.55	6.09	6.29	27.64	29.63	10.6	21.55	20.7	17.68	66.25	23.71	8.08	32.59	20.82	11.41	18.59	23.21	9.27	27.15	17.37	11.76	11.36	34.85	49.32
1042	ENSG00000128313.2	<APOL5>	0	0	0	0	0	0	0	0	0	0	0	0	0	0	0	0	0	0	0	0	0	0	0	0	0	0	0	0	0	0	0	0	0	0	0	0	0	0	0	0	0	0	0	0	0	0	0
1043	ENSG00000221963.5	<APOL6>	0	0	0	0	0	0	0	0	0	0	0	0	0	0	0	0	0	0	0	0	0	0	0	0	0	0	0	0	0	0	0	0	0	0	0	0	0	0	0	0	0	0	0	0	0	0	0
1044	ENSG00000178878.8	<APOLD1>	45.35	88.37	25.54	75.08	31.67	102.74	66.26	71.06	22.69	51.43	73.98	33.45	26.62	167.86	108.75	133.9	64.89	74.99	123.5	137.49	67.21	66.55	107.97	83.66	206.21	42.66	69.36	37.92	59.83	65.81	109.49	140.46	170.99	43.68	42.93	88.35	64.09	81.48	81.42	99.89	44.51	22.26	71.39	116.6	73.31	88.85	268.79
1045	ENSG00000204444.6	<APOM>	8.33	9.02	4.66	11.94	12.23	12.63	7.49	12.33	9.85	10.09	13.65	4.97	5.89	7.6	19.03	5.96	8.88	13.56	7.39	5.73	6.92	19.49	8.9	6.6	9.78	5.08	4.27	9.13	8.61	7.93	6.36	9.66	5.11	6.98	2.49	10.67	6.53	12.7	9.96	7.79	7.09	3.01	8.54	10.98	5.41	13.35	6.41
1046	ENSG00000184831.9	<APOO>	61.44	43.16	39.42	29.57	37.37	21.52	43.5	25.9	39.4	37.08	38.07	63.22	30.1	36.09	36.21	44.03	47.39	44.27	50.41	53.48	37.57	26.62	45.84	40.77	28.45	44.88	35.48	37.51	36.76	52.17	48.44	36.11	33.02	40.38	46.35	43.51	35.73	36.52	46.6	59.8	31.49	30.85	48.32	47.42	37.24	37.73	28.15
1047	ENSG00000155008.9	<APOOL>	0	0	0	0	0	0	0	0	0	0	0	0	0	0	0	0	0	0	0	0	0	0	0	0	0	0	0	0	0	0	0	0	0	0	0	0	0	0	0	0	0	0	0	0	0	0	0
1048	ENSG00000256053.3	<APOPT1>	89.45	69.51	91.86	65.11	62.86	79.28	76.26	68.19	80.02	83.93	53.06	93.16	105.42	82.77	74.06	58.93	83.31	61.09	86.55	99.91	87.46	42.62	80.2	86.75	88.35	122.97	80.19	99.43	84.92	65.16	88.53	83.19	78.45	75.54	120.01	84.2	87.21	71.06	87	89.37	70.45	95.17	90.66	64.72	61.56	68.94	89.2
1049	ENSG00000142192.16	<APP>	411.67	233.41	301.05	340.24	516.33	252.66	378.53	318.62	325.04	276.1	242.23	559.01	251.51	366.24	215.89	276.16	346.66	343.05	385.77	255.36	164.52	367.79	404.33	242.14	464.51	336.95	207.95	209.52	208.14	403.85	204.98	390.7	353.58	200.48	291.93	523.33	222.11	198.52	336.25	324.61	155.69	340.05	217.07	324.22	210.03	369.25	231.77
1050	ENSG00000062725.5	<APPBP2>	5.64	6.07	16.38	8.25	19.7	8.31	5.53	8.67	4.63	12.25	2.09	15.96	7	19.06	5.04	8.75	7.11	6.52	15.85	8.13	4.63	7.45	5.26	6.47	9.96	1.39	5.85	8.55	4.93	8.15	0.53	6.54	3.36	9.83	7.99	4.05	14.35	5.37	11.38	4.01	10.5	2.6	7.39	2.75	7.92	5.08	17.36
1051	ENSG00000157500.6	<APPL1>	3.23	2.05	2.57	1.59	2.11	3.05	2.09	4.59	0.84	2.73	3.52	5.5	1.24	2.79	3.18	2.95	3.05	4.02	2.34	1.99	1.71	7.83	2.68	3.7	2.23	0.77	2.2	2.72	2.57	2.15	1.09	1.64	2.99	2.23	2.27	3.93	2.41	4.08	2.77	2.34	6.42	0.65	3.5	3.23	3.94	2.92	4.25
1052	ENSG00000136044.7	<APPL2>	37.29	43.73	31.91	50.79	50.01	48.51	34.13	29.34	45.32	33.12	42.99	47.64	50.08	78.03	44.19	35.43	47.38	30.46	45.56	42.46	34.33	53.29	44.74	38.72	45.08	29.45	38.32	36.18	32.16	45.08	15.9	28.59	53.62	37.11	53.93	35.42	40.66	41.44	44.2	38.94	49.34	57.62	37.46	40.2	58.99	34.14	39.59
1053	ENSG00000198931.6	<APRT>	116.83	190.16	96.92	152.25	137.07	80.57	94.97	175.21	83.93	113.23	209.39	59.97	46.26	96.51	140.86	151.4	141.24	140.87	122.56	86.6	213.22	160.46	118.31	131.25	113.12	150.4	114.18	75.05	95.38	129.62	327.86	152.35	109.59	126.65	47.86	97.62	100.77	158.65	98.92	165.42	98.26	40.75	102.16	164.67	134.09	179.85	152.48
1054	ENSG00000137074.14	<APTX>	59.93	56.57	53.28	55.51	68.67	55.95	61.54	52.3	65.32	59.84	57.02	52.6	59.66	56.22	55.82	57.51	56.87	56.76	57.45	54.97	61.16	68.74	45.8	53.96	49.23	65.83	55.89	61.81	49.49	60.94	57.16	50.65	57.75	63.34	53.83	51.85	56.69	64.99	50.34	52.95	67.13	55.63	60.1	57.36	59.84	49.16	51.96
1055	ENSG00000240583.6	<AQP1>	10.83	24.58	21.2	2.08	6.16	12.45	9.65	3.91	9.85	3.08	7.72	10.11	15.94	0	5.73	7.48	4.62	3.02	5.17	11.47	14.92	2.79	1.94	4.77	4.16	22.17	14.67	34.29	30.35	3.58	33.81	3.3	2.5	2.47	25.81	6.38	7.26	129.83	1.75	10.67	88.26	36.67	15.11	6.33	14.55	4.94	3.63
1056	ENSG00000143595.8	<AQP10>	0	0	0.33	0	0	0	0	0.04	0.12	0.18	0	0	0.43	0	0	0.06	0	0.04	0	0	0	0.07	0.02	0	0	0	0	0.14	0	0.13	0	0	0	0	0	0	0.12	0	0	0	0	0	0.26	0	0	0.13	0
1057	ENSG00000178301.3	<AQP11>	0	0	0.56	0	0	0	0	0	0	0	0	0	0	0	0	0.04	0	0	1.07	1.37	1.84	0	0.71	0	0	0	0	0.82	0	0	0	0	0	0.98	0	0	0	0	0	0.43	1.11	0	0	0.82	0.51	0	0
1058	ENSG00000184945.9	<AQP12A>	0.23	0.29	0.51	0	0	0	0.27	0	0.04	0	0	0.39	0.55	0	0.14	0.41	0	0	0	0.26	0	0.09	0	0	0	0	0	0	0.23	0	0	0	0.18	0.38	0	0	0.54	0.4	0.15	0.35	0.78	0	0.1	0	0	0.79	0
1059	ENSG00000185176.8	<AQP12B>	0.34	0.23	0.14	0	0	0	0.04	0.04	0.19	0	0	0.69	0.03	0.04	0.53	0	0.09	0	0	0	0	0.19	0	0	0	0	0	0.25	0	0.04	0	0	0.26	0.03	0.21	0	1.17	0.38	0	0.22	0	0.03	0.14	0.11	0	0.09	0
1060	ENSG00000167580.3	<AQP2>	0	0.02	0	0	0	0	0	0	0	0	0	0	0	0	0	0	0	0	0	0	0	0	0	0	0	0	0	0	0	0	0	0	0	0	0	0	0.02	0	0	0	0.43	0	0.49	0	0	0	0
1061	ENSG00000165272.10	<AQP3>	1.78	1.71	0.89	0.31	1.94	2.06	0.86	1.65	2.59	7.75	0.84	0.92	0.98	0.62	9.05	1.96	3.77	1.6	0.45	1.21	1.6	0.67	0.59	7.76	4.27	1.8	10.36	1.86	2.71	4.16	2.87	2.12	6.17	2.56	2.73	1.11	0.68	0.3	2.67	1.17	3.29	0.95	1.88	3.47	0.94	4.1	7.88
1062	ENSG00000171885.9	<AQP4>	0	0.07	0	0.18	0.02	0.91	0.04	0	0	0	0.29	0	0.38	0	0	0.92	0.11	0	0	0	0.18	0.07	0	0.36	0.14	0.53	0	0.21	0.13	0	0	0.28	0	0.1	0	0	0	0	0	0.56	0	0.07	0	0.06	0.21	0.48	0
1063	ENSG00000161798.6	<AQP5>	0	0	0	0.16	0.3	0	0	0	0.32	0	0	0	0	0	0.14	0	0.11	0	0	0.19	0	0.11	0	0	0	0	0	0.16	0	0	0	0	0	0	0	0	0	0	0	0.24	0.44	0	0	0.17	0	0	0
1064	ENSG00000086159.8	<AQP6>	0.93	0.49	0.18	0.36	0.28	1.18	0.27	0.28	0.56	0.25	1.2	0.09	0.38	0.42	0.92	1.11	0.61	1.07	0.4	0.35	0.16	0.37	3.54	0.82	0.54	0.27	0.83	0.16	0.32	0.15	0.34	0.41	0.44	0.92	0.82	0.18	0.35	0.14	0.76	0.59	1.64	0.1	0.58	0.45	0.6	0.94	0.81
1065	ENSG00000165269.8	<AQP7>	2.51	4.68	20.6	4.61	3.08	55.64	28.64	21.27	24.29	12.2	6.44	4.31	4.53	41.98	11.99	1.46	17.14	7.43	10.26	12.29	26.48	23.49	4.62	76.35	52.92	9.18	10.98	3.82	15	22.02	5.76	21.25	18.84	9.09	10.14	27.81	51.67	80.68	18.05	25.64	73.96	4.7	22.02	8.88	12.07	8.91	105.49
1066	ENSG00000103375.6	<AQP8>	2.62	1.31	1.05	0.98	1.25	0.7	0.94	1.19	0.58	1.06	2.92	1.27	1	1.67	3.32	1.18	0.47	2.14	0.22	3.27	1.58	2.58	3.22	1.38	1.59	0.53	0.53	1.28	0	1.18	1.8	1.29	1.31	0	0.79	0.91	0	1.43	0.89	0.85	1.64	0.86	1.05	1.04	1.03	2.07	0.95
1067	ENSG00000103569.5	<AQP9>	0.16	0	0.16	0.16	0.32	0.14	0.31	0.72	0.04	0.67	0	0.32	0	0.15	0.32	0	0	0	0	0.09	0	0.14	0	0	0.25	0.11	0	0	0.11	0.16	1.52	0	0	1.05	0.31	0.13	0	0.63	0.04	0.37	0.87	0.6	0.12	0.19	0	0.22	0
1068	ENSG00000172901.15	<AQPEP>	2.19	6.28	4.25	2.53	1.46	20.75	2.32	2.81	9.15	0.83	3.03	2.19	3.17	6.99	2.25	1.16	3.97	4.42	1.8	3.88	10.98	3.09	0.69	24.14	21.69	3.83	5.48	1.28	3.61	2.53	2.25	3.89	3.41	4.94	4.16	4.13	22.64	16.57	4	2.17	9.8	3.17	6.93	1.99	2.84	0.7	32.68
1069	ENSG00000021776.6	<AQR>	12.1	28.54	27.36	22.29	20.79	23.89	18.05	18.48	28.37	21.01	27.54	20.3	24.83	23.23	31.58	27.34	22.1	18.21	26.32	27.93	22.07	26.9	18.37	26.41	23.5	18.34	21.67	18.69	25.28	22.46	31.62	19.46	19.8	21.53	22.65	20.14	28.92	35.96	13.15	22.38	39.23	18.44	24.45	22.92	20.76	21.04	21.83
1070	ENSG00000169083.11	<AR>	0.11	0.29	0.16	0.2	0.23	0.04	0.34	0	0	0.09	0.67	0	0	0.24	0.02	0.17	0.18	0.2	0.16	0.12	0.46	0.46	0.09	0.16	0.02	0.09	0.18	0.18	0.48	0	0.17	0.13	0.18	0.17	0.1	0.05	0.3	0.17	0.02	0.33	0.6	0.19	0.14	0.2	0.16	0.3	0.4
1071	ENSG00000078061.8	<ARAF>	114.05	144.88	122.62	112.5	129.61	103.44	132.04	152.56	138.61	117.12	134.68	126.48	107.9	117.15	133.49	132.44	122.34	124.06	118.08	124.84	113.39	130.1	125.91	127.37	120.28	125.86	117.65	135	128.41	127.22	176.22	137.75	134.08	128.69	123.42	129.06	99.49	117.88	120.14	131.88	123.13	128.54	134.66	161.26	140.07	124.56	122.57
1072	ENSG00000186635.10	<ARAP1>	163.53	76.03	214.32	84.39	92.32	201.85	193.44	77.01	220.44	131.44	85.4	205.82	214.35	128.21	116.79	61.55	117.43	101.95	101.96	205.91	86.84	86.82	91.37	94.76	96.85	223.69	186.89	228.75	232.68	85	87.99	110.82	85.36	171.14	300.49	217.99	170.62	132.36	76.62	98.65	222.63	244.01	236.71	86.64	128.1	95.06	104.34
1073	ENSG00000047365.7	<ARAP2>	5.33	3.24	6.41	5.37	6.72	5.59	4.03	6.6	6.89	5.27	9.15	7.56	12.84	8.44	8.58	6.18	6.22	5.66	12.52	7.92	3.37	5.23	9.35	6.89	7.03	4.67	5.48	5.54	8.11	4.04	3.83	3.34	8.83	13.87	7.17	2.82	9.5	5.21	3.56	6.4	9	14.58	6.19	6.04	9.24	9.04	4.91
1074	ENSG00000120318.11	<ARAP3>	11.8	15.56	15.75	15.96	33.69	22.97	23.16	26.11	26.1	17.16	23.58	17.6	27	20.97	19.7	21.67	25.02	11.35	22.24	26.37	13.2	25.13	28.62	22.94	23.33	24.28	28.93	21.33	23.95	16.11	82.83	24.72	17.19	39.15	30.73	13.7	27.16	25.37	8.41	17.98	31.12	58	25.02	17.89	19.2	13.22	20.16
1075	ENSG00000198576.2	<ARC>	0	0.74	0	2.66	0.86	0	2.2	1.16	0	0.14	0	2.12	0.71	0.77	1.15	0	1.05	0	0	0	0	1.36	0	0	0	0	1.3	0	0	0	4.41	0	0	0	1.48	0.53	1.87	1.06	1.33	0	0.78	0	0	0	0	0.5	0
1076	ENSG00000095139.9	<ARCN1>	76.27	111.21	97.24	74.57	97.67	93.17	86.85	102.46	84.42	87.42	132.69	84.53	86.34	83.1	95.42	109.49	83.75	94.74	89.05	87.66	113.52	84.96	74.32	97.3	88.06	108.95	74.73	94.61	100.35	75.39	151.11	85.56	101.54	97.07	88.03	90.42	82.19	94.7	72.6	102.67	84.6	87.06	102.89	105.51	92.51	98.75	93.82
1077	ENSG00000109321.6	<AREG>	0.97	9.9	2.21	18.58	1.48	2.89	7.02	33.34	0.86	11.42	58.89	3.52	8.31	9.63	14.94	41.74	8.79	30.33	50.04	6.66	4.66	1.66	0	11.23	3.14	1.98	13.56	3.68	17.33	5.29	26.5	12.07	8.34	0.55	2.53	13.87	9.55	5.98	1.81	9.13	1.52	2.51	1.71	14.69	5.97	8.97	49.01
1078	ENSG00000205595.3	<AREGB>	0	0.38	0.3	0.69	0.19	0	0.16	0.5	0	0.63	2.81	0	0.1	1.5	0.53	1.13	0.38	1.75	2.65	0	0.2	0.07	0	0.49	0.14	0	0.67	0.12	0.18	0.29	0.32	0.48	0	0.55	0.12	0	0.28	0.58	0.42	0.37	0	0.43	0	0.93	1.79	0.85	1.58
1079	ENSG00000119682.12	<AREL1>	18.35	15.16	17.78	13.28	19.1	12.29	14.91	16.02	16.41	17.31	17.21	10.83	22.91	14.4	15.21	19.5	13.3	12.05	16.64	14.34	17.19	15.74	17.11	17.18	15.89	15.1	14.3	14.46	13.19	14.44	25.77	13.86	7.34	22.43	11.46	9.58	18.72	16.38	8.85	18.81	15.06	16.39	15.07	17.42	25.44	14.7	14.15
1080	ENSG00000143761.9	<ARF1>	46.92	56.08	38.95	152.39	65.96	71.39	124.26	76.3	89.34	47.01	41.05	37.39	23.25	42.16	35.97	64.41	70.67	95.02	29.7	34.43	38.63	110.25	57.79	47.72	77.37	26.43	22.23	39.09	36.97	90.22	61.45	20.98	18.6	15.05	34.44	111.38	58.44	34.64	98.23	27.12	16.33	13.02	33.02	20.01	19.87	47.55	21.83
1081	ENSG00000134287.5	<ARF3>	22.98	39.97	13.55	32.52	34.64	16.06	22.75	25.44	16.32	26.61	16.47	33.06	10.15	10.95	8.79	23.89	14.7	38.28	11.74	10.17	3.22	11.87	14.2	2.07	0.85	17.28	12.91	25.23	26.98	41.73	24.58	17.82	23.96	13.08	21.72	35.19	23.01	26.38	47.69	24.29	24.13	19.71	12.51	28.2	15.12	19.54	26.1
1082	ENSG00000168374.6	<ARF4>	10.86	12.93	15.07	8.31	26.7	12.54	16.7	19.18	19.65	16.21	19.19	16.82	15.02	13.08	14.62	25.05	11.31	11.94	17.9	19.12	16.97	28.63	11.69	17.36	12.58	13.32	15.79	12.03	11.09	14.11	20.23	6.78	12.23	14.46	9.68	14.83	26.42	15.91	15.55	20.28	4.64	23.67	13.66	16.09	11.59	17.65	8.21
1083	ENSG00000004059.6	<ARF5>	100.3	144.63	80.47	109.96	120.08	132.43	99.55	89.16	130.9	116.63	121.36	91.95	136.86	98.05	128.48	86.34	92.48	121.65	91.68	127.56	103.81	111.21	155.99	109.34	114.2	119.34	114.63	86.46	118.22	117.82	107.23	103.39	107.27	102.82	125.27	150.63	169.32	192.07	144.02	105.23	150.6	117.21	125.25	134.14	103.11	78.75	91.84
1084	ENSG00000165527.5	<ARF6>	0	0	0	0	0	0	0	0	0	0	0	0	0	0	0	0	0	0	0	0	0	0	0	0	0	0	0	0	0	0	0	0	0	0	0	0	0	0	0	0	0	0	0	0	0	0	0
1085	ENSG00000101199.8	<ARFGAP1>	212.39	181.95	224.54	197.87	306.72	245.11	184.92	187.59	250.99	223.05	236.98	205.94	265.79	264.9	290.14	264.4	190.01	184.93	233.86	265.83	159.62	299.7	181.45	176.47	194.41	182.82	214	213.94	204.7	160.68	339.64	192.49	169.6	286.58	177.76	207.07	194.89	180.66	109.87	194.23	290.87	190.88	234.1	190.29	215.7	167.69	204.6
1086	ENSG00000149182.10	<ARFGAP2>	184.92	197.47	193.68	198.54	198.89	172.16	177.01	181.16	211.35	184.94	219.39	170.34	185.07	175.26	198.31	160.8	195.66	203.01	204.44	193.97	176.77	211.77	208.38	183.79	194.41	175.4	195.42	176.79	189.74	203.53	162.66	192.12	205.26	220.18	188.47	173.59	185.56	165.62	198.75	206.44	183.59	194.58	191.25	181.39	232.03	199.12	197.42
1087	ENSG00000242247.6	<ARFGAP3>	3.25	4.25	0.98	7.04	5.77	3.49	1.08	10.69	6.31	3	1.8	1.29	1.5	0.57	5.89	12.9	0.78	3.93	10.73	3.81	2.53	10.24	0.6	1.23	6.34	0.81	1.65	1.56	3.21	5.27	1.48	2.19	8.36	2.47	0.76	2.74	3.36	2.02	5.37	8.09	1.07	0.98	1.36	8.54	8.1	2.98	0.35
1088	ENSG00000066777.4	<ARFGEF1>	30.13	45.23	39.91	26.45	36.63	35.11	28.08	31.12	42.19	40.78	46.26	39.83	49.22	40.55	51.39	33.8	35.14	32.58	43.84	44.76	45.42	45.15	44.7	45.43	43.57	45.56	43.54	51.28	46.89	33.28	43.37	32.79	40.94	40.88	42	31.93	51.97	43.7	23.83	32.73	66.07	48.93	61.89	40.9	47.98	33.41	39.09
1089	ENSG00000124198.8	<ARFGEF2>	0	3.37	0	0	0	0	0	0	0	0	0	2.47	0	0	0	4.73	0	1.71	0	0	0	1.93	1.39	1.56	1.33	0	0	0	0	1.6	0	0	0	2.38	1.56	1.22	0	2.79	1.03	1.43	4.4	2.58	0	4.96	0	1.83	0
1090	ENSG00000164144.10	<ARFIP1>	6.25	8.62	2.64	9.05	13.66	4.98	11.24	6.45	5.28	6.69	5.26	9.95	7.02	6.57	11.03	4.6	11.87	8.79	7.95	9.95	7.85	10.59	7.37	2.88	4.31	12.15	3.04	3.23	11.05	7.66	5.63	8.9	8.52	7.33	9.28	7.96	6.44	11.26	6.84	6.73	9.71	12.88	3.45	9.55	8.3	7.3	4.78
1091	ENSG00000132254.8	<ARFIP2>	74.51	82.46	79.19	73.61	98.06	80.41	81.25	105.23	86.09	76.32	103.93	75.93	84.62	77.59	101.87	114.98	72.15	81.01	79.07	87.07	74.13	94.97	84.67	76.34	77.43	66.63	79.79	85.56	80.99	73.16	91.08	92.74	78.5	85.3	86.47	78.13	84.55	89.84	69.96	87.46	95.52	86.07	100.38	75.77	90.68	86.54	92.31
1092	ENSG00000101246.15	<ARFRP1>	100.35	109.56	110.01	111.05	91.02	92.99	115.72	97.55	97.15	97.1	123.94	99.71	97.47	85.15	100.79	119.65	95.24	101.23	93.28	96.15	82.14	65.24	85.76	92.51	78.96	95.5	96.7	98.85	119.6	93.85	151.67	113.32	94.56	104.39	80.69	95.62	84.37	98.21	104.08	101.73	93.73	98.19	108.82	96.2	114.03	91.47	82.97
1093	ENSG00000118520.9	<ARG1>	1.19	0.68	0.96	0.56	1.14	0.61	0	0.72	0.37	0.52	1.11	0.11	1.08	0.31	0.53	0.42	0.38	1.62	0.67	0	0.98	1.72	0.68	0.74	1.26	0.09	1.56	0.67	0.13	0.56	0.21	0.39	0	0	0.15	0.51	2.75	1.13	0.96	0.74	1.18	1.38	0.45	0.71	0.21	0.46	1.15
1094	ENSG00000081181.3	<ARG2>	1.96	3.11	0.32	4.31	3.78	1.56	4.83	7.62	1.18	1.01	1.85	4.42	4.42	3.3	1.72	10.63	1.59	2.25	2.18	1.33	1.13	2.67	1.33	1.9	1.05	2.4	0.86	0.37	2.98	3.42	2.04	7.56	1.57	4.18	1.6	1.24	2.33	2.94	0.77	2.8	1.35	1.33	1.99	1.32	3.07	4.25	8.54
1095	ENSG00000186103.3	<ARGFX>	0	0	0	0	0	0	0	0	0	0	0	0	0	0	0	0	0	0	0	0	0	0	0	0	0	0	0	0	0	0	0	0	0	0	0	0	0	0	0	0	0	0	0	0	0	0	0
1096	ENSG00000134884.9	<ARGLU1>	442.95	400.45	473.56	325.73	526.25	496.89	360.92	356.92	551.21	494.42	347.59	514.52	850.35	447.74	643.44	472.28	427.7	351.01	445.24	810.8	337.7	500.06	568.37	469.84	535.14	496	582.74	496.18	529.66	347.84	352.43	486.64	495.51	737.02	618.03	425.02	657.68	581.26	215.17	339.54	751.4	674.86	693.96	490.66	565.8	426.74	448.72
1097	ENSG00000175220.7	<ARHGAP1>	15.08	11.29	12.53	17.99	15.12	16.92	9.69	12.35	10.55	13.42	17.59	12.07	12.89	15.01	10.54	8.82	11.55	18.04	11.6	7.25	4.7	24.42	9.13	9.67	15.53	6.56	9.8	13.25	10.14	9.89	3.56	11.26	11.06	16.66	13.82	14.43	15.61	11.87	10.44	14.12	13.75	9.42	11.24	8.1	14.69	16.03	13.36
1098	ENSG00000071205.7	<ARHGAP10>	37.06	80.46	36.3	33.64	48.58	30.59	33.59	50.65	35.81	38.95	58.93	30.99	42.02	36.92	66.54	32.57	62.82	54.22	52.19	31.67	57.95	61.51	52.32	55.06	63.46	25.73	37.71	45.51	33.29	44.23	35.1	61.57	61.2	47.55	38.67	24.83	37.69	28.19	53.77	42.36	42.96	21.06	48.09	69.73	63.01	54.66	54.69
1099	ENSG00000198826.6	<ARHGAP11A>	1.27	0.67	0.88	1.66	1.57	1.49	0.92	4.04	1.09	1.6	0.24	0.87	0.59	0.97	1.5	1.55	0	0.68	0.87	1.68	0.69	0.34	0.32	1.74	2.13	2.66	0.42	0.32	0.52	1.22	1.48	1.25	1.19	1.33	0.45	0.49	0.86	1.59	0.13	0.85	1.24	0.93	3.28	0.85	1.01	1.63	1.17
1100	ENSG00000187951.6	<ARHGAP11B>	2.32	1.26	1.77	2.59	2.22	2.56	1.3	2.79	3.32	3.33	1.54	2.84	2.46	2.84	1.18	0.66	1.19	2.82	3.05	2.27	1.38	2.99	2.38	2.16	1.3	2.97	2.81	2.51	2.21	2.47	1.89	1.38	1.44	3.32	1.92	2.04	2.17	2.7	1.86	1.52	3.37	2.29	3.19	0.84	2.73	2.02	4.84
1101	ENSG00000165322.13	<ARHGAP12>	73.63	48.56	65.96	34.09	48.39	74.35	54.93	29.39	87.18	43	31.5	89.98	70.3	53.89	44.83	27.3	39.58	36.95	46.21	103.11	50.45	34.22	48.82	47.05	53.91	70.41	49.51	65.72	66.59	35.46	46.37	30.19	44.22	61.77	62.42	59.65	82.2	54.17	35.18	46.42	88.63	75.39	91.5	51.19	54.59	39.04	39.18
1102	ENSG00000075884.8	<ARHGAP15>	71.21	16.15	91.02	28.19	116.61	44.46	85.68	34.37	84.75	65.13	28.27	90.51	84.38	58.03	45.69	30.79	64.89	29.25	32.93	98.08	6.67	33.69	59.62	42.66	76.31	147.12	50.65	50.42	102.14	48.14	6.43	111.54	31.94	97.73	101.73	67.76	60.98	129.36	43.1	44.82	75.48	220.15	75.59	50.99	50.75	30.98	25.64
1103	ENSG00000140750.12	<ARHGAP17>	124.41	106.14	141.52	102.87	122.9	159.85	123.57	90.98	160.54	125.11	112.68	133.9	135.18	132.49	125.39	112.28	101.55	96.23	130.78	135.97	95.89	124.74	114.38	124.81	116.42	124.03	139.48	144.17	134.15	101.71	94.04	100.13	99.86	119.91	139.5	131.31	142.24	144.7	90.1	113.73	193.47	124.7	166.26	107.26	123.44	115.8	122.11
1104	ENSG00000146376.6	<ARHGAP18>	0	0.18	1.33	0	0	0	0	0	1.14	2.68	0	0	0	0	1.82	0.68	0	0	0.29	0	4.63	0	5.03	3.16	0	0	0	2.07	1.33	0.25	0	0	0	5.48	0	0	0	1.12	1.27	1.06	3.83	0	0.85	0	0	0	0
1105	ENSG00000213390.6	<ARHGAP19>	246.02	74.36	107.2	86.26	206.76	89.33	154.06	80.94	132.94	145.09	87.9	264.15	152.13	123.08	138.81	93.54	128.2	107.81	152.38	259.46	45.71	108.78	134.15	86.22	139.72	121.45	113.51	125.69	96.87	167.5	19.56	97.36	89.12	136.91	141.14	156.52	145.42	127.74	106.88	160.62	145.18	71.71	132.5	110.95	122.01	106.41	69.62
1106	ENSG00000137727.8	<ARHGAP20>	6.82	5.38	9.42	4.67	4.49	13.87	9.1	4.17	13.58	4.12	4.5	9.06	6.64	8.55	1.95	5	6.04	6.25	6.41	6.83	5.97	6.51	1.21	8.65	6.11	13.3	3.97	10.61	10.33	4.76	1.8	3.72	5.37	5.08	3.87	11.54	9.54	9.81	4.57	6.42	10.82	10.07	8.19	4.48	4.8	4.94	5.72
1107	ENSG00000107863.12	<ARHGAP21>	94.77	106.95	127.8	80.87	79.17	109.33	94.43	72.46	116.41	93.8	82.09	127.01	102.22	112.56	94.73	56.18	87.68	92.66	102.28	106.35	65.26	81.9	101.82	106.82	102.18	94.05	119.71	117.45	111.17	76.38	35.4	72.83	96.95	101.35	131.15	90.75	128.69	81.39	72.47	80.43	148.74	97.43	146	90.45	100.59	84.91	97.12
1108	ENSG00000128805.10	<ARHGAP22>	17.54	9.16	21.43	12.39	13.99	20.14	23.49	5.84	13.65	14.23	9.88	18.55	17	7.52	12.59	3.3	13.46	13.88	8.3	13.93	7.14	9.57	8.53	11.5	8.96	10.01	17.19	22.4	25.13	9.55	9.71	15.11	8.8	21.68	18.15	17.85	14.79	13.02	5.81	15.36	24.42	13.46	28.65	7.73	16.59	15.58	7.13
1109	ENSG00000225485.3	<ARHGAP23>	30.49	21.55	22.42	21.95	38.94	24.23	23.45	36.34	16.32	25.08	19.86	26.82	25.93	15.94	14.23	30.52	18.53	27.96	15.76	24.93	13.31	26.67	21.82	16.85	23.95	22.49	20.07	22.21	26.08	22.17	24.23	22.64	22.49	14.41	25.09	26.83	29.45	18.14	21.98	24.82	29.77	13.21	42.62	31.24	24.41	26.86	27.91
1110	ENSG00000138639.13	<ARHGAP24>	58.78	45.28	67.97	39.59	102.97	34.75	63.97	36.3	49.63	51.72	39.5	86.34	61.45	57.59	43.59	41.15	40.77	37.06	51.8	96.8	17.58	47.06	43.78	36.06	54.4	58.9	56.04	45.89	60.15	51.05	49.07	34.54	39.81	45.42	76.81	74.26	34.4	95.38	33.75	36.66	71.52	46.92	60.24	49.71	35.56	34.59	28.81
1111	ENSG00000163219.7	<ARHGAP25>	11.76	5.62	12.13	5.43	12.74	14.82	12.54	9.28	14.72	7.27	6.83	8.85	6.69	13.94	7.62	3.88	8.32	8.05	6.93	7.92	6.79	14.38	6.52	11.82	10.02	9.93	10.06	15.86	15.82	8.04	5.98	9.59	9.2	13.55	9.14	11.5	9.31	16.01	9.09	8.42	14.28	8.35	10.09	8.95	8.17	9.95	6.14
1112	ENSG00000145819.11	<ARHGAP26>	20.16	29.31	25.08	17.95	38.65	29.1	22.15	26.53	27.38	32.01	28.76	28.1	35.48	25.28	39.75	37.05	28.4	18.93	29.06	32.74	30.16	41.33	44.2	32.07	27.66	22.16	38.22	22.88	23.34	24.95	39.9	33.64	28.33	43.92	29.44	19.01	29.54	30.51	19.05	25.21	29.96	36.33	30.91	26.8	29.23	20.69	34.53
1113	ENSG00000159314.7	<ARHGAP27>	33.36	28.1	30.68	35.5	34.94	51.88	26.85	34.83	37.16	40.41	39.99	26.33	33.68	30.64	31.58	43.44	35.29	33.17	29.12	24.99	23.59	38.75	25.18	38.27	33.64	26.46	30	36.58	39.27	27.6	33.3	33.62	31.41	43.56	23.27	28.7	31.65	36.99	23.88	32.21	44.89	33.61	35.34	39.96	44.3	46.72	36.14
1114	ENSG00000088756.8	<ARHGAP28>	3.57	2.36	3.57	1.39	3.24	5.91	3.37	1.86	3.94	2.09	1.14	3.73	3.63	5.78	1.41	1.26	2.56	2.21	3.58	6.52	1.57	2.87	1.74	3.92	2.9	9.42	3.95	6.87	5.22	4.13	0.86	2.16	2.87	5.58	4.12	5.78	7.09	6.99	2.36	1.78	10.19	5.61	5.56	3.88	2.69	2.03	2.11
1115	ENSG00000137962.8	<ARHGAP29>	10.86	11.56	12.62	9.41	17.85	12.33	7.42	8.78	10.64	12.27	7.97	12.48	10.53	19.27	11.42	11.96	10.59	8.94	21.76	13.03	5.15	17.14	6.96	12.35	10.97	5.72	12.98	10.24	10.17	9.58	2.06	8	13.93	17.17	9.35	8.85	15.14	17.39	4	11.22	18.49	8.33	18.03	15.31	16.24	11.57	17.06
1116	ENSG00000186517.9	<ARHGAP30>	3.47	4.3	7.05	7.89	6.07	5.59	5.06	5.9	6.21	8.15	10.75	3	4.44	6.77	6.12	7.83	6.71	5.55	9.35	4.29	4.15	7.57	2.2	8.81	4.85	5.28	3.32	7.13	11.48	4.46	4.59	6.34	2.68	7.1	4.76	5.89	4.08	13.07	2.71	5.79	9.71	7.68	12.68	7.73	3.7	8.04	5.39
1117	ENSG00000031081.6	<ARHGAP31>	0	0	0	0	0	0	0	0	0	0	0	0	0	0	0	0	0	0	0	0	0	0.9	0	0.49	0	0	0	0	0	0	0	0	0	0	0	0	0	0	0	0	0	0	0	0	0	0	0
1118	ENSG00000134909.14	<ARHGAP32>	11.33	6.39	10.68	8.11	9.38	6.85	7.33	4.48	7.02	7.84	6.12	12.3	9.52	9.43	10.2	4.87	5.54	7.15	9.78	8.89	2.88	11.32	6.36	5.4	5.57	3.46	5.6	10.06	13.67	4.27	2.21	7.1	7.48	11.65	8.95	10.92	6.79	6.83	3.23	7.68	15.68	10.38	11.64	9.21	6.75	5.73	8.78
1119	ENSG00000004777.14	<ARHGAP33>	89.92	28.91	75.2	42.49	64.27	41.52	72.08	52.95	107.99	35.73	52.21	101.74	92.21	65.32	54.45	42.68	68.25	43.8	56.92	103.94	33.35	62.24	65.15	42.28	70.83	58.66	58.61	65	77.66	32.3	14.55	47.46	39.44	69.8	44.03	72.79	45.79	52.87	34.87	41.43	104.6	116.61	89.61	51.71	38.04	31.87	33.25
1120	ENSG00000160007.13	<ARHGAP35>	4.58	9.87	13.16	12.87	3.15	5.27	8.03	7.62	9.06	7.25	7.99	5.94	3.39	10.42	3.47	10.45	7.02	2.21	8.04	8.13	2.42	7.06	6.63	7.73	9.41	6.67	7.89	1.65	6.76	2.89	6.47	5.9	2.34	1.64	4.93	6.27	2.76	3.47	7.01	5.68	16.04	6.77	3.87	4.05	3.47	2.55	2.77
1121	ENSG00000147256.6	<ARHGAP36>	0	0	0.26	0.18	0.11	0.23	0.09	0.17	0.04	0.04	0.04	0.27	0.03	0.28	0	0.11	0.04	0	0.04	0	0.04	0.37	0.14	0.63	0.23	0	0.26	0.23	0.18	0	0.17	0.04	0.13	0.16	0	0.13	0.07	0.02	0.11	0	0.29	0	0	0.04	0.27	0	0.07
1122	ENSG00000147799.7	<ARHGAP39>	103.47	36.93	100.46	63.95	170.13	64.35	111.13	43.12	103.36	68.81	85.07	135.35	113.1	67.83	126.93	116.9	80.45	70.75	89.25	146.09	21.42	88.71	99.19	45.43	99.95	65.92	64.37	74.15	83.24	61.37	28.28	78.15	53.22	87.67	73.59	100.03	68.24	81.5	51.08	83.03	101.04	101.08	76.21	61.95	65.94	79.55	45.78
1123	ENSG00000089820.11	<ARHGAP4>	57.83	49.12	48.1	54.79	56.68	90.19	56.43	50.14	60.43	73.87	105.87	56.19	62.06	67.96	81.98	47.57	48.75	43.05	96.08	47.36	39.32	72.58	27.27	62.72	50.56	64.12	74.36	53.05	89.73	37.46	98.99	65.07	46.78	74.9	43.02	47.15	56.67	90.4	30.32	78.09	80.91	74.36	78.65	64.49	78.1	71.12	64.31
1124	ENSG00000124143.6	<ARHGAP40>	0.2	0.04	0.14	0.27	0	0	0.36	0	0.11	0.38	0.04	0.3	0.22	0.17	0	0	0	0.13	0.16	0	0.11	0.16	0.11	0	0	0	0.04	0.35	0	0.04	0.11	0	0	0.16	0	0	0	0.09	0.11	0.09	1.26	0	0	0	0	0	0.11
1125	ENSG00000165895.13	<ARHGAP42>	19.34	8.32	16.12	7.76	24.98	17.26	20.86	11.08	28.09	17.31	7.15	27.26	27.71	14.31	9.94	9.82	8.64	9.97	19	29.71	12.4	11.53	9.86	10.95	12.79	16.27	9.71	26.54	23.64	14.26	7.44	9.16	11.08	17.04	17.5	20.57	25.56	22.29	9.39	13.9	20.62	15.94	24.92	15.94	17.53	10.72	18.64
1126	ENSG00000006740.12	<ARHGAP44>	7.92	6.1	7.32	3.37	5.18	10.99	8.57	7.59	6.82	9	3.2	10.85	9.43	6.73	6.24	3.05	6.06	5.12	4.5	7.73	6.43	5.48	8.01	7	4.5	6.47	6.64	8.27	10.26	5.24	5.44	5.33	7.01	5.94	9.56	7.92	9.66	8.33	7.12	6.07	10.77	5.23	10.68	6.06	5.76	6.4	9.33
1127	ENSG00000100852.8	<ARHGAP5>	58.41	41.86	43.29	32.14	57.31	47.22	42.29	44.39	53.91	38.66	24.05	75.98	50.54	63.98	34.11	33.05	45.16	40.06	43.98	59.63	36.19	50.26	36.78	38.05	50.18	48.93	35.67	41.84	40.9	41.84	73.27	43.02	42.62	40.79	68.39	46.16	44.79	36.4	45.86	47.57	38.53	69.9	40.84	49.08	40.43	43.91	39.09
1128	ENSG00000047648.17	<ARHGAP6>	15.39	28.81	15.19	38.76	19.45	21.16	16.19	31.73	10.24	26.68	23.27	5.14	18.09	17.83	21.2	27.97	18.38	27.33	33.31	11.35	25.33	24.32	21.05	30.09	21.68	13.63	15.75	22.44	14.32	26.88	16.88	20.64	30.17	18.16	9.8	13.07	19.39	15.26	21.1	26.79	24.83	7.09	22.79	24.95	27.21	24.57	29.56
1129	ENSG00000241484.5	<ARHGAP8>	33.92	9.07	16.1	11.82	30.17	13.53	17.36	9.22	18.99	24.77	15.68	35.25	19.08	31.81	38.02	25.14	33.25	13.75	24.3	49.31	4.57	25.26	36.94	15.02	21.01	23.44	22.99	16.44	11.25	24.06	0.54	15.08	9.24	20.47	20.92	11.58	27.8	23.56	23.46	25.4	27.97	11.07	28.07	7.73	28.84	18.56	13.2
1130	ENSG00000123329.13	<ARHGAP9>	19.5	24	21.29	25.33	36.95	33.74	29.18	39.81	23.3	23.91	34.98	10.23	25.52	29.72	23.09	17.72	27.51	23.96	21.4	13.48	18.83	18.66	6.15	37.32	12.47	30.27	39.46	24.96	47.72	13.77	22.92	22.93	17.12	29.77	40.08	19.81	27.75	36.59	13.39	22.88	39.38	52.92	28.59	22.74	38.62	23.68	21.74
1131	ENSG00000141522.7	<ARHGDIA>	239.59	287.22	257.56	377.15	222.51	223	269.5	319.75	193.2	252.64	406.05	216.83	184.08	173.55	279.35	343.38	219.4	267.81	262.05	214.27	264.4	215.59	186.73	262.76	242.16	263.64	284.12	233.25	239.72	281.32	497.55	248.88	260.02	217.45	264.07	253.65	242.24	325.69	272.54	303.12	223.38	220.29	205.49	310.73	224.39	271.77	307.75
1132	ENSG00000111348.4	<ARHGDIB>	5.35	4.61	4.64	8.67	4.51	9.96	2.18	7.57	10.38	7.03	9.68	5.5	5.66	8.33	9.2	2.9	7.2	10.65	5.79	11.54	3.53	5.13	6.34	9.58	10.69	12.92	12.38	12.27	8.23	4.96	7.13	9.77	4.03	5.72	9.68	6.2	11.15	12.65	6.92	6.53	13.72	5.87	10.23	6.39	3.92	9	4.53
1133	ENSG00000242173.4	<ARHGDIG>	3.38	0.68	4.04	0.36	1.44	1.18	0.76	0.26	0.98	4.26	0.54	2	5.03	0.88	1.2	3.29	0.27	1.4	0.94	7.75	1.15	1.06	1.58	0.83	2.31	0.68	2.42	3.89	0.84	2.36	1.46	0.72	1.37	1.35	2.58	2.14	9.57	0.8	1.35	5.71	10.82	1.5	2.2	0.65	0.53	1.81	3.54
1134	ENSG00000076928.13	<ARHGEF1>	180.39	189.8	231.54	212.81	196.83	235.17	201.85	218.05	235.55	192.46	269.2	187.21	244.45	221.91	212.41	177.75	209.26	188.91	183.17	183.17	165.87	221.07	175.32	237.91	208.44	186.4	212.25	209.34	247.14	162.52	196.82	198.78	200.46	250.07	190.7	181.99	173.47	250.33	136.09	208.15	260.4	236.18	279.96	226.98	271.38	196.01	210.27
1135	ENSG00000104728.11	<ARHGEF10>	300.62	152.98	267.41	161.37	260.72	234.83	271.13	127.48	292.36	221.05	175.46	296.54	314.65	282.65	227.79	182.67	252.49	242.43	272.33	389.64	100.86	289.66	231.78	170.08	269.9	292.25	254.56	233.5	206.21	213.55	80.39	230.06	223.99	337.53	371.95	298.49	216.76	220.84	160.51	237.37	228.27	494.31	260.01	225.01	253.33	212.85	147.88
1136	ENSG00000074964.12	<ARHGEF10L>	62.52	46.13	81.1	60.53	68.37	83.96	71.34	68.69	88.27	71.06	50.89	67.29	82.45	56.8	63.59	31.97	57.53	57.7	50.41	67.03	44.02	76.46	42.98	66.51	59.39	75.94	60.77	64.11	72.72	49.64	53.07	57.18	59.14	65.23	86.9	66.88	70.88	84.98	46.51	80.91	132.45	75.8	98.38	65.22	70.28	57.09	74.72
1137	ENSG00000132694.14	<ARHGEF11>	46.84	49.28	52.95	49.78	50.76	49.57	52.9	46.09	55.21	55.72	50.05	53.05	47.27	42.82	41.32	47.13	43.5	47.53	46.36	53.1	35.82	52.19	37.81	49.75	40.96	44.59	47.63	46.3	46.14	41.32	45.96	37.99	42.84	59.82	53.88	53.13	47.7	48.82	34.3	47.68	53.73	62.19	55.69	50.67	57.63	45.07	54.3
1138	ENSG00000196914.4	<ARHGEF12>	35.41	26.39	25.03	36.71	43.11	24.93	32.87	25.74	24.31	31.84	17.99	55.59	28.21	41.21	25.78	26.12	27.3	28.53	24.05	31.73	11.36	44.34	24.59	19.93	28.13	14.29	26.29	27.77	19.21	27.11	9.98	26.73	19.91	23.1	46.94	35.46	30.27	21.15	27.33	27.74	28.39	27.36	25.72	32.84	24.99	24.49	31.25
1139	ENSG00000198844.6	<ARHGEF15>	21.82	17.14	14.6	33.76	13.85	20.03	33.19	29.32	15.92	22.67	17.95	18.73	36.53	27.91	29.44	71.09	28.23	7.26	30.71	18.29	21.98	35.81	14.62	28.47	31.35	27.69	56.82	26.17	34.32	24.9	29.63	28.4	39.63	23.17	21.24	24.34	27.3	34.27	15.36	21.87	30.1	27.41	24.12	16.07	16.84	29.43	45.87
1140	ENSG00000130762.10	<ARHGEF16>	141.29	41.63	64.43	22.35	99.08	48.29	86.07	35.51	161.77	61.69	45.09	120.3	101.65	41.08	73.86	28.62	51.65	38.92	61.73	190.91	22.55	33.3	86.24	42.38	45.39	119.4	100.09	65.39	73.98	44.75	74.88	40.44	25.11	105.35	191.08	94.2	50.55	60.17	18.02	47.76	114.23	77.46	76.86	104.64	66.19	28.86	36.43
1141	ENSG00000110237.3	<ARHGEF17>	109.51	91.84	90.02	102.62	160.11	97.2	102	99.33	108.06	79.7	141.58	107.82	140.89	98.45	124.42	85.37	121.98	94.41	90.16	118.39	63.16	144.44	120.97	108.66	118.29	110.21	119.64	118.48	84.12	87.29	104.88	76.61	72.53	158.87	170.97	90.95	73.61	112.83	53.55	109.46	141.55	138.06	122.82	116.17	113.8	75.5	85.37
1142	ENSG00000104880.13	<ARHGEF18>	15.06	12.91	11.85	11.63	14.93	12.97	13	11.46	12.01	14.32	15.09	11.61	12.89	14.75	13.12	14.57	17.27	13.31	14.7	14.36	13.46	14.36	12.05	15.18	10.81	14.35	13.44	16.69	15.57	12.86	15.17	17.49	12.12	15.72	14.78	13.96	11.2	11.73	14.01	18.39	16.14	14.15	19.55	16.66	21.86	16.03	14.35
1143	ENSG00000142632.12	<ARHGEF19>	11.24	35.61	7.63	32.48	9.59	12.74	8.81	27.72	8.04	16.64	40.61	8.76	15.11	18.33	7.32	19.14	25.93	18.87	13.54	4.91	21.4	16.39	12.01	15.38	16.33	8.83	6.34	9.47	16.25	10.42	28.95	11.04	11.99	11.51	9.64	15.34	8.63	9.39	24.03	24.66	9.85	10.31	9.93	15.64	20.86	24.22	13.89
1144	ENSG00000116584.13	<ARHGEF2>	294.7	165.95	205.22	176.08	300.87	216.91	251.27	142.56	241.32	233.97	167.47	262.95	274.62	208.14	215.22	241.4	168.88	165.16	186.71	386.23	120.66	201.46	266.37	155.77	212.21	162.02	265.62	238.88	210.01	144.53	364.92	181.56	172.12	236.99	205.52	235.26	274.8	140.76	155.95	119.84	356.5	167	246	127.65	205.33	176.66	156.92
1145	ENSG00000240771.2	<ARHGEF25>	113.39	101.17	163.28	77.25	65.55	124.15	102.27	54.56	183.84	104.26	85.25	133	144.3	114.25	105.41	65.37	124.07	98.87	107.13	112.89	68.23	124.3	81.35	93.02	108.24	94.56	92.29	147.85	179.84	72.23	43.52	100.53	103.98	92.71	128.52	149.83	196.46	116	117.54	86.72	175.02	110.27	141.47	96.37	85.88	94.67	78.28
1146	ENSG00000114790.8	<ARHGEF26>	81.8	76.9	63.79	106.43	116.67	29.07	40.56	120.9	66.71	66.12	122.08	46.19	88.63	135.22	113.56	132.07	137.58	99.07	98.73	56.88	55.29	78.67	123.49	51.78	86.67	63.81	48.1	52.77	35.36	74.87	126.93	136.79	93.12	121.02	84.32	44.6	42.13	69.86	62.72	116.55	41.99	180.14	35.67	119.2	88.61	90.9	75.12
1147	ENSG00000214944.5	<ARHGEF28>	59.18	65.01	71.22	51.9	86.04	60.23	58.72	36.3	80.78	59.64	51.23	68.47	67.05	61.65	65.11	27.86	52.82	55.01	46.85	87.28	61.49	68.27	49.11	58.93	70	68.08	54.9	83.46	72.24	62.3	32.27	55.11	56.62	71.29	73.89	66.54	74.35	88.99	41.82	53.4	82.65	69.42	78.93	64.85	74.43	58.12	39.61
1148	ENSG00000163947.7	<ARHGEF3>	9.3	8.23	15.35	9.39	6.72	13.71	10.09	6.63	9.36	9.55	10.53	8.76	15.83	9.1	4.95	2.46	5.02	3	5.95	13.43	11.33	8.49	6.08	9.5	9.59	10.94	9.36	9.26	11.41	5.95	5.55	7.74	6.66	10.26	6.51	14.07	9.78	16.68	6.21	3.93	12.8	8.54	23.84	7.3	6.38	6.58	10.08
1149	ENSG00000214694.6	<ARHGEF33>	3.59	3.26	4.74	1.59	1.27	2.89	4.38	2.19	5.73	4.21	1.74	5.28	4.34	3.6	2.14	1.92	2.85	3.08	3.23	2.8	3.53	3.78	2.72	3.32	2.58	5.46	5.37	8.12	3.5	1.53	2.36	3.12	3.81	3.49	4.98	4.47	3.73	2.98	3.56	0.72	6.9	4.99	4.18	2.93	3.86	0.89	1.91
1150	ENSG00000213214.3	<ARHGEF35>	1.04	0.27	1.49	5.21	0.14	3.21	1.6	0.02	3.45	2.48	0.84	0.57	3.41	1.19	1.15	2.75	1.97	0.9	1.82	0	0.02	0.81	1.99	2.05	1.32	2.35	2.97	1.74	3.16	1.45	0.68	1.66	0.37	0.62	3.08	0.71	0.42	2.51	1.88	0.22	2.47	4.1	1.52	2.43	1.03	0.52	2.24
1151	ENSG00000183111.7	<ARHGEF37>	14.58	2.38	7.67	6.39	17.23	10.39	17.36	2.76	11.36	5.6	2.25	5.46	9.52	4.7	4.62	7.29	0.94	5.23	6.88	7.75	1.17	5.96	5.72	4.24	9.33	0.86	11.01	13.31	3.84	10.09	0.39	2.58	0.86	2.9	9.92	7.96	4.79	8.8	8.46	3.12	7.28	5.77	7.28	0.82	4.22	6.86	4.25
1152	ENSG00000236699.4	<ARHGEF38>	0	0.04	0.32	0.43	0	0	0	0.02	0	0.02	0.05	0.09	0	0	0	0	0.02	0.04	0	0.02	0.02	0.27	0.66	0	0.63	0	0	0	0.95	0.04	0.06	0.02	0.02	0	0.4	0	0.03	0	0.24	0.22	0.15	0.93	0.02	0.32	0.41	0	0
1153	ENSG00000137135.13	<ARHGEF39>	2.15	3.37	0.98	2.71	1.58	4.39	1.51	0.94	1.18	3.47	0.45	2.31	1.7	3.34	1.7	1.64	2.22	3.11	4.08	2.51	3.01	1.8	4.89	4.53	3.82	2.88	1.39	3.12	2.15	3.69	3.84	1.71	2.28	3.39	0.65	3.25	2.43	4.51	1.24	7.5	5.16	2.07	2.33	3.01	4.36	2.88	2.07
1154	ENSG00000136002.12	<ARHGEF4>	37.51	53.4	48.22	72.78	25.89	44.93	29.45	16.24	48.58	29	41.17	37.05	48.24	49.23	28.01	26.22	70.2	26.54	46.54	28.72	30.25	32.49	69.25	47.05	24.36	52.87	51.78	44.96	40.4	22.35	55.81	32.81	53.1	47.45	28.68	36.02	49.87	17.41	22.5	34.16	43.51	62.98	46.09	26.71	45.84	50.08	28.17
1155	ENSG00000165801.5	<ARHGEF40>	214.31	180.94	194.07	121.31	237.01	178.56	227.35	208	244.45	170.03	175.82	243.16	196.34	144.32	209.81	182.05	202.19	148.68	125.48	332.93	91.25	160.3	199.29	158.46	173.11	200.12	185.78	189.39	198.39	136.82	283.57	160.68	108.53	251.69	217.39	221.15	184.34	180.36	107.12	183.34	237.48	207.32	225.68	240.72	203.76	141.35	196.34
1156	ENSG00000050327.10	<ARHGEF5>	2.19	6.7	2.68	2.26	3.71	4.16	2.95	2.68	2.44	3.78	0.71	2.14	1.53	1.89	3.61	5.87	3.1	1.81	4.28	2.61	4.12	2.44	4.49	3.75	2.14	4.14	2.55	1.38	3.95	1.47	6.04	3.04	1.33	2.71	2.66	3.16	4.55	2.3	3.1	3.88	3.85	1.7	4.22	1.86	3.14	1.22	2.33
1157	ENSG00000129675.11	<ARHGEF6>	35.86	19.97	53.18	25.33	57.01	58.08	50.05	25.21	64.39	36.66	25.02	48.31	50.32	52.49	44.33	18.2	31.57	29.56	29.33	53.62	23.06	52.93	49.64	30.78	52.2	40.68	31.54	48.82	42.53	28.31	17.21	45.05	28.36	54.82	44.91	49.84	44.62	48.3	22.87	23.4	50.44	59.1	59.99	35.35	29.9	32.5	31.12
1158	ENSG00000102606.13	<ARHGEF7>	111.77	126.8	110.82	81.63	152.73	151.09	117.41	106.33	179.73	102.42	102.7	144.24	149.37	148.18	148.98	114.94	91.67	101.56	97.64	209.13	79.3	132.89	134.21	127.15	166.71	121.25	166.32	151.21	120.69	119.13	79.51	109.86	114.08	124.92	232.14	133.89	154.96	133.94	73.89	98.11	173.76	116.02	212.12	145.24	108.18	99.14	173.03
1159	ENSG00000131089.9	<ARHGEF9>	7.88	7.8	16.26	10.3	10.3	18.96	4.48	12.01	17.15	10.85	10.69	17.16	14.4	12.38	12.5	9.91	5.05	13.47	9.02	17.98	12.62	17.77	11.55	10.79	14.52	13.95	10.71	8.85	14.03	13.4	4.61	13.81	11.12	15.69	9.85	11.43	13.68	19.59	10.53	11.47	17.45	11.97	16.92	6.35	11.56	11.46	10.13
1160	ENSG00000117713.13	<ARID1A>	26.86	17.32	21.14	35.54	28.71	22.44	25.92	28.38	24.32	24.88	24.71	15.09	14.92	29.39	21.96	22.89	30.69	35.36	20.8	14.69	16.17	27.27	24.27	25.12	27.15	11.82	16.79	22.84	16.38	35.35	19.65	17.81	20	20.6	18.87	28.13	20.63	18.35	37.42	30.56	22.82	17.8	20.89	29.87	26.84	23.81	24.28
1161	ENSG00000049618.17	<ARID1B>	36.88	36.33	41.57	36.7	38.5	39.53	37.48	35.31	37.74	36.63	28.39	44.83	43.4	36.9	32.54	29	34.22	37.35	35.29	41.13	30.07	40.92	35.99	38.85	43.1	34.05	41.2	42.69	40.76	36.75	22.28	32.74	38.57	36.06	42.26	41.6	39.7	34.57	36.25	37.59	41.16	44.38	44.55	38.45	40.5	35.85	41.14
1162	ENSG00000189079.11	<ARID2>	5.57	9.13	12.74	10.17	17.41	10.09	6.3	10.31	12.68	10.34	9.64	13.29	14.42	13.41	16.32	13.77	9.29	9.69	15.39	18.96	13.84	17.93	14.59	9.47	13.12	13.76	12.98	9.71	18.44	13.22	12.6	12.44	12.83	12.34	11	10.87	13.75	12.63	10.22	11.21	23.72	12.17	21.5	15.73	13.61	11.5	8.76
1163	ENSG00000116017.6	<ARID3A>	3.77	3.71	3.4	3.78	1.58	3.46	2.18	2.81	3.48	2.43	6.39	1.48	2.15	5.08	3.02	2.05	2.53	4.66	3.96	1.76	2.39	2.72	2.56	4.7	1.84	2.27	0.37	4.38	2.71	2	4.11	1.92	7.52	1.99	2.06	1.91	3.38	1.01	2.75	6.1	1.82	0	5.52	1.36	7.37	6.23	6.74
1164	ENSG00000179361.13	<ARID3B>	0.72	1.28	1.51	1	3.19	1.16	1.06	2.3	1.6	1.08	0.85	2.24	3.6	0.64	1.93	0.06	1.89	0.04	0.64	1.14	0.4	1.79	0.66	1.54	0.77	1.65	1.91	0.7	1.97	1.02	1.16	1.22	1.66	3.87	1.17	1.44	0.58	0.24	0.33	1.13	1.94	2.38	1.22	1.34	1.93	2.02	1.61
1165	ENSG00000205143.2	<ARID3C>	0	0	0	0	0	0	0	0	0	0	0	0	0	0	0	0	0	0	0	0	0	0	0	0	0	0	0	0	0	0	0	0	0	0	0	0	0	0	0	0	0	0	0	0	0	0	0
1166	ENSG00000032219.14	<ARID4A>	26.41	18.85	26.62	30.54	34.87	30.57	24.67	28.53	29.58	26.63	17.88	32.97	30.74	37.91	26.88	15.8	27.66	25.49	29.48	29.29	20.36	40.2	25.18	29.53	32.88	16.57	27.12	24.95	24.93	23.19	10.31	20.22	31.25	25.19	25.28	21.54	26.6	31.61	26.08	26.62	28.46	25.96	29.95	27.58	27.12	36.94	24.61
1167	ENSG00000054267.16	<ARID4B>	18.76	19.1	24.65	25.22	50.29	24.23	20.26	23.31	23.25	31.86	24.07	20.6	24.11	29.56	29.67	27.82	18.47	28.8	44.05	33.88	38.76	53.55	24.29	30.18	34.85	33.5	28.66	22.53	20.23	31.68	26.23	25.9	36.27	27.23	14.63	26.9	31.08	31.64	27.02	25.71	40.49	29.1	31.24	40.35	43.04	29.73	22.73
1168	ENSG00000196843.11	<ARID5A>	29.16	31.65	50.15	45.8	56.94	65.05	88.52	77.69	27.01	38.55	55.02	53.89	82.86	29.52	85.53	171.39	32.28	51.18	56.41	57.59	27.37	55.55	44.36	41.93	56.44	36.36	96.19	29.15	75.54	46.03	61.45	55.74	55.29	49.83	18.8	43.27	113.77	61.18	27.35	50.76	90.58	29.77	59.97	65.41	58.88	77.33	51.81
1169	ENSG00000150347.10	<ARID5B>	4.87	2.97	4.95	3.87	4.66	3.91	12.84	9.19	1.14	10.16	2.45	9.56	5.68	4.92	6.79	12.98	3.77	6.78	7.3	10.87	5.21	10.91	5.7	4.33	4.56	0.86	16.77	4.42	8.02	4.36	2.81	5.25	12.05	2.3	3.11	6.09	9.38	2.91	9.05	4.14	8.79	8.97	5.3	5.22	6.19	4.6	36.93
1170	ENSG00000166233.8	<ARIH1>	31.15	41.82	49.52	46.96	47.7	35.82	42.36	51.16	49.51	40.73	52.46	38.63	46.77	45.23	63.41	59.72	45.23	33.19	55.92	66.29	56.64	56.72	50.76	53.5	54.63	42.87	44.91	50.19	55.14	59.08	52.84	37.27	40.72	51.92	53	30.19	71.41	44.38	20.17	44.23	80.15	57.87	81.2	30.15	64.38	53.04	49.3
1171	ENSG00000177479.15	<ARIH2>	43.67	57.67	73.04	70.39	54.53	62.83	53.08	79.99	68.7	47.87	67.48	69.81	50.08	65.26	65.97	70.98	55.15	73.99	64.2	61.89	48.72	60.8	59.57	60.48	58.36	45.47	64.33	68.82	46.28	58.14	52.15	54.19	59.05	62.94	81.84	56.92	58.07	57.41	53.48	85.18	71.85	49.52	54.31	74.53	76.95	61.3	84.91
1172	ENSG00000221883.2	<ARIH2OS>	0	0	0	0	0	0	0	0	0	0	0	0	0	0	0	0	0	0	0	0	0	0	0	0	0	0	0	0	0	0	0	0	0	0	0	0	0	0	0	0	0	0	0	0	0	0	0
1173	ENSG00000120805.9	<ARL1>	21.58	16.6	19.01	18.8	27.55	20.16	27.61	30.99	26.1	17.23	21.82	33.59	13.18	20.38	12.24	30.66	28.22	20.86	22.96	13.81	32.93	35.25	15.42	20.46	19.1	28.68	16.25	32.45	19.64	31.39	40.9	33.16	20	21.87	31.5	28.33	22.31	39.47	32.62	27.31	11.28	15.94	20.35	33.9	11.77	10.85	13.87
1174	ENSG00000175414.6	<ARL10>	9.86	7.2	12.39	3.58	13.27	6.22	12.88	9.88	12.03	5.09	5.59	12.37	11.53	9.3	13.65	12.55	9.65	8	4.36	8.65	6.39	11.34	7.55	7.44	10.09	5.28	8.87	10.27	9.53	6.84	3.39	14.6	10.84	7.07	11.36	6.6	14.66	9.5	6.69	7.29	3.24	10.64	9.36	8.66	3.03	7.93	6.76
1175	ENSG00000152213.3	<ARL11>	0	0	0	0	0	0	0	0	0	0	0	0	0	0	0	0	0	0	0	0	0	0	0	0	0	0	0	0	0	0	0	0	0	0	0	0	0	0	0	0	0	0	0	0	0	0	0
1176	ENSG00000174225.10	<ARL13A>	0.11	0.07	0	0	0	0	0.31	0	0.07	0.2	0	0	0.14	0.09	0	0.48	0	0.11	0.2	0	0.09	0.34	0.2	0.2	0.16	0	0	0.14	0.07	0.18	0.19	0	0.68	0.17	0	0.05	0.23	0.1	0.11	0	0.15	0	0.33	0	0	0	0.07
1177	ENSG00000169379.11	<ARL13B>	24.33	23.39	10.43	13.1	19.96	12.49	15.9	25.61	17.17	11.21	11.38	14.88	14.54	13.85	14.25	16.47	16.45	24.36	16.03	16.39	19.43	18.61	15.1	14.42	19.51	12.59	5.74	13.87	9.87	16.17	30.21	12.77	13.31	12.49	10.47	16.76	19.95	7.89	20.95	17.35	10.57	12.1	9.76	34.98	18.38	21.31	13.27
1178	ENSG00000179674.2	<ARL14>	0	0	0	0	0	0	0	0	0	0	0	0	0	0	0	0	0	0	0	0	0	0	0	0	0	0	0	0	0	0	0	0	0	0	0	0	0	0	0	0	0	0	0	0	0	0	0
1179	ENSG00000152219.4	<ARL14EP>	8.12	13.18	5.22	8.72	19.82	10.75	8.12	12.66	10.24	11.14	6.35	22.65	14.95	14.95	18.2	20.71	10.48	13.31	11.51	9.91	11.11	19.75	16.27	11.34	24.07	12	16.4	14.51	11.44	7.33	11.4	14.88	17.83	6.81	15.19	16.34	15.07	13.16	12.69	9.11	5.85	13.34	8.43	16.31	10.42	26.9	19.04
1180	ENSG00000185305.6	<ARL15>	10	2.81	3.73	5.19	4.66	4.96	5.55	5.64	9.48	6.55	4.74	7	3.17	9.72	4.19	3.25	5.68	5.51	7.28	4.86	3.84	5.39	7.89	6.91	3.42	3.83	7.46	5.63	2.35	9.55	6.19	15.72	4.78	4.72	2.97	10.56	5.72	6.55	7.76	6.38	5.01	5.6	4.97	5.57	4.04	5.9	8.56
1181	ENSG00000214087.4	<ARL16>	41.69	60.33	43.36	48.91	56.2	51.5	48.99	59.36	26.26	48.03	60.47	46.1	31.91	60.93	49.41	38.68	43.17	54.83	59.65	44.75	49.92	52.35	76	51.22	49.1	27.65	40.24	51.5	50.93	45.57	46.51	50.63	35.77	36.2	30.47	41.06	47.86	56.07	47.82	39.95	51.28	44.18	47.41	44.62	52.13	58.92	45.38
1182	ENSG00000185829.11	<ARL17A>	29.19	45.3	40.5	31.97	18.11	31.52	29.48	14.35	27.16	14.99	22.11	24.88	28.24	13.27	23.61	16.95	20.04	20.2	12.65	15.75	22.07	13.03	8.3	12.66	16.25	18.55	22.29	28.22	35.81	13.58	7.41	29.14	25.68	28.92	21.59	39.24	50.29	23.8	21.26	30.69	33.9	26.08	35.2	17.54	19.98	24.49	17.91
1183	ENSG00000228696.4	<ARL17B>	8.64	24.5	14.32	14.91	6.07	19.3	11.31	7	14.4	12.32	13.96	18.66	15.04	15.67	16.36	9.43	12.74	14.91	4.05	10.78	22.95	8.56	9.26	8.32	13.82	16.31	10.33	11.04	14.35	12.8	7.65	13.58	17.7	14.67	23.15	21.5	19.91	8.66	20.78	16.75	11.98	9.11	15.82	19.13	14.98	12.46	10.12
1184	ENSG00000213465.3	<ARL2>	124.19	94.13	73.25	60.55	82.78	80.26	90.68	109.64	108.01	67.59	112.9	101.25	73.83	58.38	117.57	85.44	80.54	100.22	82.48	107.96	88.72	49.45	105.71	79.6	71.57	98.98	104.1	103.65	106.57	98.73	109.08	120.86	82.19	135.65	115.73	103.23	70.01	103.45	71.68	77.7	75.44	79.61	72.21	96.89	105.91	84.09	68.1
1185	ENSG00000102931.3	<ARL2BP>	0	3.24	0	0	1.88	0.95	0.79	1.45	2.36	0	1.29	0	1.67	0	1.08	0.96	0.92	0.74	1.83	1.06	2.29	0	1.79	0.83	0	2.02	0	0	1.33	2.49	0.66	0	0	4.3	1.68	1.47	0	0	2.54	0	3.12	0	4.11	1.21	2.8	0.94	0.55
1186	ENSG00000138175.8	<ARL3>	0	0	0	0	0	0	0	0	0	0	0	0	0	0	0	0	0	0	0	0	0	0	0	0	0	0	0	0	0	0	0	0	0	0	0	0	0	0	0	0	0	0	0	0	0	0	0
1187	ENSG00000122644.8	<ARL4A>	40.79	57.34	49.41	20.63	27.28	32.85	27.95	76.19	45.09	67.86	33.48	33.71	44.45	34.86	29.04	31.42	45.73	29.08	54.67	41.68	54.2	37.1	64.1	53.39	40.43	32.03	70.55	53.13	41.96	38.39	56.01	61.45	53.24	41.12	65.22	23.9	45.18	54.77	48.33	32.6	24.85	39.7	26	58.51	49.67	39.6	76.64
1188	ENSG00000188042.5	<ARL4C>	24.28	11.41	16.68	11.22	11.3	15.68	18.73	12.07	8.83	16.91	14.25	18.43	21.24	16.59	13.23	11.08	8.12	9.75	20.15	10.81	9.23	6.67	4.57	9.61	6.78	9.99	10.1	9.85	14.23	12.46	6.43	6.73	7.99	7.86	14.35	9.67	10.67	11.74	11.14	11.97	13.77	4.03	16.48	7.3	17.78	16.92	10.37
1189	ENSG00000175906.4	<ARL4D>	0	0	0	0	0	0	0	0	0	0	0	0	0	0	0	0	0	0	0	0	0	0	0	0	0	0	0	0	0	0	0	0	0	0	0	0	0	0	0	0	0	0	0	0	0	0	0
1190	ENSG00000162980.12	<ARL5A>	17.51	13.7	12.45	12.85	18.2	22.26	15.78	20.28	21.3	15.02	11.82	26.08	27.71	25.08	12.63	23.06	15.26	20.95	11.22	11.07	17.76	14.02	19.22	19.1	12.04	21.02	15.74	19.79	18.46	20.08	19.28	13.53	17.56	17.36	23.61	14.98	17.25	15.82	14.27	14.53	15.71	17.46	17.32	20.41	11.04	13.22	20.89
1191	ENSG00000165997.4	<ARL5B>	0	0	0	0	0	0	0	0	0	0	0	0	0	0	0	0	0	0	0	0	0	0	0	0	0	0	0	0	0	0	0	0	0	0	0	0	0	0	0	0	0	0	0	0	0	0	0
1192	ENSG00000141748.8	<ARL5C>	0.56	0.13	0.39	0.04	0.86	1.54	0.81	0.04	1.2	0.4	0	0.05	0.93	1.1	0.5	0	0.13	0.85	0	0.16	0.16	0.46	0.04	0.18	0.25	0	0.54	0.14	2.49	0.13	0.04	0.04	0.26	0.45	0.17	0.78	1.05	0.24	0.04	0	1.01	0	0.51	0.09	0.19	0.04	0.38
1193	ENSG00000113966.5	<ARL6>	14.54	13.45	10.63	9.08	7.59	13.06	10.39	11.52	16.16	11.96	9.13	14.12	12.53	14.97	9.11	7.72	9.94	15.65	9.4	17.67	19.65	5.18	11.28	10.9	10.65	16.42	15.16	17.2	10.84	9.24	8.55	12.35	13.49	12.39	15.45	14.65	18.39	10.87	11.97	8.66	13.29	16.98	11.66	8.8	13.99	9.43	11.45
1194	ENSG00000170540.10	<ARL6IP1>	1.27	2.56	1.54	4.89	1.99	1.33	1.8	3.99	1.81	2.72	0.78	2.54	0.71	3.8	0.88	0.63	0.45	5.79	2.23	1.54	0.47	1.72	0.78	0.63	2.76	1.47	2.76	1.19	0.75	6.06	0.84	2.49	3.8	2.59	1.44	2.91	3.24	0.66	2.82	1.22	1.87	0.77	2.82	8.56	0.87	3.07	2.03
1195	ENSG00000182196.9	<ARL6IP4>	473.24	449.44	458.8	427.49	515.96	504.08	496.38	506	467.14	450.68	507.4	448.38	438.35	397.58	458.39	479.61	453.7	436.59	445.75	492.33	458.82	382.14	472	450.62	398.96	473.61	483.09	450.97	497.91	419.36	531.61	480.01	430.44	459.98	481.29	459.35	392.65	502.01	438.8	463.09	510.91	533.16	475.2	501.21	452.27	442.21	457.63
1196	ENSG00000144746.6	<ARL6IP5>	2.23	1.49	2.75	2.5	1.6	2.13	1.64	1.95	1.92	3.94	0.6	4.54	1.69	4.02	1.01	0	1.77	3.26	0.73	2.79	1.58	2.05	1.1	2.96	1.44	0.62	2.09	2.73	1.22	4.66	1.48	0.68	2.54	2.19	1.98	1.04	1.43	0.66	3.21	1.02	1.93	3.48	0	2.66	2.59	0	1.37
1197	ENSG00000177917.6	<ARL6IP6>	23.18	32.55	23.39	16.48	27.02	31.63	18.62	20.08	28.65	23.03	15.96	30.15	34.37	22.9	14.73	16.25	21.97	24.53	28.84	40.28	26.1	21.63	33.31	27.82	36.07	38.17	21.55	23.35	23.16	22.79	21.81	28.53	29.33	24.88	37.17	24.17	40.65	29.97	17.15	14.82	15.61	27.15	31.85	24.26	25.24	17.6	16.71
1198	ENSG00000143862.3	<ARL8A>	31.56	40.94	20.01	20.94	13.68	26.15	23.13	30.83	22.62	15.6	20.21	21.05	30.2	26.33	18.53	13.18	28.61	16.53	9.38	15.75	11.8	14.82	40.7	24.97	18.4	32.02	31.16	18.41	18.96	15.69	14.72	14.32	21.41	23	58.76	38.51	13.07	17.63	8.63	18.05	32.69	46.35	24.86	11.48	14.66	4.79	21.74
1199	ENSG00000134108.8	<ARL8B>	5.06	10.03	6.09	6.19	14.54	11.97	6.57	12.6	6.14	5.92	8.6	8.99	16.49	12.16	9.92	5.11	8.48	10.43	20.13	8.03	12.55	16.61	7.39	14.49	11.96	5.22	3.6	14.46	12.65	18.2	10.48	14.14	4.53	8.48	8.47	7.16	14.23	11.33	4.7	12.6	18.71	3.24	15.25	13.23	26.38	9.24	12.43
1200	ENSG00000196503.2	<ARL9>	0	0	0	0	0	0	0	0	0	0	0	0	0	0	0	0	0	0	0	0	0	0	0	0	0	0	0	0	0	0	0	0	0	0	0	0	0	0	0	0	0	0	0	0	0	0	0
1201	ENSG00000104442.5	<ARMC1>	0	0.4	0.32	0	2.76	0.59	0.25	0.73	0	0.83	0.56	0.9	0.31	0.94	0	1.24	0.34	2.14	0	0.9	0	1.7	1.31	0.94	0	0	1.42	0.39	0.95	0	1.14	0.85	0	0	0	0.38	0	0.51	2.36	0.35	0	1.03	1.62	0.28	0.94	0.57	1.14
1202	ENSG00000170632.9	<ARMC10>	78.19	57.96	56.63	56.8	47.68	55.91	55.53	54.47	63.07	56.63	46.64	70.29	63.6	60.58	48.66	63.01	58.22	63.56	68.23	68.73	62.49	51.06	64.3	57.46	63.62	70.23	59.03	61.65	49.56	68.76	76.72	59.7	54.3	51.23	75.66	66.5	61.28	47.52	63.33	62.12	43.61	54.94	51.94	54.09	42.51	62.8	52.86
1203	ENSG00000157343.4	<ARMC12>	0	0	0.49	0	0	0.95	1.24	0	0	1.66	0.51	0	0.43	1.85	0	0.39	1.7	0	2.27	0	1.68	0.57	0.64	0.71	1.37	0.9	0.51	0	0	0	0.71	0.37	1.24	2.52	0.29	0	1.14	0.45	0.98	0.39	0.72	0.71	0.84	1.3	0.46	0.79	1.54
1204	ENSG00000118690.8	<ARMC2>	6.7	5.01	10.26	6.5	6.14	9.32	5.48	5.79	7.3	9.07	8.22	8.76	7.73	7.43	5.57	5.89	5.68	5.38	6.9	8.76	5.92	6.67	7.73	7.51	5.95	5.59	12.1	8.31	5.69	6.07	2.57	5.22	5.75	10.09	6.32	6.07	7.8	10.18	6.8	7.79	13.43	8.94	9.22	5.22	5.07	4.66	7.02
1205	ENSG00000165309.9	<ARMC3>	0.14	0.04	0.09	0.07	0	0.11	0.34	0.68	0	0.2	0.33	0.37	0	0.15	0.18	0.06	0.4	0.35	0.11	0.1	0	0.32	0.12	0.69	0.09	0.44	0.33	0.07	0	0.55	0.04	0.2	0.15	0.35	0.27	0.25	0	0.14	0.41	1.06	0.1	0	0	0.13	0	0.09	0.46
1206	ENSG00000169126.11	<ARMC4>	0.68	0.5	1.35	0.49	0.92	1.13	0.43	0.39	0.53	0.99	0.09	0.71	1.36	0.28	0.23	0.5	0.25	0.63	0.38	0.85	0.62	0.62	0.41	0.63	0.36	1.23	0.51	1.12	1.15	0.16	0.99	1.25	0.2	0.6	0.48	0.76	2.27	0.8	0.57	1.34	1.86	0.45	1.41	0.89	1.08	0.61	0.64
1207	ENSG00000140691.12	<ARMC5>	16.36	14.26	11.13	51.26	13.75	12.04	16.86	8.71	11.31	15.69	16.74	16.38	22.72	10.04	12.38	17.85	18.46	13.91	14.05	14.64	7.94	8.72	13.22	14.65	11.53	24.81	12.77	15.9	17.97	11.02	21.83	14.32	14.33	11.58	13.59	14.89	11.04	8.7	9.44	12.5	24.42	21.19	16.33	13.28	13.05	10.06	18.14
1208	ENSG00000105676.9	<ARMC6>	33.36	35.16	24.8	22.42	20.28	20.66	23.92	23.39	28.25	22.02	41.5	27.37	17.67	15.8	24.61	28.89	24.79	26.02	22.69	33.66	28.96	17.17	24.23	28.67	18.67	28.92	15.98	24.51	30.44	26.33	62.91	36.11	16.06	28.87	26.26	28.46	28.71	21.28	21.83	34.69	27.95	34.69	28.54	38.02	27.74	27.54	29.89
1209	ENSG00000125449.2	<ARMC7>	3.63	3.74	5.25	6.39	5.03	6.33	5.28	5.35	4.8	4.12	5.08	7.17	7.3	8.13	6.97	4.25	5.94	5.93	6.95	5.47	5.72	5.89	6.11	6.28	4.67	3.7	4.67	6.08	7.93	7.87	3.71	5.55	4.75	4.18	2.72	6.85	4.02	4.08	7.65	5.96	5.15	5.63	7.72	8.95	3.9	5.38	6.52
1210	ENSG00000114098.13	<ARMC8>	43.18	63.92	55.35	66.79	72.26	48.89	40.49	78.56	54.56	45.26	74.49	55.22	52.93	72.57	68.41	70.76	44.53	57.13	75.73	51.82	62.71	75.68	68.92	75.03	61.44	40.7	44.1	55.92	49.03	62.97	65.39	70.14	60.16	49.14	36.5	47.78	56.8	70.1	44.42	64.31	47.53	46.76	55.24	72.56	78.06	74.83	64.29
1211	ENSG00000135931.13	<ARMC9>	8.62	5.78	7.07	6.39	5.91	7.45	5.82	7.07	8.09	6.67	4.12	5.35	4.96	6.94	3.93	5.72	5.63	9.1	9.42	4.71	3.7	4.74	4.44	5.8	5.26	5.61	6.09	6.56	5.6	6.36	5.1	5.4	5.95	4.68	4.76	10.67	10.38	3.68	8.08	3.62	6	3.79	8.07	8.66	6.26	6.17	5.97
1212	ENSG00000126947.7	<ARMCX1>	0	0	0	0	0	0	0	0	0	0	0	0	0	0	0	0	0	0	0	0	0	0	0	0	0	0	0	0	0	0	0	0	0	0	0	0	0	0	0	0	0	0	0	0	0	0	0
1213	ENSG00000184867.9	<ARMCX2>	58.39	53.81	76.98	59.37	43.76	78.15	67.56	51.35	93.41	42.49	67.3	70.89	93.26	85.43	51.46	44.92	44.51	45.52	50.15	90.64	31.64	40.29	66.71	67.63	72.83	72.19	55.11	97.59	70.97	46.34	54.06	53.2	57.06	55.83	70.31	83.62	75.68	75.43	73.34	58.76	74.88	72.72	101.81	61.08	45.71	68.58	45.8
1214	ENSG00000102401.15	<ARMCX3>	87.23	76.09	97.39	84.29	84.46	91	84.65	79.62	98.84	74.64	59.67	103.56	73.81	97.02	68.5	78.57	72.54	72.41	77.85	95.6	63.54	81.3	74.37	78.8	79.23	73.95	75.35	84.86	86.7	72.18	71.97	76.37	75.62	74.87	85.97	85.82	88.31	88.92	67.25	70.08	88.99	68.56	109.98	83.13	87.26	81.38	77.07
1215	ENSG00000196440.7	<ARMCX4>	36.27	26.03	41.31	28.08	39.69	37.7	31.7	30.11	46.01	27.98	25.87	51.46	60.8	39.83	38.37	19.5	28.69	25.47	38.61	60.94	21.71	35.65	44.2	28.04	36.27	32.69	40.11	47.86	43.5	30.3	14.68	35.52	25.37	49.86	31.42	36.75	45.16	43.21	23.01	26.31	62.8	62.26	51.96	25.11	31.25	29.06	31.76
1216	ENSG00000125962.10	<ARMCX5>	9.88	13.52	12.8	14.11	18.22	13.74	10.81	11.57	13.93	14.16	10.49	12.37	13.75	13.94	14.62	12.66	9.09	13.1	13.78	10.81	12.95	20.34	11.97	12.06	13.12	11.45	9.76	13.09	11.93	14.89	10.45	14.16	12.39	10.99	6.94	12.69	12.46	15.02	13.68	12.62	15.32	9.3	15.49	15.75	17	15.47	9.33
1217	ENSG00000198960.6	<ARMCX6>	50.58	38.98	64.87	45.24	86.16	67.29	81.5	45.19	74.91	57.53	45.26	47.36	56.36	61.87	65.37	45.78	42.43	34.87	46.21	71.6	37.21	49.77	53.05	42.8	53.14	42.08	32.14	64.81	62.91	48.26	31.73	47.54	45.7	49.78	17.82	72.15	46.04	71.88	46.19	49.48	60.23	38.81	72.19	44.53	37.68	46.29	30.77
1218	ENSG00000254636.1	<ARMS2>	0	0	0	0	0	0	0	0	0	0	0	0	0	0	0	0	0	0	0	0	0	0	0	0	0	0	0	0	0	0	0	0	0	0	0	0	0	0	0	0	0	0	0	0	0	0	0
1219	ENSG00000143437.16	<ARNT>	82.14	71.21	77.79	91.23	79.88	85.98	72.8	80.85	84.86	80.85	71.14	81.99	79.87	100.23	65.28	67.11	70.72	75.63	70.28	84.86	64.05	83.16	75.76	74.79	67.59	66.71	72.8	80.8	79.22	64.65	41.99	73.95	76.37	75.64	82.5	76.1	78.42	70.97	79.3	74.71	79.43	75.24	89	70.85	90.03	75.81	95.14
1220	ENSG00000172379.14	<ARNT2>	0	0.14	0	0	0.6	0	0	0.22	0	0.16	0	0	0.12	0	0	0	0.11	0.17	0	0.55	0	0	0	0	0.54	0	0	0	0.29	0.15	0	0.59	0	0.97	1.13	0.24	0	0.33	0.59	0	0	0	0.64	0	0.99	0.39	0.13
1221	ENSG00000133794.13	<ARNTL>	21.01	66.9	45.77	65.11	42.25	31.27	32.47	85.83	25.94	50.12	51.47	52.76	18.34	39.85	20.51	48.2	52.75	66.32	54.4	28.17	54.73	65.7	24.04	79.22	49.98	44.99	42.99	19.2	41.28	52.68	40.45	34.95	93.89	49.76	46.37	23.26	61.61	27.6	57.59	54.36	76.13	56.21	22.22	89.46	63.53	67.9	80.38
1222	ENSG00000029153.10	<ARNTL2>	1.56	1.26	1.4	0.78	0.9	2.78	1.06	1.14	1.32	1.01	0.93	1.01	2.08	1.85	1.15	2.2	0.83	0.77	0.76	2.04	0.78	2.49	2.51	1.36	2.85	1.21	4.23	1.07	1.44	1.67	2.31	1.01	0.47	0.73	0.86	1.15	1.45	2.96	0.37	1.3	6.36	0.84	1.66	0.41	0.69	0.89	1.67
1223	ENSG00000241685.4	<ARPC1A>	12.84	38.37	25.59	9.46	20.49	20.81	16.26	9.37	18.84	14.7	19.22	23.04	23.52	13.38	21.96	10.62	14.72	16.95	20.91	32.79	16.66	9.43	25.23	30.14	21.6	17.59	30.38	17.49	19.7	16.26	27.17	35.69	20.46	37.67	40.47	17.48	23.53	15.47	9.74	16.4	27.71	39.75	17.15	21.27	21.93	16.93	16.29
1224	ENSG00000130429.8	<ARPC1B>	99.33	79.45	109.87	151.45	145.92	110.84	141.82	111.39	163.27	97.38	137.5	117.89	95.08	83.85	121.48	87.01	102.8	115.12	76.31	139.17	47.9	88.92	98.41	83.99	103.34	115.86	82.37	119.33	150.52	87.56	116.66	114.49	104.58	111.96	101.52	205.21	101.77	78.52	61.65	98.09	109.85	96.69	121.66	142.1	105.95	114.01	92.61
1225	ENSG00000163466.11	<ARPC2>	475.61	501.44	400.63	418.66	443.33	542.14	446.16	493.31	452.95	439.06	460.54	441.03	393.64	467.2	565.94	427.56	409.73	509.31	407.97	389.24	458.71	472.42	382.26	467.03	506.31	438.95	368.44	469.38	446.71	452.33	469.28	488.65	417.24	454.35	346.31	482.62	441.18	443.48	448.46	449.04	469.12	261.28	459.87	453.01	421.44	552.28	437.91
1226	ENSG00000111229.11	<ARPC3>	15.66	33.47	19.31	28.39	26.58	38.8	34.6	28.16	26.52	17.63	43.9	28.43	26.48	37.04	28.89	25.4	13.55	32.29	42.24	19.78	48.92	49.63	21.66	46.68	33.77	18.8	20.58	41.9	14.42	26.82	24.21	30.65	29.44	49.07	86.76	16.61	31.02	24.76	31.81	38.94	37.13	56.85	33.44	28.96	25.79	23.16	22.23
1227	ENSG00000241553.8	<ARPC4>	78.54	136.83	67.04	102.13	83.77	77.79	72.91	95.38	71.53	123.24	94.16	65.7	60.28	70.91	69	115.14	64.98	87.78	78.11	71	122.35	77.37	82.79	74.59	68.29	108.73	66.88	103.23	72.56	86.98	137.83	74.6	76.48	53.65	82.58	81.81	90.43	73.62	123.18	97.46	93.49	50.58	52.05	104.36	73.61	111.81	89.27
1228	ENSG00000250151.5	<ARPC4-TTLL3>	59.34	31.8	67.9	52.13	59.2	67.79	55.06	30.88	64.67	41.31	36.76	47.83	48.39	58.77	50.33	43.94	50.64	36.67	40.7	65.72	27.01	78.88	46.03	43.91	46.9	26.19	47.31	50.1	56.53	40.55	29.33	43.76	45.67	50.35	40.34	79.04	51.93	41.52	31.16	29.07	55.74	30.16	53.34	43.28	51.9	37.44	45.47
1229	ENSG00000162704.11	<ARPC5>	279.72	273.4	213.31	182.81	248.14	250.97	207.25	218.01	242.29	208.91	203.61	268.92	241.48	246.48	211.72	212.45	227.64	296.68	266.7	280.56	251.81	200.22	204.85	233.43	252.17	288.69	202.5	279.32	221.96	283.79	288.13	235	244.58	217.74	225.35	237.33	297.79	223.04	186.05	260.75	211.64	168.17	237.6	307.09	246.03	281.7	190.79
1230	ENSG00000136950.9	<ARPC5L>	5.46	8.37	5.74	6.19	9.07	6.51	4.27	7.39	6.61	8.4	17.08	11.27	8.28	6.11	11.48	13.44	3.7	7.08	8.55	7.32	7.36	5.09	9.9	10.52	11.21	6.08	9.1	5.19	4.36	5.86	19.88	7.12	4.16	9.87	6.58	6.43	12.41	8.42	5.02	11.61	8.28	7.39	10.14	6.63	6.27	9.95	7.53
1231	ENSG00000128989.6	<ARPP19>	103.33	96.02	75.13	78.77	115.49	94.22	82.71	93.51	74.1	87.97	57.51	112.66	81.38	107.85	89.81	80.82	90.98	87.37	94.97	111.33	79.83	119.1	98.2	80.96	92.65	94.55	82.65	79.85	68.24	110.02	97.27	78.62	82.44	82.17	100.08	89.11	91.98	78.55	76.58	87.42	74.86	95.97	83.78	91.37	69.56	92.69	76.11
1232	ENSG00000172995.12	<ARPP21>	1.45	0.49	0.79	0.27	0.95	0.68	1.82	0.57	1.04	1.12	1.02	1.1	1.14	0.73	0.23	1.09	0.2	0.29	0.85	0.87	1.31	0.55	0.2	0.24	0.22	1.08	0.67	0.84	0.3	0.11	2.29	0.31	0.22	0.09	0	0.29	0.49	0	0.31	0.48	0.61	0.83	0.94	0.15	0.16	0.98	0.02
1233	ENSG00000120500.13	<ARR3>	1.15	0.29	0	0.76	0	1.15	0.4	0	0	0	0	0.97	0	0	0	0	0.22	0.46	0	0	0	0.02	0.09	0.49	0.23	0	0	0	0.56	0	0.26	0	0	0	0.26	0	0.38	0.19	0.2	0.35	0.72	0.34	0	0.5	0	0	0.73
1234	ENSG00000137486.12	<ARRB1>	19.61	15.45	24.44	18.8	16.19	32.97	26.93	20.87	20.89	17.41	8.57	18.94	15.23	19.3	10.77	11.02	14.14	12.7	16.17	13.69	13.86	15.85	9.2	14.85	15.95	18.6	16.76	18.32	26.1	17.22	12.08	22.3	13.63	14.29	14.47	24.34	26.95	29.22	18.46	9.96	26.07	13	19.31	17.55	15.28	15.95	24.16
1235	ENSG00000141480.13	<ARRB2>	128.16	114.15	154.16	144.6	119.03	160.64	154.28	125.09	119.6	174.49	147.05	102.91	146.78	129.59	173.64	96.57	167.44	119.68	122.16	112.94	79.66	96.09	64.19	142.23	80.42	90.06	132.41	118.84	198.4	92.29	74.03	113.84	99.84	169.72	203.83	125.23	136.45	149.64	68.4	112.86	179.76	165.31	191.65	82.81	178.41	106.11	120.19
1236	ENSG00000197070.9	<ARRDC1>	52.02	46.78	42.45	42.34	37.25	45.3	39.25	45.14	37.83	51.15	64.3	42.6	51.21	52.95	51.72	28.39	52.68	40.75	52.82	44.31	33.17	42.2	38.87	49.42	46.33	43.27	68.57	42.58	47.54	41.37	38.78	38.03	57.11	60.96	51.39	35.73	44.27	55.41	37.43	49.54	68.47	46.42	49.83	38.45	60.25	51.91	47.91
1237	ENSG00000105643.5	<ARRDC2>	39.61	48.72	31.82	57.16	24.64	36.41	33.03	62.61	23.43	63.45	44.19	18.02	49.08	44.27	69.78	35.89	55.93	80.83	81.01	36.58	31.45	36.79	112.6	63.97	58.11	28.42	44.15	34.13	37.83	55.79	33.02	72.39	74.07	56.27	31.74	32.7	36.34	47.12	48.39	62	31.94	37.72	41.26	54.52	63.35	70.71	71
1238	ENSG00000113369.4	<ARRDC3>	15.23	11.77	42.17	11.45	8.59	23.08	23.97	6.32	35.91	14.34	17.39	44.4	27.93	25.65	20.67	19.7	11.91	20.4	23.58	36.72	4.52	21.13	10.94	9.72	19.75	10.08	9.75	25.93	22.48	10.95	7.89	5.51	6.02	14.98	19.92	22.95	48.52	15.21	9.87	15.12	24.9	20.21	15.63	17.89	31.46	10.17	10.41
1239	ENSG00000140450.7	<ARRDC4>	0	0	0	0	0	0	0	0	0	0	0	0	0	0	0	0	0	0	0	0	0	0	0	0	0	0	0	0	0	0	0	0	0	0	0	0	0	0	0	0	0	0	0	0	0	0	0
1240	ENSG00000205784.2	<ARRDC5>	0	0	0	0	0	0	0	0	0	0	0	0	0	0	0	0	0	0	0	0	0	0	0	0	0	0	0	0	0	0	0	0	0	0	0	0	0	0	0	0	0	0	0	0	0	0	0
1241	ENSG00000100299.13	<ARSA>	96.38	77.08	69.18	73.77	78.93	76.72	78.37	79.6	118.1	78.38	83.6	70.56	77.92	77.24	98.21	82.6	82.23	78.65	101.56	107.16	61.38	54.56	77.12	86.4	75.81	103.8	94.58	84.42	99.33	79.72	71.75	74.62	54.79	120.1	62.54	86.26	75.69	101.22	59.01	89.19	120.21	127.4	105.02	86.14	102.56	98.94	92.64
1242	ENSG00000113273.11	<ARSB>	0.52	1.15	2.35	0.81	1.94	0.45	1.66	1.47	1.21	1.73	2.32	1.48	1	0.86	1.34	2.77	1.53	1.57	1.42	2.87	1.46	2.16	0.71	2.65	1.17	0.97	2.18	1.74	1.97	1.15	3.08	0.52	1.99	0.81	2.65	1.29	0.89	1.69	0.79	2.78	2.83	1.14	3.48	1.88	1.13	1.79	1.76
1243	ENSG00000006756.11	<ARSD>	24.08	19.25	26.24	28.86	24.04	23.6	24.04	23.28	27.54	23.64	29.81	27.21	24.3	20.51	23.41	14.99	23.81	26.35	27.9	22.23	25.17	26.09	28.2	31	29.15	20.89	14.88	21.56	22.14	28.7	16.5	23.67	25.1	23.62	14.87	28.7	18.37	29.05	24.93	28.65	26.65	15.56	21.45	27.58	25.79	29.32	37.39
1244	ENSG00000157399.10	<ARSE>	6.01	0.45	4.92	5.97	7.64	2.17	5.69	3.16	4.01	3.98	2.74	5.16	5.01	9.5	3.73	2.03	7.2	7.33	3.63	6.06	1.48	9.39	5.79	0.83	6.52	6.03	2.85	5.4	6.66	4.66	0.28	5.7	8.23	5.08	5.14	8.2	1.17	2.32	3.98	4.9	0.95	5.84	2.46	9.47	4.7	9.1	1.04
1245	ENSG00000062096.10	<ARSF>	0	0	0	0	0	0.07	0	0	0	0	0	0	0	0	0	0	0	0	0	0	0	0	0	0.05	0	0	0	0.05	0	0	0	0	0	0	0	0	0.09	0	0	0.04	0.2	0	0	0	0	0	0
1246	ENSG00000141337.8	<ARSG>	2.75	0.81	7.32	2.03	1.74	2.4	2.27	1.86	6.03	1.24	1.14	1.89	2.13	2.68	2.67	0.26	1.48	0.76	3.87	0.47	0.69	5.59	1.51	1.78	3.46	0.33	0.42	2.44	4.09	1.42	0.47	0.77	1.99	1.54	1.13	4.98	2.89	2.06	2.66	2.78	3.12	2.67	1.53	1.19	3.28	2.5	0.79
1247	ENSG00000205667.2	<ARSH>	0	0	0	0	0	0	0	0	0	0	0	0	0	0	0	0	0	0	0	0	0	0	0	0	0	0	0	0	0	0	0	0	0	0	0	0	0	0	0	0	0	0	0	0	0	0	0
1248	ENSG00000183876.8	<ARSI>	0	0	0	0	0	0	0	0	0	0	0	0	0	1.3	0	1.35	0.83	0	0	0	0	0.6	0.43	1.27	1.24	0	0	0	0	0	0.23	0	0.07	0	0	0.65	0	0	1.29	0	0	0	0	0	0	1.96	0
1249	ENSG00000180801.11	<ARSJ>	2.08	0.86	1.4	0.89	2.43	2.6	2.31	1.71	1.09	0.68	0.6	5.88	1.63	1.49	1.1	0.61	1.52	0.48	0.6	1.78	0.66	1.7	1.23	0.51	0.49	1.26	0.81	2.38	1.47	1.42	1.78	1.22	0.75	1.16	0.43	1.36	1.24	2.2	0.92	1.39	3	0.91	0.64	0.32	0.12	0.98	1.15
1250	ENSG00000164291.12	<ARSK>	2.48	4.61	1.66	3.47	2.22	2.17	0.54	3.47	0.32	1.69	3.45	1.94	1.98	5.52	2.78	2.1	1.75	2.93	5.61	1.37	3.28	3.89	4.35	2.9	3.95	1.08	1.42	1.93	0.81	4.82	3.28	2.67	3.85	2.02	1.2	1.71	0.75	2.35	3.61	4.84	1.31	0.53	1.01	3.4	3.17	6.41	1.59
1251	ENSG00000129744.2	<ART1>	0	0	0	0	0	0	0.58	0	0	0	0	0	0	0	0.64	0	0	0	0	0	0	0	0	0	0	0	0	2	0	0	0	0	0.77	0	0	0.91	0	0	0	0	0	0	1.12	0	0	0	0
1252	ENSG00000156219.12	<ART3>	56.79	37.38	28.25	30.54	82.78	60.68	35.7	18.87	44.76	24.23	14.45	82.63	73.1	30.4	20.94	47.48	29.06	45.65	43.16	47.84	13.79	32.33	94.09	55.95	38.36	19.83	33.91	42.26	25.31	62.45	40.6	48.63	24.8	62.34	73.94	53.27	23.99	34.78	26.48	13.02	24.05	90.13	23.51	81.77	79.04	40.87	7.59
1253	ENSG00000111339.6	<ART4>	0.95	0.45	1.54	0.07	0.04	2.54	0	2.06	0.35	0.95	0.36	0.76	0	1.06	0	0.3	0	0.66	0.11	0.36	0	0.99	0.59	0.78	0.77	0.53	0.72	1.84	0.2	0.44	0.45	0.65	0.29	1.04	1.12	0.04	1.05	0.75	1.62	0.33	0.94	0.53	0.35	0.28	0.19	0.46	0.29
1254	ENSG00000167311.9	<ART5>	0.47	1.13	0.32	0	0.19	0.23	4.32	0.22	0.19	0.25	0.15	0.21	6.5	4.75	2.6	1.13	0	0.31	0.38	0.48	0.2	0	1.35	1.87	0.18	0.49	0.16	11.82	0.32	0.24	0.3	0.17	0.4	0	1.37	6.51	0.16	0	0.79	0.39	0.53	0.36	7.21	0.3	0.21	0.07	0.33
1255	ENSG00000117407.12	<ARTN>	3.77	2.7	3.62	1.59	2.02	2.51	10.66	2.59	4.1	3.26	5.45	8.57	6.25	6.24	2.72	6.33	1.34	1.03	0.64	15.73	3.19	3.11	3.46	1.96	2.7	1.32	6.59	2.09	2.12	2.76	2.1	2.69	1.88	1	3.52	1.54	1.99	3.92	0.89	4.08	21.9	4.05	5.49	1.89	1.24	2.07	3.01
1256	ENSG00000173409.9	<ARV1>	6.79	5.35	6.93	4.51	4.65	7.71	4.77	5	6.42	9.59	2.2	7.03	9.16	7.25	4.49	3.53	7.38	3.45	5.61	7.3	5.79	2.94	10.32	6.86	7.91	7.44	7.46	8.45	7.18	5.44	6.64	4.33	5.4	10.9	9.23	7.67	5.63	5.26	5	6.23	7.41	9.99	6.12	3.33	4.34	5.18	6.63
1257	ENSG00000099889.9	<ARVCF>	194.92	57.2	128.31	106.96	237.75	104.96	162.6	63.91	185.51	152.76	152.86	206.69	191.72	145.97	187.33	103.96	136.41	133.11	175.31	318.02	41.45	98.46	167.04	100.22	167	138.36	168.45	128.88	135.85	126.33	41.95	120.2	101.04	217.17	119.33	152.07	139.25	185.47	88.09	174.25	182.76	160.58	163.62	98.88	120.64	113.62	83.52
1258	ENSG00000004848.6	<ARX>	0	0	0	0	0	0	0	0	0	0	0	0	0	0	0	0	0	0	0	0	0	0	0	0	0	0	0	0	0	0	0	0	0	0	0	0	0	0	0	0	0	0	0	0	0	0	0
1259	ENSG00000214435.3	<AS3MT>	0	0	0	0	0	0	0	0	0	0	0	0	0	0	0	0	0	0	0	0	0	0	0	0	0	0	0	0	0	0	0	0	0	0	0	0	0	0	0	0	0	0	0	0	0	0	0
1260	ENSG00000104763.13	<ASAH1>	208.8	196.68	186.05	132.64	203.68	173.63	174.38	173.37	202.64	168.39	144.49	212.29	169.94	199.24	211.31	122.49	165.33	168.4	204.33	173.81	223.24	177.33	155.97	196.8	165.88	216.07	138.4	189.8	179.82	233.82	87.25	157.88	153.66	188.83	171.47	189.09	220.22	166.39	172.38	191.52	212.58	104.01	261.49	129.7	203.81	186.33	148.95
1261	ENSG00000188611.10	<ASAH2>	1.54	0.58	0.67	1.41	1.3	2.02	1.31	0.83	0.76	1.1	2.69	0.81	0.45	0.92	0.58	0.74	0.76	1.46	1.78	0.71	1.8	2.44	0.3	0.83	1.15	1.37	0.3	0.7	1.29	0.84	0.6	0.26	0.44	0.59	0.24	0.42	0.59	1.31	0.61	1.19	0.63	0.36	0.84	0.63	1.26	0.79	0.4
1262	ENSG00000204147.5	<ASAH2B>	1.74	3.58	2.89	2.99	2.97	3.73	2.94	2.7	3.15	3.51	3.79	4.66	3.49	6.2	3.24	3.05	2.72	3.02	3.38	2.47	4.32	4.23	2.72	2.3	3.44	2.8	2.2	3.26	3.89	4.35	4.71	2.01	2.39	2.8	2.13	2.89	4.79	4.04	2.27	4.32	3.36	3.55	3.08	3.55	4.02	3.75	3.06
1263	ENSG00000072444.10	<ASAH2C>	0	0	0	0	0	0	0	0	0	0	0	0	0	0	0	0	0	0	0	0	0	0	0	0	0	0	0	0	0	0	0	0	0	0	0	0	0	0	0	0	0	0	0	0	0	0	0
1264	ENSG00000153317.10	<ASAP1>	24.08	51.24	29.2	27.7	36.47	36.11	25.49	31.78	27.47	33.61	27.5	28.04	33.59	24.99	32.64	34.32	33.18	32.86	34.98	35.02	34.46	39.33	30.97	45.23	34.81	27.65	31.75	20.51	22.33	37.48	41.84	32.79	41.87	27.73	29.58	26.63	32.81	35.08	30.48	25.27	43.95	22.12	41.42	48.22	32.69	31.5	34.8
1265	ENSG00000151693.5	<ASAP2>	14.29	17.63	19.46	8.67	11.72	27.62	11.17	10.71	26.5	20.8	17.59	20.32	23.15	25.19	12.48	8.07	10.19	13.78	14.79	37.69	10.91	13.18	22.24	13.11	20.78	11.88	24.06	15.27	16.4	9.89	13.37	11.02	11.86	22.69	36.16	14.74	18.93	15.75	10.51	8.55	29.36	22.52	28.72	12.71	19.91	8.63	18.31
1266	ENSG00000088280.14	<ASAP3>	60.56	83.07	96.83	75.78	73.52	81.48	68.19	63.31	100.23	68.54	70.76	57.27	67.34	58.36	76.69	40.17	57.64	74.29	47.97	56.98	88.48	68.36	35.23	85.11	47.39	70.74	60.45	106.55	102.97	69.16	40.09	58.67	63.48	77.53	71.29	78.92	92.07	71.81	64.21	50.74	84.29	55.42	128.19	73.78	99.1	81.3	50.78
1267	ENSG00000065802.7	<ASB1>	29.43	38.71	43.94	31.39	48.6	38.8	34.81	35.14	52.15	37.49	39.1	39.51	40.79	28.64	44.79	22.87	31.03	36.32	21.38	41.82	35.26	36.47	46.25	40.57	41.01	37.2	29.82	46.45	45.37	27.4	43.34	41.86	31.69	37.58	32.59	38.42	37.27	47.62	36.13	33.4	43.23	34.74	35.49	38.67	40.68	44.72	22.1
1268	ENSG00000146926.6	<ASB10>	1.02	0.02	0.37	0.07	0.33	0	0	0.26	0.12	0	0	0.09	0.19	0.09	0.28	0.09	0	0.18	0.04	0	0.15	0	0.25	0.07	0.16	0.15	0	0.12	0.11	0.27	0	0.13	0.13	0	0.19	0.22	0.37	0.16	0.11	0.3	0.68	0.09	0.58	0.09	0	0.02	0.04
1269	ENSG00000165192.9	<ASB11>	0.07	0.04	0	0	0.49	0.14	0.13	0	0.04	0.23	0	0	0	0.04	0.04	0.26	0.16	0.07	0.18	0.48	0.02	0.04	0.11	0	0.07	0.07	0	0.04	0.07	0.04	0.06	0.04	0.11	0	0.03	0.18	0.09	0.09	0.04	0.02	0.53	0.03	0.37	0.26	0	0.22	0.09
1270	ENSG00000198881.8	<ASB12>	0	0	0.26	0.89	0.35	1.06	1.06	1.07	0.42	0.76	1.33	0.27	0.21	0	0.07	0.89	1.41	0.66	1.02	0.26	0.62	1.06	0.48	0.44	1.12	0.64	0.16	0.32	0.79	0.15	0.39	0.39	0	0	0	0.82	0.59	0.58	0.3	0.8	0	0	1.25	0.76	0.83	0	0.13
1271	ENSG00000196372.8	<ASB13>	5.58	16.02	8.3	14.49	10.26	7.42	12.3	13.36	9.3	15.78	25.78	5.51	8.36	11.32	12.01	7.42	13.68	13.29	16.57	12.01	14.68	8.74	16.2	10.19	9.66	10.54	14.58	11.52	10.03	12.87	11.93	21.62	25.06	15.01	9.38	5.89	12.88	17.56	16.14	15.47	10.4	16.13	17.62	12.09	24.04	17.71	14.79
1272	ENSG00000239388.4	<ASB14>	0	1.62	2.12	0	0.49	1.79	0	0	1.76	1.57	0	0	1.82	0	0	1.31	0	0	0.02	0.35	0	1.7	0	0	0	0	0	0	1.47	0.18	0	0	1.17	1.47	0.15	0	0	2	0.3	1.56	2.3	0	0	1.11	0.27	2.03	1.32
1273	ENSG00000146809.8	<ASB15>	0	0	0	0	0	0	0	0	0	0.31	0	0	0	0	0	0	0	0	0	0	0	0	0	0	0	0	0	0	0	0	0	0	0	0	0.03	0	0	0	0	0	0.77	0	0	0.33	0	0	0
1274	ENSG00000161664.2	<ASB16>	0	1.4	0	0	0	1.16	1.12	0.24	1.34	0	0	1.48	0.6	0	0.6	0	2.74	0	0	0	0	0.19	0	0.36	0	0	1.28	0	1.61	1.45	1.76	1.82	1.33	0.24	0	1.71	1.42	1.05	0	0	0.89	0.1	0.52	0.02	0	0	0
1275	ENSG00000154007.6	<ASB17>	0	0	0	0	0	0	0	0	0	0	0	0	0	0	0	0	0	0	0	0	0	0	0	0	0	0	0	0	0	0	0	0	0	0	0	0	0	0	0	0	0	0	0	0	0	0	0
1276	ENSG00000182177.9	<ASB18>	0	0	0	0	0.04	0	0.02	0	0	0	0	0	0	0	0	0	0	0	0	0	0	0	0	0	0	0	0	0	0.02	0	0	0	0	0	0	0	0	0	0	0	0	0	0	0	0	0	0
1277	ENSG00000100628.7	<ASB2>	4.29	1.48	3.47	2.48	4.52	8.55	2.85	3.75	1.71	2.77	1.71	2.9	4.04	2.44	1.54	0.78	0.94	1.49	3.1	1.71	3.9	2.99	3.07	2	2.11	2.47	2.55	4.68	3.09	1.89	7.37	1.82	1.59	1.76	3.2	3.33	4.97	6.71	1.6	3.17	10.53	0.9	6.29	3.96	1.33	2.4	3.34
1278	ENSG00000270898.1	<ASB3>	0	0	0	0	0	0	0	0	0	0.65	0	0	0	0	0	0	0.25	0	0.47	0	0	0	0	0	0	0	0	0	0.7	0.18	0	0	0	0	0	0	0	0	0	0	0	0	0	0	0	0	0
1279	ENSG00000005981.8	<ASB4>	0.29	0.7	0.23	0.33	0.84	0.25	0.83	0.28	0.35	0.38	0.2	0.37	1	0.39	0.3	0.22	0.63	0.92	0.69	0.67	0.09	0.35	1.17	0.45	0.59	0.22	0.18	0.23	0.81	0.49	0.02	0.55	0.77	0.59	0.77	0.84	0.4	0.54	0.3	0.82	0.49	1.33	0.38	0.45	0.57	0.94	0.35
1280	ENSG00000164122.4	<ASB5>	0.13	0.09	0	0	0	0.29	0	0.09	0	0	0	0	0	0	0	0	0	0.04	0.47	0	0	0.21	0.2	0	0	0	0	0	0	0	0	0.13	0.26	0	0	0.25	0	0.05	0.02	0	0	0	0.37	0	0	0	0.16
1281	ENSG00000148331.7	<ASB6>	0	0	0.67	0	0	1.92	0	0.85	0	1.28	0	0	0	0	1.73	1.64	0	0	2.01	0	0.67	0	0	0	0.54	0.95	4.44	0.16	0	0.62	5.03	2.73	0.55	0.52	0	2.91	0	0	0.66	0.59	0	2.75	3.61	0	0.83	0	0.11
1282	ENSG00000183475.8	<ASB7>	1.36	0.54	0	0	0.23	0.41	0.83	0.37	0.12	0.16	0.4	0	0.4	0.33	0	0.9	0.27	0	0.4	0.36	0.6	0.97	0.11	0.76	0.52	0.11	0.12	0	0.39	0.4	0.26	0.2	0.27	0.36	0.36	0.27	0.4	0.59	0.72	0.63	0	0.33	0.23	0.56	0.5	0.52	0.38
1283	ENSG00000177981.6	<ASB8>	16.12	16.65	11.52	9.86	44.32	20.72	13.62	16.55	19.79	16.34	14.29	7.42	15.61	17.36	20.49	18.22	13.1	18.13	16.26	15.5	11.46	29.55	18.51	14.8	22.25	9.62	12.58	24.63	13.71	14.91	10.97	18.3	12.96	23.77	13.87	25.7	11.51	18.51	14.57	12.41	15.13	8.81	21.87	12.82	16.36	14.16	8.98
1284	ENSG00000102048.11	<ASB9>	2.32	1.44	2.43	1.43	1.55	3.32	3.22	0.81	4.26	1.28	0.93	3.5	1.89	4.04	2	0.46	0.69	2.01	1.69	1.32	2.99	1.31	3.29	3.41	1.59	2.47	2.05	4.7	2.73	2.36	3.39	2.97	1.3	0	1.27	3.34	3.17	5.68	2.64	1.39	4.29	2.89	3.64	3.01	2.14	2.64	1.58
1285	ENSG00000138303.13	<ASCC1>	62.72	61.88	38.74	55.57	73.77	53.96	52.39	60.55	61.31	59.98	62.29	55.61	46.96	71.04	51.85	34.01	59.27	71.56	55.76	57.17	59.85	72.21	67	58.44	68.51	52.72	41.71	48.24	40.13	72.87	49.54	61.68	63.63	48.86	49.07	63.58	44.02	44.97	54.09	63.25	31.41	42.56	39.36	73.26	53.8	67.59	56.98
1286	ENSG00000100325.10	<ASCC2>	35.39	57.96	55.45	56.02	59.16	40.5	53.38	66.05	51.85	46.87	84.22	37.51	41.11	60.68	72.66	72.44	60.94	68.08	57.7	33.5	53.96	72.21	54.35	50.04	48.85	35.88	36.27	64.72	40.69	66.67	53.26	58.14	33.04	53.87	36.5	42.31	46.23	39.71	54.55	61.95	58.49	24.41	51.63	46.49	72.73	46.64	52.31
1287	ENSG00000112249.9	<ASCC3>	19.54	31.74	19.71	20.28	15.77	19.3	18.48	21.81	23.9	22.04	22.44	28.78	23.39	24.57	20.05	26.51	20.87	25.21	24.83	26.84	29.23	19.72	22.63	23.89	23.41	23.38	22.71	29.15	20.15	24.48	30.89	17.42	24.84	23.9	22.02	23.92	17.64	27.67	18.4	29.61	24.42	29.72	29.88	22.46	28.98	22.98	17.23
1288	ENSG00000139352.3	<ASCL1>	0	0	0	0	0	0	0	0	0	0	0	0	0	0	0	0	0	0	0	0	0	0	0	0	0	0	0	0	0	0	0	0	0	0	0	0	0	0	0	0	0	0	0	0	0	0	0
1289	ENSG00000183734.4	<ASCL2>	0	0	0	0	0	0	0	0	0	0	0	0	0	0	0	0	0	0	0	0	0	0	0	0	0	0	0	0	0	0	0	0	0	0	0	0	0	0	0	0	0	0	0	0	0	0	0
1290	ENSG00000176009.2	<ASCL3>	0	0.45	0	0.2	0	0.27	0.2	0	0	0.25	0.71	0.6	0.21	0	0	0	0.36	0.24	0	0.83	0	0.12	0.2	0.2	0.74	0	0	0	0.18	0	0.43	0	0	0.57	0.22	0	0	0	0	0.19	0.29	0	0.35	0	0	0.61	0.38
1291	ENSG00000187855.5	<ASCL4>	0	0	0	0	0	0	0	0	0	0	0	0	0	0	0	0	0	0	0	0	0	0	0	0	0	0	0	0	0	0	0	0	0	0	0	0	0	0	0	0	0	0	0	0	0	0	0
1292	ENSG00000232237.2	<ASCL5>	0.36	0.11	0.11	0	0.02	0	0	0	0	0	0	0	0	0.2	0	0	0	0	0.11	0.09	0.07	0	0	0	0.09	0	0	0	0	0	0	0	0	0.17	0	0	0	0	0	0	0	0.02	0	0.13	0	0	0
1293	ENSG00000111875.7	<ASF1A>	0.86	0.74	0	0	0.83	0	0.58	0	1.18	0	1.92	0	0.64	2.81	1.1	0	1.05	1.27	0.54	1.33	0	0.55	0	3.65	0.52	2.95	3.27	0	2.49	0.69	0	0	0	0.62	1.15	0	0	0	0.72	0	0.61	0	0.82	0	0.94	0	0
1294	ENSG00000105011.4	<ASF1B>	0	0.65	0	0.47	0	0.63	0.56	0.09	0	0.43	0.73	0.78	0	0	0.37	0.3	0.22	0.33	0	0.14	0	0	0.23	0	0.05	0	0	0	0	0	0	0.46	0	0.9	0	0.36	0.38	0	0.37	0.87	0.34	0	0.87	0.33	0	0	0
1295	ENSG00000141505.7	<ASGR1>	0.86	1.15	2.01	1.39	0.44	1.06	2.23	3.27	1.78	0.68	1.22	1.33	1.63	0.53	1.43	1.9	0.78	0.46	1.42	1.47	1.51	2.64	0.69	0.38	1.84	1.52	1.48	2.16	1.87	0.62	1.89	0.53	1	0.95	1.34	2.36	1.57	1.31	1.33	0.74	1.98	0.84	2.68	2.17	1.42	1.22	2.53
1296	ENSG00000161944.12	<ASGR2>	0.2	0.34	0.7	0.62	1.92	1.11	0.79	0.99	1.64	0.7	2.6	0.44	0.26	1.27	1.5	0.74	0.51	1.33	1.18	0.47	1.62	0.64	0.2	1.6	1.64	1.21	0.47	0.39	2.8	0	0.94	0.5	0	0.55	1.15	0.42	0.1	0.87	0	0.71	1.64	0.24	0.77	0	0.27	1.05	0.22
1297	ENSG00000116539.6	<ASH1L>	17.11	9.97	11.06	13.32	15.79	10.11	9.02	12.69	10.06	15.96	9.49	14.86	11.51	13.52	8.24	11.45	10.28	13.97	10.55	14	5.28	14.52	11.35	13.66	13.8	9.11	8.68	17	13.88	14.48	6.04	9.35	6.88	18.28	12.77	8.87	10.5	11.36	10.35	15.42	17.83	11.19	15.23	9.05	14.78	10.15	13.89
1298	ENSG00000129691.11	<ASH2L>	54.46	38.76	41.73	27.88	40.7	39.82	37.48	36.94	50.02	42.4	28.23	51.88	35.42	49.32	34.29	29.87	37.27	38.77	53.91	48.62	51.71	38.06	39.55	34.42	44.11	40.98	41.13	39.83	44.67	35.21	34.67	43.1	46.89	50.05	31.54	37.13	34.52	34.34	35.07	40.46	41.56	42.08	45.6	45.06	40.56	42.43	43.66
1299	ENSG00000110881.7	<ASIC1>	4.97	3.15	7.98	2.24	3.1	9.14	5.76	2.33	8.48	3.06	3.23	6.89	4.44	2.86	3.54	3.16	3.01	3.41	2.98	4.65	1.77	3.87	2.93	2	2.13	8.14	2.9	12.17	8.52	1.82	1.69	1.29	1.22	1.85	2.92	7	7.84	4.15	3.39	2.41	9.78	4.98	10.16	2.69	1.93	2.02	1.74
1300	ENSG00000108684.10	<ASIC2>	0.43	0	0.3	0	0.25	0.34	0.02	0	0.49	0.16	0	0	0	0.29	0.11	0	0.6	0.33	0	0.1	0.04	0	0	0.53	0.32	0	0.28	0.28	0.95	0.49	0.26	0	0.47	0.09	0	0.25	0.12	0.07	0	1	0.55	0	0	0.17	0	0	0.04
1301	ENSG00000213199.3	<ASIC3>	25.87	14.39	17.49	14.69	30.8	37.36	25.02	17.78	27.16	24.34	21.69	24.38	35.62	29.47	24.14	14.46	27.03	16.66	18.13	40.37	10.98	22.21	25.28	15.92	29.71	21.61	24.94	26.17	18.1	15.29	50.09	18.3	13.89	30.7	29.06	20.97	21.98	25.13	11.19	17.44	44.29	41.01	23.04	26.36	19.16	16.38	19.94
1302	ENSG00000072182.8	<ASIC4>	0.79	0.18	0.44	0.29	0.33	0.48	0.16	0.61	0.67	0.47	0.73	0.87	1.7	0.24	1.49	3.62	1.21	0.66	0.25	0.59	0.27	1.73	0.64	0.31	0.76	1.67	0.54	0.32	1.15	1.33	0.68	1.01	0.29	0.92	0.52	0.22	1.01	1.13	0.41	0.91	1.43	1	0.35	0.28	0.51	1.53	1.37
1303	ENSG00000256394.2	<ASIC5>	0	0	0	0	0	0	0	0	0	0	0	0	0	0	0	0	0	0	0	0	0	0	0	0	0	0	0	0	0	0	0	0	0	0	0	0	0	0	0	0	0	0	0	0	0	0	0
1304	ENSG00000101440.5	<ASIP>	2.1	2.59	5.23	4.2	2.96	10.09	11.91	2.3	6.52	3.89	5.26	6.47	5.71	9.1	7.59	0.61	3.3	4.94	2.83	2.56	4.95	6.74	1.65	3.45	6.36	2.97	1.63	9.96	10.01	4.04	0	1.73	4.47	4.16	6.43	7.96	10.29	3.12	12.8	2.65	7.02	0.36	6.64	1.56	3.51	4.99	0.51
1305	ENSG00000126522.12	<ASL>	72.77	95.03	71	122.38	60.41	59.12	66.62	89.52	80.18	78.28	164.91	56.7	70.2	94.45	77.73	91.94	114.99	110.65	114.45	71.03	100.39	78.98	80.27	121.02	83.03	82.1	107.63	58.06	63.59	102.56	113.04	82.73	105.28	127.94	47.26	54.67	60.63	96.52	90.01	100.19	81.22	81.4	71.06	127.09	101.99	110.16	90.77
1306	ENSG00000196433.7	<ASMT>	1.78	1.64	1.21	0.63	1.44	1.18	1.33	1.12	1.48	0.54	1.2	1.18	0.41	1.52	1.86	1.44	0.87	0.88	0.56	3.1	0.33	1.91	0.75	1.51	1.93	0.64	1.41	1.6	1.04	0.45	0.23	0.61	0.13	2	1.08	0.93	0.94	0.96	0.13	1.65	1.41	1.02	1.22	0.95	1.12	1	1.65
1307	ENSGR0000196433.7	<ASMT>	0	0	0	0	0	0	0	0	0	0	0	0	0	0	0	0	0	0	0	0	0	0	0	0	0	0	0	0	0	0	0	0	0	0	0	0	0	0	0	0	0	0	0	0	0	0	0
1308	ENSG00000169093.10	<ASMTL>	24.36	20.78	26.08	30.73	35.2	31.54	19.45	23.48	24.69	23.57	24.74	21.5	24.39	24.64	23.62	21.03	23.62	29.43	15.52	12.48	18.43	24.32	21.83	31.59	21.1	27.65	22.78	30.47	37.42	23.75	14.5	25.68	27.51	23.48	20.5	26.5	21.1	22.36	30.56	25.4	30.85	22.09	30.11	22.25	36.85	30.89	17.58
1309	ENSGR0000169093.10	<ASMTL>	0	0	0	0	0	0	0	0	0	0	0	0	0	0	0	0	0	0	0	0	0	0	0	0	0	0	0	0	0	0	0	0	0	0	0	0	0	0	0	0	0	0	0	0	0	0	0
1310	ENSG00000198356.7	<ASNA1>	1.81	3.98	2.63	0	1.14	1.83	1.42	0.73	0	1.92	0.94	1.04	0.46	2.55	2.26	1.03	0.85	4.15	0	1.68	2.77	1.1	2.19	1.52	2.45	2.9	0	0	0	1.71	2.59	1.51	0	1.31	0.98	1.29	0	2.3	2.29	0.69	0	1.76	0	1.37	2.27	0	2.66
1311	ENSG00000070669.12	<ASNS>	44.01	139.34	46.67	38.6	52.31	60.71	44.32	57.5	53.69	43.38	51.43	59.34	63.9	53.78	40.95	73.46	57.26	44.65	54.78	63.76	49.47	40.29	68.72	48.39	43.12	59.47	67.46	58.59	51.43	59.16	307.44	43.69	51.6	55.32	76.65	46.16	59.05	41.14	27.4	49.96	76.47	94.79	47.52	63.21	47.52	53.59	51.61
1312	ENSG00000138381.5	<ASNSD1>	11.58	6.91	2.54	4.99	9.79	4.18	1.8	6.8	12.17	9.09	5.12	6.08	4.63	14.09	3.87	6.02	8.59	6.91	6.72	4.59	10.22	5.61	7.16	7.87	4.94	12.02	8.2	8.99	6.58	5.93	12.1	10.71	12.5	6.32	4.49	5.2	10.48	2.4	8.85	6.05	12.3	9.07	6.52	12.2	7.8	6.86	6.6
1313	ENSG00000108381.6	<ASPA>	8.98	7.49	12.06	5.7	19.56	8.08	17.74	8.78	16.76	3.89	1.13	6.41	3.72	23.01	16.27	4.38	7.43	6.16	8.73	10.54	2	20.23	13.04	1.8	18.51	0	2.39	11.71	0.54	23.91	2.66	8.41	6.3	7.48	6.22	31.39	4.71	10.77	7.28	9.04	8.28	0	3.71	7	0.02	20.45	0.82
1314	ENSG00000204653.5	<ASPDH>	0.93	0	0.51	0.2	1.32	3.19	0.56	0.11	0.47	1.3	0.98	0.28	0.72	0.31	0.99	0.54	0.18	0.29	0.29	3.86	0	2.41	0.92	0.25	1.08	0.27	2.88	0.44	1.22	0.49	0.84	1.16	2.3	0.95	0.29	0.71	0.79	0.96	0.37	0.43	1.09	1.46	0.44	0.26	1.38	0.89	0.73
1315	ENSG00000166183.11	<ASPG>	8.51	2.34	7.47	3.09	10.44	6.13	7.64	2.08	15.64	3.18	3.45	8.96	7.95	4.13	8.93	4.82	4.19	2.78	2.49	3.46	3.33	5.15	3.16	4.62	4.13	2.55	4.57	12.62	13.22	2.76	2.16	5.33	4.2	5.89	2.96	7.4	8.8	2.56	5.07	5.99	9.99	2.58	12.2	4.24	7.13	0.7	2.27
1316	ENSG00000198363.11	<ASPH>	126.67	90.45	83.28	78.37	119.41	116.32	84.9	89.89	106.67	87.87	65.39	106.92	87.21	131.5	70.13	61.03	95.24	88.11	75.82	83.66	130.22	109.95	105	129.68	120.42	114.7	105.04	92.56	92.17	106.71	54.79	113.25	113.6	120.69	131.12	100.78	124.25	77.65	94.43	89.48	91.8	133.46	93.73	113.39	94.57	104.65	112.46
1317	ENSG00000174939.6	<ASPHD1>	8.91	12.04	5.62	7.6	3.29	3.58	5.13	8.19	4.59	7.23	13.47	5.6	9.38	6.02	6.24	20.09	11.96	11.54	10.13	6.19	3.13	3.2	8.72	6.24	7.48	9.16	3.86	5.26	4.09	10.47	19.05	6.69	6.83	5.89	10.02	3.07	6.28	7.93	12.08	17.2	4.02	8.21	5.52	9.25	10.28	11.66	4.67
1318	ENSG00000128203.6	<ASPHD2>	0	0	0	0	0	0	0	0	0	0	0	0	0	0	0	0	0	0	0	0	0	0	0	0	0	0	0	0	0	0	0	0	0	0	0	0	0	0	0	0	0	0	0	0	0	0	0
1319	ENSG00000066279.12	<ASPM>	0.36	0.22	0.09	0.11	0.18	0.29	0.11	0.09	0.32	0.25	0.15	0.19	0.24	1.27	0.41	0.18	0.07	0.24	0.15	0.29	0.07	0.35	0.11	0.09	0.23	0	0.14	0.18	0.13	0.35	0.06	0.11	0.24	0.21	0.22	0.16	0.3	0.38	0.18	0.04	0.78	0.14	0.31	0.19	0.09	0.24	0.04
1320	ENSG00000106819.7	<ASPN>	20.88	11.63	25.64	4.58	24.57	123.67	40.69	20.28	48.63	26.82	4.68	20.69	8.33	10.9	19.38	3.01	7.2	17.3	2.07	25.3	9.29	26.62	16.72	5.53	14.47	25.27	3.48	55.11	46.87	6.69	5.42	13.51	21.59	2.99	20.62	51.47	161.89	23.14	13.22	1.5	90.93	9.18	66.28	7.32	7.46	19.6	7.84
1321	ENSG00000244617.1	<ASPRV1>	0	0	0	0	0	0	0	0	0	0	0	0	0	0	0	0	0	0	0	0	0	0	0	0	0	0	0	0	0	0	0	0	0	0	0	0	0	0	0	0	0	0	0	0	0	0	0
1322	ENSG00000169696.11	<ASPSCR1>	68.89	85.54	60.23	69.21	60.06	49.82	67.11	86.68	62.86	61.08	97.12	60.06	61.9	54.18	69.99	63.08	80.12	85.97	82.7	77.8	76.99	59.95	68.85	80.78	56.92	81.77	76.14	63.2	58.34	76.03	105.86	66.91	75.31	82.85	53.59	57.21	51.48	65.15	58.46	83.66	77.44	64.24	70.6	93.86	90.4	81.27	76.02
1323	ENSG00000162174.8	<ASRGL1>	5.08	6.57	5.64	8.18	13.11	14.62	5.94	10.38	9.94	11.98	7.61	4.36	7.98	21.14	27.51	21.4	9.62	9.56	20.18	16.06	7.89	8.54	9.38	8.27	10.16	8.89	17.86	3.49	6.51	9.66	30.64	13.97	5.51	10.26	8.56	8.02	3.53	9.29	4.89	13.93	12.66	9.62	7.95	17.55	16.89	3.31	11.58
1324	ENSG00000130707.13	<ASS1>	14.74	41.28	34.33	17.06	6.34	16.63	13.9	49.25	17.87	35.64	18.68	8.94	15.4	12.48	20.81	20.86	34.39	16.71	13.32	8.95	29.91	13.72	17.25	29.42	21.37	9.35	16.81	7.5	16.86	23.11	35.31	18.43	20.21	33.4	6.34	22.66	15.98	69.02	64.76	17.83	34.2	6.32	13.87	6.13	42.52	23.11	48.71
1325	ENSG00000034533.7	<ASTE1>	3.82	2.47	3.52	4.94	7.97	3.17	4.86	3.47	4.45	4.86	4.99	4.91	1.02	7.34	7.73	2.95	4.15	3.28	5.28	2.53	3.13	5.57	3.39	4.08	3.78	2.03	0.47	5.84	5.35	5.2	1.59	4.81	0.84	3.8	3.66	4.51	4.92	7	6.56	8.31	7.17	3.74	5	4.83	2.62	6.3	3.12
1326	ENSG00000188886.3	<ASTL>	0	0	0.44	0	0	0	0	0	0	0	0.45	0	0	0	0.21	0	0	0	0	0	0	0.25	0	0	0	0	0	0	0	0	0	0	0	0	0	0	0	0	0	0	0	0	0	0	0	0	0
1327	ENSG00000152092.11	<ASTN1>	0.14	0.04	0.11	0.11	0.51	0.48	0.36	0.11	0.37	0.32	0.11	0.39	0.12	0.95	0.51	0.17	0.2	0.17	0.18	0.22	0.16	0.12	0.04	0.18	0.11	0.15	0.19	0.14	0.13	0.09	0.04	0.04	0.04	0.02	0.1	0.47	0.77	0.19	0.09	0.24	0.26	0.29	0.23	0.19	0.27	0.07	0.29
1328	ENSG00000148219.12	<ASTN2>	20.29	17.27	43.57	30.91	49.41	26.59	46.18	15.54	51.94	18.4	35.58	23.31	22.87	19.85	32.55	13.27	26.72	28.12	29.71	32.6	10.44	44.27	38.84	24.05	29.05	24.04	18.63	26.94	23.3	14.02	16.63	29.31	17.49	10.54	34.85	55.65	16.87	9.37	30.93	11.97	13.38	36.45	16.69	33.49	13.21	15.88	10.41
1329	ENSG00000064102.10	<ASUN>	20.41	18.08	15.33	13.35	10.54	16.09	14.91	15.05	24.06	20.35	16.07	18.04	24.88	19.91	22.51	20.36	17.66	12.05	24.96	17.98	26.72	15.09	24.64	25.23	21.1	24.72	22.5	21.11	16.58	18.06	41.84	15.15	14.53	14.62	25.32	15.59	22.45	21.42	9.88	20.22	18.12	19.61	20.82	12.02	11.95	8.8	14.77
1330	ENSG00000171456.12	<ASXL1>	70.92	69.91	85.65	83.42	119.78	73.01	67.52	73.93	75.06	86.93	75.57	79.94	97.16	93.81	101.89	72.04	62.87	59.1	75.66	78.87	39.05	80.08	87.73	72.09	81.99	51.83	69.72	83.81	94.09	56.03	52.79	53.01	93.58	84.02	69.14	65.99	99.96	91.31	48.41	75.55	97.55	80.56	99.51	65.72	90.08	62.87	89.91
1331	ENSG00000143970.12	<ASXL2>	12.69	11.34	8.21	10.57	10.67	11.24	9.89	11.19	11.7	10.34	8.21	12.53	8.62	11.85	8.84	8.51	9.16	13.01	8.95	10.81	8.05	10.79	13.15	11.63	11.68	7.99	8.2	10.26	9.04	10.86	8.57	10.12	10.42	10.4	11.98	11.98	10.73	8.5	11.16	10.95	11.23	9.59	11.73	12.06	11.4	13.16	10.57
1332	ENSG00000141431.5	<ASXL3>	1.71	1.53	4.08	1.41	2.61	2.81	4.43	0.85	2.13	1.39	2.51	2.1	0.79	5.08	2	0.89	1.32	0.96	1.02	3.2	3.68	4.03	1.69	0.74	2.25	1.41	3.21	2.66	4.02	1.33	1.14	1.33	1.22	3.13	0.93	2.11	1.47	2.23	3.26	1.76	2.28	3.05	1.92	3.64	3.92	2.18	1.23
1333	ENSG00000154438.3	<ASZ1>	0	0	0	0	0	0	0	0	0	0	0	0	0.09	0	0	0	0	0	0	0	0	0	0	0	0	0.04	0	0	0.07	0	0	0	0	0	0	0	0.07	0	0	0	0	0	0	0	0	0	0.2
1334	ENSG00000138138.9	<ATAD1>	41.75	34.05	25.22	29.39	42.25	29.14	29.45	40.56	36.78	32.69	22.8	57.76	30.08	38.99	30.54	28.49	34.66	38.26	34.11	42	44.46	39.23	40.38	31.38	43.08	33.96	26.47	36.74	25.47	38.24	35.25	31.19	33.31	30.72	42.09	39.86	32.91	28.84	43	28.18	19.09	28.46	27.9	39.88	31.75	32.35	27.09
1335	ENSG00000156802.8	<ATAD2>	0.66	0	0.6	0.58	1.13	0.63	0.13	0.13	0.16	0.97	0.65	0.3	0.09	0	0	0.79	0.38	0.76	0	0	0.33	0.11	0.18	0.18	0.49	0	0	0.51	0.22	0.53	0.21	0.11	0	0	0	0.09	0.17	0.3	0.11	0.95	0.78	0	0	0	0.67	0.5	0.42
1336	ENSG00000119778.10	<ATAD2B>	14.71	12.28	13.16	9.07	12.6	8.31	8.7	9.96	15.53	13.22	11.24	12.3	16.35	12.16	10.63	14.53	11.96	8.18	14.01	17.08	17.34	9.67	11.1	12.6	9.51	15.28	20.3	13.18	17.11	10.84	10.24	10.1	12.58	17.09	19.49	9.05	15.94	14.11	8.94	13.58	20.11	15.39	15.07	12.76	17.97	7.49	16.02
1337	ENSG00000197785.9	<ATAD3A>	51.96	36.53	36.85	44.84	29.69	40.12	32.64	39.68	35.83	37.51	53.39	43.4	15.83	19.61	31.99	51.75	35.7	38.48	33.67	49.33	46.72	21.29	31.2	37.11	25.19	71.2	35.49	29.45	32.27	35.53	89.69	39.59	33.27	36.37	36.25	41.29	29.76	34.47	26.85	45.84	33.27	25.58	39.54	38.3	37.47	36.36	33.91
1338	ENSG00000160072.15	<ATAD3B>	44.96	50.63	56.43	42.31	44.85	45.28	33.59	32.17	53.1	48.81	54.53	50.39	41.51	35.45	47.81	49.81	39	33.87	46.49	56.7	46.9	39.47	48	43.18	18.04	33.56	42.31	36.8	55.31	48.46	66.5	40.13	28.95	77.67	70.84	52.47	48.07	43.63	19.47	46.35	59.99	73.79	53.42	40.16	46.65	33.61	60.68
1339	ENSG00000215915.5	<ATAD3C>	2.94	2.68	2.99	4.27	8.06	2.06	3.31	2.46	5.31	1.84	4.96	3	2.56	0	0.9	1.13	4.96	2.43	6.66	1.63	0.47	1.4	3.5	1.14	2.43	1.37	5.29	0.35	2.51	6.64	1.09	2.64	7.72	6.91	2.25	2.51	3.87	11.33	2.05	4.06	8.52	6.46	2.39	3.1	0.71	1.52	0
1340	ENSG00000176208.4	<ATAD5>	0	0	0.3	0.22	0.3	0.14	0	0.11	0	0.09	0.15	0.21	0	0.24	0.07	0	0.07	0	0.34	0	0	0.23	0.12	0.09	0.27	0	0.12	0	0.07	0.05	0.11	0	0.09	0.31	0.21	0.15	0.1	0.16	0	0.13	0.15	0.09	0	0.06	0.11	0.07	0.11
1341	ENSG00000137343.13	<ATAT1>	46	44.81	34.38	46	57.19	39.17	45.75	41.46	53.31	36.57	58.42	47.44	46.38	39.19	52.8	33.41	44.44	45.37	42.11	46.11	29.54	31.18	64.4	43.27	42.52	49.77	47.91	47.45	41.46	40.88	50.82	41.9	41.25	63.69	46.75	44.87	40.44	39.07	44.13	46.05	48.09	58.35	53.06	56.32	43.91	42.69	25.99
1342	ENSG00000167654.13	<ATCAY>	0.13	0	0	0.07	0.11	0.2	0.13	0.04	0.02	0.05	0	0	0	0.11	0	0.17	0.02	0.07	0	0	0.02	0.18	0.25	0	0	0	0.07	0.05	0.09	0	0.02	0.04	0.02	0.07	0.03	0.02	0	0.02	0.02	0.06	0.03	0.29	0	0	0	0.28	0.02
1343	ENSG00000107669.13	<ATE1>	20.56	17.95	13.46	17.55	20.45	19.8	17.22	21.24	20.09	17.61	11.76	24.79	15.3	22.93	13.42	15.06	15.28	20.05	17.08	21.11	18.36	21.36	20.61	19.84	19.21	21.22	16.68	18.04	17.83	20.29	15.55	20.26	20.73	15.86	17.51	20.27	20.49	15.4	16.95	18.87	19.46	13.67	20.75	24.67	16.09	20.56	17.74
1344	ENSG00000123268.4	<ATF1>	13.34	14.76	14.49	19.61	12.37	18.15	18.88	23.13	18.55	19.56	7.73	5.53	6.25	16.62	9.5	5.35	9.15	20.16	7.3	15.92	9.85	9.34	24.66	15.38	11.73	5.08	4.07	31.57	13.49	11.49	13.35	4.74	8.07	9.24	7.13	19.59	12.7	16.59	33.84	19.37	12.53	9.68	13.57	16.11	5.57	19.02	10.57
1345	ENSG00000115966.12	<ATF2>	29.59	26.83	27.18	17.5	42.32	34.78	15.85	29.39	36.41	25.83	17.21	27.32	32.35	22.44	32.02	25.03	24.03	21.21	34.05	38.19	36.1	28.21	33.31	31.92	31.14	28.09	30.61	28.94	28.45	24.3	33.04	19.85	39.46	29.56	34.44	19.7	46.84	24.85	19.16	21.84	37.47	31.59	35.18	26.17	26.94	31.22	23.31
1346	ENSG00000162772.12	<ATF3>	95.18	97.51	297.9	52.55	104.94	108.65	281.71	80.58	156.49	133.26	33.38	225.88	145.42	80.31	127.88	84.18	83.55	65.53	118.84	286.34	44	94.09	76.82	52.9	102.29	82.8	240.1	153.44	285.28	42.13	96.12	121.53	86.31	40.74	147.5	179.31	316.39	108.5	60.52	44.77	293.83	256.08	241.24	76.18	79.39	38.86	145.13
1347	ENSG00000128272.10	<ATF4>	1033.62	1342.44	1033.57	937.19	1034.53	1151.82	995.35	1315.91	984.41	1000.51	981.92	936.12	1065.85	866.01	1032	958.92	1123.91	1046.47	848.09	882.77	1090.21	1009.2	1042.68	1094.44	997.52	1065.54	1141.87	1121.42	1004.7	942.49	1873.41	1113.34	1040.11	947.67	1136.7	888.05	826.8	968.58	1050.97	844.71	874.99	972.36	1002.57	1084.71	881.99	916.6	1064.42
1348	ENSG00000169136.4	<ATF5>	2.94	7.94	3.17	7.31	8.19	17.2	10.88	9.9	6.17	3.45	23.55	7.02	3.06	5.74	7.21	8.18	3.66	7.33	5.55	4.41	11.18	16.62	6.09	5.86	4.27	3.79	3.57	2.65	3.01	8.78	7.65	5.57	3.89	2.47	0.79	5.29	3.76	4.7	8.76	10.84	4	7.94	3.01	4.18	2	14.62	4.31
1349	ENSG00000118217.5	<ATF6>	0	0	0.6	0	0.83	0	0.94	0	0.44	0	0	1.13	0	0.61	0.37	0.61	0.29	0.37	0.96	0	0.36	0.48	1.19	0.53	0	0	0	1.6	0	0	0	0	0	0	0	0.56	0.65	0	0	0.5	0	0	0.44	0.71	0	0.28	1.87
1350	ENSG00000213676.6	<ATF6B>	147.18	155.88	155.23	192.62	157.06	158.22	146.66	159.61	176.14	153.39	208.15	178.52	156.17	188.91	152.6	113	164.99	179.75	169.63	151.68	147.63	177.85	158.46	182.71	169.21	131.51	143.75	157.65	168.34	184.27	162.84	166.3	153.41	207.25	164.42	184.22	143.34	164	152.25	167.39	197.8	186.34	180.2	185.35	177.93	186.97	157.76
1351	ENSG00000170653.14	<ATF7>	70.55	61.61	69.53	61.38	47.24	72.16	56.54	62.22	64.11	70.61	50.92	62.18	66.74	80.33	51.47	50.16	55.82	65.35	47.72	56.55	52.64	62.52	65.93	68.01	70.44	56.5	62.09	77.1	55.9	60.26	38.14	61.81	70.69	65.47	72.15	70.26	74.21	57.08	57.26	53.01	76.3	67.06	70.59	73.11	67.06	57.33	77.69
1352	ENSG00000171681.8	<ATF7IP>	7.59	7.45	19.34	8.65	11.72	11.06	12.86	8.21	14.58	14.61	7.84	21.5	15.42	13.25	8.84	4.45	9.38	9.9	13.12	13.31	8.78	9.11	7.12	9.72	6.41	15.82	18.25	20.18	15.97	11.6	6.13	7.78	4.09	14.7	22.69	10.29	10.03	17.67	11.19	12.62	17.28	16.91	17.32	10.16	13.6	6.82	7.44
1353	ENSG00000166669.9	<ATF7IP2>	10.36	9.74	8.14	7.13	15.24	7.53	4.59	8.07	10.1	9.12	12.13	10.25	10.1	5.45	11.87	10.02	16.38	8.37	10.42	7.98	6.47	14.54	4.85	7.42	7.64	9.14	9.78	10.87	13.35	6.89	11.12	6.91	9.44	13.58	8.87	8.34	18.53	8.89	7.3	11.84	16.8	14.62	15.09	11.41	12.12	12.79	8.8
1354	ENSG00000152348.11	<ATG10>	7.47	8.25	11.2	7.65	7.55	9.01	12.99	8.4	9.9	8.4	8.64	9.91	8.66	10.7	10.01	14.09	8.75	9.03	11.18	10.23	8.87	10.24	11.02	9.7	9.84	10.21	9.01	11.15	10.23	11.6	15.79	8.52	9.49	6.53	11.17	14.83	11.76	16.21	7.58	12.21	8.49	5.91	12.82	8.36	8.26	7.8	12.39
1355	ENSG00000145782.8	<ATG12>	54.24	80.88	60.98	61.76	72.03	76.2	54.32	77.44	70.58	64.73	59.82	69.13	102.93	76.86	68.17	54.87	66.12	49.96	86.07	78.04	92.28	95.8	104.13	89.25	73.05	68.63	70.92	76.15	56.6	61.43	73.15	69.49	79.43	75.38	124.48	48.13	85.95	59.37	53.29	55.29	81.17	65.66	66.27	49.89	59.77	64.43	80.68
1356	ENSG00000175224.12	<ATG13>	122.36	152.64	103.62	148.85	139.39	107.83	89.75	158.6	110.19	152.22	149.93	97.52	117.3	105.7	128.52	99.97	154.2	137.66	137.33	89.58	111.83	141.45	130.58	132.56	118.51	103.76	142.28	100.87	111.69	120.49	126.95	144.33	161.37	157.13	108.02	100.6	91.51	107.63	135.43	130.32	113.28	114.46	121.01	149.76	174.58	135.27	145.1
1357	ENSG00000126775.8	<ATG14>	4.11	6.64	10.61	7.49	29.18	6.72	9.82	9.35	8.06	7.27	10.04	6.27	14.7	15.32	20.87	8.62	10.21	8.18	8.11	13.81	14.3	22.39	15.94	7.31	17.21	8.63	1.33	13.45	14.12	10.77	1.13	10.73	11.79	12.37	3.83	8.67	14.1	15.18	3.06	10.52	16.96	8.51	16.69	8.34	14.27	17.36	4.69
1358	ENSG00000085978.17	<ATG16L1>	39.3	40.92	34.2	35.9	39.62	44.69	34.33	35.59	41.26	40.3	34.07	38.84	36.14	39.52	38.65	33.14	38.34	35.75	33.94	37.7	33.42	35.42	41.43	35.4	31.05	28.79	32.21	33.62	33.03	32.59	44.14	35.02	33.78	44.94	41.54	36.3	41.01	30.74	34.37	39.82	43.08	30.71	42.39	38.15	43.99	35.42	40.98
1359	ENSG00000168010.6	<ATG16L2>	134.55	63.16	134.38	46.99	60.64	101.77	127.39	53.2	159.92	76.21	49.67	158.16	178.94	118.32	69.03	46.85	104.98	68.43	65.42	171.13	48.83	54.19	84.89	78.58	70.08	137.98	152.69	155.44	154.54	51.63	58.02	72.44	58.02	158.77	186.41	111.07	143.45	99.46	42.89	61.41	174.8	264.81	145.01	63.16	116.17	41.19	73.58
1360	ENSG00000110046.8	<ATG2A>	16.11	22.83	23.37	46.76	31.49	20.72	20.41	42.66	23.51	21.88	39.12	21.82	29.75	22.82	25.07	33.36	30.02	30.3	29.39	23.45	23.66	27.38	21.94	30.67	27.44	25.27	22.8	26.29	23.63	32.64	27.72	28.98	25.81	26.61	20.06	22.63	22.78	27.36	24.51	26.83	25.2	26.62	29.31	34.9	35.82	36.18	48.24
1361	ENSG00000066739.7	<ATG2B>	25.66	32.91	35.99	29.98	56.66	41.4	26.85	33.27	42.74	34.54	30.73	45.39	49.08	50.33	42.88	31.24	31.25	36.64	37.88	44.37	25.33	50.88	34.5	41.9	37.77	28.63	48.16	32.5	38.6	30.97	16.67	29.9	43.35	44.4	81.33	30.72	39.3	30.44	23.99	31.95	52.16	55.3	41.37	31.78	43.13	44.89	41.18
1362	ENSG00000144848.6	<ATG3>	16.59	9.45	9.52	16.61	18.61	13.92	12.09	15.45	16.39	16.77	11.46	13.11	16.93	18.42	13.69	14.33	13.82	15.37	21.96	13.84	18.6	14.17	10.62	12.6	11.26	12.44	11.64	12.13	9.04	15.29	13.63	7	12.45	18.87	16.45	11.69	11.85	10.8	11.47	11.35	14.66	17.04	18.16	14.67	11.06	12.83	8.27
1363	ENSG00000101844.13	<ATG4A>	16.7	20.96	15.53	15.25	14.36	19.55	13.42	20.25	23.06	19.41	15.58	23.62	13.03	22.84	13.79	17.59	14.54	18.39	19.42	21.58	20.54	15.6	17.02	21.82	15.66	17.46	20	17.06	13.15	19.62	24.77	17.46	19.4	18.71	20.52	18.85	12.79	15.25	14.14	15.83	25.7	20.3	16.41	16.29	17.96	21.02	24.91
1364	ENSG00000168397.12	<ATG4B>	218.67	181.57	208.65	187.1	213.3	218.75	170.47	208.99	224.14	222.6	188.55	218.26	293.21	243.55	221.34	230.64	217.47	171.29	211.59	240.27	155.54	233.61	227.78	202.44	221.76	213.5	270.77	194.85	210.26	174.01	283.01	184.97	185.44	280.48	284.09	189.67	226.61	211.83	151.1	181.47	251.33	216.83	239.22	201.97	226.18	170.33	224.87
1365	ENSG00000125703.10	<ATG4C>	9.82	6.82	7.11	4.34	3.41	6.85	7.94	6.04	7.23	3.27	6.48	5.09	3.15	11.67	5.91	8.64	8.23	7.7	1.85	4.79	4.46	6.28	7.18	2.47	7.14	9.62	3.48	4.19	6.71	1.96	5.31	9.75	6.39	6.58	3.75	9.31	11.13	5.73	5	6.49	9.36	9.31	7.44	6.37	14.98	8.08	10.59
1366	ENSG00000130734.5	<ATG4D>	24.89	26.56	29.3	34.54	39.38	30.07	29.74	42.38	37.09	32.15	43.44	29.05	33.35	30.33	40.25	22.12	39.08	35.75	37.36	22.55	35.01	42.25	36.42	20.95	27.53	24.14	29.33	30.89	33.28	33.17	34.19	36.66	35.92	35.4	38.94	28.48	29.2	41	40.5	34.64	37.95	34.83	29.24	40.16	39.21	31.69	32.04
1367	ENSG00000057663.8	<ATG5>	33.29	31.2	26.34	21.75	33.66	31.56	23.36	31.07	29.62	29.27	21.33	34.93	28.46	31.94	27.5	25.79	25.46	29.25	29.8	30.47	32.8	28.33	30.66	27.06	29.03	30.53	28.28	31.99	30.68	29.64	32.89	28	31.27	27.21	28.65	29.61	33.09	27.64	25.39	27.4	31.82	29.49	29.38	36.07	28.54	28.04	26.79
1368	ENSG00000197548.8	<ATG7>	18.35	21.07	18.87	32.28	17.06	22.04	18.17	22.06	12.19	22.18	15.99	7.76	11.55	29.47	19.33	9.75	21.38	31.7	21.11	8.72	15.48	24.18	19.12	17.59	23.19	12.97	11.52	9.76	13.92	27.71	17.95	19.65	20.04	20.34	11.94	25.26	18.35	21.66	28.05	20.04	10.91	6.78	8.89	22.22	25.12	19.74	21.75
1369	ENSG00000198925.6	<ATG9A>	78.54	88.31	68.79	102.69	70.43	91.07	79.84	92.54	75.31	90.4	98.12	77.06	75.6	91.57	74.46	73.31	85.7	106.37	84.15	77.74	70.32	86.84	76.2	85.11	89.93	80.97	67.76	75.87	70.48	94.8	82.38	89.82	96.1	77.46	74.49	82.1	73.7	67.28	95.97	100.82	71.49	72.41	62.61	97.15	95.12	100.33	93.98
1370	ENSG00000181652.14	<ATG9B>	5.57	3.06	0.75	7.44	3.98	3.82	3.24	10.31	2.36	7.99	6.14	3.43	5.37	2.77	8.06	76.93	4.89	2.21	5.57	1.07	2.95	5.59	2.81	1.69	3.37	2.57	6.02	1.49	5.58	4.6	6.39	5.88	3.07	2	1.31	5.54	3.11	2.91	1.64	3.41	8.59	2.46	7.56	2.66	2.27	5.31	6.71
1371	ENSG00000142102.11	<ATHL1>	158.67	147.78	190.36	189.18	156.62	98.18	148.68	119.01	195.59	122.82	233.29	132.7	200.33	163.62	188	245	171.26	128.19	261.65	172.45	109.93	136.45	100.74	204.49	119.52	214.29	259.76	208.22	237.51	131.99	106.93	117.9	158.28	186.33	271.69	176.1	141.77	169.96	96.54	215.7	262.72	427.04	265.69	151.39	219.32	155.66	126
1372	ENSG00000138363.10	<ATIC>	96.87	96.43	79.15	77.75	94.54	77.09	72.55	92.41	58.81	67.73	95.14	76.71	61.56	64.13	78.65	87.65	74.92	45.17	59.07	63.8	112.99	38.47	55.82	114.17	78.11	106.07	70.66	98.73	75.38	85.74	164.87	75.37	72.33	95.13	71	78.26	59.14	62.69	63.09	119.54	69.97	84.81	69.84	86.04	89.62	62.41	71.48
1373	ENSG00000198513.7	<ATL1>	19.54	6.52	9.42	5.21	9.56	7.8	13.35	5.42	18.24	12.74	5.81	20.29	11.25	15.34	10.91	5.13	15.03	14.06	12.36	14.41	4.37	11.62	12.9	8.07	18.79	12.7	8.96	5.85	8.59	13.53	1.74	10.19	8.38	10.18	18.65	14.87	5.58	8.97	14.57	11.86	6.29	17.49	6.06	9.77	3.74	10.26	6.91
1374	ENSG00000119787.9	<ATL2>	51.24	50.66	41.76	40.1	53.42	42.78	33.95	49.73	46.31	50.21	40.36	47.74	57.6	45.65	42.53	41.94	39.26	44.58	41.08	52.83	54.31	42.41	47.35	50.44	49.55	41.31	45.01	53.01	45.85	43.64	33.02	40.61	50.65	46.79	61.63	43.22	51.46	40.01	33.21	51.1	60.02	49.55	64.89	50.56	48.25	47.14	66.82
1375	ENSG00000184743.8	<ATL3>	36.02	23.5	29.39	39.01	20.31	30.46	19.24	28.92	25.92	28.37	19.95	25.3	18.55	28.11	19.4	25.7	15.79	37.8	21.35	19.97	21.04	40.54	18.65	30.47	18.51	13.54	20.14	21.37	24.81	27.02	18.3	38.54	33.22	27.89	23.05	27.01	21.14	23.52	25.54	29.18	15.15	14.38	17.67	15.08	23.7	28.27	41.44
1376	ENSG00000149311.13	<ATM>	41.76	41.07	63.45	24.19	50.27	50.03	39.26	25.26	66.11	46.92	27.54	88.92	65.12	80.64	40.37	27.43	42.29	36.62	45.49	82.73	32.55	49.52	51.93	44.76	38.96	33.12	49.02	48.82	57.66	41.7	23.83	36.2	37.56	73.76	106.85	42.67	58.79	42.1	25.3	42.86	64.49	67.7	63.76	34.74	53.85	34.53	49.23
1377	ENSG00000166454.5	<ATMIN>	11.69	10.98	12.41	9.34	23.66	13.31	8.95	11.89	14.03	13.55	12.13	10.71	16.06	12.62	13.01	17.69	7.58	11.22	12.78	15.14	11.49	26.4	17.02	10.46	13.6	11.29	14.61	16.15	9.74	12.97	12.38	8.2	19.69	15.71	18.3	15.39	19.96	18.59	14.57	12.93	18.37	18.58	19.11	14.51	8.72	18.8	14.42
1378	ENSG00000111676.10	<ATN1>	177.2	149.47	177.65	145.97	187.23	145.15	151.9	144.55	178.32	179.92	156.4	218.19	211.58	185.53	159.29	189.76	137.36	159.15	189.67	177.46	118.95	185.05	186.33	162.67	176.35	149.49	244.72	159.12	162.85	164.63	153.06	141.12	154.25	167.79	201.8	184.68	178.9	128.23	148.01	194.47	230.44	253.38	200.28	167.52	197.21	147.85	212.23
1379	ENSG00000172238.3	<ATOH1>	0	0	0	0	0	0	0	0	0	0	0	0	0	0	0	0	0	0	0	0	0	0	0	0	0	0	0	0	0	0	0	0	0	0	0	0	0	0	0	0	0	0	0	0	0	0	0
1380	ENSG00000179774.7	<ATOH7>	0	0	0	0	0	0	0	0	0	0	0	0	0	0	0	0	0	0	0	0	0	0	0	0	0	0	0	0	0	0	0	0	0	0	0	0	0	0	0	0	0	0	0	0	0	0	0
1381	ENSG00000168874.8	<ATOH8>	94.32	104.15	125.61	112.86	65.34	81.98	96.9	88.92	100.07	62.77	66.17	100.49	108.5	153.33	63.32	39.8	122.45	117.54	98.25	150.73	54.84	81.41	71.92	84.17	72.69	125.99	147.55	91.89	120.48	108.82	27.92	132.13	137.27	106.36	177.88	82.77	87.8	104.51	99.8	57.26	106	207.79	103.24	103	117.5	89.62	96.93
1382	ENSG00000177556.7	<ATOX1>	6.52	11.9	7.11	9.92	14.43	9.3	4.92	8.52	12.54	4.75	11.87	4.84	7.21	12.94	6.65	10.15	6.33	6.16	6.63	14.69	5.86	7.23	7.21	10.94	9.84	9	4.46	5.45	8.18	7.76	12.25	6.84	11.5	8.57	4.59	10.89	11.85	13.57	11.54	7.9	13.8	6.25	6.95	7.99	7.64	13.38	11.22
1383	ENSG00000206190.7	<ATP10A>	1.38	7.54	2.15	2.55	0.7	6.86	1.98	1.62	2	3.54	1.33	0.49	2.08	1.39	3.85	1.46	1.79	0.52	1.92	0.66	4.1	4.17	4.58	4.23	1.42	2.18	0	1.56	1.38	1.84	3.24	3.08	2.37	3.94	4.57	0.44	4.81	0.19	4.3	1.15	3.12	0	2.68	2.3	3.33	1.7	3.1
1384	ENSG00000118322.8	<ATP10B>	26.72	9.04	22.39	9.34	42.25	22.06	19.45	11.28	19.08	14.36	24.18	21.7	18.22	33.58	49.72	18.54	14.72	12.4	15.63	44.75	3.84	34.66	45.87	16.59	18.67	11.73	8.73	15.08	27.34	34.77	35.39	13.53	16.5	37.51	14.3	16.68	17.25	20.89	5.5	18.61	33.03	11.02	22.83	26.69	12.43	25.86	10.61
1385	ENSG00000145246.9	<ATP10D>	14.99	26.63	23.25	16.72	20.24	22.19	23.7	15.27	26.17	20.53	17.9	22.25	30.79	19.69	28.54	7.92	22.19	23.85	18.7	25.9	20.58	23.88	28.43	22.58	24.74	25.77	26.48	34.46	23.57	17.26	14.36	19.56	26.48	21.18	49.65	14.63	18.91	16.14	16.5	11.84	29.89	41.47	29.24	21.53	26.23	19.3	18.93
1386	ENSG00000068650.14	<ATP11A>	26.11	28.61	23.58	35.16	39.73	27.15	26.1	28.73	24.46	26.77	33.71	23.68	25.76	27.45	34.07	40.45	24.55	32.69	26.7	24.8	18.67	39.74	21.82	28.82	31.91	19.32	20.09	22.35	25.42	28.33	20.2	22.8	28.44	27.47	22.5	24.77	28	26.36	22.42	27.81	21.75	16.91	31.36	26.97	37.01	35.97	24.49
1387	ENSG00000058063.11	<ATP11B>	8.82	7.45	8.42	9.79	11.05	8.31	5.58	9.28	8.79	8.22	5.32	8.92	9.91	7.34	9.35	8.44	6.66	9.27	7.35	10.38	6.45	12.4	7.66	9.1	9.15	3.24	5.99	6.12	7.43	7.13	4.07	7.47	9.66	9	7.01	7.87	9.47	6.88	6.36	8.03	8.57	5.39	6.24	9.27	10.62	8.6	6.84
1388	ENSG00000101974.10	<ATP11C>	35.07	37.41	30.25	32.66	41.59	34.12	28.37	34.06	39.13	33.88	31.71	36.75	40.42	37.76	31.71	42.5	29.66	40.84	35.94	47.08	38.54	36.49	39.3	38.21	37.66	30.57	36.32	32.66	37.15	32.55	39.62	35.39	38.8	35.35	45.99	37.95	41.75	39.76	23.62	34.12	40.29	35.54	40.34	37.75	34.81	35.88	33.12
1389	ENSG00000075673.7	<ATP12A>	0.04	0	0	0.02	0.11	0.11	0	0	0.09	0	0	0	0.07	0.09	0.09	0	0	0	0.07	0.07	0	0.04	0.02	0	0.02	0	0.05	0.14	0.09	0.02	0.04	0	0	0	0	0	0	0.07	0.09	0.02	0.26	0.03	0.14	0.06	0	0	0.02
1390	ENSG00000105726.12	<ATP13A1>	110.17	99.8	104.25	114.41	160.3	111.19	105.83	125.37	116.04	111.79	153.22	128.36	124.56	98.56	146.45	122.31	117.1	99.74	115.68	120.99	69.23	161.36	124.6	102.92	120.71	108.45	136.82	118.12	113.8	101.96	146.53	103.33	110.32	138.02	148.63	89.28	89.52	119.22	76.79	131.43	126.57	129.76	133.59	126.93	129.41	117.76	101.44
1391	ENSG00000159363.13	<ATP13A2>	45.77	42.94	33.61	25.55	41.44	37.81	35.23	38.56	38.97	32.89	73.45	60.36	31.11	31.43	37.42	40.37	40.11	36.47	34.34	34.47	35.72	29.11	32.23	37.16	29.23	36.62	44.28	39.16	34.07	33.35	48.21	38.38	21.48	51.73	43.29	34.08	28.07	27.91	23.42	40.91	36.67	29.23	35.06	44.66	34.44	35.7	40.59
1392	ENSG00000133657.10	<ATP13A3>	85.16	126.64	66.45	72.13	155.8	70.96	58.16	138.19	91.6	72.72	72.34	94.04	137.52	65.24	96.04	117.89	54.83	71.5	110.94	122.59	58.46	83.48	76.57	84.3	109.63	87.45	74.08	70.59	84.53	78.8	137.85	68.99	71.69	73.8	80.24	72.43	125.09	76.72	38.02	71.89	120.25	79.4	96.06	89.55	112.73	64.74	77.98
1393	ENSG00000127249.10	<ATP13A4>	4.26	2.47	4.25	1.99	1.65	2.89	4.63	2.52	3.85	2.77	3.27	6.45	4.84	6.37	2.79	1.64	4.13	5.01	4.39	7.11	1.57	2.55	2.98	4.86	3.68	4.84	3.5	5.22	3.23	2.42	0.98	3.74	2.12	5.46	5.88	3.24	3.87	3.55	2.32	1.87	8.74	5.37	4.43	8.92	2.34	1.76	3.39
1394	ENSG00000187527.6	<ATP13A5>	0.07	0	0.23	0	0	0.16	0	0	0.21	0	0.11	0.05	0.1	0.07	0	0.09	0.13	0.07	0	0	0	0.09	0.07	0	0.02	0	0	0.21	0.02	0	0.04	0.09	0.07	0.21	0	0.15	0.03	0.02	0.2	0.07	0.03	0.09	0.05	0.02	0.18	0	0.2
1395	ENSG00000163399.11	<ATP1A1>	253.88	600.23	141.12	187.37	151.96	143.72	207.52	470.16	136	163.73	387.62	175.45	164.86	232.28	282.06	346.02	281.53	275.31	296.21	168.34	252.67	139.08	260.35	281.88	152.02	209.91	256.52	165.08	152.35	269.63	975.96	254.89	200.74	187.09	165.08	156.07	178.84	162.36	265.49	275.27	142.55	96.31	170.34	286.21	215.56	251.23	247.09
1396	ENSG00000018625.10	<ATP1A2>	185.24	82.42	109.73	144.65	91.37	104.26	156.77	88.18	198.55	156.45	171.19	149.06	240.41	213.55	167.19	111.54	223.84	257.3	203.22	186.36	105.96	206.92	301.05	192.37	258.61	187.37	283.62	137.28	94.84	199.49	18.25	181.23	176.22	252.69	181.78	157.45	106.11	95.92	127.63	173.01	129.81	116.83	112.34	119.27	153.04	174.23	107.64
1397	ENSG00000105409.11	<ATP1A3>	0.36	0.72	0.42	0	0	0.79	0.29	0.02	0.67	0	0.22	0	0.43	0.95	0	0	0.18	0.29	0.2	0.12	0.09	0	0	0	0.09	0.07	0.35	0	0.7	0.13	0.23	0.28	0.13	0.29	0	0.11	0.38	0.26	0.11	0	0.15	0.31	0.4	0.95	0	0.22	0.26
1398	ENSG00000132681.12	<ATP1A4>	2.73	4.81	2.66	1.94	2.62	4.62	1.44	1.78	1.88	3.36	3.32	2.72	3.56	2.57	2.12	1.48	1.59	3.04	2.27	6.59	0.64	7.69	3.18	2.39	2.94	2.66	6.02	0.67	1.45	1.44	0.45	2.3	1.88	8.9	10.95	3.69	0.77	2.61	1.22	1.24	2.15	3.34	1.45	1.78	4.64	2.74	1.85
1399	ENSG00000143153.8	<ATP1B1>	18.85	19.97	22.11	17.08	31.79	19.86	18.77	41.52	36.34	16.41	22.24	21.24	12.89	61.15	32.29	10.78	28.13	26.76	27.39	36.77	18.67	33.69	33.17	27.06	34.2	20.29	12.4	7.08	9.99	20.31	27.36	37.16	31.59	25.07	26.83	26.81	11.29	17.46	16.89	17.11	22.63	10.33	16.97	41.03	21.2	30.19	10.12
1400	ENSG00000129244.4	<ATP1B2>	0	0	0	0	0	0	0	0	0	0	0	0	0	0.57	0	0	0	0	0.78	0.52	0	0.53	0	0	0	0	0	0	0	0.4	0	0	0	0	0	0.31	0	0	0	0	0	0	0	0	0	0	0
1401	ENSG00000069849.6	<ATP1B3>	168.31	308.45	107.69	153.57	180.33	150.28	220.16	342.48	144.43	189.22	243.9	178.17	209.57	132.98	243.26	695.23	178.39	142.55	243.3	214.98	214.07	112.78	178.82	200.82	152.51	242.6	336.47	170.83	221.96	258.21	478.63	214.35	186.08	172.37	222.88	121.99	169.38	243.18	82.95	147.13	231.31	124.96	207.3	178.57	211.41	99.77	390.15
1402	ENSG00000101892.7	<ATP1B4>	0	0.14	0.07	0	0.18	0	0	0.13	0	0	0	0	0	0.04	0.02	0.06	0	0	0	0.14	0	0.02	0	0	0.11	0	0	0	0	0.02	0.02	0.02	0.07	0	0	0.02	0	0	0	0	0.03	0.14	0	0	0.04	0	0
1403	ENSG00000196296.9	<ATP2A1>	4.6	4.54	12.34	6.44	19.19	5.88	3.48	2.9	5.01	8.55	1.8	3.98	9.69	1.28	7.44	4.73	3.68	5.58	3.79	5.45	1.51	3.93	2.91	3.5	3.84	1.06	6.81	12.57	9.36	3.86	4.71	4.59	2.46	2.61	4.33	3.4	5.63	4.3	4.02	4.97	15.22	4.22	10.4	2.27	8.31	2	1.65
1404	ENSG00000174437.12	<ATP2A2>	93.15	109.14	87.05	125.32	121.74	102.27	94.81	140.1	84.21	91.32	120.25	112.15	74.45	91.11	96.87	142.84	92.44	128.83	106.08	84.06	96.46	135.74	87.7	113.19	112.55	79.92	82.83	97.62	97	107.2	142.29	85.97	95.82	96.9	126.13	104.52	101.07	88.62	93.42	146.55	117.59	75.98	91.5	105.53	114.14	104.32	137.82
1405	ENSG00000074370.13	<ATP2A3>	12.42	20.09	21.44	15.22	11.88	29.34	19.24	23.46	17.92	11.66	15.21	12.79	13.85	18.51	11.05	7.57	10.52	8.15	11.31	12.25	8.71	27.02	9.33	17.23	11.78	14.4	16.54	15.85	31.64	8.87	14.38	7.96	13	12.65	6.39	13.85	22.5	29.4	10.66	21.17	40.1	14.77	30.53	9.03	14.07	13.94	9.09
1406	ENSG00000070961.10	<ATP2B1>	9.14	5.58	9.17	9.03	15.31	21.02	5.24	9.31	15.18	8.82	8.24	11.31	4.46	8.18	13.9	6.89	7.4	10.78	6.97	15.97	4.63	18.73	11.89	7.31	11.55	8.06	4.37	14.18	11.43	10.2	4.31	7.67	10.93	4.6	8.52	10.05	7.02	9.57	11.58	9.11	11.23	5.8	8.42	9.44	15.14	16.69	6.85
1407	ENSG00000157087.12	<ATP2B2>	3.77	2.39	5.02	5.92	4.01	4.43	7.15	1.41	15.55	4.25	0.49	8.46	4.9	10	8.75	0.78	5.11	3.28	3.41	5.28	1.2	7.76	2.26	3.19	9.17	4.69	4.32	3.52	5.51	0.42	0.96	5.27	2.76	2.75	2.35	4.89	3.94	2.58	0.89	1.91	9.36	7.3	3.8	2.97	3	2.44	0.81
1408	ENSG00000067842.13	<ATP2B3>	0	0.02	0	0.2	0.18	0.54	0	0.13	0.07	0	0	0	0	0.28	0.6	0	0.07	0	0	0	0.02	0	0.2	0.02	0.02	0	0.86	0.23	0.04	0.04	0.02	0	0.02	0	0.24	0.25	0.02	0.47	0	0	0.19	0	0.07	0	0.04	0.02	0
1409	ENSG00000058668.10	<ATP2B4>	114.28	128.24	91.18	84.27	86.48	136.05	93.37	77.1	122.29	86.21	89.26	105.97	110.07	101.39	100.93	75.34	90.58	117.45	91.7	90.31	108.69	87.08	166.28	125.21	113.81	105.69	98.88	124.8	97.91	92.93	75.29	101.53	99.58	112.26	100.51	75.23	128.8	84.95	106.9	103.23	124.03	82.48	137.62	98.95	97.12	132.34	77.01
1410	ENSG00000017260.15	<ATP2C1>	125.76	106.82	99.72	77.32	83.19	80.91	102.39	94.23	104.8	85.17	82.35	139.1	101.05	119.35	91.03	74.18	94.91	95.63	97.15	126.49	92.83	68.48	98.32	84.3	92.24	126.74	102.41	109.35	94.66	109.04	109.46	95.37	102.69	114.33	177	99.13	99.98	73.74	90.16	102.28	116.38	131.4	110.99	114.11	108.09	86.15	91.29
1411	ENSG00000064270.8	<ATP2C2>	0.86	1.03	0.88	0.24	0.19	1.47	1.55	2.44	0.76	0.09	2	0.42	0.69	0.28	0.48	0.39	0.27	1.29	1.18	0.31	0.2	0.32	0.32	0.58	0.29	0.11	0.3	0.25	0.52	0.31	0.32	1.03	0.13	0.54	0.26	1.31	0.86	0.85	0	0.07	2.13	1.45	0.1	0.02	3.28	1.2	0.75
1412	ENSG00000105675.4	<ATP4A>	0	0.58	0.07	0.07	0.09	0.14	0.09	0.04	0.19	0	0	0	0.21	0.07	0	0	0.18	0.48	0.09	0	0	0.07	0.04	0.05	0	0	0.19	0.16	0.29	0.05	0	0	0	0.03	0	0	0	0.21	0	0	0.32	0	0	0.13	0.09	0.15	0.53
1413	ENSG00000186009.4	<ATP4B>	0	0	0	0	0	0	0	0	0	0	0	0	0	0	0	0	0	0	0	0	0	0	0	0	0	0	0	0	0	0	0	0	0	0	0	0	0	0	0	0	0	0	0	0	0	0	0
1414	ENSG00000152234.11	<ATP5A1>	425.66	462.37	436.2	418.93	427.54	423.02	433.57	464.91	406.71	476.41	424.94	430.51	346.92	496.8	420.27	472.55	456.35	500.06	469.63	285.64	436.62	459.97	452.6	406.47	445.57	404.83	336.1	403.75	397.88	514.76	367.92	364.42	364.53	366.09	337.41	451.34	392.35	435.46	453.03	506.09	432.26	198.37	389.94	482.3	416.73	529.36	492.96
1415	ENSG00000110955.4	<ATP5B>	93.15	121.98	135.11	83.33	162.17	109.04	81.25	110.65	123.27	129.23	145.18	91.67	168.73	85.85	160.82	189.73	95.85	82.65	119.27	169.45	151.88	132.61	148.23	150.37	100.11	130.21	222.98	149.79	156.68	122.28	132.77	102.98	120.76	146.36	163.2	83.8	181.33	167.38	77.71	104.44	233.2	156.45	161.49	98.25	134.68	86.76	145.46
1416	ENSG00000165629.15	<ATP5C1>	142.1	119.3	104.64	107.18	132.91	104.26	106.98	178.61	85.02	126.42	155.16	116.16	92.88	97.99	128.29	134.92	130.33	141.05	119.82	124.38	137.07	152.82	129.04	121.31	126.04	116.63	62.01	98.08	121.46	172.61	205.06	142.04	145.38	131.07	97.45	112.19	115.31	135.9	116.38	147.74	145.18	103.64	89.74	208.6	126.14	152.86	140.97
1417	ENSG00000099624.3	<ATP5D>	165.76	207	196.05	167.14	153.17	137.86	192.63	229.42	192.32	187.73	220.99	147.46	174.29	150.82	182.66	152.99	178.86	164.83	195.06	180.25	289.26	144.39	156.1	228.77	143.77	200.8	199.74	226.78	215.48	171.61	317.78	234.65	155.56	205.21	166.97	139.62	160.09	237.05	160.51	215.07	245.96	172.89	205.4	208.87	188.83	200.71	209.94
1418	ENSG00000124172.5	<ATP5E>	22.96	68.54	43.81	61.96	23.8	77.24	45.89	59.78	59.92	38.43	39.97	13.54	24.78	14.4	24.77	31.9	55.51	47.55	18.13	33.15	75.42	33.16	44.49	67.36	33.7	44.31	28.82	26.73	13.67	48.77	54.63	5.73	5.71	27.44	46.76	36.11	17.17	202.55	70.31	35.14	36.38	13.31	9.55	18.24	17.58	11.63	35.61
1419	ENSG00000180389.6	<ATP5EP2>	0	0	0	0	0	0	0	0	0	0	0	0	0	0	0	0	0	0	0	0	0	0	0	0	0	0	0	0	0	0	0	0	0	0	0	0	0	0	0	0	0	0	0	0	0	0	0
1420	ENSG00000116459.6	<ATP5F1>	126.06	99.2	105.37	145.59	130.5	135.57	136.4	119.01	150.32	152.87	108.58	115	81.55	141.26	94.32	139.09	120.7	123.95	156.52	106.64	146.1	131.33	122.7	116.76	122.53	123.9	104.71	113.33	98.02	154.64	135.15	125.21	120.81	95.31	95.85	144.16	130.2	126.64	159.97	137.05	87.19	68.14	90	140.04	124.19	154.51	117.94
1421	ENSG00000159199.9	<ATP5G1>	129.8	149.63	103.54	109.02	148.03	102.22	87.78	124.78	97.82	107.87	120.29	96.43	62.23	106.31	92.92	139.72	123.11	155.91	134.88	102.75	129.46	115.93	124.7	117.31	40.63	97.18	104.85	165.76	91.4	114.66	211.17	89.01	96.54	83.02	75.19	127.44	97.97	142.99	102.38	120.91	105.83	111.8	79.53	147.58	105.54	127.06	113.37
1422	ENSG00000135390.13	<ATP5G2>	677.37	600.16	685.62	694.86	590.1	697.15	700.73	706.11	642.05	658.96	629.97	556.31	621.79	626.61	590.96	564.64	730.05	639.35	604.64	587.07	737.59	696.46	694.92	645.11	643.33	675.49	695.21	611.79	707.94	600.65	771.41	711.25	666.38	600.38	536.75	717.84	557.63	676.33	723.8	593.52	565.8	636.34	620.68	670.14	508.67	656.88	643.63
1423	ENSG00000154518.5	<ATP5G3>	280.31	332.76	313.38	342.23	341.04	369.46	313.12	342.7	288.79	303.48	352.08	270.07	219.21	314.7	273.84	329.18	317.99	307.06	300.39	256.71	454.54	305.64	293.84	319.49	277.42	316.38	261.41	269.4	276.06	321.09	352	291.55	257.55	273.89	227.81	340.09	270.43	369.11	355.44	333.12	278.27	190.73	248.82	348.09	248.21	307.02	343.78
1424	ENSG00000167863.7	<ATP5H>	25.96	21.46	27.59	20.81	28.94	34.93	19.58	17.2	29.14	24.9	29.34	21.7	33.7	29.61	30.59	31.99	22.75	23.57	33.42	24.05	24.71	49.36	24.8	20.53	25.8	29.49	32.32	23.07	20.38	22.4	29.76	17.47	22.69	32.48	38.45	21.21	27.14	23.84	18.72	19.54	46.01	39.55	25.09	19.43	26.5	22.29	26.04
1425	ENSG00000169020.5	<ATP5I>	78.09	133.14	136.74	89.04	75.02	57.22	148.46	83.53	123.78	117.21	98.61	98.6	125.63	69.81	89.03	84.57	105.05	71.47	77.16	159.31	113.65	69.08	107.82	99.44	113.28	116.43	125.58	86.21	113.25	74.45	85.17	62.95	88.89	92.01	152	78.37	86.95	141.11	111.66	60.67	92.11	160.82	84.56	61.54	87.67	68.01	79.05
1426	ENSG00000154723.8	<ATP5J>	65.95	62.17	80.85	50.81	61.66	56.09	61.47	70.25	65.5	63.79	62.61	102.12	53.5	45.3	54.66	45.89	64.35	56.93	52.97	63.85	74.45	69.59	63.67	61.03	57.84	71.18	72.29	90.91	56.61	65.27	78.31	53.92	59.36	51.06	80.74	74.9	58.14	62.36	49.29	63.32	43.37	68.01	58.28	86.71	44.49	70.9	85.22
1427	ENSG00000241468.3	<ATP5J2>	510.8	665.67	551.92	443.29	528.35	556.19	556.1	616.95	477.22	504.67	567.92	490.2	487.05	510.23	608.25	552.79	611.25	496.62	508.33	487.82	621.06	438.13	500.68	520.19	496.76	712.56	550.72	512.47	557.39	574.7	695.03	536.39	527.16	508.84	413.47	580.22	501.66	609.23	449.23	561.31	587.17	529.15	525.68	629.21	459.2	511.83	558.43
1428	ENSG00000248919.3	<ATP5J2-PTCD1>	0.47	0	2.22	2.61	0.49	0.86	1.3	0.7	0	1.13	0	0.94	1.5	0.83	0.32	0.41	0.96	2.06	0	0.8	1.51	1.8	0.64	2.47	0.52	0.71	0.61	2.79	0.79	0	1.78	0.31	1.7	1.76	2.2	1.05	1.05	0.99	0.94	3.01	3.25	0.36	0	0	0	2.16	0.49
1429	ENSG00000167283.3	<ATP5L>	215.6	284.38	244.39	228.14	267.75	267.46	245.9	317.72	264.78	259.24	201.58	217.27	212.96	271.89	210.16	277.07	259.18	224.7	239.84	265.85	368.9	276.48	263.83	288.84	250.66	354.58	270.19	243.96	247.04	267.03	360.83	283.51	219.44	283.05	255.63	248.76	230.64	343.88	234.01	245.68	249.25	201.12	250.16	355.04	247.09	254.65	277.57
1430	ENSG00000249222.1	<ATP5L2>	0	0	0	0	0	0	0	0	0	0	0	0	0	0	0	0	0	0	0	0	0	0	0	0	0	0	0	0	0	0	0	0	0	0	0	0	0	0	0	0	0	0	0	0	0	0	0
1431	ENSG00000241837.2	<ATP5O>	31.08	41.63	16.82	10.5	27.42	32.17	31.03	23.48	33.7	21.53	17.34	30.29	18.26	39.37	15.74	12.37	25.04	20.57	30.68	32.51	27.41	17.37	22.44	45.05	27.64	27.97	40.61	28.26	26.78	29.55	42.62	31.15	22.74	40.66	48.91	25.17	21.99	42.24	28.31	27.7	19.04	22.73	21.87	38.14	24.82	24.66	28.55
1432	ENSG00000125375.10	<ATP5S>	28.82	23.08	24.86	28.79	34.57	31.11	24.04	27.69	34.38	23.26	22.24	30.39	23.66	27.72	26.54	24.79	28.25	24.36	31.22	24.03	28.81	44.92	33.6	21.91	35.5	26.72	15.37	25.94	24.85	32.39	24.98	30.97	23.95	32.21	13.22	26.14	25.76	31.3	30.74	28.57	27.23	20.63	22.98	32.4	29.46	29.12	27.11
1433	ENSG00000105341.14	<ATP5SL>	30.85	25.24	19.11	45.35	33.06	31.25	21.14	37.68	36.85	41.07	46.84	19.67	27.21	35.36	35.12	51.6	49.85	31.99	26.43	36.23	28.79	28.6	33.08	40.41	32.85	17.89	51.39	21.04	26.35	45.77	61.32	25.2	38.33	40.48	47.64	31.86	33.07	41.85	36.2	36.68	34.54	25.02	33.28	43.36	32.49	36.88	29.56
1434	ENSG00000071553.12	<ATP6AP1>	13.48	16.26	18.01	13.55	27.28	9.32	14.43	13.67	11.5	18.58	22.75	11.19	20.46	13.19	21.27	14.95	12.59	15.61	17.77	16.97	8.78	29.68	14.92	11.05	15.48	6.25	6.66	8.8	15.25	17.06	18.88	18.73	16.03	16.93	10.4	10.12	21.28	16.61	15.38	17.89	17.2	11.38	18.02	16.18	17.07	18.43	15.43
1435	ENSG00000205464.7	<ATP6AP1L>	10.77	4.1	17.78	7.58	4.95	13.08	9.1	7.44	15.58	10.18	6.39	14.03	17.88	14.79	10.19	4.52	14.22	5.22	7.15	15.66	7.54	9	8.6	11.75	13.08	20.05	11.43	9.03	8.38	10.51	2.72	6.27	6.77	21.74	19.08	12.38	7.4	11.19	7.15	6.4	21.32	22.5	17.81	4.77	19.71	2.55	8.72
1436	ENSG00000182220.9	<ATP6AP2>	12.28	4.7	3.69	11.07	8.82	7.08	6.03	3.16	5.65	9.27	4.83	7.83	3.58	9.45	3.82	5.63	8.68	8.88	8.73	3.65	2.84	7.36	16.33	6.47	8.56	3.63	4.09	4.1	3.44	10.07	5.79	6.38	6.1	3.04	5.33	11.43	3.59	4.86	19.44	5.92	6.61	3.06	2.68	3.66	4.34	6.91	6.47
1437	ENSG00000033627.10	<ATP6V0A1>	99.65	93.23	119.52	96.81	110.4	127.11	121.09	98.88	110.92	97.8	114.01	97.34	96.23	110.64	104.98	107.68	92.17	112.73	104.79	114.25	70.19	116.07	83.66	99.41	104.51	113.35	77.66	104.78	110.4	95.11	124.25	62.34	88.6	103.22	96.12	105.63	118.44	110.74	77.38	107.05	130.78	90.82	137.29	93.16	133.63	96.04	89.53
1438	ENSG00000185344.9	<ATP6V0A2>	11.94	17.66	15.23	17.55	30.65	15.84	10.45	13.1	17.31	14.91	21.06	14.37	22.75	18.68	22.58	36.68	10.59	17.78	22.09	15.85	20.76	32.72	20.2	15.43	18.74	12.21	15.77	11.89	13.1	15.64	17.23	18.01	15.95	15.76	16.86	13.32	13.79	15.54	11.16	21.71	19.92	14.46	11.22	13.69	23.17	16.27	18.73
1439	ENSG00000105929.11	<ATP6V0A4>	0	0.31	0.05	0	0	0	0.04	0.11	0	0	0.18	0	0.03	0.11	0.12	0.04	0.02	0	0.04	0.03	0	0.07	0.11	0	0.13	0.15	0	0.18	0.09	0	0.15	0.04	0.68	0	0	0.02	0	0	0.3	0.24	1.43	0.03	0	0	0	0.22	0.11
1440	ENSG00000117410.9	<ATP6V0B>	190.39	205.48	191.37	160.36	157.75	174.51	127.97	167.66	152.89	166.48	150.17	157.02	184.34	156.18	155.54	166.82	169.68	146.16	176.4	254.07	132.03	131.46	151.89	163.12	137.72	182.64	173.35	166.43	155.26	161.48	289.85	174.74	154.96	150.22	208.08	157.8	165.58	151.39	183.82	170.56	149.68	162.49	147.69	165.31	197.48	162.79	162.1
1441	ENSG00000185883.6	<ATP6V0C>	19.07	87.05	55.65	25.69	75.27	35.7	92.2	85.83	65.11	46.56	102.5	71.4	83.39	82.58	92.45	64.78	120.6	105.17	75.6	26.6	50.7	41.03	73.96	31.05	48.54	55.9	38.55	83.42	67.23	99.74	131.08	125.32	93.45	22.53	72.32	54.42	21	36.3	71.59	100.97	17.28	54.71	56.37	61.86	36.64	118.63	40.96
1442	ENSG00000159720.7	<ATP6V0D1>	12.35	20.83	15.14	25.41	10.17	13.44	11.38	15.74	13.68	17.7	15.54	14.88	8.4	9.39	19.13	10.15	17.5	12.07	13.92	9.03	15.66	18.87	12.38	15.58	14.9	14.79	13.01	15.43	9.85	16.89	29.14	10.36	10.77	13.1	10.83	21.21	16.12	10.18	10.14	16.85	12.93	11.14	23.84	21.73	16.5	16.93	13.07
1443	ENSG00000147614.3	<ATP6V0D2>	0	0	0	0	0	0	0	0	0	0	0	0	0	0	0	0	0	0	0	0	0	0	0	0	0	0	0	0	0	0	0	0	0	0	0	0	0	0	0	0	0	0	0	0	0	0	0
1444	ENSG00000113732.4	<ATP6V0E1>	122.72	236.09	163.3	193.33	107.2	169.24	158.13	183.97	175.28	161.21	165.87	119.87	137.07	134.47	102.75	129.78	190.8	193.59	134.94	113.44	230.9	129.57	148.97	197.81	145.75	143	122.1	120.52	144.95	169.41	204.46	130.3	167.23	129.43	184.38	168.77	122.75	173.13	230.64	161.02	115.87	103.35	105.75	145.08	168	143.6	154.7
1445	ENSG00000171130.13	<ATP6V0E2>	172.57	81.74	160.09	77.63	210.14	125.33	246.01	52.71	169.7	96.16	82.56	188.5	133.16	145.31	185.81	103.03	130.96	143.12	135.68	226.22	38.43	73.57	103.51	97.43	112.29	127.13	97.86	146.46	140.77	137.3	85.23	145.99	94	128.81	114.63	135.57	103.52	112.39	120.09	140.82	127.37	109.57	188.32	127.09	122.66	105.1	84.01
1446	ENSG00000114573.5	<ATP6V1A>	1.02	0	1.1	0.14	2.83	0.82	0.29	0	0	0.18	0.73	0	0.89	0	1.5	0.87	0.25	0.33	0.6	0	0.27	0.96	0.18	0	0.36	0	0	0.65	0	0	0	0.15	0	0.93	0	0.47	1.12	0	0	1.54	0.82	0	0	0.11	0.48	0.81	0
1447	ENSG00000116039.7	<ATP6V1B1>	9.1	1.78	2.8	3.42	4.7	2.08	0.41	2.57	2.66	2.7	5.65	4.03	5.18	2.99	1.11	4.82	0.63	1.49	3.47	5.4	1.02	2.25	1.15	1.4	2.27	2.33	5.66	3.33	2.92	2.95	1.56	1.16	3.19	2.95	5.02	3.34	4.62	7.81	1.07	2.69	3.37	8.18	1.32	1.47	2.73	1.18	1.59
1448	ENSG00000147416.6	<ATP6V1B2>	19.89	20.16	26.34	21.12	31.65	25.37	19.2	23.59	32.36	23.46	19.66	27.62	20.17	24.35	26.05	14.79	23.38	27.72	21.95	26.13	16.94	26.88	21.44	21.4	27.01	16.81	27.31	24.33	19.41	19.69	20.18	21.6	28.82	32.71	45.53	16.23	26.25	26.9	16.32	18.29	32.52	25	31.1	26.82	42.7	29.93	28.44
1449	ENSG00000155097.7	<ATP6V1C1>	52.36	28.86	22.63	23.7	11.49	17.69	27.92	21.15	28.77	28.59	21.24	43.54	24.06	30.81	15.07	18.41	24.93	22.04	24.65	19.88	18.47	16.2	27.54	21.85	22.76	33.02	26.71	32.29	24.83	23.44	18.15	32.9	29.82	21.75	46.92	32.59	22.48	16.54	31.57	34.92	25.72	21.99	25.37	39.05	22.02	21.91	30.51
1450	ENSG00000143882.5	<ATP6V1C2>	4.9	4.92	7.09	3.85	4.89	4.93	5.6	4.43	6.07	4.68	6.81	7.32	6.23	5.58	6.33	7.9	5.45	3.61	6.44	13.76	4.44	5.2	7.46	7.51	5.87	7.29	10.13	6.03	7.86	4.6	11.93	3.59	4.67	10.51	12.75	3.56	6.16	8.75	3.3	5.19	10.26	9.45	6.69	4.66	7.3	3.96	7.4
1451	ENSG00000100554.7	<ATP6V1D>	65.55	53.49	32.21	32.43	39.29	38.37	37.43	40.84	31.66	24.09	16.19	54.71	31.51	42.64	27.02	40.23	40.12	34.63	45.69	30.96	48.63	26.79	42.05	38.96	42.88	35.11	31.42	33.71	32.18	26.88	42.21	30.84	50.41	36.02	60.31	29.64	37.29	38.16	70.35	52.13	36.11	33.69	35.88	28.64	43.85	51.15	40.52
1452	ENSG00000131100.8	<ATP6V1E1>	35.03	30.46	21.6	22.71	17.92	16.18	21.07	14.75	32.33	23.89	16.96	34.7	11.53	32.31	21.34	17.06	16.67	18.23	29.42	27.74	26.37	22.2	16.03	21.38	28.85	23.51	25.92	15.62	17.65	32.28	30.81	14.43	26.52	20.34	40.73	25.55	28.36	20.32	18	27.53	33.13	21.43	19.04	27.03	19.14	25.03	23.44
1453	ENSG00000250565.2	<ATP6V1E2>	13.13	8.79	5.37	8.41	6.92	12.9	10.88	4.46	11.63	8.98	4.27	13.62	5.44	8.48	12.1	5.08	10.79	5.2	10.75	7.86	8.92	8.05	8.33	6.6	8.22	8.21	7.31	10.76	9.97	10.26	5.72	5.95	7.21	8.66	8.37	7.82	8.63	11.59	8.59	10.24	7.16	6.84	10.25	8.51	13.95	7.51	6.78
1454	ENSG00000128524.4	<ATP6V1F>	0	2.12	0.51	1.88	1.88	2.38	2.23	1.03	0.86	2.82	1.07	4.05	0.93	1.27	1.86	2.77	1.48	2.99	2.65	0.67	4.39	1.68	1.72	1.31	0.77	2.58	2	0.53	2.62	1.27	4.56	2.25	2.77	0.64	1.03	2.38	1.22	2.02	2.08	1.89	1.43	0	1.67	3.01	0.71	0	0.84
1455	ENSG00000136888.6	<ATP6V1G1>	0.59	4.56	1.89	2.08	2.02	2.72	0.36	3.8	3.27	1.58	1.91	1.01	0.69	1.03	1.75	2.55	2.33	2.75	1.03	0.47	1.22	2.67	1.58	2.25	2.54	0	2.28	0	0.61	1.36	2.1	0	0.86	0.48	5.79	1.6	2.26	1.27	1.83	1.5	0.97	5.29	0	3.05	1.68	1.77	2.51
1456	ENSG00000213760.6	<ATP6V1G2>	4.81	4.79	0.84	3.17	1.44	5.64	2.27	2.48	4.96	2.09	2.74	5.02	6.9	10.94	4	4.39	2.76	5.16	1.38	6.3	2.33	5.32	2.81	5.33	4.72	1.45	6.53	3.8	2.35	8.06	2.81	4.31	1.2	3.14	4.55	3.76	7.09	0.38	4.3	1.37	2.93	6.28	3.9	3.88	3.81	4.77	2.69
1457	ENSG00000254870.1	<ATP6V1G2-DDX39B>	0	0	0	0	0.99	0.63	0	0	0.79	0.36	0	0.92	0	0.48	0.64	0.44	0.25	0.72	0.4	0	0	0	0.27	0.82	0	0.38	0	0.32	0.66	0	0	0	0.38	0	0	0	0	0	0	0.26	0.46	0	0	1.15	0	0	0.64
1458	ENSG00000151418.7	<ATP6V1G3>	0	0	0	0	0	0	0	0	0	0	0	0	0	0	0	0	0	0	0	0	0	0	0	0	0	0	0	0	0	0	0	0	0	0	0	0	0	0	0	0	0	0	0	0	0	0	0
1459	ENSG00000047249.12	<ATP6V1H>	82.07	80.17	69.74	70.64	69.05	66.79	59.76	75.54	65.2	67.75	77.52	67.2	58.67	85.7	75.03	64.45	74.96	70.38	90.96	63.09	75.29	68.09	79.58	76.7	67.55	83.59	60.49	71.91	63.84	90.22	55.96	85.73	97.9	62.72	61.01	66.47	70.29	85.73	84.18	92.62	61.57	49.03	69.05	79.26	76.38	93.71	82.71
1460	ENSG00000165240.13	<ATP7A>	4.52	4.72	4.99	3.58	5.21	5.23	4.07	5.02	6.81	4.43	3.43	5.5	5.58	6.64	5.45	3.66	4.47	3.85	5.97	7.01	6.98	5.54	5.33	5.13	6.81	5.9	3.97	7.26	6.03	5.46	5.78	4.48	5.86	6.17	5.67	4.91	7.72	4.7	3.39	4.27	6.65	5.87	6.48	7	5.39	4.9	4.69
1461	ENSG00000123191.9	<ATP7B>	6.39	4.01	3.61	7.78	4.96	3.57	7.91	2.55	8.71	4.71	8.97	5.71	11.41	7.72	5.29	4.25	8.1	8.02	10.26	7.87	5.28	7.2	4.57	7.64	6.23	6.18	5.02	5.61	7.1	5.33	3.77	4.57	3.38	8.85	6.63	8.38	6.89	7.27	4.35	4.75	8.9	4.91	6.24	6.32	8.63	4.94	4.75
1462	ENSG00000124406.12	<ATP8A1>	95.63	22.45	52.18	26.64	54.64	36.09	43.28	22.41	68.59	51.08	32.1	110.67	74.33	103.68	79.94	26.51	55.84	35.71	64.27	113.68	32.56	48.41	64.03	45.14	54.98	77.79	54.34	56.25	41.08	45.17	12.64	44.09	37.47	78.17	106.47	41.13	62.87	47.08	28.21	45.14	67.67	83.83	59.85	58.05	64.47	38.36	35.1
1463	ENSG00000132932.12	<ATP8A2>	0.63	0.54	0.49	0.2	0.92	1.2	0.79	0.11	2	0.32	0.2	1.04	0.4	0.35	0.72	0.35	0.72	0.24	0.2	0.47	0.11	0.55	0.44	0.45	0.34	0.24	0.33	1.42	1.08	0.51	0.36	0.57	0.09	0.55	0.41	0.69	0.54	0.54	0.63	0.35	0.8	0.53	0.87	0.24	0.64	0.72	0.13
1464	ENSG00000081923.6	<ATP8B1>	1.22	1.62	3.03	3.17	2.8	6.11	4.34	4.46	2.15	1.31	0.62	0.65	4.41	5.49	1.93	0.79	0	2.58	3.74	3.24	0	2.25	1.71	5.91	0.97	3.28	16.67	4.4	5.81	2	1.22	0.9	2.19	1.42	4.66	3.44	0.51	6.27	3.02	2.47	6.32	2.22	13.56	1.63	0.43	0.59	5.5
1465	ENSG00000143515.12	<ATP8B2>	55	90.8	79.49	129.69	58.84	90.98	48.59	105.14	66.76	93.84	104.8	52.55	70.66	92.56	57.5	71.32	72.07	114.59	74.31	49.23	79.08	71.41	61.31	100.13	80.53	63.83	60.63	79.69	78.72	77.92	83.22	58.47	89.47	66.23	69.21	64.96	94.77	55.03	99.86	87.79	79.93	57.68	78.78	82.49	103.22	111.86	107.98
1466	ENSG00000130270.12	<ATP8B3>	2.96	2.2	4.64	2.59	1	3.73	2.76	1.43	4.64	2.7	2.18	3.41	2.93	4.73	2.76	0.92	2.81	1	2.45	2.72	2.17	1.4	1.95	1.43	1.82	4.95	2.67	4.52	4.22	2.47	3.9	3.26	3.96	5.1	4.52	3.2	3.32	4.48	1.36	2.95	4.09	3.72	6.17	2.45	2.55	1.66	0.49
1467	ENSG00000104043.10	<ATP8B4>	11.29	6.88	10.12	7.56	12.73	24.71	15.96	9.88	18.08	14.32	5.37	12.56	15.08	15.17	16.46	14.51	6.59	4.98	11.27	13.2	11.87	15.19	8.39	12.68	9.48	9.99	17.16	13.9	15.07	4.87	5.85	13.05	9.35	8.35	13.99	14.59	17.01	22.39	5.83	9.39	31.48	11.62	21.01	5.81	10.65	9.47	16.29
1468	ENSG00000054793.9	<ATP9A>	13.16	6.45	7	15.54	9.01	12.81	9.08	12.82	5.47	8.11	4.63	10.62	8.42	8.53	7.46	6.74	8.98	13.86	4.3	4.05	3.37	8.29	5.63	8.56	9.23	3.98	3.88	7.94	7.79	8.93	1.28	4.53	9.82	2.23	4.88	13.2	12.86	4.39	15.88	11.34	4.06	1.93	8.36	6.48	10.26	8.82	14.74
1469	ENSG00000166377.15	<ATP9B>	55.8	52.01	57.03	41.6	45.36	41.2	51.2	44.28	63.53	42.98	56.95	60.68	44.3	50.13	56.81	43.53	43.12	46.75	57.32	59.37	35.11	50.14	47.35	43.89	51.52	49.37	42.36	49.8	51.81	49.59	43.62	51.19	50.94	43.56	54.74	48.98	44.27	45.13	53.96	49.28	60.09	42.82	54.71	40.89	54.58	51.26	42.3
1470	ENSG00000123472.8	<ATPAF1>	63.51	58.64	54.51	51.64	51.59	66.88	56.68	51.88	64.07	59.6	50.78	76.46	60.39	72.42	50.73	47.96	62.33	55.05	53.17	66.55	66.26	56.24	64.97	63.8	58.44	73.16	48.26	74.55	57.51	71.38	67.19	64.9	53.77	56.53	69.86	66.14	66.75	73.95	69.74	86.85	72.41	58.26	70.99	54.19	69.36	69.16	55.33
1471	ENSG00000171953.11	<ATPAF2>	47.31	33.81	35.73	30.15	30.8	39.23	38.58	30.57	34.42	34.58	37.2	43.13	46.57	36.13	30.49	40.89	37.16	29.58	45.6	43.29	30.34	26.19	35.07	31.25	32.76	36.12	46.89	42	43.54	31.55	37.19	38.19	30.72	41.26	41.51	36.68	31.71	38.74	29.1	38.31	45.65	48.9	43.77	32.15	33.75	27.36	35.39
1472	ENSG00000130770.13	<ATPIF1>	83.49	35.22	78.4	51.55	72.33	70.07	75.27	38.41	80.71	70.22	60.2	93.4	127.09	56.07	64.98	47.94	66.43	53.37	85.82	79.96	41.62	65.14	56.02	67.54	74.45	88.13	115.2	64.49	42.23	59.46	34.47	46.47	35.5	89.21	103.74	72.57	62.33	78.64	45.97	68.2	118.3	135.6	81.49	52.33	59.31	55.29	64.91
1473	ENSG00000175054.10	<ATR>	31.03	56.86	43.6	32.06	39.02	34.89	37.57	45.03	45.15	42.08	48.94	44.23	39.99	35.15	51.55	53.56	44.02	36.65	59.57	53.71	60.14	38.54	48.52	52.02	42.6	48.86	59.29	40.91	46.35	48.3	71.28	45.27	53.2	49.62	53.45	32.55	49.89	56.16	27.35	49.35	60.57	54.06	48.93	50.53	55.43	35.79	38.91
1474	ENSG00000138085.12	<ATRAID>	263.88	294.71	282.87	258.94	306.19	285.59	320.29	295.32	312.64	244.47	262.92	269.17	261.4	325.25	279.62	220.39	286.15	317.18	276.9	282.08	282.39	314.65	282.81	245.35	305.55	272.22	213.09	282.27	308.53	308.45	183.88	328.64	297.67	280.44	201.05	370.79	316.97	304.01	352.01	325.79	245.08	239.9	279.75	305.38	260.39	359.1	242.36
1475	ENSG00000164053.13	<ATRIP>	15.14	10.51	14.91	17.41	17.73	18.12	12.43	11.61	12.98	14	18.37	15.43	12.01	18.77	7.37	7.99	11.06	13.23	13.14	18.6	13.95	12.34	20.98	19.39	8.9	19.26	16.77	8.01	14.93	15.31	6.15	13.79	16.41	21.67	16.12	11.87	16.99	13.59	16.17	13.73	11.55	19.16	9.57	15.16	21.16	13.66	14.72
1476	ENSG00000088812.13	<ATRN>	5.91	7.62	6.2	14.15	15.09	15.59	9.1	8.52	11.1	6.67	11.15	4.98	2.51	17.17	8.89	8.88	6.39	12.64	9.97	3.46	8.43	24.99	4.41	4.72	6.96	4.97	2.6	4.93	5.06	12.44	3.15	7.28	7.12	4.98	1.67	16.3	5.42	10.98	10.84	13.84	4.5	1.27	4.29	7.32	5.92	17.47	5.88
1477	ENSG00000107518.12	<ATRNL1>	0.09	0.02	0.23	0.13	0.92	0.22	0.43	0.02	0.51	0.02	0.02	0.09	0	0.04	0.37	0.09	0.18	0.53	0.09	0.03	0.05	0.18	0.04	0.18	0.11	0.11	0.07	1.37	0.47	0.13	0.06	0.07	0.07	0.02	0.26	0.22	0.35	0.23	0.04	0.07	0.95	0.07	0.8	0.15	0.02	0.06	0
1478	ENSG00000085224.16	<ATRX>	34.2	32.59	29.63	22.02	40.22	30	28.76	37.81	32.1	25.67	15.76	45.54	27.1	33.91	32.18	25.57	27.84	30.72	28.64	38.67	23.77	35.99	31.45	30.05	31.95	25.75	21.66	34.13	31.16	28.15	23.03	27.7	34.88	25.73	33.29	36.79	38.04	29.55	24.14	27.46	29.45	27.99	43.87	43.1	28.63	28.4	31.82
1479	ENSG00000124788.13	<ATXN1>	25.23	15.18	20.58	14.39	22.72	25.93	17.67	16.3	19.91	20.73	12.07	30.43	23.87	19.94	18.83	10.6	17.37	15.33	17.95	26.42	12.02	15.6	19.63	16.01	15.6	17.23	18.44	21.42	25.29	20.15	7.59	10.86	15.06	16.52	25.78	20.83	27.56	25.63	13.76	17.96	31.9	20.44	30.51	16.63	21.57	16.34	18.14
1480	ENSG00000130638.11	<ATXN10>	69.34	159.55	96.19	136.74	113.89	129.72	130.9	111.61	155.47	96.52	123.75	74.69	87.16	84.12	117.59	79.94	87.32	87.06	61.24	125.93	125.18	92.53	139.54	138.2	98.91	108.45	68.51	100.25	92.53	129.91	129.54	72.02	80.69	100.23	106.26	138	91.65	162.66	134.95	97.85	108.85	53.27	96.58	87.9	86.55	94.89	76.57
1481	ENSG00000224470.3	<ATXN1L>	0	2.63	2.96	1.88	1.64	3.58	0.74	2.98	1.86	0	2.63	4.08	1.55	1.01	1.22	0.57	2.31	2.25	3.56	0.55	0.35	0.71	3.61	2.19	2.14	1.63	1.67	1.31	3.14	1.93	0.81	3.87	5	1.11	4.11	1.8	3.34	0.52	1.75	2.65	2.69	1.1	2.74	4.87	2.53	1.59	0.93
1482	ENSG00000204842.10	<ATXN2>	107.3	119.06	126.59	112.48	118.27	123.61	109.36	125.83	124.06	109.81	116.82	133.5	129.72	119	98.32	92.84	122.43	112.08	123.87	163.26	81.48	99.94	119.43	116.62	104.96	113.11	134.71	135.12	141.52	90.02	90.46	89.18	113.14	132.09	146.43	117.08	115.66	96.85	106.05	98.61	135.45	121.19	143.49	101.91	121.63	94.72	130.91
1483	ENSG00000168488.14	<ATXN2L>	214.06	232.11	213.25	211.06	206.74	223.95	204.4	240.34	232.49	215.22	263.78	227.01	267.46	192.8	233.27	239.85	224.23	218.8	220.85	270.45	179.78	226.13	205.58	221.93	209.99	218.08	242.19	236.72	235.68	162.68	354.57	193.3	245.05	257.34	233.34	211.59	187.94	175.68	162.52	200.86	278.5	265.29	283.55	237.42	244.35	197.12	229.69
1484	ENSG00000066427.17	<ATXN3>	46.61	26.03	30.46	28.05	24.85	36.7	30.49	33.31	31.11	31.09	20.66	40.69	35.5	37.83	21.61	23.96	25.37	28.67	29.06	47.74	27.43	27.48	38.78	34.59	37.15	28.72	35.76	35.94	31.88	31.41	18.94	26.75	41.82	28.53	45.41	21.86	34.44	28.72	23.38	25.03	32.31	40.08	27.44	34.03	33.41	23.33	43.27
1485	ENSG00000123594.3	<ATXN3L>	0	0	0	0	0	0	0	0	0	0	0	0	0	0	0	0	0	0	0	0	0	0	0	0	0	0	0	0	0	0	0	0	0	0	0	0	0	0	0	0	0	0	0	0	0	0	0
1486	ENSG00000163635.13	<ATXN7>	37.67	31.04	51.65	37.51	58.42	33.73	45.39	35.59	29.27	34.85	37.36	49.99	54.78	49.61	38.94	34.26	33.27	31.11	40.02	44.88	23.79	43.22	35.04	29.89	42.61	22.71	32.14	37.13	49.83	32.59	13.71	33.7	32.67	36.11	42.81	31.61	35.14	38.65	20.84	35.05	43.81	30.77	51.49	31.19	47.54	33.79	39
1487	ENSG00000146776.10	<ATXN7L1>	26.32	13.95	17.92	22.38	14.29	13.89	17.22	10.43	16.18	20.42	18.61	22.16	17.23	24.75	16.85	14.27	21.54	22.1	29.77	12.46	13.13	18.71	22.72	20.87	23.37	14.02	29.21	17	17.87	17.28	10.01	23.13	14.91	15.6	17.82	14.45	11.64	17.18	20.32	19.33	16.21	17.1	18.94	18.45	23.54	21.52	17.78
1488	ENSG00000162650.11	<ATXN7L2>	21.56	14.22	14.58	9.61	12.59	16.99	12.9	12.57	23.09	14.19	8.88	19.14	22.68	12.94	13.03	15.47	13.42	10.56	9.35	17.49	13.42	12.19	14.23	11.79	12.14	16.24	15.96	16.5	16.4	11	33.29	13.01	9.49	24.73	25.88	19.43	18.48	9.98	8.63	13.3	23.81	27.12	17.79	18.06	12.87	9.78	11.25
1489	ENSG00000087152.11	<ATXN7L3>	47.63	58.73	37.95	67.75	47.58	32.96	30.87	59.69	46.57	58.83	58.75	40.96	31.08	35.19	43.16	50.4	34.6	49.83	33	33.46	40.05	35.78	29.83	46.05	45.91	24.65	41.41	39.67	36.81	45.63	69.68	46.47	44.95	34.59	28.96	38.64	39.75	40.29	55.62	42.67	39.72	39.58	54	47.05	39.58	54.15	48.27
1490	ENSG00000253719.2	<ATXN7L3B>	0	0	0	0	0	0	0	0	0	0	0	0	0	0	0	0	0	0	0	0	0	0	0	0	0	0	0	0	0	0	0	0	0	0	0	0	0	0	0	0	0	0	0	0	0	0	0
1491	ENSG00000148090.7	<AUH>	55.19	43.37	47.79	46.88	56.68	44.48	44.34	56.53	58.55	49.91	39.85	54.32	65.67	67.59	51.1	44.49	51.07	49.2	55.74	56.1	40.47	49.59	67.42	53.96	66.85	48.23	57.1	55.27	50.12	49.3	26.44	60.44	59.68	47.9	66.15	43.33	59.88	53.06	46.1	42.25	53.05	78.58	46.8	53.35	61.58	63.06	48.53
1492	ENSG00000127423.6	<AUNIP>	0.25	0.34	0	0.18	0.35	0.09	0.45	0	0.14	0	0.09	0.34	0.36	0.09	0.51	0	0.2	0	0.29	0.55	0.15	0.65	0.32	0.18	0	0	0.95	0.02	0.5	0.4	0.47	0.77	0.66	0	0	0.36	0.38	0.7	0.26	0.83	0	0	0.54	0	0.28	0.35	0.04
1493	ENSG00000115307.12	<AUP1>	233.43	294.1	233.68	202.08	280.21	199.16	189.2	277.28	245.22	273.37	311.66	250.24	353.8	196.74	243.92	269.87	242.92	190.42	234.01	269	201.93	168.77	284.96	263.29	223.25	317.59	431.14	257.16	214.46	193.02	346.05	212.66	237.64	318.44	476.43	208.14	253.58	271.64	160.86	216.98	309.24	440.28	292.75	247.28	236.92	156.86	293.78
1494	ENSG00000087586.13	<AURKA>	3.72	2.9	2.66	1.1	2.8	2.97	1.86	3.45	2.43	2.09	1.65	2.74	1.69	4.28	1.72	2.01	1.93	2.34	2.07	0.52	2	1.63	3.11	1	2.63	2.71	1.7	2.21	1.78	2.44	3.15	2.78	1.57	2.8	2.6	2.91	2.33	2.47	1.07	3.01	3.29	0.19	1.95	2.32	1.7	1.61	3.08
1495	ENSG00000175756.9	<AURKAIP1>	151.5	166.09	119.62	110.16	127.74	131.66	140.23	179.18	149.3	144.32	192.5	152.37	115.2	107.02	142.17	181.9	138.38	148.65	147.44	144.64	195.5	100.05	121.01	164.3	127.81	195.72	148.64	134.79	122.32	124.4	361.11	155.2	133.4	154.45	138.71	140.4	84.76	118.16	114.48	186.13	111.86	121.41	132.2	203.05	158.98	148.11	159.26
1496	ENSG00000178999.8	<AURKB>	199.53	41.82	105.85	57.81	117.93	100.39	151.69	55	93.41	104.6	69.18	200.03	79.01	128.87	133.26	70.21	122.21	79.96	94.24	224.44	24.51	80.17	60.87	69.15	86.42	152.18	63.61	92.94	67.93	125.31	6.53	98.01	42.78	134.63	108.26	149.43	125.6	101.76	103.23	133.75	133.91	26.72	121.22	64.83	118.64	101.32	61.14
1497	ENSG00000105146.8	<AURKC>	3.02	3.83	3.03	4.02	9.07	2.02	4.92	3.99	3.41	4.48	4.83	3.69	3.05	2.68	4.93	5.22	2.85	8.03	3.7	2.75	2.62	3.59	3.25	4.72	3.48	7.31	3.48	3.52	3.32	3.24	1.09	6.8	3.19	4.06	2.75	4.34	3.67	4.79	5.61	2.02	6.15	3.27	5.49	2.93	2.25	7.71	3.48
1498	ENSG00000158321.11	<AUTS2>	53.25	43.41	81.01	65.9	93.47	52.51	96.65	40.22	56.25	48.74	60.43	88.05	54	56.91	91.15	87.99	55.19	48.36	61.06	84.96	22.13	64.82	53.87	57.66	72.99	25.79	29.91	82.08	82.03	65.7	13.46	29.79	44.99	47.17	41.99	67.85	112.86	77.8	33.62	53.06	86.35	46.24	88.06	45.97	55.66	60.12	47.58
1499	ENSG00000169857.3	<AVEN>	1.85	0	0	0	0	0	0	0.68	0	1.26	0	0.71	0.95	0	0.9	0	0	0	2.6	4.84	0	0.64	0.53	0	0.59	0	0	0	0	0	0.47	0	0	0	0	0	0.54	0	0	0	0	0	0	0	0	1.33	0
1500	ENSG00000135407.6	<AVIL>	14.56	6.37	10.98	11.38	9.61	14.21	14.3	7.92	17.76	13.12	21.75	12.33	11.32	16.84	14.41	6.5	20.82	14.65	11.02	12.04	8.72	10.66	13.32	9.76	23.73	13.41	11.49	13.29	9.96	8.51	8.46	6.58	13	17.05	17.01	9.03	15.33	15.91	4.59	16.38	15.15	23.12	8.36	13.32	16.91	9.72	7.94
1501	ENSG00000105778.13	<AVL9>	12.44	14.01	12.15	7.94	12.11	7.65	3.31	11.26	14.69	10.94	10.98	7.4	7.95	10.72	15.53	13.53	5.68	4.75	9.22	6.71	13.46	9.02	12.06	9.58	9.8	17.35	18.67	14.3	13.63	8.95	15.19	13.25	12.14	20.58	10.9	8.85	14.93	15.25	7.82	14.66	23.94	15.2	5.44	8.12	11.43	8.23	12.94
1502	ENSG00000101200.5	<AVP>	0	0	0	0	0	0	0	0	0	0	0	0	0	0	0	0	0	0	0	0	0	0	0	0	0	0	0	0	0	0	0	0	0	0	0	0	0	0	0	0	0	0	0	0	0	0	0
1503	ENSG00000119986.6	<AVPI1>	0	0	0	0	0	0	0	0	0	0	0	0	0	0	0	0	0	0	0	0	0	0	0	0	0	0	0	0	0	0	0	0	0	0	0	0	0	0	0	0	0	0	0	0	0	0	0
1504	ENSG00000166148.2	<AVPR1A>	0	0.85	0.49	0.38	0	1.09	1.08	0.96	0	0	0	0	0	0	0.6	1.05	0.36	0.41	0	0	0.36	0.57	2.59	0.94	0	0	0.44	0	1.42	0	0.53	0	2.28	0	0	0.8	0.49	2.91	0.55	0	2.52	0.24	0	0	0.43	0	0
1505	ENSG00000198049.5	<AVPR1B>	0	0	0	0	0	0	0	0	0	0	0	0	0	0	0	0	0	0	0	0	0	0	0	0	0	0	0	0	0	0	0	0	0	0	0	0	0	0	0	0	0	0	0	0	0	0	0
1506	ENSG00000126895.9	<AVPR2>	5.05	3.35	10.15	7.82	5.02	8.1	10.34	9.59	10.89	12.25	6.5	4.97	5.25	4.95	0.76	5.59	10.12	3.43	10.67	10.43	7.41	3.61	3.73	5.02	3.03	11.25	7.69	11.5	5.54	5.06	16.46	5.77	8.52	5.39	2.75	9.31	5.27	10.11	6.56	3.82	9.68	0.26	6.67	10.96	3.53	13.81	15.71
1507	ENSG00000204195.3	<AWAT1>	0	0	0.09	0.24	0	0	0	0	0	0	0	0	0	0	0	0	0	0	0	0	0	0	0	0	0	0	0	0	0	0.25	0	0	0	0	0	0	0	0.17	0	0	0	0	0	0	0.39	0	0
1508	ENSG00000147160.5	<AWAT2>	0	0.23	0	0	0	0	0	0	0	0	0	0.16	0	0	0	0	0.2	0	0.18	0	0	0	0.2	0	0	0	0.12	0	0	0	0	0	0	0.29	0	0.25	0	0.17	0	0	0	0	0	0	0	0	0
1509	ENSG00000162779.16	<AXDND1>	0.07	0.49	0.42	0.04	1.46	1.06	0.43	0.11	0.14	0.67	0.56	0.23	1.17	0.62	1.11	0	0.96	0.44	1.18	1.59	0.04	0.71	1.76	0.98	0.36	0	1.28	0.65	0.45	0.15	1.13	0.18	0	0.19	0.15	0.65	0.93	0.37	1.53	0.17	1.91	1.39	1.43	0	0	1.15	0.13
1510	ENSG00000103126.10	<AXIN1>	20.45	21.1	20.88	23.74	26.98	22.94	23.7	28.81	19.28	17.85	24.94	21.61	26.54	19.67	22.9	22.98	20.4	28.51	18.82	19.73	14.68	25.94	24.91	17.65	27.37	23.53	12.98	17.95	24.2	18.22	23.59	17.12	18.05	26.21	25.81	23.95	20.51	23.31	16.76	24.36	23.13	21.07	23.37	22.37	16.31	23.46	21.7
1511	ENSG00000168646.8	<AXIN2>	4.88	7.35	3.57	5.36	9.42	5.66	8.97	4.79	3.54	5.04	7.48	7.95	3.73	3.58	7.09	4.23	3.86	7.11	4.94	4.9	2.93	5.78	7.46	5.97	5.42	2.95	3.35	7.56	4.07	6.67	0.94	4.39	3.76	6.65	6.87	7.18	4.51	2.74	9.18	8.68	5.61	1.64	3.69	11.02	6.54	9.08	2.79
1512	ENSG00000167601.7	<AXL>	7.06	1.85	4.29	10.5	6.18	8.12	6.47	7.35	4.22	3.8	3.7	5.97	1.62	4.39	2.16	4.95	7.02	6.8	6.43	4.55	1.75	4.99	3.16	4.75	5.39	1.91	4.48	3.1	2.85	4.62	6.68	5.47	3.87	2.61	8.3	10.83	3.94	1.97	5.9	4.97	4.16	0.98	4.23	4.53	6.38	2.63	8.94
1513	ENSG00000160862.8	<AZGP1>	123.73	63.57	50.13	51.86	55.27	50.86	65.31	69.61	78.69	91	93.24	131.57	171.93	86.8	111.01	62.82	119.61	66.91	119.75	200.98	47.32	61.32	123.01	129.82	96.98	110.31	204.01	86.65	84.4	85.47	86.15	48.83	78.89	178.55	155.26	63.88	78.63	74.61	61.44	152.28	212.42	193.88	102.73	151.28	124.2	55.37	118.85
1514	ENSG00000141577.9	<AZI1>	29.02	21.01	28.36	19.38	20.24	30.8	30.74	17.31	38.52	22.83	29.16	26.52	35.74	35.12	37.2	16.76	27.71	25.93	23.43	31.16	22.47	30.83	29.03	19.21	27.77	30.46	22.55	33.78	32.72	25.6	26.93	31.15	22.08	41.05	25.85	32.7	19.65	32.65	29.1	18.2	38.43	29.15	36.42	20.3	22.83	29.6	24.54
1515	ENSG00000163512.9	<AZI2>	73.87	99.83	53.84	96.54	73.88	61.74	60.17	93.05	63.6	89.57	107.62	65.24	69.95	72.38	64.14	130.08	91.13	93.49	69.1	45.73	93.49	77.32	81.25	96.58	69.26	52.61	83.23	64.25	49.22	81.43	73.87	59.72	87.46	50.18	76.07	61	62.59	60.31	87.24	93.92	51.31	80.09	68.29	74.1	82.05	72.28	99.28
1516	ENSG00000155096.9	<AZIN1>	34.98	30.97	19.55	17.03	14.06	21.11	20.5	19.44	23.58	20.64	11.64	48.19	11.62	18.09	8.42	12.04	24.43	34.19	27.06	12.3	15.54	13.97	35.69	14.55	29.41	14.48	22.48	24.52	14.51	28.53	14.65	19.72	19.79	17.62	61.27	15.05	16.45	13.33	44.76	24.47	14.13	23.57	20.68	40.77	18.88	15.34	24.76
1517	ENSG00000172232.5	<AZU1>	0.2	0.32	0.14	0.24	4.07	0.36	0.36	0.68	0.33	0.32	1.07	0.25	0.12	0.9	2	1.13	0.25	0.52	0.82	0.52	0.35	6.99	0.84	0.27	0.81	0.13	0.07	0.16	0.39	0.78	0.39	0.85	1	0.4	0.05	0.05	0.19	0.54	0.07	0.63	0.41	0.09	0.28	0.19	0.37	0.5	0.13
1518	ENSG00000166710.13	<B2M>	5772.33	5282.73	7668.02	4464.03	7560.26	7905.01	7815.74	5083.47	7759.18	5173.36	4420.49	8979.09	5089.43	10181.5	6080.31	5577.8	6140.09	5020.04	6422.88	8424.79	5795.08	6911.45	7241.61	6300.31	7006.39	7125.71	6571.51	5572.69	7502.69	6315.02	11757.9	9252.62	7948.33	5375.76	6198.15	8698.63	6390.96	8605.39	4441.76	4383.88	6560.6	5608.27	6117.75	7458.06	4509.67	6083.6	5096.5
1519	ENSG00000169255.9	<B3GALNT1>	8.98	2	13.22	4.31	9.77	12.4	8.47	5.84	9.48	4.28	4.45	8.59	12.84	6.4	6.9	6.02	5.07	7.32	1.52	2.56	8.52	12.65	5.86	8.83	4.92	6.6	6.48	15.43	9.76	4.73	4.09	10.69	5.99	8.55	5.36	15.7	14.28	5.05	9.52	8.37	4.23	3.34	10.72	6.04	5.8	10.52	2.47
1520	ENSG00000162885.8	<B3GALNT2>	17.29	10.12	16.14	14.67	16.99	21.09	14.35	13.52	14.4	16.68	11.89	17.79	11.89	18.7	17.7	15.75	10.43	13.75	18.22	18.31	9.85	23.4	18.26	15.47	15.46	5.66	14.07	18.81	20.25	14.91	13.39	12.77	16.01	15.58	13.56	15.14	25.83	8.94	12.23	18.5	29.6	8.35	15.86	18.52	13.21	14.92	15.94
1521	ENSG00000172318.4	<B3GALT1>	1.56	1.01	1.12	0.69	1.37	0.93	0.74	0.59	1.3	0.79	0.76	1.17	1	0.86	1.73	1.83	1.06	0.48	1.23	1.76	1.15	1.27	1.35	0.94	0.77	0.73	0.3	1.16	0.97	1.15	0.92	0.63	0.86	0.85	1.46	1.45	1	0.63	0.9	1.02	0.95	0.71	2.56	1.1	0.97	1.2	1.41
1522	ENSG00000162630.5	<B3GALT2>	0	0	0	0	0	0	0	0	0	0	0	0	0	0	0	0	0	0	0	0	0	0	0	0	0	0	0	0	0	0	0	0	0	0	0	0	0	0	0	0	0	0	0	0	0	0	0
1523	ENSG00000235863.2	<B3GALT4>	3.02	1.21	2.52	0.92	3.47	3.57	2.76	1.51	3.15	1.39	2	2.31	1.67	3.5	2.72	3.86	2.04	1.7	1.05	2.79	1.22	3.38	2.79	2.47	3.12	3.15	1.44	2.31	2.71	1.49	0.88	2.38	2.57	1.64	1.77	1.42	1.52	3.71	2.31	3.65	1.67	2.53	0.96	2.25	3.28	3.62	1.21
1524	ENSG00000183778.13	<B3GALT5>	0.02	0	0.11	0	0.14	0.04	0.07	0.04	0.09	0.04	0.02	0.11	0.21	0.07	0.02	0.02	0.07	0.04	0.04	0	0.02	0.11	0.02	0	0.02	0.26	0.05	0.14	0.11	0.04	0.02	0	0.04	0.07	0.05	0.16	0.02	0.07	0.02	0.02	0.03	0.12	0.05	0.06	0.07	0.07	0.09
1525	ENSG00000176022.3	<B3GALT6>	0	0	0	0	0	0	0	0	0	0	0	0	0	0	0	0	0	0	0	0	0	0	0	0	0	0	0	0	0	0	0	0	0	0	0	0	0	0	0	0	0	0	0	0	0	0	0
1526	ENSG00000187676.7	<B3GALTL>	0	0	0.19	0.18	0.44	0.25	0	0	0	0	0	0	0	0	0	0	0.18	0	0	0	0	0.12	0	0	0.14	0	0	0	0	0	0	0.39	0	0	0	0.16	0	0	0	0	0	0	0	0	0.23	0	0
1527	ENSG00000109956.8	<B3GAT1>	95.83	33.2	46.67	22.06	54.37	31.81	75.16	25.04	44.18	35.21	44.35	129.56	48.46	24.62	73.22	26.53	36.66	58.93	31.51	100.81	14.72	15.83	68.79	33.39	40.49	43.98	33.67	59.72	44.7	45.14	16.31	34.05	26.56	33.5	104.22	77.12	52.32	19.83	45.03	43.95	54.82	35.76	62.75	60.43	43.46	41.52	23.83
1528	ENSG00000112309.6	<B3GAT2>	0	0	0	0	0	0	0	0	0	0	0	0	0	0	0	0	0	0	0	0	0	0	0	0	0	0	0	0	0	0	0	0	0	0	0	0	0	0	0	0	0	0	0	0	0	0	0
1529	ENSG00000149541.5	<B3GAT3>	33.18	37.68	42.66	28.05	26.44	34.05	16.12	23.2	28.46	21.14	51.19	12.17	28.84	17.78	35.68	46.54	18.56	45.56	20.31	32.62	34.44	44.34	21.21	36.09	32.97	20.8	49.98	18.67	29.29	21.75	36.75	22.08	18.4	31.71	44.07	28.5	25.56	35.81	26.22	45.79	23.57	44.45	20.06	23.98	41.66	23.98	17.89
1530	ENSG00000174684.6	<B3GNT1>	0	0	0	0	0	0	0	0	0	0	0	0	0	0	0	0	0	0	0	0	0	0	0	0	0	0	0	0	0	0	0	0	0	0	0	0	0	0	0	0	0	0	0	0	0	0	0
1531	ENSG00000170340.10	<B3GNT2>	0	9.06	4.83	3.85	6.97	0.95	5.64	1.18	0	1.53	0	0	2.63	0.37	0	2.22	0	6.97	0	0	0	0	0.41	0	0	0	0	10.33	0	10.11	0	0	0	3.7	0	11.21	0.37	0.1	13.66	4.34	6.48	2.79	13.33	2.56	8.86	9.35	2.88
1532	ENSG00000179913.6	<B3GNT3>	0	0	0.05	0.16	0	0	0	0	0	0.09	0.02	0	0	0.2	0	0	0	0.09	0.11	0	0	0	0.3	0.34	0.07	0.37	0.61	0	0	0.31	0.04	0.44	0.2	0	0	0	0.09	0	0	0	0.07	0	0	0	0.02	0	0
1533	ENSG00000176383.8	<B3GNT4>	0.09	0.23	0.74	1.1	1.06	0.88	1.03	1.71	2.78	0.49	0.71	1.17	1.48	1.78	2.39	4.1	0.79	1.05	0.94	2.34	0.91	3.01	0.96	1.07	1.73	0.64	0.3	2.33	1.54	2.11	3.3	0.5	1.44	1.87	0.76	0.51	1.24	1.52	0.74	0.72	1.09	1.48	1.29	1.15	1.54	1.24	0.73
1534	ENSG00000176597.7	<B3GNT5>	2.28	1.94	2.49	3.46	7.11	1.34	5.98	1.41	3.54	4.71	3.49	4.35	4.15	4.55	10.11	2.9	3.19	4.88	6.7	2.96	2.02	4.21	3.87	2.92	5.15	1.36	1.79	2.42	1.69	4.67	0.69	3.98	3.65	5.3	4.57	2.33	2.99	5.28	3.21	5.45	2.98	2	3.9	2.58	3.86	5.56	2.33
1535	ENSG00000198488.6	<B3GNT6>	0.2	0	0	0	0	0	0	0	0	0	0	0	0	0	0	0.04	0	0	0.24	0	0	0.11	0	0	0	0	0	0	0.02	0	0	0.04	0	0	0	0	0	0	0	0.09	0.1	0	0	0	0	0	0
1536	ENSG00000156966.6	<B3GNT7>	0	0	0	1.03	0	0.81	0	0	0	0	0	0	0	0	0	0.61	0	0.09	0.65	0	0	0	0	0	0	0	0	0.02	0	0	0.17	0	0	0	0	0.36	0	0.87	0	0	0.03	0	0	0.32	0	0	0
1537	ENSG00000177191.2	<B3GNT8>	0	0	4.24	1.99	0	4.43	2.36	0	0	0	1.94	0	0	0	1.18	0	1.15	1.42	1.69	1.19	0.55	0.74	0	1.11	1.64	1.08	0	2.26	1.27	5.78	0	2.76	0	3.59	0	1.87	4.02	4.39	0.61	0	0	0	0	0	2	5.07	1.56
1538	ENSG00000237172.3	<B3GNT9>	0	0	0	0	0	0	0	0	0	0	0	0	0	0	0	0	0	0	0	0	0	0	0	0	0	0	0	0	0	0	0	0	0	0	0	0	0	0	0	0	0	0	0	0	0	0	0
1539	ENSG00000175711.4	<B3GNTL1>	10.9	12.33	15.32	11.82	14.79	10.39	8.52	8.23	13.72	12.81	13.62	7.67	15.49	9.83	19.36	9.91	9.33	13.05	18.31	9.38	12	15.46	8.33	11.64	12.97	6.32	7.94	11.45	13.22	14.95	12.58	13.35	7.3	17.76	8.58	11	13.46	16.07	7.19	12.86	12.12	14.24	20.89	17.8	17.34	11.92	13.67
1540	ENSG00000135454.9	<B4GALNT1>	50.97	26.97	83.93	48.22	87.85	71.72	88.36	37.33	93.48	62.45	62.1	83	86.04	81.45	72.66	50.09	43.06	64.22	62.44	110.67	18.81	66.46	33.81	47.23	78.67	70.57	69.5	63.84	52.85	57.79	22.24	45.27	38.51	80.74	67.72	93.66	58.97	71.2	25.61	62.77	76.53	79.11	61.63	54.09	51.99	46.66	30.9
1541	ENSG00000167080.4	<B4GALNT2>	0	0	0	0	0	0	0	0	0	0	0	0	0	0	0	0	0	0	0	0	0	0	0	0	0	0	0	0	0	0	0	0	0	0	0	0	0	0.05	0	0	0	0	0	0	0	0	0
1542	ENSG00000139044.6	<B4GALNT3>	37.38	19.37	34.59	14.53	32.65	22.81	23.88	13.14	33.77	30.1	21.33	57.75	38.44	22.79	32.02	24.15	20.06	18.67	27.95	56.2	9.02	19.42	21.96	16.2	22.02	31.78	37.99	25.59	26.21	23.8	18	21.09	16.21	36.02	41.49	35.66	34.07	26.09	9	27.57	51.19	34.74	27.3	15.98	32.24	15.84	18.77
1543	ENSG00000182272.7	<B4GALNT4>	67.89	48.27	81.9	31.05	91.44	48.26	57.22	30.04	162.18	16.41	31.48	88.14	57.31	23.69	55.4	39.27	72.25	31.86	57.34	55.63	12.29	68.83	42.23	31.14	51.84	45.8	54.16	106.06	94.41	30.88	61.23	78.45	38.29	108.84	86.76	109.78	41.54	37.32	13.04	41.19	74.37	212.32	52.19	50.75	85.4	49.16	15.71
1544	ENSG00000086062.8	<B4GALT1>	0	0	0	0.18	0.12	0.13	0	0.2	0	0.2	0.2	0	0	0.11	0.32	0.74	0.07	0.11	0	0	0	0.21	0.3	0.16	0.07	0.11	0	0.09	0	0.16	0	0.48	0	0	0.1	0	0.21	0	0	0.07	0	0.53	0	0.17	0	0.28	0.22
1545	ENSG00000117411.12	<B4GALT2>	87.87	77.49	58.17	58.66	67.73	76.57	73.07	57.47	67.59	65.25	88.59	74.02	55.15	59.45	80.58	95.11	53.08	63.3	56.54	73.21	61.63	40.62	55.96	57.17	61.14	83.71	56.78	80.27	67.67	56.23	108.46	62.38	47.91	69.89	55.2	87.02	65.65	60.22	55.03	69.3	73.14	59.24	87.94	76.72	60.91	67.14	48.68
1546	ENSG00000158850.10	<B4GALT3>	19.64	30.16	28.93	33.11	30.66	22.63	25.11	29.01	33.08	25.01	44.71	31.4	39.77	19.39	22.62	61.62	19.72	22.35	33.2	38.98	23.44	24.07	26.38	31.16	24.31	26.85	45.35	17.81	24.4	22.44	42.17	27.85	21.98	28.96	37.86	21.63	30.39	26.47	18.99	20.98	25.78	34.36	30.75	24.3	27.16	21.04	45.65
1547	ENSG00000121578.8	<B4GALT4>	33.99	55.47	48.22	32.7	31.35	52.22	36.76	32.17	30.6	41.34	22.86	29.51	33.13	36.09	51.93	23.76	45.77	38.87	23.52	24.57	45.68	27.68	34.61	46.94	35.17	27.73	27.29	59.76	37.33	28.24	26.35	40.9	25.52	31.19	36.01	36.48	44.69	35.18	55.27	30.8	25.07	22.57	41.21	32.49	40.86	38.12	34.82
1548	ENSG00000158470.5	<B4GALT5>	0	0	0	0	0	0	0	0	0	0	0	0	0	0	0	0	0	0	0	0	0	0	0	0	0	0	0	0	0	0	0	0	0	0	0	0	0	0	0	0	0	0	0	0	0	0	0
1549	ENSG00000118276.7	<B4GALT6>	2.68	2.84	2.61	2.46	3.24	4.19	1.86	3.4	4.03	1.78	2.74	3.3	2.58	1.67	4.14	2.77	2.89	2.6	2.74	3.25	4.43	5.55	2.59	3.23	2.31	2.13	2.16	3.89	4.9	3.44	1.14	1.79	3.49	1.56	2.63	3.44	5.3	3.64	1.18	4.19	4.21	1.31	4.69	2.53	3.53	5.07	2.58
1550	ENSG00000027847.9	<B4GALT7>	11.13	21.59	18.54	21.57	10.81	15.05	19.72	8.69	11.33	16.19	33.19	12.35	13.46	10.33	14.38	24.92	14.34	16.29	10.73	18.57	17.28	26.92	9.66	17.16	17.26	9.73	16.33	19.76	15.55	12.53	21.62	14.71	14.46	16.12	11.15	16.45	15.52	18.35	8.74	23.93	14.69	24.12	15.21	9.01	21.93	23.88	17.89
1551	ENSG00000108641.10	<B9D1>	24.58	25.19	29.95	27.78	19.75	19.6	17.79	21.83	28.33	22.31	24.18	24.99	18.22	20.59	24.21	20.22	27.75	22.1	19.35	20.38	24.73	13.03	29.4	23.43	24.49	17.14	22.45	22.96	24.06	24.35	25.95	30.36	19.6	25.69	15.67	25.17	20.33	20.39	28.62	26.4	22.29	25.65	29.41	19.5	25.97	26.84	17.23
1552	ENSG00000123810.3	<B9D2>	0.4	0.43	1.33	0	1.44	0	0.45	1.8	0	0.9	0	0.62	1.27	0.7	0.9	0	0.78	0.59	0	0	1.95	0.83	0.96	2.07	0.29	0.49	0.32	0.39	1.47	1.91	0	0	1.31	0	0.98	0.44	0.4	3.5	0.72	0.74	0.82	0	0	0.56	0.6	2.26	0.81
1553	ENSG00000164929.12	<BAALC>	3.02	3.24	3.94	8.79	7.85	5.18	6.56	4.35	5.43	4.57	4.43	2.86	1.84	5.74	3.02	10.97	10.21	2.67	6.32	5.4	1.89	2.65	5.99	5.46	6.11	10.96	6.45	1.95	5.24	4.87	10.22	7.39	7.43	3.85	3.52	6.67	4.3	7.39	3.61	3.25	7.26	21.23	3.97	4.27	2.84	6.95	7.79
1554	ENSG00000136881.7	<BAAT>	0.14	0.22	0	0	0	0	0	0	0.12	0	0	0.18	0	0.15	0.04	0	0	0	0	0	0	0	0	0.05	0	0.07	0.18	0	0	0	0.09	0.09	0.04	0.26	0.22	0	0	0	0.04	0	0	0.07	0	0	0.07	0.28	0
1555	ENSG00000105393.11	<BABAM1>	113.22	100.48	108.23	95.72	129.66	127.86	113.5	129.83	118.33	106.36	116.06	91.85	97.4	111.19	108.45	86.29	98.05	115.51	82.77	120.85	107.02	94.74	122.77	116.09	121.09	106.02	94.19	105.34	98.13	99.78	148.09	119.83	109.91	112.48	99.87	100.47	101.24	111.62	110.09	112.9	127.49	117.16	97.63	136.38	102.15	118.83	107.31
1556	ENSG00000186318.12	<BACE1>	33.16	39.93	35.85	46.25	40.24	45.62	37.75	41.74	39.27	38.45	27.43	35.15	36.02	57.85	30.56	25.4	37.78	43.66	37.56	46.11	29.32	50.6	38.5	32.19	40.79	37	24.99	41.76	38.07	39.12	33.55	33.12	46.62	45.34	45.05	41.69	43.78	46.3	43.5	28.07	49.06	38.19	37.04	43.37	40.41	42.37	26.78
1557	ENSG00000182240.11	<BACE2>	137.37	104.48	119.24	87.36	111.02	99.99	113.38	93.33	95.18	88.8	80.95	113.76	105.85	103.11	115.29	126.29	104.84	105.69	110.23	124.72	74.55	111.31	86.77	103.03	119.03	92.35	121.5	102.62	109.3	103.2	104.45	87.09	78.32	69.8	104.17	109.72	88.94	135.86	89.71	105.46	120.11	55.56	124.71	90.87	94.25	99.22	84.23
1558	ENSG00000156273.11	<BACH1>	9.05	1.8	6.65	4.47	12.97	3.66	6.2	6.32	4.2	2.39	3.76	7.19	5.01	10.48	3.45	16.71	1.68	5.69	2.52	0.9	2.09	6.24	1.78	2.99	5.62	0.95	2.88	6.35	4.16	3.27	13.76	4.66	3.1	6.1	2.82	7.09	3.32	3.99	4.43	4.71	1.18	5.49	2.14	3.88	4.22	3.62	3.98
1559	ENSG00000112182.10	<BACH2>	4.51	5.4	5.88	6.62	7.55	5.52	7.89	4.79	8.53	3.8	5.86	8.46	9.83	7.58	3.13	5.21	5.54	6.52	2.56	7.8	3.02	6.3	8.69	5.13	6.72	7.42	4.55	6.84	5.81	3.67	0.36	2.14	7.12	4.87	6.17	8.65	0.19	2.11	5.38	3.45	2.81	11.09	7.34	7.89	7.05	7.88	5.94
1560	ENSG00000002330.9	<BAD>	24.35	21.07	17.98	19.29	21.58	19.44	24.04	27.87	19.35	19.14	20.53	21.47	17.64	15.52	23.32	16.02	22.55	18.45	13.9	21.44	18.01	17.31	19.77	12.86	18.45	19.44	19.34	24.75	25.85	20.04	18.58	31.58	29.73	20.03	17.44	20.14	22.01	25.04	20.49	18.35	15.64	11.91	34.4	23.87	19.76	20.52	13.42
1561	ENSG00000107262.12	<BAG1>	159.84	181.29	143.43	172.5	154.48	168.27	170.2	239.01	141.09	175.88	167.18	135.56	133.8	140.32	148.99	209.11	150.35	194.77	176.45	159.5	196.81	111.81	184.04	184.12	171.9	187.02	175.38	144.87	150	185.81	237.63	195.65	199.02	148.97	157.72	151.67	138.63	140.31	157.3	186.42	123.71	134.08	146.96	187.93	165.04	165.47	185.1
1562	ENSG00000112208.10	<BAG2>	11.38	10.46	9.15	6.5	7.5	16.84	10.7	14.26	9.92	8.4	7.13	13.36	8.81	9.28	4.37	9.58	6.84	11.52	5.05	5.83	13.93	7.69	14.8	8.51	12.31	12.81	15.47	17.88	10.84	9.31	10.37	10.49	12.48	6.17	25.59	11.92	19.47	8.52	8.35	13.99	19.14	13.77	18.42	8.54	13.06	6.51	18.11
1563	ENSG00000151929.5	<BAG3>	4.31	5.96	4.22	7	2.57	2.46	6.99	4.02	3.99	4.1	7.26	3.27	3.85	3.27	5.52	6.9	4.24	3.91	6.08	3.3	3.26	4.26	2.45	2.29	4.11	4.34	4.25	5	2.94	3.29	3	3.21	2.21	2.71	7.54	5.73	3.66	2.14	6.56	3.84	1.33	2.17	4.13	4.05	3.92	4.68	6.85
1564	ENSG00000156735.6	<BAG4>	1.04	4.72	0	1.14	1.16	1.76	0.47	0.51	0.97	0.18	1.13	0.23	0	1.67	0.44	1.48	0.49	0.61	0.18	1.07	0.84	1.57	1.17	0.11	1.01	0	0.95	1.33	0.5	0.47	0.39	0.17	0.82	1.38	0.98	0.64	0.61	0.87	1.66	0.46	2.15	0.5	0.66	0.48	1.6	1.11	1.12
1565	ENSG00000166170.9	<BAG5>	6.34	6.03	7.04	6.03	11.27	2.53	4.21	6.67	2.09	10.7	5.81	12.16	8.24	12.53	13.49	3.77	8.39	8.13	9.77	10.52	3.04	9.74	12.54	13.86	12.05	4.47	3.48	3.52	1.92	13.78	0	5.59	6.68	10.21	5.57	6.98	4.69	1.2	14.38	11.73	5.71	2.34	1.78	2.54	7.87	8.54	4.18
1566	ENSG00000204463.8	<BAG6>	348.08	356.58	252.55	308.91	350.86	326.92	364.61	382.92	350.98	303.27	360.46	339.34	342.41	277.71	316.42	326.14	339.84	335.79	296.12	325.36	258.48	290.19	260.65	343.74	293.83	326.02	326.28	333.1	327.44	318.07	471.99	386.31	318.52	376.51	299.75	355.88	283.69	371.83	239.82	341.19	356.6	365.22	407.75	392.02	335.42	340.69	340.63
1567	ENSG00000140320.7	<BAHD1>	26.14	20.38	27.62	21.26	16.33	22.56	19.47	22.12	22.92	19.11	20.01	22.83	22.77	22.81	18.74	19.85	21.69	21.82	16.9	19.29	12.18	21.49	17.98	20.4	15.37	21.88	24.75	20.93	20.9	15.38	19.73	20.85	20.97	21.91	24.75	18.34	20.31	18.14	21.02	18.81	25.82	22.85	24.34	15.44	19.39	19.91	24.72
1568	ENSG00000181790.6	<BAI1>	3.7	4.09	3.64	3.55	4.91	5.75	7.26	2.63	5.93	7.74	11.47	10.9	9.4	4.04	3.57	17.21	2.45	3.11	6.93	4.52	4.03	3.45	3.73	2.83	3.62	3.96	5.5	6.28	4.84	2.64	39.42	1.59	3.34	2.63	5.24	8.02	5.18	4.5	1.25	4.01	8.03	4.44	5.07	10.77	0.99	1.26	1.91
1569	ENSG00000121753.8	<BAI2>	7.52	7.63	14.77	2.35	12.08	16.99	13.33	13.54	18.13	11.8	9.86	11.59	27.33	12.02	11.42	12.55	6.57	3.83	10.2	10	5.7	6.99	3.18	8.72	8.79	16.24	9.43	12.87	19.5	16.13	12.06	11.34	7.96	10.16	13.66	22.83	16.66	7.48	2.38	13.95	11.5	40.3	19.25	29.42	9.77	7.04	15.5
1570	ENSG00000135298.9	<BAI3>	4.96	2.63	12.64	6.89	27.67	6.33	10.84	5.16	14.37	6.48	6.21	12.79	7.85	11.43	9.88	4.78	7.76	5.75	7.64	8.86	4.06	9.76	13.61	6.15	4.68	5.68	3.99	6.96	11.37	4.49	1.58	9.55	5.42	7.29	5.84	14.29	5.42	10.91	7.39	6.33	16.7	12	10.37	11.89	9.71	11.7	7.37
1571	ENSG00000175866.11	<BAIAP2>	137.86	195.24	108.46	148.78	124.34	107.14	109.76	123.07	127	164.81	181.28	87.15	105.39	122.82	129.08	76.52	167.24	190.85	133.78	111.85	154.17	124.54	160.56	140.72	135.83	87.2	115.92	132.81	100.76	161.43	152.64	162.5	156.6	156.13	149.76	111.85	101.87	119.34	203.95	157.76	114.18	105.54	111.74	153.86	144.52	188.19	125.17
1572	ENSG00000006453.9	<BAIAP2L1>	2.24	2.54	1.72	3.8	3.2	1.52	0.83	4.3	1.65	2.01	2.76	2.74	1.38	1.6	2.4	1.72	1.66	2.78	1.4	1.63	0.84	3.06	3.06	1.09	3.26	3.5	2.55	1.16	2.39	2.51	0.83	3.45	2.28	4.01	2.2	1.54	2.59	1.43	1.16	2.8	2.74	1.5	5.24	2.54	3.35	1.9	2.29
1573	ENSG00000128298.12	<BAIAP2L2>	6.75	3.19	6.16	4.05	4.05	5.32	4.41	2.04	7.11	4.5	3.18	8.06	7.9	5.34	6.6	3.77	5.54	5.03	5.45	7.42	2.37	4.24	6.98	5.3	6.81	7.75	7.6	5.75	3.89	2.78	8.44	4	4.73	8.86	7.54	4.43	3.45	5.04	2.58	3.08	9.13	7.89	4.29	4.44	5.03	2.02	4.29
1574	ENSG00000007516.9	<BAIAP3>	10.29	2.92	8.45	7.08	5.28	7.69	8.43	4.65	7.58	4.3	8.95	8.62	19.91	7.47	8.12	2.14	9.62	6.08	5.48	11.68	1.8	3.98	9.35	9.58	4.52	7.92	11.82	6.8	11.09	6.53	0.51	4.77	3.27	15.97	15.61	8.47	7.05	2.82	3.58	7.03	7.26	17.7	9.43	7.54	8.76	4.79	3.41
1575	ENSG00000030110.8	<BAK1>	20.72	22.13	16.65	26.96	21.26	23.64	21.63	22.41	19.66	22.34	33.09	14.68	18.36	21.3	29.23	39.58	21.11	30.67	19.84	21.08	16.28	18.15	26.88	17.27	21.59	19.1	16.61	17.55	17.45	21.84	32.1	28.68	17.41	26.23	18.34	16.08	18.46	20.49	20.71	34.47	21.69	15.41	21.08	21.57	25.49	29.34	18.31
1576	ENSG00000095739.7	<BAMBI>	2.59	11.02	4.25	3.91	2.41	6.34	2.27	3.55	4.24	2.5	6.97	5.62	2.19	3.63	8.81	5.5	4.06	6.21	3.72	5.76	3.1	5.62	9.66	5.73	6.14	1.58	2.05	2.75	3.73	4.11	6.47	2.38	3.6	3.11	2.8	4.03	9.19	4.32	1.7	3.86	7.31	0.83	3.52	7.21	2.89	4.42	1.72
1577	ENSG00000175334.3	<BANF1>	206.91	228.24	182.25	162.2	165.23	120.76	247.49	212.67	159.78	168.46	188.11	224.34	161.73	109.57	157.5	173.39	174.93	167.68	143.72	217.69	169.56	118.48	183.6	170.94	142.58	245.98	181.93	154.51	198.22	172.45	236.17	144.37	139.59	204.18	231.47	184.19	144.02	205.13	153.37	208.61	153.31	234.32	141.57	197.76	136.43	162.18	155.38
1578	ENSG00000125888.10	<BANF2>	0	0	0	0.22	0	0	0	0	0	0	0	0	0	0	0.39	0	0	0	0	0	0	0	0	0	0	0	0	0	0.32	0	0	0	0	0	0	0	1.8	0	0	0	0.49	0	0	0	0	0	0.51
1579	ENSG00000153064.7	<BANK1>	6.34	8.62	2.49	4.81	8.24	8.51	6.16	6.67	10.52	5.56	5.66	5.74	3.41	7.65	5.96	4.98	5.05	4.61	4.96	11.33	12.99	4.85	7.98	10.54	5.32	6.47	8.94	4.05	3.68	3.31	1.93	7.24	5.62	10.78	16.72	8.54	6.68	8.49	1.9	4.23	7.89	11.52	7.04	3.79	10.03	5.51	8.85
1580	ENSG00000172530.15	<BANP>	36.92	30.25	34.5	22.98	24.92	31.75	29.16	25.48	31.68	22.6	25.23	27.23	32.94	30.71	21.11	20.58	25.58	32.07	23.94	33.07	22.42	17.6	26.38	28.44	24.74	34.18	37.2	35.13	29.47	24.64	32.39	35.11	24.22	29.89	66.89	38.46	21.5	24.05	28.68	25.51	27.61	28.48	29.55	27.12	26.06	23.55	29.38
1581	ENSG00000163930.5	<BAP1>	96.06	109.41	88.34	93.22	126.74	104.89	94.72	120.7	96.96	101.14	146.45	97.17	106.71	88.45	130	127.46	93.31	102.63	94.62	122.01	85.51	149.55	108.02	94.76	116.19	100.26	94.63	114.86	102.54	91.63	148.91	113.09	114.2	108.09	89.04	101.87	111.55	118.73	70.65	126.44	110.09	113.06	126.01	120.57	124.79	111.94	97.28
1582	ENSG00000138376.6	<BARD1>	6.8	0.56	0.86	2.37	5.02	10.5	1.91	0	2.34	0.83	14.21	0.62	1.15	4.42	1.52	0.92	5.16	0.41	1.74	4.97	0	3.7	2.26	1.98	2.34	0.35	0.54	0.49	1.56	1.02	0.56	0.2	1.77	0.66	0.57	3.93	2.62	1.27	1.42	1.63	0	0	5.63	17.37	3.31	9.19	1.37
1583	ENSG00000125492.5	<BARHL1>	0.14	0	0	0	0	0	0	0	0	0	0	0.12	0	0	0.09	0	0	0	0.11	0	0	0.07	0	0	0	0.11	0	0	0	0	0	0	0	0	0.1	0	0	0.07	0	0	0	0.12	0	0	0	0	0.16
[truncated: 17,847 more rows]
[truncated: 201 more columns]
