# Supplementary material for: Transcriptome Analysis of the Human Tibial Nerve Identifies Sexually Dimorphic Expression of Genes Involved in Pain, Inflammation, and Neuro-Immunity
Source: Front Mol Neurosci. 2019 Mar 5;12:37. doi: 10.3389/fnmol.2019.00037 (PMC6412153; doi:10.3389/fnmol.2019.00037)
Supplement: Supplementary file 3 [file Table_3.XLSX]

## Sheet: all_cjp
Supplementary Table 3. Male and female hTN sample gene expression values in TPM (with log2 fold change and strictly standardized mean difference or SSMD between male and female CJP subcohorts shown)
			Female -->										Male -->
gene_#	ensembl_id	gene_name	F1	F2	F3	F4	F5	F6	F7	F8	F9	F10	M1	M2	M3	M4	M5	M6	M7	M8	M9	M10	M11	Log2 Median fold change (female : male, smoothing factor 0.5)	SSMD (smoothing factor 0.001)
1	ENSG00000121410.7	<A1BG>	110.383	93.3899	67.2053	66.4641	67.5146	32.7986	104.773	58.4138	115.608	90.8371	76.0253	49.3013	40.6329	54.9602	116.953	46.487	81.4808	75.6903	54.6944	102.933	62.485	0.339134	0.320958
2	ENSG00000148584.10	<A1CF>	0.0351425	0.165552	0.0187097	0	0	0	0	0.16206	0.0739535	0	0	0.0176139	0	0.0179902	0.112726	0.0190677	0	0	0.210836	0.11144	0.0172468	-0.0232052	0.00472905
3	ENSG00000175899.10	<A2M>	235.543	260.616	387.198	452.291	400.631	316.85	467.884	321.114	238.944	331.841	354.26	272.047	462.985	179.705	204.147	371.896	501.735	216.68	286.966	818.338	359.043	-0.11765	-0.124172
4	ENSG00000166535.15	<A2ML1>	8.06521	4.94818	1.25355	14.4607	1.05948	6.85996	6.81976	11.8844	14.5688	16.912	5.36087	3.94551	0.558095	6.76433	10.8781	1.96397	10.0643	7.04054	3.56664	5.29338	7.24364	0.442123	0.46567
5	ENSG00000184389.8	<A3GALT2>	0	0.588631	0.243226	0.293707	0.584542	0	0	0.252094	0	0	0.123848	0	0	0.359805	0	0.114406	0.341162	0	0	0	0	0.314089	0.403384
6	ENSG00000128274.11	<A4GALT>	13.2136	13.4281	10.0471	20.6631	8.23839	10.5954	17.687	24.2911	43.2628	19.4713	14.791	13.0695	33.5397	35.2249	10.4835	36.4192	33.9266	26.3169	26.9343	19.0376	17.7642	-0.73989	-0.442325
7	ENSG00000118017.3	<A4GNT>	0	0	0	0	0	0	0	0	0	0	0	0	0	0	0	0	0	0	0	0	0	0	1
8	ENSG00000094914.8	<AAAS>	111.841	91.5505	79.7408	119.85	109.565	117.475	69.1587	88.467	106.105	164.468	117.497	125.887	116.228	115.551	77.5556	69.4063	74.2974	107.4	88.8147	51.5966	111.414	0.00580909	0.272142
9	ENSG00000081760.12	<AACS>	18.4674	23.2509	16.9884	18.9009	24.9161	28.6792	28.9978	26.9741	23.0365	14.8196	26.0966	22.8981	53.5771	41.5035	20.3846	25.646	19.3325	21.3903	61.9155	29.4572	40.6334	-0.169787	-0.685415
10	ENSG00000114771.9	<AADAC>	0	0.220737	0	0	0	0	0	0	0	0	0.212312	0	0	0	0.807871	0	0	0	0	0	0.137974	0	-0.322806
11	ENSG00000197953.5	<AADACL2>	0	0	0.0187097	0	0.0182669	0	0	0.0720269	0	0	0.26539	0.0352278	0	0.0359805	0	0	0	0	0.158127	0	0	0	-0.363624
12	ENSG00000188984.7	<AADACL3>	0	0	0	0	0	0	0	0	0	0	0	0	0	0	0	0	0	0	0	0	0	0	1
13	ENSG00000204518.2	<AADACL4>	0	0	0	0	0	0	0	0	0	0	0	0	0	0	0	0	0	0	0	0	0	0	1
14	ENSG00000109576.9	<AADAT>	12.6513	1.7475	3.64839	15.4973	5.91849	7.10434	0.554452	4.84381	4.15988	4.13289	8.35092	14.8309	6.13904	17.5405	8.17265	6.57834	2.78615	5.51778	10.0499	7.39216	5.12229	-0.65796	-0.373201
15	ENSG00000158122.7	<AAED1>	12.4932	9.23414	14.3878	9.17401	8.00092	13.5105	20.5332	11.5603	12.7385	9.68375	5.09548	15.1127	14.1864	13.8885	15.5562	17.5995	18.1384	9.38739	22.1905	10.5125	18.0918	-0.317711	-0.398919
16	ENSG00000103591.8	<AAGAB>	12.827	19.9767	14.1633	13.1995	25.6651	13.877	24.8949	19.8254	19.117	17.5172	19.3557	13.0167	17.337	29.0722	16.0635	27.1333	20.6024	17.5207	23.8069	19.6319	15.5221	-0.0775122	-0.265215
17	ENSG00000115977.14	<AAK1>	7.30965	6.51173	6.13679	3.97368	6.8501	9.96702	3.71483	6.23032	5.65744	3.83892	5.11317	8.10239	7.36325	5.43305	3.49451	3.85167	6.103	5.35654	8.22261	2.97172	4.89808	0.190566	0.185175
18	ENSG00000087884.10	<AAMDC>	139.902	167.815	126.291	106.149	110.844	146.555	112.387	161.052	166.266	176.417	132.341	158.155	138.12	89.0157	118.269	163.429	134.418	153.602	86.0563	174.626	122.504	0.0912703	0.19775
19	ENSG00000127837.5	<AAMP>	86.3276	87.2093	71.4898	63.6652	109.072	122.345	101.317	117.584	70.9584	107.576	78.113	72.9391	121.935	141.097	76.5598	87.0058	63.3613	95.2533	149.676	94.2408	147.839	0.000339804	-0.23087
20	ENSG00000129673.5	<AANAT>	0	0.680604	0.187097	0.103661	0.219203	0	1.88514	0.270101	0.462209	0.190217	0.159234	0	0	0.791571	0.150302	0	0	0	0.298685	0	0	0.495101	0.446868
21	ENSG00000131043.7	<AAR2>	0.913706	3.23747	3.01226	3.57631	0.493207	3.05469	3.8442	3.45729	1.81186	4.04643	1.82234	2.44833	4.87883	3.14829	4.17087	2.84108	5.61021	3.6188	1.65155	1.26298	1.24177	0.126031	-0.117561
22	ENSG00000205002.3	<AARD>	0	0	0	0.190045	0.602809	0	0.85016	0.10804	0	0	0	0	0	0.359805	0.73272	0.286015	0.151627	0	0	0	0	0	0.0960061
23	ENSG00000090861.11	<AARS>	19.1527	17.2174	9.78518	26.6236	22.8154	11.2587	22.3999	23.0306	19.4128	18.4856	17.1795	15.6059	17.427	25.2763	20.9107	7.97028	19.0103	20.7275	52.6212	11.4411	16.2292	0.14211	-0.107964
24	ENSG00000124608.4	<AARS2>	0	0.220737	0.392904	0	0	0	0	0.576215	0.184884	0.207509	0.194619	0	0.378064	0	0	0.152541	0	0.143319	0	0	0.241455	0.244745	0.242574
25	ENSG00000266967.2	<AARSD1>	115.795	123.539	75.7743	113.785	122.224	95.0271	112.591	102.782	108.416	111.294	102.83	119.951	121.593	105.675	88.6403	76.8427	97.269	105.393	150.344	81.5181	121.4	0.0865769	0.0639433
26	ENSG00000157426.9	<AASDH>	9.75205	11.6806	6.30517	9.81326	10.0651	11.6427	8.87123	11.9204	5.73139	7.62596	13.2341	16.9446	10.7298	9.55282	8.26658	5.85377	9.51462	12.6658	9.69846	13.5771	11.4346	-0.127123	-0.456901
27	ENSG00000149313.6	<AASDHPPT>	2.24912	1.06689	2.43226	1.88318	3.85432	14.8894	1.47854	2.71901	2.81023	2.36906	2.08773	6.62283	3.90666	4.15575	0.864234	2.05931	2.53976	2.1677	1.87996	0.148586	4.63938	0.120787	0.168819
28	ENSG00000008311.10	<AASS>	130.221	178.171	97.7583	71.3362	195.712	295.45	69.6392	192.096	157.502	76.1731	51.3086	84.3177	117.362	286.207	47.5704	183.011	87.2237	48.2447	102.747	145.893	107.396	0.48358	0.314244
29	ENSG00000108270.6	<AATF>	12.9149	8.71909	7.78324	9.98603	11.7639	7.43599	14.7299	9.54356	10.5199	9.3552	7.2009	8.91263	15.5727	18.0082	9.54415	8.2563	16.1104	4.55037	22.7176	23.9409	12.021	-0.286644	-0.451083
30	ENSG00000181409.7	<AATK>	1051.2	1269.44	241.954	832.624	636.932	700.275	1135.87	803.352	908.5	1478	883.676	1409.6	42.5953	1178.94	769.563	237.106	532.762	1053.95	1022.68	336.789	1616.76	-0.0215588	0.131433
31	ENSG00000183044.7	<ABAT>	1.79227	1.87626	1.64645	2.07322	2.94098	2.70558	0.813196	2.93509	3.12453	2.54199	2.07004	1.9023	1.54826	3.83192	0.920597	2.72668	0.379069	3.09927	3.25039	1.82018	2.38005	0.12755	0.0560396
32	ENSG00000165029.11	<ABCA1>	57.9852	38.5921	97.3654	101.674	50.0149	43.7781	29.7556	45.593	37.0322	38.8906	31.2275	35.6153	42.1092	49.815	73.9296	35.3705	20.5266	21.2649	59.1395	16.6788	19.8165	0.333062	0.554029
33	ENSG00000154263.13	<ABCA10>	194.356	130.694	153.251	424.268	180.423	308.297	195.777	190.421	212.709	212.126	219.283	243.054	109.171	177.222	131.89	102.87	150.244	240.202	189.981	80.8866	224.018	0.138037	0.486398
34	ENSG00000144452.10	<ABCA12>	0	0	0	0	0	0	0	0	0.0184884	0	0.0707705	0.0176139	0.0180031	0	0	0	0.0189534	0	0	0	0.0517403	0	-0.512751
35	ENSG00000179869.10	<ABCA13>	1.84498	1.43479	0.63613	1.55492	0.0913347	2.09464	5.24881	2.46692	2.51442	4.06372	2.26466	1.62048	0.0720123	3.47212	4.24602	1.33474	3.03255	4.8191	1.66912	1.98734	1.94888	-0.0102015	-0.102193
36	ENSG00000107331.12	<ABCA2>	891.689	981.395	370.471	950.245	538.637	833.948	617.475	781.059	713.947	1326.74	677.097	839.69	72.1563	773.059	555.815	251.922	431.096	735.387	759.924	506.642	834.76	0.253934	0.589111
37	ENSG00000167972.9	<ABCA3>	13.1609	7.15554	7.91421	13.2514	3.96393	11.1365	17.2804	7.40076	18.2665	18.2608	10.5802	3.57562	7.84934	6.47649	9.28112	3.66099	6.17882	15.2635	11.2973	18.1832	3.08717	0.599256	0.438788
38	ENSG00000198691.7	<ABCA4>	1.75713	0.478262	0.63613	1.71041	0.876813	0.349107	0.73927	0.990369	0.184884	0.0691697	0.123848	0.95115	0.162028	0.305834	0.187877	0.114406	0.0758137	0.66285	0.0175697	0.315746	0.603636	0.787948	0.705459
39	ENSG00000154265.11	<ABCA5>	57.1066	40.1557	41.9098	71.1634	50.8917	106.356	34.9859	54.6684	52.5624	40.7582	48.2655	62.5293	114.301	83.3848	17.078	54.5907	43.7635	44.8588	62.1791	49.0334	52.8268	-0.0300633	-0.07638
40	ENSG00000154262.8	<ABCA6>	129.166	79.4835	147.863	169.175	150.775	167.397	64.0207	129.018	135.446	102.302	98.8841	119.634	94.6421	140.36	63.9345	155.649	120.525	95.9162	131.158	164.596	80.0422	0.144682	0.262037
41	ENSG00000064687.8	<ABCA7>	13.2487	8.84786	12.8162	32.6533	16.6777	10.4034	9.14846	13.6491	15.0126	12.6062	20.9127	14.9014	25.4563	13.4027	20.178	8.9046	19.0482	13.1853	14.4423	10.8282	7.64031	-0.142977	-0.0966401
42	ENSG00000141338.9	<ABCA8>	436.558	238.451	232.786	535.393	492.075	348.444	141.94	278.222	244.878	252.608	254.509	468.688	124.797	349.173	220.267	174.526	229.336	259.371	310.509	19.8177	252.251	0.0732466	0.449578
43	ENSG00000154258.12	<ABCA9>	30.328	48.746	35.9601	69.4184	61.2308	109.218	28.7945	59.6923	66.0959	31.0572	29.7413	41.1813	65.5672	69.9281	16.552	67.5758	41.4132	37.4062	28.744	8.04223	28.2502	0.52961	0.450035
44	ENSG00000085563.10	<ABCB1>	21.3139	15.8562	29.0562	44.9371	19.4726	22.2905	25.6527	20.3116	21.0583	15.5459	14.0126	26.2447	13.5023	16.2092	32.4839	22.0613	18.2711	23.3968	7.186	19.1119	6.36405	0.208257	0.472043
45	ENSG00000135776.4	<ABCB10>	3.28583	0	2.75033	1.76224	0	2.96741	0.998014	1.67462	0.924418	3.73516	1.99927	0.563645	3.13253	3.67001	0	2.17371	0.796044	1.95272	1.7394	1.63445	3.03543	-0.144842	-0.0403942
46	ENSG00000073734.8	<ABCB11>	0	0	0	0.138215	0.0730678	0	0	0.0540201	0	0	0	0	0	0	0	0	0	0.0179149	0.052709	0.0185733	0.0517403	0	0.278426
47	ENSG00000005471.11	<ABCB4>	8.83835	2.59365	44.3794	8.89758	5.95502	12.8122	1.21979	0.774289	3.60523	11.7416	8.10323	17.473	1.98034	1.63711	2.08543	0.400421	5.66707	10.0682	14.4774	4.29043	13.8319	0.356661	0.199295
48	ENSG00000004846.12	<ABCB5>	2.09098	0.772578	56.1853	3.14439	1.29695	0.279286	0.517489	2.34087	0.369767	1.26235	0.796169	3.34664	6.10304	0.503727	0.601206	0.266947	0.170581	1.3257	3.77748	0.260026	0.603636	0.689328	0.298267
49	ENSG00000115657.8	<ABCB6>	48.567	62.4868	40.5627	92.5867	69.6884	88.2718	65.3699	74.98	63.7479	63.8782	75.5299	53.282	50.0845	87.2347	82.3464	49.5187	71.8903	51.7919	83.1221	67.7182	36.4251	-0.0669653	0.110521
50	ENSG00000131269.11	<ABCB7>	26.9016	16.9047	32.4614	23.6175	25.6103	20.6323	12.0501	12.6587	9.17023	22.0824	19.3557	23.5146	25.2223	40.9278	16.2701	19.0677	21.0383	16.1592	18.7468	30.4973	27.9397	0.021213	-0.316058
51	ENSG00000197150.8	<ABCB8>	58.1082	51.8915	37.2136	62.8532	59.1666	43.7432	38.6084	48.33	52.47	51.9983	50.7248	67.4965	33.2157	59.6017	49.2425	31.9002	33.8129	53.028	55.3972	30.7573	55.9312	0.0339602	0.198963
52	ENSG00000150967.13	<ABCB9>	4.77938	11.4967	21.9278	8.25834	10.3026	22.5523	4.58347	8.53518	7.89453	6.76134	7.51937	9.65242	10.3698	10.9381	7.43993	4.59531	6.08405	8.00794	6.86974	2.84171	6.05361	0.164155	0.494019
53	ENSG00000103222.14	<ABCC1>	18.2038	15.0469	18.7658	20.6804	15.4721	17.8568	17.4652	22.7065	15.9924	14.1106	24.0266	19.8156	23.602	20.239	19.0695	20.2499	15.7124	18.8464	32.1174	6.38921	14.9874	-0.161743	-0.278431
54	ENSG00000124574.10	<ABCC10>	39.9395	47.1272	31.3575	57.3937	45.7222	41.055	45.0215	48.7262	42.4863	39.9628	53.1841	52.8417	39.9308	61.1848	42.7984	29.1545	46.1895	48.8001	66.3255	26.114	34.2865	-0.0772937	-0.114353
55	ENSG00000121270.11	<ABCC11>	0.333854	0.0367894	0.187097	0.207322	0.146136	0	0.31419	0.126047	0.0739535	0.50148	0.60155	0.616486	0.288049	0.251863	0.150302	0.438556	0.0568603	0.161234	0.404103	0.0185733	0.0517403	-0.173614	-0.312177
56	ENSG00000140798.11	<ABCC12>	0	0	0.112258	0	0	0	0	0	0	0.276679	0	0.0880695	0.270046	0	0	0	0	0	0	0	0	0	0.0591786
57	ENSG00000023839.6	<ABCC2>	2.23155	3.84449	3.62968	3.33443	3.85432	8.7626	4.47258	6.73451	2.90267	1.64278	5.27241	4.96712	19.2813	6.74634	3.90784	5.62496	2.57767	2.86638	8.32803	3.58464	8.12322	-0.446099	-0.455776
58	ENSG00000108846.11	<ABCC3>	9.91019	9.43649	14.2194	5.51132	16.2028	32.3274	9.38872	7.09465	5.30616	3.66599	11.5356	5.61883	6.08504	26.2298	8.00356	10.6398	16.7738	6.48518	2.95171	4.82905	6.15709	0.504967	0.161573
59	ENSG00000125257.9	<ABCC4>	0.96642	1.60034	0.598711	0.259153	0.255737	4.5384	1.05346	1.80067	0.887442	1.74653	0.920017	1.35627	1.44025	0.215883	0.225452	0.877113	2.44499	0.770339	1.75697	0.872944	1.34525	0.0885824	0.1848
60	ENSG00000114770.12	<ABCC5>	112.667	80.1274	99.3112	142.569	121.292	102.341	42.5265	100.135	81.6631	154.663	116.347	127.718	42.9913	88.1342	70.8484	56.2305	47.213	99.8216	93.9802	44.1672	66.1068	0.511907	0.597826
61	ENSG00000091262.10	<ABCC6>	1.31785	2.04181	0.972905	3.4381	1.53442	0.872769	0.998014	1.80067	0.517674	3.68329	4.68855	5.10803	1.26021	0.539707	0.789083	3.1843	0.227441	1.39736	2.00294	0.538625	2.94919	0.0217153	-0.170756
62	ENSG00000006071.7	<ABCC8>	14.4436	6.07025	2.99355	16.2748	4.311	17.0539	14.7115	15.4137	14.31	57.3244	34.0937	25.8044	6.04903	18.0982	17.0216	4.74785	8.09311	34.8265	17.0074	10.8282	32.9241	-0.216739	-0.144322
63	ENSG00000069431.6	<ABCC9>	1.07185	2.097	2.37613	3.97368	3.12365	4.80023	1.7188	3.00712	1.1093	2.2826	4.12238	4.20972	4.91484	1.42123	1.03332	4.99573	5.49649	3.06344	4.1113	0.817224	4.12197	-0.70803	-0.451447
64	ENSG00000101986.8	<ABCD1>	1.21242	1.83947	2.1142	0.725628	1.47962	4.01474	0.53597	1.76466	3.36488	0.657112	1.15002	1.42673	1.04418	1.38525	1.16484	2.23092	2.44499	1.07489	1.58127	1.33728	2.1041	0.170765	0.184403
65	ENSG00000173208.3	<ABCD2>	0	0	0	0	0	0	0	0	0	0	0	0	0	0	0	0	0	0	0	0	0	0	1
66	ENSG00000117528.7	<ABCD3>	77.3311	90.7595	90.7047	86.5398	105.382	108.293	83.8332	94.0311	99.338	97.0105	60.5088	117.273	54.4053	106.898	75.8647	71.7898	57.4857	83.7699	55.3796	91.0648	118.399	0.2827	0.464166
67	ENSG00000119688.16	<ABCD4>	248.827	155.785	168.668	265.839	194.251	237.76	166.206	149.996	145.818	234.191	253.925	246.278	226.857	218.977	175.609	111.336	183.848	210.052	273.121	106.165	238.126	-0.270455	-0.101886
68	ENSG00000164163.6	<ABCE1>	20.6287	7.44986	9.57937	30.2	18.1756	29.6218	5.1564	12.6047	9.20721	14.0414	16.4011	13.3337	12.5841	17.1267	7.96598	12.9088	10.993	15.9084	28.8846	1.74589	13.1593	0.0171975	0.175266
69	ENSG00000204574.8	<ABCF1>	14.4612	22.2576	14.7058	18.158	32.4238	45.8204	36.8156	18.5109	23.3138	21.5291	17.268	24.6771	29.0209	21.8761	26.4155	24.6354	16.9254	16.8579	23.1217	33.9891	24.8698	-0.166653	0.103076
70	ENSG00000033050.3	<ABCF2>	36.2495	48.5252	31.2639	44.3324	58.6917	32.4845	47.7198	33.4925	46.5537	37.2825	35.6507	33.7835	30.4972	66.9597	53.4134	50.148	45.3935	34.4861	102.923	33.3762	24.9216	0.19238	-0.201593
71	ENSG00000161204.7	<ABCF3>	93.5494	101.484	97.1221	110.624	100.322	100.997	111.519	103.287	122.319	109.807	96.6902	110.333	92.8778	123.917	92.7548	85.8236	110.612	105.321	131.316	70.3184	101.635	0.0105545	0.163874
72	ENSG00000160179.14	<ABCG1>	16.9387	24.281	40.1698	30.1136	17.5728	28.6094	26.5952	18.745	28.4536	30.6422	26.9282	21.0134	52.4789	30.9432	23.3531	24.9024	53.0127	13.472	43.2917	8.26511	21.2308	0.141721	-0.16912
73	ENSG00000118777.6	<ABCG2>	1.95041	2.59365	3.31162	6.56521	0.748945	0	0.776233	1.74665	0.831977	2.38635	1.23848	5.72452	0.774132	6.40453	1.54059	1.20126	0.909764	5.3028	0.720357	1.3187	0	0.433928	-0.0648307
74	ENSG00000172350.5	<ABCG4>	0.0878563	0.275921	0.280646	0.0518306	0.109602	0.593483	0	0.396148	0.184884	0.0864621	0.0707705	0.299436	0.576098	0	0	0.228812	0	0.232893	1.10689	0	0.517403	-0.17124	-0.173662
75	ENSG00000138075.7	<ABCG5>	0.0702851	0.0735788	0.112258	0.0691075	0.146136	0	0.073927	0	0.0739535	0.0691697	0.0707705	0	0.0540092	0.215883	0.0751508	0	0.303255	0.0358297	0	0.0742931	0.0344935	0.0459336	-0.0813246
76	ENSG00000143921.6	<ABCG8>	0	0	0	0	0	0	0	0	0	0	0	0	0	0	0	0	0	0	0	0	0	0	1
77	ENSG00000143994.9	<ABHD1>	8.06521	5.95989	3.94775	5.3731	5.82715	1.20442	1.42309	5.72614	6.58186	12.4505	8.08553	12.1536	1.62028	3.93986	3.43815	1.73516	1.44046	9.79943	3.95318	8.04223	5.44997	0.495158	0.0481811
78	ENSG00000144827.4	<ABHD10>	5.04295	5.16891	3.79807	5.01029	3.05058	0	3.54849	3.4933	5.41709	4.1156	3.66238	5.61883	7.32725	5.77487	2.47998	2.32626	1.0993	6.37769	4.25186	0.185733	1.46597	0.0986121	0.0621585
79	ENSG00000106077.14	<ABHD11>	24.8633	25.0352	25.8194	14.3916	17.1344	32.5543	28.9239	11.0381	19.912	11.6724	20.7358	15.6764	19.2813	16.6949	23.8792	13.0804	9.91264	22.6802	22.2081	17.4403	14.1423	0.351366	0.386724
80	ENSG00000100997.14	<ABHD12>	16.2007	21.6322	18.0923	14.5989	13.0609	14.7149	30.4579	22.5264	24.3862	18.7969	10.5625	19.798	12.7102	14.716	34.513	13.4999	14.4994	16.8937	10.5067	14.4314	15.8843	0.336883	0.382312
81	ENSG00000131969.10	<ABHD12B>	0.931277	2.15218	1.16	1.29576	0.968148	1.955	1.73728	1.13442	0.166395	1.10671	0.654627	2.37788	0.828141	0.935493	0.864234	0.591098	0.151627	0.824084	0.491951	0.204306	0.241455	0.512599	0.620229
82	ENSG00000139826.5	<ABHD13>	0	0	0	0	0	0	0	0	0	0	0	0	0	0	0	0	0	0	0	0	0	0	1
83	ENSG00000248487.4	<ABHD14A>	1.38813	3.20068	5.66904	8.1374	6.48476	1.71063	2.40263	2.86307	2.36651	2.90513	4.10469	4.80859	4.30273	3.40016	5.74903	5.62496	5.26905	3.76212	8.11719	3.78895	0.983065	-0.505085	-0.287233
84	ENSG00000114786.11	<ABHD14A-ACY1>	1.82741	3.73413	2.07678	2.38421	2.72177	2.46121	1.64487	3.87144	5.74988	4.68625	4.24623	2.71254	3.18654	4.08379	1.23999	2.4788	3.8665	5.26697	4.1113	2.97172	1.43148	-0.253966	-0.0651951
85	ENSG00000114779.15	<ABHD14B>	114.266	125.305	148.686	93.606	123.941	110.458	107.323	126.659	128.309	123.9	113.339	133.196	145.447	100.098	106.864	112.518	98.5199	123.899	104.153	132.186	83.6123	0.13867	0.267267
86	ENSG00000168792.4	<ABHD15>	0	0	0	0	0	0	0	0	0	0	0	0	0	0	0	0	0	0	0	0	0	0	1
87	ENSG00000204427.7	<ABHD16A>	94.8146	115.611	86.177	110.054	97.7099	101.678	120.612	102.26	99.7263	122.378	139.117	98.3208	92.2837	117.818	127.681	87.4825	111.143	128.055	121.196	90.8976	86.8719	-0.123706	-0.183651
88	ENSG00000183260.5	<ABHD16B>	0	0	0	0	0	0	0	0	0	0	0	0	0	0	0	0	0	0	0	0	0	0	1
89	ENSG00000129968.11	<ABHD17A>	211.224	215.715	125.187	143.519	131.485	73.5919	237.564	158.459	206.478	242.837	215.797	191.04	122.169	140.522	207.642	84.1647	186.786	222.252	196.974	235.528	167.535	-0.0660521	-0.0620066
90	ENSG00000107362.9	<ABHD17B>	5.28895	4.80102	4.54646	2.41876	2.64871	6.73777	3.03101	3.07915	4.58512	1.19318	3.23775	6.71089	5.869	3.07633	3.32542	3.66099	3.60115	4.35331	3.1274	0.520052	2.69049	0.173008	0.0788312
91	ENSG00000136379.7	<ABHD17C>	0.158141	0.66221	0	0	0	0	1.12739	0.342128	0	0	0.60155	2.30742	0	0	0	0	3.07046	0.519531	0.456812	0	2.34556	-0.936307	-0.507247
92	ENSG00000140526.12	<ABHD2>	2.05584	7.59702	4.84582	4.54381	1.71709	0	4.8607	4.78979	0.388256	2.2826	0	6.02395	4.86083	12.3233	2.743	0.57203	0.265348	0.62702	0	7.80077	12.9351	0.271021	-0.196747
93	ENSG00000158201.5	<ABHD3>	28.7993	19.2409	28.5323	55.977	34.1592	28.5395	10.4052	41.4515	20.4851	31.9564	27.0697	22.1407	30.8573	35.6747	13.9405	27.5718	16.7169	23.773	25.722	27.4327	15.1254	0.153679	0.404309
94	ENSG00000100439.6	<ABHD4>	59.8829	77.9568	92.4634	94.6772	66.6195	69.9961	58.0327	74.9259	73.6022	61.7512	65.4804	71.6181	71.7062	61.5446	68.1242	101.898	94.6155	82.48	54.3782	58.9516	47.6528	0.0752615	0.106613
95	ENSG00000011198.3	<ABHD5>	16.886	15.0469	19.3458	17.7261	20.6051	23.46	13.8243	15.8639	21.0583	15.1827	13.9595	14.8837	31.7034	20.5988	15.4059	59.9869	16.7738	14.4215	45.6109	16.233	14.7977	0.0896658	-0.38966
96	ENSG00000163686.9	<ABHD6>	4.62124	11.2576	8.36324	4.52654	7.28851	7.628	8.16893	14.8916	12.4057	5.75838	6.52858	14.2673	13.2683	10.6682	5.99327	7.95122	8.85125	9.83526	2.35434	4.68046	7.88177	-0.00903369	0.0209231
97	ENSG00000127220.5	<ABHD8>	0	0	0.710969	0	0	0	0	0	0	0	0	0	0	0	0	0	0	0	0	0.408612	0.655377	0	-0.0776763
98	ENSG00000136754.12	<ABI1>	44.016	56.9316	68.0285	48.8935	51.4032	55.2463	56.4063	52.3455	65.7077	43.2483	47.6817	57.7912	66.1253	57.9466	48.491	71.4656	71.8903	55.9302	47.8247	48.8291	44.6863	-0.0556244	-0.157628
99	ENSG00000138443.11	<ABI2>	59.8477	46.1155	43.2194	64.4427	45.4299	54.4608	49.106	34.753	40.1937	48.3842	37.933	64.1322	36.4202	50.5526	42.0093	51.1585	42.1145	64.5472	47.1922	28.7886	38.4603	0.164152	0.197852
100	ENSG00000108798.4	<ABI3>	5.65795	4.98497	5.50066	5.83958	8.96907	1.60589	8.83427	5.04188	10.1871	3.73516	15.5518	5.49554	3.99668	11.118	12.9823	12.6037	12.8125	5.26697	7.13329	4.8662	0.0517403	-0.328399	-0.418582
101	ENSG00000154175.12	<ABI3BP>	128.674	90.0789	136.824	33.8108	84.0462	145.351	48.8842	261.818	94.3646	56.2522	288.956	140.453	122.691	105.981	100.251	160.836	72.3452	238.68	185.518	172.267	202.27	-0.799086	-0.594824
102	ENSG00000097007.13	<ABL1>	16.2007	13.7592	14.182	16.5512	12.0562	17.979	12.9372	7.81491	13.2931	12.537	15.6403	12.8934	18.1651	26.6436	16.195	15.8452	14.234	16.84	16.129	2.54454	17.4365	-0.245575	-0.311498
103	ENSG00000143322.15	<ABL2>	31.8918	16.5552	33.5278	28.1613	30.0308	16.6524	25.9484	16.17	22.9626	15.8399	12.2079	22.3168	15.2666	14.1943	15.7629	18.2478	20.5645	14.099	50.9169	9.3795	32.7861	0.617773	0.235625
104	ENSG00000099204.14	<ABLIM1>	94.0766	116.144	144.065	114.062	95.39	194.61	73.3355	173.189	99.6153	83.9547	116.878	152.801	238.433	159.07	43.099	263.515	158.337	125.673	98.6537	92.4949	209.151	-0.514194	-0.41457
105	ENSG00000163995.14	<ABLIM2>	20.5057	25.3847	19.8136	29.9235	79.9544	38.5589	27.7965	23.6608	36.2927	22.8952	17.7988	13.4394	30.3892	44.4179	18.3931	48.6798	52.8611	25.457	52.4279	58.8401	12.9006	-0.189308	-0.0665364
106	ENSG00000173210.15	<ABLIM3>	145.578	145.079	369.124	123.858	110.899	153.921	79.0094	97.0922	90.0753	111.692	76.8568	153.329	266.841	109.363	52.8498	74.402	93.4404	101.488	88.5863	62.6105	210.514	0.332325	0.236997
107	ENSG00000159842.10	<ABR>	101.509	85.2411	128.461	79.3526	67.8434	84.7284	84.8312	129.846	94.3646	58.6559	100.583	109.4	239.945	100.691	57.34	89.2367	91.2607	96.3282	90.765	51.0765	113.604	-0.178893	-0.223676
108	ENSG00000174429.3	<ABRA>	0	0	0	0	0	0	0	0	0	0	0	0	0	0	0	0	0	0	0	0	0	0	1
109	ENSG00000146386.7	<ABRACL>	0	0	0	0	0.986415	0	0	0	0.443721	0	0	0	1.1702	0	0	0	0	0	0.474381	0	0	0	-0.0111423
110	ENSG00000146109.3	<ABT1>	0	0	0	0	0	0	0	0	0	0	0	0	0	0	0	0	0	0	0	0	0	0	1
111	ENSG00000114626.13	<ABTB1>	283.688	308.13	283.77	274.391	142.245	230.812	205.221	384.443	359.765	362.138	373.155	285.838	284.268	279.388	232.009	193.499	327.553	347.942	213.489	206.943	204.512	0.0222026	0.15662
112	ENSG00000166016.4	<ABTB2>	4.04139	9.51007	6.86647	6.78981	5.66275	2.91505	4.39865	7.25671	10.6493	10.2198	7.32475	10.8325	4.01468	3.95785	5.26055	3.45125	8.45323	12.6479	5.20062	0.315746	3.67356	0.362326	0.203787
113	ENSG00000264194.1	<AC000003.2>	0	0	0	0	0	0	0	0	0	0	0	0	0	0	0	0	0	0	0	0	0	0	1
114	ENSG00000234469.2	<AC002365.1>	0	0	0	0	0	0	0	0	0	0	0	0	0	0	0	0	0	0	0	0	0	0	1
115	ENSG00000269449.1	<AC002451.1>	0	0	0	0	0	0	0	0	0	0	0	0	0	0	0	0	0	0	0	0	0	0	1
116	ENSG00000214921.2	<AC003102.1>	0	0	0	0	0	0	0	0	0	0	0	0	0	0	0	0	0	0	0	0	0	0	1
117	ENSG00000268069.1	<AC004466.1>	0	0	0	0	0	0	0	0	0	0	0	0	0	0	0	0	0	0	0	0	0	0	1
118	ENSG00000267970.1	<AC004899.1>	0	0	0	0	0	0	0	0	0	0	0	0	0	0	0	0	0	0	0	0	0	0	1
119	ENSG00000213888.2	<AC005003.1>	0	0	0	0	0	0	0	0	0	0	0	0	0	0	0	0	0	0	0	0	0	0	1
120	ENSG00000273452.1	<AC005358.1>	0	0	0	0	0	0	0	0	0	0	0	0	0	0	0	0	0	0	0	0	0	0	1
121	ENSG00000257040.1	<AC005477.1>	0	0	0	0	0	0	0	0	0	0	0	0	0	0	0	0	0	0	0	0	0	0	1
122	ENSG00000269205.1	<AC005606.1>	0	0	0	0	0	0	0	0	0	0	0	0	0	0	0	0	0	0	0	0	0	0	1
123	ENSG00000249034.1	<AC005609.1>	0	0	0	0	0	0	0	0	0	0	0	0	0	0	0	0	0	0	0	0	0	0	1
124	ENSG00000206044.3	<AC005841.1>	0	0	0	0	0	0	0	0	0	0	0	0	0	0	0	0	0	0	0	0	0	0	1
125	ENSG00000236669.1	<AC006372.1>	0	0	0	0	0	0	0	0	0	0	0	0	0	0	0	0	0	0	0	0	0	0	1
126	ENSG00000205821.4	<AC006435.1>	0	0	0	0	0	0	0	0	0	0	0	0	0	0	0	0	0	0	0	0	0	0	1
127	ENSG00000269094.1	<AC006449.1>	0	0	0	0	0	0	0	0	0	0	0	0	0	0	0	0	0	0	0	0	0	0	1
128	ENSG00000230000.1	<AC006455.1>	0	0	0	0	0	0	0	0	0	0	0	0	0	0	0	0	0	0	0	0	0	0	1
129	ENSG00000204957.1	<AC006486.1>	0	0	0	0	0	0	0	0	0	0	0	0	0	0	0	0	0	0	0	0	0	0	1
130	ENSG00000269446.1	<AC006967.1>	0	0	0	0	0	0	0	0	0	0	0	0	0	0	0	0	0	0	0	0	0	0	1
131	ENSG00000258881.2	<AC007040.11>	0.0351425	0.0367894	0	0.27643	0.200936	0.0872769	0.129372	0.252094	0.166395	0.259386	0.123848	0.211367	0.23404	0.0899512	0.131514	0.0381353	0.0947671	0.304553	0.0702787	0.11144	0.155221	0.0545394	0.0238449
132	ENSG00000269883.1	<AC007375.1>	0	0	0	0	0	0	0	0	0	0	0	0	0	0	0	0	0	0	0	0	0	0	1
133	ENSG00000166329.2	<AC007431.1>	0	0	0	0	0	0	0	0	0	0	0	0	0	0	0	0	0	0	0	0	0	0	1
134	ENSG00000267893.1	<AC007461.1>	0	0	0	0	0	0	0	0	0	0	0	0	0	0	0	0	0	0	0	0	0	0	1
135	ENSG00000214670.3	<AC007956.1>	0	0	0	0	0	0	0	0	0	0	0	0	0	0	0	0	0	0	0	0	0	0	1
136	ENSG00000267941.1	<AC008267.1>	0	0	0	0	0	0	0	0	0	0	0	0	0	0	0	0	0	0	0	0	0	0	1
137	ENSG00000233828.2	<AC008394.1>	0	0	0	0	0	0	0	0	0	0	0	0	0	0	0	0	0	0	0	0	0	0	1
138	ENSG00000268397.1	<AC008443.1>	0	0	0	0	0	0	0	0	0	0	0	0	0	0	0	0	0	0	0	0	0	0	1
139	ENSG00000269215.1	<AC008964.1>	0	0	0	0	0	0	0	0	0	0	0	0	0	0	0	0	0	0	0	0	0	0	1
140	ENSG00000224730.1	<AC009892.10>	0	0	0	0	0	0	0	0	0	0	0	0	0	0	0	0	0	0	0	0	0	0	1
141	ENSG00000269808.1	<AC010327.2>	0	0	0	0	0	0	0	0	0	0	0	0	0	0	0	0	0	0	0	0	0	0	1
142	ENSG00000214248.2	<AC010336.1>	0	0	0	0	0	0	0	0	0	0	0	0	0	0	0	0	0	0	0	0	0	0	1
143	ENSG00000269636.1	<AC010441.1>	0	0	0	0	0	0	0	0	0	0	0	0	0	0	0	0	0	0	0	0	0	0	1
144	ENSG00000226180.2	<AC010536.1>	0	0	0	0	0	0	0	0	0	0	0	0	0	0	0	0	0	0	0	0	0	0	1
145	ENSG00000268822.1	<AC011298.1>	0	0	0	0	0	0	0	0	0	0	0	0	0	0	0	0	0	0	0	0	0	0	1
146	ENSG00000204850.3	<AC011484.1>	0	0	0	0	0	0	0	0	0	0	0	0	0	0	0	0	0	0	0	0	0	0	1
147	ENSG00000213922.1	<AC011500.1>	0	0	0	0	0	0	0	0	0	0	0	0	0	0	0	0	0	0	0	0	0	0	1
148	ENSG00000265629.1	<AC011897.1>	0	0	0	0	0	0	0	0	0	0	0	0	0	0	0	0	0	0	0	0	0	0	1
149	ENSG00000233863.1	<AC012215.1>	0	0	0	0	0	0	0	0	0	0	0	0	0	0	0	0	0	0	0	0	0	0	1
150	ENSG00000269855.1	<AC012313.1>	0	0	0	0	0	0	0	0	0	0	0	0	0	0	0	0	0	0	0	0	0	0	1
151	ENSG00000268809.1	<AC012360.2>	0	0	0	0	0	0	0	0	0	0	0	0	0	0	0	0	0	0	0	0	0	0	1
152	ENSG00000269810.1	<AC015660.1>	0	0	0	0	0	0	0	0	0	0	0	0	0	0	0	0	0	0	0	0	0	0	1
153	ENSG00000205148.1	<AC016251.1>	0	0	0	0	0	0	0	0	0	0	0	0	0	0	0	0	0	0	0	0	0	0	1
154	ENSG00000268012.1	<AC016559.1>	0	0	0	0	0	0	0	0	0	0	0	0	0	0	0	0	0	0	0	0	0	0	1
155	ENSG00000205147.3	<AC016586.1>	0	0	0	0	0	0	0	0	0	0	0	0	0	0	0	0	0	0	0	0	0	0	1
156	ENSG00000222005.4	<AC016722.1>	0.175713	0.754183	0.561291	0.656521	0.0913347	0	0.53597	0.234087	0.22186	0	0.460008	1.2682	0.324055	0.215883	0.0751508	0.438556	0.208488	0.250808	0	0.798651	0.275948	-0.0920734	-0.149451
157	ENSG00000239332.1	<AC016722.2>	2.38969	2.81439	3.74194	1.27849	3.10538	5.42862	4.52803	3.33124	2.16314	2.14426	1.71619	1.12729	4.19471	3.18427	1.23999	1.44914	1.81953	4.04876	3.21525	3.52892	5.10504	-0.0906558	0.167532
158	ENSG00000238091.1	<AC016745.1>	0	0	0	0	0	0	0	0	0	0	0	0	0	0	0	0	0	0	0	0	0	0	1
159	ENSG00000186235.6	<AC016757.3>	12.1769	6.30939	5.08904	17.9679	13.0791	10.2114	6.72735	5.34799	6.82221	11.7243	9.00555	14.4082	0.486083	4.26369	2.47998	3.06989	2.61557	9.19032	8.99568	7.46646	5.46722	0.595557	0.582577
160	ENSG00000269679.1	<AC018445.1>	0	0	0	0	0	0	0	0	0	0	0	0	0	0	0	0	0	0	0	0	0	0	1
161	ENSG00000268241.1	<AC018470.1>	0	0	0	0	0	0	0	0	0	0	0	0	0	0	0	0	0	0	0	0	0	0	1
162	ENSG00000167765.3	<AC018755.1>	0	0	0	0	0	0	0	0	0	0	0	0	0	0	0	0	0	0	0	0	0	0	1
163	ENSG00000269210.1	<AC019171.1>	0	0	0	0	0	0	0	0	0	0	0	0	0	0	0	0	0	0	0	0	0	0	1
164	ENSG00000179066.6	<AC020907.1>	0	0	0	0	0	0	0	0	0	0	0	0	0	0	0	0	0	0	0	0	0	0	1
165	ENSG00000268953.1	<AC020952.1>	0	0	0	0	0	0	0	0	0	0	0	0	0	0	0	0	0	0	0	0	0	0	1
166	ENSG00000196355.2	<AC021860.1>	0	0	0	0	0	0	0	0	0	0	0	0	0	0	0	0	0	0	0	0	0	0	1
167	ENSG00000267964.1	<AC022400.2>	0	0	0	0	0	0	0	0	0	0	0	0	0	0	0	0	0	0	0	0	0	0	1
168	ENSG00000213132.2	<AC022498.1>	0	0	0	0	0	0	0	0	0	0	0	0	0	0	0	0	0	0	0	0	0	0	1
169	ENSG00000212997.1	<AC023632.1>	0	0	0	0	0	0	0	0	0	0	0	0	0	0	0	0	0	0	0	0	0	0	1
170	ENSG00000269282.1	<AC024257.1>	0	0	0	0	0	0	0	0	0	0	0	0	0	0	0	0	0	0	0	0	0	0	1
171	ENSG00000177340.4	<AC024940.1>	0	0	0	0	0	0	0	0	0	0	0	0	0	0	0	0	0	0	0	0	0	0	1
172	ENSG00000268028.1	<AC025262.1>	0	0	0	0	0	0	0	0	0	0	0	0	0	0	0	0	0	0	0	0	0	0	1
173	ENSG00000204752.3	<AC025278.1>	0	0	0	0	0	0	0	0	0	0	0	0	0	0	0	0	0	0	0	0	0	0	1
174	ENSG00000268509.1	<AC026202.1>	0	0	0	0	0	0	0	0	0	0	0	0	0	0	0	0	0	0	0	0	0	0	1
175	ENSG00000268885.1	<AC026740.1>	0	0	0	0	0	0	0	0	0	0	0	0	0	0	0	0	0	0	0	0	0	0	1
176	ENSG00000268838.1	<AC027228.1>	0	0	0	0	0	0	0	0	0	0	0	0	0	0	0	0	0	0	0	0	0	0	1
177	ENSG00000268798.1	<AC027307.3>	0	0	0	0	0	0	0	0	0	0	0	0	0	0	0	0	0	0	0	0	0	0	1
178	ENSG00000268553.1	<AC027309.1>	0	0	0	0	0	0	0	0	0	0	0	0	0	0	0	0	0	0	0	0	0	0	1
179	ENSG00000248235.2	<AC037459.4>	1.22999	0.790973	0.804518	3.54176	1.15082	0	0	1.3505	1.95977	0.916498	2.30004	0.880695	0	0.647649	1.39029	0	0.360115	2.31102	1.80968	0.260026	2.43179	0.151582	0.0349829
180	ENSG00000237102.2	<AC040160.1>	0	0	0	0	0	0	0	0	0	0	0	0	0	0	0	0	0	0	0	0	0	0	1
181	ENSG00000260415.3	<AC068987.1>	0	0	0	0	0	0	0	0	0	0	0	0	0	0	0	0	0	0	0	0	0	0	1
182	ENSG00000269165.1	<AC069547.1>	0	0	0	0	0	0	0	0	0	0	0	0	0	0	0	0	0	0	0	0	0	0	1
183	ENSG00000268170.1	<AC073342.1>	0	0	0	0	0	0	0	0	0	0	0	0	0	0	0	0	0	0	0	0	0	0	1
184	ENSG00000255863.1	<AC073610.5>	0	0	0	0	0	0	0	0	0	0	0	0	0	0	0	0	0	0	0	0	0	0	1
185	ENSG00000269657.1	<AC079210.1>	0	0	0	0	0	0	0	0	0	0	0	0	0	0	0	0	0	0	0	0	0	0	1
186	ENSG00000226757.1	<AC079341.1>	0	0	0	0	0	0	0	0	0	0	0	0	0	0	0	0	0	0	0	0	0	0	1
187	ENSG00000182329.6	<AC079354.1>	0.263569	0.165552	0.168387	0	0	0.174554	0.0184817	0.0720269	0.0184884	0.0864621	0.176926	0	0	0.071961	0	0	0	0.161234	0.0702787	0.0185733	0.258701	0.159625	0.222158
188	ENSG00000272214.1	<AC079602.1>	0	0	0	0	0	0	0	0	0	0	0	0	0	0	0	0	0	0	0	0	0	0	1
189	ENSG00000196758.3	<AC079612.1>	0	0	0	0	0	0	0	0	0	0	0	0	0	0	0	0	0	0	0	0	0	0	1
190	ENSG00000232941.1	<AC090186.1>	0	0	0	0	0	0	0	0	0	0	0	0	0	0	0	0	0	0	0	0	0	0	1
191	ENSG00000269197.1	<AC090574.1>	0	0	0	0	0	0	0	0	0	0	0	0	0	0	0	0	0	0	0	0	0	0	1
192	ENSG00000268960.1	<AC091150.1>	0	0	0	0	0	0	0	0	0	0	0	0	0	0	0	0	0	0	0	0	0	0	1
193	ENSG00000217455.4	<AC091801.1>	0	0.128763	0	0	0	0	0	0	0	0	0.26539	0	0.792135	0	0	0	0.303255	0	0.614939	0	0	0	-0.573371
194	ENSG00000269049.1	<AC092291.2>	0	0	0	0	0	0	0	0	0	0	0	0	0	0	0	0	0	0	0	0	0	0	1
195	ENSG00000267819.1	<AC092850.1>	0	0	0	0	0	0	0	0	0	0	0	0	0	0	0	0	0	0	0	0	0	0	1
196	ENSG00000269175.1	<AC093157.1>	0	0	0	0	0	0	0	0	0	0	0	0	0	0	0	0	0	0	0	0	0	0	1
197	ENSG00000268791.1	<AC093323.1>	0	0	0	0	0	0	0	0	0	0	0	0	0	0	0	0	0	0	0	0	0	0	1
198	ENSG00000269559.1	<AC093677.1>	0	0	0	0	0	0	0	0	0	0	0	0	0	0	0	0	0	0	0	0	0	0	1
199	ENSG00000220256.3	<AC093802.1>	0	0	0	0	0	0	0	0	0	0	0	0	0	0	0	0	0	0	0	0	0	0	1
200	ENSG00000269690.1	<AC096677.1>	0	0	0	0	0	0	0	0	0	0	0	0	0	0	0	0	0	0	0	0	0	0	1
201	ENSG00000268626.1	<AC103809.2>	0	0	0	0	0	0	0	0	0	0	0	0	0	0	0	0	0	0	0	0	0	0	1
202	ENSG00000214919.2	<AC104472.1>	0	0	0	0	0	0	0	0	0	0	0	0	0	0	0	0	0	0	0	0	0	0	1
203	ENSG00000203392.2	<AC105020.1>	0	0	0	0	0	0	0	0	0	0	0	0	0	0	0	0	0	0	0	0	0	0	1
204	ENSG00000230493.2	<AC106017.1>	0	0	0	0	0	0	0	0	0	0	0	0	0	0	0	0	0	0	0	0	0	0	1
205	ENSG00000222001.2	<AC106876.2>	0	0	0	0	0	0	0	0	0	0	0	0	0	0	0	0	0	0	0	0	0	0	1
206	ENSG00000269302.1	<AC110771.1>	0	0	0	0	0	0	0	0	0	0	0	0	0	0	0	0	0	0	0	0	0	0	1
207	ENSG00000269506.1	<AC110792.1>	0	0	0	0	0	0	0	0	0	0	0	0	0	0	0	0	0	0	0	0	0	0	1
208	ENSG00000269360.1	<AC112693.2>	0	0	0	0	0	0	0	0	0	0	0	0	0	0	0	0	0	0	0	0	0	0	1
209	ENSG00000212768.2	<AC114546.1>	0	0	0	0	0	0	0	0	0	0	0	0	0	0	0	0	0	0	0	0	0	0	1
210	ENSG00000204620.2	<AC115618.1>	0	0	0	0	0	0	0	0	0	0	0	0	0	0	0	0	0	0	0	0	0	0	1
211	ENSG00000269402.1	<AC116407.2>	0	0	0	0	0	0	0	0	0	0	0	0	0	0	0	0	0	0	0	0	0	0	1
212	ENSG00000268175.1	<AC117395.1>	0	0	0	0	0	0	0	0	0	0	0	0	0	0	0	0	0	0	0	0	0	0	1
213	ENSG00000175911.4	<AC127496.1>	0	0	0	0	0	0	0	0	0	0	0	0	0	0	0	0	0	0	0	0	0	0	1
214	ENSG00000183562.2	<AC131971.1>	0	0	0	0	0	0	0	0	0	0	0	0	0	0	0	0	0	0	0	0	0	0	1
215	ENSG00000247270.2	<AC132186.1>	0	0	0	0	0	0	0	0	0	0	0	0	0	0	0	0	0	0	0	0	0	0	1
216	ENSG00000268403.1	<AC132192.1>	0	0	0	0	0	0	0	0	0	0	0	0	0	0	0	0	0	0	0	0	0	0	1
217	ENSG00000184566.2	<AC132216.1>	0	0	0	0	0	0	0	0	0	0	0	0	0	0	0	0	0	0	0	0	0	0	1
218	ENSG00000268852.1	<AC132872.2>	0	0	0	0	0	0	0	0	0	0	0	0	0	0	0	0	0	0	0	0	0	0	1
219	ENSG00000268863.1	<AC135048.1>	0	0	0	0	0	0	0	0	0	0	0	0	0	0	0	0	0	0	0	0	0	0	1
220	ENSG00000198150.2	<AC135178.1>	0	0	0	0	0	0	0	0	0	0	0	0	0	0	0	0	0	0	0	0	0	0	1
221	ENSG00000267950.1	<AC136297.1>	0	0	0	0	0	0	0	0	0	0	0	0	0	0	0	0	0	0	0	0	0	0	1
222	ENSG00000228259.2	<AC136604.1>	0	0	0	0	0	0	0	0	0	0	0	0	0	0	0	0	0	0	0	0	0	0	1
223	ENSG00000267824.1	<AC137056.1>	0	0	0	0	0	0	0	0	0	0	0	0	0	0	0	0	0	0	0	0	0	0	1
224	ENSG00000268218.1	<AC137932.1>	0	0	0	0	0	0	0	0	0	0	0	0	0	0	0	0	0	0	0	0	0	0	1
225	ENSG00000269563.1	<AC138655.1>	0	0	0	0	0	0	0	0	0	0	0	0	0	0	0	0	0	0	0	0	0	0	1
226	ENSG00000233812.2	<AC139426.2>	0	0	0	0	0	0	0	0	0	0	0	0	0	0	0	0	0	0	0	0	0	0	1
227	ENSG00000269529.1	<AC140061.12>	0	0	0	0	0	0	0	0	0	0	0	0	0	0	0	0	0	0	0	0	0	0	1
228	ENSG00000269396.1	<AC187652.1>	0	0	0	0	0	0	0	0	0	0	0	0	0	0	0	0	0	0	0	0	0	0	1
229	ENSG00000060971.13	<ACAA1>	176.503	195.536	131.174	165.512	150.666	165.407	158.019	174.971	197.16	178.423	167.779	155.038	128.614	167.687	150.17	139.423	147.78	168.328	156.599	134.452	127.522	0.180424	0.791896
230	ENSG00000167315.13	<ACAA2>	53.8032	56.7477	65.6337	46.0947	61.0298	59.8545	65.1112	88.431	60.5124	59.6415	72.2036	62.5117	71.1481	67.7333	70.266	189.552	74.9608	68.2735	48.1233	88.5759	58.0526	-0.221752	-0.443555
231	ENSG00000132142.15	<ACACA>	38.2175	45.1222	25.4265	32.7051	50.8552	47.4088	44.8737	41.6135	48.5874	35.2938	29.8652	42.2205	25.6364	44.4359	38.5523	38.4404	27.8805	42.7807	76.8498	20.7649	34.8557	0.167803	0.154962
232	ENSG00000076555.11	<ACACB>	67.7548	85.4618	66.4195	80.9075	109.62	167.554	43.3766	203.08	118.363	60.0393	60.2434	96.5242	462.661	168.964	25.8143	391.555	64.4227	91.5449	163.257	38.7438	181.039	-0.21338	-0.383143
233	ENSG00000111271.10	<ACAD10>	28.9399	20.1238	20.9549	38.8384	25.5737	21.3828	13.6395	20.4016	17.6009	24.4861	26.769	30.1022	16.3648	21.1026	15.4811	21.1842	18.707	29.3983	20.3457	11.794	22.9727	0.0044211	0.210909
234	ENSG00000240303.3	<ACAD11>	89.7013	36.7526	52.0504	89.546	71.4603	88.1147	33.7107	63.7438	44.5939	53.7275	78.4491	68.888	67.1154	77.358	50.5952	46.6776	39.2146	58.4562	72.7385	52.7481	86.7857	-0.190887	-0.0458032
235	ENSG00000151498.7	<ACAD8>	51.765	43.2644	37.3633	69.2629	63.8064	77.6764	45.1509	45.7551	42.3384	53.693	53.1841	46.7825	42.3972	67.8772	50.3886	32.5294	39.6316	49.7496	64.7267	26.5041	38.1671	0.0591101	0.354968
236	ENSG00000177646.13	<ACAD9>	30.1523	27.7208	17.3065	28.4377	23.5096	25.7118	24.8579	29.6931	29.6369	24.659	28.379	28.2879	19.7134	29.7918	20.0089	13.5571	19.7874	24.0776	38.2668	18.0532	27.9397	0.147128	0.227576
237	ENSG00000115361.3	<ACADL>	23.0008	46.0052	51.2085	17.2596	35.1456	54.7051	16.7629	81.6785	57.7762	18.2089	14.3664	21.4185	84.2003	59.9435	8.21022	47.4404	35.0449	20.7096	10.7351	15.4344	43.755	0.906125	0.226588
238	ENSG00000117054.9	<ACADM>	64.0121	48.139	70.3111	44.4015	57.2669	35.6962	57.3488	42.2978	58.1829	50.148	46.9386	71.0192	54.2432	59.008	55.0291	101.612	49.4684	79.4524	46.8759	27.5999	30.5957	-0.0141899	-0.15786
239	ENSG00000122971.4	<ACADS>	7.80164	5.07694	7.18453	9.50227	5.22434	4.20675	5.23033	5.76215	4.64058	9.09581	5.39625	8.71888	12.2421	6.44051	7.28962	4.97666	5.89452	6.66433	8.04691	3.43606	11.4174	-0.256773	-0.289508
240	ENSG00000196177.8	<ACADSB>	20.8747	6.91641	8.68131	12.7503	10.741	14.7323	3.04949	18.9611	7.02558	12.952	12.0664	25.7339	17.733	16.7309	9.95748	10.1821	6.59579	12.2538	10.454	6.09203	16.9363	-0.0373002	-0.186488
241	ENSG00000072778.15	<ACADVL>	945.317	980.493	1133.17	1532.61	1400.43	1389.85	1132.02	1355.4	1040.17	1227.64	1303.03	1155.24	1080.74	1201.06	1747.71	1231.12	1112.47	952.73	1443.19	671.87	1181.64	-0.00151098	0.0729948
242	ENSG00000157766.11	<ACAN>	1.5287	2.11539	5.12646	6.4961	4.60327	2.09464	53.0796	2.62898	2.2186	1.12401	5.59087	17.8253	11.72	5.43305	3.49451	32.8155	9.49567	1.73774	8.66185	4.82905	8.29569	-1.58896	-0.104016
243	ENSG00000072818.7	<ACAP1>	42.2589	43.0068	22.8259	27.0556	24.5508	26.5496	44.9106	23.4627	44.7049	54.1599	37.5968	29.4504	31.2893	28.3166	27.6743	12.127	38.0774	33.4829	39.5669	42.96	35.6318	0.0490136	0.208597
244	ENSG00000114331.8	<ACAP2>	4.5861	2.97994	2.99355	5.90869	6.33863	4.25911	0.757751	2.71901	2.66233	4.08101	3.00775	8.03194	5.32891	3.72398	1.05211	3.45125	3.31685	3.31425	3.68963	0.650065	4.00125	0.0310763	0.0515308
245	ENSG00000131584.14	<ACAP3>	171.671	145.907	86.2518	219.779	137.276	94.8525	131.054	114.127	141.196	170.901	222.131	200.746	114.337	152.737	163.641	71.847	113.171	228.002	177.313	55.7012	149.909	-0.133064	-0.124908
246	ENSG00000075239.9	<ACAT1>	39.6759	30.8295	28.0459	46.5784	40.6805	43.9526	28.7021	37.562	30.7092	55.4395	28.2198	30.2959	21.9637	36.5382	11.6108	34.0358	30.098	36.6896	37.7397	30.3859	57.9836	0.340921	0.408144
247	ENSG00000120437.7	<ACAT2>	33.2624	53.8965	19.7388	26.5027	34.3418	52.1741	90.7638	45.7371	73.066	35.7261	25.6366	33.5721	21.3156	39.5785	53.8267	46.6776	50.2455	46.3995	32.9783	99.497	32.7171	0.0409204	0.0875981
248	ENSG00000182827.8	<ACBD3>	1.17727	0	0	1.43398	1.82669	0	0	0	2.68081	2.24801	3.46776	2.0256	2.17837	0	0	0	2.72929	0	6.94002	0	1.50047	-0.877814	-0.322164
249	ENSG00000181513.10	<ACBD4>	69.2484	49.7577	43.9304	50.8976	38.8538	54.4957	39.477	61.2768	44.5015	49.5082	71.2129	64.7839	42.5412	52.1357	39.116	33.7498	36.7317	73.3255	40.0237	37.8709	43.893	0.220039	0.087893
250	ENSG00000107897.14	<ACBD5>	31.7337	27.776	37.6439	26.0881	23.8566	36.1152	26.1517	24.3271	31.9849	27.5122	19.6565	30.93	22.8099	27.651	29.3088	31.3663	27.3308	35.9014	16.4628	22.5294	16.9708	0.0161493	0.475765
251	ENSG00000135847.5	<ACBD6>	3.65482	2.13379	10.1407	7.11807	19.5639	1.65826	0.369635	21.0318	6.41546	13.8512	8.33323	16.8037	11.0539	8.68929	17.5665	4.29022	6.3873	2.23936	6.58863	5.86915	24.2662	-0.281628	-0.159836
252	ENSG00000176244.6	<ACBD7>	0	0	0	0	0	0	0	0	0	0.795451	0	0	0	0	0	0	1.49732	0	0.491951	0	0	0	-0.190655
253	ENSG00000110455.9	<ACCS>	163.87	96.3699	94.3905	47.8742	47.2383	65.7719	68.2346	114.037	95.5849	68.8238	111.729	118.63	199.582	55.7158	45.2595	81.1711	46.3601	126.604	102.466	56.3699	159.239	-0.326593	-0.231067
254	ENSG00000205126.2	<ACCSL>	0	0.0735788	0	0	0	0	0.0924087	0	0	0	0	0	0	0.323824	0	0	0	0	0	0	0	0	-0.112961
255	ENSG00000102977.9	<ACD>	63.9946	62.2661	49.562	75.9145	68.154	68.6345	52.5805	52.8857	53.1541	77.1242	67.0905	74.5772	46.1779	72.3208	69.0448	36.915	64.4606	67.8436	63.163	88.3531	45.359	-0.0871054	-0.0434898
256	ENSG00000159640.10	<ACE>	4.41039	8.6823	11.3007	4.95846	8.45759	9.583	6.89369	12.4426	8.61558	5.51628	23.3366	17.5434	24.9522	7.89772	3.23148	6.9025	9.77997	15.0306	10.3485	3.38034	14.5735	-0.263651	-0.557518
257	ENSG00000130234.6	<ACE2>	0.316283	0.551841	0.149678	0.794736	0	1.02987	0.665343	0.0540201	0	0.587942	0.26539	0	0.324055	0	0.0751508	2.536	0.454882	0.0358297	0	0.0742931	0	0.701731	0.0888233
258	ENSG00000167769.4	<ACER1>	0	0	0	0	0	0	0	0	0	0	0	0	0	0	0	0	0	0	0	0	0	0	1
259	ENSG00000177076.4	<ACER2>	0.579852	0.110368	0.187097	1.4167	0.639343	0	0.129372	0.666248	0	0.276679	0.353853	0.563645	2.14236	0.521717	0.394541	0.743639	0.60651	1.18238	0	0.148586	0	-0.481301	-0.269444
260	ENSG00000078124.7	<ACER3>	29.3264	18.8914	14.6684	31.6339	22.8519	25.4499	21.1801	23.5528	22.186	37.6629	20.3288	28.3408	21.6217	29.2162	21.9064	24.1397	19.3704	26.944	24.0353	18.7219	22.6622	0.0332564	0.179777
261	ENSG00000087085.9	<ACHE>	1.33542	0.827762	2.48839	2.10778	1.86323	3.19433	1.21979	0.738275	1.40512	3.23368	2.6362	2.0256	3.24055	1.99692	1.69089	0.781774	1.85744	2.34685	1.35287	1.00296	3.77704	-0.226471	-0.173597
262	ENSG00000100813.10	<ACIN1>	342.06	252.596	248.259	450.218	372.152	313.603	222.095	305.754	247.079	325.772	330.728	356.981	304.27	348.795	239.675	213.901	273.725	297.172	395.265	192.865	260.702	0.0593772	0.167932
263	ENSG00000144648.10	<ACKR2>	11.8957	25.9181	19.9258	12.232	18.9245	16.7397	9.75836	31.1156	24.4971	8.30036	18.8073	13.3689	14.1684	26.7335	11.0847	20.4024	24.1088	12.3971	27.4263	34.0077	26.0426	-0.189295	-0.267266
264	ENSG00000144476.5	<ACKR3>	20.8922	67.6925	28.0833	19.0737	17.7555	15.4829	17.9273	64.41	18.7472	26.786	69.7974	64.5725	27.3467	9.84066	20.5349	77.6245	40.2002	45.5396	65.2011	2.9903	47.67	-1.16845	-0.412116
265	ENSG00000129048.6	<ACKR4>	0	0	0.467743	0	0	0	0	0	0	0	0	0	0	1.04343	0	0	0	0	0	0	0	0	-0.135047
266	ENSG00000131473.12	<ACLY>	26.1812	39.9717	33.8272	32.5496	62.7652	27.3002	42.97	35.0231	49.2345	21.5809	40.18	43.5416	34.7459	55.1401	44.8462	45.5336	65.1429	48.9613	157.407	3.86324	48.9118	-0.398422	-0.412372
267	ENSG00000153086.9	<ACMSD>	0.667708	0.441473	0.67355	0.483752	0.219203	0.48875	0.369635	0.234087	0.295814	0.380433	0.283082	1.07445	0.504086	0	0.112726	0.152541	0.265348	0.519531	0.404103	0	0.275948	0.231417	0.289273
268	ENSG00000196636.7	<ACN9>	21.0152	18.5419	22.5452	21.5788	16.3854	25.4848	20.4593	13.433	32.2807	16.7564	20.7181	22.2287	10.1717	20.5269	24.2173	23.1291	26.7243	21.9457	12.5096	23.0123	15.3324	-0.0798418	0.108472
269	ENSG00000122729.14	<ACO1>	32.3136	36.6423	33.8272	34.1564	68.7202	29.2727	34.2651	43.2701	50.9724	30.9016	46.4786	38.592	51.3627	52.6395	34.0809	123.749	41.7923	47.4565	84.7561	29.0115	35.8732	-0.43662	-0.457503
270	ENSG00000100412.11	<ACO2>	6.34323	7.13715	9.29873	13.0959	11.7091	7.61054	9.33328	4.8258	6.00872	7.43574	4.17546	6.04157	6.4631	8.86919	12.3247	7.74147	4.92789	7.61382	10.0674	3.17603	10.5033	-0.0162133	0.217368
271	ENSG00000184227.3	<ACOT1>	0.333854	0	0	0.639244	1.77189	2.75795	0.572934	1.15243	0	0.103755	1.34464	2.57163	0.504086	0	2.87452	1.86863	0	2.59765	0	0.204306	0.74161	-0.381068	-0.286996
272	ENSG00000162390.13	<ACOT11>	7.37993	2.46489	2.99355	8.15468	7.72692	6.75523	3.06797	4.62773	3.25395	2.88783	3.50314	7.15124	1.63828	3.07633	3.58845	1.04872	2.27441	5.60735	2.67059	1.72731	3.27688	0.312352	0.581708
273	ENSG00000172497.4	<ACOT12>	0	0	0	0.224599	0.511474	1.11714	0.258744	0.180067	0	0.397726	0	0.475575	0.522089	0.0899512	0	0.152541	0.151627	0.0716594	0	0	0	0.297	0.343715
274	ENSG00000112304.6	<ACOT13>	25.6892	19.9031	19.1775	25.7598	17.792	23.6346	20.8289	18.1148	23.1659	23.3448	18.6303	17.0503	15.5907	15.1118	26.4155	31.1375	15.6555	25.0987	11.8947	19.6691	18.4368	0.248569	0.344064
275	ENSG00000119673.10	<ACOT2>	4.79696	5.44483	9.37357	27.4011	7.89132	13.1614	2.97556	5.6361	4.14139	11.0671	11.4825	6.72851	22.7559	9.24699	5.84297	40.3472	7.94149	12.1284	5.60473	5.9063	11.6243	-0.424249	-0.277139
276	ENSG00000177465.4	<ACOT4>	0	0	0	0	0	0	0	0	0	0	0	0	0	0	0	0	0	0	0	0	0	0	1
277	ENSG00000205669.2	<ACOT6>	0	0	0.149678	0	0.164402	0	0	0.306114	0.0184884	0	0	0	0	0	0	0.133474	0	0	0	0	0.534649	0	0.0211556
278	ENSG00000097021.15	<ACOT7>	35.3358	79.9802	22.7884	56.1498	63.8247	65.5449	47.073	55.2446	76.7452	64.5526	49.9817	40.4063	22.9359	55.5899	86.01	58.1564	55.8937	36.9046	34.9461	66.8266	22.369	0.260871	0.327212
279	ENSG00000101473.12	<ACOT8>	28.729	40.3948	34.8562	43.3995	21.7742	31.1928	35.8546	41.0553	45.9806	44.8047	37.013	36.267	45.4397	33.6597	38.3645	27.4574	33.2064	38.6603	32.1349	30.7202	39.0811	0.0711109	0.126637
280	ENSG00000123130.12	<ACOT9>	69.7931	60.0771	57.6446	56.6336	78.2921	95.446	57.7924	77.4649	68.0742	48.73	70.4167	76.7438	71.9222	75.0913	57.2273	81.6096	61.6934	52.0427	78.6419	53.9554	68.5041	-0.135135	-0.0575459
281	ENSG00000161533.7	<ACOX1>	9.2952	12.2325	10.702	13.1822	11.8735	9.39099	8.7049	15.8819	16.3807	12.658	14.1364	12.1536	13.9704	8.40144	8.86779	17.0846	10.0264	13.5436	7.81851	11.7197	14.2631	-0.0115148	0.00823287
282	ENSG00000168306.8	<ACOX2>	65.3124	54.3564	48.6453	58.8623	46.0692	47.7754	36.3905	57.0633	53.6348	60.4716	67.5682	99.5537	62.7587	63.1098	66.7339	38.2879	48.7482	72.9135	65.4822	43.5915	139.164	-0.275938	-0.576088
283	ENSG00000087008.11	<ACOX3>	23.5279	12.3796	14.6684	18.4517	17.8285	18.8343	14.8593	16.9263	10.335	14.5775	21.4081	17.8077	19.1013	20.221	7.85325	25.6269	20.6592	16.9295	21.8391	19.0005	19.0059	-0.257882	-0.487213
284	ENSG00000153093.14	<ACOXL>	0.14057	0.0367894	0.187097	0	0	0	0.0554452	0.0540201	0	0	0.159234	0	0.0720123	0.0359805	0.0939385	0.0381353	0.0379069	0.143319	0.105418	0.0371465	0.0517403	-0.0899383	-0.262747
285	ENSG00000143727.11	<ACP1>	98.6451	67.0303	81.1066	72.5801	90.7867	130.636	76.7362	73.8095	62.3613	79.8737	72.8583	58.1963	106.614	95.2943	79.115	53.5801	66.2991	81.7634	86.1617	64.3007	79.3006	-0.0147538	0.263708
286	ENSG00000134575.5	<ACP2>	13.8462	10.7425	11.8433	12.0593	8.58546	13.3185	12.1425	16.6742	13.6074	10.3582	10.9694	15.0775	12.2961	28.3706	6.19994	11.555	11.0688	10.104	11.0513	8.72944	9.52021	0.125465	0.00827654
287	ENSG00000102575.6	<ACP5>	7.59079	6.84283	345.419	2.28055	7.14237	14.0341	8.74186	8.55319	3.19849	3.23368	8.31554	5.77736	11.1619	11.8196	6.23751	5.93004	6.0651	3.88752	5.92098	7.93079	3.70805	0.26092	0.314752
288	ENSG00000162836.7	<ACP6>	113.581	58.4584	73.7911	77.2794	66.4186	55.6303	48.071	36.2115	31.726	35.2592	57.3949	54.9906	30.3892	36.0884	35.1518	31.0803	27.255	51.2723	29.9036	38.8739	59.1736	0.653286	0.672477
289	ENSG00000155893.7	<ACPL2>	9.1722	8.51675	17.2504	13.8215	7.23371	11.3285	13.0111	13.343	9.94674	11.5859	16.2772	17.6667	8.19139	11.2259	12.2684	7.77961	8.49113	15.7292	9.24165	10.531	9.76166	0.116314	-0.00837009
290	ENSG00000014257.11	<ACPP>	1.58141	0.110368	0.523872	0.967504	1.58922	0.925135	0.554452	0.684255	1.66395	0.985668	0.796169	2.55402	0.288049	0.287844	0.582418	0.610165	0.473836	0.322467	0.790636	1.05868	0	0.418128	0.296015
291	ENSG00000142513.4	<ACPT>	0	0	0	0	0	0	0	0	0	0	0	0	0.23404	0	0	0	0	0	0	0	0	0	-0.283325
292	ENSG00000100312.6	<ACR>	1.0367	0.220737	2.80646	0.172769	2.92271	0	1.29372	2.1428	0	2.88783	1.29156	0.387506	12.7822	1.16937	0.864234	1.20126	0.852904	0.824084	2.49489	0.11144	15.1599	-0.00359325	-0.372248
293	ENSG00000111644.3	<ACRBP>	2.14369	1.54516	3.62968	5.80503	0.493207	4.73041	2.79074	3.7454	4.19686	4.84188	3.94546	1.44434	2.52043	1.51118	1.46544	0.591098	3.01359	2.34685	0.456812	1.50444	1.24177	1.06291	0.807203
294	ENSG00000147174.7	<ACRC>	8.57478	5.9231	7.55873	15.1173	10.7775	13.3883	10.4607	11.9024	8.07942	9.82209	8.82862	9.33537	8.85751	17.4505	6.51933	7.30292	5.70498	10.8027	10.8932	8.97089	8.10597	0.185489	0.195181
295	ENSG00000134940.9	<ACRV1>	0.404139	0.202342	0	0.397368	0.858546	0	0	0	0.184884	0	0.194619	0.193753	1.44025	0	0	0	0	0	0	0	0	0.244745	0.0767162
296	ENSG00000103740.5	<ACSBG1>	0.193284	0	0.261936	0	0	0.558572	0.258744	0.234087	0	0.708989	0.796169	0.616486	0.216037	0	0.206665	0.343218	0	1.05698	0.509521	0	0.258701	-0.0882433	-0.330684
297	ENSG00000130377.9	<ACSBG2>	0.122999	0.0735788	0.205807	1.69313	0.803745	0	0	0.486181	1.05384	0.743574	1.39772	0.757398	2.70046	0	0.413329	0.381353	0.701277	0.465786	0.316254	0.520052	0.068987	-0.191057	-0.193559
298	ENSG00000167107.8	<ACSF2>	50.8864	41.6824	49.8614	51.1913	34.3418	91.6756	59.2709	57.3694	42.93	56.5289	66.1351	76.3562	95.2002	67.6073	42.3099	34.646	26.7812	44.823	32.4688	59.6016	81.7496	-0.221743	-0.127949
299	ENSG00000176715.11	<ACSF3>	38.9731	51.358	54.7633	55.8388	44.9732	58.3882	51.4901	52.7237	48.7353	45.5309	41.9492	41.375	44.9897	47.5482	36.3354	34.7222	51.7049	47.7968	55.2039	52.6924	39.9262	0.190865	0.600879
300	ENSG00000151726.9	<ACSL1>	122.419	70.2862	122.904	159.12	139.669	153.345	211.172	123.04	164.972	116.828	86.4462	72.4107	255.842	222.881	182.729	564.594	84.7029	82.8741	254.304	211.977	95.754	-0.474702	-0.362878
301	ENSG00000123983.9	<ACSL3>	31.0836	32.4115	48.7014	25.4488	28.9348	30.9309	52.673	32.7002	38.1785	14.0933	28.5913	52.419	29.381	30.0077	33.7991	33.807	25.1891	29.6849	38.8466	26.7269	40.6334	0.0800138	-0.00270334
302	ENSG00000068366.15	<ACSL4>	18.4498	12.8027	31.0394	23.3583	24.9709	31.7688	17.8164	18.3849	16.8244	15.5459	19.1965	22.3168	31.6494	26.6436	17.4162	37.8303	23.5591	22.2682	52.8145	12.7227	20.7478	-0.270388	-0.388015
303	ENSG00000197142.6	<ACSL5>	4.53339	13.6857	9.44841	10.3316	21.4637	17.2459	13.5102	14.8015	13.2931	15.3211	17.9226	12.8405	11.0719	20.6888	1.69089	29.593	22.2513	16.2488	17.1129	13.5213	7.55408	-0.248575	-0.242546
304	ENSG00000164398.8	<ACSL6>	0.527138	0.588631	0.467743	0.362814	0.23747	2.25174	0.0924087	0.504188	0.332791	0.484188	0.920017	0.915923	0.88215	0.305834	0.187877	0.24788	0.322208	0.250808	0.333824	0.315746	1.10379	0.247326	0.0858074
305	ENSG00000166743.5	<ACSM1>	1.0367	0.588631	0.449033	0.915674	0.365339	0.785492	0.221781	0.270101	0.388256	0.916498	0.300775	0.457961	0.216037	0.287844	0.319391	0.228812	1.32674	0.519531	0.790636	0.427185	0.655377	0.135987	0.207384
306	ENSG00000183747.7	<ACSM2A>	0.228426	0.404684	0.0374194	0.120938	0	0	0.147854	0.216081	0.0369767	0.207509	0.300775	0.0704556	0.756129	0.179902	0.169089	0	0	0.125404	0	1.3187	0.0862338	0.0205951	-0.308323
307	ENSG00000066813.10	<ACSM2B>	0.193284	0.220737	0.505162	0	0.200936	0	0.203299	0	0.0739535	0	0.212312	0	0.810138	0	0.0751508	0	0.0379069	0.107489	0	0.185733	0.362182	0.139675	-0.0753085
308	ENSG00000005187.7	<ACSM3>	2.31941	4.41473	8.83099	0.673798	1.66229	7.92474	2.60593	4.62773	2.90267	0.311264	7.55475	2.30742	1.20621	8.16757	2.12301	1.90677	3.84755	3.78004	0.386533	2.56311	3.01818	0.0873491	0.0734873
309	ENSG00000215009.5	<ACSM4>	0	0	0	0	0	0	0	0	0	0	0	0	0	0	0	0	0	0	0	0	0	0	1
310	ENSG00000183549.6	<ACSM5>	12.5459	6.36457	14.2194	20.0757	9.42574	7.52327	10.3498	14.5494	15.1605	11.3438	10.5094	7.92625	38.2205	19.0517	5.3357	9.95332	7.78986	15.4605	12.9664	7.96793	11.0207	0.17681	-0.113482
311	ENSG00000154930.10	<ACSS1>	30.4686	14.3847	13.5271	22.4254	26.0121	31.3673	14.7299	20.4196	14.2915	23.0681	18.3119	24.7828	10.6398	27.3991	10.0138	8.00842	11.2394	20.0109	23.5434	6.9464	20.6789	0.220768	0.457191
312	ENSG00000131069.15	<ACSS2>	123.93	115.022	80.4705	131.978	141.916	133.761	117.71	122.086	145.3	88.4161	109.517	108.185	205.325	176.071	99.2742	145.963	96.037	93.2468	230.338	128.564	104.326	0.166871	-0.306925
313	ENSG00000111058.3	<ACSS3>	63.1863	26.7091	35.9039	41.9309	49.8322	80.8184	26.7985	32.9703	30.1915	28.6881	31.5283	41.9035	23.638	43.1406	26.6973	39.8324	31.5764	35.0236	29.7103	27.6928	39.7883	0.123248	0.417737
314	ENSG00000143632.10	<ACTA1>	10.1035	8.20404	10.3839	6.18512	7.79998	219.624	29.0718	20.4916	23.1659	11.1536	19.1434	93.6707	2.73647	34.7931	34.5318	12.0317	26.042	23.1281	3.03955	10.9397	34.666	-1.06818	0.111599
315	ENSG00000107796.8	<ACTA2>	71.8313	83.3648	100.509	320.227	121.292	126.866	72.6517	96.6961	54.3558	88.3988	292.672	418.594	579.321	98.0648	34.1936	153.971	111.787	113.974	81.2422	33.7105	167.449	-0.298986	-0.403138
316	ENSG00000075624.9	<ACTB>	761.609	529.676	469.109	1322.84	678.379	955.088	972.879	684.903	426.749	696.504	985.922	1326.64	1957.26	1007.51	445.926	988.62	752.735	658.084	1006.04	2338.9	813.685	-0.517035	-0.585362
317	ENSG00000169067.2	<ACTBL2>	0	0	0	0	0	0	0	0	0	0	0	0	0	0	0	0	0	0	0	0	0	0	1
318	ENSG00000159251.6	<ACTC1>	1.51113	3.99165	4.4342	12.8713	0.347072	9.02443	49.2538	6.32036	3.54977	0.708989	20.3288	16.1343	6.80516	4.02981	1.35271	18.8961	10.8414	4.20999	31.7133	0.482905	19.4543	-1.2669	-0.170315
319	ENSG00000184009.5	<ACTG1>	929.994	937.781	651.454	1173.72	733.984	743.25	925.732	902.082	813.045	907.195	1113.75	1386.43	777.552	1070.85	790.605	590.602	984.308	922.759	815.303	482.422	545.394	0.149917	0.0325447
320	ENSG00000163017.9	<ACTG2>	6.27294	25.6974	14.1445	23.6002	6.7953	2.72304	56.3878	11.4883	18.2295	9.68375	25.7605	74.9471	73.4525	1.25932	2.93088	112.404	10.9361	16.9654	9.61061	6.35206	191.836	-0.391292	-0.486746
321	ENSG00000182584.4	<ACTL10>	0	0	0	0	0	0	0	0	0	0	0	0	0	0	0	0	0	0	0	0	0	0	1
322	ENSG00000136518.12	<ACTL6A>	57.8973	80.6056	63.4072	76.2082	108.816	78.5841	69.4913	81.7325	93.5327	85.4245	63.0035	75.1057	67.4575	96.2478	93.6566	82.1626	79.339	70.1188	73.617	64.4121	59.1046	0.111906	0.244236
323	ENSG00000077080.5	<ACTL6B>	0	0	0.130968	0	0	2.37393	0	0	0	0.345848	1.00848	0	0	0.125932	0	0	0	0	0	0	0	0	0.227925
324	ENSG00000187003.5	<ACTL7A>	0	0	0	0	0	0	0	0	0	0	0	0	0	0	0	0	0	0	0	0	0	0	1
325	ENSG00000148156.6	<ACTL7B>	0	0	0	0	0	0	0	0	0	0	0	0	0	0	0	0	0	0	0	0	0	0	1
326	ENSG00000117148.6	<ACTL8>	0	0	0	0	0	0	0	0	0	0	0	0	0	0	0	0	0	0	0	0	0	0	1
327	ENSG00000181786.3	<ACTL9>	0	0	0	0	0	0	0	0	0	0	0	0	0	0	0	0	0	0	0	0	0	0	1
328	ENSG00000072110.9	<ACTN1>	122.472	88.3866	122.979	127.434	131.047	180.331	143.788	179.725	92.8116	100.175	190.868	198.227	370.971	132.912	88.8282	148.671	131.423	90.6671	310.14	58.8773	381.619	-0.246903	-0.526423
329	ENSG00000077522.8	<ACTN2>	1.79227	0.846157	4.54646	3.14439	1.55269	9.25135	2.55048	2.39489	3.36488	3.44119	3.14929	6.09441	2.68246	4.55153	1.42786	4.86225	3.12732	0.752424	7.64281	1.70874	4.03574	-0.12456	-0.111679
330	ENSG00000130402.7	<ACTN4>	428.036	417.008	380.855	361.743	334.87	500.166	278.353	289.26	365.201	351.883	391.821	704.82	577.07	255.012	345.261	380.667	541.67	475.55	257.29	80.7752	398.435	-0.108208	-0.162739
331	ENSG00000131966.9	<ACTR10>	89.139	74.3514	61.424	85.2268	88.3024	106.006	101.298	103.971	100.854	92.7738	66.5597	75.2466	71.8502	84.3203	80.881	141.73	110.025	102.831	77.9918	163.593	74.8164	0.168392	-0.147919
332	ENSG00000138107.7	<ACTR1A>	27.499	14.7893	19.3084	45.0926	32.1681	23.9313	24.3404	13.0549	14.8092	14.9061	25.6897	20.0798	17.9851	35.8186	26.5094	31.1375	16.3758	21.9457	18.905	8.46941	12.6936	0.104111	0.122591
333	ENSG00000115073.6	<ACTR1B>	92.3721	45.1038	35.773	54.4048	61.5961	54.8972	53.9297	51.9314	45.9066	44.7874	42.7631	40.7762	50.0485	59.3858	44.0759	21.8706	30.0222	48.1731	59.4382	9.19377	64.6063	0.2614	0.497214
334	ENSG00000138071.9	<ACTR2>	1.51113	0	0	0.760182	0.785478	0	0.443562	0.342128	0.351279	0.380433	0.424623	3.52278	0.378064	1.34927	0.375754	0.438556	0.189534	0.573276	1.10689	0	1.328	-0.116316	-0.386719
335	ENSG00000115091.7	<ACTR3>	70.0039	69.7895	75.0073	107.773	104.213	81.7086	49.8268	68.7496	70.3852	71.5214	81.9346	108.484	86.8828	73.3822	79.0774	118.22	105.457	70.1725	86.0036	52.1166	47.9115	-0.206249	-0.206593
336	ENSG00000133627.13	<ACTR3B>	9.61148	18.1004	9.59808	19.6783	18.1025	14.8371	17.225	16.4401	16.8429	11.2574	10.1556	17.1912	11.918	11.4238	20.8731	12.0317	4.37824	12.9166	14.4071	6.05489	6.36405	0.465059	0.579835
337	ENSG00000106526.6	<ACTR3C>	1.82741	0.993314	0.0561291	2.19416	2.11897	0.698215	1.75577	0.306114	0.184884	1.52173	1.4331	0.211367	0.162028	1.67309	3.38178	1.20126	1.3836	0.555361	1.68669	1.56015	0.0862338	-0.0999487	-0.0361359
338	ENSG00000101442.8	<ACTR5>	0	0	0	0	0	0	0	0	0	0	0	0	0	0	0	0	0	0	0	0	0	0	1
339	ENSG00000075089.5	<ACTR6>	42.6806	44.4968	54.0337	61.0737	46.7268	60.6749	39.0334	41.2894	67.3901	40.862	41.1885	41.6393	33.8638	46.5767	41.2953	63.7623	45.2039	51.0036	34.8231	46.0617	23.6625	0.129972	0.497392
340	ENSG00000113812.9	<ACTR8>	24.4065	26.1573	31.3201	24.2049	24.1306	29.0807	27.9259	22.1122	28.4721	29.2415	24.8051	22.2464	20.3075	27.3632	17.8859	21.7371	26.5158	30.5269	23.7893	26.0954	18.4885	0.181288	0.631662
341	ENSG00000123165.7	<ACTRT1>	0	0	0	0	0	0	0	0	0	0	0	0	0	0	0	0	0	0	0	0	0	0	1
342	ENSG00000169717.5	<ACTRT2>	0	0	0	0	0	0	0	0	0	0	0	0	0	0	0	0	0	0	0	0	0	0	1
343	ENSG00000184378.2	<ACTRT3>	0	0	0	0	0	0	0	0	0	0	0	0	0	0	0	0	0	0	0	0	0	0	1
344	ENSG00000115170.9	<ACVR1>	26.146	35.3914	51.6949	33.6381	33.9765	35.2424	43.4506	36.0494	40.4895	20.3705	39.8792	43.0484	41.7671	33.6238	47.5329	62.1987	44.6164	44.196	26.2842	34.8435	25.7322	-0.238894	-0.349142
345	ENSG00000135503.8	<ACVR1B>	3.11011	3.8261	2.6942	4.02551	7.41638	0.872769	1.75577	1.85469	3.75314	0.674404	2.47697	5.17849	4.0867	6.78232	2.53634	2.70761	4.28347	2.83055	7.13329	0.260026	3.91501	-0.375968	-0.297797
346	ENSG00000123612.11	<ACVR1C>	0.42171	0	0.243226	0.172769	0	3.14197	0	0	0.11093	0.207509	0.159234	0.0704556	0.666113	0.179902	0.225452	2.55507	0.151627	0.358297	2.24892	0	0	-0.0830929	-0.1285
347	ENSG00000121989.10	<ACVR2A>	17.009	9.06859	12.8349	9.07035	8.53066	7.43599	22.1226	13.523	9.83581	7.19365	12.1548	14.2673	19.9114	12.2334	9.13082	10.2012	10.4812	12.2896	16.2168	5.79486	13.6077	-0.355398	-0.119545
348	ENSG00000114739.9	<ACVR2B>	0.509567	0.202342	0.318065	0.587413	0.127869	0.122188	0.0924087	0.342128	0.166395	0.276679	0.159234	0.299436	0.558095	0.197893	0.0187877	0.0762707	0.0758137	0.322467	0.351394	0	0.534649	0.0835649	0.153659
349	ENSG00000139567.8	<ACVRL1>	12.1242	34.7844	24.4162	24.7405	29.0444	25.4674	33.6737	34.2128	53.8751	18.0187	40.2154	30.6306	82.5801	38.3012	26.2464	34.7604	49.9612	37.2629	34.5771	47.399	38.0636	-0.474444	-0.676836
350	ENSG00000243989.3	<ACY1>	32.7704	31.5837	15.66	17.2596	34.3236	30.5644	21.8454	28.7927	32.9093	36.4178	39.1361	22.4753	20.9556	28.1367	16.3641	23.3198	19.0861	29.2371	25.9328	36.3665	19.2991	0.40658	0.265338
351	ENSG00000132744.3	<ACY3>	0	0	0	0	0.164402	0	0.794715	0	0.0184884	0	0	0	0	0	0	0	0	0	0	0	0.672623	0	0.116425
352	ENSG00000119640.4	<ACYP1>	10.8415	12.1589	7.3155	6.59976	6.42996	1.4488	5.61845	11.6143	11.6846	10.1679	8.84632	14.7604	9.36159	15.1298	5.20419	5.85377	1.9522	8.84994	11.3324	6.16633	10.0721	-0.0167959	-0.0901695
353	ENSG00000170634.8	<ACYP2>	24.9863	27.776	37.6065	25.0169	21.0435	24.4899	40.0869	22.5804	34.7766	25.2642	27.512	30.3311	38.4185	31.1231	39.3038	38.9362	29.8896	30.9927	25.4585	36.8122	18.4195	-0.29659	-0.344396
354	ENSG00000196839.8	<ADA>	2.58298	5.13212	5.66904	2.95434	6.53956	6.00465	6.72735	6.93258	5.01035	3.90809	11.6771	8.10239	53.6131	10.0925	5.0351	5.03386	10.993	7.2376	5.0425	3.65893	19.782	-0.54388	-0.528821
355	ENSG00000164113.6	<ADAD1>	0	0.0735788	0.0561291	0.138215	0.0730678	0	0	0	0.11093	0.0691697	0	0.0880695	0.846144	0	0	0	0.0379069	0	0.0702787	0	0	0.170308	-0.161902
356	ENSG00000140955.6	<ADAD2>	0.579852	2.37292	0.318065	4.56109	0.23747	0.994956	2.60593	2.17881	4.01198	2.62845	0.212312	0.598873	4.60878	0.809561	0.751508	0.514827	2.14174	0.483701	0.281115	4.27185	2.05236	1.14927	0.241981
357	ENSG00000168803.10	<ADAL>	7.55564	6.41975	5.93098	5.90869	6.55783	22.4476	6.72735	8.13903	8.63407	7.38386	9.67787	11.0615	7.32725	8.25752	3.25027	9.03807	7.2023	8.84994	5.99126	4.90334	6.57101	-0.0509572	0.203027
358	ENSG00000137845.10	<ADAM10>	16.3764	15.2676	11.0387	14.4262	12.8599	16.0415	6.20986	12.2446	19.3758	12.2084	9.55402	15.6764	7.09321	15.9753	6.06842	9.68637	4.81417	8.3125	15.8654	1.0401	10.1238	0.492321	0.68632
359	ENSG00000073670.9	<ADAM11>	1.00156	1.98663	0.860647	0	1.02295	0	0.702306	1.26047	0	0.103755	1.94619	0.369892	0.774132	1.13339	0.169089	0.400421	0.985578	1.27196	2.16107	0	0.983065	-0.210775	-0.241112
360	ENSG00000148848.10	<ADAM12>	0.808278	0.294315	0.243226	0.0345537	2.19203	2.07719	0.277226	0.180067	0.184884	0.224801	1.61003	1.84946	1.24221	1.1154	0.319391	5.28174	0.113721	0.465786	4.72624	0.185733	1.44873	-1.19642	-0.525385
361	ENSG00000143537.9	<ADAM15>	214.932	314.678	108.198	205.37	251.243	187.261	286.301	292.465	352.61	303.689	225.139	209.306	413.908	434.914	276.235	138.336	219.784	178.898	271.083	397.208	450.589	-0.0123264	-0.304213
362	ENSG00000151694.8	<ADAM17>	2.09098	1.65552	0.860647	1.52036	3.25152	1.36152	0.73927	1.49456	0.979884	1.76383	1.89311	1.83185	1.80031	0.917502	0.845446	1.25847	0.379069	1.55859	1.24745	0.260026	3.48384	0.191054	0.144596
363	ENSG00000168619.11	<ADAM18>	0	0	0	0	0.200936	0	0	0	0.0924418	0	0	0	0.0360061	0	0	0	0	0	0	0	0	0	0.393366
364	ENSG00000135074.11	<ADAM19>	3.23311	1.85787	2.78775	2.72974	1.40655	0.48875	5.23033	5.94222	1.46058	5.81025	6.45781	3.43471	0.900153	11.064	1.95392	0.133474	2.10383	3.40382	4.40999	5.57198	5.77766	-0.27194	-0.278554
365	ENSG00000104755.10	<ADAM2>	0	0	0	0	0	0	0	0	0	0.172924	0	0	0	0	0	0	0	0	0	0	0	0	0.328507
366	ENSG00000134007.3	<ADAM20>	0	0	0	0	0	0	0	0	0	0	0	0	0	0	0	0	0	0	0	0	0	0	1
367	ENSG00000139985.5	<ADAM21>	0	0.257526	0.617421	0.760182	0.219203	0.104732	0.0369635	0	0	0.795451	0	0.669328	0	0.485737	0	0	0	0	0	0.538625	0	0.404833	0.300306
368	ENSG00000008277.10	<ADAM22>	2.63569	3.16389	2.65678	2.33238	3.16018	6.37121	2.1254	4.84381	2.95814	2.68032	5.30779	9.26491	5.38292	2.46466	1.80362	3.01269	4.05603	6.35978	4.14644	1.8759	6.17434	-0.485278	-0.472918
369	ENSG00000114948.8	<ADAM23>	13.6177	15.3228	3.29291	2.41876	2.52084	0	8.92668	1.44054	1.92279	8.95747	4.45854	18.019	3.74464	3.29221	11.5732	3.85167	7.12649	3.9771	3.46123	5.20052	18.5575	-0.541468	-0.216533
370	ENSG00000042980.8	<ADAM28>	26.7083	15.378	41.3672	18.1234	8.85947	20.2308	24.5253	27.1721	7.7836	8.31765	17.6926	19.8509	6.17505	29.8638	11.6859	10.8114	12.0165	27.4814	15.5492	14.9143	22.5243	0.29402	0.210637
371	ENSG00000168594.11	<ADAM29>	0	0.0367894	0.0374194	0	0	0	0	0	0	0.0864621	0	0.0704556	0.918156	0	0	0	0	0.107489	0	0	0	0	-0.298695
372	ENSG00000134249.6	<ADAM30>	0	0	0	0	0	0	0	0	0	0	0	0	0	0	0	0	0	0	0	0	0	0	1
373	ENSG00000197140.10	<ADAM32>	3.93596	2.4281	0.767098	1.62403	1.82669	3.36889	5.87719	3.07915	3.32791	0.691697	2.4062	3.55801	2.43041	4.17374	0.713932	2.05931	0.852904	4.65786	1.49342	1.96877	2.01787	0.346294	0.148088
374	ENSG00000149451.13	<ADAM33>	128.692	208.67	187.004	163.543	116.908	170.277	185.261	347.53	160.072	163.863	368.98	248.937	247.506	182.349	300.716	188.217	236.463	252.456	168.862	213.463	255.183	-0.565611	-0.688971
375	ENSG00000069206.11	<ADAM7>	0.0702851	0	0	0	0	0	0	0	0	0	0	0	0	0	0.0375754	0	0	0	0	0	0	0	0.177768
376	ENSG00000151651.11	<ADAM8>	13.3542	6.91641	22.2084	9.96875	7.81825	10.9096	7.8917	8.46316	5.0843	10.6867	10.6333	6.79896	5.23889	16.3711	7.40235	6.97877	3.14627	8.15126	12.1582	5.31196	9.67543	0.298074	0.327338
377	ENSG00000168615.7	<ADAM9>	69.5998	51.1925	112.427	51.8651	63.6786	68.3378	66.5897	58.7019	65.3564	38.2508	72.5575	62.9345	67.0254	53.5749	67.3539	86.0905	56.974	67.4495	79.8015	37.9266	69.8494	-0.0616037	-0.0424757
378	ENSG00000134028.10	<ADAMDEC1>	0.193284	0.294315	6.02453	0.138215	0.127869	0	0	0.306114	0.721046	0	0.460008	0.0880695	0.108018	0.269854	0.225452	0.0381353	0.0379069	0	0.298685	0.817224	0.137974	0.0614816	0.297052
379	ENSG00000154734.10	<ADAMTS1>	123.473	100.178	84.175	420.018	229.159	159.699	100.504	267.31	164.084	192.897	66.4005	125.675	283.17	113.446	48.0025	173.096	208.658	81.7813	196.218	60.8646	186.748	0.36405	0.346287
380	ENSG00000142303.9	<ADAMTS10>	75.9606	60.1323	76.4105	91.5155	75.7347	60.5352	66.6082	92.9687	53.9676	57.9296	119.372	132.985	187.25	91.7502	69.2326	65.7453	97.2879	110.768	92.3638	41.0469	122.159	-0.448258	-0.760517
381	ENSG00000151388.6	<ADAMTS12>	10.3495	3.60536	7.33421	1.48581	7.52598	5.42862	6.13594	4.98786	6.37849	5.15314	9.00555	10.0399	7.0572	3.3282	3.363	10.8686	3.67696	8.18709	3.8829	2.80456	10.5033	-0.266564	-0.191489
382	ENSG00000160323.14	<ADAMTS13>	11.1578	8.11207	6.47356	8.62115	8.76813	5.79518	7.33725	7.59883	7.93151	12.3641	14.9503	14.3906	5.41892	6.49448	5.27934	7.0169	5.5344	11.0535	9.5052	7.89364	16.4534	0.0218595	-0.224896
383	ENSG00000138316.6	<ADAMTS14>	3.21554	0	4.77098	0	2.92271	5.3588	10.3128	0	6.06419	0	7.27167	0	0	5.25315	0	2.44066	0	15.0485	0	0	18.1091	2.83557	-0.149684
384	ENSG00000166106.2	<ADAMTS15>	0	0	0	0	0	0	0	0	0	0	0	0	0	0	0	0	0	0	0	0	0	0	1
385	ENSG00000145536.11	<ADAMTS16>	4.30496	0.257526	0	0	0.0913347	0	1.64487	0.252094	0.203372	0.172924	0.353853	0.775011	0.108018	0.071961	0.770295	0.343218	0.0947671	0	3.67206	0.0742931	0.120727	0.14876	0.0656531
386	ENSG00000140470.9	<ADAMTS17>	1.44084	0.404684	4.45291	0.587413	0.803745	0	0.0924087	0.270101	0.22186	0	0.530779	0.334664	1.83631	1.70907	2.36725	0.81991	0.454882	1.2003	3.02198	1.52301	0.327688	-1.02181	-0.281456
387	ENSG00000140873.11	<ADAMTS18>	0.263569	0	0	0.32826	0	2.05973	0	0	0	0.293971	0.548472	0.686942	0.180031	0.305834	0.150302	0.419489	0	0.214978	0	0	0.724364	-0.515971	0.00272001
388	ENSG00000145808.4	<ADAMTS19>	0.368997	0.0735788	0.168387	0	0.822012	0.48875	0.406598	0	0	0.553357	0.159234	1.93753	0.288049	0.413776	0	0.514827	0.360115	0.537446	0	0.0928664	1.22452	-0.162124	-0.326739
389	ENSG00000087116.9	<ADAMTS2>	11.9836	21.6322	17.2878	16.6722	13.1157	7.03452	27.7781	26.6499	28.1578	12.6062	28.3436	20.5026	15.4466	15.9573	15.1053	25.8939	22.5356	15.8009	38.0032	21.285	24.3697	-0.31763	-0.37487
390	ENSG00000173157.12	<ADAMTS20>	0	0	0	0	0	0	0	0	0	0	0	0	0	0	0	0	0	0	0.0175697	0	0	0	-0.0948388
391	ENSG00000156140.4	<ADAMTS3>	0	0.220737	0	0	0	0	0.295708	0.16206	0.203372	0	0.389238	0	0.126021	0.251863	0	0	0.113721	0.340382	0.175697	0.130013	0.862338	-0.333453	-0.459077
392	ENSG00000158859.9	<ADAMTS4>	39.3421	16.2609	16.8762	90.1161	106.35	30.5295	16.0421	33.9607	11.4813	72.4725	65.1266	20.7316	107.496	49.707	33.4797	64.1436	282.804	11.9313	300.266	5.25624	406.73	-0.981231	-0.551355
393	ENSG00000154736.5	<ADAMTS5>	0	0	0	0	0	0	0	0	0	0	0	0	0	0	0	0	0	0	0	0	0	0	1
394	ENSG00000049192.10	<ADAMTS6>	5.71066	2.26255	4.49033	7.30811	3.72646	5.76027	2.27325	2.55695	3.30942	2.21343	2.61851	4.54439	3.13253	2.5906	1.18362	4.99573	4.24557	1.95272	4.30457	0.984383	8.39917	0.145479	0.152098
395	ENSG00000136378.10	<ADAMTS7>	8.87349	9.76759	3.33033	9.88237	7.98265	4.10201	4.60195	8.8593	7.19198	12.5197	7.34244	9.35298	5.47293	4.91134	7.12053	2.536	2.67243	11.1789	9.82145	2.04306	7.05392	0.239976	0.327063
396	ENSG00000134917.9	<ADAMTS8>	7.22179	6.76925	5.51937	5.304	14.5588	1.55353	5.47059	3.52932	2.53291	4.3404	4.35239	9.01832	1.33223	3.56207	10.7466	7.34105	3.37371	7.9542	7.60767	7.48503	9.12353	-0.439693	-0.184444
397	ENSG00000163638.9	<ADAMTS9>	165.715	85.609	15.5291	196.49	213.157	192.672	106.917	45.683	73.0475	176.901	150.352	96.9997	51.7048	86.4431	82.9101	120.145	179.262	76.6219	289.46	36.0507	110.465	0.488764	0.108095
398	ENSG00000178031.11	<ADAMTSL1>	27.3585	13.281	30.2162	15.1518	10.467	17.1761	25.8929	17.4485	21.2801	24.365	35.1376	30.7186	2.89849	16.659	19.464	22.4617	25.644	43.0852	28.3575	8.71087	33.062	-0.3963	-0.291439
399	ENSG00000197859.5	<ADAMTSL2>	22.7196	36.0536	32.5175	15.0827	10.2295	13.3185	53.7264	44.1705	26.9006	32.1639	88.1801	64.6782	16.5448	32.5084	92.3979	29.1545	46.3411	107.489	35.4029	17.9975	63.0541	-0.641264	-0.735349
400	ENSG00000156218.8	<ADAMTSL3>	3.97111	0.754183	1.88968	1.00206	1.38829	10.1067	1.29372	2.05277	1.36814	3.51036	1.85773	3.54039	1.35023	2.19481	1.08969	2.38346	1.78162	2.68723	4.70867	0.241453	4.94982	-0.333257	0.0949535
401	ENSG00000143382.9	<ADAMTSL4>	108.608	169.746	61.5363	162.627	209.102	102.533	105.346	255.083	187.065	112.47	231.667	127.084	76.477	124.546	112.613	136.067	99.2022	198.515	173.536	183.225	161.119	0.0155677	-0.00303714
402	ENSG00000185761.6	<ADAMTSL5>	18.2917	30.664	26.9794	10.5043	12.4946	22.3952	42.7113	41.9917	32.2067	27.8754	28.6621	29.7323	15.9687	61.2928	27.0355	25.9702	35.4429	75.9769	16.3398	39.0782	53.7236	-0.114408	-0.482328
403	ENSG00000105963.9	<ADAP1>	17.3604	17.6589	8.75615	41.6545	9.68148	13.9643	20.3669	25.2094	29.1562	63.688	23.425	38.7153	4.50077	19.8972	11.8175	13.3855	11.8838	16.2309	25.7396	32.1503	30.9234	-0.0639437	0.200287
404	ENSG00000184060.6	<ADAP2>	4.30496	5.95989	7.97034	4.68203	11.2342	9.79247	8.83427	3.7454	2.03372	2.02321	6.63474	4.29779	1.22421	8.58135	6.27509	5.16734	5.89452	6.12688	4.35728	1.07725	0.517403	0.0385855	0.360268
405	ENSG00000160710.11	<ADAR>	204.776	155.674	144.626	219.278	184.66	180.209	93.8318	145.8	120.452	155.822	164.258	198.79	133.241	158.89	112.613	121.709	141.487	168.346	174.239	22.1579	136.491	0.138077	0.354708
406	ENSG00000197381.11	<ADARB1>	35.4061	35.7593	21.3291	39.4258	42.7812	41.3169	37.8136	40.7492	30.7831	17.3443	29.0159	34.0653	69.2398	46.5588	26.8664	52.4552	39.5937	29.3983	45.4176	18.759	32.9068	0.109329	-0.259209
407	ENSG00000185736.11	<ADARB2>	7.57322	27.8864	17.7368	34.5019	5.40701	21.697	20.3299	32.5381	46.3688	46.6031	5.94473	2.09605	1.87232	15.2018	6.04964	15.4639	24.6774	5.17739	6.28994	76.2619	13.9354	1.89719	0.403702
408	ENSG00000065457.6	<ADAT1>	41.9426	51.8363	34.2762	27.954	39.5114	60.64	30.7721	47.2316	54.5962	30.5903	25.8489	51.7496	45.1877	34.0375	25.9458	38.5548	29.7	30.3478	43.6079	28.1014	35.1661	0.255424	0.468208
409	ENSG00000189007.11	<ADAT2>	17.0441	13.5017	6.38001	9.81326	15.399	22.692	7.42966	13.343	16.0109	16.0301	15.2864	17.0326	9.43361	21.6962	6.38781	6.10165	9.23032	14.0453	15.9708	3.56607	18.385	0.0396334	0.170811
410	ENSG00000213638.4	<ADAT3>	0.562281	3.16389	0	0.691075	0.456674	0	1.77425	5.0959	1.59	0.397726	1.62772	7.6092	0.162028	0.359805	0	2.87922	0.151627	0.322467	0	6.24062	0.155221	0.454044	-0.126146
411	ENSG00000142920.12	<ADC>	25.1621	8.97662	13.7704	13.3723	16.3672	9.72264	14.2679	10.9661	10.8157	11.4649	21.4789	28.5345	7.36325	10.8301	18.9944	6.69275	10.7845	32.82	15.1099	7.16928	19.7648	-0.273016	-0.282471
412	ENSG00000063761.11	<ADCK1>	4.05896	8.86625	5.25743	13.2341	4.27446	2.21683	12.1795	4.69975	9.48453	9.49354	12.0133	11.4138	11.2159	13.4567	3.34421	5.96818	3.14627	6.59267	11.1919	9.67668	15.1599	-0.628698	-0.363035
413	ENSG00000133597.5	<ADCK2>	0.685279	2.18897	0	0.55286	3.12365	0	0.646861	3.16918	0	0.587942	0	0	2.3404	2.51863	0	1.56355	2.46395	2.07812	3.4788	5.51626	1.37974	-1.20617	-0.404715
414	ENSG00000163050.12	<ADCK3>	31.0133	36.2192	28.5697	36.0741	23.8384	43.5512	43.7278	46.0612	35.8305	37.3343	35.0491	34.5056	93.2919	39.7944	29.5155	37.3154	21.7775	31.5122	41.3239	55.144	40.5126	-0.0452939	-0.274858
415	ENSG00000123815.7	<ADCK4>	146.544	94.6224	62.453	102.884	84.7403	73.8886	70.8775	95.5616	94.3092	107.939	91.7363	83.0319	58.0779	86.605	104.629	76.1563	90.2941	115.318	102.923	35.1221	69.125	0.124652	0.315603
416	ENSG00000173137.7	<ADCK5>	7.25693	15.2124	10.2716	20.6459	9.97375	14.1912	12.1979	15.7559	15.7521	14.6467	16.2949	9.86378	14.9065	9.71473	12.6817	11.4787	14.6889	17.037	13.2475	13.2056	7.60582	0.122381	0.166703
417	ENSG00000164742.10	<ADCY1>	1.42327	0.386289	2.24517	0.950227	0.840279	0	1.18283	0.270101	0.610116	1.00296	2.05235	0.387506	0.522089	0.71961	1.18362	0.362286	1.25093	0.859913	0.245975	2.39595	1.25901	0.0370124	-0.136187
418	ENSG00000143199.13	<ADCY10>	0	0.0735788	0.411614	0.172769	0.876813	0	0.0369635	0.216081	0.0924418	0.121047	1.09694	0.827853	0.324055	0.431766	0.0375754	0.190677	0	0.214978	0.474381	0.185733	0	-0.236811	-0.323816
419	ENSG00000078295.11	<ADCY2>	4.67396	4.56189	4.02259	6.39244	1.91803	8.25639	2.29174	7.56282	7.4693	2.88783	4.42316	2.71254	5.23889	6.89026	4.8848	8.99994	5.07952	8.27667	3.72477	9.9367	6.82971	-0.165214	-0.334586
420	ENSG00000138031.10	<ADCY3>	424.1	277.08	228.184	484.495	586.752	258.601	440.364	478.781	487.021	291.567	320.431	248.145	256.58	310.224	387.571	282.087	400.846	275.817	780.146	359.634	239.609	0.477842	0.228616
421	ENSG00000129467.9	<ADCY4>	115.039	103.176	81.7427	169.071	140.455	150.972	77.7896	110.705	129.012	127.393	126.449	100.804	377.11	123.719	57.1334	66.4318	134.114	91.5987	148.358	34.082	253.838	-0.029364	-0.166204
422	ENSG00000173175.10	<ADCY5>	23.3346	19.388	16.5581	17.0695	16.0566	16.6699	21.1801	27.4422	21.2616	12.7445	20.205	17.79	69.4198	31.5369	10.1454	33.5782	13.3053	25.9765	36.2814	8.19081	26.698	-0.499458	-0.425542
423	ENSG00000174233.7	<ADCY6>	128.657	93.4451	64.7543	150.291	109.127	114.455	93.3697	87.7467	73.066	95.091	118.204	135.574	156.447	104.379	91.0451	84.813	87.9818	122.896	140.013	29.5687	92.5461	-0.146258	-0.110727
424	ENSG00000121281.8	<ADCY7>	10.5779	14.9365	17.0258	10.3488	10.5766	12.5679	8.22437	16.3861	9.35511	8.04097	23.7081	16.2752	7.38126	22.6677	6.29388	12.4893	11.808	28.0547	11.104	3.2689	14.1078	-0.229729	-0.294022
425	ENSG00000155897.5	<ADCY8>	0.14057	0	1.06645	0.155492	0.310538	0	0.0369635	0.0900336	0.443721	0.0345848	0.0707705	0.739784	0	0.143922	0	0	0.0189534	0.250808	0.052709	0.0371465	0	0.195979	0.276485
426	ENSG00000162104.5	<ADCY9>	2.65326	3.32944	4.50904	3.78363	7.63558	4.5384	3.99206	5.07789	7.22895	3.95996	4.12238	3.31141	4.37474	3.40016	2.81815	2.51693	5.36382	4.31748	3.60178	1.0401	4.82909	0.211843	0.529893
427	ENSG00000141433.8	<ADCYAP1>	6.30808	1.36121	5.76259	1.83135	2.74004	0.663304	0.517489	0.468175	0.0184884	0.0864621	22.9827	2.44833	1.44025	4.65947	1.78483	0.305083	0.928718	4.67578	1.59884	3.1946	2.62151	-0.963196	-0.334101
428	ENSG00000078549.10	<ADCYAP1R1>	0	0	0.187097	0	0	0.296741	0.184817	0.450168	0	0.121047	0.230004	0	2.52043	0.575688	0.0751508	0.133474	0.492789	0.501616	0.755496	0	0	-0.38113	-0.477237
429	ENSG00000087274.12	<ADD1>	770.465	733.783	744.142	828.477	615.651	453.054	722.377	726.877	784.609	730.933	673.346	751.955	604.327	697.716	593.428	529.433	531.473	678.024	613.375	776.864	662.81	0.143851	0.483796
430	ENSG00000075340.18	<ADD2>	2.86412	2.99834	0.187097	2.26327	3.19671	3.14197	0.73927	3.33124	0.887442	1.05484	2.08773	2.18412	1.7823	2.91442	1.27756	0.915248	1.06139	0.806169	1.7394	0.538625	1.56945	0.566021	0.379696
431	ENSG00000148700.9	<ADD3>	300.521	152.823	187.097	193.207	236.922	350.434	47.1469	183.578	132.894	157.084	129.545	331.071	107.262	227.685	78.7768	85.1181	61.7313	132.695	133.002	12.537	288.797	0.515028	0.381776
432	ENSG00000118492.12	<ADGB>	0	0	0.112258	0	0	0	0	0	0	0	0.283082	0.40512	0	0.305834	0	0	0.0189534	0.197063	0	0.0371465	0.120727	-0.103388	-0.726061
433	ENSG00000187758.3	<ADH1A>	0.878563	1.45318	1.14129	1.50309	0.840279	0	0	1.42253	1.7564	0.778159	0	0.40512	4.24872	0	0.112726	0.32415	0.360115	0	0.158127	0	0.810597	1.19804	0.285572
434	ENSG00000196616.8	<ADH1B>	708.21	1374.42	1312.3	1304.75	1053.25	1427.66	777.213	2746.78	1654.01	488.372	533.114	448.256	3610.8	1277.09	622.417	2551.2	1806.24	551.652	1822.38	979.926	295.592	0.417011	-0.0273748
435	ENSG00000198099.4	<ADH4>	1.33542	0	1.9271	1.15755	2.06416	0.645849	0.757751	7.90495	0.573139	0.760866	0.283082	0.669328	1.92633	3.93986	2.40482	1.27753	1.21302	0	3.1274	2.08021	1.24177	-0.284691	0.0243813
436	ENSG00000197894.6	<ADH5>	99.4007	135.827	147.994	121.301	92.3759	167.746	133.05	205.241	114.535	91.4769	107.695	105.243	190.832	120.049	110.772	213.081	130.21	83.2145	78.3081	83.5797	124.987	0.198388	0.148832
437	ENSG00000172955.13	<ADH6>	2.5654	1.94984	1.10387	1.52036	1.97283	10.9794	0.0924087	2.19682	1.1093	2.43823	1.62772	2.34265	1.71029	1.99692	1.12726	0.705504	1.61104	2.40059	1.03661	0.167159	4.84634	0.210131	0.248581
438	ENSG00000196344.7	<ADH7>	0.0351425	0.3495	0.168387	0	0.164402	0	0	0.10804	0	0	0	0	0	0	0.0939385	0	0	0	0	0.222879	0.120727	0.0498294	0.31398
439	ENSG00000147576.11	<ADHFE1>	98.8911	143.534	134.841	70.6624	68.1722	238.475	93.3882	151.815	154.877	103.685	78.4491	89.778	235.174	307.777	69.6272	111.565	73.4256	73.7017	79.8718	88.8174	93.4429	0.423171	0.0803865
440	ENSG00000182551.9	<ADI1>	31.6283	43.0252	21.6284	47.0103	20.1484	24.2979	53.9482	30.4854	33.8152	36.2103	45.9478	18.565	24.1061	62.9299	21.0234	53.1988	6.3873	40.9892	27.1452	82.6511	79.0764	-0.320608	-0.281516
441	ENSG00000182035.7	<ADIG>	0	0	0	0.207322	0.219203	0	0	0	0.295814	0	0	0	0.576098	0	0	0	0	0	0	0	0	0	0.0987447
442	ENSG00000181092.5	<ADIPOQ>	0	0	0	0	0.65761	0	0	1.00838	1.23872	0	0	0	2.14236	1.4752	0	30.2795	0	1.37944	7.0103	0	5.43273	-1.91031	-0.452511
443	ENSG00000159346.8	<ADIPOR1>	11.1578	12.2509	28.6446	6.06418	7.12411	76.8211	23.4533	19.5733	16.3622	21.4945	7.78476	8.12001	17.553	19.7173	4.20844	25.9511	7.25916	8.38415	15.5316	23.2166	27.6121	0.20409	0.328472
444	ENSG00000006831.9	<ADIPOR2>	6.76494	6.21741	7.09098	17.2769	6.19249	21.5574	2.23629	8.78728	9.24418	6.45007	1.29156	9.61719	13.2142	10.4883	1.10847	5.56776	2.80511	3.69046	5.25333	0	15.3669	0.368568	0.38044
445	ENSG00000148671.9	<ADIRF>	1168.56	1159.75	118.302	156.908	755.904	277.226	95.643	941.679	1517.58	115.133	881.5	824.524	1396.21	95.4023	802.046	120.87	1211.33	756.33	860.493	89.1703	1027.39	-0.67409	-0.146068
446	ENSG00000156110.9	<ADK>	31.6107	32.5035	31.9936	18.0889	35.7119	26.8813	31.0678	27.2802	28.657	27.3393	27.8128	44.2637	22.6839	25.816	30.53	28.3536	36.6559	33.7874	29.64	39.1896	29.9749	-0.00533427	-0.327563
447	ENSG00000148926.5	<ADM>	59.8653	71.0956	38.0181	66.1013	76.0635	156.348	53.671	81.3903	40.1383	50.8743	81.3861	107.727	219.997	194.259	60.1958	103.232	229.299	57.238	441.631	19.1119	111.949	-0.769606	-0.633293
448	ENSG00000128165.7	<ADM2>	0	0	0.860647	0	0	0	0	0.252094	0.0369767	0	0	0	0	0	0	0.0381353	0	0	0.650078	0	0	0	0.158456
449	ENSG00000224420.3	<ADM5>	0	0	0	0	0	0	0	0	0	0	0	0	0	0	0	0	0	0	0	0	0	0	1
450	ENSG00000101126.11	<ADNP>	51.1148	40.4684	57.7943	57.2382	45.5029	78.0604	50.1225	50.851	55.2063	49.4217	45.3639	60.5566	42.7213	57.8746	26.3967	61.3025	27.7478	54.5149	55.0809	29.8844	47.877	0.089772	0.439019
451	ENSG00000101544.4	<ADNP2>	0.527138	0	0.561291	0.120938	0	1.955	0	0	0	0.484188	0	0	0.288049	0	0	0	0	0	0.491951	0	2.27657	0.164707	0.0961154
452	ENSG00000181915.3	<ADO>	0	0	0	0	0	0	0	0	0	0	0	0	0	0	0	0	0	0	0	0	0	0	1
453	ENSG00000163485.11	<ADORA1>	0.386568	0	1.01032	1.60675	1.11428	0	2.10692	0.180067	1.36814	0.121047	0.548472	0.31705	1.22421	0	0.73272	2.13558	0.568603	3.38591	12.615	0.390039	1.0693	-0.0406798	-0.351105
454	ENSG00000128271.15	<ADORA2A>	2.54783	2.02342	4.24711	3.7318	0.127869	1.76299	3.19734	0.594222	2.40349	1.26235	1.94619	4.33302	2.14236	3.70599	1.91634	1.56355	1.62999	5.64318	1.52856	0.222879	4.44966	0.149594	-0.215313
455	ENSG00000170425.3	<ADORA2B>	1.54627	1.50837	3.21807	4.54381	0	3.70054	2.55048	1.3505	0.314302	2.42094	2.60082	0	3.96067	3.04035	0.131514	1.81143	0.492789	0.519531	0.263545	0.315746	0.845091	1.28453	0.424431
456	ENSG00000121933.13	<ADORA3>	7.01094	8.81107	64.3614	22.6327	8.11052	3.28161	3.56698	5.14992	5.76837	2.40365	6.86474	2.73015	6.76915	16.1013	4.28359	8.21816	9.66625	7.7213	5.37632	7.31787	2.62151	-0.0962036	0.313877
457	ENSG00000159322.13	<ADPGK>	74.0629	58.3112	93.6608	60.9355	75.3329	84.8331	60.7125	62.3933	63.2672	54.5576	62.8796	69.6806	81.9319	103.516	56.4758	63.7623	63.3613	63.3828	90.8704	58.4687	71.781	-0.0210777	-0.136404
458	ENSG00000144843.7	<ADPRH>	2.58298	2.35452	4.84582	3.17894	2.63044	1.57098	1.73728	1.74665	2.71779	2.87054	1.80465	5.09042	6.01302	3.27422	2.1418	0.858045	5.98928	1.95272	2.33677	0.445759	1.89714	0.233867	-0.122545
459	ENSG00000153531.8	<ADPRHL1>	1.19485	0.367894	0.112258	0.397368	0.383606	0	0.665343	0.0180067	0.665581	0	1.38003	3.22334	0.288049	0.215883	0.150302	1.04872	0.72023	1.82732	0.158127	0	0.534649	-0.240551	-0.46553
460	ENSG00000116863.10	<ADPRHL2>	0	0	0	0	0	0	0	0	0	0	0	0	0	0	0	0	0	0	0	0	0	0	1
461	ENSG00000170222.11	<ADPRM>	15.4276	12.7107	20.431	19.9202	18.7967	31.2451	16.0791	17.0163	15.8815	16.2376	16.7372	18.794	16.8329	21.0666	19.464	15.2351	15.4281	19.4018	17.148	23.6809	15.7463	-0.0432359	0.041335
462	ENSG00000120907.13	<ADRA1A>	0.0878563	0.496657	0.0561291	0.725628	0.274004	0.593483	0.295708	0.720269	0.129419	0	0.353853	1.16252	3.31256	0.629659	0	0.286015	0.492789	0	1.68669	0.0742931	0.465662	-0.299091	-0.41986
463	ENSG00000170214.3	<ADRA1B>	0	0	0	0	0	0	0	0	0	0	0	0	0	0	0	0	0	0	0	0	0	0	1
464	ENSG00000171873.6	<ADRA1D>	0	0	0	0	0	0	0	0	0	0	0	0	0	0	0	0	0	0	0	0	0	0	1
465	ENSG00000150594.5	<ADRA2A>	0	0	0	0	0	0	0	0	0	0	0	0	0	0	0	0	0	0	0	0	0	0	1
466	ENSG00000222040.3	<ADRA2B>	0	0	0	0	0	0	0	0	0	0	0	0	0	0	0	0	0	0	0	0	0	0	1
467	ENSG00000184160.6	<ADRA2C>	0.527138	0.607025	0.804518	1.17483	0	0	1.20131	0.972363	0.517674	0.691697	0	3.39948	3.18654	0	0.338178	0.438556	2.84301	0	2.51246	0.204306	1.5867	0.292317	-0.454471
468	ENSG00000043591.4	<ADRB1>	0	0	0	0	0	0	0	0	0	0	0	0	0	0	0	0	0	0	0	0	0	0	1
469	ENSG00000169252.4	<ADRB2>	0	0	0	0	0	0	0	0	0	0	0	0	0	0	0	0	0	0	0	0	0	0	1
470	ENSG00000188778.3	<ADRB3>	0	0	0	0	0	0	0	0	0	0	0	0	0	0	0	0	0	0	0	0	0	0	1
471	ENSG00000173020.6	<ADRBK1>	57.0188	49.4082	46.7182	61.0046	56.116	70.4499	49.568	49.4284	40.2862	46.5166	68.1874	52.0491	79.5555	86.0293	40.9572	29.574	37.5278	61.9496	60.0532	9.24949	58.3803	-0.235907	-0.0163895
472	ENSG00000100077.10	<ADRBK2>	0	0	0.467743	0	1.47962	0	0	0	0	0	0	0	0.288049	0.593678	0.356966	1.50635	0	0	0.773066	0	0.603636	-0.656357	-0.26628
473	ENSG00000130706.8	<ADRM1>	36.0914	55.9567	37.4569	30.4764	42.7629	26.3227	45.1694	34.843	39.2323	50.5976	31.9529	36.0556	32.7476	34.1635	41.4644	42.3112	43.1759	31.4764	43.6079	25.5754	25.7322	0.164297	0.411431
474	ENSG00000239900.7	<ADSL>	40.2031	60.6658	30.1414	48.0124	51.6224	70.7466	63.4663	51.3912	41.34	53.9178	47.2393	36.5312	38.9586	44.6158	36.0348	43.951	49.7906	44.0885	57.6461	46.4146	56.2244	0.205066	0.39834
475	ENSG00000035687.9	<ADSS>	13.5826	6.56691	13.1342	14.8408	9.66321	23.9139	7.33725	9.50755	10.3535	15.6323	9.78403	9.77571	11.756	18.2601	5.71146	8.8474	6.3873	10.9102	13.4408	4.51331	9.39948	0.252819	0.403732
476	ENSG00000185100.6	<ADSSL1>	6.13237	11.092	15.5291	14.7026	10.9419	53.6578	9.6105	15.2337	13.3856	27.322	13.4641	17.2616	33.2877	20.4369	6.04964	4.84319	10.7845	8.93952	16.1465	17.9789	18.5403	-0.194788	0.157874
477	ENSG00000111863.8	<ADTRP>	0.263569	0.680604	0.935486	0.155492	0.493207	2.53103	0.166336	0.900336	0.776512	0.293971	2.47697	0.810239	0.720123	1.54716	0.169089	0.591098	0.303255	0.447872	1.9678	0.260026	0.327688	-0.00555329	-0.147182
478	ENSG00000106624.4	<AEBP1>	247.685	207.088	244.667	442.236	249.344	200.894	271.996	397.732	176.213	200.99	430.763	210.521	417.491	255.965	222.615	273.411	359.016	195.935	523.822	340.411	380.67	-0.466779	-0.468703
479	ENSG00000139154.10	<AEBP2>	19.5744	18.1924	24.5471	23.1856	20.7512	28.0857	12.9742	18.817	17.9707	18.7969	19.9396	29.9965	30.7852	22.9196	19.8586	22.8431	20.4318	23.0564	15.0396	22.6037	13.1075	-0.230241	-0.234075
480	ENSG00000181026.13	<AEN>	2.12612	0.919736	2.32	2.78157	4.56674	5.28898	1.44158	1.42253	0.887442	1.43527	0.955402	2.50117	1.58427	2.15883	2.12301	1.14406	2.1986	0.931573	5.71015	0.148586	2.60426	-0.199755	0.150245
481	ENSG00000104964.10	<AES>	999.594	1155.83	797.502	951.817	723.736	648.362	1231.18	1008.93	942.167	1266.65	1073.61	1037.83	624.112	1046.4	1163.35	620.347	1190.73	1268.41	877.377	1069.97	1152.91	-0.132986	-0.129112
482	ENSG00000250232.1	<AF196779.12>	0	0	0	0	0	0	0	0	0	0	0	0	0	0	0	0	0	0	0	0	0	0	1
483	ENSG00000196526.6	<AFAP1>	5.49981	3.45821	2.76904	0.742905	0	0	0	0.648242	3.18	2.47282	3.37929	5.40747	2.01634	2.71653	0.469692	5.37708	0	2.47225	4.65596	12.7784	3.38036	-0.880014	-0.509835
484	ENSG00000157510.9	<AFAP1L1>	5.8688	17.2726	12.0303	8.91486	3.43418	8.65787	14.6191	22.6524	19.949	14.1452	15.7641	11.907	35.5921	32.1845	5.16661	38.7836	8.0173	34.4861	7.90636	80.0137	25.8356	-0.954707	-0.628865
485	ENSG00000169129.10	<AFAP1L2>	188.048	185.584	59.104	233.946	156.73	149.383	125.787	151.04	170.518	252.711	151.874	212.195	42.1272	196.148	103.802	54.9339	80.7605	153.996	157.53	51.5037	127.971	0.353347	0.575056
486	ENSG00000172493.16	<AFF1>	58.7935	49.7761	77.6827	45.7319	53.9057	73.522	48.0895	84.1094	71.6055	38.5794	35.9337	45.7609	77.3592	68.8846	25.5888	76.0419	43.3086	43.9452	66.1498	57.8	66.2965	-0.0363463	0.21551
487	ENSG00000155966.9	<AFF2>	0.509567	2.59365	3.06839	1.22666	3.59859	3.66563	0.646861	2.89908	6.02721	2.0578	0.619242	1.07445	0.864147	2.30275	0.601206	2.09744	2.57767	2.02438	0.913623	1.46729	1.53496	0.722618	0.650904
488	ENSG00000144218.14	<AFF3>	16.9914	7.83615	11.2445	8.98397	14.7049	12.1839	9.44417	11.3622	8.00546	5.7065	9.94326	9.14161	4.26673	13.8165	6.23751	9.28595	4.41615	13.9557	6.51835	11.3668	24.3697	0.14816	0.0518617
489	ENSG00000072364.8	<AFF4>	4.7091	1.48997	1.94581	1.20938	3.87259	1.85027	0	1.8727	2.10767	1.57361	1.07925	3.25857	4.55478	3.1303	1.9915	2.74574	0.814997	1.8094	3.40852	0.0742931	2.88021	-0.458855	-0.147507
490	ENSG00000141385.5	<AFG3L2>	6.34323	7.06357	3.79807	5.40766	4.93207	14.1912	4.71284	5.47404	5.3986	6.27715	6.12165	8.52513	4.6808	7.87973	3.43815	6.10165	2.91883	4.78327	7.25628	2.13593	7.76104	-0.152158	0.209898
491	ENSG00000079557.3	<AFM>	0	0	0	0	0	0	0	0	0	0	0	0	0	0	0	0	0	0	0	0	0	0	1
492	ENSG00000183077.11	<AFMID>	49.9727	39.1439	47.953	58.6549	50.3437	71.0085	41.6578	56.0189	54.5222	67.4923	80.3069	79.0864	60.2563	65.3406	73.9483	52.4742	62.8117	102.634	72.4046	62.7591	58.1388	-0.314811	-0.945808
493	ENSG00000081051.3	<AFP>	0	0	0	0	0.456674	0	0	0	0	0.380433	0.424623	0	0.378064	0	0.356966	0	0	0	0	0	0.707117	0	-0.275081
494	ENSG00000119844.10	<AFTPH>	25.1796	24.888	31.133	32.8951	28.7704	30.7215	24.3035	21.572	29.0822	20.6299	19.0019	31.6522	28.3188	33.4978	23.0337	34.8938	29.6053	28.825	26.6005	18.3132	19.9717	-0.0688903	0.0301957
495	ENSG00000038002.4	<AGA>	10.5428	6.73246	11.4129	10.7808	10.4122	2.09464	9.66595	3.2052	13.552	7.03801	3.06083	18.1952	4.55478	12.1434	16.1762	5.85377	3.84755	6.77182	7.22114	7.68934	8.33018	0.44886	0.0021683
496	ENSG00000157985.13	<AGAP1>	3.09254	9.19736	3.4613	2.67791	6.24729	4.8875	8.76034	4.75377	9.72488	3.07805	2.81313	7.16886	4.55478	2.28476	3.19391	3.87074	3.07046	3.02761	3.53151	9.69525	7.84727	0.400281	0.257854
497	ENSG00000204172.7	<AGAP10>	10.2792	16.7576	15.8097	9.50227	0.274004	28.9061	8.03956	0.324121	28.8603	20.6471	19.055	20.0094	16.4008	22.164	5.20419	9.32409	13.1537	36.1343	23.6839	5.05193	26.1806	-0.529833	-0.281367
498	ENSG00000135439.7	<AGAP2>	4.4631	2.7776	2.05807	2.19416	0.493207	9.84483	2.38414	1.76466	3.08756	3.1991	1.52157	2.30742	8.35342	3.14829	0.995748	0.32415	2.14174	1.59442	2.02051	0.445759	5.50171	0.289622	0.186179
499	ENSG00000133612.14	<AGAP3>	205.988	194.23	151.661	282.477	214.764	174.379	175.151	199.893	204.611	251.501	227.05	237.858	195.531	210.828	195.711	125.713	177.12	227.393	194.163	155.31	141.751	0.0486298	0.295337
500	ENSG00000188234.9	<AGAP4>	27.3233	2.13379	18.8407	45.2136	45.9048	67.4999	21.9378	27.4062	29.5999	27.3393	24.6458	7.64443	29.9211	16.3711	23.3531	13.7287	3.96127	14.5648	16.6736	23.9224	24.9733	0.698662	0.673746
501	ENSG00000172650.8	<AGAP5>	8.32878	6.54852	2.54452	5.85686	4.98687	19.5849	4.67588	5.04188	2.8657	8.69809	5.82088	9.58196	6.75115	10.9021	1.84119	3.27964	4.54882	7.2376	11.2973	0.612918	7.74379	-0.285473	0.0971017
502	ENSG00000204149.5	<AGAP6>	46.0894	34.858	25.0897	35.504	47.0556	51.9472	41.6394	39.5788	35.8674	37.7493	29.2459	40.4415	34.4399	52.9093	35.2081	24.8833	25.3028	27.4635	63.409	23.5138	32.7171	0.237604	0.280849
503	ENSG00000204169.6	<AGAP7>	0	0	0	0	0	0	0	0	0	0	0	0	0	0	0	0	0	0	0	0	0	0	1
504	ENSG00000174194.11	<AGAP8>	32.7001	19.2777	15.66	11.1436	12.9878	15.3433	12.8818	11.5423	14.273	25.5928	14.2603	30.5249	10.7838	17.7564	8.13507	13.9575	15.1627	15.8367	17.0426	1.37442	21.041	-0.033037	0.20363
505	ENSG00000198035.9	<AGAP9>	12.0715	11.5703	12.5355	12.9922	0.803745	27.1606	6.76432	2.66499	15.068	22.8087	21.8681	22.264	18.5072	24.7726	5.74903	8.8474	13.021	23.8626	19.0455	2.56311	19.8165	-0.610302	-0.353296
506	ENSG00000166748.8	<AGBL1>	0.298712	0	0.0561291	0	0.0365339	0.785492	0.0924087	0.0900336	0.0739535	0	0.176926	0.475575	0	0	0	0.209744	0.303255	0.501616	0.263545	0.11144	0.310442	-0.328943	-0.230249
507	ENSG00000165923.11	<AGBL2>	2.00312	3.99165	2.52581	1.123	2.72177	10.1416	0.998014	3.87144	5.84232	3.38931	4.22854	2.81822	1.00817	3.16628	1.93513	5.05293	2.88092	3.78004	1.19474	1.95019	4.5359	0.0726541	0.232944
508	ENSG00000146856.10	<AGBL3>	12.0539	6.6221	8.38195	12.4221	10.6314	10.8572	6.7828	9.57957	8.65256	14.4046	9.64249	10.9382	9.05554	10.5963	7.81568	6.86436	6.76637	10.7489	8.66185	3.51035	9.46847	0.150398	0.443944
509	ENSG00000186094.12	<AGBL4>	0.228426	0.0367894	0.392904	0.27643	0.109602	0.907679	0.240263	0.666248	0.22186	0.190217	0.424623	0.72217	0.0720123	1.04343	0.375754	0.32415	0.322208	0.340382	0.439242	0.167159	0.275948	-0.194589	-0.216175
510	ENSG00000084693.11	<AGBL5>	21.1382	20.2342	18.2794	18.8663	16.2758	21.6447	13.8243	19.1952	18.7842	25.7311	24.2212	23.3384	18.9752	19.1776	18.5435	18.9342	19.4083	21.1395	18.7996	14.6915	13.4352	0.00410668	0.0549266
511	ENSG00000204305.9	<AGER>	34.5451	36.1824	18.2981	43.4168	33.5564	47.4088	34.5793	30.8095	18.8766	48.1594	41.0115	34.3647	36.9603	27.7589	25.4949	18.4384	27.2361	42.6732	29.0251	22.2508	39.7193	0.247975	0.246438
512	ENSG00000173744.13	<AGFG1>	61.9036	69.0353	58.8233	76.8993	106.094	81.15	85.552	65.1483	73.3064	55.0072	57.9965	67.9016	75.2168	90.4729	75.3386	126.285	67.7964	54.8016	131.491	102.952	50.8262	-0.0792267	-0.272853
513	ENSG00000106351.8	<AGFG2>	35.9684	76.1357	44.4169	45.9219	42.2149	25.3452	60.3059	51.2111	86.8584	38.9598	38.5876	39.1205	61.2284	73.1483	50.3886	68.7389	68.0618	51.6485	42.4132	60.2331	31.8375	-0.1914	-0.105901
514	ENSG00000164252.8	<AGGF1>	0	0	0	0	0.913347	0	0	0	0	0	0	0	0	0	0	0.133474	0	0	0	0	0	0	0.274082
515	ENSG00000006530.11	<AGK>	3.60211	15.1021	2.73162	5.09667	3.05058	5.34134	5.95112	6.1763	3.93802	6.39819	9.04094	6.39384	2.12436	2.69854	5.59873	5.18641	8.20683	4.53246	2.79358	1.50444	10.3308	0.0082484	0.0931494
516	ENSG00000162688.11	<AGL>	10.4373	10.6689	11.0949	8.8112	12.7503	19.6024	7.78081	12.4606	13.8663	7.79888	11.4648	16.0639	18.9392	12.989	7.45871	17.1228	13.6275	13.9915	9.64575	9.97385	11.8658	-0.245038	-0.302686
517	ENSG00000116771.5	<AGMAT>	0	0	0	0	0	0	0	0	0	0	0	0	0	0	0	0	0	0	0	0	0	0	1
518	ENSG00000187546.9	<AGMO>	0	0	0	0.863843	0	0	0	1.3325	0.369767	0.259386	0	0	0	0	0	0.343218	0.341162	0	0	0	0	0	0.457268
519	ENSG00000092847.6	<AGO1>	0	0	0	0	0	0	0	0	0	0	0	2.34265	0	0	0	0	0	0	0	0	0	0	-0.299671
520	ENSG00000123908.7	<AGO2>	8.59235	10.8897	8.71873	12.6812	5.93676	11.0667	6.9861	3.56533	3.8086	12.9693	9.89018	18.0542	3.29456	0.683629	0.789083	8.71392	3.07046	7.34509	10.085	3.95611	11.8485	0.222854	0.230129
521	ENSG00000126070.14	<AGO3>	15.5681	10.393	8.86841	17.1041	19.4178	14.2087	9.99862	12.2446	13.6629	13.661	10.6687	19.798	10.0457	12.3593	6.23751	9.17155	10.2349	12.7733	19.1334	6.33349	13.5732	0.342565	0.30139
522	ENSG00000134698.10	<AGO4>	8.15307	0	3.87291	8.74209	1.73536	6.42358	0	5.51005	0	3.40661	3.09621	2.43072	4.86083	1.6551	1.31514	0.533895	4.13185	2.14978	2.60031	0.334319	2.67325	0.498293	0.397736
523	ENSG00000204310.6	<AGPAT1>	192.124	232.564	178.435	201.327	172.86	166.646	148.796	162.691	216.758	207.405	166.488	209.359	102.653	177.168	198.417	162.743	179.811	216.465	148.358	163.408	127.419	0.153849	0.453765
524	ENSG00000169692.8	<AGPAT2>	46.5111	76.5404	49.693	40.0823	113.292	46.3615	97.2509	74.6198	89.3913	55.4222	107.182	89.2672	186.656	136.06	73.1968	288.246	74.0889	92.6377	362.041	106.443	96.4094	-0.706818	-0.788273
525	ENSG00000160216.14	<AGPAT3>	66.8938	50.659	33.4156	48.6344	56.0612	50.254	49.5126	26.722	49.9186	41.8649	34.306	52.3837	16.7609	41.2336	38.8717	20.002	32.96	44.3393	41.6401	23.9781	37.7704	0.391907	0.796961
526	ENSG00000026652.9	<AGPAT4>	34.3343	25.1824	28.2704	28.9215	17.9747	37.6338	36.3905	36.8597	37.9566	43.6979	45.6116	29.5209	22.0898	32.0586	25.7579	19.5825	28.2596	33.662	30.1496	34.3048	40.047	0.226605	0.161496
527	ENSG00000155189.7	<AGPAT5>	1.58141	0.3495	1.70258	0	4.51193	0	0	0.792295	0.591628	1.05484	0.813861	2.783	0.270046	0.431766	2.19816	0.858045	2.00906	1.84523	0.333824	0	2.84571	-0.188193	-0.144208
528	ENSG00000158669.7	<AGPAT6>	132.118	134.723	131.436	203.107	156.694	114.245	150.423	134.6	150.958	110.844	141.86	144.998	116.732	149.913	153.383	130.499	133.773	154.516	132.019	46.3775	123.332	0.00951227	0.303945
529	ENSG00000138678.6	<AGPAT9>	3.49668	4.12042	0.299355	0.829289	1.40655	1.85027	3.06797	0.720269	1.07233	0	0.813861	3.78699	2.41241	0.845541	0	7.95122	1.36465	2.93804	1.1596	0	0.344935	0.0677883	-0.101933
530	ENSG00000018510.8	<AGPS>	1.49356	3.86289	1.36581	2.22872	0.986415	6.00465	2.31022	1.53057	2.51442	0.57065	2.14081	2.50117	0.270046	4.0478	0.770295	1.31567	3.12732	1.02115	0.966332	0	2.36281	0.390244	0.296711
531	ENSG00000106541.7	<AGR2>	0.105428	0.93813	0.617421	0.535583	1.66229	0.192009	1.16435	3.52932	4.97337	0.795451	0	1.42673	16.6168	0.899512	0.97696	0	0.132674	0	1.10689	0.705784	0.58639	0.18082	-0.115184
532	ENSG00000173467.4	<AGR3>	0	0	0.280646	0	0	0	0.332671	0.252094	0.314302	0	0	0.845467	0.270046	0	0.526055	0	0	0	0	0	0	0	-0.0928521
533	ENSG00000188157.9	<AGRN>	31.4701	25.3663	13.2652	33.9836	10.1199	48.0546	25.9853	19.3572	15.068	36.6253	31.4929	30.7715	22.1978	27.2552	23.5222	11.5359	14.5183	23.8805	17.0777	18.3875	15.7635	0.205683	0.326196
534	ENSG00000159723.4	<AGRP>	0	0	0	0	0	0	0	0	0	0	0	0	0	0	0	0	0	0	0	0	0	0	1
535	ENSG00000135744.7	<AGT>	0	0	0	0	0	0	0	0	0	0	0	0	0	0	0	0	0	0	0	0	0	0	1
536	ENSG00000135049.11	<AGTPBP1>	19.4162	14.6422	15.6787	14.8581	18.2669	32.5019	14.3788	13.6131	17.8598	15.8917	10.6156	13.6684	19.1193	17.9003	8.26658	16.3601	11.7701	14.3319	14.5477	9.23092	17.5917	0.134862	0.569052
537	ENSG00000144891.13	<AGTR1>	5.67552	9.30772	17.9613	15.8947	18.9245	26.4623	3.56698	28.8287	26.6787	7.59137	17.958	16.0639	118.532	21.6603	11.3102	51.7878	17.1529	10.8922	37.072	23.9781	47.4631	-0.346566	-0.547639
538	ENSG00000180772.6	<AGTR2>	0	0	0	0	0	0	0	0	0	0	0	0	0	0	0	0	0	0	0	0	0	0	1
539	ENSG00000177674.11	<AGTRAP>	47.6357	40.3028	60.5634	37.2662	63.7516	88.0275	39.0334	52.2195	42.2459	25.368	63.8173	39.7898	53.3971	53.3591	34.4378	49.8429	69.3885	32.82	45.6285	67.0681	33.3725	-0.147799	0.0128832
540	ENSG00000172482.4	<AGXT>	0.14057	0.367894	0.0374194	0.138215	0.146136	0	0.11089	0.324121	0	0.276679	0	0	0.342058	0	0	0	0	0.125404	0	0	0.068987	0.354774	0.630602
541	ENSG00000113492.9	<AGXT2>	0	0	0	0	0	0	0.0924087	0	0	0	0.123848	0	0	0	0	0	0	0	0	0	0	0	-0.0210275
542	ENSG00000153207.10	<AHCTF1>	40.1328	41.2225	52.1814	46.9758	48.6631	56.9394	28.4804	36.8237	22.8146	32.0601	24.6458	28.8163	38.3825	24.9165	25.7579	16.8558	35.5945	37.46	40.463	28.9929	62.0021	0.481495	0.46734
543	ENSG00000101444.8	<AHCY>	5.51738	15.6723	3.21807	3.93912	8.47586	7.92474	4.60195	5.25796	10.0946	4.68625	3.46776	3.99835	2.3404	9.67875	4.62177	6.82622	2.71034	4.76535	8.41588	0.817224	4.29444	0.296334	0.481812
544	ENSG00000168710.13	<AHCYL1>	90.7556	102.017	99.7228	95.8693	93.1249	128.978	92.3163	94.6613	105.328	69.0832	80.7138	98.8492	118.712	116.199	84.2064	119.669	87.7544	91.2046	117.805	85.7342	79.9387	0.0625097	-0.0479592
545	ENSG00000158467.12	<AHCYL2>	27.991	23.0486	26.7923	26.2608	22.6145	27.2129	19.1656	26.92	35.9969	25.783	28.8036	31.2118	23.782	37.7435	26.4343	26.3324	23.2559	41.3296	24.3516	21.0992	26.353	0.00929315	-0.270057
546	ENSG00000126705.9	<AHDC1>	17.0968	22.1104	16.1652	22.7018	19.7831	24.0361	5.17489	12.0465	16.3807	18.2435	26.4859	26.0157	16.8509	26.1038	20.5162	13.805	28.1648	35.8118	17.2183	0.780077	17.7986	-0.209927	-0.323319
547	ENSG00000135541.16	<AHI1>	66.8938	45.2878	35.0433	45.5073	51.6954	113.024	52.1185	65.6525	44.7419	44.0438	32.8729	77.5011	42.9733	58.3244	52.0795	36.6481	50.2266	64.4398	89.7811	30.7759	61.4674	-0.0987371	0.0733365
548	ENSG00000124942.9	<AHNAK>	1792.02	1590.54	1221.58	1589.52	1429.84	1240.19	769.432	1432	1413.29	1484.07	908.534	1599.01	710.005	1226.45	724.51	953.479	1052.12	1432.38	943.562	485.245	1342.76	0.585421	0.828139
549	ENSG00000185567.6	<AHNAK2>	24.4768	52.3697	41.704	20.9741	35.1821	43.813	60.2874	120.627	72.4559	39.3057	61.6411	38.3807	70.464	41.5395	26.0397	76.2897	73.8425	74.9558	22.3838	47.5662	66.193	-0.522566	-0.0954792
550	ENSG00000106546.8	<AHR>	68.6334	19.5352	17.082	72.6147	92.9605	13.1788	4.74981	21.8782	11.0376	36.1412	19.7804	60.6975	3.63662	36.1604	10.2769	14.93	5.49649	22.2503	26.3897	2.08021	28.8366	0.0644345	0.419205
551	ENSG00000063438.12	<AHRR>	10.8766	0.423078	0.991615	4.37105	3.63512	5.09697	0.184817	0.504188	2.05221	6.22527	5.2901	0.493189	6.15705	7.57389	0.187877	1.56355	0.265348	3.90544	5.8507	0.278599	1.29351	0.696303	0.102246
552	ENSG00000100591.3	<AHSA1>	40.8181	108.014	73.0989	93.8825	80.064	28.1032	41.6948	74.962	54.3188	72.3342	55.5372	69.4692	46.5919	101.627	64.1412	139.766	58.1681	48.0118	43.7134	68.9626	37.2185	0.319594	0.00191584
553	ENSG00000173209.18	<AHSA2>	320.377	188.472	236.079	223.148	220.281	393.95	216.809	190.133	183.571	259.732	252.899	257.339	304.846	241.537	141.058	154.906	122.42	184.935	238.983	194.592	311.787	-0.107969	0.26641
554	ENSG00000145192.8	<AHSG>	0.122999	0	0.187097	0	0	0	0	0	0	0.50148	0	0	0	0	0	0	0	0.250808	0	0	0.155221	0	0.246243
555	ENSG00000169877.5	<AHSP>	0	0	0	0	4.00046	0	0.665343	0.504188	0.573139	0	0	0.775011	0	0	0	0	0.473836	0.394127	0.632508	0	0	0	0.289557
556	ENSG00000111732.6	<AICDA>	0.860992	1.41639	0.299355	0	0	0	0	0.396148	0.443721	0	0.176926	0.158525	0.342058	0.431766	0.319391	0.114406	0	0.143319	0.175697	0.594345	1.29351	-0.0592746	0.00295579
557	ENSG00000186063.8	<AIDA>	1.59899	2.4281	2.35742	1.50309	3.92739	8.30876	1.27524	2.82705	3.54977	2.36906	1.75157	5.88304	3.13253	2.7705	1.91634	3.08896	2.4829	4.85493	1.63398	0.334319	3.4666	-0.174163	0.0657846
558	ENSG00000204472.8	<AIF1>	56.6849	75.4551	122.362	45.4381	103.007	38.1051	84.1474	33.2404	35.6826	16.1511	100.972	44.4927	29.309	32.3465	123.886	67.0801	76.932	57.3455	40.7441	105.626	24.4559	-0.165909	-0.060107
559	ENSG00000126878.8	<AIF1L>	33.157	31.3998	6.96001	29.6817	4.80421	4.45112	49.4941	19.8254	36.4221	37.1268	17.3565	17.4378	28.3188	25.6361	18.9568	22.0613	36.239	29.6491	24.9138	9.88098	20.4374	0.460312	0.14707
560	ENSG00000156709.9	<AIFM1>	10.5076	15.1021	4.11614	7.37722	13.0243	20.9814	17.2619	12.2626	6.52639	6.65758	10.6333	8.10239	12.5121	7.86174	9.11203	16.8558	18.4985	12.2358	11.0162	30.9059	7.46784	0.0454901	-0.208435
561	ENSG00000042286.10	<AIFM2>	1.58141	0.790973	1.08516	2.24599	2.81311	2.65322	1.94058	2.80905	0.480698	0.864621	2.03465	0.986378	6.04903	3.59805	2.10422	7.28385	1.81953	1.50485	4.55055	0.11144	1.39699	-0.164828	-0.46751
562	ENSG00000183773.11	<AIFM3>	5.69309	2.75921	3.23678	4.95846	3.43418	4.03219	0.572934	1.42253	3.8086	3.23368	5.34318	3.89267	2.71846	2.5906	2.12301	2.30719	2.06592	3.35008	2.02051	3.43606	2.70774	0.257851	0.196694
563	ENSG00000146416.12	<AIG1>	49.6388	33.8831	61.6672	65.3065	35.2735	43.5686	39.939	37.2559	38.8256	45.0813	52.5294	69.2578	43.8195	31.8427	48.9607	55.7348	42.2472	64.5114	47.2449	44.873	44.8416	-0.176264	-0.30312
564	ENSG00000112297.10	<AIM1>	2.10855	0.294315	0.505162	0.27643	0	0.349107	0	0.864322	0.591628	0	0.760783	1.42673	3.76264	1.38525	0	2.32626	2.46395	0.69868	0	0	3.53558	-1.19805	-0.653095
565	ENSG00000176092.9	<AIM1L>	0.720422	0.607025	0.0561291	0.27643	0.383606	1.27424	1.0165	0.846316	0.813488	0.397726	0.0884632	0.105683	0.612104	0.269854	1.59695	0.24788	0.341162	0	0.790636	0.130013	0.655377	0.596092	0.338306
566	ENSG00000163568.9	<AIM2>	2.12612	0.570236	1.16	2.93707	2.3747	0.209464	1.14587	1.22446	1.86733	0.985668	0.813861	0.810239	3.29456	1.54716	0.657569	0.552962	0.833951	2.22144	1.30016	1.0401	1.60395	0.135898	0.107674
567	ENSG00000164022.12	<AIMP1>	73.6588	60.8313	65.7834	59.3633	66.7839	101.59	75.4979	73.8996	65.3934	54.817	49.7163	71.6005	74.8747	75.7929	53.3007	86.224	70.81	72.5194	80.8732	46.6561	79.956	-0.128784	0.0246923
568	ENSG00000106305.5	<AIMP2>	0.82585	2.94315	2.5071	1.88318	4.38407	0	2.03299	1.53057	5.54651	2.81866	0.813861	2.51879	2.9345	2.53662	2.36725	1.46821	1.9143	2.59765	5.74528	7.87507	6.79522	-0.132558	-0.342923
569	ENSG00000110711.5	<AIP>	5.34167	12.7475	3.44259	10.7635	4.98687	1.06478	8.53856	8.91332	7.87605	12.8656	9.64249	7.29215	4.7168	6.36855	13.7714	9.6101	6.84219	4.17416	12.4218	3.15746	9.5547	0.160204	-0.0587353
570	ENSG00000129221.10	<AIPL1>	0	0	0	0	0	0	0	0	0	0	0	0	0	0	0	0	0.113721	0	0	0	0	0	-0.264629
571	ENSG00000160224.12	<AIRE>	0.983991	0.827762	0.785808	0.621967	0.292271	1.53607	1.57095	0.342128	0.277326	1.03755	2.77774	2.27219	0.180031	0.449756	0.507268	0.32415	0.416975	1.37944	1.58127	0.390039	1.56945	0.375575	-0.246819
572	ENSG00000196581.6	<AJAP1>	0.439282	0.643815	0.804518	0.587413	0.146136	1.57098	0.979532	0.522195	1.22023	0.657112	0.513086	0.898309	0.828141	0.971473	1.5218	0.362286	1.40255	1.28987	0.474381	0.185733	1.17278	-0.281468	-0.191758
573	ENSG00000129474.11	<AJUBA>	11.7025	13.5385	6.90389	16.8277	9.93722	12.8821	21.0137	13.0369	16.8429	15.9782	14.5787	9.67003	9.91969	8.99512	11.3478	10.3537	8.39637	20.2259	5.25333	13.057	7.51958	0.404068	0.53317
574	ENSG00000106992.13	<AK1>	368.715	221.859	230.766	266.34	321.115	228.77	238.729	162.457	281.985	283.561	267.76	286.42	240.629	218.671	274.018	150.196	265.765	307.007	299.598	197.23	239.661	-0.0735291	0.143982
575	ENSG00000004455.12	<AK2>	133.032	108.455	110.032	94.2626	137.769	100.595	115.807	97.9925	115.164	118.522	102.033	119.158	87.873	122.999	108.724	94.7282	100.093	120.943	153.418	68.4611	118.089	0.050278	0.166651
576	ENSG00000147853.12	<AK3>	93.321	71.5554	105.56	92.5349	67.8617	96.9646	86.5685	82.8669	108.286	62.4948	65.6928	81.7989	79.2855	85.4716	83.1731	141.12	95.1652	89.5743	85.8454	77.3205	71.2118	0.105989	-0.00300542
577	ENSG00000162433.10	<AK4>	10.7888	11.6071	4.75227	16.1193	16.4037	24.2281	23.7675	12.2986	13.0158	12.9693	10.5979	8.71888	17.427	12.0535	14.7295	20.841	10.7276	15.4426	26.8816	11.7755	12.159	0.0920054	-0.00911531
578	ENSG00000154027.14	<AK5>	77.2081	28.6406	28.2517	58.2921	25.6103	50.4286	45.1694	29.2969	69.165	103.391	64.4897	100.787	3.22255	32.6883	62.6569	20.3261	24.1277	82.8204	30.5888	46.6746	68.5041	0.0339811	0.0697326
579	ENSG00000140057.4	<AK7>	0.228426	0.257526	0.617421	1.74496	0.602809	0.925135	0.776233	0.504188	1.14628	0	0.636935	0.176139	0.954162	2.7705	0.544843	1.08686	0.909764	0.0716594	0.333824	0.872944	0.258701	-0.0344407	-0.113298
580	ENSG00000165695.5	<AK8>	2.16127	0.386289	0.130968	1.00206	1.47962	0	0	3.38526	1.44209	5.49899	1.38003	2.09605	2.01634	4.2457	0.901809	0.419489	2.91883	4.69369	0.597369	2.26594	1.13829	-0.54718	-0.226655
581	ENSG00000155085.11	<AK9>	10.4022	4.10202	8.13873	11.9038	7.36158	7.83746	5.93264	6.7165	5.74988	5.91401	2.77774	8.75411	7.77732	5.82884	5.24177	6.3686	4.73836	5.37446	3.53151	3.2689	5.15678	0.392887	0.696993
582	ENSG00000121057.8	<AKAP1>	44.5256	45.4533	42.8452	56.5299	41.8313	57.2536	50.5476	48.9603	57.1291	41.1214	47.027	62.7055	135.023	52.9813	41.0323	79.474	58.8125	52.0785	64.8497	29.9587	43.8068	-0.164839	-0.420514
583	ENSG00000108599.10	<AKAP10>	4.32253	3.8261	7.85808	12.8885	1.11428	13.2137	4.17687	7.58083	9.04081	5.18773	3.45006	9.08877	3.5286	10.8841	5.0351	16.5126	4.13185	4.37123	2.65302	0.650065	6.22608	0.49902	0.145425
584	ENSG00000023516.7	<AKAP11>	0	0	0	0	0	0	0	0	0	0	0	0	0	0	0	0	0	0	0	0	0	0	1
585	ENSG00000131016.12	<AKAP12>	95.8161	147.231	205.489	150.499	81.0139	155.405	100.19	126.065	126.719	113.421	165.373	171.559	111.151	125.374	64.9866	308.439	183.848	119.277	124.218	93.5164	142.855	0.0116223	-0.220614
586	ENSG00000170776.15	<AKAP13>	122.261	160.383	185.488	117.638	183.985	94.6954	91.3737	180.661	141.602	97.0969	132.783	126.714	154.934	139.982	56.4946	232.797	170.865	124.849	199.978	209.804	253.182	-0.231058	-0.385011
587	ENSG00000186471.8	<AKAP14>	0	0	0	0	0	0	0.628379	0	0	0	0	0	2.01634	0	0.112726	0	0	0.358297	0	1.26298	0	0	-0.394571
588	ENSG00000197976.6	<AKAP17A>	78.0516	50.7142	68.4027	24.6714	73.2322	47.4786	61.1746	65.6525	63.6924	39.5651	75.4591	75.2113	80.1676	77.8978	61.323	18.877	41.508	58.9399	103.942	12.3141	85.2507	-0.266681	-0.169362
589	ENSGR0000197976.6	<AKAP17A>	0	0	0	0	0	0	0	0	0	0	0	0	0	0	0	0	0	0	0	0	0	0	1
590	ENSG00000241978.5	<AKAP2>	48.7603	44.3313	60.5446	56.3399	58.9291	60.2734	48.3852	48.24	56.2971	47.7098	48.9024	90.3417	119.522	52.9633	53.6013	98.065	74.1458	54.4612	92.5044	38.0381	74.437	-0.493288	-0.748449
591	ENSG00000111254.3	<AKAP3>	2.28426	1.7475	2.32	1.83135	1.33349	0.94259	1.42309	1.04439	1.68244	0.881913	0.0884632	1.49718	0.522089	0.305834	0	1.67795	2.65348	1.97063	0.614939	0	1.37974	0.880606	0.55217
592	ENSG00000147081.10	<AKAP4>	0.0351425	0.220737	0.299355	0.0691075	0.23747	0	0	0.0720269	0.166395	0.415018	0	0.105683	2.14236	0	0	0.114406	0.151627	0.0537446	0.0702787	0	0.189714	0.118764	-0.162047
593	ENSG00000179841.8	<AKAP5>	0.527138	0.441473	0.467743	0.656521	0.511474	1.04732	0.295708	0.918342	0.573139	0.553357	0.566164	0.563645	0.738126	1.24133	0.356966	0.400421	0.454882	0.447872	0.755496	0.315746	0.413922	0.123532	0.0906083
594	ENSG00000151320.6	<AKAP6>	1.54627	0.754183	4.17227	4.87208	3.79952	1.78045	0.499007	1.72864	1.01686	1.05484	1.38003	3.89267	5.887	1.40324	1.33393	1.44914	0.682323	0.949488	2.28406	1.50444	3.2079	0.133056	-0.0253281
595	ENSG00000118507.11	<AKAP7>	10.2616	9.19736	19.3271	10.6425	13.0791	17.8568	17.1511	9.14741	13.8848	8.64621	10.014	19.1639	11.918	14.2843	8.98052	22.1757	12.3008	16.0696	8.9254	9.50952	25.025	-0.0504544	-0.215194
596	ENSG00000105127.4	<AKAP8>	38.8325	24.281	23.0878	37.8018	28.8435	34.8584	22.8989	27.7483	23.0735	25.1605	18.825	32.48	31.8294	40.7839	13.5835	21.5465	27.0276	30.1865	35.9476	30.7759	18.0229	-0.187085	0.123706
597	ENSG00000011243.13	<AKAP8L>	332.325	231.847	192.766	247.56	262.35	238.58	189.844	299.758	297.256	261.116	284.993	267.978	245.796	336.004	226.504	118.677	172.685	236.154	359.317	153.731	287.745	0.0491873	0.124129
598	ENSG00000127914.12	<AKAP9>	88.6822	61.4199	128.554	83.1708	50.1062	129.484	62.8194	82.4708	64.0437	64.6045	61.5173	76.3562	90.6994	86.713	44.3577	59.0144	61.7503	65.3176	66.9932	50.7236	96.8405	0.169785	0.384242
599	ENSG00000166452.7	<AKIP1>	22.1222	32.5586	30.9272	26.4509	27.7109	34.7362	36.2242	20.7617	36.3296	32.0429	32.3775	23.6731	32.6576	23.0635	28.8203	36.6099	40.3329	34.1816	27.4965	15.7316	32.01	-0.0234867	0.0296937
600	ENSG00000174574.11	<AKIRIN1>	40.2382	41.8112	40.8246	36.8861	34.3601	43.621	60.4353	41.6855	51.9893	34.7405	34.4653	39.5608	51.2187	60.7171	49.2613	48.8323	44.5974	44.7155	64.8848	32.2618	53.051	-0.240581	-0.38408
601	ENSG00000135334.8	<AKIRIN2>	8.69778	2.75921	9.33615	9.67504	3.59859	15.5178	5.43363	7.41877	2.58837	2.957	6.2455	6.27055	6.64313	15.6155	2.4424	9.03807	8.56695	7.4705	7.48468	0.427185	1.10379	-0.0444928	0.0534224
602	ENSG00000106948.12	<AKNA>	22.0519	21.3195	43.4627	18.2962	19.436	26.5496	12.7154	32.7002	21.7238	12.1566	26.6628	26.7379	58.0599	33.3179	14.2599	30.2985	22.1755	28.1263	36.9139	11.1625	25.0768	-0.306693	-0.347451
603	ENSG00000162641.14	<AKNAD1>	1.45842	3.27426	2.03936	0.950227	1.02295	3.43871	2.3287	3.25922	2.97663	1.29693	3.85699	4.75575	2.14236	1.90697	0.826658	6.92156	5.13638	2.06021	1.01904	5.73914	5.96738	-0.698933	-0.615038
604	ENSG00000117448.9	<AKR1A1>	70.4256	87.2093	73.155	67.4489	106.478	92.5833	102.001	80.0218	89.2988	63.3075	89.507	84.7052	73.9386	90.419	102.9	56.0971	76.0791	82.2292	88.0944	60.3631	88.976	-0.018569	0.0984435
605	ENSG00000085662.9	<AKR1B1>	120.732	81.9668	140.66	131.425	48.5718	127.058	131.941	96.552	112.372	123.572	118.399	80.5131	63.5688	156.821	130.612	49.0992	74.5817	136.493	110.215	42.1428	124.97	0.147724	0.264301
606	ENSG00000198074.5	<AKR1B10>	0.808278	4.94818	10.6271	0	1.55269	1.46625	1.3122	16.4942	2.90267	1.07213	0.583857	1.03922	2.86249	1.1154	4.20844	6.27326	0.530696	1.27196	0	14.0228	4.86358	0.181473	0.11547
607	ENSG00000227471.4	<AKR1B15>	0.28114	0.128763	0.580001	0.138215	0.0730678	0.314197	0.499007	1.45854	0.258837	0	1.71619	0.581259	1.58427	0.341815	0.48848	0.514827	0.473836	0.841998	0.948763	0.315746	1.29351	-0.489802	-0.692011
608	ENSG00000187134.8	<AKR1C1>	76.4174	93.9602	124.363	71.6817	92.3759	119.692	127.376	151.617	197.4	66.1435	195.132	158.613	303.118	158.242	323.261	377.616	391.312	219.457	294.679	118.646	178.245	-1.03522	-1.31045
609	ENSG00000151632.12	<AKR1C2>	78.6138	88.8097	71.6208	101.571	81.5436	64.4103	113.681	76.2944	137.35	46.9835	165.78	159.177	130.864	156.065	231.915	339.9	125.889	196.58	226.139	100.649	161.292	-1.00567	-1.3393
610	ENSG00000196139.7	<AKR1C3>	28.3952	45.1406	49.0007	40.5142	49.5217	25.7816	38.0354	44.6567	68.0372	25.5582	71.6021	74.5949	129.352	33.6238	91.0451	131.338	59.8928	55.751	41.605	38.8367	43.2031	-0.487177	-0.776396
611	ENSG00000198610.6	<AKR1C4>	0	0	0	0	0	0	0	0	0	0	0	0	0	0	0	0	0	0	0	0	0	0	1
612	ENSG00000196326.6	<AKR1CL1>	0	0	0	0	0.730678	0	0	0	0.0739535	0.0864621	1.32695	0.105683	0.450077	0.467746	0.24424	1.54448	0	1.07489	1.95023	0	0	-0.926116	-0.759113
613	ENSG00000122787.10	<AKR1D1>	0.0702851	0.110368	0	0	0.127869	0	0	0	0	0	0	0	0.288049	0	0	0	0	0	0	0	0.120727	0	-0.050378
614	ENSG00000165568.13	<AKR1E2>	7.30965	11.6255	6.62324	12.733	14.3578	11.9395	6.24683	12.3526	7.72814	12.5889	7.99707	10.9911	16.4728	13.6906	6.83872	5.91098	6.93695	12.1284	10.6999	7.59647	13.3835	0.13311	0.024256
615	ENSG00000053371.8	<AKR7A2>	4.05896	3.42142	6.81034	7.20445	2.99578	1.74554	2.1254	1.0624	5.28767	5.18773	5.64395	5.49554	3.74464	3.49011	7.53386	2.09744	2.72929	6.1448	5.18306	3.99325	1.77642	-0.0836318	-0.128907
616	ENSG00000162482.4	<AKR7A3>	0	0	0	0	0	0	0	0	0	0	0	0	0	0	0	0	0	0	0	0	0	0	1
617	ENSG00000142208.11	<AKT1>	205.637	185.952	180.923	219.952	184.807	206.584	184.263	167.102	152.011	153.453	162.471	182.691	172.757	209.263	247.415	129.126	175.869	203.477	272.646	103.23	167.776	0.0692008	-0.00334378
618	ENSG00000204673.6	<AKT1S1>	18.608	37.5068	34.7252	24.0148	17.7372	10.2288	26.6876	29.405	25.6434	14.3873	21.2312	24.2191	28.6069	21.1205	30.0603	21.7371	41.1668	27.6785	21.7864	9.99242	36.1837	0.0351693	-0.157244
619	ENSG00000105221.12	<AKT2>	269.491	206.499	182.42	271.039	217.614	213.043	171.289	215.18	206.792	230.179	271.352	297.957	189.428	244.272	233.756	177.844	177.518	290.991	314.128	65.6565	293.867	-0.189708	-0.17345
620	ENSG00000117020.12	<AKT3>	47.6357	53.2895	69.2821	81.495	56.4631	64.4976	37.2037	53.4619	51.9523	39.7899	35.686	56.3116	68.3576	56.2195	30.0979	80.1033	55.8747	44.8767	44.7851	60.5303	47.9977	-0.065413	0.138165
621	ENSG00000166971.12	<AKTIP>	83.1472	63.5169	64.0059	78.0569	60.4636	104.313	97.1585	63.4016	75.1922	76.761	85.42	114.755	71.2741	90.365	78.401	75.3936	99.695	86.0988	35.6137	80.6823	70.0391	-0.0861464	-0.165233
622	ENSG00000269155.1	<AL009178.1>	0	0	0	0	0	0	0	0	0	0	0	0	0	0	0	0	0	0	0	0	0	0	1
623	ENSG00000268991.1	<AL021920.2>	0	0	0	0	0	0	0	0	0	0	0	0	0	0	0	0	0	0	0	0	0	0	1
624	ENSG00000268427.1	<AL022328.1>	0	0	0	0	0	0	0	0	0	0	0	0	0	0	0	0	0	0	0	0	0	0	1
625	ENSG00000269549.1	<AL031663.2>	0	0	0	0	0	0	0	0	0	0	0	0	0	0	0	0	0	0	0	0	0	0	1
626	ENSG00000267882.1	<AL031666.2>	0	0	0	0	0	0	0	0	0	0	0	0	0	0	0	0	0	0	0	0	0	0	1
627	ENSG00000176515.1	<AL033381.1>	0	0	0	0	0	0	0	0	0	0	0	0	0	0	0	0	0	0	0	0	0	0	1
628	ENSG00000224997.1	<AL049840.1>	0	0	0	0	0	0	0	0	0	0	0	0	0	0	0	0	0	0	0	0	0	0	1
629	ENSG00000269011.1	<AL050303.1>	0	0	0	0	0	0	0	0	0	0	0	0	0	0	0	0	0	0	0	0	0	0	1
630	ENSG00000225683.1	<AL078585.1>	0	0	0	0	0	0	0	0	0	0	0	0	0	0	0	0	0	0	0	0	0	0	1
631	ENSG00000203863.1	<AL079342.1>	0	0	0	0	0	0	0	0	0	0	0	0	0	0	0	0	0	0	0	0	0	0	1
632	ENSG00000269709.1	<AL109659.1>	0	0	0	0	0	0	0	0	0	0	0	0	0	0	0	0	0	0	0	0	0	0	1
633	ENSG00000268552.1	<AL109927.1>	0	0	0	0	0	0	0	0	0	0	0	0	0	0	0	0	0	0	0	0	0	0	1
634	ENSG00000269375.1	<AL117190.3>	0	0	0	0	0	0	0	0	0	0	0	0	0	0	0	0	0	0	0	0	0	0	1
635	ENSG00000267848.1	<AL118506.1>	0	0	0	0	0	0	0	0	0	0	0	0	0	0	0	0	0	0	0	0	0	0	1
636	ENSG00000268628.1	<AL121761.2>	0	0	0	0	0	0	0	0	0	0	0	0	0	0	0	0	0	0	0	0	0	0	1
637	ENSG00000269120.1	<AL133318.1>	0	0	0	0	0	0	0	0	0	0	0	0	0	0	0	0	0	0	0	0	0	0	1
638	ENSG00000235705.4	<AL133481.1>	0	0	0	0	0	0	0	0	0	0	0	0	0	0	0	0	0	0	0	0	0	0	1
639	ENSG00000212673.1	<AL136115.1>	0	0	0	0	0	0	0	0	0	0	0	0	0	0	0	0	0	0	0	0	0	0	1
640	ENSG00000215462.1	<AL136218.1>	0	0	0	0	0	0	0	0	0	0	0	0	0	0	0	0	0	0	0	0	0	0	1
641	ENSG00000203630.3	<AL136531.1>	0	0	0	0	0	0	0	0	0	0	0	0	0	0	0	0	0	0	0	0	0	0	1
642	ENSG00000237847.2	<AL137798.1>	0	0	0	0	0	0	0	0	0	0	0	0	0	0	0	0	0	0	0	0	0	0	1
643	ENSG00000268344.1	<AL138815.2>	0	0	0	0	0	0	0	0	0	0	0	0	0	0	0	0	0	0	0	0	0	0	1
644	ENSG00000269624.1	<AL138847.1>	0	0	0	0	0	0	0	0	0	0	0	0	0	0	0	0	0	0	0	0	0	0	1
645	ENSG00000253459.3	<AL139099.1>	0	0	0	0	0	0	0	0	0	0	0	0	0	0	0	0	0	0	0	0	0	0	1
646	ENSG00000248458.2	<AL139147.1>	0	0	0	0	0	0	0	0	0	0	0	0	0	0	0	0	0	0	0	0	0	0	1
647	ENSG00000269223.1	<AL158091.1>	0	0	0	0	0	0	0	0	0	0	0	0	0	0	0	0	0	0	0	0	0	0	1
648	ENSG00000269305.1	<AL158147.2>	0	0	0	0	0	0	0	0	0	0	0	0	0	0	0	0	0	0	0	0	0	0	1
649	ENSG00000234631.1	<AL162407.1>	0	0	0	0	0	0	0	0	0	0	0	0	0	0	0	0	0	0	0	0	0	0	1
650	ENSG00000228537.1	<AL353608.1>	0	0	0	0	0	0	0	0	0	0	0	0	0	0	0	0	0	0	0	0	0	0	1
651	ENSG00000233889.1	<AL353698.1>	0	0	0	0	0	0	0	0	0	0	0	0	0	0	0	0	0	0	0	0	0	0	1
652	ENSG00000268578.1	<AL354718.1>	0	0	0	0	0	0	0	0	0	0	0	0	0	0	0	0	0	0	0	0	0	0	1
653	ENSG00000268674.1	<AL355149.2>	0	0	0	0	0	0	0	0	0	0	0	0	0	0	0	0	0	0	0	0	0	0	1
654	ENSG00000177596.1	<AL355390.1>	0	0	0	0	0	0	0	0	0	0	0	0	0	0	0	0	0	0	0	0	0	0	1
655	ENSG00000224474.2	<AL355490.1>	0	0	0	0	0	0	0	0	0	0	0	0	0	0	0	0	0	0	0	0	0	0	1
656	ENSG00000268421.1	<AL355531.2>	0	0	0	0	0	0	0	0	0	0	0	0	0	0	0	0	0	0	0	0	0	0	1
657	ENSG00000225996.2	<AL356356.1>	0	0	0	0	0	0	0	0	0	0	0	0	0	0	0	0	0	0	0	0	0	0	1
658	ENSG00000248835.2	<AL357673.1>	0	0	0	0	0	0	0	0	0	0	0	0	0	0	0	0	0	0	0	0	0	0	1
659	ENSG00000269295.1	<AL358113.1>	0	0	0	0	0	0	0	0	0	0	0	0	0	0	0	0	0	0	0	0	0	0	1
660	ENSG00000268211.1	<AL359091.2>	0	0	0	0	0	0	0	0	0	0	0	0	0	0	0	0	0	0	0	0	0	0	1
661	ENSG00000204038.3	<AL359195.1>	0	0	0	0	0	0	0	0	0	0	0	0	0	0	0	0	0	0	0	0	0	0	1
662	ENSG00000205850.6	<AL359736.1>	0	0	0	0	0	0	0	0	0	0	0	0	0	0	0	0	0	0	0	0	0	0	1
663	ENSG00000205740.1	<AL359878.1>	0	0	0	0	0	0	0	0	0	0	0	0	0	0	0	0	0	0	0	0	0	0	1
664	ENSG00000196979.1	<AL360004.1>	0	0	0	0	0	0	0	0	0	0	0	0	0	0	0	0	0	0	0	0	0	0	1
665	ENSG00000204049.1	<AL391421.1>	0	0	0	0	0	0	0	0	0	0	0	0	0	0	0	0	0	0	0	0	0	0	1
666	ENSG00000226974.2	<AL445989.1>	0	0	0	0	0	0	0	0	0	0	0	0	0	0	0	0	0	0	0	0	0	0	1
667	ENSG00000189275.3	<AL450307.1>	0	0	0	0	0	0	0	0	0	0	0	0	0	0	0	0	0	0	0	0	0	0	1
668	ENSG00000240510.2	<AL589765.1>	0	0	0	0	0	0	0	0	0	0	0	0	0	0	0	0	0	0	0	0	0	0	1
669	ENSG00000268172.1	<AL590452.1>	0	0	0	0	0	0	0	0	0	0	0	0	0	0	0	0	0	0	0	0	0	0	1
670	ENSG00000268146.1	<AL590483.1>	0	0	0	0	0	0	0	0	0	0	0	0	0	0	0	0	0	0	0	0	0	0	1
671	ENSG00000269620.1	<AL590560.1>	0	0	0	0	0	0	0	0	0	0	0	0	0	0	0	0	0	0	0	0	0	0	1
672	ENSG00000232850.1	<AL590708.2>	0	0	0	0	0	0	0	0	0	0	0	0	0	0	0	0	0	0	0	0	0	0	1
673	ENSG00000268387.1	<AL590714.1>	0	0	0	0	0	0	0	0	0	0	0	0	0	0	0	0	0	0	0	0	0	0	1
674	ENSG00000269554.1	<AL590822.2>	0	0	0	0	0	0	0	0	0	0	0	0	0	0	0	0	0	0	0	0	0	0	1
675	ENSG00000213121.2	<AL590867.1>	0	0	0	0	0	0	0	0	0	0	0	0	0	0	0	0	0	0	0	0	0	0	1
676	ENSG00000269337.1	<AL591479.1>	0	0	0	0	0	0	0	0	0	0	0	0	0	0	0	0	0	0	0	0	0	0	1
677	ENSG00000267884.1	<AL626787.1>	0	0	0	0	0	0	0	0	0	0	0	0	0	0	0	0	0	0	0	0	0	0	1
678	ENSG00000237683.5	<AL627309.1>	0	0	0	0	0	0	0	0	0	0	0	0	0	0	0	0	0	0	0	0	0	0	1
679	ENSG00000215014.3	<AL645728.1>	0	0	0	0	0	0	0	0	0	0	0	0	0	0	0	0	0	0	0	0	0	0	1
680	ENSG00000268996.1	<AL807752.1>	0	0	0	0	0	0	0	0	0	0	0	0	0	0	0	0	0	0	0	0	0	0	1
681	ENSG00000148218.11	<ALAD>	191.826	140.83	99.3486	188.663	102.076	155.108	115.548	136.509	152.048	257.173	145.54	170.256	44.7916	135.862	115.882	106.379	150.604	197.314	139.784	80.5523	122.469	0.107774	0.404263
682	ENSG00000023330.10	<ALAS1>	29.713	29.5787	28.9252	31.2711	27.3456	29.6741	30.5318	23.6068	25.6064	19.454	34.1822	24.9413	26.3025	27.741	52.9437	40.576	53.5055	25.2062	62.1791	20.8764	20.2132	0.0751957	-0.510236
683	ENSG00000158578.14	<ALAS2>	0.404139	0.0183947	0.168387	0.518306	0.146136	3.01978	0.369635	0.252094	0.22186	0.674404	0.0707705	0.105683	1.36823	10.3624	0.0375754	0.286015	0.530696	0.394127	0.421672	0.185733	0.137974	0.0449038	-0.215855
684	ENSG00000163631.12	<ALB>	11.5443	15.5987	4.07872	2.14233	11.7639	17.4205	13.5102	7.7789	10.4459	6.53653	4.19315	6.72851	3.63662	8.99512	6.53812	1.27753	3.84755	12.6837	8.85512	2.1545	20.6099	0.707761	0.383954
685	ENSG00000170017.8	<ALCAM>	28.7817	12.7107	13.8639	27.522	21.9751	33.5318	22.9174	9.74163	12.9973	21.4772	9.09401	14.6195	3.47459	17.5405	15.6689	16.1694	10.7466	18.7748	11.2797	25.854	12.3142	0.555845	0.648989
686	ENSG00000161618.5	<ALDH16A1>	14.2854	18.1372	16.2587	17.8297	15.6365	22.5873	31.1417	15.8999	15.8445	12.243	21.1604	15.6764	44.8276	23.0995	34.3251	7.76054	24.3931	23.1997	17.8508	30.4973	14.2803	-0.509368	-0.464894
687	ENSG00000059573.4	<ALDH18A1>	24.6701	15.3412	17.9613	26.0017	33.7025	1.72808	17.6131	18.9611	17.8228	15.8053	29.9536	28.7459	17.373	21.1925	28.8015	20.8219	19.7305	22.5369	31.6606	13.2613	23.3521	-0.324863	-0.438243
688	ENSG00000165092.8	<ALDH1A1>	17.1671	9.93314	33.453	14.478	3.41592	13.6501	6.96762	15.3777	13.3486	10.9634	8.84632	52.3485	1.71029	4.13776	9.6193	6.06352	2.00906	8.90369	6.46564	1.5973	10.5723	1.00703	0.22316
689	ENSG00000128918.10	<ALDH1A2>	9.57634	4.69065	4.17227	4.88935	2.2103	9.44336	4.21384	6.39238	10.372	7.47032	9.51864	24.4129	29.381	7.5559	2.02907	11.8982	12.6419	6.50309	5.09521	5.40482	17.3502	-0.706172	-0.626907
690	ENSG00000184254.12	<ALDH1A3>	43.4186	35.9065	19.6639	27.7985	16.8604	18.5725	56.0736	17.1604	16.3992	18.8833	35.863	23.814	8.06537	20.1131	54.597	18.8007	34.988	30.6523	35.5435	11.144	20.9376	-0.29821	0.0157222
691	ENSG00000137124.6	<ALDH1B1>	0	0	0	0	0	0	0	0	0	0	0	0	0	0	0	0	0	0	0	0	0	0	1
692	ENSG00000144908.9	<ALDH1L1>	6.09723	31.3262	47.6349	23.9285	22.9615	50.2191	7.15243	47.8799	26.0131	3.59682	6.12165	7.04556	46.1599	39.6325	7.81568	101.669	37.1677	4.99825	10.7526	62.4433	12.8661	0.930268	-0.110532
693	ENSG00000136010.9	<ALDH1L2>	8.15307	5.59199	3.21807	4.06006	4.4206	6.70286	4.34321	3.43928	7.22895	2.88783	5.75011	10.0047	3.07852	4.73143	0.901809	5.03386	3.69592	5.67901	6.34265	8.52513	7.76104	-0.339932	-0.18558
694	ENSG00000111275.8	<ALDH2>	8.20578	8.29601	6.28646	11.7655	3.45245	6.19666	6.80128	15.2697	5.2507	6.93426	11.0579	7.71489	12.4941	9.98459	3.60724	3.58472	6.36835	4.62203	6.55349	3.82609	2.15584	0.101264	0.270599
695	ENSG00000108602.13	<ALDH3A1>	4.8321	5.42644	2.48839	1.79679	1.37002	8.25639	3.77027	0.144054	0.22186	2.78408	2.67159	3.91029	2.75447	4.6055	1.39029	1.54448	2.46395	6.00148	3.58421	1.95019	3.34587	-0.0533881	-0.00037436
696	ENSG00000072210.14	<ALDH3A2>	122.893	101.373	89.5634	125.603	85.9825	124.317	93.6654	62.1772	124.39	93.3272	90.6748	107.55	71.5082	106.088	99.6311	93.0311	92.4548	126.622	67.696	71.0613	80.8873	0.076537	0.383899
697	ENSG00000006534.11	<ALDH3B1>	84.7462	136.194	58.1311	59.3806	69.7614	77.5193	69.1956	79.5176	116.532	93.6384	55.1656	61.9305	29.111	87.5945	67.2975	66.0313	91.3555	66.285	41.1482	94.9651	46.8077	0.248156	0.616456
698	ENSG00000132746.10	<ALDH3B2>	0.82585	0.220737	0	0.32826	0.0365339	0	0.221781	0.666248	0.795	0.103755	0.26539	0.158525	0.342058	0.0359805	0.24424	0	0	0.537446	0.228406	0.650065	0.707117	-0.0452511	0.0795317
699	ENSG00000159423.12	<ALDH4A1>	17.0441	30.6272	17.3626	17.225	18.4496	17.7347	24.3774	34.1047	42.856	25.4371	22.7704	26.2975	29.111	45.8212	23.9543	45.7433	27.7478	23.773	29.5873	35.475	22.1103	-0.366319	-0.461018
700	ENSG00000112294.8	<ALDH5A1>	13.8286	10.4114	9.54196	14.8063	5.04168	21.7669	13.9352	10.4799	11.8141	18.9006	14.7026	17.5082	6.39109	13.6726	12.1932	8.48511	12.1681	21.3903	11.104	10.6796	10.7102	0.0725378	0.0657819
701	ENSG00000119711.8	<ALDH6A1>	45.7556	53.5286	36.2033	59.7952	38.2692	56.7998	34.8566	56.6131	58.2753	48.5744	25.9905	46.0427	42.6313	58.2524	23.7852	61.8746	45.4314	32.6946	29.5346	59.4345	25.6287	0.257281	0.452436
702	ENSG00000164904.11	<ALDH7A1>	74.467	100.472	81.1815	83.0844	100.541	127.913	96.6965	106.762	101.279	92.4971	85.3847	143.518	68.7717	102.418	75.8835	143.065	98.1977	108.564	55.6607	110.177	71.9707	0.00563829	-0.0061813
703	ENSG00000118514.9	<ALDH8A1>	0.614994	2.68563	0.823227	0.518306	1.04122	4.78277	1.60791	2.03476	1.73791	2.69762	3.52083	2.97675	1.69229	4.9833	0.864234	0	2.16069	6.01939	4.07617	1.65302	6.64	-0.678111	-0.516964
704	ENSG00000143149.8	<ALDH9A1>	12.1242	11.1656	9.20518	11.921	10.1382	22.2381	28.3325	8.48116	13.2007	16.618	23.8674	23.585	11.0359	19.5014	12.0993	38.1925	11.2204	29.3983	27.5668	11.4597	14.5218	-0.675568	-0.529809
705	ENSG00000149925.12	<ALDOA>	1366.53	1807.43	1579.75	1319.07	1638.25	2073.38	1807.64	1508.01	1886.28	1532.96	1905.37	1554.88	1843.35	2296.35	1931.09	1646.13	2062.64	1397.86	2132.92	2315.44	1403.06	-0.243836	-0.51836
706	ENSG00000136872.13	<ALDOB>	0	0.735788	0	0	0	0	0	0	0	0	0	0	1.35023	0	0	0	0	0	0	0	0	0	-0.102508
707	ENSG00000109107.9	<ALDOC>	129.43	204.42	38.3736	122.942	69.524	453.054	160.865	387.919	342.294	529.079	180.164	140.894	32.4055	322.745	164.618	115.779	342.811	184.774	172.183	563.587	184.368	0.0196586	0.112866
708	ENSG00000033011.7	<ALG1>	2.44241	5.35286	5.48195	9.81326	5.55315	5.84755	12.7154	5.61809	6.72977	7.62596	6.0155	6.64044	3.5106	4.91134	3.5133	10.8114	2.69139	9.33364	3.7072	3.64036	3.48384	0.567025	0.367025
709	ENSG00000139133.2	<ALG10>	4.51582	3.1455	2.18904	2.33238	4.11006	7.9422	2.34718	1.92672	1.44209	2.04051	1.73388	1.55002	2.3764	4.08379	1.91634	1.65889	1.25093	1.09281	3.3031	1.00296	1.98338	0.346228	0.559502
710	ENSG00000175548.4	<ALG10B>	1.01913	1.3796	0.336775	3.69725	1.79016	6.61559	0.757751	2.32287	1.68244	1.03755	1.4508	6.55237	2.25038	1.27731	0.300603	0.533895	0.682323	1.23613	1.388	0.501478	3.06992	0.192513	0.122347
711	ENSG00000253710.1	<ALG11>	5.60523	6.53012	8.55034	5.26944	6.94144	6.21411	3.53001	5.34799	6.00872	3.8735	5.64395	9.30014	6.66113	4.19173	6.08721	8.27537	5.0037	6.96888	7.3617	1.5973	8.5199	-0.183239	-0.205037
712	ENSG00000182858.9	<ALG12>	18.2565	12.4164	10.6645	16.8795	16.0201	10.9794	20.0342	17.9887	24.1643	12.4678	9.92557	20.2384	14.4925	13.6186	20.4786	17.1418	16.6411	18.2373	13.5989	13.1499	17.471	-0.016192	0.0146275
713	ENSG00000101901.6	<ALG13>	73.852	69.1089	75.6434	75.0507	97.9108	104.82	81.1348	81.9486	75.8948	92.7047	76.786	78.0824	93.904	86.713	67.1472	74.2114	69.9192	66.7866	74.882	66.1766	61.7951	0.0807952	0.567871
714	ENSG00000172339.9	<ALG14>	0.96642	2.52008	0.63613	23.2374	18.5592	0	2.75378	3.79942	1.34965	12.7099	3.06083	5.24894	1.38624	0.539707	2.8933	2.80295	3.24104	3.36799	1.5637	0	2.67325	-0.0744018	0.494858
715	ENSG00000189366.5	<ALG1L>	0	0	0	0	0	0	0	0	0	0	0	0	0	0	0	0	0	0	0	0	0	0	1
716	ENSG00000119523.8	<ALG2>	23.7036	21.7058	23.8736	43.3304	23.7288	29.7789	27.5008	21.7341	26.198	24.5898	23.0712	19.4105	17.715	25.6541	24.3676	35.0464	25.9851	33.8949	29.4468	28.0456	17.7814	-0.0806746	0.12913
717	ENSG00000214160.5	<ALG3>	28.1316	33.9934	23.9859	29.1979	34.6341	41.5438	25.283	25.4255	29.9696	17.6556	23.0712	22.4225	22.0538	44.0581	30.3985	22.4998	25.3786	23.1639	48.8788	19.1676	17.264	0.307201	0.153068
718	ENSG00000120697.4	<ALG5>	13.4947	17.475	9.95357	13.2514	12.8234	17.9092	16.8184	11.0201	13.2192	18.866	12.1195	9.15923	5.32891	9.48086	8.5484	6.15886	16.1294	11.6984	12.3691	17.9604	18.9542	0.185592	0.522477
719	ENSG00000088035.11	<ALG6>	23.7915	18.9649	12.1239	25.8462	19.5274	47.0248	14.9517	22.6164	18.2295	30.158	17.7634	20.8372	16.4188	22.5957	13.5271	12.2033	14.2719	18.8464	21.7513	16.0845	19.6958	0.240197	0.545747
720	ENSG00000159063.8	<ALG8>	37.7079	55.1473	43.1446	24.9651	49.6313	34.2824	48.7179	45.4489	47.4412	42.401	35.1376	39.5784	38.4365	56.1116	39.9238	38.898	58.9072	31.5302	45.3298	42.5514	41.8579	0.148188	0.0267294
721	ENSG00000086848.10	<ALG9>	60.7263	50.3831	54.4453	49.5846	57.6139	72.9809	59.9732	44.1885	46.3873	51.8773	48.3186	57.8617	50.4986	63.7754	43.2868	58.2517	53.3728	51.6665	61.5642	61.2918	78.8349	-0.12114	-0.183724
722	ENSG00000171094.11	<ALK>	0.193284	0.0367894	0.299355	0	0.347072	0.314197	0	0	0.388256	0.397726	0	0.493189	0.0180031	0	0	0.0953383	0	0	0	0	0.448416	0.577866	0.402182
723	ENSG00000100601.5	<ALKBH1>	14.9531	15.194	15.9594	18.9182	13.1339	26.026	20.6811	15.7559	18.0262	15.4594	16.6842	22.7924	21.3336	21.9841	17.6229	20.7075	18.5744	18.8823	14.2139	20.2263	17.4537	-0.244773	-0.380222
724	ENSG00000189046.6	<ALKBH2>	46.8626	49.537	45.764	26.5718	46.6538	39.7808	70.2491	39.5608	43.2998	27.9964	31.7229	46.9939	43.6754	53.9348	41.145	30.6608	41.2427	35.0415	51.2508	29.0672	72.3674	0.109424	0.0145404
725	ENSG00000166199.8	<ALKBH3>	41.802	35.3178	33.7149	28.4032	31.2182	53.972	59.0122	37.9942	44.9082	35.9855	41.1708	44.1052	38.5446	26.0499	43.8693	39.3938	39.9349	47.3669	32.9431	41.4555	41.1508	-0.151843	0.0523104
726	ENSG00000160993.3	<ALKBH4>	7.90707	11.1288	8.58776	6.9453	3.96393	3.68308	12.9003	10.732	9.52151	8.61162	7.11244	6.56998	7.6153	8.40144	7.0266	5.85377	9.17346	8.76037	7.13329	8.02365	11.6933	0.165174	0.136195
727	ENSG00000091542.8	<ALKBH5>	29.4319	19.1305	23.9671	43.1058	27.0168	34.7013	38.7377	26.3258	37.0137	44.4415	30.7321	19.2168	37.7524	27.1113	27.7118	30.0316	16.4326	29.5237	34.9812	110.567	27.7673	0.117291	-0.119895
728	ENSG00000239382.6	<ALKBH6>	55.1211	111.159	40.4317	43.5895	53.3577	85.1997	49.7898	54.8845	67.8338	73.1296	58.3503	45.0035	46.1959	72.9684	34.2875	41.5866	59.9686	61.3226	52.9023	77.6734	79.5593	-0.0844904	0.23518
729	ENSG00000125652.3	<ALKBH7>	46.8626	38.2242	52.2375	62.4904	37.5568	75.704	33.2302	51.8953	66.0959	78.1271	41.2238	15.8877	33.6657	44.292	74.4744	65.4784	52.8611	53.7446	47.2097	94.1108	51.1194	0.0262292	0.0786093
730	ENSG00000137760.10	<ALKBH8>	8.55721	10.7425	8.81228	8.22379	10.4122	13.685	9.48113	9.90369	10.0022	5.53357	6.05088	9.61719	10.2797	10.7402	6.76357	8.73299	8.03625	9.70985	9.13623	4.51331	11.3829	0.0809544	0.304509
731	ENSG00000151360.5	<ALLC>	19.469	18.4315	34.6504	1.6413	3.89086	2.12956	23.1391	22.8505	8.07942	18.3645	42.4092	15.465	2.46642	41.6654	12.7005	23.6058	9.6852	48.0656	6.99273	39.7468	49.8086	-0.351143	-0.539196
732	ENSG00000116127.13	<ALMS1>	19.469	18.7258	20.6368	25.086	20.8974	15.5353	20.4593	19.7714	19.4128	28.7746	17.4096	23.4969	17.2109	18.0262	20.1592	21.8897	18.8397	21.2829	27.725	18.4804	18.1436	0.0921516	0.13137
733	ENSG00000108839.7	<ALOX12>	0.82585	1.21405	0.0935486	1.08844	0.456674	0	0.462043	0.522195	0	1.08942	0.371545	0.880695	1.35023	1.49319	0.225452	0.953383	0.66337	0.788254	0.52709	0.761504	1.03481	-0.376832	-0.40969
734	ENSG00000179477.5	<ALOX12B>	0.474424	0.183947	0	0	0.274004	0.541117	0.184817	0.16206	0	0	0	0	0.126021	0	0.206665	0	0.379069	0	0	0.0185733	0	0.428686	0.495471
735	ENSG00000161905.8	<ALOX15>	0	0	0	0	0	0	0.0554452	0	0.277326	0.622527	0.0884632	0.299436	0.288049	0	0	0	0.246395	0.214978	0.0702787	0	0	-0.189739	-0.0549012
736	ENSG00000179593.11	<ALOX15B>	4.4631	22.4967	121.95	2.00412	5.68102	3.91	5.28578	15.0536	6.60035	0.847328	0.760783	0.493189	1.94433	14.662	0.582418	8.79019	0.871858	0.358297	0.755496	53.621	2.1041	2.12483	0.276993
737	ENSG00000012779.6	<ALOX5>	40.5018	38.2058	51.1711	14.6162	34.4149	35.8708	31.9734	46.8535	16.1219	10.3582	31.9175	22.6515	23.422	43.7163	16.7586	8.8474	15.5608	25.26	24.2462	18.9076	52.5854	0.575276	0.329131
738	ENSG00000132965.5	<ALOX5AP>	0	0.3495	0	0	0	0	0	0	0	0	0.300775	0	0	0	0	0	0	0.214978	0.702787	0	0	0	-0.299849
739	ENSG00000179148.5	<ALOXE3>	0.0175713	0.183947	0.187097	0.172769	0.200936	0.0872769	0.147854	0	0.721046	0.0345848	0.0353853	0	0	0.179902	0	0	0	0	0.228406	0.148586	1.79366	0.401218	-0.0712742
740	ENSG00000163295.4	<ALPI>	0	0	0	0	0	0	0	0	0	0	0	0	0	0	0	0	0	0	0.0702787	0	0	0	-0.242858
741	ENSG00000073331.13	<ALPK1>	65.3475	27.5001	23.9671	61.3329	52.079	34.2125	20.6441	25.7496	28.4166	29.2069	31.0329	36.0909	26.1585	28.4786	13.2265	18.3431	25.2081	29.1475	64.797	17.0131	33.8209	0.0164938	0.348518
742	ENSG00000198796.6	<ALPK2>	0	0	0	0	0.200936	0	0	0	0.0924418	0	0	0	0	0	0	0	0	0.0716594	0	0	0.137974	0	0.138231
743	ENSG00000136383.6	<ALPK3>	0	0.588631	0.187097	1.69313	1.15082	0	0.295708	0.144054	0.758023	0.259386	1.4331	0	2.61044	1.20535	0.319391	0.648301	0	1.75566	0.579799	0.204306	0	-0.473761	-0.281714
744	ENSG00000162551.9	<ALPL>	37.0051	8.02009	9.93486	49.982	18.7601	16.443	27.4823	14.2613	36.533	13.9377	7.90861	3.22334	5.09487	10.4164	32.0894	15.3685	23.4643	5.19531	27.5317	12.7227	8.20945	0.729623	0.557769
745	ENSG00000163283.6	<ALPP>	0	0	0	0	0	0	0	0	0	0	0	0	0	0	0	0	0	0	0	0	0	0	1
746	ENSG00000163286.3	<ALPPL2>	0	0	0	0	0	0	0	0	0	0	0	0	0	0	0	0	0	0	0	0	0	0	1
747	ENSG00000003393.10	<ALS2>	7.15151	9.45488	9.07421	4.31922	4.4754	8.78005	10.9782	7.74289	10.6123	6.46736	5.21933	9.05354	4.59078	6.87227	3.15633	9.11434	5.98928	7.73922	4.12887	3.58464	12.9696	0.433114	0.351469
748	ENSG00000178038.12	<ALS2CL>	25.3378	22.791	14.2942	62.4559	19.1803	42.2246	26.5767	23.2287	28.4721	28.2558	39.3307	37.8523	68.6817	29.2701	20.8168	10.6398	23.5402	37.7287	21.6458	9.21234	38.8742	-0.170202	-0.0651415
749	ENSG00000155754.10	<ALS2CR11>	1.37056	0.735788	0.467743	0.587413	0.748945	1.34406	0.221781	0.720269	0.443721	0.916498	1.04387	1.21536	0.612104	0.539707	0.112726	0.591098	0.625463	1.07489	0.56223	0.0185733	1.00031	0.143052	0.157062
750	ENSG00000155749.8	<ALS2CR12>	2.37212	1.71071	3.77936	1.43398	1.04122	3.17688	1.12739	5.29397	1.46058	1.57361	2.45928	3.82222	3.96067	0.77358	0.169089	1.84956	0.360115	1.684	1.91509	0.11144	0.914078	-0.0279052	0.340655
751	ENSG00000180318.3	<ALX1>	0	0	0	0	0	0	0	0	0	0	0	0	0	0	0	0	0	0	0	0	0	0	1
752	ENSG00000156150.6	<ALX3>	0	0	0	0	0	0	0	0	0	0	0	0	0	0	0	0	0	0	0	0	0	0	1
753	ENSG00000052850.5	<ALX4>	0	0	0	0	0	0	0	0	0	0	0	0	0	0	0	0	0	0	0	0	0	0	1
754	ENSG00000183684.6	<ALYREF>	79.9141	113.882	84.2124	74.2732	121.311	69.1756	126.84	64.5541	133.486	70.1208	88.3039	118.295	102.293	102.544	143.425	64.9063	108.47	66.1238	52.7266	69.2226	109.5	-0.316176	0.0135624
755	ENSG00000242110.3	<AMACR>	6.43108	11.8462	19.6826	2.55698	3.16018	6.21411	12.697	8.17505	18.359	8.54245	12.7033	8.38422	6.06703	9.26498	6.16236	10.9639	12.3197	14.0094	4.81409	9.99242	5.08779	-0.140513	0.10428
756	ENSG00000178522.10	<AMBN>	0	0	0	0	0	0	0	0	0	0	0	0	0	0	0	0	0	0	0	0	0	0	1
757	ENSG00000106927.7	<AMBP>	0	0.165552	0.392904	0	0	0.244375	0.277226	0.252094	0.351279	0.605235	0	0.299436	0.270046	0.0899512	0	0.0953383	0	0.0895743	0.316254	0	0.189714	0.342895	0.457064
758	ENSG00000110497.10	<AMBRA1>	22.1047	27.5737	29.6362	25.7598	24.0576	21.4352	24.9503	27.1181	25.403	22.7914	22.965	29.8203	31.8834	28.5325	27.3925	27.6863	28.487	24.3284	33.3121	14.6915	28.8711	-0.174947	-0.353141
759	ENSG00000123505.10	<AMD1>	59.8829	57.3915	57.3453	126.933	60.4818	90.9425	83.519	52.1655	76.3015	55.4222	40.1446	79.3154	24.5562	61.8684	101.097	59.6818	69.7297	70.5846	64.5861	37.2766	45.7039	-0.0395392	0.394229
760	ENSG00000139344.3	<AMDHD1>	0.983991	1.50837	1.85226	0.691075	0.0913347	4.52094	0	0.648242	2.2186	0.743574	0.866939	1.07445	1.06218	1.15138	0.751508	1.33474	1.83848	1.39736	0.755496	2.50739	1.46597	-0.276055	0.0247734
761	ENSG00000162066.10	<AMDHD2>	39.7813	51.542	54.1833	28.766	31.9123	29.7789	48.3667	42.1537	42.5787	45.5136	41.7546	40.6176	32.7476	49.9409	27.0355	19.449	37.831	49.3017	27.3736	34.6763	31.3374	0.285237	0.447178
762	ENSG00000125363.10	<AMELX>	0	0	0	0	0	0	0	0	0	0	0	0	0	0	0	0	0	0	0	0	0	0	1
763	ENSG00000099721.9	<AMELY>	0	0	0	0	0	0	0	0	0	0	0	0.369892	0	0	0	0	0	0	0	0	0	0	-0.289945
764	ENSG00000184675.5	<AMER1>	1.80984	2.39131	0.67355	1.57219	2.24683	0	1.5155	2.1428	0.776512	1.71195	2.03465	1.79662	0.990169	0.647649	0.695145	1.2394	1.02349	1.37944	1.79211	1.28156	2.62151	0.265869	0.0773673
765	ENSG00000165566.11	<AMER2>	0	0.0367894	0.0935486	0	0	0.104732	0.332671	0.0720269	0	0	0.0176926	0	0.0540092	0	0	0.0381353	0.0379069	0	0.052709	0	0	0.0521229	0.437812
766	ENSG00000178171.6	<AMER3>	0	0.0735788	0.243226	0.0345537	0.0182669	0.349107	0.0554452	0.0900336	0.0924418	0.276679	0.0353853	0.0176139	0.0180031	0.125932	0	0.0190677	0.0379069	0.0179149	0	0.371465	0.0517403	0.164616	0.374438
767	ENSG00000159461.10	<AMFR>	63.9067	82.8682	44.8659	72.3037	54.5816	102.673	102.999	79.5176	86.1558	101.213	55.7141	69.9096	48.8423	91.0666	86.7616	43.112	72.6485	101.828	70.2436	78.9736	76.7136	0.159383	0.24979
768	ENSG00000104899.4	<AMH>	6.90551	5.29768	3.64839	2.50515	3.52552	5.34134	2.90163	1.36851	2.92116	10.9634	1.9108	4.57961	1.96233	9.12105	3.02482	1.58262	2.21755	8.4379	11.8068	2.50739	5.70868	0.213478	-0.0594766
769	ENSG00000135409.6	<AMHR2>	0.491995	0	0	0.293707	0.164402	0	0.166336	0.144054	0.129419	0.276679	0.123848	0	0.504086	0.197893	1.50302	0.133474	0.151627	0.107489	0.474381	0.297172	0	0.00574641	-0.328884
770	ENSG00000160593.13	<AMICA1>	12.7392	14.5134	53.753	14.5471	7.76345	17.595	11.1815	15.9539	13.1083	9.75292	32.0591	18.7412	19.5153	19.8432	18.9756	8.71392	20.6024	31.5122	9.36464	17.7189	13.211	-0.444557	-0.13312
771	ENSG00000181754.6	<AMIGO1>	13.2839	13.7776	13.1903	15.0309	10.54	12.8821	18.9992	15.7019	18.1186	14.3527	18.595	21.3128	5.49093	16.9108	19.7083	11.7457	14.8974	26.4782	12.1582	14.6915	10.4515	-0.0801633	-0.17226
772	ENSG00000139211.5	<AMIGO2>	4.99024	6.14383	15.9781	17.0868	6.53956	7.64545	33.2671	8.75126	7.56174	5.82754	19.5327	24.9061	34.2238	7.05218	16.3829	34.951	11.808	11.0356	5.97369	5.55341	17.6089	-1.05893	-0.424445
773	ENSG00000176020.7	<AMIGO3>	4.60367	0	3.36775	4.6302	3.61685	4.83514	0	0.0900336	0	1.31422	0	0	0	5.1632	0	0	4.1508	0	0	0	7.24364	2.50639	0.215987
774	ENSG00000101935.5	<AMMECR1>	0	0.698999	0.598711	0	0.730678	0.94259	0.813196	0	0.295814	0.605235	0.300775	0.422734	1.72829	0.7376	1.40908	2.65041	0	0.859913	0	0.241453	1.75917	-0.167457	-0.480495
775	ENSG00000144233.5	<AMMECR1L>	0	0	0	0	0	0	0	0	0	0	0	0	0	0	0	0.877113	0	1.02115	0	0	0	0	-0.444145
776	ENSG00000166126.6	<AMN>	0.474424	0.3495	0.598711	0.259153	0.493207	0.279286	0.646861	0.306114	0.776512	0.259386	0.67232	0.334664	0.378064	0.413776	0.601206	0.190677	0.833951	0.376212	1.24745	0.222879	0.517403	-0.00286645	-0.225883
777	ENSG00000151743.6	<AMN1>	11.9133	9.91475	9.46712	7.72276	8.96907	4.03219	3.34519	9.30947	8.00546	7.72971	4.91855	11.9951	11.1439	5.18119	7.66538	11.7075	6.14091	7.34509	6.13182	8.22796	6.60551	0.196092	0.0346349
778	ENSG00000126016.9	<AMOT>	5.32409	4.56189	3.6671	5.97779	6.15596	0.645849	0.831678	4.95185	4.97337	6.48466	3.14929	12.1184	1.65628	1.88898	2.2921	2.45973	2.02802	6.50309	1.40557	0.0742931	1.51771	1.11158	0.295481
779	ENSG00000166025.13	<AMOTL1>	36.4252	33.3312	34.2201	30.4937	41.3564	26.8813	42.9146	27.1001	34.9985	25.2123	31.2452	39.6665	32.9996	30.7633	28.8015	45.8768	32.0502	38.714	38.6182	14.9329	38.9777	0.0330391	-0.0578329
780	ENSG00000114019.10	<AMOTL2>	60.2343	74.3698	69.9182	52.6599	49.6861	91.7454	69.787	108.202	90.3896	51.6525	78.7499	90.5178	99.2509	87.8284	76.6914	101.268	85.5747	94.6621	62.5832	67.0681	157.118	-0.328273	-0.600071
781	ENSG00000116748.15	<AMPD1>	0	0.110368	0.0374194	0	0.164402	0.139643	0.240263	0.144054	0.22186	0.0345848	0.0884632	0.422734	0.0720123	0.539707	0.281815	0	0	0.447872	0	0	0.931325	0.0869171	-0.449518
782	ENSG00000116337.11	<AMPD2>	102.968	78.9869	73.7163	100.396	136.6	93.0197	76.3665	80.2739	64.4689	62.1144	157.058	108.414	59.6442	111.647	107.259	71.4465	78.0881	124.759	137.36	37.8338	93.4429	-0.427386	-0.286691
783	ENSG00000133805.11	<AMPD3>	7.04608	6.47494	11.9368	9.46772	6.53956	6.96469	6.56102	4.89783	5.13977	3.38931	7.94399	6.25293	5.23889	5.00129	3.49451	6.19699	6.80428	8.09752	4.44513	3.82609	2.88021	0.296911	0.461849
784	ENSG00000078053.12	<AMPH>	2.07341	1.41639	1.5342	2.40148	1.75363	14.6625	0	13.6311	0.942907	1.64278	1.18541	2.74777	5.43693	1.52917	0.413329	0.495759	3.22208	0.985317	4.77895	0	4.05299	0.115434	0.305983
785	ENSG00000145020.10	<AMT>	125.635	81.0103	69.5066	69.142	68.8664	166.996	75.1837	108.04	64.0992	105.847	121.885	98.6907	92.5538	61.4907	45.7668	39.165	54.7375	122.609	79.5379	47.2876	124.608	-0.0262095	0.270349
786	ENSG00000187689.5	<AMTN>	0	0	0	0	0	0	0	0	0	0	0	0	0	0	0	0	0	0	0	0	0	0	1
787	ENSG00000237763.5	<AMY1A>	0	0	0	0	0	0.279286	0.0554452	0	0	0	0	0	0.558095	0	0	0	0	0	0	0	0	0	-0.0851703
788	ENSG00000174876.12	<AMY1B>	0	0.367894	0.149678	0	0.255737	0.279286	0.184817	0	0	0.172924	0.0707705	0.211367	0.828141	0.197893	0.131514	0	0	0.268723	0	0.0371465	0.189714	0.0664926	-0.123676
789	ENSG00000187733.6	<AMY1C>	0	0	0	0	0	0	0	0	0	0	0	0	0	0	0	0	0	0	0	0	0	0	1
790	ENSG00000243480.3	<AMY2A>	0.562281	2.39131	0	1.77952	0	0	1.82969	0.666248	0.721046	0	0	0	0	0	0.864234	0.457624	0	0	0	1.89447	0.707117	1.15609	0.406875
791	ENSG00000240038.2	<AMY2B>	36.9348	39.5118	35.1368	30.3727	41.1371	68.7916	30.0513	44.3685	28.0099	29.8986	26.2736	35.6153	57.2497	63.7574	13.9029	24.0825	15.2006	25.26	34.4014	26.1883	47.2734	0.448503	0.240073
792	ENSG00000174945.9	<AMZ1>	0.773136	1.85787	0.65484	0	0.803745	0	2.86467	0.252094	0.573139	0.311264	0.194619	0.95115	0.70212	0.593678	0.939385	0.114406	0.265348	0.0895743	0.245975	0.204306	0.74161	0.541548	0.366594
793	ENSG00000196704.7	<AMZ2>	138.444	101.465	118.975	113.768	112.89	146.014	120.482	109.247	127.496	154.093	102.44	93.7764	91.6356	101.429	102.28	134.046	79.9456	102.831	72.0005	165.544	105.084	0.22622	0.639192
794	ENSG00000153107.7	<ANAPC1>	12.212	11.0184	12.1239	7.77459	16.1297	10.6652	6.72735	9.95771	10.2426	14.1279	10.5802	6.56998	12.4041	13.8345	6.53812	6.29233	5.55335	13.4541	12.2988	4.42044	9.86514	0.129914	0.415011
795	ENSG00000164162.8	<ANAPC10>	19.9258	24.9248	30.2162	25.587	14.8876	24.4375	23.786	16.008	30.6167	22.4456	17.7811	23.4969	28.3728	17.6484	35.3396	26.5041	29.6053	32.9813	20.0646	38.1866	25.4907	-0.133828	-0.413343
796	ENSG00000141552.13	<ANAPC11>	188.838	242.994	187.621	197.941	201.247	96.4409	213.963	204.61	267.49	194.505	231.933	157.38	141.774	193.395	316.084	175.308	210.743	190.937	161.764	380.288	168.57	0.063811	-0.140851
797	ENSG00000129055.8	<ANAPC13>	17.2901	21.6138	17.5497	17.3978	26.5784	23.0935	24.5068	19.3572	21.8533	16.4451	17.6042	21.0838	17.1209	25.3483	19.0507	23.8537	17.513	22.2503	17.8508	16.7159	14.6425	0.19355	0.249802
798	ENSG00000110200.4	<ANAPC15>	39.8516	53.6022	35.4923	25.1551	42.2332	59.1039	52.599	48.9422	51.3607	45.1332	42.3562	19.9565	31.8114	37.1858	32.033	35.5612	43.0622	47.3311	30.0793	61.1432	46.6697	0.335051	0.43829
799	ENSG00000166295.4	<ANAPC16>	229.112	227.653	231.533	326.481	227.332	158.53	208.936	205.691	229.7	207.474	166.594	192.203	245.256	184.508	235.109	267.615	200.641	227.304	138.098	342.863	119.348	0.180779	0.190506
800	ENSG00000176248.7	<ANAPC2>	92.4249	80.8999	56.784	69.2457	62.0528	97.2963	74.6847	84.3615	59.8284	95.9729	87.1008	95.2736	72.9304	111.593	55.837	32.1862	49.0515	73.4868	119.368	42.087	143.51	0.0816037	-0.0751617
801	ENSG00000053900.6	<ANAPC4>	60.2519	38.2242	40.282	65.6348	50.6725	80.5566	31.3635	47.1236	39.8979	60.2641	48.354	55.977	44.7736	62.1743	19.6519	31.7286	32.0123	53.6192	50.5128	23.9224	70.9531	0.0159777	0.29506
802	ENSG00000089053.8	<ANAPC5>	224.947	191.213	195.404	235.086	255.153	305.748	219.009	212.335	206.626	255.789	256.915	238.615	219.961	305.762	251.229	199.696	190.141	232.284	221.413	243.551	224.035	-0.0653299	-0.102011
803	ENSG00000196510.8	<ANAPC7>	102.071	98.5221	65.1659	103.73	120.251	107.735	120.094	100.225	96.0656	125.024	104.723	113.293	76.369	150.956	83.0604	56.6691	84.4375	94.5367	166.754	105.385	105.947	-0.0251975	0.00164931
804	ENSG00000214274.5	<ANG>	31.3999	34.8948	32.031	10.4352	12.6773	53.2389	20.3114	47.5017	26.8451	28.9129	15.9057	35.8619	49.4004	24.2149	31.5257	27.7816	22.0997	34.4682	20.5741	22.1208	26.4048	0.188325	0.0978828
805	ENSG00000013523.5	<ANGEL1>	29.4143	15.1388	21.1233	15.3419	23.5278	17.8568	7.98411	24.7052	12.2763	40.274	27.7597	33.3431	17.9671	26.9674	18.3744	13.9003	15.7503	26.5319	37.687	1.26298	15.2979	0.0828549	-0.0420549
806	ENSG00000174606.8	<ANGEL2>	50.9567	35.1339	63.7253	56.1498	36.1503	65.3704	21.0322	48.5101	50.3993	40.3259	40.4984	45.1796	54.3693	55.7518	23.7852	46.9065	26.6296	51.4336	41.8861	14.2271	67.4521	0.129069	0.202367
807	ENSG00000154188.5	<ANGPT1>	8.55721	14.1823	15.4916	5.71864	8.18359	21.1035	2.77226	20.6357	14.347	4.40957	21.2489	25.5049	29.561	10.9201	8.92415	28.735	16.2052	29.5774	11.9474	12.797	30.475	-0.873648	-0.83382
808	ENSG00000091879.9	<ANGPT2>	5.27138	3.69734	5.72517	10.4007	12.8782	2.16447	6.33924	2.71901	3.14302	4.53061	9.8371	11.7309	21.9097	8.16757	3.38178	12.6991	16.6032	7.02263	22.3486	0.352892	5.20852	-0.936535	-0.648269
809	ENSG00000101280.6	<ANGPT4>	0.210855	0.257526	0	0	0.968148	0.401474	0	0	0.480698	0	0	1.37388	5.20289	0	0	1.52541	0.0189534	0.501616	0	0.352892	0.137974	-0.0755432	-0.375487
810	ENSG00000116194.8	<ANGPTL1>	7.23936	31.271	28.1955	12.1456	31.4191	29.4821	13.695	44.2605	36.0708	14.8369	26.4328	39.8426	70.5	27.669	3.94541	102.718	36.1252	12.9704	18.2022	29.03	57.6731	-0.00937105	-0.44496
811	ENSG00000136859.5	<ANGPTL2>	29.2562	46.9433	74.4647	16.102	34.8533	48.5609	30.6982	90.9159	28.5645	21.6155	110.579	65.7879	56.0615	21.9121	38.5336	69.3682	69.8623	85.8122	78.6595	18.759	100.531	-1.07016	-0.601496
812	ENSG00000132855.4	<ANGPTL3>	0.210855	0.220737	0.561291	0.60469	0.748945	0	0.11089	0.252094	0.610116	0.778159	0.123848	0.281822	0	0.377795	0	0.476692	0.341162	0	0.790636	0	0.500156	0.213773	0.382823
813	ENSG00000167772.7	<ANGPTL4>	1.75713	7.87294	7.67098	12.353	13.6819	2.86268	2.69833	28.8468	9.72488	5.65462	5.60857	3.39948	18.8672	9.80468	18.2241	34.3027	15.4091	3.90544	46.0677	8.35797	43.5481	-0.943554	-0.545436
814	ENSG00000187151.3	<ANGPTL5>	0	1.80268	0	0	0	0	0.53597	7.5088	0	0.311264	2.6539	2.6597	2.14236	0	0.375754	4.61438	0.66337	2.31102	3.16254	1.13297	2.70774	-2.49109	-0.375314
815	ENSG00000130812.6	<ANGPTL6>	0.0351425	0.993314	0.430323	0.812013	0.621076	0	1.55247	0.882329	1.09081	0.881913	1.09694	1.35627	0.810138	0.70162	1.0709	0.438556	0.682323	0.537446	0.614939	1.82018	0	0.16473	-0.144608
816	ENSG00000171819.4	<ANGPTL7>	50.9742	149.071	74.9698	15.2382	32.3873	51.8774	44.3747	132.691	46.3688	15.4075	12.2079	73.6789	28.1928	104.937	21.5307	33.5782	63.2286	35.3102	56.2932	36.1993	74.2128	0.422071	0.230059
817	ENSG00000227059.2	<ANHX>	0	0	0	0	0	0	0	0	0	0	0	0	0	0	0	0	0	0	0	0	0	0	1
818	ENSG00000029534.15	<ANK1>	2.67083	2.17058	2.6942	2.40148	1.31522	3.00232	1.53398	1.42253	1.9043	1.26235	3.3616	3.69892	4.17671	1.45721	2.47998	1.79236	3.24104	1.61234	1.12446	2.69312	2.03512	-0.231927	-0.40054
819	ENSG00000145362.12	<ANK2>	41.9426	32.3379	28.5884	36.2123	29.2636	58.301	30.3285	42.928	36.0708	43.2483	64.2596	59.852	35.25	24.035	36.1663	32.415	41.7734	51.5411	49.16	25.6497	59.2598	-0.206268	-0.337148
820	ENSG00000151150.16	<ANK3>	174.026	93.7762	154.411	135.762	107.318	118.662	53.6155	64.0139	78.4646	136.472	64.8612	189.12	7.74132	87.7744	62.2624	48.5272	42.8916	121.839	72.0708	40.6383	93.4084	0.796058	0.577766
821	ENSG00000151687.10	<ANKAR>	16.9738	13.5385	15.9407	18.9182	19.8196	28.0159	9.07453	17.7366	12.8124	23.2064	18.6834	21.7708	16.3648	17.4505	6.35024	18.6863	14.7268	19.3122	9.66332	12.8341	17.402	-0.00377212	0.262833
822	ENSG00000166839.12	<ANKDD1A>	26.392	21.2827	22.4329	23.8421	21.4089	40.6012	39.6064	32.9343	21.2246	26.2326	28.2551	37.4119	30.2632	37.4917	22.9773	17.7711	24.9238	46.2203	43.6079	20.2449	55.2414	-0.268595	-0.393811
823	ENSG00000189045.9	<ANKDD1B>	3.61968	1.87626	2.05807	3.64542	0.712411	0.698215	2.19933	2.30486	3.54977	2.87054	4.83009	4.50916	0.594101	2.84246	1.46544	3.73726	3.0515	7.81088	1.388	0.91009	7.26088	-0.3679	-0.423678
824	ENSG00000132623.11	<ANKEF1>	0	0	0.149678	0.224599	0.0913347	0.733126	0	0.270101	0.277326	0	0.300775	0.228981	0.936159	0.215883	0	0.57203	0.682323	0.179149	0.685217	0.315746	0	-0.367951	-0.522897
825	ENSG00000153930.6	<ANKFN1>	0.755564	0.31271	0.243226	0.172769	0.876813	0	0.480525	0.324121	0.573139	0.743574	0.813861	1.3915	2.10636	0.341815	0.356966	0.514827	0.66337	0.555361	0.825775	1.09582	1.63844	-0.542097	-0.767242
826	ENSG00000185722.12	<ANKFY1>	15.4276	8.42478	13.34	18.037	10.6131	13.8421	3.77027	12.2626	11.9435	13.2806	14.2603	19.9918	11.612	12.881	6.21873	2.97456	7.67614	14.3856	20.9958	2.19165	23.0762	-0.0118479	-0.0359927
827	ENSG00000154122.8	<ANKH>	62.0266	55.0554	57.944	81.7023	49.4121	48.1768	75.2761	49.6805	38.918	61.0077	67.462	76.5676	14.7085	44.5259	61.4921	57.1458	54.7375	91.1866	70.4895	38.7996	55.5863	-0.0162616	0.0167076
828	ENSG00000131503.16	<ANKHD1>	176.872	157.477	160.642	151.363	163.38	274.049	147.152	183.885	185.494	159.609	143.558	168.6	210.204	214.893	106.413	156.87	138.777	148.944	190.561	85.3813	178.228	0.0463758	0.322725
829	ENSG00000254996.1	<ANKHD1-EIF4EBP3>	3.12769	3.23747	3.61098	3.2826	4.09179	5.98719	4.21384	3.13317	3.47581	3.30285	9.87249	3.91029	6.24706	4.53354	1.84119	3.92794	7.4487	3.02761	5.09521	3.1946	5.44997	-0.372051	-0.499407
830	ENSG00000001629.5	<ANKIB1>	7.60836	7.10036	10.6832	5.44221	10.741	16.8619	4.54651	8.53518	8.67105	7.22823	3.76853	14.232	13.1422	13.2228	4.26481	2.86015	2.82406	5.3028	10.8756	1.96877	16.6776	0.562844	0.0980023
831	ENSG00000170209.4	<ANKK1>	0	0	0.336775	0	0	0	0	0.972363	0	2.43823	0.849246	1.09206	0	2.17682	0	0	0	0	0	0.0371465	0.517403	0	-0.0463923
832	ENSG00000160117.10	<ANKLE1>	2.33698	0.846157	1.10387	0.898397	0.146136	0.22692	0.628379	1.13442	1.71942	0	1.55695	1.93753	0.396067	1.56515	0.526055	0.343218	0.890811	1.37944	5.00736	0	0.603636	-0.0193549	-0.248057
833	ENSG00000176915.10	<ANKLE2>	123.438	92.2495	106.72	86.5571	103.427	107.822	108.543	109.445	103.073	89.2635	75.2645	107.586	125.085	142.105	74.8126	97.9125	82.2389	86.6542	129.207	63.1306	162.119	0.101339	-0.0338293
834	ENSG00000144504.11	<ANKMY1>	27.4639	27.3529	20.9736	34.3464	27.0899	15.9891	19.6091	24.5612	20.5591	26.5093	21.2842	37.7642	27.8147	26.8954	24.4616	17.4851	28.5818	33.3037	43.7661	14.19	24.8698	-0.07347	-0.284448
835	ENSG00000106524.4	<ANKMY2>	0.720422	0.367894	2.75033	3.38627	0.767211	0	0.720788	0.306114	1.70093	2.45552	2.26466	1.53241	2.25038	1.20535	2.32967	1.08686	1.70581	0.913658	0.755496	0	0	-0.455079	0.0289443
836	ENSG00000164331.5	<ANKRA2>	76.2417	41.057	57.4014	71.2325	53.9423	55.2288	34.2097	59.7643	43.9838	58.2063	49.3271	59.0946	75.7749	81.154	28.5009	46.9255	25.5113	45.1813	54.8877	27.5627	46.48	0.260611	0.26798
837	ENSG00000148677.6	<ANKRD1>	0	0	0	0	0	0	0	0	0	0	0	0	0	0	0	0	0	0	0	0	0	0	1
838	ENSG00000088448.10	<ANKRD10>	352.796	197.688	230.653	280.438	294.481	315.104	217.974	244.657	154.101	369.28	264.098	380.319	208.962	269.386	148.799	149.605	119.369	249.626	287.159	122.435	395.934	0.0726709	0.250506
839	ENSG00000167522.10	<ANKRD11>	105.023	101.336	88.3847	105.648	97.582	69.7342	96.7334	107.824	104.441	84.5772	85.9154	102.478	81.5359	102.346	88.9597	70.9317	99.5623	107.561	132.844	49.9064	134.145	-0.00148754	0.00408362
840	ENSG00000101745.11	<ANKRD12>	29.3792	19.0385	31.8626	28.7833	25.9391	52.1043	10.165	21.6441	31.2084	20.284	20.0458	28.1294	28.1748	24.9525	8.60476	21.6227	18.4796	20.9783	26.7938	8.02365	23.3521	0.332725	0.474668
841	ENSG00000076513.12	<ANKRD13A>	49.8848	35.7777	39.8143	44.056	44.8453	63.2059	35.7437	46.4393	35.738	49.2661	47.6817	50.64	33.6117	48.4657	21.6058	36.5527	35.5566	53.8879	38.2843	30.7388	43.1514	0.212869	0.344601
842	ENSG00000198720.8	<ANKRD13B>	40.9762	43.9266	21.7968	66.4468	34.8716	55.8572	19.3319	32.4301	33.8152	61.855	51.9279	32.9028	13.4663	50.5346	27.1858	13.2711	24.3172	40.398	38.0032	57.5214	37.6669	0.00968124	0.271752
843	ENSG00000118454.8	<ANKRD13C>	27.376	29.1188	25.9878	19.9029	21.4089	37.4592	32.2691	24.6152	29.7108	22.6012	16.7726	26.8612	32.2255	30.3675	22.7707	29.307	28.468	27.6605	25.5463	23.2537	28.3364	-0.0510282	0.0787364
844	ENSG00000172932.10	<ANKRD13D>	133.366	127.623	97.9828	162.247	136.052	118.522	135.748	115.387	134.706	115.859	151.219	125.147	108.342	161.301	119.602	63.4	128.637	158.152	154.719	115.489	81.146	0.0601298	0.0957864
845	ENSG00000134461.11	<ANKRD16>	13.7056	13.2074	11.862	11.0054	13.2801	12.5679	11.2369	14.3514	16.3067	12.4851	13.5526	14.9894	11.2699	13.8885	9.01809	10.5826	11.9596	16.6071	15.3032	10.531	9.46847	0.103642	0.177897
846	ENSG00000132466.13	<ANKRD17>	51.3081	47.7159	39.4588	65.8767	72.5015	82.1624	36.908	51.3191	49.4009	71.5906	41.8608	54.1627	48.0682	55.5179	37.1621	50.7772	49.3547	56.1273	65.4646	25.0739	43.2031	0.0556012	0.477994
847	ENSG00000180071.14	<ANKRD18A>	0.931277	1.60034	0.299355	3.83546	6.33863	1.93755	1.77425	4.73577	0.166395	2.10967	1.96388	1.02161	0.162028	0.431766	0.807871	3.20337	0.530696	3.15302	3.44366	0.427185	0.379429	0.849056	0.405045
848	ENSG00000230453.5	<ANKRD18B>	0.368997	0.367894	0.916776	0	0	0	0	0	0	0	0	0	0.558095	0	0.469692	0	0	0.340382	0.56223	0	0	0	-0.023065
849	ENSG00000165887.7	<ANKRD2>	0.0878563	0.588631	0.841937	0.397368	0.0913347	2.7754	1.47854	1.76466	2.66233	0.605235	1.18541	5.33701	0.162028	3.54408	0.789083	1.54448	1.64895	0.66285	0.737926	3.77037	0.914078	-0.461981	-0.372849
850	ENSG00000196774.3	<ANKRD20A1>	0	0	0	0	0	0	0	0	0	0	0	0	0	0	0	0	0	0	0	0	0	0	1
851	ENSG00000183148.5	<ANKRD20A2>	0	0	0	0	0	0	0	0	0	0	0	0	0	0	0	0	0	0	0	0	0	0	1
852	ENSG00000132498.7	<ANKRD20A3>	4.77938	3.43981	2.95614	3.2826	0.365339	0	0.776233	2.98911	0.924418	0.553357	1.2031	3.89267	2.12436	3.58006	0.394541	0.991519	0.416975	1.2003	1.5637	1.48586	2.48353	0.29728	0.123262
853	ENSG00000172014.11	<ANKRD20A4>	2.14369	0.202342	0.205807	0.207322	0.109602	0	0	0	0.702558	0	0	0	0.108018	0.251863	0.338178	0	0.0758137	0	0.298685	0	3.7253	0.188032	-0.0607765
854	ENSG00000152766.5	<ANKRD22>	0	0	0.467743	0	0.0182669	0	0	0.252094	0	0	0	0	0	0	0	0.362286	0	0.304553	0.316254	0	0	0	-0.0655069
855	ENSG00000163126.10	<ANKRD23>	23.2995	23.3797	11.3194	31.202	12.5677	19.2184	13.8613	21.7701	25.7173	34.7578	19.6919	22.1054	9.55963	18.404	10.4647	6.76902	12.8883	19.2047	22.7879	10.4753	31.0787	0.285123	0.472739
856	ENSG00000089847.8	<ANKRD24>	14.8653	5.72075	3.49872	7.42905	4.82247	8.39604	3.27127	7.67086	4.32628	12.3468	7.32475	9.7581	1.60227	3.92187	3.92663	4.19489	1.55418	9.62028	5.34118	4.42044	6.45029	0.523923	0.412192
857	ENSG00000107890.12	<ANKRD26>	7.18665	5.33447	4.52775	9.45044	7.74518	7.45344	1.3122	4.89783	5.15826	8.00639	5.85626	8.84218	4.59078	6.76433	1.74726	3.90887	3.46848	5.55361	4.39242	0.761504	5.19127	0.409255	0.453031
858	ENSG00000105186.10	<ANKRD27>	3.51425	3.86289	5.05162	8.48294	6.92317	9.05934	3.60394	5.366	1.38663	3.92538	4.51162	4.45632	5.23889	9.80468	5.76782	3.45125	6.50103	7.02263	3.75991	2.04306	2.75948	-0.00667116	0.0275762
859	ENSG00000206560.6	<ANKRD28>	44.0687	43.2828	45.184	51.5887	58.2715	75.9483	27.6856	62.2672	46.7016	29.3106	31.4575	54.0394	41.083	34.4693	22.5828	32.7773	28.7144	25.9586	48.3693	8.35797	53.0683	0.480916	0.687816
860	ENSG00000154065.12	<ANKRD29>	18.3093	28.1439	20.2626	28.8696	21.6829	30.9135	32.7866	19.9514	40.6005	25.5582	28.6267	56.4702	86.0907	19.1236	16.5332	17.6567	29.3778	38.2124	26.3897	19.0748	43.6688	-0.0907452	-0.357698
861	ENSG00000148513.13	<ANKRD30A>	0	0	0	0.483752	0	0	0	0.0180067	0	0	0	0	0.0180031	0	0	0.0190677	0	0	0	0	0	0	0.31117
862	ENSG00000180777.9	<ANKRD30B>	10.4549	2.40971	2.48839	13.2686	2.19203	11.1889	3.99206	9.23744	5.65744	17.621	13.1456	12.1184	0.288049	5.39707	3.90784	2.26905	3.08941	10.6056	15.4613	0.705784	23.3176	0.430492	-0.0395726
863	ENSG00000163046.11	<ANKRD30BL>	0	0	0.130968	0	0	0	0	0	0.0924418	0	0	0	0	0	0	0.0953383	0	0	0	0	0.120727	0	0.0559243
864	ENSG00000145700.5	<ANKRD31>	0	0.0735788	0.149678	0	0.0730678	0	0.0184817	0.432161	0.11093	0.311264	0.0353853	0.6341	0.0720123	0	0.206665	0.381353	0.227441	0	0	0.148586	0	0.00330285	-0.14851
865	ENSG00000133302.8	<ANKRD32>	4.77938	3.88128	6.04324	6.61704	6.4117	5.77773	3.67787	4.23158	8.20884	5.81025	6.2455	6.23532	5.23889	7.30404	3.38178	5.26268	5.55335	6.37769	3.35581	4.40187	6.26057	0.0562404	0.0659318
866	ENSG00000167612.8	<ANKRD33>	0.632566	0.459868	0.729679	0.742905	0.182669	1.08223	0.0924087	0.540201	0	0.985668	1.07925	0.792625	0.360061	0.683629	0.638781	0	0.341162	1.75566	1.01904	0.278599	0.431169	-0.0679574	-0.205709
867	ENSG00000164236.7	<ANKRD33B>	0.509567	0.183947	0	0	0.401873	0	0.499007	0.468175	0	0	0.159234	0.193753	0.216037	0	0	0	0	0.483701	0.316254	0.352892	0.58639	-0.228889	-0.00822871
868	ENSG00000181039.7	<ANKRD34A>	0	0	0	0	0	0	0	0	0	0	0	0	0	0	0	0	0	0	0	0	0	0	1
869	ENSG00000189127.3	<ANKRD34B>	0	0	0	0	0	0	0	0	0	0	0	0	0	0	0	0	0	0	0	0	0	0	1
870	ENSG00000235711.3	<ANKRD34C>	0	0.0183947	0	0	0	0	0	0	0.11093	0	0	0	0.180031	0	0	0	0.132674	0.0358297	0	0	0.206961	0	-0.408711
871	ENSG00000198483.8	<ANKRD35>	0	0	0	0	0	0	0	0	0	0	0	0	0	0	0	0	0	0	0	0	0	0	1
872	ENSG00000135976.12	<ANKRD36>	78.7896	38.0954	33.4156	49.4637	55.7324	79.6314	48.1634	46.5834	42.7636	59.2092	46.9739	51.1508	36.5282	52.3876	25.7203	26.4659	23.4833	47.4027	45.0487	27.2656	45.3762	0.114575	0.742194
873	ENSG00000174501.10	<ANKRD36C>	15.1991	10.6137	7.78324	11.3855	15.5817	22.9015	6.33924	13.2709	10.4274	14.1106	13.6056	19.6395	11.3779	11.4958	5.07268	8.3135	8.43427	14.0094	11.2446	3.04602	13.7457	0.111035	0.283033
874	ENSG00000186352.4	<ANKRD37>	28.36	26.1205	27.653	67.3798	39.621	60.6574	26.0593	28.9908	29.6738	35.3111	44.1254	42.2029	27.7607	31.7708	44.8838	20.6121	45.2229	39.8068	52.6915	30.1073	17.6089	-0.434148	0.048788
875	ENSG00000213337.4	<ANKRD39>	11.0172	7.54183	3.76065	14.1325	5.90022	6.47594	4.63892	7.32873	8.56012	14.7158	9.3594	7.345	4.64479	9.33694	5.61752	3.1271	4.90894	7.25552	9.92687	4.27185	7.72655	0.0330582	0.390703
876	ENSG00000154945.6	<ANKRD40>	10.2792	2.29934	4.6213	5.14851	4.85901	8.2913	0.31419	4.05151	4.78849	4.47874	5.16625	6.05918	7.09321	3.92187	1.44665	2.21185	1.44046	4.19208	8.31046	0.445759	3.65631	0.235211	0.245799
877	ENSG00000137494.9	<ANKRD42>	7.04608	14.7893	10.0097	12.4739	8.91427	17.403	11.163	11.0921	11.4443	12.0874	9.50094	7.55636	10.1357	19.3395	6.14357	12.3558	10.0074	10.9281	11.6663	13.6885	9.70992	0.150313	0.14163
878	ENSG00000065413.12	<ANKRD44>	9.48848	18.4683	22.2271	11.9038	8.93253	9.56555	10.2019	26.6679	17.2127	13.0904	20.3819	18.3889	10.0457	13.9065	8.32295	13.1567	9.79892	32.2467	9.03081	5.64628	14.3148	-0.0714226	0.0688992
879	ENSG00000183831.6	<ANKRD45>	0.0878563	0	0.0561291	0	0	0	0	0.0720269	0	0.155632	0.106156	0.211367	0.0720123	0	0	0	0	0	0.0878484	0.0371465	0	0	-0.0979308
880	ENSG00000186106.7	<ANKRD46>	3.90082	3.32944	4.26582	8.25834	7.58078	3.0896	3.30823	3.90746	6.8407	3.97726	3.27314	2.34265	6.08504	3.29221	6.63205	5.70123	2.53976	2.18561	5.11278	1.67159	2.44904	0.235561	0.415502
881	ENSG00000168876.4	<ANKRD49>	21.5248	17.5118	19.6078	32.1522	19.4543	40.5139	13.196	18.3128	16.8614	18.1743	13.4287	11.9422	24.2321	28.6225	11.8926	16.0359	14.9732	22.6981	22.7352	12.6113	21.6274	0.229231	0.343754
882	ENSG00000151458.7	<ANKRD50>	0.474424	0	0.130968	0.362814	0	0	0	0.16206	0	0	0	0.669328	0.216037	0.251863	0	0	0	0	0.228406	0	0	0	-0.0369885
883	ENSG00000139645.9	<ANKRD52>	5.79852	5.70236	0	4.11189	2.4843	0	1.70032	1.54858	0	1.08942	2.54774	0.898309	0.954162	0.971473	1.6721	0	1.9522	2.81263	0	0	3.06992	0.529827	0.354179
884	ENSG00000144031.7	<ANKRD53>	1.45842	5.13212	4.78969	5.97779	2.08243	0	2.62441	3.2052	4.97337	2.71491	2.24696	4.12165	10.7298	2.62658	3.41936	10.9448	3.48743	4.17416	4.98979	2.50739	3.81153	-0.317407	-0.422365
885	ENSG00000100124.8	<ANKRD54>	14.3733	20.0318	13.8078	15.5492	17.8285	28.3475	15.7095	18.745	22.7962	19.0562	18.7542	18.4946	11.1799	35.2789	12.3623	13.7669	21.7017	20.9962	20.7322	19.2791	22.5243	-0.0742573	-0.118138
886	ENSG00000164512.13	<ANKRD55>	0	0.275921	0.898066	0.241876	0	0	0.184817	0.522195	0.295814	0	0.0707705	0.105683	0.576098	0.0899512	0.0375754	0.457624	0.208488	0.232893	0.175697	0.222879	0	0.0782275	0.132126
887	ENSG00000135299.12	<ANKRD6>	37.0402	23.8212	21.2542	41.4817	20.3494	29.3949	19.7939	31.8719	24.6265	23.3102	32.9083	44.6688	20.9556	25.726	17.961	13.252	18.1763	35.9193	20.8201	17.9232	23.8868	0.20455	0.212448
888	ENSG00000124227.4	<ANKRD60>	0	0	0	0	0	0	0	0	0	0	0	0	0	0	0	0	0	0	0	0	0	0	1
889	ENSG00000157999.5	<ANKRD61>	0	0	0	0	0	0	0	0	0	0	0	0	0	0	0	0	0	0	0	0	0	0	1
890	ENSG00000181626.10	<ANKRD62>	0	0	0	0	0	0	0.0369635	0	0	0	0	0	0.0720123	0.0359805	0	0	0	0	0	0	0	0	-0.189317
891	ENSG00000230778.1	<ANKRD63>	0	0	0	0	0	0	0	0	0	0	0	0	0	0	0	0	0	0	0	0	0	0	1
892	ENSG00000235098.4	<ANKRD65>	58.688	61.144	30.9085	30.0963	40.8997	44.2145	53.7079	32.7182	31.3008	41.156	33.6337	49.0547	8.17339	40.1902	25.2131	26.7519	38.2101	44.196	49.4411	57.4286	46.5662	0.0293965	0.241203
893	ENSG00000230062.4	<ANKRD66>	0	0	0.261936	0	0	0	0	0	0	0	0	0	0	0	0	0.114406	0	0	0	0	0	0	0.185094
894	ENSG00000106013.8	<ANKRD7>	0.632566	0.680604	0.63613	1.72769	1.31522	0	0.388117	0.558208	1.03535	0.449603	1.25618	1.23297	2.30439	0	1.76604	0	0.151627	0.143319	0	1.48586	0.413922	0.31172	-0.0539878
895	ENSG00000156381.4	<ANKRD9>	31.3296	15.7459	14.3316	18.0889	10.8323	8.20403	26.9833	14.6755	17.8967	16.8428	28.6621	14.9366	14.3484	11.5857	24.8373	10.144	16.3568	28.0009	25.4936	15.1186	23.1279	-0.00535584	-0.188934
896	ENSG00000064999.12	<ANKS1A>	0.42171	1.43479	0.879357	1.62403	0.274004	0	1.3122	2.21483	1.51605	1.85029	1.78696	4.01597	1.29622	1.13339	0.338178	0.343218	1.25093	1.88106	1.24745	0	3.67356	0.0976142	-0.262994
897	ENSG00000185046.14	<ANKS1B>	5.13081	7.92812	6.52969	10.7117	3.87259	19.8817	3.49305	7.5088	10.1501	6.3809	7.11244	12.365	3.5466	3.41815	4.95995	10.2012	5.28801	11.161	3.10983	7.81935	5.24301	0.377521	0.244834
898	ENSG00000168096.10	<ANKS3>	71.2866	64.6942	46.4749	75.379	62.1989	60.7796	63.3739	71.9728	63.6	82.1044	79.1215	67.972	45.7818	75.7209	64.5921	43.0739	65.9011	76.1023	91.6962	49.6092	59.691	-0.0386208	0.0446089
899	ENSG00000175311.5	<ANKS4B>	0	0	0	0	0	0	0	0	0	0	0	0	0	0	0	0	0	0	0	0	0	0	1
900	ENSG00000165138.12	<ANKS6>	18.0633	21.3563	24.0981	26.0708	23.1442	18.9216	23.5088	29.441	23.9794	25.0567	17.9049	25.6106	18.0751	27.1293	16.4956	21.4702	15.7882	24.3284	32.2755	24.2381	27.3534	-0.0291027	0.0924094
901	ENSG00000206199.5	<ANKUB1>	1.82741	1.45318	2.45097	3.87002	0.602809	5.0446	1.05346	1.15243	1.59	2.43823	1.00848	1.779	0.162028	0.989463	1.44665	1.02965	1.85744	1.684	0.386533	1.72731	0	0.529996	0.68713
902	ENSG00000163516.9	<ANKZF1>	206.726	154.828	151.792	210.398	138.646	271.326	102.278	183.777	137.295	166.025	149.945	161.731	144.709	197.731	64.3291	65.4593	87.5838	136.816	160.517	89.9318	159.808	0.148274	0.66234
903	ENSG00000011426.6	<ANLN>	1.17727	1.14047	0.205807	0.673798	1.29695	2.68813	1.12739	0.972363	4.03046	0.881913	0.866939	1.02161	1.7463	1.1154	0.206665	4.25209	0.492789	1.43319	0.316254	2.04306	1.63844	0.0164583	0.0282455
904	ENSG00000131620.13	<ANO1>	7.36236	11.9566	7.55873	16.2921	8.69506	10.3161	8.92668	11.1642	11.3334	13.1249	17.6572	38.2045	43.5314	11.8916	7.79689	16.0359	20.5834	12.4329	22.8406	2.48882	29.0263	-0.691885	-0.743725
905	ENSG00000160746.8	<ANO10>	43.1023	51.9467	35.4549	46.5439	52.0973	37.7036	42.4156	51.2831	64.1362	52.2231	39.2776	57.8793	40.4889	37.5097	43.5123	80.8278	54.0931	59.2086	36.4571	61.2175	34.2865	0.166999	-0.10979
906	ENSG00000047617.10	<ANO2>	0.737993	0.790973	1.72129	4.04279	1.68056	5.34134	1.58943	2.52094	3.58674	4.1156	1.27387	3.43471	11.63	6.04472	1.25878	0.591098	6.42521	3.08136	1.51099	1.74589	4.07023	-0.450324	-0.308972
907	ENSG00000134343.8	<ANO3>	0	0.110368	0	0	0	0	0	0	0	0	0.0176926	0	0	0	0	0.32415	0	0	0	0	0.120727	0	-0.280106
908	ENSG00000151572.12	<ANO4>	2.63569	2.4465	1.88968	2.33238	1.53442	2.86268	2.82771	0.864322	2.16314	2.36906	2.61851	2.43072	0.450077	1.40324	7.75932	1.1822	1.28883	2.50808	1.54613	1.41157	1.94888	0.478427	-0.0186111
909	ENSG00000171714.10	<ANO5>	0	0	0	0	0.109602	0	0	0	0	0	0.212312	0	0.324055	0	0	0	0	0.358297	0	0	0	0	-0.466999
910	ENSG00000177119.11	<ANO6>	0.843421	0.993314	1.17871	0.812013	2.1555	0.523661	0.369635	0.738275	2.10767	4.3231	1.59234	8.20808	4.46476	1.04343	1.85998	4.84319	0.833951	1.12864	2.03808	12.3327	3.32862	-0.839508	-0.629048
911	ENSG00000146205.9	<ANO7>	2.40726	1.398	2.65678	2.62608	1.55269	1.4488	1.5155	1.44054	1.7564	2.54199	1.73388	4.22734	1.63828	2.0329	1.01454	0.57203	3.20313	1.34361	2.53003	1.3187	1.31075	0.0109315	0.027782
912	ENSG00000074855.6	<ANO8>	15.0586	7.02678	2.56323	23.7384	7.23371	2.05973	2.47655	9.02136	6.69279	13.2287	13.8887	8.91263	3.78064	5.75688	7.34599	1.43007	5.13638	11.4297	11.1919	0.464332	6.01912	0.227053	0.257372
913	ENSG00000185101.8	<ANO9>	3.11011	2.06021	2.63807	6.78981	1.86323	0.628393	3.71483	2.71901	0.758023	1.08942	3.80392	2.28981	4.17671	3.38217	1.87877	0.781774	1.45941	2.2931	4.30457	1.67159	4.15647	0.0286575	-0.0940151
914	ENSG00000140350.11	<ANP32A>	196.447	181.501	178.79	229.938	236.575	162.492	138.169	130.495	169.113	201.076	160.968	198.35	149.515	146.315	146.92	218.935	178.484	217.092	142.139	119.872	81.7151	0.268049	0.414633
915	ENSG00000136938.8	<ANP32B>	10.5955	9.06859	7.93292	7.25628	9.97375	10.4034	3.04949	9.05738	12.7015	9.26874	4.37008	8.57797	16.6528	7.86174	7.55265	9.47663	5.36382	2.25727	6.09668	3.52892	6.29507	0.508829	0.397635
916	ENSG00000139223.1	<ANP32D>	0	0	0	0	0	0	0	0	0	0	0	0	0	0	0	0	0	0	0	0	0	0	1
917	ENSG00000143401.10	<ANP32E>	2.00312	9.78599	2.6942	7.37722	3.68992	17.7172	5.67389	2.17881	1.49756	3.94267	3.46776	5.75974	6.89517	0.917502	5.65509	10.5254	2.16069	4.44289	2.79358	0.130013	1.0693	0.121471	0.285379
918	ENSG00000166825.9	<ANPEP>	21.2085	44.4784	21.8342	26.019	37.1002	49.1194	28.6282	51.3732	70.6071	31.3857	33.5275	38.504	77.4852	59.4578	16.8713	45.5527	45.6019	45.1096	13.5638	20.6535	36.3734	-0.166901	-0.0473305
919	ENSG00000169604.15	<ANTXR1>	5.57009	3.95486	6.71679	6.85891	9.2248	11.3984	6.1729	6.37438	9.18872	13.246	16.2949	15.6411	4.37474	8.79723	2.93088	5.03386	4.9658	7.79296	8.99568	5.88773	9.91688	-0.186394	-0.0701843
920	ENSG00000163297.12	<ANTXR2>	108.485	119.014	151.399	151.725	106.734	144.705	85.2932	186.369	117.142	88.8312	108.155	144.592	110.089	71.8171	99.8754	168.005	115.407	125.458	145.547	228.154	149.167	-0.0871032	-0.140106
921	ENSG00000198250.8	<ANTXRL>	0.755564	0.110368	0	1.01933	0	0	0.240263	0.342128	0.277326	0	0	0	1.40424	0	0	0.667368	1.74372	0	0.140557	0.408612	0	0.433633	-0.168631
922	ENSG00000135046.9	<ANXA1>	289.838	154.368	164.327	321.695	249.325	285.343	191.637	217.485	139.088	219.994	199.75	237.154	166.996	160.761	104.572	133.321	95.0893	159.944	234.731	82.5768	225.501	0.443113	0.711826
923	ENSG00000109511.6	<ANXA10>	0.333854	0	0	0	0	0	0	0.144054	0	0	0	0	0	0	0.263028	0	0	0	0	0	0.189714	0	0.0525489
924	ENSG00000122359.13	<ANXA11>	164.643	215.108	225.04	169.676	192.607	180.977	292.677	278.744	248.909	195.249	332.356	264.42	315.216	161.337	174.801	258.043	301.795	265.534	215.106	270.724	322.532	-0.371222	-0.62644
925	ENSG00000104537.12	<ANXA13>	0.28114	1.54516	0.561291	0.656521	2.35644	2.47866	0.11089	1.09841	0.647093	0.415018	0.176926	0	0.936159	0.233873	1.10847	1.86863	1.0993	0.125404	0.56223	0.724358	0.58639	0.0843572	0.337454
926	ENSG00000182718.12	<ANXA2>	2018.85	2802.32	2774.05	1427.5	2447.3	1628.03	2801.91	2066.97	2909.31	2140.71	2395.53	2474.26	1347.1	1635.91	2262.6	2638.85	2254.76	2565.93	1508.01	1647.56	2052.05	0.0248915	0.329828
927	ENSG00000177721.3	<ANXA2R>	0	0	0	0	0	0	0	0	0	0	0	0	0	0	0	0	0	0	0	0	0	0	1
928	ENSG00000138772.8	<ANXA3>	115.795	32.8162	10.0097	61.8512	15.9288	151.356	84.4061	54.8304	76.5788	54.108	38.3222	28.6578	29.7951	25.87	44.1323	31.8811	47.2888	44.0168	12.0704	67.2724	56.5349	0.599933	0.583166
929	ENSG00000196975.10	<ANXA4>	50.166	65.6691	62.004	90.98	68.2453	61.9666	56.0736	93.1667	75.5435	107.178	95.8233	112.694	61.8225	40.0283	61.8491	79.455	72.3263	111.699	46.8408	41.6413	57.035	0.113604	0.0650864
930	ENSG00000164111.10	<ANXA5>	278.856	238.23	210.017	118.208	277.073	306.499	318.958	210.21	235.154	208.114	218.823	203	174.468	193.665	167.38	284.204	142.075	156.558	132.563	323.454	321.359	0.288771	0.324425
931	ENSG00000197043.9	<ANXA6>	54.8751	114.801	63.6317	78.0396	73.908	70.4499	55.2974	130.315	52.5994	112.228	85.4377	93.8292	104.616	54.4745	52.6243	111.813	92.7202	63.1499	56.2054	280.679	131.162	-0.359104	-0.309795
932	ENSG00000138279.11	<ANXA7>	161.568	193.347	222.346	119.573	211.732	123.462	153.953	159.9	172.312	127.324	168.416	221.988	193.263	166.59	151.974	162.476	161.597	158.403	173.975	63.1491	114.225	-0.0155025	0.123369
933	ENSG00000165390.11	<ANXA8>	0.579852	0.257526	0.0561291	1.00206	0.986415	1.97246	0.0184817	1.47655	2.16314	3.68329	0.424623	0.264208	0	0.75559	0.319391	0.209744	0.303255	0.483701	0.298685	1.26298	0.137974	0.895479	0.680413
934	ENSG00000150165.13	<ANXA8L1>	1.31785	1.398	0.187097	0.88112	0.0913347	0	0	0.882329	0.480698	4.16747	0.725398	0.369892	0.342058	0.539707	1.08969	0	1.99011	1.09281	0	0.315746	0.914078	0.18372	0.196267
935	ENSG00000186807.9	<ANXA8L2>	5.71066	4.83781	0	1.00206	0	0	2.36566	7.97697	7.39535	13.4016	2.84851	0.686942	0.342058	1.56515	0	1.58262	0.871858	0	0.614939	10.6425	0	1.78899	0.467218
936	ENSG00000143412.5	<ANXA9>	0	0	0	0	0	0	0	0	0.129419	0	0	0	0	0	0	0	0	0	0	0.130013	0	0	0.0368037
937	ENSG00000136250.7	<AOAH>	6.13237	8.31441	7.37163	4.78569	6.77703	17.0539	8.16893	6.75252	2.05221	2.81866	13.411	5.47792	1.98034	8.54537	8.56719	1.20126	5.15533	7.20177	1.95023	5.86915	4.48416	0.281274	0.22384
938	ENSG00000002726.15	<AOC1>	0.14057	0.0183947	0.280646	0	0.146136	0	0	0.234087	0.443721	0.190217	0.159234	0.475575	0	0.179902	0.112726	0	0	0	0.158127	0	0.0862338	0.134134	0.192863
939	ENSG00000131480.4	<AOC2>	0.685279	0.386289	0.804518	0.310984	0.347072	0.750581	0	0	0.776512	0	1.32695	0.651714	1.08018	0.77358	1.01454	3.60379	0.189534	1.3257	2.91657	0	0.58639	-0.805303	-0.709959
940	ENSG00000131471.2	<AOC3>	16.8157	23.4349	12.0678	26.0881	22.4318	53.1691	46.8512	34.0507	29.0822	28.7227	63.9235	83.7012	190.832	28.0468	12.7005	215.617	44.9765	32.2288	58.2435	32.3361	57.8974	-1.06536	-0.66671
941	ENSG00000138356.9	<AOX1>	16.6576	79.6859	84.4182	36.2296	97.1801	122.746	36.7971	232.773	96.0286	17.1368	103.467	36.0909	261.441	142.591	29.0646	301.822	167.264	56.3422	117.313	115.489	78.559	-0.490607	-0.424853
942	ENSG00000267954.1	<AP000349.1>	0	0	0	0	0	0	0	0	0	0	0	0	0	0	0	0	0	0	0	0	0	0	1
943	ENSG00000187811.3	<AP000867.1>	0	0	0	0	0	0	0	0	0	0	0	0	0	0	0	0	0	0	0	0	0	0	1
944	ENSG00000268467.1	<AP000889.3>	0	0	0	0	0	0	0	0	0	0	0	0	0	0	0	0	0	0	0	0	0	0	1
945	ENSG00000215504.2	<AP000974.1>	0	0	0	0	0	0	0	0	0	0	0	0	0	0	0	0	0	0	0	0	0	0	1
946	ENSG00000224130.1	<AP001652.1>	0	0	0	0	0	0	0	0	0	0	0	0	0	0	0	0	0	0	0	0	0	0	1
947	ENSG00000254531.1	<AP001816.1>	11.0348	16.9783	5.98711	4.44015	9.15174	26.4798	9.01909	16.116	11.1855	13.3325	10.651	7.0984	13.1962	9.0311	9.69445	11.9364	7.78986	13.884	6.21967	16.846	15.2806	0.0582129	0.18172
948	ENSG00000179038.7	<AP001885.1>	0	0	0	0	0	0	0	0	0	0	0	0	0	0	0	0	0	0	0	0	0	0	1
949	ENSG00000204306.2	<AP002348.1>	0	0	0	0	0	0	0	0	0	0	0	0	0	0	0	0	0	0	0	0	0	0	1
950	ENSG00000268472.1	<AP002884.2>	0	0	0	0	0	0	0	0	0	0	0	0	0	0	0	0	0	0	0	0	0	0	1
951	ENSG00000272790.1	<AP002884.3>	0	0	0	0	0	0	0	0	0	0	0	0	0	0	0	0	0	0	0	0	0	0	1
952	ENSG00000268936.1	<AP003062.1>	0	0	0	0	0	0	0	0	0	0	0	0	0	0	0	0	0	0	0	0	0	0	1
953	ENSG00000269089.1	<AP003733.1>	0	0	0	0	0	0	0	0	0	0	0	0	0	0	0	0	0	0	0	0	0	0	1
954	ENSG00000181908.4	<AP003774.4>	0	0	0	0	0	0	0	0	0	0	0	0	0	0	0	0	0	0	0	0	0	0	1
955	ENSG00000138660.7	<AP1AR>	6.14994	4.8746	1.59033	1.81407	8.01919	9.583	4.19535	3.36726	3.88256	2.29989	3.71545	5.49554	3.5106	3.20226	4.13329	1.58262	2.46395	3.43965	5.93855	0.687211	4.77735	0.178543	0.336532
956	ENSG00000100280.12	<AP1B1>	69.3889	97.8231	105.56	58.6377	93.5998	58.4057	75.2946	75.2861	85.0835	54.8688	73.6191	72.5869	61.1024	89.0697	76.278	59.7009	74.3922	72.4656	75.5496	65.2108	60.3981	0.0524016	0.326374
957	ENSG00000166747.8	<AP1G1>	33.28	31.5101	21.8904	42.5184	31.5105	21.1734	9.92469	31.4397	23.1474	35.5878	16.9849	40.3182	35.8261	32.7782	14.2035	15.502	26.459	24.7942	28.3048	10.4382	49.4119	0.246175	0.0905452
958	ENSG00000213983.7	<AP1G2>	107.413	94.7512	131.642	199.98	119.009	115.205	122.645	112.344	108.471	107.922	137.224	121.465	182.137	144.354	119.152	64.8682	121.7	112.434	115.31	94.6308	105.688	-0.0663331	0.0489841
959	ENSG00000072958.4	<AP1M1>	35.9684	57.5387	44.604	67.017	49.3573	69.3851	40.937	53.8581	67.6305	51.981	64.0296	56.065	64.2889	64.4231	49.1862	61.9318	83.3003	62.1646	66.4485	59.7502	53.051	-0.230282	-0.577451
960	ENSG00000129354.7	<AP1M2>	1.12456	0	0.299355	0.362814	0.602809	0	1.09042	0.144054	0.351279	0.293971	0.106156	0	0.126021	0.323824	0.356966	0.190677	0	0.394127	0	0.371465	0.241455	0.256938	0.547626
961	ENSG00000106367.9	<AP1S1>	15.6736	19.1489	24.622	12.8885	21.7559	17.9616	6.81976	12.1185	19.8935	16.7391	20.6473	23.2503	13.0162	1.99692	12.6065	23.0337	25.644	24.1671	11.6311	7.80077	16.5224	0.0685164	0.0401662
962	ENSG00000182287.9	<AP1S2>	32.4893	16.5001	17.4936	19.592	15.399	19.0962	13.159	13.6671	15.2714	20.0765	10.244	22.581	4.95084	17.8823	13.4144	5.75844	8.56695	13.687	16.1114	6.44493	17.7469	0.330513	0.723153
963	ENSG00000152056.12	<AP1S3>	0.228426	1.0485	0.804518	1.45126	2.08243	1.43134	0.406598	0.144054	0.665581	0.691697	0.513086	1.35627	0.810138	2.3927	2.31089	1.54448	0.0758137	1.79149	1.21231	1.17012	2.29382	-0.572665	-0.522165
964	ENSG00000196961.8	<AP2A1>	40.5896	52.8296	28.1581	46.8721	40.4247	43.7606	32.6757	51.6433	55.7979	40.7236	38.9061	39.2261	47.5281	54.4745	42.3287	21.8515	31.2921	55.769	44.8378	40.044	53.8961	-0.00291779	0.0448603
965	ENSG00000183020.9	<AP2A2>	164.871	147.25	171.587	197.405	162.156	151.425	133.29	178.338	141.88	145.516	162.631	170.767	130.702	164.791	130.124	100.487	118.307	164.906	178.455	117.94	117.295	0.261639	0.536129
966	ENSG00000006125.12	<AP2B1>	20.1718	20.1238	21.6097	15.0309	23.1625	18.4852	13.8798	16.134	17.7858	18.2262	22.9473	24.9765	25.4023	15.6155	16.1574	28.1248	15.8072	15.6755	24.2637	10.1039	18.6955	-0.0257641	-0.210785
967	ENSG00000161203.9	<AP2M1>	326.017	236.096	307.382	404.693	390.255	256.681	190.122	245.972	396.927	345.814	371.935	369.17	298.383	269.188	245.95	284.013	253.502	259.73	255.077	240.19	228.744	0.285606	0.337537
968	ENSG00000042753.7	<AP2S1>	32.9813	71.1507	30.2349	48.548	54.472	12.1489	22.9728	35.0051	68.6658	68.6682	72.9113	20.5378	59.2121	42.7448	60.4776	66.775	75.2072	24.9017	130.771	37.8338	65.0203	-0.528422	-0.414494
969	ENSG00000132842.9	<AP3B1>	39.9571	59.6724	48.1588	43.3822	65.6514	69.612	47.5905	48.0959	66.5581	43.4558	46.107	45.7257	46.0338	48.3578	42.385	70.2453	51.6102	52.9205	44.4689	56.4813	44.4966	0.0612218	0.244147
970	ENSG00000103723.8	<AP3B2>	3.68997	8.49836	5.46324	8.1374	6.83184	25.2754	2.51352	3.31324	4.49267	6.31173	4.24623	4.84382	4.82482	3.3102	1.01454	8.77113	5.61021	2.25727	10.9986	2.17307	4.12197	0.428465	0.376576
971	ENSG00000065000.11	<AP3D1>	113.159	109.301	87.9731	132.41	113.967	93.6655	109.449	112.614	99.9851	115.046	126.095	106.723	96.1004	127.749	99.819	83.4973	89.9151	105.787	129.84	69.5383	110.224	0.0694816	0.203345
972	ENSG00000185009.8	<AP3M1>	6.30808	8.05688	9.03679	9.20857	12.0014	6.58068	3.21582	6.1763	6.93314	3.4239	10.8633	9.28252	10.3158	9.229	5.14783	8.80926	6.70951	9.79943	8.24018	0.872944	6.58826	-0.359312	-0.181256
973	ENSG00000070718.7	<AP3M2>	35.1777	30.1489	35.9414	42.3283	43.932	41.9104	24.4144	27.4242	28.2872	41.7785	34.0937	40.5472	24.8082	38.0494	26.547	29.2498	31.8038	40.828	33.1716	23.9595	26.4565	0.158674	0.355264
974	ENSG00000177879.10	<AP3S1>	75.8552	81.1759	87.786	75.4826	78.1825	175.549	77.42	71.2706	73.2139	72.1094	71.7259	83.2257	65.6572	100.278	112.125	121.156	100.434	103.799	70.8937	104.177	71.8845	-0.385669	-0.124171
975	ENSG00000157823.12	<AP3S2>	20.0664	13.4281	16.6891	28.9387	27.8936	51.9821	8.46464	23.4087	27.8805	18.157	27.7067	10.6564	26.0324	30.8892	18.8816	31.29	20.2991	23.1102	20.2403	4.25328	15.3841	0.0964759	0.198053
976	ENSG00000134262.8	<AP4B1>	57.8446	39.3463	29.1684	50.3275	48.2613	45.5062	26.9279	40.8932	29.0267	64.7255	61.075	49.9882	27.4007	52.6934	17.3598	24.1397	29.5863	54.3537	41.0428	30.0144	56.0002	0.0730262	0.145391
977	ENSG00000081014.6	<AP4E1>	0.544709	0.0735788	1.85226	1.00206	0.639343	0.418929	4.63892	2.71901	0.129419	0.0691697	4.06931	0.211367	0.180031	0	0.0939385	0.838977	3.69592	0.429957	3.18011	2.06163	0.379429	0.231772	-0.0771059
978	ENSG00000221838.5	<AP4M1>	52.5381	40.174	29.4304	46.2329	39.5845	54.8448	34.5609	39.0926	33.4639	55.9064	44.2493	46.1484	23.1879	48.5197	29.647	18.2287	24.1277	45.3783	34.2784	36.5708	45.152	0.123332	0.464261
979	ENSG00000100478.10	<AP4S1>	6.3608	9.08699	9.48583	14.8408	8.38453	9.21644	13.0481	6.62647	16.6765	10.6867	14.8087	17.0326	9.82967	8.4914	12.9635	17.7139	13.0779	9.74568	11.2973	9.04518	7.36436	-0.260096	-0.308047
980	ENSG00000254470.2	<AP5B1>	0	0	0	0	0	0	0	0	0	0	0	0	0	0	0	0	0	0	0	0	0	0	1
981	ENSG00000053770.7	<AP5M1>	6.02694	4.67226	8.81228	5.09667	4.73114	3.84018	1.12739	4.37563	4.21535	3.4239	1.96388	2.99436	8.04737	7.32203	2.53634	7.39825	3.8665	3.52923	3.56664	1.96877	9.69268	0.304981	-0.0516868
982	ENSG00000125843.6	<AP5S1>	7.81921	7.04517	3.01226	1.96956	1.84496	8.20403	5.19337	4.93384	8.67105	3.26827	7.2009	5.37224	3.67263	1.51118	4.7345	6.82622	4.52987	3.38591	6.2021	6.96498	1.69018	0.0879686	0.139722
983	ENSG00000242802.2	<AP5Z1>	23.4576	29.7259	25.333	16.0675	20.4042	15.1862	36.1133	28.4686	24.1273	20.5607	21.7973	22.581	35.6281	31.7168	16.8338	19.735	23.2938	27.4097	44.2756	32.9304	41.8061	-0.200259	-0.446906
984	ENSG00000120868.9	<APAF1>	16.8333	14.5318	14.2381	13.666	14.0107	22.7444	6.33924	11.2002	13.2192	12.5024	11.4471	20.027	12.3861	17.9723	7.38356	11.5169	11.4289	19.0972	11.104	4.14184	9.41673	0.263216	0.245017
985	ENSG00000107282.5	<APBA1>	2.03827	0	4.26582	0	1.73536	3.26416	1.0165	0	4.93639	0.760866	0.884632	3.54039	2.80848	0	2.5927	0	0.814997	1.73774	0	0	1.75917	0.438102	0.232823
986	ENSG00000034053.10	<APBA2>	1.93284	1.76589	5.08904	0.950227	1.75363	5.95228	3.47457	4.64573	1.29419	0.951083	4.21085	1.74378	1.1522	3.23824	1.82241	0.838977	2.50185	3.22467	2.28406	2.4331	4.43242	-0.320154	0.112901
987	ENSG00000011132.7	<APBA3>	23.3522	25.4583	23.8362	53.9556	31.2913	25.9911	26.4843	26.938	23.2953	34.6194	38.623	29.9084	22.2518	31.7348	30.2482	18.3431	24.0519	39.3052	46.7178	18.0718	13.6249	-0.185595	0.0777876
988	ENSG00000166313.14	<APBB1>	53.9086	67.0671	36.4652	67.1552	47.695	101.678	79.8041	69.4159	67.5195	73.0432	83.9692	66.2459	47.7261	67.8592	66.7151	50.5675	57.6753	57.3276	65.8512	128.508	88.8553	0.0234012	-0.160504
989	ENSG00000077420.11	<APBB1IP>	20.2597	17.6957	36.2968	6.15056	23.9297	13.5977	13.0666	14.9096	8.78198	2.90513	30.0952	15.6764	19.4433	19.1596	12.6817	31.8811	15.1248	15.7472	32.9256	17.5146	7.79553	-0.288095	-0.320711
990	ENSG00000163697.12	<APBB2>	49.9727	61.3831	95.4944	34.7438	44.1877	93.5259	52.7469	104.151	105.735	42.8506	60.7919	76.2153	95.8843	84.2303	47.2323	56.1352	51.1363	73.7913	26.214	46.266	82.612	-0.090504	0.137897
991	ENSG00000113108.13	<APBB3>	176.574	176.939	148.237	205.75	173.865	282.882	128.06	190.943	151.179	204.517	193.841	208.108	145.339	167.903	106.263	116.332	103.145	188.375	155.351	79.9951	185.903	0.185668	0.557836
992	ENSG00000134982.12	<APC>	3.60211	4.92978	2.03936	3.42082	1.26042	2.79286	1.9221	3.83543	4.56663	1.52173	1.78696	5.93588	3.87066	2.5906	1.42786	0.800842	1.51627	4.28165	0.878484	0.222879	2.9147	0.657307	0.280499
993	ENSG00000115266.7	<APC2>	26.3569	9.36291	2.99355	23.7039	35.1273	14.2785	9.09302	9.63359	12.8864	10.6003	12.5795	9.44105	0.612104	7.87973	2.64906	2.28812	7.69509	12.3613	19.2739	3.93753	8.12322	0.54702	0.666189
994	ENSG00000154856.8	<APCDD1>	30.4334	88.7177	44.3607	58.1539	16.1662	44.1097	46.2968	79.3556	56.7038	18.4683	28.0959	82.6972	52.929	62.75	24.9125	39.1078	29.3209	44.1422	30.1671	33.5248	41.4957	0.210469	0.191053
995	ENSG00000198768.6	<APCDD1L>	0	0	0.112258	0	0	0	0.0369635	0	0	0	0	0	0.216037	0	0	0	0	0	0	0	0.241455	0	-0.255417
996	ENSG00000132703.3	<APCS>	0	0	0	0	0	0	0	0	0	0	0	0	0	0	0	0	0	0	0	0	0	0	1
997	ENSG00000164062.8	<APEH>	66.1734	129.83	69.0014	58.1021	79.79	45.5236	95.9572	89.2773	99.412	67.0427	72.5752	77.9239	55.9175	111.432	81.0689	67.9381	65.3135	83.6803	98.1969	46.4703	71.4878	0.0355015	0.143738
998	ENSG00000100823.7	<APEX1>	97.3097	113.992	117.516	48.1333	112.232	134.546	124.567	111.083	116.403	76.7265	80.7669	105.472	129.262	149.679	104.46	121.48	95.3357	91.115	125.939	133.653	142.648	-0.10253	-0.328003
999	ENSG00000169188.4	<APEX2>	3.12769	4.80102	3.6671	0	0	0	2.03299	0.972363	2.2186	0.0691697	3.45006	0.845467	1.1702	2.93241	0.845446	2.63134	4.4351	3.95918	1.82725	1.24441	1.86265	-0.238476	-0.27717
1000	ENSG00000117362.8	<APH1A>	180.264	205.027	221.149	127.417	157.972	180.646	227.806	174.701	168.984	141.417	163.161	177.09	209.052	216.135	211.662	213.691	228.275	221.266	188.979	92.7735	178.193	-0.235571	-0.245385
1001	ENSG00000138613.9	<APH1B>	1.44084	2.90636	7.97034	6.87619	7.87305	1.22188	2.99404	6.78853	3.29093	3.6487	5.09548	2.28981	5.36491	1.88898	4.49026	5.37708	5.21219	2.526	4.1113	8.71087	10.2101	-0.49519	-0.143041
1002	ENSG00000166181.8	<API5>	13.7934	12.49	14.2007	17.7952	18.614	14.488	7.02306	14.0092	12.683	10.7905	12.3318	15.7644	11.594	13.7625	10.2957	14.644	7.71404	11.8596	19.6253	3.90039	17.3847	0.166483	0.175371
1003	ENSG00000149089.8	<APIP>	69.8106	43.3379	35.0059	39.5122	50.9465	57.9693	66.4603	38.4623	52.6734	43.9746	48.1947	67.9016	42.6313	47.3323	71.2617	57.0505	45.3555	47.3669	37.1247	96.2281	32.5274	0.0028203	-0.187058
1004	ENSG00000175279.17	<APITD1>	11.228	19.0017	18.5413	6.80708	18.0477	12.1839	13.8798	17.3945	18.5623	11.2747	12.261	19.569	10.2978	14.5181	13.8277	17.5232	17.7783	13.5257	9.96201	12.5555	18.0401	0.171573	0.0301117
1005	ENSG00000251503.3	<APITD1-CORT>	2.26669	2.20737	2.93743	0	1.22388	1.90264	2.1254	1.6206	2.75477	1.79841	1.85773	0.651714	0.23404	1.45721	2.53634	0.991519	1.34569	1.02115	1.65155	2.80456	2.3973	0.361197	0.295939
1006	ENSG00000169621.5	<APLF>	3.11011	1.0301	1.59033	1.93501	1.73536	7.05197	2.21781	1.72864	0.887442	1.41798	0.884632	3.27618	2.03435	1.92496	0.131514	0.629233	0.871858	2.68723	1.61641	3.43606	1.22452	0.0767189	0.27176
1007	ENSG00000171388.9	<APLN>	0.562281	1.98663	1.12258	0.501029	1.27869	6.98215	0.0369635	0.630235	0.0184884	1.46986	3.99854	1.44434	0	1.34927	2.31089	0.133474	1.64895	1.9348	3.1274	0.315746	0.793351	-0.498371	-0.0378611
1008	ENSG00000134817.9	<APLNR>	3.3034	3.93647	0.598711	5.96052	6.92317	6.51085	7.09699	1.3325	2.90267	4.46144	17.7988	23.7964	16.0587	4.76741	5.14783	22.4045	26.857	23.4864	4.21672	0.817224	6.3813	-1.81718	-0.956347
1009	ENSG00000105290.7	<APLP1>	35.002	20.1974	14.2381	28.0058	12.4215	58.2137	19.0177	15.5218	25.0333	58.4657	16.7372	26.9669	2.82648	26.1398	33.4609	15.0825	22.8578	20.5125	16.3222	42.2356	13.0558	0.137601	0.354605
1010	ENSG00000084234.12	<APLP2>	232.275	223.588	245.528	299.736	207.951	313.673	225.717	194.202	205.813	203.895	184.658	300.141	219.547	233.297	295.53	253.886	237.714	246.903	200.611	149.663	190.611	-0.0543563	0.111085
1011	ENSG00000101474.7	<APMAP>	31.8743	39.1807	48.9259	20.7668	32.4238	42.3118	40.1793	28.1985	39.2323	15.4075	35.3853	29.3976	72.7684	32.0046	22.4513	65.65	30.0601	32.3542	32.0822	40.564	45.6349	0.143981	-0.318851
1012	ENSG00000118137.5	<APOA1>	12.8973	26.8195	21.8904	9.41589	10.9602	0	15.192	13.0909	22.5743	37.6629	12.1725	22.0174	4.30273	7.0162	17.1532	1.08686	9.98846	28.2876	8.18747	27.7485	11.0897	0.337218	0.25111
1013	ENSG00000163382.7	<APOA1BP>	100.596	165.387	112.034	120.973	149.095	112.622	156.707	130.639	163.4	122.24	118.028	105.701	100.889	129.224	224.851	127.525	138.133	133.125	130.894	210.491	116.674	-0.0313045	-0.133236
1014	ENSG00000158874.7	<APOA2>	1.17727	0.220737	0.916776	0.863843	0	0	0	0.432161	0.554651	1.72924	0.247697	0	1.00817	0	0	0	0	0.125404	1.75697	0	0	0.990456	0.373678
1015	ENSG00000110244.5	<APOA4>	0	0	0	0	0	0	0	0	0	0	0	0	0	0	0	0	0	0	0	0	0	0	1
1016	ENSG00000110243.7	<APOA5>	0	0	0	0	0.127869	0	0	0	0	0	0	0	0	0	0.319391	0	0	0	0	0	0	0	-0.144613
1017	ENSG00000084674.9	<APOB>	0	0	0	0	0	0	0	0	0	0	0	0	0	0	0	0	0	0	0.052709	0	0	0	-0.224464
1018	ENSG00000111701.6	<APOBEC1>	0	0	0	0	0	0	0	0	0	0.172924	0	0	0	0	0	0	0	0	0	0	0	0	0.328507
1019	ENSG00000124701.5	<APOBEC2>	0	0	0	0	0	0	0	0	0	0	0	0	0	0	0	0	0	0	0	0	0	0	1
1020	ENSG00000128383.8	<APOBEC3A>	0.667708	0	0.710969	0	0.89508	1.76299	0	1.11642	0.351279	0.328556	0.300775	1.779	3.04252	3.09432	0.48848	0.57203	0	0	0	0	0.327688	0.286472	-0.217355
1021	ENSG00000179750.11	<APOBEC3B>	0	0.220737	0.299355	0.656521	0.42014	0.523661	0.462043	0.288107	0.11093	0.276679	0.424623	0.968764	0.180031	1.02544	0.356966	0.114406	0.284301	0.465786	0.105418	0.0742931	0	0.0172428	-0.0922522
1022	ENSG00000244509.3	<APOBEC3C>	0.96642	3.1455	1.85226	8.65571	3.54379	7.41853	0.813196	3.54732	0	3.63141	1.4331	8.59558	1.29622	0.269854	2.21695	0.953383	1.36465	7.52424	0	0	0.983065	1.09788	0.274427
1023	ENSG00000243811.3	<APOBEC3D>	1.88013	0.864551	0.505162	0	1.86323	8.65787	0	0.972363	0	0	1.4331	1.72616	0	2.15883	0	0.629233	0	1.39736	1.24745	0.612918	1.328	-0.560536	0.189329
1024	ENSG00000128394.12	<APOBEC3F>	3.0574	2.15218	2.8813	4.26739	4.56674	0	1.95906	2.1428	4.43721	2.93971	4.24623	6.42907	1.65628	1.36726	6.83872	2.15465	2.67243	5.53569	2.1435	5.4234	4.39792	-0.476798	-0.434897
1025	ENSG00000239713.3	<APOBEC3G>	15.9899	16.592	11.3381	8.53477	11.1428	19.55	13.0481	12.6047	7.17349	9.00935	17.3919	24.4481	7.74132	5.23516	21.4368	3.14616	13.6086	24.7404	7.57253	17.3474	14.401	-0.25679	-0.208147
1026	ENSG00000100298.11	<APOBEC3H>	2.16127	0.588631	1.30968	1.38215	1.00468	0.349107	1.1089	3.85344	0.480698	2.02321	0.990788	3.10005	2.70046	2.87844	0.751508	0.762707	1.61104	0	1.1596	1.1144	2.27657	0.0425645	-0.102593
1027	ENSG00000173627.6	<APOBEC4>	0	0	0	0	0	0	0	0	0	0	0	0	0	0	0	0	0	0	0	0	0	0	1
1028	ENSG00000184730.6	<APOBR>	2.10855	5.77594	7.16582	1.50309	2.95924	3.29907	4.67588	3.65536	2.32953	0.587942	3.34391	2.07844	3.45659	4.08379	3.38178	3.20337	5.06056	2.56183	3.16254	4.12327	1.12104	-0.0829401	0.0762874
1029	ENSG00000130208.5	<APOC1>	18.608	22.9566	248.951	13.5796	6.7953	5.49844	6.20986	6.08627	16.1034	3.37202	8.13861	5.65406	24.0881	15.0938	41.765	23.11	16.7927	4.47872	13.4759	9.06376	2.12135	-0.387027	0.260862
1030	ENSG00000234906.4	<APOC2>	0.843421	2.06021	12.9284	0.138215	0.65761	7.69782	4.38017	0.774289	0.517674	0	3.09621	1.49718	0	0	2.79937	0.514827	1.0993	0.125404	2.23135	2.6374	1.50047	-0.60966	0.361864
1031	ENSG00000110245.7	<APOC3>	0	2.796	0	0	0.785478	0	0	0.846316	0	0.985668	0	0	0	1.49319	0	0	0	0	0.456812	0	2.01787	0	0.158736
1032	ENSG00000267467.2	<APOC4>	0.28114	0.0367894	1.62775	0	0	1.53607	0	0.648242	0.369767	0	0	0	0.23404	0	0	0.228812	0	0.197063	0	0	0	0.398273	0.607416
1033	ENSG00000224916.4	<APOC4-APOC2>	1.8977	0	3.33033	0	0	1.71063	0	0	0	1.12401	1.80465	0	0	2.33873	0	0	2.33127	0	0	0	0	0	0.14074
1034	ENSG00000189058.4	<APOD>	1327.56	10878.3	5059.13	4206.5	777.076	4287.69	1974.53	9604.21	2594.77	315.258	1439.97	550.54	4309.88	834.855	3492.2	1290.86	3123.16	4783	3189	954.908	1389.3	1.23948	0.459859
1035	ENSG00000130203.5	<APOE>	6.46623	12.3245	486.584	16.6203	6.59437	24.0535	40.2717	5.61809	16.0294	9.64917	29.0159	15.9406	39.8588	37.7615	35.1893	35.4087	21.2847	7.50633	28.99	32.0575	11.4691	-1.00794	0.237965
1036	ENSG00000175336.8	<APOF>	0.14057	0	0	0	0	0	0	0.0720269	0.203372	0.0864621	0	0	0.126021	0	0	0	0	0.250808	0	0	0.0862338	0	0.0825147
1037	ENSG00000091583.6	<APOH>	0	0.846157	0	0	0	0	0	0	0.68407	0.172924	0	0.299436	0	0.197893	0.281815	0	0	0	0.281115	0.148586	0	0	0.176581
1038	ENSG00000100342.16	<APOL1>	31.8567	24.0235	40.0388	38.5792	42.014	21.3654	26.1701	29.9452	33.0757	25.489	50.2471	35.263	45.0257	21.7322	29.7221	34.8748	32.7705	29.5774	43.1336	15.9916	38.9432	-0.171913	-0.246572
1039	ENSG00000128335.9	<APOL2>	143.575	94.0705	72.2569	137.576	123.028	107.351	84.0549	98.3347	77.4293	97.7022	70.9475	96.6298	60.4543	101.951	87.0246	90.0947	73.8425	99.2304	173.588	71.1914	98.134	0.120966	0.271662
1040	ENSG00000128284.15	<APOL3>	57.8798	75.4551	111.005	62.8532	98.9337	91.1171	63.226	131.971	99.4859	36.0547	47.9647	77.0784	186.368	80.5603	44.7899	105.215	112.735	61.663	78.6243	43.7958	68.6421	0.111055	0.00606231
1041	ENSG00000100336.13	<APOL4>	13.8462	16.6288	17.5871	11.4891	41.813	22.0112	10.8673	43.4322	14.3285	9.99502	16.1357	2.62447	5.56295	13.9964	16.6459	38.3069	10.178	20.7454	23.3677	11.3483	46.1523	-0.0581353	0.0860752
1042	ENSG00000128313.2	<APOL5>	0	0	0	0	0	0	0	0	0	0	0	0	0	0	0	0	0	0	0	0	0	0	1
1043	ENSG00000221963.5	<APOL6>	0	0	0	0	0	0	0	0	0	0	0	0	0	0	0	0	0	0	0	0	0	0	1
1044	ENSG00000178878.8	<APOLD1>	56.1051	78.8029	103.82	84.5011	103.848	236.677	63.3924	73.6835	66.6321	99.2239	70.7528	82.9791	344.039	115.012	26.7725	265.918	187.942	73.6838	88.7796	45.3931	123.073	-0.120034	-0.295425
1045	ENSG00000204444.6	<APOM>	8.18821	8.57194	13.4336	2.19416	6.4117	7.06943	18.4263	13.307	7.00709	3.82162	8.45708	9.01832	10.0457	11.01	5.46722	7.0169	11.4289	11.8776	5.97369	9.1009	19.1094	-0.240125	-0.165825
1046	ENSG00000184831.9	<APOO>	35.74	42.4734	19.3833	30.2	28.9348	34.4395	48.3297	37.9582	68.6658	46.6377	38.0922	27.8828	11.576	34.8111	59.2376	47.8217	58.3007	44.6617	27.4263	50.4079	22.3518	-0.0472391	0.0423637
1047	ENSG00000155008.9	<APOOL>	0	0	0	0	0	0	0	0	0	0	0	0	0	0	0	0	0	0	0	0	0	0	1
1048	ENSG00000256053.3	<APOPT1>	79.4748	78.3063	83.3705	89.9261	68.4462	82.6337	60.3244	84.5955	93.9764	83.7126	89.3124	78.6284	89.8353	85.5616	91.9657	82.3151	95.6579	67.8973	51.7076	97.844	53.3615	-0.0435568	0.00563324
1049	ENSG00000142192.16	<APP>	344.467	309.601	425.253	377.69	226.656	287.246	370.522	236.032	350.539	256.429	207.588	595.949	199.996	198.99	379.38	245.801	269.688	369.261	217.196	387.736	187.11	0.411222	0.156093
1050	ENSG00000062725.5	<APPBP2>	10.6306	3.80771	8.30711	15.1864	13.9925	13.6501	1.27524	3.2232	5.45407	2.04051	9.78403	19.569	2.44842	4.02981	4.80965	8.98087	3.35476	6.09105	15.4965	0.260026	10.7965	0.163228	-0.00328181
1051	ENSG00000157500.6	<APPL1>	1.59899	0.882946	5.22001	2.79885	5.16954	18.4154	1.84817	2.28685	2.25558	3.02617	1.34464	5.51315	5.04086	3.27422	3.9642	2.86015	1.76267	4.06667	4.79652	0.297172	2.48353	-0.310756	0.209748
1052	ENSG00000136044.7	<APPL2>	38.3932	40.5235	49.8427	46.2847	46.2884	29.5869	35.7252	37.49	40.7669	37.4035	35.2083	34.1181	27.5987	55.1941	19.3513	34.1311	36.0684	48.1551	42.4835	19.5948	60.4499	0.162237	0.188939
1053	ENSG00000198931.6	<APRT>	103.214	166.435	113.082	97.5624	141.825	118.662	151.809	172.666	164.177	69.5155	130.112	72.6926	148.381	123.215	134.031	97.779	172.287	93.838	145.986	215.246	155.152	-0.0412081	-0.103535
1054	ENSG00000137074.14	<APTX>	65.5584	61.1808	50.404	66.0494	63.8612	88.1671	60.9528	44.2965	64.7278	54.7305	57.908	53.3173	55.3234	67.2475	42.6105	51.273	51.9134	55.0165	61.4587	51.4665	69.2975	0.182915	0.424026
1055	ENSG00000240583.6	<AQP1>	23.3171	7.68899	3.44259	20.3521	39.347	0	16.0052	21.1939	11.3519	14.9234	38.0922	5.77736	15.7527	7.44796	14.5417	20.5359	17.5509	8.33041	25.5639	346.54	23.5073	-0.177222	-0.317696
1056	ENSG00000143595.8	<AQP10>	0.175713	0.110368	0	0	0.23747	0	0	0	0	0	0	0	0.144025	0	0	0.24788	0	0	0.105418	0	0	0	0.0657707
1057	ENSG00000178301.3	<AQP11>	0	0	0	0.466475	0	2.46121	0	0	0	0	0	0	0.846144	0	0	0	0	0	0	0	3.01818	0	-0.0477598
1058	ENSG00000184945.9	<AQP12A>	0	0.183947	0	0	0	1.02987	0	0	0	0	0.566164	0	0	0	0.394541	0.533895	0	0.125404	1.26502	0	0.965818	-0.32286	-0.413969
1059	ENSG00000185176.8	<AQP12B>	0	0.533447	0	0.0691075	0.292271	1.02987	0	0.0540201	0.11093	0.0864621	0.212312	0	0.0180031	0.179902	0.0751508	0.0762707	0.132674	0.0358297	0.052709	0.0185733	0.500156	0.00659201	0.27723
1060	ENSG00000167580.3	<AQP2>	0	0.0735788	0	0	0	0	0	0	0.166395	0	0.0707705	0	0	0	0	0	0	0	0	0	0	0	0.308856
1061	ENSG00000165272.10	<AQP3>	3.95354	6.21741	0.280646	1.98684	2.02763	0.139643	2.27325	12.7127	6.26756	7.19365	0.690013	1.81423	0.486083	2.48265	1.20241	3.90887	3.08941	1.88106	3.98832	4.04897	5.27751	0.276758	0.402792
1062	ENSG00000171885.9	<AQP4>	0.0351425	0	0.0561291	0.345537	0.23747	1.43134	0	0	0	0.172924	0	0	0.216037	0.107941	0	0.209744	0.416975	0.125404	0.140557	0	0.0862338	-0.155994	0.24054
1063	ENSG00000161798.6	<AQP5>	0.193284	0	0	0	0.383606	0	0	0	0	0	0	0	0.378064	0.485737	0	0.419489	0	0	0	0	0.793351	0	-0.418481
1064	ENSG00000086159.8	<AQP6>	0.316283	0.3495	0.392904	0.103661	0.200936	1.01241	0.554452	0.180067	0.184884	1.24505	0.194619	0.176139	0.630107	1.74505	0.48848	0.114406	0.227441	0.340382	0.158127	0.222879	0.465662	0.195298	0.0364799
1065	ENSG00000165269.8	<AQP7>	1.82741	4.78262	1.96452	2.69519	10.7044	17.6997	9.92469	14.8916	25.4955	4.04643	18.1526	77.5892	313.001	59.08	4.80965	178.874	5.17429	21.8382	30.0969	15.2487	23.1796	-1.59221	-0.610307
1066	ENSG00000103375.6	<AQP8>	0.632566	1.25084	0.916776	0	0.219203	1.34406	2.51352	1.76466	1.47907	0.830036	1.29156	1.00399	0.180031	1.33128	0	0.152541	1.3836	0.841998	0	1.72731	2.81122	0.0746006	0.105849
1067	ENSG00000103569.5	<AQP9>	0.773136	0.0919736	0	0.829289	0.127869	0.94259	0.147854	0	0.406744	0.121047	0	0.387506	0.126021	0	0.206665	0	0	0.232893	0.966332	0.334319	0.379429	-0.147783	0.226129
1068	ENSG00000172901.15	<AQPEP>	1.00156	1.89466	2.39484	0.863843	7.01451	19.6198	2.05147	2.75503	2.6993	1.21047	8.13861	7.78534	46.6639	18.5659	2.1418	26.5041	4.07499	2.43642	15.5843	1.35585	3.29413	-1.60528	-0.548871
1069	ENSG00000021776.6	<AQR>	24.6349	19.7007	19.6452	17.5706	23.4913	30.5993	28.9794	25.1914	26.6787	20.2494	19.3204	22.8805	33.7737	31.0692	12.9259	19.0105	14.6889	19.9572	30.2374	33.8034	44.7553	0.0711898	-0.187073
1070	ENSG00000169083.11	<AR>	0.0351425	0.0919736	0.187097	0.0345537	0.219203	0	0.166336	0.342128	0.11093	0.155632	0.106156	0.123297	0.522089	0.143922	0	0.114406	0.0758137	0.143319	0.404103	0.148586	1.31075	-0.0226883	-0.375745
1071	ENSG00000078061.8	<ARAF>	121.505	124.845	119.013	112.68	131.102	129.973	129.908	116.702	141.935	107.161	126.007	130.008	124.203	134.045	148.254	109.563	113.171	110.32	142.508	150.369	157.497	-0.0775851	-0.406901
1072	ENSG00000186635.10	<ARAP1>	139.902	102.385	119.518	235.743	116.086	95.3762	106.991	116.575	111.522	173.547	244.265	190.212	71.2561	128.882	128.207	77.0715	110.953	228.379	122.004	75.8161	101.79	-0.0684047	-0.0361074
1073	ENSG00000047365.7	<ARAP2>	4.19953	8.86625	6.77292	7.15262	9.59014	6.42358	8.83427	7.81491	6.02721	6.77863	7.89092	5.42508	5.68897	9.19301	2.21695	4.5381	4.98475	6.23437	14.2139	4.19756	10.6412	0.270564	0.108478
1074	ENSG00000120318.11	<ARAP3>	27.4463	21.1171	24.173	39.1321	21.9934	22.7793	28.9978	17.7906	16.4546	30.6595	22.6289	28.7635	52.803	24.8445	33.63	15.9978	24.9806	22.4832	28.6913	19.7991	47.4976	-0.0878026	-0.319285
1075	ENSG00000198576.2	<ARC>	0	1.17726	0	0	0	0	1.58943	0	0	0	0	0	0	0	0	0.743639	0.568603	0	0	0.241453	1.56945	0	-0.00805786
1076	ENSG00000095139.9	<ARCN1>	103.091	115.574	90.7234	93.1741	104.56	97.5406	150.756	87.5486	108.36	78.4903	84.9954	84.6876	82.184	112.853	110.885	107.103	128.883	95.7012	91.6259	124.924	86.2165	0.0675927	0.0791926
1077	ENSG00000109321.6	<AREG>	10.5428	21.6874	44.6788	11.2818	24.295	33.8634	18.223	10.822	7.33988	13.0039	10.2794	7.94387	29.6691	16.3531	3.30663	64.9063	12.3008	1.25404	6.39536	18.0346	24.2834	0.332034	0.0870396
1078	ENSG00000205595.3	<AREGB>	0.790707	0.735788	3.03097	0.466475	1.49789	3.47362	0.85016	0.10804	0.11093	0	0.159234	0	0.990169	0.125932	0.281815	1.2394	0.322208	0	0	0	0.327688	0.938276	0.615145
1079	ENSG00000119682.12	<AREL1>	13.5474	19.1305	10.2155	16.3094	20.8426	21.3479	24.2296	21.41	24.1273	15.1136	12.2079	15.5355	17.0489	24.4487	6.27509	18.4575	12.3766	17.252	17.2183	12.2212	23.8523	0.223295	0.360973
1080	ENSG00000143761.9	<ARF1>	19.592	67.7845	58.5801	76.2082	55.7324	7.90728	59.4373	30.4313	33.9631	24.5552	35.3322	58.9009	33.3237	42.9787	31.7324	52.8365	31.5006	48.2089	47.9652	7.72648	38.65	0.212021	0.164439
1081	ENSG00000134287.5	<ARF3>	4.65639	5.18731	34.6504	48.237	29.8299	5.58572	25.6896	5.16793	17.4715	28.6708	24.1504	27.6362	7.47127	20.4549	39.6045	38.1925	36.637	24.9196	46.0326	27.2284	8.65787	-0.328588	-0.349034
1082	ENSG00000168374.6	<ARF4>	14.5139	16.592	12.9845	14.3398	20.7878	30.8611	16.4857	14.0092	24.8669	13.5054	14.048	9.91662	8.15539	21.6243	17.1156	14.644	9.64729	19.7959	23.0338	4.49473	28.3192	0.0793096	0.254098
1083	ENSG00000004059.6	<ARF5>	120.152	115.151	115.907	91.6883	114.534	160.363	127.709	121.491	90.6485	197.428	77.6353	116.569	93.958	80.4524	86.7428	86.0333	119.653	93.7843	94.6127	74.4603	119.606	0.330157	0.853394
1084	ENSG00000165527.5	<ARF6>	0	0	0	0	0	0	0	0	0	0	0	0	0	0	0	0	0	0	0	0	0	0	1
1085	ENSG00000101199.8	<ARFGAP1>	345.065	205.782	173.776	197.786	274.424	247.29	220.968	296.409	209.399	217.625	236.285	245.767	140.532	250.55	198.999	91.6011	156.044	214.674	271.996	103.992	380.067	0.0306653	0.311277
1086	ENSG00000149182.10	<ARFGAP2>	162.657	213.655	169.416	171.058	154.666	203.599	181.971	216.639	189.173	212.092	172.45	185.087	180.409	225.13	144.083	158.796	169.917	177.178	198.098	168.255	184.109	0.0665969	0.289106
1087	ENSG00000242247.6	<ARFGAP3>	0.14057	6.73246	0.954196	0.673798	5.16954	7.22653	6.41316	5.38401	5.47256	2.29989	2.6539	4.66768	1.87232	8.72527	5.29813	9.19062	4.22661	2.56183	5.56959	0.334319	2.24208	0.289457	-0.0655694
1088	ENSG00000066777.4	<ARFGEF1>	40.5721	31.7309	50.3478	28.8696	41.265	61.024	54.4287	39.6508	42.4493	38.1817	41.4362	32.4624	52.1549	71.907	29.0646	42.1586	38.3428	45.8979	53.0604	51.968	51.93	-0.163782	-0.230309
1089	ENSG00000124198.8	<ARFGEF2>	2.31941	2.097	0	0	0	0	0	0	0	3.82162	0	2.64208	1.94433	0	0	0	0	0	0	0	3.62182	0	0.0406742
1090	ENSG00000164144.10	<ARFIP1>	4.76181	10.4482	11.0387	7.29084	8.64026	4.62567	5.064	6.95059	7.30291	5.58545	11.2525	10.2161	6.12104	7.05218	7.83447	4.67158	12.3197	7.97211	8.97811	8.56228	11.0552	-0.249948	-0.4767
1091	ENSG00000132254.8	<ARFIP2>	84.7111	90.3916	80.695	90.047	93.1614	101.049	88.0285	82.0206	91.6468	83.2111	83.4031	82.1864	98.7648	102.095	97.1136	58.1373	88.4746	77.0339	114.677	64.7464	112.069	0.00910288	-0.024845
1092	ENSG00000101246.15	<ARFRP1>	99.5588	107.388	85.1292	84.7776	109.309	67.9712	120.741	96.2279	112.502	128.673	105.112	85.9734	62.5967	100.116	99.5748	72.8957	125.908	111.502	136.798	71.8786	73.6781	0.0551386	0.203394
1093	ENSG00000118520.9	<ARG1>	1.19485	0.93813	0.449033	0	1.04122	5.673	0.720788	1.94473	0.314302	0.259386	0.849246	0.123297	1.60227	2.12285	0.469692	0.457624	0.132674	0.752424	1.26502	0.185733	2.34556	0.0861161	0.173273
1094	ENSG00000081181.3	<ARG2>	1.86255	3.25586	3.83549	1.08844	2.2103	2.25174	6.69039	1.94473	3.84558	1.12401	0.955402	0.95115	2.3764	0.917502	2.2921	1.98304	4.66254	0.931573	1.49342	5.81343	3.39761	0.137335	0.198703
1095	ENSG00000186103.3	<ARGFX>	0	0	0	0	0	0	0	0	0	0	0	0	0	0	0	0	0	0	0	0	0	0	1
1096	ENSG00000134884.9	<ARGLU1>	724.094	372.714	479.231	545.344	486.083	792.823	491.707	532.855	422.626	581.285	527.789	496.536	579.303	727.759	342.105	318.373	320.161	497.782	625.428	425.049	806.7	0.0413785	0.133722
1097	ENSG00000175220.7	<ARHGAP1>	9.89262	8.40638	15.922	9.69232	13.8463	22.3603	5.93264	14.5494	10.8896	7.83347	11.9248	15.007	19.0112	19.5374	4.64056	15.5974	12.3197	9.87109	20.0821	0.612918	21.8344	-0.509769	-0.21106
1098	ENSG00000071205.7	<ARHGAP10>	33.0867	47.348	51.3582	29.4225	17.3171	36.8483	62.6901	70.6583	72.5299	48.5052	33.1383	30.1726	64.9551	71.4213	37.9323	31.6333	41.6217	32.7305	46.015	150.982	114.174	0.201236	-0.289075
1099	ENSG00000198826.6	<ARHGAP11A>	0.42171	0.643815	1.66516	1.123	0.785478	1.08223	0.720788	1.63861	0.184884	2.38635	1.18541	0.775011	1.7823	5.95477	1.31514	2.87922	0.303255	0.69868	0.052709	0.0742931	0.0172468	0.16939	-0.160432
1100	ENSG00000187951.6	<ARHGAP11B>	1.75713	1.78429	3.83549	2.71247	2.33817	3.99728	0.979532	4.05151	3.42035	1.19318	2.61851	3.24096	1.53026	2.62658	4.56541	5.09107	2.17964	1.52276	1.7394	0.705784	2.24208	0.141817	0.032204
1101	ENSG00000165322.13	<ARHGAP12>	56.2808	37.1757	45.8762	61.9548	48.5718	65.0562	54.6505	41.3614	61.973	56.2349	64.3127	60.5214	42.0372	72.8425	59.2188	49.0039	48.407	91.115	50.6358	47.8633	35.994	0.129616	-0.200117
1102	ENSG00000075884.8	<ARHGAP15>	93.2331	81.5254	21.4975	137.541	49.7226	44.2145	78.2517	58.3237	68.4994	146.501	59.1288	135.063	10.7658	23.2434	103.915	18.9533	15.4091	66.6254	39.7426	14.5986	51.2229	0.876373	0.512574
1103	ENSG00000140750.12	<ARHGAP17>	162.833	105.144	110.537	144.417	140.126	147.568	116.25	129.54	131.415	135.521	140.656	170.732	207.701	144.857	85.9537	112.919	116.166	128.808	144.721	95.1323	132.869	0.00646521	-0.0585599
1104	ENSG00000146376.6	<ARHGAP18>	0	0	1.51549	0	0	0	1.46006	0	0	0.172924	0	0.264208	0	0	0	0	0	0	0	0	4.08748	0	-0.0579633
1105	ENSG00000213390.6	<ARHGAP19>	118.079	120.062	37.2885	102.383	34.9629	117.859	148.87	122.644	122.763	233.707	97.3095	105.701	14.7805	86.2092	90.3688	63.1712	73.3687	148.998	79.1338	43.22	88.7345	0.463605	0.531808
1106	ENSG00000137727.8	<ARHGAP20>	5.39438	3.29265	4.60259	3.52448	4.4754	10.159	4.78677	5.20394	4.27081	5.03209	9.8371	13.6684	15.4466	7.48394	3.09997	11.3834	8.73753	10.5698	6.64134	2.80456	3.36312	-0.830472	-0.723691
1107	ENSG00000107863.12	<ARHGAP21>	82.9364	77.2394	79.2544	99.4629	79.2055	122.973	63.5402	102.26	79.7773	96.4917	129.829	129.18	108.288	109.956	53.2255	88.4549	77.3679	120.352	91.0109	44.8545	86.5787	-0.160841	-0.18538
1108	ENSG00000128805.10	<ARHGAP22>	11.5092	13.1522	9.03679	12.4739	9.20654	9.67028	21.9748	10.5519	11.6292	10.5657	21.9919	30.2607	4.55478	15.3817	12.0617	4.55717	12.9073	22.4832	12.3866	17.366	12.3314	-0.216696	-0.367232
1109	ENSG00000225485.3	<ARHGAP23>	26.7786	19.9583	17.4562	19.0391	16.1845	10.2463	22.5662	21.446	22.5003	28.7573	27.7597	34.3999	29.561	23.5312	39.2663	14.7202	16.2241	26.2811	22.3486	0.91009	27.8363	-0.337006	-0.290576
1110	ENSG00000138639.13	<ARHGAP24>	78.5436	50.9533	54.6698	67.2243	63.1488	34.5966	49.2538	31.8179	47.2193	93.7422	42.5154	108.185	26.7886	31.8068	60.9285	41.5484	29.3209	48.8001	37.2829	21.2664	40.5126	0.378381	0.414805
1111	ENSG00000163219.7	<ARHGAP25>	7.67864	11.3127	17.9987	9.46772	7.25198	9.61791	12.1979	8.87731	8.78198	3.92538	12.4733	15.3241	26.8066	9.13904	9.29991	6.48301	12.2439	14.314	8.04691	7.2993	5.53621	-0.0188769	-0.260017
1112	ENSG00000145819.11	<ARHGAP26>	38.7271	24.4098	34.7814	38.6311	35.0725	30.7913	27.6487	40.3891	23.3878	29.2588	24.8582	35.4039	33.5937	45.2095	23.6537	16.8367	20.6971	24.7763	45.5757	30.5159	38.9087	0.101922	0.122072
1113	ENSG00000159314.7	<ARHGAP27>	29.0804	41.5537	36.222	22.1317	36.5156	21.9763	34.7087	38.1922	29.9327	26.7168	37.6322	36.7954	72.6604	50.0668	26.2088	21.3558	34.8174	37.1017	38.829	17.1617	37.5634	-0.196192	-0.342247
1114	ENSG00000088756.8	<ARHGAP28>	3.63725	4.80102	4.24711	7.01441	4.54847	3.66563	1.7188	1.99875	3.69767	4.5652	3.32622	7.30977	5.76098	1.72706	4.64056	3.1271	4.94684	4.60412	3.75991	1.69017	2.01787	0.0702225	0.0386658
1115	ENSG00000137962.8	<ARHGAP29>	15.2343	11.5519	10.5897	11.6964	29.1723	34.8933	3.78876	19.3932	14.236	10.3236	12.1725	16.2048	30.1011	13.1868	6.31266	11.1927	9.07869	12.9704	12.984	0.835797	15.1944	-0.000441194	0.282123
1116	ENSG00000186517.9	<ARHGAP30>	7.18665	7.26591	4.54646	6.30605	10.9419	9.61791	7.4851	6.93258	5.13977	2.14426	10.9871	6.35862	3.36657	9.31895	5.09146	3.60379	3.98022	5.28488	9.06595	7.28072	5.41548	0.353818	0.117238
1117	ENSG00000031081.6	<ARHGAP31>	0	0	0	0	0	0	0	0	0	0	0.796169	0	0	0	0	0	0	0	0	0	0	0	-0.296112
1118	ENSG00000134909.14	<ARHGAP32>	13.2312	6.9532	8.51292	11.5755	11.0332	8.81496	1.49702	7.92295	14.3285	13.7821	7.66091	17.1912	4.66279	6.2786	3.43815	2.84108	2.7672	6.84348	8.27532	0.464332	9.65818	0.620864	0.568641
1119	ENSG00000004777.14	<ARHGAP33>	80.8454	32.2827	27.2039	50.2411	44.7357	87.1547	36.2057	39.6148	39.5466	99.1374	59.4296	90.1655	36.3302	46.5767	58.9558	25.7032	26.061	69.4738	57.5231	25.1668	78.2485	-0.443228	0.0457317
1120	ENSG00000160007.13	<ARHGAP35>	2.77626	10.2459	5.08904	2.67791	3.68992	0.820403	11.0521	7.83292	10.4459	9.51083	8.56324	6.48191	2.82648	7.48394	3.13754	2.76481	11.1446	9.58445	10.6472	11.4226	10.0376	-0.380735	-0.240709
1121	ENSG00000147256.6	<ARHGAP36>	0.14057	0.31271	0.0374194	0.103661	0.109602	0.907679	0	0	0.314302	0	0	0.352278	0.0540092	0.395785	0.0375754	0.114406	0.208488	0.107489	0	0	0.275948	-0.00203848	0.168706
1122	ENSG00000147799.7	<ARHGAP39>	149.057	88.2394	30.3659	77.1757	77.0134	56.0667	73.5573	58.99	56.9627	138.806	83.1908	151.092	5.40092	71.5472	71.149	21.8515	41.7165	97.0269	122.636	27.6185	124.504	0.072977	0.104986
1123	ENSG00000089820.11	<ARHGAP4>	104.637	97.2712	59.6466	69.4012	84.9047	78.1826	95.4397	57.1713	72.4005	49.0759	91.8071	62.0185	69.1138	109.255	63.5963	45.7815	65.2756	77.231	101.764	58.803	78.0071	0.122664	0.0755122
1124	ENSG00000124143.6	<ARHGAP40>	0	0	0.0935486	0.155492	0.292271	0	0.147854	0.252094	0	0	0.0353853	0.193753	0	0	0	0	0	0.107489	0	0	0	0.129017	0.493987
1125	ENSG00000165895.13	<ARHGAP42>	19.1878	11.1656	12.442	18.9182	18.0477	15.448	10.9227	11.3082	15.7706	25.9559	13.0925	28.9396	11.4499	10.2185	19.6895	14.4914	16.4516	22.3936	14.618	7.93079	11.6416	0.103755	0.0490348
1126	ENSG00000006740.12	<ARHGAP44>	6.88794	4.46991	8.10131	7.82642	4.2562	5.74282	4.69436	8.82329	5.54651	7.03801	9.09401	10.8149	13.3223	3.5081	5.07268	7.97028	8.24474	9.24407	9.10109	4.88477	7.51958	-0.359622	-0.533147
1127	ENSG00000100852.8	<ARHGAP5>	56.5619	37.0653	48.4956	87.0408	52.4627	50.0795	43.1364	34.1587	54.892	45.773	37.3668	62.5469	28.6969	42.9787	41.765	62.5991	40.2002	63.2215	34.3487	50.2593	30.406	0.23632	0.308961
1128	ENSG00000047648.17	<ARHGAP6>	20.33	18.1924	25.5575	13.5105	26.8341	16.7921	10.4422	24.039	24.1458	9.04393	21.5673	19.8861	64.757	30.6374	15.9507	33.1205	28.6576	12.7196	30.3428	28.3057	30.6992	-0.561203	-0.654878
1129	ENSG00000241484.5	<ARHGAP8>	22.2628	8.25923	11.1136	12.6294	2.52084	18.4852	21.9563	28.6667	25.9207	50.9262	8.59862	12.2769	5.2929	20.9586	9.43142	3.06989	13.9497	27.3202	22.2784	23.2723	26.7842	0.520036	0.28093
1130	ENSG00000123329.13	<ARHGAP9>	27.2355	24.888	34.4072	51.2259	43.9685	42.9577	19.9418	25.0834	16.2328	8.57704	42.8339	25.4521	23.8901	31.285	41.3517	19.1249	26.5348	25.9407	22.5243	29.773	10.6412	0.0118834	0.137148
1131	ENSG00000141522.7	<ARHGDIA>	231.15	340.486	281.563	257.771	287.576	289.916	257.506	240.624	299.992	263.173	227.492	182.797	241.331	237.273	286.569	163.429	249.294	222.861	290.234	255.048	292.833	0.174203	0.650051
1132	ENSG00000111348.4	<ARHGDIB>	7.11636	7.43146	14.7994	5.96052	9.77281	1.23933	7.15243	5.31198	13.515	2.99159	9.16478	7.345	17.0309	6.11668	5.97449	14.7774	13.419	8.45581	5.34118	13.1313	6.39855	-0.23031	-0.374447
1133	ENSG00000242173.4	<ARHGDIG>	1.7747	4.8562	0.299355	2.74702	0.65761	6.23157	1.66336	1.31449	3.4943	2.52469	2.77774	0.915923	0	2.30275	2.78058	0.114406	0.682323	1.61234	1.03661	0.928664	2.58701	0.786075	0.527159
1134	ENSG00000076928.13	<ARHGEF1>	238.671	209.865	217.519	215.149	271.081	223.376	185.279	228.415	200.543	164.676	266.84	257.128	295.556	294.824	182.485	131.414	202.1	207.06	289.759	145.726	252.579	-0.222995	-0.214202
1135	ENSG00000104728.11	<ARHGEF10>	430.812	206.15	205.957	439.195	293.897	265.863	171.307	197.876	233.878	362.069	203.111	335.668	59.0681	261.74	226.223	107.179	147.761	250.145	269.958	184.823	197.941	0.298245	0.610334
1136	ENSG00000074964.12	<ARHGEF10L>	67.6845	66.221	62.4905	101.623	68.5924	65.7195	75.7197	76.4745	51.675	60.9039	92.7271	100.628	174.684	70.036	58.2606	49.9954	72.3263	74.3467	75.7605	40.5455	74.1093	-0.145478	-0.278455
1137	ENSG00000132694.14	<ARHGEF11>	59.7599	52.6825	40.5252	63.7862	62.6921	46.0473	35.5034	47.8618	49.9926	50.6841	50.3532	61.2083	41.7671	60.1774	40.3935	33.3493	40.2192	50.3228	58.5246	22.3994	50.3433	0.000439082	0.308694
1138	ENSG00000196914.4	<ARHGEF12>	42.9793	26.9299	30.6652	43.8832	45.6125	13.3708	5.61845	22.0402	24.7189	21.7884	19.1611	50.0235	20.6495	25.0244	24.9501	25.2647	18.6502	24.5254	16.3925	1.46729	20.127	0.315776	0.306958
1139	ENSG00000198844.6	<ARHGEF15>	12.9852	18.689	24.5659	26.9519	33.3006	38.9429	27.5563	27.5143	18.5253	25.368	36.323	28.4993	99.1969	36.0345	30.887	47.0781	46.7202	25.3495	70.9112	10.1039	41.4267	-0.465933	-0.693758
1140	ENSG00000130762.10	<ARHGEF16>	108.151	42.4182	4.92066	95.4892	32.5882	25.031	95.6984	35.9954	64.5429	177.645	78.5907	89.9189	6.96719	51.9198	122.345	9.34316	34.1162	77.1414	72.2465	51.968	73.2815	-0.430439	0.121449
1141	ENSG00000110237.3	<ARHGEF17>	168.526	99.2946	52.7801	207.357	113.693	98.7625	93.8687	106.132	87.8382	90.9235	102.087	128.282	163.18	124.061	102.13	58.8428	94.0848	100.198	151.047	22.3808	151.616	-0.0442681	0.0496093
1142	ENSG00000104880.13	<ARHGEF18>	12.9676	20.97	9.29873	12.5603	14.5953	12.4806	20.9583	13.0369	18.4699	17.448	16.7726	15.8877	10.4058	14.3562	11.329	10.5063	17.1718	14.7439	13.8449	11.7197	12.5384	-0.00290277	0.367091
1143	ENSG00000142632.12	<ARHGEF19>	16.9914	15.6355	17.0071	14.2189	14.6866	24.6994	14.4712	9.23744	10.7972	8.73267	14.5964	17.5963	19.6053	24.3948	19.3889	32.0909	23.7107	19.2764	22.2256	15.6201	10.5723	-0.399431	-0.715389
1144	ENSG00000116584.13	<ARHGEF2>	230.359	138.567	132.427	230.508	136.472	255.826	177.961	198.092	153.38	363.971	248.493	228.206	225.2	205.61	162.983	138.984	199.617	213.903	340.799	80.3294	203.701	-0.128652	-0.0265625
1145	ENSG00000240771.2	<ARHGEF25>	94.6916	84.726	101.594	103.644	51.7137	175.008	85.6259	122.662	83.6599	109.634	125.582	100.892	120.765	114.562	73.4599	81.2092	73.7288	152.473	80.6975	93.405	148.564	-0.039666	-0.107896
1146	ENSG00000114790.8	<ARHGEF26>	125.178	179.937	71.7705	155.768	163.544	59.8894	124.179	89.4574	103.165	61.1806	29.7236	61.4373	10.8378	97.3992	71.3556	68.1097	38.2859	40.2547	135.128	70.2441	125.246	0.734724	0.778997
1147	ENSG00000214944.5	<ARHGEF28>	71.0582	64.9885	52.7614	50.6212	53.0289	57.9518	53.8927	64.248	71.9013	73.0086	48.6724	78.6108	35.7541	70.7556	53.6013	38.9171	37.1108	57.1305	44.6973	61.719	79.5248	0.187265	0.340932
1148	ENSG00000163947.7	<ARHGEF3>	3.35611	3.05352	6.28646	3.45537	7.78172	13.0043	5.85871	11.7224	6.91465	6.81321	11.5887	14.4786	26.2305	7.08816	9.41263	12.5275	15.7124	6.77182	11.5433	5.25624	6.32956	-0.772566	-0.687699
1149	ENSG00000214694.6	<ARHGEF33>	2.51269	2.81439	1.70258	6.54793	2.75831	1.86773	2.1254	2.23283	0.591628	3.6487	3.25544	2.39549	1.35023	2.08687	2.01028	0.915248	0.833951	3.95918	2.12593	4.21613	2.69049	0.129609	0.17139
1150	ENSG00000213214.3	<ARHGEF35>	0.843421	0.735788	3.4613	0.88112	0.785478	0	1.46006	1.76466	3.82709	0.553357	2.37081	3.32903	2.52043	2.05089	0.995748	1.14406	0	2.02438	1.54613	0.427185	2.22483	-0.889916	-0.163625
1151	ENSG00000183111.7	<ARHGEF37>	2.98712	3.55018	1.72129	14.7544	6.42996	4.90496	3.10493	5.31198	2.2186	11.0671	4.93625	6.32339	1.27822	4.8034	4.15208	1.81143	0	10.5698	7.06301	0.445759	4.41517	-0.0561423	0.274283
1152	ENSG00000236699.4	<ARHGEF38>	0.333854	0.239131	0	0.0691075	0.0730678	0	0	0.558208	0.90593	0	0.0707705	0	0.0180031	0.0359805	0	0.0381353	0	0	0	0.241453	0	0.191784	0.579911
1153	ENSG00000137135.13	<ARHGEF39>	2.47755	3.1271	1.27226	3.90457	1.9911	10.2288	3.88117	3.7634	4.58512	0.933791	2.10542	3.87506	7.0212	2.14084	2.1418	4.30929	3.18418	2.81263	1.84482	1.24441	1.91439	0.578598	0.212092
1154	ENSG00000136002.12	<ARHGEF4>	47.0383	53.1607	95.1763	57.7738	51.1474	52.9072	23.6936	34.807	21.6684	21.287	39.3307	28.3408	7.6333	52.6395	20.3471	13.3092	15.7124	45.4858	26.1613	20.1891	41.0645	0.895388	0.661744
1155	ENSG00000165801.5	<ARHGEF40>	245.541	270.09	100.976	233.773	233.707	152.909	243.811	126.209	158.15	240.313	228.182	275.834	100.907	240.943	259.308	106.016	153.58	229.794	232.078	115.526	175.727	0.0346467	0.0912224
1156	ENSG00000050327.10	<ARHGEF5>	2.14369	2.88797	2.90001	4.181	1.64402	2.86268	5.85871	4.21357	3.45733	2.99159	2.99006	2.36026	3.85266	3.58006	1.54059	3.58472	3.37371	0.788254	2.899	10.1224	3.94951	-0.168878	-0.0874686
1157	ENSG00000129675.11	<ARHGEF6>	54.1371	38.7025	41.0865	47.7187	44.48	51.5108	30.6982	30.6474	36.8103	41.7785	43.0285	73.3795	42.9193	38.2473	26.7725	35.1226	31.5195	60.606	36.5976	29.6429	47.7735	0.113975	-0.0354593
1158	ENSG00000102606.13	<ARHGEF7>	136.371	97.1425	124.382	156.839	109.602	130.2	92.2978	120.735	109.932	150.046	126.378	143.395	187.43	133.596	84.3567	92.3638	95.639	145.881	166.912	72.6401	276.69	-0.123916	-0.256984
1159	ENSG00000131089.9	<ARHGEF9>	14.2152	13.5201	9.78518	7.96463	12.1292	13.8247	10.6824	17.0163	13.552	16.8947	16.7018	11.6604	15.3926	15.0938	6.50054	11.5931	6.82323	20.4229	6.67648	8.97089	17.4537	0.206946	0.0845279
1160	ENSG00000117713.13	<ARID1A>	21.3139	31.179	22.1336	26.6236	25.5189	9.65282	11.4032	26.704	24.3862	15.8744	17.8873	26.9493	26.7706	27.4531	17.4913	20.5359	19.8632	19.7422	17.3413	0	17.8849	0.231163	0.214896
1161	ENSG00000049618.17	<ARID1B>	39.6408	32.9081	37.0452	43.9869	36.7348	40.4092	25.3569	36.2835	34.943	33.409	32.1829	48.7024	41.9651	38.805	25.0064	38.326	30.5719	42.3507	37.1599	20.9692	28.5606	-0.0251451	0.114354
1162	ENSG00000189079.11	<ARID2>	13.5299	10.3194	11.0387	12.9749	10.0286	11.9395	19.5722	15.8099	14.8092	11.7761	14.9503	18.1599	15.7707	18.7818	9.26233	13.252	10.4244	14.4215	13.3178	15.7316	16.7983	-0.253879	-0.347517
1163	ENSG00000116017.6	<ARID3A>	5.48224	4.74584	2.5071	2.22872	3.54379	1.51862	2.34718	3.51131	2.2186	2.68032	1.13233	1.12729	3.5286	6.18864	0.48848	4.65251	9.30613	3.70838	7.16843	0.742931	2.93195	-0.380939	-0.205294
1164	ENSG00000179361.13	<ARID3B>	1.49356	0.735788	1.38452	1.91773	1.51616	0	1.03498	1.63861	1.86733	1.10671	2.60082	3.25857	3.56461	2.60859	1.0709	0.32415	1.93325	3.69046	1.14203	0.315746	4.32894	-0.677307	-0.651922
1165	ENSG00000205143.2	<ARID3C>	0	0	0	0	0	0	0	0	0	0	0	0	0	0	0	0	0	0	0	0	0	0	1
1166	ENSG00000032219.14	<ARID4A>	28.6939	29.6339	36.091	26.7791	26.9803	37.9654	19.2025	29.7651	31.6521	21.4945	18.2588	30.0669	35.16	23.5852	11.1223	30.0125	23.5591	31.2435	15.5492	13.8557	21.6619	0.302124	0.586774
1167	ENSG00000054267.16	<ARID4B>	36.7767	36.0536	45.7827	14.0634	25.4276	49.9573	41.9905	36.3556	32.2067	19.7134	15.8172	33.3959	44.1795	33.6957	16.721	37.7921	20.2612	26.1736	25.1246	23.5695	39.6503	0.460547	0.342216
1168	ENSG00000196843.11	<ARID5A>	61.6224	55.8279	44.5853	46.8203	56.116	54.0768	89.3777	38.1742	48.4026	81.6202	57.4657	67.6021	114.752	50.7325	54.2964	29.574	80.154	55.5002	139.398	43.4243	209.738	-0.0639503	-0.439465
1169	ENSG00000150347.10	<ARID5B>	6.71222	3.80771	7.03485	9.24312	11.9283	2.91505	0.924087	7.36475	3.71616	10.2025	5.9978	10.5507	7.54328	3.04035	2.96846	5.81564	8.73753	5.26697	13.4935	0.11144	38.9259	0.182405	-0.264393
1170	ENSG00000166233.8	<ARIH1>	45.5272	35.6122	46.9988	54.9577	52.1156	71.2528	63.4663	45.557	32.3916	46.6895	37.6676	44.8978	73.9746	64.2072	27.7682	56.5738	38.3617	41.7237	57.3299	56.8714	76.4721	-0.269641	-0.148144
1171	ENSG00000177479.15	<ARIH2>	75.2226	65.1541	55.1188	67.6044	71.6612	65.1958	45.04	64.32	67.7969	48.4534	60.2611	69.6277	61.3004	62.606	40.356	51.9403	56.3485	61.5913	75.7605	18.4247	53.7409	0.112195	0.3786
1172	ENSG00000221883.2	<ARIH2OS>	0	0	0	0	0	0	0	0	0	0	0	0	0	0	0	0	0	0	0	0	0	0	1
1173	ENSG00000120805.9	<ARL1>	14.7423	27.2978	27.1104	33.137	24.569	11.6776	25.2091	12.9108	15.937	26.1807	26.592	15.3593	26.1585	17.4505	24.3864	31.843	20.4318	20.9066	16.2695	19.2233	20.7478	0.256891	0.0131489
1174	ENSG00000175414.6	<ARL10>	13.1257	7.28431	6.24905	6.40972	0.840279	13.2486	3.80724	8.24708	8.745	9.52812	13.3579	12.453	4.96885	13.8165	8.17265	0.800842	10.4623	9.62028	12.1582	4.97764	14.3838	-0.407342	-0.311489
1175	ENSG00000152213.3	<ARL11>	0	0	0	0	0	0	0	0	0	0	2.90159	0	0	0	0	0	0	0	0	0	0	0	-0.300025
1176	ENSG00000174225.10	<ARL13A>	0.333854	0	0.617421	0	0.0913347	0	0	0.468175	0.166395	0.121047	0.0884632	0.616486	0.216037	0	0.225452	0	0.265348	0.0716594	0.263545	0	0.275948	-0.240262	-0.0107056
1177	ENSG00000169379.11	<ARL13B>	16.4467	12.2877	17.7555	10.4525	10.4304	6.28393	18.9807	16.2781	13.552	7.67783	11.0225	9.82855	6.66113	12.0355	31.3003	14.2626	12.4524	13.1316	12.2461	8.58085	12.2797	0.0743134	-0.00739915
1178	ENSG00000179674.2	<ARL14>	0	0	0	0	0	0	0	0	0	0	0	0	0	0	0	0	0	0	0	0	0	0	1
1179	ENSG00000152219.4	<ARL14EP>	8.10035	10.9265	8.53163	11.6446	10.8323	33.1827	12.0501	8.8413	19.2094	16.4105	5.37856	8.85979	8.11938	13.4027	15.1241	11.9364	10.2917	12.4508	20.6619	13.3913	10.7447	-0.0775473	0.246606
1180	ENSG00000185305.6	<ARL15>	5.42952	6.89802	7.61485	8.93214	5.86369	0	4.91614	4.17756	9.89128	6.64029	5.32548	8.84218	17.337	5.10923	11.2538	16.3219	9.9316	7.29135	2.28406	2.916	4.7946	-0.206561	-0.394787
1181	ENSG00000214087.4	<ARL16>	37.1281	49.0035	42.6582	31.2538	42.5985	25.6943	58.5132	35.8334	42.1535	51.4622	40.9938	42.4319	40.3089	61.6526	53.7328	48.5844	44.1804	50.0004	50.2844	39.6539	51.5161	-0.195095	-0.500408
1182	ENSG00000185829.11	<ARL17A>	39.7111	31.8596	24.8465	23.7039	37.7943	35.382	19.0362	29.1709	48.3101	54.523	24.3628	41.4455	34.2238	26.3557	6.97023	21.5083	14.8405	27.9472	22.6825	19.8363	21.179	0.55762	0.741031
1183	ENSG00000228696.4	<ARL17B>	13.0906	10.577	19.5142	16.534	12.933	24.0361	10.7379	11.2722	31.005	17.6729	17.3034	23.5146	21.5677	19.9872	6.53812	12.5275	6.40626	13.9019	8.06448	14.3757	14.2976	0.0493295	0.263039
1184	ENSG00000213465.3	<ARL2>	84.9922	75.5471	60.133	106.961	103.738	75.1978	78.7507	81.9125	113.703	119.698	98.7603	67.8663	60.4363	78.1316	139.236	65.7262	103.277	96.4715	84.8088	153.062	81.146	-0.023124	-0.0978702
1185	ENSG00000102931.3	<ARL2BP>	2.47755	1.52676	0	0	0	0	0	0.900336	0.831977	0	0	1.35627	0	0	1.84119	0.838977	0	0	0	0	1.39699	0	0.071772
1186	ENSG00000138175.8	<ARL3>	0	0	0	0	0	0	0	0	0	0	0	0	0	0	0	0	0	0	0	0	0	0	1
1187	ENSG00000122644.8	<ARL4A>	35.6521	35.6489	62.004	50.6212	50.7821	65.3878	33.6737	40.7852	85.7491	36.6945	23.425	51.4854	76.8011	41.3596	53.9958	111.031	95.0135	54.4791	28.9021	47.9748	28.5951	-0.170114	-0.184208
1188	ENSG00000188042.5	<ARL4C>	6.06209	8.71909	28.8504	7.13534	6.5213	11.8697	5.2673	9.07538	6.41546	6.65758	26.5213	7.62682	11.864	20.0231	8.88658	7.70334	9.04078	16.7683	19.1861	7.83792	6.69174	-0.367272	-0.337857
1189	ENSG00000175906.4	<ARL4D>	0	0	0	0	0	0	0	0	0	0	0	0	0	0	0	0	0	0	0	0	0	0	1
1190	ENSG00000162980.12	<ARL5A>	16.2183	13.7041	16.5207	25.708	21.007	4.04965	17.3174	12.0825	17.3236	8.99206	17.7988	24.2367	20.5775	11.3339	18.4119	20.4024	12.3008	20.6379	19.2212	5.73914	10.8827	-0.164882	-0.146718
1191	ENSG00000165997.4	<ARL5B>	0	0	0	0	0	0	0	0	0	0	0	0	0	0	0	0	0	0	0	0	0	0	1
1192	ENSG00000141748.8	<ARL5C>	0.597423	0.275921	0.0935486	0.155492	0.456674	0	0.351153	0.540201	0.351279	0.103755	0.743091	0.352278	0	0.179902	0.150302	0.228812	0.151627	0.394127	0.105418	0.11144	0.63813	0.25888	0.0510343
1193	ENSG00000113966.5	<ARL6>	9.52363	10.3194	11.6374	13.666	14.2665	4.13692	8.64945	7.61684	14.9386	9.8048	11.0225	14.6019	7.09321	13.6366	9.37506	14.5486	10.4244	9.35156	7.0103	9.1752	7.10566	0.097038	0.0348403
1194	ENSG00000170540.10	<ARL6IP1>	1.2827	1.0485	1.27226	3.88729	1.22388	16.4081	1.68184	0.828309	3.12453	0.50148	1.53926	0.863081	1.83631	1.52917	2.12301	2.82201	1.26988	2.23936	0.368963	1.00296	1.19003	-0.191056	0.33107
1195	ENSG00000182196.9	<ARL6IP4>	481.295	534.293	408.789	426.514	479.964	426.016	529.668	440.282	501.904	523.148	531.469	419.087	399.74	486.384	607.782	312.271	440.819	522.971	442.791	536.155	472.475	0.024661	0.0539187
1196	ENSG00000144746.6	<ARL6IP5>	1.35299	2.18897	0	3.7318	4.4206	0	1.97755	0.468175	1.07233	1.15859	1.84003	4.12165	2.43041	1.90697	0	1.33474	1.06139	4.22791	0	5.25624	1.13829	-0.414409	-0.210494
1197	ENSG00000177917.6	<ARL6IP6>	24.1429	15.8562	40.9743	23.7557	21.9021	64.7071	30.4764	19.0331	30.8941	28.1521	20.7535	21.5594	25.8344	28.7664	25.927	33.0443	34.4005	15.0306	10.3134	32.7261	19.7648	0.0170511	0.349336
1198	ENSG00000143862.3	<ARL8A>	25.4783	16.2057	18.7658	50.7767	14.4309	43.7781	10.4052	14.4234	14.9386	24.8665	26.4505	26.1919	21.2616	12.0535	18.4871	14.5868	11.5995	22.4473	34.0325	9.1752	9.48571	-0.0781609	0.298049
1199	ENSG00000134108.8	<ARL8B>	8.69778	6.69567	15.3607	9.84781	6.97797	25.5023	10.3498	7.99498	19.2464	12.5543	11.9425	11.6252	18.9212	15.8494	6.06842	8.56138	30.0033	3.99501	20.7498	10.6982	10.8482	-0.194105	-0.129803
1200	ENSG00000196503.2	<ARL9>	0	0	0	0	0	0	0	0	0	0	0	0	0	0	0	0	0	0	0	0	0	0	1
1201	ENSG00000104442.5	<ARMC1>	0	0	0.355485	0.483752	1.13255	2.09464	0	0	0	0	0	0.775011	0	0	0.206665	0	0.454882	1.71983	0.983902	0	0.603636	-0.499098	-0.0264508
1202	ENSG00000170632.9	<ARMC10>	62.0793	55.1473	55.8859	74.2041	58.6551	67.0286	68.1237	48.258	61.4184	52.3269	51.5917	53.6343	37.5004	64.4231	77.0483	70.7982	66.5265	69.8321	60.51	73.7916	40.2712	-0.10092	-0.0145795
1203	ENSG00000157343.4	<ARMC12>	0.386568	1.83947	0.598711	0	0.42014	6.47594	0.443562	0	0.573139	1.60819	0.371545	1.63809	0.936159	0	0	0.667368	0	0.752424	0	0.705784	1.93164	-0.211263	0.291692
1204	ENSG00000118690.8	<ARMC2>	6.2378	4.81941	7.67098	7.74003	7.70865	6.8076	6.04353	7.81491	6.93314	10.7905	11.6418	9.61719	8.56946	5.66693	3.30663	5.0148	7.25916	5.3028	7.50225	3.86324	7.89901	0.00795441	0.128009
1205	ENSG00000165309.9	<ARMC3>	0.439282	0.0367894	0.617421	0.207322	0.328805	0.418929	0.0554452	0.144054	0.0369767	0.0691697	0.0884632	0	0.270046	0.881522	0.0375754	0.0762707	0.0947671	0.268723	0.316254	0.185733	0	0.184032	0.106489
1206	ENSG00000169126.11	<ARMC4>	0.667708	1.52676	1.06645	0.846566	0.401873	0.820403	0.591416	1.02638	0.536163	0.743574	1.57464	0.933537	0.774132	0.485737	0.413329	0.209744	1.55418	1.59442	0.263545	2.7117	0.120727	0.00886859	-0.164481
1207	ENSG00000140691.12	<ARMC5>	13.9164	15.4883	9.86002	16.4649	9.44401	14.2261	14.8408	17.4845	16.4546	18.5893	20.0104	10.2865	13.0342	13.7985	15.5562	7.5508	15.1817	11.6805	18.5184	14.5986	15.8498	0.053093	0.1054
1208	ENSG00000105676.9	<ARMC6>	15.9547	27.6656	20.3936	24.5159	30.9625	21.1559	25.2276	19.1411	31.2638	23.6906	27.1936	26.5794	17.913	34.8831	37.782	22.9384	26.8949	22.2503	41.0076	21.1178	21.9206	-0.138346	-0.369379
1209	ENSG00000125449.2	<ARMC7>	3.77782	7.44986	9.22389	2.7643	4.40233	5.34134	9.53658	5.99624	6.89616	5.75838	5.18394	4.38586	6.64313	4.92933	5.48601	5.072	7.58137	7.50633	4.40999	5.40482	6.67449	0.111053	0.145319
1210	ENSG00000114098.13	<ARMC8>	86.9602	54.2828	74.3898	42.3456	69.7066	62.2633	55.704	55.5687	55.5021	47.9	44.5324	55.8537	84.8484	135.323	37.782	81.3617	46.1705	41.1504	75.3036	48.0676	71.4016	-0.00557455	-0.163325
1211	ENSG00000135931.13	<ARMC9>	3.46154	5.97828	10.7768	7.37722	6.6309	8.02947	10.4607	7.85093	7.26593	6.27715	5.20163	8.82456	2.05235	4.58751	6.03085	6.67368	7.65718	7.16594	7.08058	3.67751	5.53621	0.260189	0.53881
1212	ENSG00000126947.7	<ARMCX1>	0	0	0	0	0	0	0	0	0	0	0	0	0	0	0	0	0	0	0	0	0	0	1
1213	ENSG00000184867.9	<ARMCX2>	57.6513	45.4165	57.1021	93.8134	68.6472	62.3855	60.1581	50.0407	47.7	77.7294	57.3241	86.9422	41.299	60.0514	59.5194	57.8894	35.0828	83.6087	50.1439	54.4011	33.6657	0.0389051	0.251932
1214	ENSG00000102401.15	<ARMCX3>	91.1422	82.022	99.7976	77.7632	113.785	94.8001	75.5349	75.3401	88.5778	74.0288	80.183	109.382	84.9025	84.4102	80.7871	96.5777	72.2505	103.279	64.4632	36.6265	63.2438	0.0779501	0.315341
1215	ENSG00000196440.7	<ARMCX4>	45.3866	31.5653	28.2143	37.7845	32.2594	36.0628	31.0678	31.3497	29.5629	52.4998	42.8339	56.3821	34.8719	34.0196	31.0561	25.5507	22.2703	41.0071	36.7733	21.7493	49.4119	-0.126061	-0.0310615
1216	ENSG00000125962.10	<ARMCX5>	14.1097	14.3847	15.8284	9.79598	12.111	15.8146	12.9003	10.4619	14.1806	8.8883	11.9071	12.5059	15.8427	11.7836	9.16839	15.5592	10.6518	13.1495	9.1538	11.8126	12.9523	0.17477	0.189259
1217	ENSG00000198960.6	<ARMCX6>	70.3905	48.0654	68.4963	27.0556	48.5535	65.8242	74.5923	36.5716	58.793	63.5842	57.1295	77.0608	40.7229	35.7646	75.038	50.453	69.5022	68.2377	26.987	42.9228	52.5854	0.21669	0.0861855
1218	ENSG00000254636.1	<ARMS2>	0	0	0	0	0	0	0	0	0	0	0	0	0	0	0	0	0	0	0	0	0	0	1
1219	ENSG00000143437.16	<ARNT>	82.6904	71.5738	69.4692	82.4625	92.7961	96.406	51.3792	77.753	73.1215	83.4186	76.9807	98.0918	87.0448	74.6955	46.0862	79.4168	74.2785	81.6022	93.4004	43.4243	53.6891	0.0570821	0.205481
1220	ENSG00000172379.14	<ARNT2>	0	0	0.411614	0	0	0.209464	0.147854	0	0.295814	0.518773	0	0	0.270046	0	0	0	0.113721	0	0	0.241453	0.569143	0.198939	0.188868
1221	ENSG00000133794.13	<ARNTL>	39.7286	55.6808	39.4962	55.5106	62.4912	56.0841	47.7938	55.1726	56.6853	38.7523	31.0506	68.9936	55.7195	65.8623	46.8753	63.8767	38.5892	29.3266	45.0838	38.0009	39.9952	0.292818	0.191975
1222	ENSG00000029153.10	<ARNTL2>	2.24912	0.698999	1.77742	1.62403	1.82669	6.42358	0.998014	1.15243	1.51605	1.08942	1.96388	1.3915	5.04086	1.43922	0.619994	4.08048	5.09847	1.54068	2.56517	0.482905	2.69049	-0.251278	-0.219698
1223	ENSG00000241685.4	<ARPC1A>	12.6337	20.3629	11.5626	37.4908	21.8107	7.29635	21.4019	17.9527	26.235	49.5428	31.2452	15.3065	12.008	20.8507	25.927	16.3601	15.8072	17.4491	14.6355	34.9178	24.5766	0.252514	0.122871
1224	ENSG00000130429.8	<ARPC1B>	96.9583	173.021	102.492	110.365	165.151	126.761	149.961	107.212	128.624	88.5199	121.177	159.511	71.7962	175.225	178.276	82.9825	137.981	165.963	175.539	61.4404	88.6483	-0.217965	-0.0748072
1225	ENSG00000163466.11	<ARPC2>	398.551	492.169	442.915	307.373	441.439	605.946	550.331	393.825	424.77	351.901	473.791	411.672	480.574	442.542	464.018	512.958	429.996	472.702	428.261	608.999	517.851	-0.126075	-0.340074
1226	ENSG00000111229.11	<ARPC3>	38.0769	30.6824	39.4027	46.8376	34.1044	78.8634	52.0076	34.3388	28.5645	36.2622	30.7144	31.5113	38.8146	37.6176	36.4105	43.1501	28.0511	24.1671	43.1687	24.3124	55.3966	0.0293665	0.351943
1227	ENSG00000241553.8	<ARPC4>	67.3858	99.5522	115.364	62.0412	125.238	129.536	107.379	94.8053	93.4402	68.2359	76.2376	53.4758	95.8663	136.924	130.368	192.316	123.14	79.9719	74.9171	27.3956	54.1548	0.279559	0.0249241
1228	ENSG00000250151.5	<ARPC4-TTLL3>	53.8032	41.5537	44.5291	53.5583	53.2847	41.5263	14.0646	29.6751	31.2453	41.2424	58.2442	58.4253	40.0388	50.8404	34.0997	21.2795	41.5649	47.6535	52.5509	9.43522	51.999	-0.195879	-0.0963062
1229	ENSG00000162704.11	<ARPC5>	201.086	205.322	307.457	255.11	224.702	210.32	282.327	193.986	340.094	209.428	203.625	195.285	190.148	232.902	302.576	305.216	267.679	243.373	142.964	302.633	200.011	-0.098416	0.105482
1230	ENSG00000136950.9	<ARPC5L>	9.33034	13.6305	6.09937	8.05102	8.36626	11.4158	17.4098	8.33711	9.48453	10.8251	8.98786	7.69727	8.31742	6.85428	4.20844	5.54869	8.03625	8.0796	9.71603	6.33349	15.0909	0.214909	0.516082
1231	ENSG00000128989.6	<ARPP19>	93.3737	72.3832	110.743	114.027	68.1357	115.397	106.677	74.3317	93.4217	89.4018	66.4535	98.6378	75.0908	86.9109	86.6676	105.501	68.0807	89.5385	78.0972	87.3687	89.7866	0.103277	0.42208
1232	ENSG00000172995.12	<ARPP21>	0.96642	0.31271	0.0374194	0.984781	0.401873	14.8371	0.369635	0.10804	0.11093	0.708989	1.34464	1.63809	0.0540092	1.02544	1.20241	0	0.814997	1.39736	0.54466	0.0371465	0.275948	-0.570082	0.244747
1233	ENSG00000120500.13	<ARR3>	0.333854	0.864551	0	0	0	0	0	0.0900336	0	0	0.654627	1.09206	0	0	0.469692	0	0	0	0	0	0	0	-0.153328
1234	ENSG00000137486.12	<ARRB1>	8.45178	20.0318	18.2233	14.9618	15.1068	10.3859	18.4633	18.691	23.1659	11.3784	28.1844	14.3025	32.4235	13.8705	21.3804	24.1778	27.5772	28.3055	21.1188	10.0667	21.8171	-0.378682	-0.738238
1235	ENSG00000141480.13	<ARRB2>	143.136	146.532	215.405	195.816	112.269	120.826	115.917	122.896	81.5337	86.2719	204.615	131.576	87.6029	167.273	117.761	72.3237	111.598	182.32	138.238	114.894	98.1685	0.049166	0.0739064
1236	ENSG00000197070.9	<ARRDC1>	48.3034	50.8982	40.3381	47.2177	38.1414	59.645	40.9925	49.0503	49.9371	48.4879	55.1126	40.7409	65.0271	58.5043	32.3524	37.0866	39.3663	46.6324	50.056	25.7054	47.5493	0.0529883	0.152349
1237	ENSG00000105643.5	<ARRDC2>	30.5564	70.415	76.9156	35.4867	33.6294	32.2052	38.3496	72.0269	44.7234	38.0952	39.6669	50.9218	87.2789	51.0383	27.1482	27.5146	52.2546	32.1034	39.7602	17.1617	33.5967	-0.0528382	0.211717
1238	ENSG00000113369.4	<ARRDC3>	29.5022	11.6255	13.602	25.3452	33.0449	15.9368	6.67191	11.1281	11.8326	13.4016	19.285	31.159	8.29941	33.6957	13.1514	21.1079	16.679	24.8479	14.3369	0.947237	23.8868	-0.498793	-0.125662
1239	ENSG00000140450.7	<ARRDC4>	0	0	0.879357	0	0	0	0	0	0	0	0	0	0	0	0	0	0	0	0	0	0	0	0.318678
1240	ENSG00000205784.2	<ARRDC5>	0	0	0	0	0	0	0	0	0	0	0	0	0	0	0	0	0	0	0	0	0	0	1
1241	ENSG00000100299.13	<ARSA>	83.5689	82.5923	76.2608	70.075	101.254	77.3273	98.8958	91.186	115.016	93.1715	107.925	104.715	101.321	116.991	79.904	50.4912	66.4886	83.0712	94.0329	98.7912	83.4225	-0.105323	-0.0338711
1242	ENSG00000113273.11	<ARSB>	0.913706	3.05352	1.32839	2.0905	1.51616	1.32661	1.58943	1.42253	0.887442	1.29693	1.46849	3.78699	1.99834	3.05834	0.676357	0.57203	2.53976	1.02115	3.16254	1.24441	1.25901	-0.0698438	-0.273942
1243	ENSG00000006756.11	<ARSD>	24.4592	25.2559	27.4097	13.666	16.495	29.7789	25.2091	22.8145	35.8674	18.5202	17.1972	29.697	24.7182	20.1131	13.0387	18.3431	22.5925	22.1249	15.9357	19.2419	21.455	0.297522	0.446277
1244	ENSG00000157399.10	<ARSE>	3.25068	2.4465	3.19936	3.67997	4.60327	0	6.46861	2.44891	7.28442	7.0726	2.12312	6.69328	0.792135	4.29967	10.4647	3.1271	1.9522	6.01939	1.89753	2.37738	3.39761	0.128625	0.0339875
1245	ENSG00000062096.10	<ARSF>	0	0	0	0	0	0.174554	0	0	0.0369767	0.0691697	0	0	0	0	0	0	0	0	0	0	0	0	0.505468
1246	ENSG00000141337.8	<ARSG>	3.63725	2.81439	2.6942	1.57219	3.74472	0.610938	1.79273	2.34087	1.40512	1.33152	3.45006	5.26656	0.522089	3.52609	0.394541	1.08686	2.02802	5.57152	0.702787	0.891517	1.20727	0.588278	-0.0208761
1247	ENSG00000205667.2	<ARSH>	0	0	0	0	0	0	0	0	0	0	0	0	0	0	0	0	0	0	0	0	0	0	1
1248	ENSG00000183876.8	<ARSI>	0	0	1.30968	0	0	0	0	0	0	0	0	0	0	1.6551	0	0.838977	1.13721	0	0	0	0	0	-0.273017
1249	ENSG00000180801.11	<ARSJ>	1.49356	1.19566	1.08516	1.46853	0.785478	0.436384	1.5155	0.486181	2.34802	2.17884	0.176926	3.38187	0.828141	0.971473	0.73272	1.43007	0.549649	1.75566	0.948763	0.538625	2.41455	0.338673	0.0456891
1250	ENSG00000164291.12	<ARSK>	2.54783	4.41473	4.88324	1.00206	1.66229	0.994956	4.74981	2.64699	2.2186	1.53903	0.513086	1.09206	2.61044	5.19918	0.563631	3.60379	1.78162	1.4511	1.65155	1.72731	3.25964	0.372375	0.258241
1251	ENSG00000129744.2	<ART1>	0	0	0	0	0	0	1.73728	0	0	0	0	0	0	0	0	0	0	0	0	0	0	0	0.31747
1252	ENSG00000156219.12	<ART3>	32.1378	10.1171	20.8426	211.296	154.758	34.9631	16.3194	9.70562	8.09791	55.768	13.1279	39.5784	8.69548	40.7479	81.0313	16.6079	19.5031	38.5886	37.7924	18.2761	38.5637	-0.50462	0.31994
1253	ENSG00000111339.6	<ART4>	0.263569	0.478262	1.74	0.172769	0.675877	0	1.05346	0.504188	0.702558	0	1.46849	1.76139	9.21757	0.125932	0	0	0	1.02115	0	0.297172	0.137974	0.635715	-0.258846
1254	ENSG00000167311.9	<ART5>	0.175713	0.183947	2.91872	0.397368	0	0.820403	3.4376	0.396148	0.739535	0.674404	0	0.457961	0	0.233873	0	1.01059	0.0379069	1.03906	0.140557	0.241453	0.189714	0.586795	0.533372
1255	ENSG00000117407.12	<ARTN>	10.9118	3.93647	12.7787	8.67299	1.37002	0.523661	1.86666	2.9531	3.06907	5.94859	8.45708	7.08079	1.72829	5.82884	0.807871	5.11013	1.80058	4.12042	12.9313	1.35585	2.17309	-0.207025	0.094199
1256	ENSG00000173409.9	<ARV1>	7.20422	8.13046	4.82711	3.26533	7.03277	20.8941	6.35772	4.80779	4.12291	3.94267	6.21011	8.8774	4.7168	5.57698	8.05992	7.51266	5.55335	6.19854	9.62818	8.02365	2.56977	-0.139324	0.0779754
1257	ENSG00000099889.9	<ARVCF>	232.45	157.017	35.5859	120.264	88.3389	71.5845	155.783	101.756	178.172	235.748	177.457	188.416	64.865	112.421	134.351	42.1395	104.339	193.194	147.058	45.5231	132.921	0.0541469	0.182029
1258	ENSG00000004848.6	<ARX>	0	0	0	0	0	0	0	0	0	0	0	0	0	0	0	0	0	0	0	0	0	0	1
1259	ENSG00000214435.3	<AS3MT>	0	0	0	0	0	0	0	0	0	0	0	0	0	0	0	0	0	0	0	0	0	0	1
1260	ENSG00000104763.13	<ASAH1>	179.807	139.285	327.476	138.301	120.781	230.341	228.785	187.666	212.006	168.428	166.576	165.13	137.093	181.701	174.688	207.494	120.733	187.873	132.423	183.244	154.824	0.141052	0.432715
1261	ENSG00000188611.10	<ASAH2>	0.579852	0.367894	1.55291	1.57219	1.49789	3.2467	2.23629	0.522195	0.831977	1.00296	0.353853	0.510803	1.85432	1.58314	0.375754	0.705504	0.871858	1.54068	0.966332	0.297172	0.776104	0.455959	0.429593
1262	ENSG00000204147.5	<ASAH2B>	3.11011	2.7776	3.98517	3.33443	2.2651	6.0221	3.75179	3.72739	4.54814	2.21343	2.97236	3.66369	4.21272	3.38217	1.48423	6.04445	2.99464	4.13833	4.51541	2.86028	4.5014	-0.0467565	-0.0802663
1263	ENSG00000072444.10	<ASAH2C>	0	0	0	0	0	0	0	0	0	0	0	0	0	0	0	0	0.208488	0	0	0	0	0	-0.281131
1264	ENSG00000153317.10	<ASAP1>	25.7419	35.9617	27.1852	31.7722	26.2861	71.759	37.481	43.2161	33.9446	14.0933	27.1936	36.1261	55.1974	38.5171	39.5857	47.5357	50.7762	37.8899	37.5113	30.2744	68.6248	-0.226057	-0.40794
1265	ENSG00000151693.5	<ASAP2>	19.469	11.9566	11.9555	27.6775	16.7143	18.8343	11.3293	14.9276	8.745	21.1486	23.7789	26.2271	26.5005	24.8805	11.0096	12.966	13.0589	23.7909	16.779	18.1461	15.4358	-0.192152	-0.37375
1266	ENSG00000088280.14	<ASAP3>	74.2386	55.7912	51.2833	60.2617	73.013	68.9487	63.0597	62.1412	73.0291	61.6129	118.275	71.5124	80.5097	85.0399	68.3496	76.7855	71.0943	89.2518	83.6317	69.8355	70.1943	-0.292548	-0.979827
1267	ENSG00000065802.7	<ASB1>	33.2624	39.567	29.4678	35.1239	30.5241	19.9515	53.9482	46.0432	35.3313	43.8709	35.9337	37.9403	22.7199	35.3868	31.3754	29.5358	36.5801	33.2142	41.5699	50.8908	53.2925	-0.0282374	-0.0321472
1268	ENSG00000146926.6	<ASB10>	0.0702851	0	0	0.0691075	0	0.628393	0.31419	0.522195	0.314302	0	0.212312	0.457961	2.50243	0	0	0.190677	0.246395	0	0	0	0.155221	-0.201788	-0.194076
1269	ENSG00000165192.9	<ASB11>	0	0	0	0.0345537	0.109602	0.645849	0.0369635	0.0540201	0.0924418	0	0.123848	0.193753	0.324055	0	0	0.0190677	0.322208	0	0.140557	0	0.0517403	-0.0424062	-0.0362032
1270	ENSG00000198881.8	<ASB12>	0.808278	0.790973	0.748389	0.259153	0	0	0.517489	0.10804	0.314302	0	0.60155	0.31705	1.85432	1.27731	0.864234	0	0.227441	0.465786	0.913623	0.575771	0.914078	-0.485598	-0.599109
1271	ENSG00000196372.8	<ASB13>	11.6497	16.077	16.2026	5.25217	10.5948	13.9468	16.153	20.4376	12.3133	15.8917	13.1102	3.31141	30.4252	9.44488	11.3102	26.3706	14.9353	14.1169	16.9372	48.4948	6.29507	0.0770978	-0.28348
1272	ENSG00000239388.4	<ASB14>	0.210855	0.202342	0	0.172769	0	0	0	0	0.0184884	0	0	0.863081	2.88049	0	0	0	0	0	0.228406	0	0	0	-0.340032
1273	ENSG00000146809.8	<ASB15>	0	0	0	0	0	0	0	0	0	0	0	0.0704556	0	0	0	0	0	0	0	0	0	0	-0.242998
1274	ENSG00000161664.2	<ASB16>	0.632566	0	0.67355	0	1.37002	4.13692	0.31419	0.234087	0	0.311264	1.75157	0	1.13419	0.881522	0	0.705504	0	0	0	0.538625	1.37974	-0.353833	0.132652
1275	ENSG00000154007.6	<ASB17>	0	0	0	0	0	0	0	0	0	0	0	0	0	0	0	0	0	0	0	0	0	0	1
1276	ENSG00000182177.9	<ASB18>	0	0	0	0	0	0	0	0	0	0	0	0.40512	0	0	0	0.0190677	0	0	0	0	0	0	-0.306113
1277	ENSG00000100628.7	<ASB2>	1.35299	2.20737	2.65678	3.55903	2.0459	1.41389	4.0475	1.71064	2.82872	1.57361	5.5201	9.19445	17.625	3.11231	4.45268	5.52962	4.87103	3.33216	0.948763	1.09582	3.15616	-0.914996	-0.632071
1278	ENSG00000270898.1	<ASB3>	0	0	0	0	0	0	0.702306	0	0	0	0	0	0	0	0	0	0	0	0	0	0	0	0.319293
1279	ENSG00000005981.8	<ASB4>	1.00156	0.220737	0.860647	1.01933	0.328805	2.70558	0.129372	0.10804	0.129419	0.639819	0.424623	1.42673	0.23404	0.521717	0.845446	0.419489	0.360115	0.537446	0.896054	0.185733	0.879584	-0.0538079	0.118659
1280	ENSG00000164122.4	<ASB5>	0	0.128763	0.149678	0	0	0.349107	0.11089	0.0900336	0.0369767	0	0	0.193753	0.288049	0	0	0	0	0.232893	0	0	0	0.172501	0.142427
1281	ENSG00000148331.7	<ASB6>	0	0	1.88968	0.293707	0.602809	0	2.21781	1.63861	0	4.89375	0	0	0	2.0329	0.507268	0	2.06592	0	0	6.12918	2.19034	0.923351	-0.0082928
1282	ENSG00000183475.8	<ASB7>	0.527138	0.827762	0.954196	0.155492	0.89508	0	0.258744	0.10804	0.166395	0.121047	0	0.422734	0.540092	0	0.469692	1.86863	0	0.107489	0.685217	0.260026	0.655377	-0.372883	-0.08143
1283	ENSG00000177981.6	<ASB8>	11.3862	14.5686	16.7078	15.411	20.6964	10.4209	18.2415	12.3886	11.204	13.6264	9.62479	29.8732	16.2928	11.4958	17.7356	16.4935	17.2476	17.6103	12.4393	2.30309	37.0805	-0.219263	-0.263748
1284	ENSG00000102048.11	<ASB9>	0.896135	2.99834	1.79613	1.31304	2.28337	0.907679	1.34917	2.61097	1.23872	2.33448	3.76853	4.63246	4.64479	1.00745	1.80362	2.91735	4.30243	2.99178	0.966332	0.538625	0.344935	-0.721403	-0.417384
1285	ENSG00000138303.13	<ASCC1>	49.3401	64.8046	60.0021	55.8043	64.0439	58.9992	61.766	48.294	65.5043	43.1965	40.1269	50.182	47.24	57.9286	46.3868	77.3194	49.1462	54.9449	34.173	59.6945	55.3448	0.243504	0.373792
1286	ENSG00000100325.10	<ASCC2>	54.9981	68.9986	39.702	27.7466	45.9596	47.8626	47.3317	60.6826	56.1862	47.5714	54.1041	51.3445	69.8339	67.0137	34.8136	54.6861	49.6201	51.0215	78.0094	42.0313	97.9616	-0.179466	-0.444845
1287	ENSG00000112249.9	<ASCC3>	25.9528	22.368	27.4846	27.9712	34.7437	13.5628	24.6731	21.2299	24.9038	19.7306	21.5496	31.7755	19.8034	27.597	22.6392	32.6438	19.4652	21.7845	29.8157	19.2791	16.6949	0.182441	0.0442053
1288	ENSG00000139352.3	<ASCL1>	0	0	0	0	0	0	0	0	0	0	0	0	0	0	0	0	0	0	0	0	0	0	1
1289	ENSG00000183734.4	<ASCL2>	0	0	0	0	0	0	0	0	0	0	0	0	0	0	0	0	0	0	0	0	0	0	1
1290	ENSG00000176009.2	<ASCL3>	0.562281	0.275921	0.710969	0	0.584542	0	0	0.468175	0.258837	0.743574	0	0.352278	0	0.251863	0.225452	0.209744	0.208488	0	0.843345	0	0.275948	0.297107	0.380441
1291	ENSG00000187855.5	<ASCL4>	0	0	0	0	0	0	0	0	0	0	0	0	0	0	0	0	0	0	0	0	0	0	1
1292	ENSG00000232237.2	<ASCL5>	0	0.0367894	0	0	0	0.45384	0.0554452	0	0.203372	0.190217	0	0	0	0	0	0.133474	0	0.376212	0	0	0	0.0521229	0.255829
1293	ENSG00000111875.7	<ASF1A>	0.737993	0.183947	2.65678	1.6413	0	0	0.794715	0	1.05384	0.674404	0	1.00399	0	0	0	0	0.72023	1.18238	0	0	0	1.27047	0.526158
1294	ENSG00000105011.4	<ASF1B>	0.175713	1.12208	0	0.0345537	0.493207	1.20442	0	0.0180067	0.462209	0.518773	0	0.669328	0.612104	0	0.206665	0	0	0.197063	0.808205	0	0.0172468	0.662942	0.3183
1295	ENSG00000141505.7	<ASGR1>	2.65326	2.33613	1.83355	0.88112	3.39765	2.37393	2.43959	2.26885	1.29419	1.60819	1.09694	1.49718	1.87232	4.10178	2.96846	1.48728	3.56324	2.74097	1.31773	0.817224	2.19034	0.24041	-0.0315563
1296	ENSG00000161944.12	<ASGR2>	0.439282	2.48329	0.205807	0.172769	0.493207	0.0174554	1.14587	0.468175	0.979884	2.16155	1.61003	0.264208	0.126021	0.143922	0.112726	1.54448	0.758137	0.125404	1.08932	0.575771	0.534649	-0.0772714	0.227072
1297	ENSG00000116539.6	<ASH1L>	17.0441	10.0067	9.01808	18.5899	13.1157	10.6129	4.56499	12.9288	7.7836	12.3295	9.27094	15.923	9.36159	11.7656	8.6987	9.36222	8.8323	11.4834	12.3866	2.6374	7.88177	0.279673	0.341444
1298	ENSG00000129691.11	<ASH2L>	35.7048	37.7643	39.7769	36.3332	38.7442	47.915	38.3126	32.178	47.5151	34.7405	32.2891	40.512	44.7196	55.6798	40.3184	50.2814	39.5368	52.2935	38.6709	29.1043	26.9567	-0.0829189	-0.192181
1299	ENSG00000110881.7	<ASIC1>	2.63569	2.81439	3.72323	4.181	1.38829	4.10201	2.90163	2.73702	2.79174	4.27123	10.5448	7.39784	2.01634	3.75996	4.65935	1.73516	2.63453	9.56654	2.81115	2.58168	4.46691	-0.343233	-0.495515
1300	ENSG00000108684.10	<ASIC2>	0.228426	0	0	0.32826	0	0.925135	0.924087	0.234087	0	0.587942	0	1.33866	0	0.575688	0	0	0.113721	1.41527	0.105418	1.393	0.137974	0.252796	-0.192424
1301	ENSG00000213199.3	<ASIC3>	32.0676	22.5335	12.8162	38.441	23.3269	17.9092	27.6117	22.3283	22.8516	28.5498	24.5928	33.8187	8.42543	31.1411	20.3846	8.54231	10.0643	17.879	32.539	17.3103	35.7008	0.175687	0.236434
1302	ENSG00000072182.8	<ASIC4>	0.597423	0.62542	0.710969	1.10572	0.200936	1.83281	0.480525	0.414154	0	5.06668	0.920017	0.264208	0.558095	2.32074	0.281815	0.228812	0.966625	0.734509	0.913623	0.371465	0.482909	0.070937	0.233556
1303	ENSG00000256394.2	<ASIC5>	0	0	0	0	0	0	0	0	0	0	0	0	0	0	0	0	0	0	0	0	0	0	1
1304	ENSG00000101440.5	<ASIP>	2.07341	4.81941	8.73744	0.501029	1.37002	3.89255	3.10493	4.71776	2.81023	3.28556	5.32548	7.39784	0	2.78849	0.73272	6.27326	1.23197	4.01293	0.54466	3.43606	8.7441	-0.0910803	-0.0396376
1305	ENSG00000126522.12	<ASL>	71.3745	133.766	98.6189	72.5455	94.367	95.5507	95.107	99.8652	125.906	75.2566	72.6813	73.6789	95.2722	121.254	73.5538	86.4909	93.0424	55.769	80.2232	121.636	62.554	0.247478	0.371244
1306	ENSG00000196433.7	<ASMT>	1.84498	1.80268	1.55291	0.967504	0.621076	0.960046	4.52803	2.19682	0.758023	1.60819	0.530779	0.898309	0.738126	1.15138	0.150302	0.114406	0.0947671	1.63025	1.01904	1.30013	0.845091	0.629262	0.739239
1307	ENSGR0000196433.7	<ASMT>	0	0	0	0	0	0	0	0	0	0	0	0	0	0	0	0	0	0	0	0	0	0	1
1308	ENSG00000169093.10	<ASMTL>	18.3093	31.0319	20.5807	12.4393	11.7274	5.96974	35.8915	14.2793	30.931	21.0795	22.8058	23.4969	23.206	31.339	13.3393	19.9066	18.7828	36.1164	21.804	36.3107	34.2176	-0.249224	-0.430859
1309	ENSGR0000169093.10	<ASMTL>	0	0	0	0	0	0	0	0	0	0	0	0	0	0	0	0	0	0	0	0	0	0	1
1310	ENSG00000198356.7	<ASNA1>	0	3.43981	1.16	3.23077	0.803745	1.98991	2.97556	1.53057	1.36814	3.12993	0.743091	1.37388	1.40424	2.15883	0.394541	2.34532	4.45406	1.28987	0	2.65598	0	0.270445	0.244748
1311	ENSG00000070669.12	<ASNS>	64.961	47.7527	35.7168	89.9433	56.9746	70.1706	89.544	53.4979	67.1867	72.8184	55.5018	54.0923	37.1403	61.2208	57.3212	47.8217	39.6127	52.5443	244.851	49.2377	52.1369	0.327758	-0.0562883
1312	ENSG00000138381.5	<ASNSD1>	3.00469	5.94149	6.88518	5.61498	6.37516	22.692	5.61845	4.21357	11.093	7.17635	7.89092	7.48591	1.38624	11.4598	13.5647	21.2414	9.21137	6.80765	10.5594	3.4732	2.89745	-0.333668	-0.108792
1313	ENSG00000108381.6	<ASPA>	27.9207	6.6037	20.5807	23.341	11.7091	21.2606	11.3108	3.40327	6.06419	1.38339	3.04313	27.1782	0	2.78849	15.2744	11.0592	4.6815	12.7733	0.773066	4.51331	2.15584	1.2604	0.459698
1314	ENSG00000204653.5	<ASPDH>	0.931277	0	0.374194	0.27643	0	0.71567	0.73927	1.18844	0.314302	1.53903	0.849246	1.2682	1.67428	1.00745	0	0	1.3836	1.37944	1.3353	0	1.93164	-0.758872	-0.43601
1315	ENSG00000166183.11	<ASPG>	7.90707	6.10704	2.54452	3.47265	1.62576	2.5834	2.69833	5.45603	2.44046	5.44711	10.474	12.3473	2.03435	9.71473	5.37328	2.74574	6.70951	9.65611	3.05712	2.86028	16.0222	-1.00773	-0.659416
1316	ENSG00000198363.11	<ASPH>	89.7892	81.0287	86.3266	155.976	126.791	86.7707	74.7401	114.757	115.589	76.6227	81.2977	121.201	122.223	128.414	97.0196	171.895	98.7284	115.049	143.316	165.432	104.826	-0.455038	-0.562775
1317	ENSG00000174939.6	<ASPHD1>	6.94065	9.89635	5.91227	5.56315	5.62622	0.576027	10.4422	7.07664	10.4459	12.2603	5.0424	3.6813	0.88215	6.33257	11.2163	5.58683	8.98392	4.44289	6.92245	8.43227	1.75917	0.302862	0.374913
1318	ENSG00000128203.6	<ASPHD2>	0	0	0	0	0	0	0	0	0	0	0	0	0	0	0	0	0	0	0	0	0	0	1
1319	ENSG00000066279.12	<ASPM>	0.175713	0.0919736	0.130968	0.120938	0.182669	0.209464	0.0554452	0.16206	0.166395	0.242094	0.159234	0.352278	0.0900153	0.323824	0.0563631	1.63982	0.0758137	0.322467	0.052709	0.130013	0.413922	0.0108883	-0.379139
1320	ENSG00000106819.7	<ASPN>	7.62593	8.71909	10.2716	3.64542	8.14706	24.6994	9.18542	15.8999	8.28279	5.39523	70.5759	66.1226	16.1487	10.7402	12.0053	31.6333	15.5418	67.0016	20.2578	21.4336	124.625	-1.28499	-0.852466
1321	ENSG00000244617.1	<ASPRV1>	0	0	0	0	0	0	0	0	0	0	0	0	0	0	0	0	0	0	0	0	0	0	1
1322	ENSG00000169696.11	<ASPSCR1>	54.3831	78.1591	50.6846	54.7504	75.2233	51.2839	103.923	84.0013	81.9589	69.8268	73.6191	60.0634	77.8993	86.677	94.6336	48.9467	71.6819	57.6679	78.4135	87.8516	74.0058	-0.0289623	-0.149788
1323	ENSG00000162174.8	<ASRGL1>	13.6704	12.2877	22.8071	7.74003	17.0796	9.18153	10.2389	9.00336	12.72	8.50787	13.0041	11.6604	24.1961	15.2197	16.1011	17.0084	17.3992	3.18885	27.5844	4.77333	41.168	-0.496985	-0.435688
1324	ENSG00000130707.13	<ASS1>	6.32566	39.3831	24.3226	13.9943	35.2917	20.1959	21.6791	47.6998	30.9495	7.40115	26.362	19.9918	36.8343	25.9599	9.65687	64.3724	19.5978	31.9959	10.3134	45.2073	15.9877	-0.171096	-0.146811
1325	ENSG00000034533.7	<ASTE1>	2.6884	6.45654	6.43614	2.86796	3.96393	7.50581	1.21979	3.94347	3.38337	4.59978	1.61003	5.54838	2.62845	5.18119	2.36725	2.19278	2.78615	5.03408	4.21672	2.45167	3.60457	0.438604	0.370161
1326	ENSG00000188886.3	<ASTL>	0.28114	0	0	0	0	0	0.277226	0	0	0	0	0	0.216037	0	0	0	0	0.161234	0	0	0	0	0.158929
1327	ENSG00000152092.11	<ASTN1>	0.122999	0.62542	0.168387	0.0172769	0.0365339	1.65826	0.11089	0.216081	0.314302	0.172924	0.0884632	0.299436	0.108018	0.143922	0.338178	0.209744	0.132674	0.107489	0.0175697	0.167159	0.137974	0.0720748	0.370285
1328	ENSG00000148219.12	<ASTN2>	26.3569	22.791	13.0781	63.2506	51.5676	10.6652	26.6322	9.93971	24.9223	33.8758	18.7896	78.2938	2.12436	17.5045	41.239	12.0508	18.1384	43.6585	12.4042	4.81048	14.539	0.53788	0.154035
1329	ENSG00000064102.10	<ASUN>	16.271	16.8863	14.182	18.469	18.9428	39.1175	18.8144	13.433	16.3437	18.7796	16.8965	14.4962	14.5465	16.9288	16.6647	27.1142	20.8298	16.84	22.946	30.4044	15.8498	0.0633719	-0.0316809
1330	ENSG00000171456.12	<ASXL1>	93.7779	61.236	80.0776	77.7977	89.0331	72.9286	38.4605	78.2032	80.1101	66.057	87.5432	104.996	86.1627	90.9587	66.3581	50.8344	55.8747	77.9117	123.919	6.87211	107.137	-0.14271	-0.119262
1331	ENSG00000143970.12	<ASXL2>	10.0859	10.1355	11.1136	10.9535	11.9283	11.7475	8.05804	8.96734	11.3888	6.81321	8.74016	14.9894	9.88368	11.7296	7.21447	11.5741	9.4009	11.6267	9.89173	4.43901	8.14047	0.089011	0.103438
1332	ENSG00000141431.5	<ASXL3>	3.58454	2.02342	4.06001	2.36693	2.13723	1.72808	2.05147	2.48493	1.83035	1.08942	1.96388	4.45632	1.49425	1.38525	1.54059	1.48728	0.473836	2.11395	0.720357	0.91009	2.70774	0.379525	0.415865
1333	ENSG00000154438.3	<ASZ1>	0	0	0	0	0	0	0	0	0	0	0	0	0	0	0	0	0	0	0	0	0	0	1
1334	ENSG00000138138.9	<ATAD1>	31.0836	29.4867	34.2014	38.8211	40.443	31.5942	41.1773	24.8853	37.8827	28.3769	23.7081	38.0812	26.8966	37.3298	35.6027	49.4997	35.2155	35.9193	33.1013	35.7536	27.1119	-0.112353	-0.0659416
1335	ENSG00000156802.8	<ATAD2>	0.0878563	0	0.374194	0.345537	0.89508	0	0	0.306114	0.184884	0.172924	0.442316	0.6341	0.216037	0.215883	0.281815	0.533895	0.0947671	0.0716594	0	0.0185733	0.120727	-0.0765162	-0.00406934
1336	ENSG00000119778.10	<ATAD2B>	14.6369	11.0184	8.38195	17.1386	20.258	18.3281	10.8857	11.5243	16.3067	14.3354	13.0041	12.7348	15.5727	23.4053	9.13082	13.4999	11.789	15.7113	19.1509	6.25919	9.05455	0.150233	0.115283
1337	ENSG00000197785.9	<ATAD3A>	38.8852	51.8363	25.8194	37.5253	40.169	23.7917	47.5535	33.9607	47.3857	49.3526	40.2154	39.9835	20.2895	47.4763	40.3184	16.074	48.8809	31.7272	57.6637	11.5897	31.9927	-0.0163583	0.259844
1338	ENSG00000160072.15	<ATAD3B>	60.6209	45.2142	23.3497	58.1539	80.064	32.1179	28.9424	36.8778	14.7537	66.7833	64.985	32.4096	29.129	57.8566	42.0844	24.3494	30.1739	41.0788	84.2993	13.7256	61.1742	-0.00113858	0.0315083
1339	ENSG00000215915.5	<ATAD3C>	10.0332	2.99834	0	7.48088	7.43464	3.80527	4.84222	3.58334	1.07233	4.37498	4.44085	1.79662	0.990169	8.05963	1.74726	0.838977	2.7672	3.33216	7.9942	1.0401	2.12135	0.808224	0.340504
1340	ENSG00000176208.4	<ATAD5>	0.439282	0.275921	0.149678	0.190045	0.0913347	0	0	0.0900336	0	0.276679	0	0.228981	0.108018	0	0.150302	0	0	0.0895743	0.140557	0.0371465	0	0.20813	0.499805
1341	ENSG00000137343.13	<ATAT1>	43.6119	42.6389	28.8691	41.0498	51.1109	66.3304	40.7707	39.3987	47.2563	52.1712	46.8324	47.2581	26.0144	42.3131	41.5772	25.3791	30.4582	37.2092	49.3357	45.0773	50.9642	0.027118	0.377506
1342	ENSG00000167654.13	<ATCAY>	0	0	0.336775	0.0172769	0	4.04965	0	0.10804	0.0739535	0.363141	0.0176926	0.510803	0	0.269854	0.0187877	0	0.189534	0.161234	0.0878484	0	0.0172468	0.0727395	0.299839
1343	ENSG00000107669.13	<ATE1>	17.501	15.0837	28.5884	18.037	19.8196	27.5446	16.9847	16.4761	21.6314	14.1106	16.4188	22.9509	22.2878	20.9586	18.7313	21.0888	22.365	18.3269	23.3325	12.3327	13.9354	-0.23216	0.0385083
1344	ENSG00000123268.4	<ATF1>	13.0555	18.1924	9.93486	19.7302	19.162	7.71528	13.2884	21.1759	11.3703	8.59433	14.4018	21.6123	17.1569	7.12414	15.4811	26.0083	24.014	20.7275	17.8684	4.42044	2.86296	-0.369019	-0.1496
1345	ENSG00000115966.12	<ATF2>	26.8489	21.4298	30.2723	29.3707	21.0435	29.2028	47.2578	38.4984	36.1817	35.6743	16.7195	33.2374	38.5626	29.7739	18.9944	34.7985	23.1232	22.7519	26.8992	45.7831	38.0636	0.00226851	0.139798
1346	ENSG00000162772.12	<ATF3>	122.384	66.8464	640.078	281.095	77.2326	117.283	79.5824	63.4377	51.5641	270.747	163.834	294.909	214.11	86.1733	196.369	57.203	267.338	273.255	159.779	50.445	290.28	-0.992719	-0.0473033
1347	ENSG00000128272.10	<ATF4>	945.387	977.44	1012.93	1085.32	911.118	999.565	1255.3	955.886	1103.74	1004.4	938.93	895.508	1279.24	1016.75	1503.45	1075.72	1299.16	1043.67	1436.11	1504.14	977.718	-0.102401	-0.610782
1348	ENSG00000169136.4	<ATF5>	4.91995	12.6372	8.21357	0.984781	5.00514	15.064	5.23033	11.9385	6.23058	2.59386	5.06009	9.30014	10.1177	15.3097	8.00356	2.36439	5.09847	15.4964	16.5331	7.05784	16.7294	-0.653464	-0.407593
1349	ENSG00000118217.5	<ATF6>	0	0	0	0	0.47494	0	0	0	0.68407	0	0	0	0	0	0	1.14406	0	0.573276	1.35287	0.427185	0	0	-0.357027
1350	ENSG00000213676.6	<ATF6B>	170.072	188.086	154.524	184.966	165.9	193.109	151.864	163.501	170.444	165.748	158.738	179.01	162.568	203.38	129.278	134.675	140.729	178.987	165.243	118.627	133.8	0.0814439	0.538315
1351	ENSG00000170653.14	<ATF7>	61.64	60.0219	74.8389	75.6899	83.9183	34.0554	38.3681	56.5231	74.693	54.2463	66.4182	81.5347	68.6637	59.098	53.1316	64.1436	55.4198	66.3387	67.204	26.2069	52.8096	-0.0758924	0.0608938
1352	ENSG00000171681.8	<ATF7IP>	12.0012	5.88631	6.19292	26.5373	16.2941	16.3557	5.21185	7.31073	11.962	15.7361	15.5341	10.8678	6.76915	9.89463	6.53812	15.4829	12.4903	11.7701	10.4012	8.97089	7.4506	0.195306	0.242814
1353	ENSG00000166669.9	<ATF7IP2>	10.0156	9.28933	9.74776	9.08763	11.6543	11.4682	17.0032	10.714	11.1485	6.20798	9.62479	12.1007	12.6562	19.8252	14.692	7.97028	6.14091	8.04377	10.9108	8.11652	11.3656	-0.0707334	-0.0860732
1354	ENSG00000152348.11	<ATG10>	8.53964	9.12378	8.2884	5.3731	15.6182	2.21683	9.99862	9.41751	9.04081	10.8078	9.58941	12.8581	7.92135	15.3097	10.352	12.5465	7.84672	8.67079	11.35	9.95527	12.5556	-0.17952	-0.471225
1355	ENSG00000145782.8	<ATG12>	83.7798	57.649	72.2008	80.9248	75.0041	104.243	52.636	76.6366	66.78	58.9153	71.0005	77.6244	61.8225	69.3884	64.5357	89.2176	63.7783	56.6826	81.6639	74.8503	77.3172	0.0515666	0.0698448
1356	ENSG00000175224.12	<ATG13>	98.4518	142.228	122.212	120.869	116.781	113.198	119.226	156.911	154.637	98.7916	97.221	108.678	174.342	157.253	90.4439	126.114	135.688	112.577	125.606	74.2745	146.166	-0.0650332	0.0482372
1357	ENSG00000126775.8	<ATG14>	19.5568	8.55354	20.6742	2.36693	4.23793	30.6691	19.3689	16.8183	12.794	10.4965	7.00628	16.2048	18.2731	15.9034	4.90359	6.3686	3.92336	11.8417	9.06595	9.95527	24.8871	0.549877	0.268507
1358	ENSG00000085978.17	<ATG16L1>	33.1921	31.4182	37.0827	40.7216	40.443	35.6439	36.5569	34.0507	41.4694	30.1234	33.4214	39.2438	36.8163	48.9874	26.7912	33.2349	33.3391	38.9827	44.6973	22.1951	37.3392	-0.0279462	0.0185914
1359	ENSG00000168010.6	<ATG16L2>	161.146	77.828	131.885	240.494	87.0054	69.612	56.1475	89.2233	55.2248	140.224	135.632	160.286	74.2086	97.6331	93.713	46.2391	49.222	131.818	105.594	74.8317	81.077	-0.0883857	0.225035
1360	ENSG00000110046.8	<ATG2A>	28.5533	27.7024	23.1252	28.455	21.829	33.7936	22.9543	22.1483	30.5428	11.5686	20.9481	32.2863	34.9439	47.7641	21.0986	24.502	29.9843	26.7648	34.7704	19.4648	25.5252	-0.0733179	-0.371296
1361	ENSG00000066739.7	<ATG2B>	40.8708	30.0386	34.2201	60.8146	33.0997	83.2272	24.1002	40.7312	38.2524	32.6827	29.0867	38.5216	37.7164	50.7865	16.6083	25.932	28.6007	39.0544	46.9989	15.583	39.9607	-0.0569881	0.395702
1362	ENSG00000144848.6	<ATG3>	14.9707	14.2007	12.2923	15.8083	11.9648	59.0864	12.4752	13.361	13.5335	15.0617	15.8172	18.8645	14.9065	15.7415	13.0011	25.5125	11.808	13.9736	16.4276	9.97385	15.0737	-0.116339	0.181915
1363	ENSG00000101844.13	<ATG4A>	19.8907	17.2542	14.3129	14.9963	22.1213	27.1082	14.4158	17.5385	22.6852	20.0938	11.9425	14.5491	21.4597	17.3966	18.938	21.2223	20.6592	18.4523	16.5858	11.6269	14.4183	0.102521	0.370637
1364	ENSG00000168397.12	<ATG4B>	277.749	190.808	137.142	362.227	163.854	186.231	210.378	199.586	188.711	245.206	266.097	238.563	161.055	236.644	169.39	108.056	150.964	201.273	298.017	102.432	250.889	-0.044112	0.193217
1365	ENSG00000125703.10	<ATG4C>	2.17884	7.57862	10.2716	5.94324	9.26134	6.58068	2.88315	2.16081	5.17674	14.3354	0.743091	14.919	8.58746	3.27422	12.1556	9.99146	10.9551	4.01293	4.07617	11.5897	5.43273	-0.426436	-0.193878
1366	ENSG00000130734.5	<ATG4D>	30.5213	42.1791	32.3304	39.063	28.7704	20.8766	47.9047	39.6868	32.7244	30.7459	28.2905	32.392	35.9161	34.4153	33.273	26.6947	27.7478	32.7305	41.2185	28.5471	44.4449	-0.00884238	0.12903
1367	ENSG00000057663.8	<ATG5>	26.5853	27.2058	33.5278	28.4723	32.57	37.4941	33.1008	25.5875	34.6657	20.3532	20.4881	28.8692	32.8556	32.7063	30.4736	37.6396	29.5484	32.5334	31.3267	27.0798	25.1803	0.00220979	0.0109484
1368	ENSG00000197548.8	<ATG7>	11.5795	26.0101	25.0149	13.9252	21.2993	30.8087	18.8329	13.1089	20.0599	8.31765	9.57172	18.3537	15.5186	23.927	9.86354	20.9744	21.3226	15.8905	25.6166	7.54075	17.264	0.167171	0.214667
1369	ENSG00000198925.6	<ATG9A>	71.7611	93.9234	70.5356	87.922	82.6944	79.2125	75.6088	83.047	100.207	73.5447	74.0614	66.8095	65.0091	107.456	74.249	91.3151	98.6715	85.848	91.6083	57.9486	50.4123	0.123923	0.164457
1370	ENSG00000181652.14	<ATG9B>	8.18821	2.20737	0.804518	2.14233	2.97751	3.5609	2.14388	2.55695	4.54814	16.3068	4.83009	3.31141	6.40909	8.61733	4.90359	5.30081	5.13638	2.45434	6.99273	1.18869	67.3831	-0.786699	-0.310212
1371	ENSG00000142102.11	<ATHL1>	210.24	142.026	129.64	228.089	247.444	177.923	183.062	196.795	183.719	209.705	283.701	138.604	129.442	252.061	126.817	74.4211	151.002	232.069	221.027	87.7587	270.239	0.332401	0.144729
1372	ENSG00000138363.10	<ATIC>	65.2421	82.6106	63.2388	78.0223	87.042	67.6745	91.4107	98.3347	125.702	94.7624	99.2026	50.4286	54.2792	54.2586	101.623	91.0481	75.3967	76.8189	105.506	111.402	86.7857	-0.0327541	0.102876
1373	ENSG00000198513.7	<ATL1>	11.2456	10.5402	13.0781	19.592	7.61731	23.6171	12.697	10.0477	9.13325	16.497	7.85553	17.8077	2.79047	4.19173	5.09146	2.32626	6.14091	14.726	6.90488	7.15071	3.88052	0.909157	0.888707
1374	ENSG00000119787.9	<ATL2>	43.2956	35.0419	60.0582	54.3357	54.9835	58.7548	31.8256	50.3828	44.1317	39.9974	46.4609	46.7473	81.4459	54.8523	38.0451	66.5271	52.1409	40.9175	58.0854	26.244	36.2527	0.0154887	-0.137468
1375	ENSG00000184743.8	<ATL3>	25.9352	24.9432	22.7136	27.7812	32.0585	20.7021	11.163	29.3329	27.9359	19.9036	23.7258	40.7057	30.4972	13.1868	15.7065	25.4744	36.1442	24.7225	37.072	5.9063	35.2524	-0.0019561	-0.15644
1376	ENSG00000149311.13	<ATM>	57.7392	32.9449	49.1504	93.9689	65.8889	51.7203	17.7794	42.892	42.2829	47.6233	45.9478	61.7015	39.3727	62.1023	34.2124	45.4001	34.1541	54.5149	34.4014	15.7687	36.9425	0.294046	0.325947
1377	ENSG00000166454.5	<ATMIN>	19.1175	15.1388	16.6704	17.2769	18.066	29.5869	11.089	12.8748	13.2192	17.4308	14.9503	9.35298	17.9311	11.2079	11.0847	6.23513	6.42521	14.9768	14.0382	12.9084	25.4045	0.382038	0.524305
1378	ENSG00000111676.10	<ATN1>	256.382	130.069	139.462	278.382	218.911	199.794	66.0722	163.411	155.968	174.982	160.844	222.481	167.212	257.836	150.658	105.902	185.421	206.093	304.131	55.627	164.275	0.0169665	-0.0183354
1379	ENSG00000172238.3	<ATOH1>	0	0	0	0	0	0	0	0	0	0	0	0	0	0	0	0	0	0	0	0	0	0	1
1380	ENSG00000179774.7	<ATOH7>	0	0	0	0	0	0	0	0	0	0	0	0	0	0	0	0	0	0	0	0	0	0	1
1381	ENSG00000168874.8	<ATOH8>	61.5873	67.7477	97.3279	198.753	107.903	124.125	38.9041	121.131	79.1117	190.735	82.8015	73.9079	97.6306	68.5068	74.3805	101.135	68.782	55.4465	61.7223	125.128	100.514	0.461598	0.458447
1382	ENSG00000177556.7	<ATOX1>	10.0332	9.85956	11.7871	7.98191	8.53066	7.64545	11.4402	6.33836	7.65418	12.7791	8.59862	6.51714	6.15705	17.7564	11.3478	15.4829	4.34033	10.1398	6.11425	6.33349	14.401	0.0916099	-0.0683985
1383	ENSG00000206190.7	<ATP10A>	1.59899	1.0301	1.16	0.259153	0.328805	8.36112	0.646861	2.89908	1.71942	0.933791	1.02617	0	8.51545	4.87536	0.526055	0.743639	0.833951	3.06344	3.14497	2.35881	7.38161	-0.841808	-0.282488
1384	ENSG00000118322.8	<ATP10B>	32.7001	14.6422	29.5801	11.8001	48.0969	15.9717	13.3808	31.6018	16.3437	26.9589	14.6495	56.9281	0.396067	35.9625	19.0507	2.32626	3.54429	20.4946	9.92687	8.76658	50.7055	0.548121	0.170054
1385	ENSG00000145246.9	<ATP10D>	24.3713	16.2425	31.133	33.1197	18.9245	31.0357	20.4778	23.2287	14.4764	22.8779	22.6997	30.0493	16.6528	23.927	8.98052	29.4214	13.4001	25.045	17.1831	24.9068	21.8861	0.021824	0.250412
1386	ENSG00000068650.14	<ATP11A>	28.4655	30.0018	31.3575	22.3044	30.8163	27.9984	18.4078	30.1973	28.583	18.7277	28.9275	30.3311	35.8081	30.1157	22.0755	16.8558	19.0861	27.8755	41.9037	9.88098	45.5659	-0.0199048	-0.114766
1387	ENSG00000058063.11	<ATP11B>	9.03163	7.61541	7.97034	10.9017	10.266	6.19666	4.60195	8.67924	7.4693	7.33199	6.17473	14.0911	10.1177	8.4914	5.09146	7.56986	6.99381	7.38092	5.97369	2.17307	9.77891	0.0735077	0.107407
1388	ENSG00000101974.10	<ATP11C>	43.3132	30.5536	38.1678	41.5509	43.4205	41.282	31.2711	35.8514	34.5548	37.9396	36.0045	39.5432	46.1599	46.2889	26.8664	38.9743	38.5134	40.4338	61.3357	28.6586	38.0981	-0.034045	-0.220494
1389	ENSG00000075673.7	<ATP12A>	0.0702851	0	0.0561291	0.0345537	0.0365339	0.0872769	0	0.0900336	0.0184884	0	0.0884632	0.0352278	0	0	0.0375754	0.0190677	0	0.0358297	0	0	0	0.0990765	0.448565
1390	ENSG00000105726.12	<ATP13A1>	125.494	107.094	99.1054	135.762	106.551	128.314	98.7664	113.064	104.348	104.014	100.07	114.385	129.676	178.859	119.302	66.6606	87.3942	111.036	184.288	83.0783	147.253	-0.098233	-0.198763
1391	ENSG00000159363.13	<ATP13A2>	30.4159	59.3229	23.4994	46.2847	28.259	23.0062	62.3759	29.9092	45.9806	40.1011	43.3823	42.7137	25.6004	37.8875	49.7686	19.6778	38.8735	43.7839	33.5757	34.602	31.3718	-0.102349	0.145925
1392	ENSG00000133657.10	<ATP13A3>	111.701	58.4952	65.6711	81.374	76.9038	146.52	136.192	67.4171	86.655	102.544	67.4797	81.0768	65.3511	101.519	103.99	74.8597	65.3325	81.853	110.338	46.8789	71.8327	0.165407	0.396599
1393	ENSG00000127249.10	<ATP13A4>	4.07653	8.47996	2.3013	8.50022	1.91803	3.82273	2.60593	7.31073	5.54651	7.28011	2.56543	9.38821	1.1702	2.10486	2.36725	1.52541	2.00906	2.61557	2.61788	4.10469	3.27688	0.793035	0.620238
1394	ENSG00000187527.6	<ATP13A5>	0	0.0367894	0.0935486	0	0	0	0	0.0540201	0.129419	0.0345848	0	0	0	0	0	0	0	0.0179149	0.052709	0.334319	0.258701	0.049052	-0.190554
1395	ENSG00000163399.11	<ATP1A1>	149.321	292.145	155.104	245.971	114.461	168.601	682.309	208.86	385.926	214.685	153.661	137.565	157.329	228.638	455.151	303.443	253.142	122.735	268.342	331.366	228.882	-0.111832	0.111493
1396	ENSG00000018625.10	<ATP1A2>	108.397	140.83	41.0865	152.278	52.7915	228.142	93.2589	159.053	117.364	236.923	97.451	153.787	102.293	142.141	58.6927	75.9847	104.699	127.446	99.3741	225.702	78.1968	0.334285	0.224214
1397	ENSG00000105409.11	<ATP1A3>	0.263569	0	0.130968	0.120938	0.0913347	1.69317	0.277226	0.378141	0.129419	0.0691697	0.26539	0.211367	0.23404	0.359805	0.0751508	0.0953383	0.0189534	0	0.210836	0.0371465	0	0.0820846	0.34937
1398	ENSG00000132681.12	<ATP1A4>	5.49981	1.83947	1.30968	3.36899	1.55269	2.84523	0.813196	2.39489	0.795	2.85325	2.68928	6.44669	0.144025	8.25752	2.57391	0.0190677	1.30779	2.72306	4.90194	0.352892	0.74161	-0.232062	-0.134073
1399	ENSG00000143153.8	<ATP1B1>	23.8794	43.9082	249.419	37.629	9.13347	47.0422	49.1245	16.8003	36.8288	16.8947	10.4917	30.0669	3.47459	23.1355	25.5325	11.9364	10.5002	20.4229	6.2021	18.1832	24.3524	1.01393	0.511943
1400	ENSG00000129244.4	<ATP1B2>	0	0	0	0	0	0	0	0.324121	0	0.466895	0	0	0	0	0	0	0	0	0	0	0	0	0.468095
1401	ENSG00000069849.6	<ATP1B3>	163.29	203.887	79.7782	235.967	136.911	238.475	418.353	164.275	260.889	315.448	190.974	93.8821	183.271	175.099	219.797	282.945	212.373	133.645	239.352	136.124	204.236	0.203151	0.303093
1402	ENSG00000101892.7	<ATP1B4>	0	0	0.0187097	0	0	0.22692	0	0	0	0.0172924	0	0.211367	0.0540092	0	0	0.0190677	0	0	0	0	0	0	0.0148849
1403	ENSG00000196296.9	<ATP2A1>	5.16595	1.96823	2.95614	2.00412	1.53442	8.78005	2.19933	2.01675	5.21372	1.64278	2.8839	5.49554	2.9345	3.5081	4.37753	1.54448	1.80058	4.83701	2.02051	1.02153	6.29507	-0.397134	0.00380545
1404	ENSG00000174437.12	<ATP2A2>	100.314	95.9284	102.398	125.482	157.077	108.503	80.987	89.7815	91.4989	66.9217	98.4772	109.858	138.768	124.295	78.1004	150.215	119.899	90.9896	181.354	44.7059	118.623	-0.272482	-0.275308
1405	ENSG00000074370.13	<ATP2A3>	9.03163	16.4081	17.5497	12.5257	11.8735	11.9569	20.8289	16.5122	12.3687	8.78455	33.2268	19.5338	60.0762	15.9573	7.06417	22.2329	16.4516	20.8708	16.129	4.71761	20.7306	-0.629794	-0.505338
1406	ENSG00000070961.10	<ATP2B1>	9.10192	3.8261	18.242	4.30194	7.05104	12.0093	11.0706	9.93971	8.65256	5.06668	12.491	15.8877	12.5481	6.13467	5.78661	5.81564	4.79522	15.7113	7.22114	0.241453	14.3321	0.280349	-0.037149
1407	ENSG00000157087.12	<ATP2B2>	7.16908	1.91305	4.90195	3.7318	1.37002	6.96469	0.776233	2.35888	0.628605	3.6487	3.23775	15.2008	1.69229	3.67001	2.53634	1.06779	2.02802	6.89722	2.61788	2.34023	4.93257	0.16835	-0.183597
1408	ENSG00000067842.13	<ATP2B3>	0.175713	0	0.0561291	0.224599	0	0.279286	0	0.126047	0	0	0.247697	0.0176139	0.108018	0.0359805	0.0375754	0.0381353	0	0	0.0175697	0	0.206961	-0.0214661	0.163078
1409	ENSG00000058668.10	<ATP2B4>	114.336	79.1157	87.8421	119.245	105.291	109.323	86.9935	98.1006	101.446	84.3524	119.195	126.767	143.43	96.5896	69.1199	152.77	111.2	119.17	95.5088	100.221	114.484	-0.197497	-0.551046
1410	ENSG00000017260.15	<ATP2C1>	125.582	88.3682	100.247	149.099	121.037	83.3145	94.9037	97.5244	105.384	110.447	101.414	101.773	82.472	102.886	122.082	113.071	73.8425	113.634	86.7591	87.9073	66.3655	0.0196975	0.451114
1411	ENSG00000064270.8	<ATP2C2>	0.96642	0	0.374194	1.48581	0.401873	1.25679	1.46006	0.396148	0.795	0.103755	1.52157	0.352278	2.84448	0.269854	0.206665	0.209744	0.189534	0.447872	3.44366	0.352892	1.93164	0.365016	-0.263942
1412	ENSG00000105675.4	<ATP4A>	0.158141	0.3495	0.0561291	0	0	0	0.0554452	0	0.129419	0.0691697	0	0.510803	0.0540092	0	0.939385	0	0	0	0.0702787	0.130013	0.068987	0.00462264	-0.246424
1413	ENSG00000186009.4	<ATP4B>	0	0	0	0	0	0	0	0	0	0	0	0	0	0	0	0	0	0	0	0	0	0	1
1414	ENSG00000152234.11	<ATP5A1>	374.584	477.361	476.05	327.69	434.497	377.769	506.88	395.175	480.494	368.968	432.178	362.388	427.717	447.885	464.338	546.727	455.185	394.79	302.111	325.887	352.179	-0.0440611	0.126313
1415	ENSG00000110955.4	<ATP5B>	179.947	125.231	92.7254	151.725	116.141	194.523	106.307	121.581	131.064	184.268	166.311	90.5354	195.585	195.392	96.9069	152.465	100.358	117.611	177.805	110.14	190.508	-0.249777	-0.0819012
1416	ENSG00000165629.15	<ATP5C1>	114.547	176.626	116.917	84.8121	154.319	145.944	220.247	124.588	161.718	87.0673	94.3725	133.461	126.598	135.413	173.41	174.774	158.356	114.1	69.6813	145.949	114.001	0.019319	0.146917
1417	ENSG00000099624.3	<ATP5D>	146.193	233.171	165.768	165.15	194.981	95.4634	229.192	169.731	260.649	180.17	155.271	151.268	194.739	163.477	223.01	153.724	192.699	184.433	272.541	273.343	170.605	-0.0759425	-0.153756
1418	ENSG00000124172.5	<ATP5E>	9.73448	75.3815	35.0433	48.8244	32.8257	6.0221	54.8908	33.2044	29.8402	52.396	21.7973	51.2564	31.7934	5.05526	24.4616	12.0508	15.3333	33.6799	22.1202	4.40187	40.0815	0.614152	0.548209
1419	ENSG00000180389.6	<ATP5EP2>	0	0	0	0	0	0	0	0	0	0	0	0	0	0	0	0	0	0	0	0	0	0	1
1420	ENSG00000116459.6	<ATP5F1>	101.21	145.594	121.52	95.8866	122.918	112.832	131.627	99.361	135.279	96.6473	123.99	127.877	136.481	120.085	145.022	202.098	187.923	120.549	118.402	115.619	90.2005	-0.0812148	-0.510942
1421	ENSG00000159199.9	<ATP5G1>	48.7427	149.42	81.2189	161.711	142.117	100.299	141.736	86.3962	119.324	74.6514	89.2947	67.2322	67.6555	40.3701	149.832	85.5376	125.301	130.313	134.144	110.957	88.5448	0.296877	0.227725
1422	ENSG00000135390.13	<ATP5G2>	614.906	736.156	806.501	623.211	699.532	603.572	674.565	584.084	702.151	591.798	648.647	591.457	723.381	604.922	671.791	790.355	828.795	654.842	569.082	834.033	525.077	-0.0131671	-0.100908
1423	ENSG00000154518.5	<ATP5G3>	239.778	399.975	279.074	236.313	320	299.918	359.322	256.236	373.798	233.396	274.873	261.39	267.111	276.798	379.943	518.621	322.17	290.113	280.535	209.098	259.581	0.0645973	-0.0376029
1424	ENSG00000167863.7	<ATP5H>	29.5197	18.689	19.5704	30.58	27.6196	41.5438	21.0692	23.3367	22.5558	26.9762	28.6798	29.2391	20.1274	33.0121	15.218	14.9681	17.3992	24.615	26.5654	18.7776	25.7149	0.0307705	0.330444
1425	ENSG00000169020.5	<ATP5I>	103.389	95.8732	86.7382	98.2881	74.8031	108.101	113.293	111.029	94.605	189.853	94.9387	109.382	80.4377	55.5359	113.91	90.3807	101.875	86.5825	87.6551	64.6721	117.226	0.157139	0.448131
1426	ENSG00000154723.8	<ATP5J>	50.0957	56.0119	70.5918	73.2366	59.5137	17.1586	57.4412	63.1135	61.8991	68.1667	55.6433	68.659	72.9664	51.65	80.8434	67.8428	71.7387	51.4157	53.1483	50.185	41.5302	0.124567	-0.138581
1427	ENSG00000241468.3	<ATP5J2>	505.104	516.56	450.493	441.631	542.455	389.325	537.357	471.794	653.065	472.377	576.656	454.033	347.495	449.522	1018.27	571.992	632.931	467.847	456.039	889.771	420.786	0.0629667	-0.334201
1428	ENSG00000248919.3	<ATP5J2-PTCD1>	1.84498	1.36121	0.299355	2.14233	2.1555	0.94259	0	0	0.924418	0	0.67232	0.528417	0.828141	0	3.23148	0.286015	0.549649	0.734509	1.40557	0	3.79429	0.29018	-0.0814753
1429	ENSG00000167283.3	<ATP5L>	230.043	286.59	258.83	230.853	294.627	151.181	314.079	247.322	278.472	229.695	282.834	188.997	260.972	243.138	501.481	356.298	286.235	211.879	181.249	288.889	243.179	-0.0442394	-0.244179
1430	ENSG00000249222.1	<ATP5L2>	0	0	0	0	0	0	0	0	0	0	0	0	0	0	0	0	0	0	0	0	0	0	1
1431	ENSG00000241837.2	<ATP5O>	18.3971	33.3312	22.4329	40.1687	23.674	10.3336	20.1821	23.0486	39.4172	47.7617	24.4158	23.7435	28.2828	34.9191	29.0833	42.4256	33.0548	29.882	20.0997	21.4336	33.8554	-0.310114	-0.0982456
1432	ENSG00000125375.10	<ATP5S>	29.5197	33.0553	34.0891	20.4904	29.3367	26.602	28.2771	27.0821	31.8924	28.2904	21.2312	32.1454	25.7264	33.5158	24.0482	28.1629	23.616	25.3137	25.8626	20.542	37.8566	0.160549	0.267786
1433	ENSG00000105341.14	<ATP5SL>	25.4959	50.659	23.2375	42.2419	16.7508	41.2296	45.8717	27.4782	47.2563	42.6431	31.4221	38.3102	29.9751	22.7936	42.2723	26.0655	32.1261	34.8086	47.5611	35.6607	29.3367	0.37244	0.18936
1434	ENSG00000071553.12	<ATP6AP1>	14.18	28.8797	21.6659	8.18923	9.97375	49.5733	14.0276	20.7617	18.7102	15.3211	11.1817	13.7388	15.1586	27.0213	9.58172	12.2224	5.68603	10.946	14.249	4.45759	27.9397	0.461277	0.445251
1435	ENSG00000205464.7	<ATP6AP1L>	9.33034	3.25586	8.13873	10.9535	8.74986	30.8436	6.19138	10.3359	3.79012	23.241	12.7387	24.3248	10.2797	30.3495	5.09146	8.46604	2.71034	9.94275	12.9313	9.26806	4.5359	-0.130425	-0.032274
1436	ENSG00000182220.9	<ATP6AP2>	5.04295	7.92812	7.95163	8.22379	3.85432	0	5.95112	4.78979	8.81895	2.59386	3.62699	4.98473	4.06869	2.9504	6.95145	5.94911	1.72476	2.57974	1.80968	1.07725	4.51865	0.53916	0.547831
1437	ENSG00000033627.10	<ATP6V0A1>	87.4698	122.196	75.344	105.976	68.5193	98.5356	137.449	113.622	143.544	116.897	120.292	108.096	80.8878	116.487	67.7108	75.6796	99.297	126.981	117.524	110.288	83.1638	0.0224465	0.198009
1438	ENSG00000185344.9	<ATP6V0A2>	22.3682	16.1506	15.6787	17.657	16.9517	29.133	11.1815	18.3128	12.5536	10.7732	15.7818	16.6804	23.8721	26.9854	14.2599	13.4999	12.206	16.1592	33.0134	8.97089	25.5252	0.0335485	-0.188086
1439	ENSG00000105929.11	<ATP6V0A4>	0	0	0.0935486	0.207322	0	0.331652	0.166336	0	0.0369767	0	0.106156	0	0	0.0359805	0.112726	0	0.113721	0.125404	0.228406	0.0928664	0	-0.193395	0.0756743
1440	ENSG00000117410.9	<ATP6V0B>	159.248	190.79	231.72	197.043	171.088	127.337	197.219	143.694	179.115	171.195	183.897	110.879	80.7978	178.427	261.9	122.033	145.979	153.853	172.938	198.307	122.297	0.186514	0.336208
1441	ENSG00000185883.6	<ATP6V0C>	72.9032	74.1675	30.422	73.1848	45.1011	5.02715	105.531	55.7308	82.606	86.1508	31.8114	80.0199	43.7114	47.998	139.705	35.1989	13.0589	56.808	49.2127	128.676	60.7258	0.564994	0.0128994
1442	ENSG00000159720.7	<ATP6V0D1>	7.81921	24.8145	18.6723	11.7483	13.8646	15.0116	29.4969	10.5159	15.8076	8.36953	13.0218	6.14725	11.4319	17.0907	11.855	8.42791	12.7367	15.7651	13.8976	15.5458	23.0934	0.143713	0.24771
1443	ENSG00000147614.3	<ATP6V0D2>	0	0	0	0	0	0	0	0	0	0	0	0	0	0	0	0	0	0	0	0	0	0	1
1444	ENSG00000113732.4	<ATP6V0E1>	108.942	179.146	164.477	172.147	127.339	128.838	151.125	174.917	141.565	120.666	135.402	142.056	166.69	104.289	152.8	201.717	169.652	164.423	146.022	110.102	107.223	0.00318384	0.0363798
1445	ENSG00000171130.13	<ATP6V0E2>	115.777	128.377	76.3169	127.607	101.272	91.8327	146.93	104.655	121.746	165.955	115.975	147.781	17.445	99.576	149.4	74.9169	100.567	175.458	92.9085	102.376	115.191	0.213224	0.196112
1446	ENSG00000114573.5	<ATP6V1A>	0.896135	0.147158	0.449033	0	0.858546	0	0.406598	0.10804	0.0739535	0.328556	0	0	0.666113	0	0	0	0	0.250808	0.386533	0	0.931325	0.561413	0.267313
1447	ENSG00000116039.7	<ATP6V1B1>	4.77938	3.495	2.73162	8.17196	2.79484	8.86733	3.91813	2.25084	3.08756	2.92242	1.55695	1.23297	5.92301	2.26677	1.16484	3.33684	2.61557	2.84846	2.49489	1.72731	5.38099	0.340179	0.54071
1448	ENSG00000147416.6	<ATP6V1B2>	32.542	33.3312	35.2304	26.4163	22.925	34.4045	26.0408	31.5298	22.1676	24.3304	27.5297	27.8652	20.6135	24.0889	10.5587	17.18	17.5319	30.5628	31.52	21.3407	34.1313	0.261387	0.569154
1449	ENSG00000155097.7	<ATP6V1C1>	22.0344	16.776	36.3156	46.4748	24.6604	24.7517	10.9412	22.3823	28.6939	34.7578	22.0273	18.5122	12.1161	18.2061	23.6913	37.754	23.8434	18.6673	22.2784	24.7582	9.08904	0.162093	0.456467
1450	ENSG00000143882.5	<ATP6V1C2>	8.1355	4.8562	3.01226	8.93214	5.90022	10.2812	5.7663	6.06826	5.80535	7.48762	6.4755	7.67966	6.08504	7.44796	3.5133	5.11013	4.51092	7.02263	8.39831	4.08612	7.07117	-0.10536	0.187716
1451	ENSG00000100554.7	<ATP6V1D>	45.5799	57.7962	39.9452	37.0761	47.4027	73.9759	19.9048	37.58	45.2041	42.5393	24.982	47.8041	23.368	42.8708	44.1323	60.2729	39.6506	23.2714	44.4513	52.8038	29.3022	0.0329176	0.283347
1452	ENSG00000131100.8	<ATP6V1E1>	21.8235	20.1422	17.7742	49.9301	20.4042	44.0748	19.258	18.781	25.7173	17.5864	22.735	18.7764	21.2076	13.2228	14.9926	27.1905	14.6889	22.6265	18.2725	44.2973	20.2304	0.0029719	0.269642
1453	ENSG00000250565.2	<ATP6V1E2>	8.48692	8.3512	10.0471	7.10079	10.6314	6.14429	8.16893	10.5879	8.59709	10.0642	9.73095	9.68764	7.99336	3.8679	5.99327	10.716	6.12196	9.22615	7.09815	4.7919	7.26088	0.220422	0.495617
1454	ENSG00000128524.4	<ATP6V1F>	1.70441	3.25586	1.51549	2.57425	3.34285	4.5384	3.27127	1.0624	3.19849	2.21343	0.566164	1.53241	0.504086	0.521717	3.15633	0.858045	2.10383	2.97387	4.93708	3.25032	1.36249	0.736549	0.385497
1455	ENSG00000136888.6	<ATP6V1G1>	1.82741	0.459868	0.804518	3.52448	3.85432	0	2.47655	1.90871	0.831977	1.62549	1.27387	4.57961	4.93284	0.881522	0.770295	1.06779	3.14627	2.90221	0.931193	1.33728	0	0.327845	-0.120756
1456	ENSG00000213760.6	<ATP6V1G2>	3.74268	1.30602	0.879357	3.19622	3.59859	17.8045	2.66137	5.54607	1.79337	5.04939	2.42389	1.2682	1.38624	6.98021	3.00603	6.54021	3.63906	9.87109	4.48027	3.90039	2.46629	-0.0867891	0.0683807
1457	ENSG00000254870.1	<ATP6V1G2-DDX39B>	0	0	0	0.380091	2.00936	0	0	0	0	0.328556	0.530779	1.3915	0.432074	0	0	0.32415	0	0	0	0	0	0	0.0384126
1458	ENSG00000151418.7	<ATP6V1G3>	0	0	0	0	0	0	0	0	0	0	0	0	0	0	0	0	0	0	0	0	0	0	1
1459	ENSG00000047249.12	<ATP6V1H>	50.4471	71.629	73.2672	48.0124	59.879	80.7137	72.7441	77.825	93.5142	42.5221	60.208	58.3901	70.0859	94.3768	77.0671	92.8214	78.2966	60.1939	46.9286	121.116	56.2417	0.042308	-0.261783
1460	ENSG00000165240.13	<ATP7A>	4.09411	5.11373	6.75421	4.26739	4.2014	8.67532	7.15243	4.71776	6.97012	4.02913	3.85699	4.01597	6.42709	8.52738	4.37753	3.90887	5.62917	6.41352	4.72624	7.16928	4.41517	0.0513853	0.0849119
1461	ENSG00000123191.9	<ATP7B>	9.80477	7.74417	4.4342	8.79392	4.01873	12.0966	3.34519	9.27346	5.89779	11.7934	4.37008	9.28252	7.6513	5.07325	3.92663	6.23513	4.81417	9.67402	7.95906	4.56903	7.83003	0.380715	0.324983
1462	ENSG00000124406.12	<ATP8A1>	69.8634	44.9567	62.453	81.9787	53.7048	78.7936	31.0308	50.7249	61.4184	104.567	47.0447	45.2677	30.6952	61.4727	28.7076	26.2562	26.2315	55.8765	36.5625	41.6227	48.8428	0.567773	0.9561
1463	ENSG00000132932.12	<ATP8A2>	0.298712	0.404684	0.430323	0.32826	0.109602	0.907679	0.868642	0.504188	0.462209	0.293971	0.760783	0.898309	0.23404	0.323824	0.638781	0.552962	0.511743	2.07812	0.175697	0.538625	1.03481	-0.198668	-0.414912
1464	ENSG00000081923.6	<ATP8B1>	1.7747	4.81941	1.16	1.36487	3.48899	7.628	2.27325	2.89908	0.998372	4.73812	18.4534	4.89666	12.0801	0.647649	0.601206	1.54448	4.41615	2.07812	4.79652	0.872944	6.77797	-0.671712	-0.349536
1465	ENSG00000143515.12	<ATP8B2>	71.6908	81.0655	60.5821	73.323	101.034	104.348	63.799	95.9758	83.8632	47.2948	74.7691	83.12	84.3984	107.492	62.4127	91.3341	107.049	84.5044	76.7795	39.4125	50.3778	-0.10604	-0.00117226
1466	ENSG00000130270.12	<ATP8B3>	3.02226	2.83279	2.39484	2.7643	2.17377	3.29907	2.14388	2.89908	3.32791	2.47282	4.3347	5.53076	3.15054	3.00437	1.42786	3.20337	2.2365	3.43965	1.44071	2.45167	2.50078	-0.087327	-0.188315
1467	ENSG00000104043.10	<ATP8B4>	17.0441	4.76423	8.77486	15.0481	17.9016	14.3134	9.90621	11.2362	5.30616	12.9347	15.2157	20.6259	19.3353	14.9859	6.21873	13.3664	33.0737	15.998	37.0193	11.7569	16.1947	-0.390531	-0.671397
1468	ENSG00000054793.9	<ATP9A>	3.40883	5.07694	6.88518	4.47471	3.98219	4.60822	2.75378	7.86893	6.6743	2.35177	6.65243	8.89502	8.40743	3.25623	3.40057	10.4872	6.08405	9.62028	13.5989	0.427185	7.1574	-0.603013	-0.548306
1469	ENSG00000166377.15	<ATP9B>	47.583	53.8597	38.8227	42.5184	46.6903	69.6993	49.8452	51.4632	52.5439	58.6386	48.354	56.7872	39.8948	51.722	38.139	40.8048	40.4656	64.2785	48.8964	42.7	47.946	0.0784764	0.329754
1470	ENSG00000123472.8	<ATPAF1>	47.0207	64.0688	62.8646	85.4514	62.3816	56.0318	57.2749	60.1424	70.8105	62.2008	69.5144	66.3516	63.3888	68.237	50.7268	112.804	58.7935	67.9152	60.9668	80.5709	50.5157	-0.0903983	-0.268738
1471	ENSG00000171953.11	<ATPAF2>	43.0672	35.7041	28.3826	44.7471	41.5208	26.6718	31.4929	32.9883	27.751	47.3985	45.7532	39.3142	24.2321	53.2331	39.999	23.7964	34.1351	37.1375	35.5435	47.4919	35.9595	-0.111169	-0.160862
1472	ENSG00000130770.13	<ATPIF1>	82.7255	72.0889	32.3491	124.082	62.8931	118.051	40.2532	72.513	82.1808	115.375	74.6452	84.1592	26.3745	44.22	38.7778	40.7095	42.6263	66.7508	49.8803	48.8477	61.3984	0.657657	0.771086
1473	ENSG00000175054.10	<ATR>	49.8673	45.1406	30.2723	45.68	37.8491	66.0511	74.1857	53.4979	50.1959	56.7364	48.0001	30.9828	41.9291	55.302	28.5385	42.8832	41.3374	48.2805	64.4983	51.6523	50.2225	0.0591973	0.314311
1474	ENSG00000138085.12	<ATRAID>	275.078	306.309	325.867	218.708	287.248	267.643	275.064	264.915	310.531	255.305	289.381	272.751	257.804	270.825	366.585	326.972	256.648	278.719	176.189	377.316	250.337	0.0121959	-0.0821732
1475	ENSG00000164053.13	<ATRIP>	17.2023	9.49167	18.1297	18.5554	13.6271	5.70791	15.7834	15.5938	11.6846	19.3329	14.791	11.7485	10.1897	20.3829	6.23751	8.75206	5.95138	12.2358	14.6707	16.4002	8.19221	0.402378	0.434569
1476	ENSG00000088812.13	<ATRN>	4.81453	12.49	12.18	1.60675	7.74518	10.0892	6.96762	6.21232	13.0713	3.95996	7.89092	10.128	5.869	4.76741	4.8848	11.5931	8.75648	8.13335	3.91804	8.97089	16.0395	-0.136052	-0.0669404
1477	ENSG00000107518.12	<ATRNL1>	0.158141	0.331105	0.0374194	0.397368	0.255737	1.04732	0.0924087	0.396148	0.129419	0.259386	0.318467	0.810239	0	0.071961	0.150302	0.114406	0.227441	0.304553	0.158127	0.204306	0.396675	0.105161	0.168254
1478	ENSG00000085224.16	<ATRX>	33.1218	23.2509	30.3097	37.1625	36.6617	36.2723	26.1517	26.884	32.632	26.1634	21.5319	42.8194	40.6149	39.0748	39.8675	38.1735	24.4878	27.8576	29.8509	22.1208	40.7023	-0.274587	-0.25945
1479	ENSG00000124788.13	<ATXN1>	16.9914	16.2057	17.9613	21.717	13.1705	25.6769	18.5741	16.5302	22.0936	15.373	21.7442	20.1151	19.9294	14.752	13.9029	20.6121	17.2476	22.9848	16.5506	12.1841	15.7118	0.0184764	0.12454
1480	ENSG00000130638.11	<ATXN10>	92.8641	124.827	107.88	105.89	65.8523	107.193	185.926	116.521	80.7572	118.54	106.191	109.418	62.8667	147.988	76.2029	131.548	134.285	74.6691	109.881	152.449	126.746	-0.0309655	-0.0316892
1481	ENSG00000224470.3	<ATXN1L>	2.00312	2.55686	2.71291	3.02345	1.66229	0	1.68184	3.38526	3.84558	1.85029	1.4508	0.651714	1.33223	2.05089	1.3715	6.67368	1.21302	0.66285	0.54466	1.56015	1.55221	0.570886	0.267199
1482	ENSG00000204842.10	<ATXN2>	121.207	107.02	92.7441	142.914	121	142.506	79.7857	114.289	119.897	118.833	135.809	152.343	105.264	147.016	92.0785	103.118	116.62	132.749	121.301	72.38	68.1247	0.0334211	0.0779484
1483	ENSG00000168488.14	<ATXN2L>	240.164	214.556	167.789	243.085	299.413	200.719	206.829	197.444	209.529	211.555	241.788	270.162	241.295	280.972	196.782	145.944	192.017	230.582	332.717	226.055	215.015	-0.130875	-0.243183
1484	ENSG00000066427.17	<ATXN3>	34.4045	26.3412	34.033	41.2744	32.3325	32.1703	27.316	22.8505	35.2573	24.5206	28.3259	43.5239	32.7836	33.9656	18.1865	35.0273	25.227	34.8981	25.4058	18.8147	36.9425	-0.0232554	0.0794082
1485	ENSG00000123594.3	<ATXN3L>	0	0	0	0	0	0	0	0	0	0	0	0	0	0	0	0	0	0	0	0	0	0	1
1486	ENSG00000163635.13	<ATXN7>	44.6837	38.5921	29.2059	45.2827	47.0739	45.1396	14.8778	40.8752	32.558	41.8304	37.9507	70.4732	26.5545	32.1306	21.2113	24.1778	24.5257	25.5824	46.6475	10.5125	40.8403	0.629454	0.277085
1487	ENSG00000146776.10	<ATXN7L1>	17.4307	19.0753	15.0613	30.4764	29.0992	26.9511	13.6026	18.0247	14.347	17.0849	16.9142	20.5202	14.9065	14.4102	8.96173	14.0147	14.6131	13.1853	20.9782	14.7658	11.5036	0.270334	0.711572
1488	ENSG00000162650.11	<ATXN7L2>	12.6865	11.0368	14.1071	24.6195	13.1522	13.4581	10.9042	12.0645	11.093	19.8863	14.8087	12.9991	14.1144	23.1175	15.4998	7.16944	8.81334	12.9166	25.845	11.014	13.1593	-0.0255685	-0.0272322
1489	ENSG00000087152.11	<ATXN7L3>	34.1585	76.9267	34.0517	36.9898	52.9376	42.1198	65.5178	43.3242	62.6756	36.9193	36.5176	39.2438	48.7163	76.7824	50.7831	56.9742	52.7284	45.3425	60.0356	48.6063	43.4791	-0.187371	-0.121054
1490	ENSG00000253719.2	<ATXN7L3B>	0	0	0	0	0	0	0	0	0	0	0	0	0	0	0	0	0	0	0	0	0	0	1
1491	ENSG00000148090.7	<AUH>	69.4944	39.4383	67.8227	68.5891	49.8322	42.0849	46.3892	61.3489	66.2253	47.7271	41.2238	47.9803	43.8015	60.0334	32.0142	50.0908	37.1108	52.0427	53.6929	69.1111	47.601	0.21036	0.460854
1492	ENSG00000127423.6	<AUNIP>	0	0.128763	0	0	0	0.244375	0.572934	0.558208	0.0739535	0.0172924	0.194619	0	0.270046	0	0	0.0953383	0.303255	1.77357	0.54466	0.260026	0.0862338	-0.348318	-0.286342
1493	ENSG00000115307.12	<AUP1>	291.542	295.143	162.849	398.629	255.226	219.571	236.936	227.173	240.552	306.11	285.223	206.364	234.202	292.935	296.714	146.84	223.044	219.081	340.553	185.398	259.184	0.0817716	0.221662
1494	ENSG00000087586.13	<AURKA>	1.72198	2.26255	2.93743	2.59153	2.50257	3.94491	2.82771	1.09841	2.97663	0.345848	2.21158	2.21935	1.06218	4.56952	1.42786	5.56776	3.52534	2.74097	1.54613	1.91305	0.965818	0.16828	-0.111428
1495	ENSG00000175756.9	<AURKAIP1>	129.377	183.671	115.682	114.494	171.271	71.8114	242	110.885	218.237	146.38	157.818	121.624	128.02	152.179	240.689	102.87	195.391	160.105	162.643	207.965	92.6323	-0.194205	-0.0885741
1496	ENSG00000178999.8	<AURKB>	44.877	90.5756	10.1032	62.8187	15.6182	78.4619	116.86	106.132	116.07	200.333	103.307	72.0585	4.24872	73.6161	87.6446	44.0463	62.0156	107.865	58.7706	61.0875	81.215	0.228637	0.245479
1497	ENSG00000105146.8	<AURKC>	6.94065	4.32276	3.14323	5.304	1.79016	5.3588	7.85474	4.0335	3.45733	4.54791	3.48545	4.6853	8.11938	3.92187	1.70968	4.09955	1.13721	2.09604	4.09374	5.27481	5.19127	0.103479	0.262188
1498	ENSG00000158321.11	<AUTS2>	74.344	49.6105	45.3711	31.9622	68.2818	25.7816	22.3999	63.4016	54.5962	77.9023	63.7289	93.3184	39.8948	82.1075	24.2925	28.3536	23.5212	46.2203	109.037	2.916	113.915	0.171104	-0.132461
1499	ENSG00000169857.3	<AVEN>	0	1.34281	0	0	0	0	0	1.00838	0	1.24505	0	0	0	0	0	0	0	0	0.948763	1.13297	1.328	0	0.0636851
1500	ENSG00000135407.6	<AVIL>	9.15463	7.19233	10.122	7.77459	11.4534	7.88983	13.1036	15.1436	10.6308	13.4535	12.8449	11.2729	9.91969	19.2136	7.08296	17.3897	7.97939	16.6787	12.6502	9.63953	7.74379	-0.11427	-0.291713
1501	ENSG00000105778.13	<AVL9>	10.5779	7.28431	8.94324	18.4344	18.2669	19.8293	10.1465	7.41877	15.3269	10.289	13.1279	6.25293	15.6087	15.0758	9.16839	4.49997	14.1772	8.50956	15.2856	12.1469	5.17403	-0.210038	0.284989
1502	ENSG00000101200.5	<AVP>	0	0	0	0	0	0	0	0	0	0	0	0	0	0	0	0	0	0	0	0	0	0	1
1503	ENSG00000119986.6	<AVPI1>	0	0	0	0	0	0	0	0	0	0	0	0	0	0	0	0	0	0	0	0	0	0	1
1504	ENSG00000166148.2	<AVPR1A>	0	0.31271	0	0	0.529741	3.70054	0	0.0540201	0	1.41798	0	0.810239	1.33223	0	0	2.21185	1.68685	0	0.702787	0	4.07023	-1.19048	-0.217985
1505	ENSG00000198049.5	<AVPR1B>	0	0	0	0	0	0	0	0	0	0	0	0	0	0	0	0	0	0	0	0	0	0	1
1506	ENSG00000126895.9	<AVPR2>	4.88481	10.4482	6.41743	6.59976	7.21544	2.33902	11.9577	5.05989	14.273	1.08942	7.23629	5.65406	19.2813	7.9337	11.2914	8.73299	16.7738	7.07637	5.63987	1.00296	4.38068	-0.142516	-0.23752
1507	ENSG00000204195.3	<AWAT1>	0	0.66221	0	0	0	0	0	0	0	0	0	0	0	0	0	0	0	0	0	0	0	0	0.319477
1508	ENSG00000147160.5	<AWAT2>	0	0	0	0.155492	0	0	0	0	0	0	0.123848	0	0	0	0	0	0	0	0.158127	0	0	0	-0.118461
1509	ENSG00000162779.16	<AXDND1>	0.808278	0.993314	1.30968	0.0345537	0.0365339	0.645849	0.258744	0.828309	0.258837	0.242094	1.23848	0.528417	0.504086	0.647649	0.0939385	0.0190677	0.208488	0.268723	0.685217	0.650065	1.39699	-0.110872	-0.0399611
1510	ENSG00000103126.10	<AXIN1>	28.3425	26.6355	23.3123	20.5595	21.1166	23.4251	25.4124	16.5482	21.2986	20.284	23.5843	25.5225	24.5562	25.2223	27.2422	17.5423	23.9571	24.5792	38.8993	9.63953	25.163	-0.137112	-0.189896
1511	ENSG00000168646.8	<AXIN2>	6.02694	3.8261	3.62968	4.26739	2.22857	4.10201	2.14388	6.57245	8.09791	3.73516	1.41541	3.66369	1.1702	3.38217	2.34846	2.38346	4.05603	7.09428	5.79799	0.835797	5.98462	0.201494	0.352487
1512	ENSG00000167601.7	<AXL>	2.31941	6.47494	4.37807	19.782	3.87259	2.21683	1.53398	3.15117	4.2893	5.4644	4.84778	7.23931	4.37474	1.6551	4.33996	6.44487	9.47671	2.70514	2.63545	0.835797	2.56977	-0.0793483	0.18057
1513	ENSG00000160862.8	<AZGP1>	69.5119	108.161	9.78518	157.617	54.5999	91.1345	112.24	110.471	165.305	290.807	99.7865	38.504	52.767	122.46	121.838	56.4594	67.7585	52.2576	104.61	64.4678	80.0594	0.686008	0.472038
1514	ENSG00000141577.9	<AZI1>	28.3776	27.0218	15.8845	16.9313	17.7737	35.8184	29.2751	34.0507	30.2285	31.8872	31.3337	24.6418	31.6854	21.5343	23.6725	16.6651	18.1384	32.3722	20.539	33.1161	33.0448	0.222106	0.067935
1515	ENSG00000163512.9	<AZI2>	94.5861	72.0521	85.8028	88.7858	92.9239	91.0298	72.2266	87.7827	73.6762	71.8327	53.2194	71.8471	95.1642	75.1632	50.4637	98.9421	69.597	59.8535	112.797	90.7119	73.1607	0.244966	0.259699
1516	ENSG00000155096.9	<AZIN1>	14.2854	17.475	19.5517	52.7808	13.0974	27.5795	8.9082	24.9933	15.3823	29.9159	15.6403	26.2799	11.1079	13.1868	19.7834	30.3748	17.7973	19.2406	23.5961	2.916	8.64062	0.0553818	0.352018
1517	ENSG00000172232.5	<AZU1>	0.404139	0.827762	0.523872	0.0691075	0.127869	1.11714	1.86666	0.558208	0.388256	0.155632	0	0.915923	2.30439	0.917502	0.0939385	0.0381353	0.151627	0	0.368963	0.297172	3.55283	0.27415	-0.142236
1518	ENSG00000166710.13	<B2M>	8031.97	5887.96	13884.6	7101.26	6647.23	9982.94	6394.96	4671.36	5950.15	4868.77	6562.71	7268.62	9347.12	6467.73	9216.64	8608.08	6993.93	7332.62	4221.87	6227.73	6128.32	-0.100981	0.0689156
1519	ENSG00000169255.9	<B3GALNT1>	5.53495	0.790973	10.0471	7.6882	4.12833	5.93483	8.13196	8.26508	10.2426	5.41253	6.29858	8.4899	9.36159	7.51992	6.85751	7.68427	12.2629	11.9313	5.18306	3.88181	5.51896	-0.133418	-0.283091
1520	ENSG00000162885.8	<B3GALNT2>	15.1113	17.4566	10.4213	11.921	18.9063	16.0066	12.2164	15.9539	16.3992	15.3903	16.9319	28.9749	17.661	17.8283	13.9029	14.644	13.2484	20.5663	15.8478	3.43606	16.0222	-0.0309017	-0.196377
1521	ENSG00000172318.4	<B3GALT1>	1.66927	0.97492	1.36581	0.587413	0.602809	0.94259	1.33069	1.71064	2.36651	1.07213	0.973095	1.25059	1.06218	1.13339	0.770295	0.762707	1.08035	1.18238	1.80968	1.15154	2.03512	0.0588635	0.0921122
1522	ENSG00000162630.5	<B3GALT2>	0	0	0	0	0	0	0	0	0	0	0	0	0	0	0	0	0	0	0	0	0	0	1
1523	ENSG00000235863.2	<B3GALT4>	1.73956	2.46489	2.52581	1.62403	2.02763	0	3.32671	3.4933	1.53453	1.64278	1.46849	1.79662	2.97051	2.06888	0	1.33474	1.3836	2.43642	1.00147	0.798651	2.27657	0.276049	0.340707
1524	ENSG00000183778.13	<B3GALT5>	0.0702851	0.0367894	0.112258	0.0691075	0.109602	0.0174554	0.0184817	0.126047	0.11093	0	0.0176926	0.176139	0.0180031	0.0899512	0.0375754	0	0.0189534	0.0358297	0.122988	0.0185733	0.172468	0.0884183	0.0458427
1525	ENSG00000176022.3	<B3GALT6>	0	0	0	0	0	0	0	0	0	0	0	0	0	0	0	0	0	0	0	0	0	0	1
1526	ENSG00000187676.7	<B3GALTL>	0	0	0	0	0.219203	0	0	0	0.203372	0	0.212312	0.598873	0.216037	0.197893	0	0	0	0.483701	0	0	0	0	-0.481368
1527	ENSG00000109956.8	<B3GAT1>	30.4159	23.8947	8.23227	48.8935	13.0426	24.1233	47.0175	36.7157	34.6472	113.49	54.2456	39.596	0.504086	21.6603	54.9164	7.37919	38.5702	73.7913	35.8421	17.5517	35.5111	-0.1378	0.0964608
1528	ENSG00000112309.6	<B3GAT2>	0	0	0	0	0	0	0	0	0	0	0	0	0	0	0	0	0	0	0	0	0	0	1
1529	ENSG00000149541.5	<B3GAT3>	38.7622	39.2543	25.6136	32.1868	48.4987	15.2909	38.3126	35.3652	28.9158	45.1851	26.1143	33.0261	25.9964	27.2372	11.1975	9.72451	10.8224	36.4747	37.1072	26.8941	32.2342	0.446815	0.681166
1530	ENSG00000174684.6	<B3GNT1>	0	0	0	0	0	0	0	0	0	0	0	0	0	0	0	0	0	0	0	0	0	0	1
1531	ENSG00000170340.10	<B3GNT2>	4.7091	4.32276	0.0187097	6.56521	8.42106	0	11.7359	6.08627	0	0	0.0707705	3.59324	0	0	5.99327	9.91519	0	6.46726	3.51394	0	0	3.13553	0.276858
1532	ENSG00000179913.6	<B3GNT3>	0.105428	0	0	0	0	0	0	0.180067	0	0	0.194619	0	0	0.0359805	0	0	0	0.0358297	0.245975	0	0	0	-0.156417
1533	ENSG00000176383.8	<B3GNT4>	0.82585	1.83947	0.972905	0.639244	0.748945	0.820403	3.47457	1.3325	0.887442	0.708989	0.973095	1.30343	1.26021	1.40324	0.469692	0.400421	1.17511	0.913658	1.44071	1.09582	2.36281	-0.304214	0.0615533
1534	ENSG00000176597.7	<B3GNT5>	4.65639	3.78931	3.81678	2.67791	2.17377	4.0671	3.34519	4.68175	5.65744	5.2569	1.98158	5.14326	1.06218	2.5726	1.44665	3.29871	2.38813	1.37944	5.42903	1.76446	4.89808	0.621054	0.596759
1535	ENSG00000198488.6	<B3GNT6>	0.0351425	0	0	0	0	0	0	0	0	0	0	0	0	0	0	0	0.246395	0	0	0	0.137974	0	-0.365771
1536	ENSG00000156966.6	<B3GNT7>	0	0.110368	0	0	0	0	0	0	0	0	0	0	0	1.51118	0	1.01059	1.04244	0	0	0	0	0	-0.546383
1537	ENSG00000177191.2	<B3GNT8>	0.808278	3.29265	1.70258	0.812013	0.949881	0	1.64487	2.21483	0.831977	0	0.990788	0.968764	0.792135	0	2.53634	1.62075	3.84755	2.74097	0	0.538625	0	-0.0785544	-0.0302192
1538	ENSG00000237172.3	<B3GNT9>	0	0	0	0	0	0	0	0	0	0	0	0	0	0	0	0	0	0	0	0	0	0	1
1539	ENSG00000175711.4	<B3GNTL1>	13.0203	17.7693	10.6271	9.91692	12.4581	8.84987	11.2184	15.1617	10.6678	10.289	12.4556	14.7428	10.3518	16.9108	6.44418	11.2499	7.01277	20.8708	14.3017	4.73618	13.3317	-0.179099	-0.00695693
1540	ENSG00000135454.9	<B4GALNT1>	92.4951	67.7109	20.1878	91.5674	64.6102	62.6124	37.3331	53.1378	55.1693	102.665	54.5287	87.3297	19.1373	51.2542	48.9231	18.1524	33.0169	62.5408	59.1571	19.9477	63.1921	0.308903	0.524006
1541	ENSG00000167080.4	<B4GALNT2>	0	0	0	0	0	0	0	0	0	0	0	0	0	0	0	0	0	0	0	0	0	0	1
1542	ENSG00000139044.6	<B4GALNT3>	38.4284	19.2777	8.4755	39.6158	16.6046	23.3204	25.782	17.7546	24.9408	61.3708	35.1376	24.7299	1.89032	17.4865	17.9798	10.1059	12.206	29.7208	36.3165	9.11948	24.1972	0.414501	0.405889
1543	ENSG00000182272.7	<B4GALNT4>	114.354	53.2711	24.6033	162.8	160.347	76.8036	61.4887	26.866	45.4259	89.6612	79.2984	72.7278	1.24221	57.7307	148.423	9.74358	39.7643	75.8336	199.961	34.3234	87.8377	-0.0723466	0.106614
1544	ENSG00000086062.8	<B4GALT1>	0.105428	0	0.187097	0	0	0	0	0.324121	0.184884	0	0	0.669328	0.0720123	0	0	0.0762707	0.644416	0.322467	0.228406	0	0.120727	-0.204818	-0.406217
1545	ENSG00000117411.12	<B4GALT2>	81.7767	72.3464	59.8337	53.1609	66.9483	35.3122	86.4391	57.9816	78.0024	70.5876	80.9261	60.9969	33.5937	74.1378	114.53	54.6479	64.7259	77.643	105.33	62.6662	73.7989	-0.101151	-0.248859
1546	ENSG00000158850.10	<B4GALT3>	22.2277	22.7359	23.6304	43.0194	27.4004	17.1063	19.6276	23.6788	21.7238	34.9826	36.2522	31.4584	37.8244	45.4613	21.9628	33.1968	22.4029	28.1801	62.9873	22.1579	31.8892	-0.451656	-0.582562
1547	ENSG00000121578.8	<B4GALT4>	28.6236	39.2359	30.422	32.0486	29.1906	32.0306	31.881	39.5067	40.8223	32.527	34.6953	29.7851	16.1487	29.9358	33.2542	42.7116	29.1314	49.9466	27.0573	39.6911	66.0033	-0.0528711	-0.184562
1548	ENSG00000158470.5	<B4GALT5>	0	0	0	0	0	0	0	0	0	0	0	0	0	0	0	0	0	0	0	0	0	0	1
1549	ENSG00000118276.7	<B4GALT6>	1.21242	1.87626	2.33871	2.19416	2.00936	5.81264	2.40263	3.00712	4.43721	1.29693	3.29083	4.19211	3.06052	2.5726	2.17937	2.97456	4.1508	5.06991	5.78042	2.41453	4.57039	-0.454484	-0.538895
1550	ENSG00000027847.9	<B4GALT7>	15.6033	19.9951	16.2775	17.2941	19.162	18.5551	14.3973	17.6286	22.5928	18.8487	13.7118	21.2071	17.391	16.3531	10.8217	16.5317	13.9687	16.4458	29.1481	2.76742	32.7688	0.133737	0.0775352
1551	ENSG00000108641.10	<B9D1>	15.533	23.067	19.7575	17.7606	15.5452	24.071	29.4969	28.9188	22.4079	23.241	18.7542	26.3504	10.4958	29.0722	18.5998	16.7795	18.0626	21.0858	20.2754	26.6341	21.0583	0.161574	0.185342
1552	ENSG00000123810.3	<B9D2>	0.720422	0	0	0.621967	0.548008	0	0	1.00838	0.979884	0.518773	1.32695	0	0.522089	0	0.619994	0.991519	1.64895	0.913658	0	1.26298	0	-0.116105	-0.300892
1553	ENSG00000164929.12	<BAALC>	4.32253	4.08363	20.3562	17.2596	8.11052	20.4752	5.19337	3.60134	3.82709	4.20206	5.59087	7.96148	8.8215	4.29967	8.21022	8.54231	9.43881	7.09428	4.97222	8.13509	3.77704	-0.68641	0.288355
1554	ENSG00000136881.7	<BAAT>	0.193284	0	0.112258	0.0345537	0	0	0	0	0	0	0.106156	0.158525	0	0	0	0.152541	0.265348	0.0358297	0.052709	0	0.603636	-0.144592	-0.464866
1555	ENSG00000105393.11	<BABAM1>	116.603	114.691	116.711	99.0137	138.628	131.264	127.986	93.4548	104.274	115.825	108.456	121.36	93.0218	128.522	134.313	86.9104	114.327	122.717	117.401	83.7469	111.621	0.0235121	0.21476
1556	ENSG00000186318.12	<BACE1>	26.8665	28.475	31.7317	44.246	44.6809	60.9367	32.1028	33.3844	27.5662	39.2019	33.0145	36.496	26.6445	37.6176	32.2209	46.5823	24.6015	31.4227	33.8216	33.2833	27.888	-0.0117063	0.316664
1557	ENSG00000182240.11	<BACE2>	85.7302	93.1876	136.862	100.068	94.9881	99.7051	96.4747	70.9465	87.0617	87.2921	124.008	101.474	119.252	103.282	97.2639	95.1667	190.349	94.8054	155.421	82.8554	107.447	-0.133829	-0.568276
1558	ENSG00000156273.11	<BACH1>	11.5268	4.02844	7.1284	7.29084	11.91	1.48371	7.4851	6.37438	2.01523	5.84484	5.78549	11.8189	3.11453	3.688	8.77385	4.95759	4.52987	2.99178	2.7233	1.74589	7.1919	0.527737	0.28243
1559	ENSG00000112182.10	<BACH2>	10.8415	7.67059	5.72517	8.34472	5.68102	6.54577	4.99007	6.41039	3.67919	2.957	4.29931	9.96947	1.58427	0	5.29813	5.31988	5.51545	7.99003	5.49931	4.88477	2.12135	0.179819	0.417199
1560	ENSG00000002330.9	<BAD>	14.3909	19.0017	19.0091	14.6335	15.8922	9.67028	21.8824	16.7643	22.3155	22.2553	30.2367	26.2975	25.2583	16.533	27.6931	13.9194	33.0548	23.558	13.9679	22.4551	17.2295	-0.388148	-0.666946
1561	ENSG00000107262.12	<BAG1>	192.423	223.533	147.489	135.295	164.914	154.131	202.504	181.256	218.902	174.187	137.348	158.49	146.959	177.402	210.009	148.099	211.899	168.346	196.482	198.251	131.006	0.0779602	0.194773
1562	ENSG00000112208.10	<BAG2>	8.39907	7.76257	6.24905	25.0687	9.15174	17.5776	9.99862	7.36475	7.155	12.0874	20.1342	12.2769	17.1569	9.69674	6.19994	28.3155	16.6222	23.5939	12.5799	10.6796	11.3656	-0.495869	-0.479626
1563	ENSG00000151929.5	<BAG3>	2.0207	2.50168	4.15356	4.45743	3.92739	0	4.38017	1.80067	5.10279	0.276679	2.10542	4.91428	3.58261	3.14829	2.76179	2.57413	6.72847	3.88752	4.37485	1.96877	8.20945	-0.13631	-0.434854
1564	ENSG00000156735.6	<BAG4>	0.28114	0	0.299355	0	0.548008	0.45384	0.517489	0.270101	0	0.311264	0.583857	0.281822	3.24055	1.56515	0.450905	0	0.587556	1.21821	1.24745	0	1.17278	-0.460713	-0.705749
1565	ENSG00000166170.9	<BAG5>	2.38969	6.16223	9.6355	2.41876	1.16908	5.58572	4.10295	3.61935	0	4.01184	9.20017	5.09042	2.9345	2.37471	1.27756	14.1673	3.90441	6.66433	8.78484	0	8.76135	-0.373396	-0.363433
1566	ENSG00000204463.8	<BAG6>	327.722	286.902	293.705	309.1	364.243	276.092	409.297	308.671	381.156	350.31	331.808	358.584	374.554	357.412	454.38	271.352	308.41	318.472	420.179	396.242	327.361	-0.166452	-0.370745
1567	ENSG00000140320.7	<BAHD1>	22.6494	19.7375	14.8368	27.6603	19.7648	30.2676	18.9623	27.4062	14.1436	22.0824	18.6657	17.1559	19.5333	22.3619	15.3308	15.5974	19.8253	23.2177	20.7147	7.16928	13.487	0.160674	0.594245
1568	ENSG00000181790.6	<BAI1>	2.75869	11.6622	1.08516	4.02551	3.70819	3.64817	28.2031	8.13903	6.50791	6.53653	15.3749	6.65805	3.24055	1.72706	12.7944	1.62075	2.59662	10.3906	8.08205	7.55932	4.48416	-0.311819	0.0937857
1569	ENSG00000121753.8	<BAI2>	20.9625	12.1221	13.602	18.78	16.6229	11.2762	16.4857	16.8183	5.97174	10.704	15.5518	10.9558	3.40258	10.0026	26.7725	11.7648	5.42068	17.9507	13.5638	9.7324	20.9721	0.341825	0.1302
1570	ENSG00000135298.9	<BAI3>	24.2659	11.6622	7.14711	9.19129	13.7002	8.53568	7.35573	8.13903	9.02232	6.81321	3.66238	26.8612	4.1047	6.96222	13.9405	8.27537	4.79522	8.52747	9.62818	0.557198	15.5221	0.08051	0.137425
1571	ENSG00000175866.11	<BAIAP2>	91.476	201.128	113.212	110.14	68.9394	103.475	118.967	163.159	199.619	141.746	98.9549	103.394	77.5932	117.26	72.8399	126.705	77.9365	110.302	79.3622	141.64	183.971	0.166334	0.412203
1572	ENSG00000006453.9	<BAIAP2L1>	1.10699	2.55686	4.2284	1.48581	2.55737	3.33398	1.38613	2.39489	1.94128	3.16451	1.73388	2.25458	5.99502	2.37471	3.06239	1.84956	2.27441	2.43642	4.02346	0.538625	2.01787	0.101134	-0.104606
1573	ENSG00000128298.12	<BAIAP2L2>	8.03007	6.14383	8.88712	5.80503	3.50725	2.74049	4.2508	6.48242	3.47581	7.45303	7.32475	6.18248	3.15054	4.64148	5.0351	1.81143	5.06056	5.17739	5.97369	5.33053	6.3813	0.189524	0.222929
1574	ENSG00000007516.9	<BAIAP3>	7.87193	11.5519	4.54646	12.4048	3.37938	17.1412	6.48709	9.93971	9.31814	20.3013	9.99634	9.79333	14.0424	5.43305	2.72422	3.39404	3.65801	8.15126	7.29142	4.38329	6.00187	0.639554	0.548921
1575	ENSG00000030110.8	<BAK1>	19.2581	29.0085	17.3439	20.2485	22.5231	18.2932	26.1517	16.9263	23.055	20.0419	22.3458	16.9798	13.8444	24.7906	21.8689	24.521	24.0898	27.3739	28.0061	21.5636	19.3164	-0.146123	-0.165587
1576	ENSG00000095739.7	<BAMBI>	4.14682	4.56189	3.01226	1.123	4.05526	5.46353	23.6936	3.52932	4.43721	3.25097	3.48545	1.65571	0.900153	3.47212	5.46722	3.33684	2.38813	2.66931	2.75844	1.89447	9.17527	0.497779	0.344743
1577	ENSG00000175334.3	<BANF1>	159.108	173.517	159.014	290.441	198.47	120.774	173.58	174.935	186.696	207.284	197.061	176.949	144.007	151.784	264.794	142.016	202.934	161.126	182.496	119.965	170.691	0.0297494	0.176294
1578	ENSG00000125888.10	<BANF2>	0	0	0.65484	0	0	0	0	0	0	0	0	0	2.52043	0	0	0	0	0	0	0	0	0	-0.206234
1579	ENSG00000153064.7	<BANK1>	16.0601	4.45152	2.82517	12.4221	12.4215	11.1889	3.36368	8.15704	4.14139	8.81913	5.53779	9.31775	9.43361	5.82884	3.19391	11.6694	8.33951	5.87607	4.39242	5.29338	3.10442	0.506073	0.343736
1580	ENSG00000172530.15	<BANP>	36.3901	32.4667	21.5723	38.3028	22.0299	32.3797	32.1213	30.1432	32.7059	30.1061	30.9798	27.7595	23.1519	28.1727	23.0525	22.4236	34.0783	27.6068	26.3721	19.8177	22.2483	0.285408	0.705852
1581	ENSG00000163930.5	<BAP1>	118.325	100.637	91.4718	98.9619	107.939	82.4766	112.794	97.8125	112.224	95.8519	111.782	105.507	121.935	141.907	117.423	95.8913	113.341	99.0513	139.363	92.7921	169.708	-0.18271	-0.666061
1582	ENSG00000138376.6	<BARD1>	0.474424	3.36623	9.0555	1.01933	2.1555	12.4108	1.36765	0.270101	1.44209	1.66007	0.707705	5.21371	0	13.9604	0.526055	0.629233	6.14091	0.573276	3.90047	0	5.07055	0.764117	-0.00258837
1583	ENSG00000125492.5	<BARHL1>	0	0	0	0	0	0.593483	0	0.0900336	0	0	0	0	0	0	0	0.0953383	0	0	0	0	0	0	0.319612
1584	ENSG00000143032.7	<BARHL2>	0	0	0	0	0	0	0	0	0	0	0	0	0	0	0	0	0	0	0	0	0	0	1
1585	ENSG00000131668.9	<BARX1>	0	0	0.168387	0	0	0	0.406598	0.270101	0.369767	0.103755	0	0.123297	0.180031	0.179902	0.150302	0.152541	0.0947671	0.125404	0	0.130013	0	-0.180441	0.165119
1586	ENSG00000043039.5	<BARX2>	0	0	0	0	0	0	0	0.144054	0	0	0	0.123297	0.216037	0.071961	0	0	0	0.0716594	0	0.148586	0	0	-0.46807
1587	ENSG00000176788.7	<BASP1>	0	0	0	0	0	0	0	0	0	0	0	0	0	0	0	0	0	0	0	0	0	0	1
1588	ENSG00000156127.6	<BATF>	0	0	0	0.794736	0	1.97246	0	0	0	0.0345848	0	0.686942	0.88215	0	0	0	0.890811	0	0	2.19165	0.707117	0	-0.21822
1589	ENSG00000168062.5	<BATF2>	1.8977	0	1.27226	0	1.49789	1.85027	0	2.46692	2.51442	0.449603	1.57464	2.92391	2.52043	0.179902	1.91634	2.24998	3.35476	2.93804	2.30163	3.36176	0.724364	-0.571644	-0.68538
1590	ENSG00000123685.4	<BATF3>	12.9676	5.95989	1.40323	5.90869	9.15174	2.75795	9.3148	4.75377	7.69116	6.29444	9.8371	3.22334	4.42875	17.2347	9.97626	0.89618	5.15533	6.00148	21.3296	8.11652	17.6262	-0.378714	-0.379376
1591	ENSG00000087088.15	<BAX>	60.6384	120.265	128.031	116.463	115.739	56.7823	111.371	77.5909	90.4451	94.0016	94.4964	77.1489	89.2772	93.0635	132.735	104.357	100.131	132.427	115.503	81.3324	78.4037	0.119307	-0.0858424
1592	ENSG00000198604.6	<BAZ1A>	26.2163	20.4917	31.8252	19.9548	30.8894	39.1524	25.8375	30.5034	22.7777	21.0276	22.5758	24.272	37.6084	56.5433	30.0603	38.0591	27.4067	23.576	36.949	19.9477	34.7005	-0.204203	-0.420082
1593	ENSG00000009954.6	<BAZ1B>	13.1257	16.1322	15.7723	17.4496	18.5775	16.6873	10.3683	15.7379	12.7385	10.4446	11.3056	20.1855	14.9425	15.4176	11.3666	15.4448	15.5039	16.5354	16.3222	3.67751	11.883	0.0302642	0.161909
1594	ENSG00000076108.7	<BAZ2A>	251.867	143.626	124.307	204.057	207.092	228.438	68.0867	173.297	156.652	144.063	147.061	196.307	173.622	174.541	102.299	98.1222	128.409	145.29	178.982	25.9654	134.111	0.18272	0.458305
1595	ENSG00000123636.13	<BAZ2B>	86.9778	47.4216	52.6117	64.9092	61.3404	71.8463	29.7926	62.5553	53.3205	66.9908	49.504	83.4723	59.1401	33.4978	22.8834	42.8641	35.8788	49.1046	43.8891	15.1929	63.9165	0.492448	0.585858
1596	ENSG00000105327.11	<BBC3>	15.7614	11.699	15.1549	16.223	14.7597	11.8871	13.8059	11.4343	13.8108	16.1857	18.3473	16.8917	9.12755	19.1596	18.2616	8.04656	17.3613	16.195	15.9884	5.9063	5.27751	-0.17526	0.0674914
1597	ENSG00000214413.3	<BBIP1>	74.0629	67.3062	57.7756	69.3839	58.4542	73.8711	90.4311	75.6822	63.4151	59.0017	54.0687	69.2402	59.7522	72.0149	91.3457	76.2135	53.0696	56.4318	54.8525	61.3847	77.4552	0.153771	0.185483
1598	ENSG00000129151.4	<BBOX1>	0.82585	1.43479	0.580001	1.33032	1.09602	1.86773	2.14388	0.738275	2.08919	1.02025	1.69849	1.10968	0.342058	0.791571	3.28785	2.70761	3.12732	0.949488	0.685217	4.14184	1.17278	0.0344191	-0.362534
1599	ENSG00000174483.15	<BBS1>	38.2526	41.6088	31.3014	52.3143	55.1114	81.1151	21.4573	34.915	29.2301	39.7899	46.7616	46.5007	29.327	50.7865	33.8742	25.9892	29.5673	45.3604	51.2156	16.233	28.3364	0.201302	0.280441
1600	ENSG00000179941.6	<BBS10>	0	0	0	0	0	0	0	0	0	0	0	0	0	0	0	0	0	0	0	0	0	0	1
1601	ENSG00000181004.5	<BBS12>	0	0	0	0	0	0.698215	0	0	0	0	0	0	0	0	0	0	0	0	1.66912	0	0.482909	0	-0.224296
1602	ENSG00000125124.7	<BBS2>	218.762	178.484	177.125	134.535	168.439	276.406	157.002	263.636	182.61	241.471	127.228	202.683	95.5963	281.673	105.098	77.0715	97.3069	131.853	212.611	125.852	477.787	0.50329	0.188689
1603	ENSG00000140463.9	<BBS4>	36.9348	40.9466	28.102	39.0112	42.5802	98.2563	25.9853	39.5427	36.2927	43.0927	40.5692	60.6446	27.7247	62.8759	17.8483	39.7179	20.0338	39.3948	51.321	20.1334	47.3078	-0.0159069	0.163192
1604	ENSG00000163093.7	<BBS5>	32.05	20.7492	24.9962	10.5907	19.5456	34.038	25.5602	23.5528	21.1137	21.1832	23.4781	23.3208	16.4728	38.2293	14.2974	13.7669	19.7305	27.9114	28.7616	17.4403	33.1483	-0.0588919	0.00150497
1605	ENSG00000138686.5	<BBS7>	9.64663	15.8562	8.41937	14.9445	15.3625	5.42862	8.5016	9.30947	10.5384	10.6003	7.13013	10.2689	10.3338	7.376	21.3052	13.8241	18.8397	8.70662	7.25628	7.42931	15.9877	-0.0238283	-0.133189
1606	ENSG00000122507.16	<BBS9>	16.9738	11.1288	11.6562	15.5665	19.8744	30.4771	14.12	10.9121	20.5776	17.3616	14.8618	17.6844	15.4286	9.10306	13.8277	11.3643	15.8261	14.1348	12.5623	8.91517	21.11	0.19649	0.404132
1607	ENSG00000114439.14	<BBX>	29.7833	23.4165	28.3265	34.4155	27.3091	35.8533	17.0956	22.8865	28.1208	21.5982	20.5765	36.9011	26.0144	25.852	17.1156	29.8981	24.0329	33.6979	20.9431	13.3542	16.7811	0.201739	0.297336
1608	ENSG00000187244.6	<BCAM>	84.7638	109.706	48.9259	196.265	63.5324	112.814	103.442	117.638	108.749	163.31	167.779	158.173	271.234	142.429	75.4514	66.5271	130.4	110.947	108.001	45.9503	181.022	-0.254538	-0.28254
1609	ENSG00000132692.14	<BCAN>	0.404139	0.0183947	0.0561291	1.58947	0.310538	4.01474	1.20131	0.180067	0.240349	0.760866	0.548472	0.810239	0.756129	0	0.356966	0.228812	1.23197	0.734509	0.983902	0.260026	0.327688	-0.290351	0.244737
1610	ENSG00000075790.6	<BCAP29>	48.0574	42.7861	52.724	72.701	64.0439	51.1617	62.6716	37.3639	63.8958	39.8071	44.267	45.0211	48.7523	67.8052	66.8654	100.391	64.1005	59.4953	58.0502	40.434	41.8579	-0.158929	-0.208485
1611	ENSG00000185825.11	<BCAP31>	156.648	259.936	181.166	120.437	159.525	127.616	215.497	218.746	267.249	182.089	188.586	134.535	163.504	144.318	206.345	235.352	189.856	168.238	191.246	170.335	203.926	-0.0540908	0.126679
1612	ENSG00000050820.12	<BCAR1>	47.9168	40.6707	36.7085	68.9347	35.4379	28.9585	36.5754	48.1139	35.4607	73.2853	54.4579	82.3802	31.8654	42.7988	28.0876	19.2202	48.1227	52.6518	48.3166	14.84	64.865	-0.311161	0.035306
1613	ENSG00000137936.12	<BCAR3>	19.4865	14.6606	20.9549	24.4986	24.1124	30.2676	31.8995	19.6093	19.2649	26.198	19.285	23.9197	29.8851	26.7875	11.949	21.5465	14.4804	33.2858	17.3764	20.4306	32.3894	0.063194	0.0278344
1614	ENSG00000064787.8	<BCAS1>	313.63	204.733	134.542	215.252	72.5198	231.004	250.575	169.029	290.545	497.641	192.478	200.675	4.17671	164.719	227.557	91.9443	193.382	262.148	169.442	78.9364	150.047	0.396061	0.584067
1615	ENSG00000116752.5	<BCAS2>	19.8907	22.6439	16.4833	21.4233	21.5002	27.1257	14.7115	12.8748	14.5134	12.2776	14.2603	20.8901	12.5301	14.2123	18.1113	11.5169	20.1854	21.0679	11.9474	18.8147	18.1436	0.00585101	0.298489
1616	ENSG00000141376.16	<BCAS3>	25.2851	36.2744	30.2536	25.4143	24.0941	24.1931	23.5827	36.0674	37.1986	33.0631	28.0251	41.0052	29.219	37.5456	23.184	38.7836	26.3642	32.2467	24.2637	26.9498	23.2831	-0.00970249	-0.062573
1617	ENSG00000124243.13	<BCAS4>	4.12925	4.26757	3.51743	5.45949	1.68056	1.86773	4.58347	3.79942	4.58512	4.58249	6.4932	5.84781	7.36325	2.35672	3.363	6.15886	6.14091	9.06492	1.63398	3.91896	3.75979	-0.434087	-0.487217
1618	ENSG00000060982.10	<BCAT1>	0.562281	2.83279	4.54646	0.708351	1.09602	4.64313	0.924087	3.51131	1.44209	0.0345848	1.52157	2.74777	1.44025	2.66256	0.450905	2.65041	0.985578	0.680765	1.87996	1.05868	0.206961	-0.13326	0.284089
1619	ENSG00000105552.10	<BCAT2>	58.0203	69.1273	23.7613	75.4653	46.9826	57.9868	93.8318	94.1931	64.1546	156.808	68.7359	52.8769	48.1942	66.0782	59.2939	40.4997	66.2043	65.4072	122.917	100.686	34.7177	0.0267585	0.182999
1620	ENSG00000107949.12	<BCCIP>	46.353	41.3881	32.6297	48.8071	47.0374	35.2599	44.0974	30.7014	43.2443	50.4074	30.8206	39.7898	30.7132	45.9291	61.1351	42.8832	40.5224	42.7449	44.4161	35.1035	26.4048	0.106682	0.166534
1621	ENSG00000186666.4	<BCDIN3D>	0.720422	1.06689	0.149678	1.95229	1.60749	0	0	0.324121	0.942907	0.415018	0.460008	0.281822	0.162028	0.179902	0.582418	0.476692	0.568603	0.806169	0.702787	0.11144	0.63813	0.128558	0.37346
1622	ENSG00000114200.5	<BCHE>	0.860992	0.220737	0.916776	5.01029	1.15082	2.79286	1.5155	0.990369	0.998372	1.33152	4.06931	2.34265	0.180031	0.827551	0.507268	1.08686	1.26988	3.76212	0.614939	3.15746	0.517403	-0.0111917	-0.0441144
1623	ENSG00000248098.6	<BCKDHA>	50.658	82.8498	61.3492	49.7746	48.4074	70.2055	95.7724	97.3263	72.5669	87.6726	73.0175	60.2571	68.4116	68.4169	35.7718	45.6099	65.0292	67.2524	85.6698	119.612	64.8823	0.0854427	0.109197
1624	ENSG00000083123.10	<BCKDHB>	6.3608	18.4131	10.9265	7.89553	12.4763	18.5551	14.2309	21.536	22.1676	10.9634	12.7564	7.89103	24.6102	17.5225	12.0805	17.5232	12.1112	8.72454	5.49931	10.141	12.0555	0.139076	0.199699
1625	ENSG00000103507.9	<BCKDK>	57.1593	90.2812	59.2537	60.9009	54.8374	62.4204	82.0959	59.008	75.8023	80.7037	76.0253	51.6439	42.5412	87.9543	77.2174	61.7792	80.2867	73.863	98.6713	102.042	42.9272	-0.299934	-0.166637
1626	ENSG00000142867.8	<BCL10>	0	0	0	0	0	0	0	0	0	0	0	0	0	0	0	0	0	0	0	0	0	0	1
1627	ENSG00000119866.16	<BCL11A>	0.0351425	0.441473	0.355485	0	0.566275	1.27424	0.277226	0.648242	0.480698	0.50148	0.495394	0.31705	0.630107	0.827551	0.24424	0.133474	1.30779	0.788254	1.37043	0.297172	0.155221	-0.0506028	-0.244052
1628	ENSG00000127152.13	<BCL11B>	0.263569	0.165552	0.710969	0.207322	0.219203	0.610938	0.129372	0.306114	0	0.0691697	0.477701	0.123297	0	0	0	0.305083	0.132674	0.322467	0.404103	0.222879	0.448416	-0.019321	0.16345
1629	ENSG00000171791.10	<BCL2>	40.8708	47.1089	61.7608	65.5484	44.0416	49.0845	46.8142	37.8861	48.1622	43.3175	21.2312	37.9756	14.1864	38.2293	42.4414	32.9299	29.8706	35.0056	29.2887	38.2795	32.3032	0.505622	1.37164
1630	ENSG00000140379.7	<BCL2A1>	0	0	1.98323	0	0	0	0.813196	0	0.499186	0	0	0.757398	0.23404	0	1.01454	0	0	0	0.685217	0	1.31075	0	-0.0409903
1631	ENSG00000171552.8	<BCL2L1>	92.4073	99.7545	125.318	86.367	78.3286	104.069	133.383	109.679	144.228	77.3317	57.5364	86.6075	156.645	133.128	97.2827	110.04	120.278	97.9585	105.611	118.089	103.222	-0.0511978	-0.0804576
1632	ENSG00000137875.4	<BCL2L10>	0	0	0	0	0	0	0.184817	0	0	0	0	0	0.162028	0	0	0	0	0	0	0	0	0	0.0615751
1633	ENSG00000153094.17	<BCL2L11>	16.64	12.0669	28.1768	26.2263	17.6459	20.3355	11.3293	15.5758	10.1316	15.4594	14.968	21.2247	15.4286	15.9034	11.7799	14.091	13.1726	20.6917	11.1567	8.00508	14.4528	0.151456	0.381355
1634	ENSG00000126453.5	<BCL2L12>	23.3874	21.1907	23.0317	20.5767	23.5461	25.8689	24.9319	12.9288	17.9152	18.2954	23.5135	29.5561	25.2763	33.7137	23.0149	11.7838	24.8669	25.6541	32.7675	24.9996	17.6262	-0.17344	-0.49157
1635	ENSG00000099968.13	<BCL2L13>	33.3151	37.8931	47.3543	29.9408	38.3971	45.0174	37.2037	41.8476	44.8898	21.408	33.8991	35.9147	50.7146	37.9594	36.1663	56.0589	43.8582	45.3783	47.1922	37.7595	50.395	-0.198916	-0.507882
1636	ENSG00000121380.8	<BCL2L14>	0	0	0.0561291	0	0.0730678	0	0	0.0720269	0.0739535	0	0.0707705	0.0880695	0.522089	0.359805	0	0.209744	0	0.125404	0	0	0.310442	-0.234059	-0.688112
1637	ENSG00000188761.7	<BCL2L15>	0.298712	1.48997	1.21613	0.55286	2.68524	2.40884	1.07194	3.61935	1.34965	1.33152	1.09694	3.50517	0.486083	0.70162	0.507268	0.667368	1.08035	2.14978	0.579799	0.241453	1.19003	0.615183	0.355381
1638	ENSG00000129473.5	<BCL2L2>	6.37837	6.36457	4.06001	5.8223	12.7503	0.994956	3.30823	7.7789	6.52639	2.19614	6.54627	16.0463	8.85751	17.2526	8.28537	5.68216	5.07952	6.46726	8.25775	0.835797	3.41486	-0.0958302	-0.382197
1639	ENSG00000258643.1	<BCL2L2-PABPN1>	7.92464	4.10202	4.97678	5.78775	9.73628	11.1365	2.25477	8.71525	1.99674	6.58841	10.6156	7.52113	10.4418	5.25315	2.21695	3.8898	7.14544	9.72777	14.6531	0.668638	14.677	-0.262214	-0.280801
1640	ENSG00000069399.8	<BCL3>	136.617	34.8212	24.5097	51.4159	81.2696	25.5896	66.0907	22.4364	41.0812	74.4439	95.8764	55.7304	51.6868	99.0723	133.844	21.0888	87.4322	38.6244	166.209	23.7738	273.482	-0.911469	-0.476277
1641	ENSG00000113916.13	<BCL6>	399.412	346.704	459.548	758.817	472.968	654.664	204.667	849.359	445.255	275.831	214.877	245.943	992.833	519.45	219.966	542.78	315.783	160.087	681.616	233.336	423.166	0.517982	0.222702
1642	ENSG00000161940.6	<BCL6B>	1.17727	1.41639	0.916776	1.77952	0.730678	0.45384	2.80922	0.612228	0.813488	5.36065	7.48398	10.2161	9.61364	9.44488	3.92663	1.27753	4.51092	5.01616	6.79947	0.575771	8.24395	-2.23829	-1.23686
1643	ENSG00000110987.4	<BCL7A>	1.91527	2.7776	3.03097	2.85068	1.24215	4.39875	2.55048	2.75503	2.60686	4.27123	2.74236	2.27219	3.60061	3.74197	1.18362	2.99362	2.38813	2.84846	3.68963	1.61587	2.46629	0.0106201	0.123515
1644	ENSG00000106635.3	<BCL7B>	58.7759	84.7628	65.4092	84.6394	71.8073	64.6023	81.7632	66.967	103.11	68.4088	73.5129	72.3755	96.8205	102.239	99.3117	87.4634	91.6209	62.075	92.1354	69.0554	81.1632	-0.31707	-0.490525
1645	ENSG00000099385.7	<BCL7C>	14.2854	10.8713	15.6226	12.0074	11.8918	10.7351	9.09302	10.1558	14.5503	13.0731	13.5526	18.2832	8.49745	10.7941	21.1174	10.6207	13.3811	13.1495	10.3134	5.81343	12.09	-0.0161761	-0.0589229
1646	ENSG00000116128.5	<BCL9>	1.75713	6.56691	4.19098	0	2.88618	0	1.73728	1.90871	5.13977	0	0.955402	4.6853	1.94433	2.60859	3.34421	1.98304	1.25093	1.86315	1.3353	0	4.96707	-0.0673033	0.0555805
1647	ENSG00000186174.8	<BCL9L>	12.8973	35.0603	17.1007	11.7483	14.5953	12.1489	12.0501	31.6558	24.8669	22.2899	13.2518	24.3952	22.5038	17.7744	4.28359	32.11	16.2052	40.2368	12.1582	0.928664	18.1953	-0.160708	0.0753078
1648	ENSG00000029363.11	<BCLAF1>	145.666	102.845	125.767	139.407	122.681	177.172	82.8352	111.209	122.116	105.051	78.573	128.123	138.498	163.747	70.5666	122.319	91.6209	99.8574	133.863	71.3399	138.819	0.000929364	0.267485
1649	ENSG00000135697.5	<BCMO1>	0.0175713	0.165552	0	0.449198	0.0730678	0	0.166336	0.288107	0.166395	0.0691697	0	0.0176139	0.0360061	0	0	0.705504	0	0.214978	0.456812	0	0.206961	0.258786	-0.0302709
1650	ENSG00000197580.7	<BCO2>	21.1558	12.9683	9.35486	33.2925	15.4904	18.2932	18.0012	19.1952	20.67	26.4401	36.2876	25.6811	14.1324	24.053	15.2744	13.5952	13.6844	32.1751	16.6912	24.1638	24.2489	-0.351473	-0.225932
1651	ENSG00000183337.12	<BCOR>	37.9188	43.062	36.4839	28.2304	41.1554	45.6633	42.5819	29.6751	41.2106	49.6984	47.717	54.8673	36.8523	40.3701	29.9664	46.1628	40.0675	53.6729	26.4775	27.8042	29.1643	0.0391331	0.0157999
1652	ENSG00000085185.11	<BCORL1>	21.4545	17.8981	11.4503	24.3949	17.9016	12.2362	14.8039	17.1604	22.0566	16.0301	19.108	22.6339	15.8787	21.1205	14.9738	19.5253	21.967	29.2191	16.8669	7.96793	5.27751	-0.121108	-0.0183745
1653	ENSG00000186716.15	<BCR>	55.8239	99.1291	47.504	48.5134	57.5043	49.8176	65.832	83.6592	87.1912	51.8081	47.3278	39.6137	43.2974	86.2632	28.5949	64.8682	86.3518	48.5851	105.769	57.7257	84.9058	-0.026547	0.0536594
1654	ENSG00000074582.8	<BCS1L>	104.321	118.609	58.5427	94.8154	131.96	84.3444	83.3711	105.627	109.507	108.527	93.081	112.57	83.5162	129.296	79.5471	79.7982	75.5294	105.465	127.96	84.1369	108.637	0.172601	0.0639325
1655	ENSG00000161267.7	<BDH1>	17.7294	41.4433	10.8703	12.8367	19.2716	42.2595	33.1378	33.2044	36.1817	32.0256	16.0295	20.9782	19.0292	41.2876	15.0114	36.1142	19.3514	16.9654	23.6664	37.5923	12.7971	0.736787	0.284019
1656	ENSG00000164039.10	<BDH2>	48.7251	62.45	110.5	22.1317	57.4678	140.952	49.4756	103.755	87.8198	51.5141	72.1683	70.9664	146.437	73.4542	42.9487	64.258	35.7083	58.6891	49.9155	39.5611	99.9104	-0.0991041	0.102493
1657	ENSG00000100739.6	<BDKRB1>	0	0	0	0	0	0	0	0	0	0	0	0	0	0	0.263028	0	0	0	0	0	0	0	-0.285304
1658	ENSG00000168398.5	<BDKRB2>	3.49668	6.10704	7.18453	3.97368	5.75409	20.6672	5.72934	4.46567	10.1686	17.2578	18.595	10.7621	10.7478	5.55899	8.45446	16.9512	11.5995	20.19	12.7556	1.33728	11.2621	-0.871132	-0.392908
1659	ENSG00000176697.14	<BDNF>	0.439282	0.459868	2.07678	0.310984	0.383606	1.16951	1.5155	0.378141	0.22186	0.553357	0.371545	1.07445	0.23404	0.539707	0.150302	0.152541	0.435929	0.376212	0.404103	0.408612	0.655377	0.070795	0.466594
1660	ENSG00000145734.14	<BDP1>	30.3104	20.4733	27.6343	28.3341	28.2042	42.3118	22.8619	25.7496	26.7157	28.2212	23.1066	34.8227	26.8426	36.2683	17.6229	28.4299	23.3127	29.3983	31.5551	23.6438	27.5603	0.018335	0.0724063
1661	ENSG00000166546.9	<BEAN1>	2.21398	3.31105	4.71485	1.72769	3.03231	1.1346	1.57095	4.12354	2.75477	1.74653	3.57391	4.10404	3.18654	5.91879	1.70968	1.67795	1.25093	3.24259	3.28553	0.854371	3.62182	-0.326609	-0.166719
1662	ENSG00000126581.8	<BECN1>	120.908	119.069	100.452	89.8397	120.635	119.115	123.624	114.721	142.786	58.1544	58.4565	107.198	116.012	162.56	92.4354	97.7599	107.959	96.3999	138.449	92.9221	178.159	0.15113	-0.061658
1663	ENSG00000183092.11	<BEGAIN>	10.5603	8.42478	13.2278	8.84575	5.46182	41.6834	15.5986	13.7751	13.2562	15.3038	13.411	9.37059	5.36491	13.4747	6.08721	4.63344	3.46848	16.3204	5.35875	3.08316	20.1442	1.06085	0.470052
1664	ENSG00000177324.9	<BEND2>	0	0.0367894	0.0374194	0	0	0	0.0369635	0.16206	0.0369767	0	0	0	0	0	0.0751508	0.0190677	0	0	0	0.0928664	0	0.0521229	0.245984
1665	ENSG00000178409.9	<BEND3>	0	0	0.261936	0	0	0	0	0	0.203372	0	0.176926	0	0	0	0	0	0	0	0	0	0	0	0.277033
1666	ENSG00000188848.11	<BEND4>	0.28114	0.183947	0.112258	0.656521	0.0730678	0.48875	0.240263	0.342128	0.22186	0.397726	0.548472	0.211367	0	0.323824	0.469692	0	0.77709	0.107489	0.210836	0.0742931	0.241455	0.0967367	0.103207
1667	ENSG00000162373.8	<BEND5>	10.6833	11.4599	8.53163	5.56315	7.05104	12.9519	6.5795	9.9217	5.84232	8.24848	11.3941	13.8093	14.0964	8.41943	4.82844	4.46183	7.94149	19.9034	8.78484	9.23092	11.1414	-0.130383	-0.32934
1668	ENSG00000151917.13	<BEND6>	7.53807	2.18897	3.21807	8.08557	4.80421	9.65282	4.01054	2.32287	2.47744	7.2974	4.05161	7.39784	0.324055	6.58443	4.05814	2.63134	2.88092	6.01939	4.40999	2.13593	2.50078	0.108572	0.360437
1669	ENSG00000165626.12	<BEND7>	20.7517	25.6238	29.973	31.4266	15.052	27.3526	19.9788	23.5528	29.2671	26.7514	22.0627	30.8772	28.7149	20.6528	21.6058	23.9109	19.939	24.9912	22.3135	18.1275	17.7986	0.242229	0.328006
1670	ENSG00000167995.11	<BEST1>	95.4296	94.6776	45.5769	203.124	61.5048	106.216	130.721	145.458	117.179	149.458	71.2659	66.2635	22.3598	114.724	139.987	37.6968	72.421	67.5749	130.49	101.874	103.032	0.621635	0.520903
1671	ENSG00000039987.2	<BEST2>	0	0	0.467743	0	0	0	0	0.234087	0	0.121047	0	0	0	0	0	0	0	0	0	0	0	0	0.528704
1672	ENSG00000127325.14	<BEST3>	0.0351425	0	0	0	0.0365339	1.30915	0.129372	0	0	0	0.106156	0.31705	0	0	0	0	0	0.161234	0	0.0742931	0.241455	0	0.165025
1673	ENSG00000142959.4	<BEST4>	0	0	0	0	0	0	0	0	0	0	0	0	0	0	0	0	0	0	0	0	0	0	1
1674	ENSG00000105829.7	<BET1>	12.1242	6.21741	10.7207	22.4772	8.74986	28.6094	7.1894	7.70687	5.28767	9.71834	8.19169	7.89103	9.59563	9.66076	5.22298	9.22875	5.57231	9.51279	12.3515	4.29043	7.50234	0.163411	0.474709
1675	ENSG00000177951.13	<BET1L>	80.4237	81.5621	79.7595	80.3547	76.9038	101.8	83.981	75.3221	75.4141	71.6944	75.3883	73.9784	77.7012	80.5783	72.652	73.5631	80.3815	82.0142	86.4955	70.2813	64.2269	0.086134	0.447493
1676	ENSG00000133169.5	<BEX1>	0	0	0	0	0	0	0	0	0	0	0	0	0	0	0	0	0	0	0	0	0	0	1
1677	ENSG00000133134.7	<BEX2>	12.5107	7.33949	9.67292	9.98603	3.52552	16.5826	13.1775	1.94473	10.9451	12.0355	8.68708	6.79896	2.46642	6.00874	14.2974	2.91735	16.0346	13.3824	3.03955	6.27777	5.26026	0.694099	0.310316
1678	ENSG00000102409.9	<BEX4>	91.5463	89.0672	120.696	85.2613	54.5634	100.037	92.8892	62.6994	77.5402	62.3565	61.6588	88.9678	52.965	69.4064	82.9664	115.264	94.3312	105.769	72.8439	110.288	71.7292	0.0707925	-0.0185702
1679	ENSG00000184515.6	<BEX5>	0	0	0.598711	0	0	0	0	0	0	0	0	0	0	0	1.20241	0	0	0	0	1.20726	0	0	-0.301968
1680	ENSG00000103429.6	<BFAR>	35.002	49.5186	76.1111	32.9815	41.2285	75.6516	50.104	48.5101	46.6277	35.4322	39.2069	43.7001	72.0303	62.8219	33.7991	81.6287	57.3531	32.3542	45.769	37.0351	56.1554	0.0550568	-0.0873514
1681	ENSG00000125864.7	<BFSP1>	0.808278	1.28763	1.98323	0	0	1.83281	3.19734	1.83668	0	1.26235	0	1.58525	2.9525	0.251863	1.23999	0	0.60651	2.11395	1.10689	0	0.482909	0.681793	0.197216
1682	ENSG00000170819.4	<BFSP2>	0	0	0	0	0	0	0	0	0	0	0.247697	0	0	0	0.601206	0	0	0.161234	0.386533	0	0	0	-0.611055
1683	ENSG00000242252.1	<BGLAP>	3.83054	0.919736	1.94581	10.0724	2.1007	1.62335	4.10295	2.82705	0.739535	4.59978	4.37008	7.16886	3.36657	3.70599	3.60724	1.81143	3.3358	4.72952	6.4305	5.12622	0.931325	-0.50496	-0.23646
1684	ENSG00000182492.11	<BGN>	0.404139	3.21907	1.40323	7.53271	1.97283	5.39371	1.40461	2.64699	3.30942	1.19318	6.10396	4.79098	4.17671	1.92496	3.06239	11.3071	4.07499	3.67255	2.37191	41.697	5.8639	-0.734971	-0.450864
1685	ENSG00000180535.3	<BHLHA15>	0	0	0	0	0	0	0	0	1.03535	0	0	0	0	0	0	0	0.151627	0	0.210836	0	0	0	0.212557
1686	ENSG00000205899.3	<BHLHA9>	0	0	0	0	0	0	0	0	0	0	0	0	0	0	0	0	0	0	0	0	0	0	1
1687	ENSG00000198908.7	<BHLHB9>	2.67083	2.17058	3.14323	5.13123	1.37002	7.61054	1.88514	1.92672	3.54977	3.54495	2.45928	2.92391	2.3224	1.94295	3.00603	4.06141	2.36918	6.96888	3.7072	2.74884	2.25932	0.068589	0.0599542
1688	ENSG00000180828.1	<BHLHE22>	0	0	0	0	0	0	0	0	0	0	0	0	0	0	0	0	0	0	0	0	0	0	1
1689	ENSG00000125533.4	<BHLHE23>	0	0	0	0	0	0	0	0	0	0	0	0	0	0	0	0	0	0	0	0	0	0	1
1690	ENSG00000134107.4	<BHLHE40>	111.507	31.7309	20.4684	117.621	72.3005	38.8382	40.6044	23.7509	40.9517	73.8905	117.284	179.204	55.7735	44.5798	78.401	28.754	72.9707	102.778	133.143	6.01774	162.361	-0.934669	-0.489994
1691	ENSG00000123095.5	<BHLHE41>	3.40883	1.08529	10.9265	1.76224	8.71333	0	4.84222	5.47404	0	3.32014	12.9687	10.0399	2.73647	2.69854	8.17265	0.762707	2.93778	7.36301	2.75844	0	3.74255	0.168799	-0.176898
1692	ENSG00000145692.10	<BHMT>	0.42171	0.993314	0	0	0.23747	0.733126	0.499007	0.522195	1.1093	0	0	0	1.51226	1.63711	0.263028	0	0.587556	1.61234	0.913623	1.35585	0.724364	-0.350387	-0.422365
1693	ENSG00000132840.5	<BHMT2>	40.1328	20.4733	25.9317	32.8606	13.2801	66.121	23.0652	53.57	28.0653	22.826	51.8925	33.3431	32.8736	23.3333	22.0192	35.4087	20.6971	44.9126	33.0837	32.3732	41.5819	-0.288408	-0.0601641
1694	ENSG00000122870.7	<BICC1>	25.8649	21.0068	44.6788	16.3266	24.2585	29.936	22.1042	28.3066	23.1105	14.1106	28.3436	28.0061	15.3026	21.1026	19.8022	51.2158	24.6015	30.7956	31.2389	85.9757	42.4443	-0.25417	-0.43781
1695	ENSG00000151746.9	<BICD1>	85.6951	52.6089	26.9607	55.7179	62.4364	53.5356	67.7171	42.892	61.3814	63.1519	43.5062	69.4164	12.9802	50.0309	66.9218	31.8239	30.6856	57.453	43.8891	17.6446	40.4091	0.424222	0.62388
1696	ENSG00000185963.9	<BICD2>	27.0422	22.5887	26.6801	24.2567	22.7789	18.4154	26.854	24.5071	27.6771	20.8201	25.5128	30.7891	23.0979	24.7366	31.1876	28.5443	24.0709	31.2793	25.9328	23.8109	17.2812	-0.0641223	-0.356966
1697	ENSG00000015475.14	<BID>	17.9403	14.1639	20.9549	21.9762	22.0665	22.5349	18.2784	18.673	17.3236	15.8917	22.0096	15.1656	28.1208	28.7304	25.1004	30.6608	27.9753	17.467	38.952	23.8667	14.539	-0.432011	-0.741211
1698	ENSG00000100290.2	<BIK>	0	0	0	0	0	0	0	0	0	0	0	0	0	0	0	0	0	0	0	0	0	0	1
1699	ENSG00000136717.10	<BIN1>	203.598	309.841	263.395	250.134	322.119	138.892	319.826	226.957	307.573	274.863	162.613	187.553	78.9794	234.395	262.577	157.613	173.234	167.558	189.032	281.589	134.973	0.634094	0.934635
1700	ENSG00000110934.6	<BIN2>	2.79383	3.4766	8.15744	1.22666	3.17845	9.25135	3.40064	2.55695	2.12616	0.380433	3.99854	1.42673	4.7168	3.54408	0.901809	1.9449	3.24104	3.65463	3.21525	1.98734	1.328	-0.0918294	0.29978
1701	ENSG00000147439.7	<BIN3>	78.6314	111.03	125.037	80.251	146.099	105.745	136.765	56.8112	97.2673	95.2293	69.709	60.0105	80.1496	113.303	124.506	77.3003	71.7956	49.9466	114.062	39.3382	108.775	0.390806	0.519811
1702	ENSG00000110330.4	<BIRC2>	42.54	32.853	44.0801	56.5126	42.5802	54.0244	52.7654	44.1525	37.2171	48.2977	41.4362	41.4807	26.3385	43.2485	33.273	41.7582	39.3094	44.8409	33.6284	64.8764	44.7036	0.0878429	0.339289
1703	ENSG00000023445.9	<BIRC3>	23.4049	29.0085	24.0046	17.1041	34.7072	27.3875	22.8619	24.2911	21.7608	13.7302	9.3771	17.5963	8.17339	15.3996	10.8593	20.6121	14.8026	14.9768	9.52277	22.7894	33.9071	0.645181	0.800432
1704	ENSG00000089685.10	<BIRC5>	1.10699	0.846157	0.411614	0.673798	0.621076	1.27424	0.813196	0.846316	0.68407	0.449603	0.495394	2.76538	0.306052	2.41069	0.48848	10.2393	1.28883	0.806169	0.316254	0.687211	0.965818	-0.0649917	-0.383921
1705	ENSG00000115760.9	<BIRC6>	63.0984	47.1456	53.6033	53.2991	53.1568	69.612	49.1614	60.0344	52.1002	57.2898	44.9924	61.8248	57.4658	66.5459	38.8342	59.4339	46.0379	56.0556	60.0356	37.7595	56.3969	-0.0766938	0.222713
1706	ENSG00000101197.8	<BIRC7>	17.4131	12.8211	12.2362	22.3735	4.4754	6.23157	41.1403	21.7521	34.9245	56.771	25.5128	13.2809	0	19.7173	61.06	8.94274	21.5121	28.3592	34.9812	21.545	18.2816	-0.132352	-0.000115265
1707	ENSG00000163098.3	<BIRC8>	0	0	0	0	0	0	0	0	0	0	0	0	0	0	0	0	0	0	0	0	0	0	1
1708	ENSG00000134897.9	<BIVM>	18.0105	16.6288	15.211	20.5595	12.4581	29.8312	12.161	14.5854	23.887	16.2895	16.0826	23.9725	15.6267	25.906	7.08296	15.9024	12.3197	19.6347	18.4306	15.2301	13.9526	0.0481529	0.161556
1709	ENSG00000204960.5	<BLACE>	0	0	0	0	0	0	0	0	0	0	0	0	0	0	0	0	0	0	0	0	0	0	1
1710	ENSG00000166619.8	<BLCAP>	4.9551	5.51841	4.35936	4.00823	3.05058	9.32117	7.57751	5.67211	6.48942	5.42982	5.59087	8.94786	15.5907	30.4035	3.43815	5.79657	6.40626	6.01939	8.99568	0.427185	7.968	-0.209179	-0.414757
1711	ENSG00000259571.1	<BLID>	0	0	0	0	0	0	0	0	0	0	0	0	0	0	0	0	0	0	0	0	0	0	1
1712	ENSG00000136573.8	<BLK>	0.122999	0	0.318065	0.138215	0.127869	0	0.0554452	0.16206	0.277326	0.259386	0.0707705	0.528417	0.46808	0.071961	0.0375754	0.552962	0.0379069	0.447872	0	0.241453	0.275948	-0.228054	-0.412855
1713	ENSG00000197299.6	<BLM>	1.49356	2.18897	5.05162	1.98684	1.82669	3.97983	1.18283	2.48493	1.55302	0.933791	1.38003	1.35627	2.26839	3.97584	0.789083	4.44277	2.50185	0.59119	1.54613	3.10174	1.53496	0.234197	0.0740934
1714	ENSG00000108578.10	<BLMH>	19.1878	8.88465	5.61291	23.0992	8.34799	22.2905	8.59401	11.0921	11.4258	17.3616	13.3756	11.5723	10.9099	28.8564	4.92237	8.73299	8.71858	14.726	21.1363	10.6053	10.3998	0.0434815	0.0548881
1715	ENSG00000095585.12	<BLNK>	1.42327	4.23078	2.15162	4.30194	3.54379	0	0.499007	3.99749	2.31105	1.10671	5.34318	7.75011	1.65628	2.15883	3.40057	0.648301	4.09394	11.4476	2.21378	3.13888	0.482909	-0.413891	-0.408283
1716	ENSG00000135441.3	<BLOC1S1>	339.512	526.089	363.511	330.04	400.028	261.656	540.683	288.089	562.176	563.733	496.013	417.678	246.228	306.896	675.38	381.544	384.736	462.669	291.903	597.446	467.611	-0.129529	-0.0698245
1717	ENSG00000196072.7	<BLOC1S2>	79.264	84.4685	123.241	62.9223	80.9956	85.7233	98.3228	59.098	65.3194	60.6618	61.4465	63.1106	50.6606	66.0062	87.5694	85.2706	75.8327	79.1658	66.2377	79.7165	52.3611	0.272811	0.434109
1718	ENSG00000189114.6	<BLOC1S3>	0	0.386289	0.486453	0.483752	0.47494	0	1.46006	0.486181	2.45895	0.449603	0.300775	0	0.23404	0.629659	0.789083	0	2.59662	1.52276	0.579799	0.334319	0.58639	-0.140872	-0.0176983
1719	ENSG00000186222.3	<BLOC1S4>	0	0	0	0	0	0	0	0	0	0	0	0	0	0	0	0	0	0	0	0	0	0	1
1720	ENSG00000188428.12	<BLOC1S5>	15.041	9.67562	14.5374	17.8297	20.0754	15.4131	12.2349	10.732	13.6999	14.0242	12.5264	16.927	16.3288	13.0429	14.8235	16.9893	19.7684	15.8547	11.3324	12.8341	10.7965	-0.0520203	-0.0790685
1721	ENSG00000259040.3	<BLOC1S5-TXNDC5>	0	0	0	0	0	0	0	0	0	0	0	0	0	0	0	0	0	0	0	0	0	0	1
1722	ENSG00000104164.6	<BLOC1S6>	11.966	11.3311	12.18	13.8906	11.3255	9.94956	9.8138	8.55319	8.67105	8.71538	10.244	21.2424	21.2976	5.10923	9.88232	10.2965	9.98846	13.6511	13.1948	0.780077	24.4214	0.0448607	-0.284163
1723	ENSG00000106605.6	<BLVRA>	6.14994	8.42478	9.61679	6.2715	8.71333	24.2804	20.1451	11.4343	16.0294	15.5632	7.13013	12.5763	7.48927	8.04164	10.8969	25.4744	10.8414	8.02586	12.615	3.69608	12.9523	-0.0407458	0.213699
1724	ENSG00000090013.5	<BLVRB>	3.84811	8.71909	11.02	10.3143	3.94566	14.9243	7.06002	6.7165	7.04407	7.10718	6.52858	2.25458	7.11121	12.1614	4.50905	7.79868	10.7466	3.43965	7.92392	8.09795	6.57101	-0.00524231	0.238187
1725	ENSG00000117475.9	<BLZF1>	27.253	17.5669	21.7594	25.2761	26.0852	40.5139	16.227	20.0235	26.7527	23.3275	20.0458	24.131	15.6627	25.87	15.8004	29.86	23.199	24.615	20.5917	24.7025	22.5932	0.0656168	0.251624
1726	ENSG00000104081.9	<BMF>	8.69778	6.45654	31.6943	16.4994	4.67634	14.4356	6.30227	5.11391	5.91628	9.73563	11.5533	17.2616	4.39275	4.92933	8.21022	5.33895	9.62834	22.3936	4.51541	1.13297	6.9332	0.119866	0.211568
1727	ENSG00000168283.9	<BMI1>	38.3229	20.8228	14.0323	53.8693	30.725	14.4705	8.7049	15.5578	21.7608	30.6249	13.2872	30.2959	11.2339	20.9766	10.2957	11.9364	21.4553	26.8006	15.5316	3.10174	14.4183	0.546704	0.543123
1728	ENSG00000168487.13	<BMP1>	128.165	134.245	94.746	130.06	289.568	127.442	95.4397	188.998	201.838	96.9932	133.119	80.2489	94.282	136.222	91.7215	127.067	118.554	80.2048	212.945	67.6439	93.5464	0.451519	0.493519
1729	ENSG00000163217.1	<BMP10>	0	0	0	0	0	0	0	0	0	0	0	0	0	0	0	0	0	0	0	0	0	0	1
1730	ENSG00000130385.5	<BMP15>	0	0	0	0	0	0	0	0	0	0	0	0	0	0	0	0	0	0	0	0	0	0	1
1731	ENSG00000125845.6	<BMP2>	0	0	0	0	0	0	0	0	0	0	0	0	0	0	0	0	0	0	0	0	0	0	1
1732	ENSG00000138756.13	<BMP2K>	69.4944	57.9801	52.3311	52.9018	51.4032	62.2633	80.0999	42.5319	69.7196	50.4593	48.4601	64.0265	19.2453	54.5104	49.7122	36.2095	38.1153	61.9317	49.5816	34.862	54.1721	0.159623	0.715621
1733	ENSG00000152785.6	<BMP3>	0	0	0	0	0	0	0	0	0	0	0	0	0	0	0	0	0	0	0	0	0	0	1
1734	ENSG00000125378.11	<BMP4>	10.1562	8.24083	8.0826	7.80914	11.6726	9.70519	7.79929	13.9012	13.9217	4.27123	19.6919	13.8445	16.4548	13.7266	15.9132	16.0168	15.3712	11.161	13.4057	10.5868	28.9401	-0.744519	-1.08994
1735	ENSG00000112175.6	<BMP5>	0	0	0	0	0	0.331652	0.166336	0	0	0.276679	0	0.422734	0	0	0	0.552962	0.360115	0	0	0	0.845091	0	-0.365579
1736	ENSG00000153162.8	<BMP6>	0	0	0	0	0	0	0	0	0	0	0	0	0	0	0	0	0	0	0	0	0	0	1
1737	ENSG00000101144.8	<BMP7>	4.69153	2.48329	2.09549	5.99507	2.86791	2.40884	5.17489	1.56658	7.17349	3.26827	4.91855	9.86378	0.270046	2.91442	1.23999	1.62075	2.36918	4.65786	2.1435	0.0928664	1.8454	0.432702	0.260053
1738	ENSG00000183682.7	<BMP8A>	0	0	0	0	0	0	0	0	0	0	0	0	0	0	0	0	0	0	0	0	0	0	1
1739	ENSG00000116985.6	<BMP8B>	0.685279	1.0301	0.261936	1.01933	0.602809	0	0.73927	0.324121	1.22023	1.24505	0.442316	0.528417	0.162028	0.413776	0.97696	0.305083	0.151627	0.985317	1.388	0.0742931	0.965818	0.363434	0.218992
1740	ENSG00000164619.4	<BMPER>	2.74112	3.27426	18.3542	2.33238	4.585	9.16407	3.49305	5.79816	3.51279	2.57657	8.404	8.56035	11.4319	5.10923	3.73875	14.2435	8.56695	10.7489	3.02198	2.26594	7.77829	-1.1534	-0.328904
1741	ENSG00000107779.7	<BMPR1A>	0	8.46157	1.88968	3.24805	6.21076	0	3.16038	1.92672	12.2208	0.0172924	7.11244	2.34265	7.32725	2.80648	2.23574	1.56355	5.04161	13.9378	9.92687	0	5.24301	-0.864551	-0.261562
1742	ENSG00000138696.6	<BMPR1B>	17.9578	24.98	24.0233	19.9202	13.7002	26.8638	16.8923	33.1864	30.3209	21.6328	20.2581	24.4305	5.59895	22.8656	16.5707	24.6354	20.9435	38.8573	12.3163	20.3377	26.1633	0.121523	0.170034
1743	ENSG00000204217.8	<BMPR2>	22.1749	17.4198	20.2626	23.2028	20.4224	24.7866	12.2534	17.2324	21.5759	17.742	21.4612	23.2503	25.5824	18.9437	15.0677	26.1227	22.2892	20.0826	28.0061	9.58381	22.6622	-0.128822	-0.231198
1744	ENSG00000165733.7	<BMS1>	0	0	0	0	0	0	0	0	0	0	0	0	0	0	0	0	0	0	0	0	0	0	1
1745	ENSG00000102010.10	<BMX>	2.79383	5.38965	7.78324	4.90663	8.622	0	7.22636	8.55319	8.13488	3.76975	7.2009	10.1104	33.5577	11.3339	3.77633	11.7838	20.9056	8.47373	8.71456	4.60617	5.5707	-0.436683	-0.626922
1746	ENSG00000169594.8	<BNC1>	0	0	0	0	0	0	0	0	0	0	0	0.105683	0	0	0	0	0.0189534	0	0.140557	0	0.0517403	0	-0.547164
1747	ENSG00000173068.13	<BNC2>	16.0601	30.7008	33.8833	12.9576	21.5002	17.9441	33.951	48.384	47.7924	33.651	42.8162	43.6825	19.3173	24.1249	26.5282	34.093	29.302	60.0685	17.1129	18.7404	41.4095	0.132818	-0.152469
1748	ENSG00000113734.13	<BNIP1>	18.2917	20.9884	19.4394	19.5401	25.592	21.505	19.2395	18.691	24.4601	19.0562	20.5235	20.3088	12.4761	21.8402	26.9415	22.7859	21.6448	25.6362	23.6839	19.6691	20.3512	-0.147707	-0.168199
1749	ENSG00000140299.7	<BNIP2>	72.0071	79.41	95.2137	55.6661	82.7858	82.3894	76.4035	71.1985	91.8317	56.0274	60.2434	83.3137	135.743	101.069	58.7679	109.429	90.4837	74.7229	90.4487	70.4484	90.7352	-0.214075	-0.439733
1750	ENSG00000176171.7	<BNIP3>	13.2312	13.9248	18.0736	35.4348	20.8974	27.0558	5.98808	23.8229	19.4313	15.8053	13.181	13.2633	14.9425	26.2478	8.43567	12.7563	15.7693	12.2896	29.8509	11.4783	7.46784	0.492866	0.402266
1751	ENSG00000104765.10	<BNIP3L>	3.83054	28.9349	26.0065	41.1189	33.0266	7.92474	4.10295	19.1051	15.4748	25.4717	12.261	46.624	26.7165	2.66256	11.1411	67.1182	28.1648	13.3824	34.4717	15.3601	0.448416	0.5229	-0.126128
1752	ENSG00000163141.14	<BNIPL>	1.01913	0.882946	0.130968	4.57837	3.41592	0.139643	0.683824	1.94473	0.998372	2.45552	1.59234	1.56764	0	0.413776	0.319391	0.800842	1.36465	1.73774	0.245975	1.33728	0.983065	0.0247746	0.429261
1753	ENSG00000144857.10	<BOC>	40.0098	19.9031	40.7311	25.7771	29.7203	26.4973	26.4658	46.9975	31.2638	33.9277	70.7175	61.0322	60.1662	20.8867	27.9561	27.2858	26.2315	53.44	76.8498	17.2731	87.6135	-0.799457	-0.607464
1754	ENSG00000145919.6	<BOD1>	116.972	100.932	102.735	136.09	113.054	108.485	115.141	96.498	105.069	128.552	114.578	111.249	78.5654	127.065	141.49	95.2239	130.4	119.492	120.528	114.671	129.92	-0.10888	-0.200139
1755	ENSG00000038219.8	<BOD1L1>	62.0441	44.6256	46.6246	44.2979	42.1236	58.8421	35.2816	59.7823	40.7114	60.731	41.6485	50.3053	61.4805	61.7605	22.564	43.8747	39.2336	60.3552	46.8408	29.2343	62.6057	-0.0375312	0.133188
1756	ENSG00000228075.4	<BOD1L2>	0	0	0	0	0	0	0	0	0	0	0	0	0	0	0	0	0	0	0	0	0	0	1
1757	ENSG00000176720.3	<BOK>	0	0	0	0	0	0	0	0	0	0	0	0	0	0	0	0	0	0	0	0	0	0	1
1758	ENSG00000178096.8	<BOLA1>	39.5178	44.4784	49.6556	45.801	31.8941	35.4344	35.7067	50.2567	51.1388	54.0388	48.2478	48.3149	39.2467	34.4693	48.3407	46.8874	44.8817	46.4532	32.7323	55.4598	35.0109	-0.0409356	0.0144633
1759	ENSG00000183336.7	<BOLA2>	0	0	0	0	0	0	0	0	0	0	0	0	0	0	0	0	0	0	0	0	0	0	1
1760	ENSG00000169627.7	<BOLA2B>	36.9524	98.3381	54.5762	29.7162	81.8176	14.4705	69.5098	52.3455	94.4016	53.6411	38.3576	32.3215	42.9553	22.11	101.322	42.845	58.2818	24.4538	45.5757	58.2086	28.5089	0.333263	0.383184
1761	ENSG00000163170.7	<BOLA3>	18.7661	32.8162	9.97228	18.0716	22.8337	10.5081	24.0447	21.338	34.9615	19.5577	22.8235	18.8821	17.1569	17.5405	35.8845	36.076	23.6728	17.8074	18.3076	30.9431	16.3844	0.112077	-0.174426
1762	ENSG00000152430.13	<BOLL>	0	0.31271	0.0374194	0	0	0	0.0369635	0	0.0369767	0.103755	0.106156	0	0.396067	0.0359805	0	0	0	0.197063	0	0	0	0.0523651	-0.0815353
1763	ENSG00000170727.7	<BOP1>	16.9914	13.097	6.64195	35.383	13.7915	15.9018	15.8573	16.9083	12.0544	18.2262	14.6495	23.7259	7.6333	17.8283	8.47325	5.18641	13.9497	10.516	20.8728	3.99325	18.6437	0.180857	0.328654
1764	ENSG00000136122.11	<BORA>	3.23311	4.94818	6.88518	4.64748	7.08757	9.44336	5.02703	4.53769	6.28605	4.53061	4.29931	4.19211	4.53677	8.16757	3.6636	6.99783	4.90894	6.23437	5.86827	6.25919	4.77735	0.0208314	0.096652
1765	ENSG00000172331.7	<BPGM>	3.37368	9.0502	5.35098	1.76224	2.52084	9.04188	8.20589	3.34925	1.16477	1.76383	3.37929	3.2938	1.60227	1.43922	7.90962	3.87074	3.92336	4.37123	2.51246	0.984383	6.69174	-0.00664514	0.243767
1766	ENSG00000137274.8	<BPHL>	36.8645	28.9349	31.7317	19.3846	32.5152	26.9511	36.7971	27.4242	32.7059	33.1841	36.8891	51.3621	45.1877	28.3706	27.5428	33.826	26.3642	37.6929	21.558	41.0098	37.6152	-0.196712	-0.445071
1767	ENSG00000101425.8	<BPI>	2.42483	3.18228	4.11614	1.96956	0	0.0174554	2.45807	7.07664	1.16477	5.58545	6.06857	6.25293	1.85432	0	3.40057	1.02965	0.303255	10.4444	4.77895	4.69904	5.96738	-0.821716	-0.326625
1768	ENSG00000198183.7	<BPIFA1>	0	0	0	0	0	0	0	0	0	0	0	0	0.108018	0	0	0	0.322208	0	0	0	0.137974	0	-0.489162
1769	ENSG00000131050.6	<BPIFA2>	0	0	0	0	0	0	0	0	0.11093	0	0	0	0.108018	0	0	0	0.113721	0	0	0	0	0	-0.139166
1770	ENSG00000131059.7	<BPIFA3>	0	0	0	0	0	0	0	0.10804	0	0	0	0	0.792135	0	0	0	0	0	0	0	0	0	-0.248518
1771	ENSG00000125999.6	<BPIFB1>	0	0	0	0	0	0	0	0	0.184884	0	0	0	0.126021	0	0	0	0	0	0	0	0	0	0.11356
1772	ENSG00000078898.6	<BPIFB2>	0	0	0	0	0	0	0	0	0	0	0	0	0	0	0	0	0	0	0	0	0	0	1
1773	ENSG00000186190.7	<BPIFB3>	0	0	0	0	0	0	0	0	0	0	0	0	0	0	0	0	0	0	0	0	0	0	1
1774	ENSG00000186191.7	<BPIFB4>	0.333854	0	0	0	0	0	0	0	0	0.466895	0.176926	0	0	0.197893	0	0	0	0.931573	0.860914	0	0	0	-0.294034
1775	ENSG00000167104.7	<BPIFB6>	0	0	0	0	0	0	0	0	0	0	0	0	0	0	0	0	0	0	0	0	0	0	1
1776	ENSG00000184459.4	<BPIFC>	0.0878563	0	0.280646	0	0	0	0	0	0.406744	0.0864621	0.0884632	0	0	0.143922	0	0	0	0.125404	0	0.0928664	0.465662	0	0.019271
1777	ENSG00000162813.13	<BPNT1>	7.66107	8.77428	8.32582	12.0765	6.32036	31.9084	8.68642	3.52932	7.6357	6.12152	5.96242	13.2633	8.94752	6.78232	11.8362	17.5613	6.78533	13.8124	9.71603	5.64628	4.31169	-0.153586	0.0660362
1778	ENSG00000171634.12	<BPTF>	125.107	85.3147	86.8879	111.177	91.0972	148.161	72.3006	93.3288	98.8018	90.8025	87.667	127.313	95.8303	99.3961	69.1387	90.8574	81.9357	103.673	92.3814	75.9647	105.205	-0.00261737	0.246495
1779	ENSG00000183753.5	<BPY2>	0	0	0	0	0	0	0	0	0	0	0	0	0	0	0	0	0	0	0	0	0	0	1
1780	ENSG00000183795.4	<BPY2B>	0	0	0	0	0	0	0	0	0	0	0	0	0	0	0	0	0	0	0	0	0	0	1
1781	ENSG00000185894.4	<BPY2C>	0	0	0	0	0	0	0	0	0	0	0	0	0	0	0	0	0	0	0	0	0	0	1
1782	ENSG00000157764.8	<BRAF>	34.018	25.2559	25.1833	30.079	34.7437	49.3114	27.4639	28.7747	26.0131	32.5097	29.8475	34.9636	29.219	37.4557	25.0064	29.8981	25.9283	34.3249	35.7016	25.4454	34.1831	-0.0225396	0.0291872
1783	ENSG00000089234.11	<BRAP>	12.8622	17.0887	18.3168	11.6792	16.8056	22.1334	14.8963	16.116	18.4699	15.079	11.7302	15.7116	16.5088	16.1372	12.2684	18.1715	17.3234	16.2129	16.252	17.7003	14.1078	0.0212376	0.191029
1784	ENSG00000106009.11	<BRAT1>	24.0024	22.0737	14.2194	23.9457	15.3625	19.0264	16.4303	20.4376	19.3943	21.7712	25.902	25.8748	25.7084	30.0977	21.0986	10.2584	17.6077	20.4409	29.3765	8.97089	34.666	-0.360331	-0.349209
1785	ENSG00000012048.15	<BRCA1>	8.08278	5.24249	3.70452	8.43111	5.18781	5.27152	4.01054	6.68049	7.6357	8.47328	7.89092	11.1496	3.22255	5.27114	2.96846	4.84319	3.90441	6.30603	3.91804	4.42044	5.36374	0.277404	0.295992
1786	ENSG00000139618.10	<BRCA2>	0.597423	1.12208	1.16	0.207322	1.55269	0	0.258744	0.702262	0.573139	1.19318	0.849246	1.3915	0	0.269854	0.413329	2.68854	1.61104	0.66285	1.21231	0	1.70743	-0.230718	-0.250921
1787	ENSG00000185515.10	<BRCC3>	18.2741	17.0335	19.8136	15.4973	18.8332	28.1904	17.1511	18.1328	19.8565	19.3848	17.3034	22.035	18.5612	22.038	14.1659	18.7435	18.0816	21.9457	15.76	15.583	23.4901	-0.000567244	0.0723071
1788	ENSG00000100425.14	<BRD1>	56.1402	54.246	54.5201	46.2156	38.3788	48.875	57.6445	57.1893	48.0698	41.6228	47.8586	61.2083	57.9879	68.1111	43.8129	40.29	49.6769	57.6321	56.8555	43.9258	74.23	-0.139741	-0.347988
1789	ENSG00000204256.8	<BRD2>	387.692	396.553	322.761	438.228	365.43	406.815	326.314	357.559	363.962	382.526	334.833	361.684	410.704	371.75	338.686	350.483	367.204	387.301	396.846	224.997	403.022	0.0263368	0.256004
1790	ENSG00000169925.12	<BRD3>	0.737993	2.55686	3.31162	0.829289	2.77657	5.2017	0.31419	1.74665	1.14628	2.31718	1.02617	3.13527	0.46808	0.899512	0.770295	1.20126	2.50185	1.8094	8.20504	0	4.67387	0.573624	-0.0533079
1791	ENSG00000141867.13	<BRD4>	49.5685	40.45	36.8207	61.7302	51.6224	35.6962	20.0896	41.2534	44.2981	43.8882	37.6145	40.3182	39.3547	48.5197	31.15	33.6735	36.4095	36.188	67.5554	9.30521	40.5816	0.176368	0.243867
1792	ENSG00000166164.11	<BRD7>	81.109	56.3982	89.0208	86.1424	87.3708	65.3006	69.8425	64.2299	91.7023	80.7383	77.3876	65.647	81.7339	96.3018	95.8736	80.6562	95.9422	74.3646	74.2495	70.7456	74.0576	0.0640542	-0.210563
1793	ENSG00000112983.13	<BRD8>	135.738	114.25	124.382	130.976	168.439	232.802	86.6794	130.117	96.1765	119.473	117.851	118.771	79.6276	159.322	81.7828	96.0057	114.156	114.888	150.238	85.5113	128.385	0.146823	0.420088
1794	ENSG00000028310.13	<BRD9>	82.3917	74.0019	73.7911	62.6632	66.8935	89.2493	80.5434	75.9343	77.3553	73.3026	64.3658	90.8877	84.5424	96.4097	62.0182	44.9044	65.6926	71.9282	85.2129	36.2922	111.173	0.0593164	0.0706691
1795	ENSG00000137948.14	<BRDT>	0	0	0.0561291	0.0691075	0	0	0	0.0720269	0	0.311264	0	0	0.558095	0	0	0	0.0758137	0.0716594	0	0	0	0	-0.0635117
1796	ENSG00000158019.16	<BRE>	56.1051	71.3347	84.0628	56.2362	69.8528	40.1125	61.5812	65.7785	78.0764	66.8525	63.9766	66.0169	78.2593	67.4094	56.9267	87.9782	73.3119	68.7572	61.529	67.9968	57.2765	-0.0234292	-0.203063
1797	ENSG00000185024.11	<BRF1>	54.3479	63.0755	42.0407	56.0116	41.0275	67.5523	60.7125	60.3945	55.0953	65.0195	57.5364	58.5134	61.9305	72.0509	43.8693	43.3599	50.4161	69.4738	80.8908	38.1681	66.8139	-0.00760621	-0.119188
1798	ENSG00000104221.8	<BRF2>	1.4057	0	0	0.310984	0	1.46625	1.55247	0	1.03535	0	0	0.95115	0	0	1.0709	2.17371	0.227441	0.483701	0.685217	0.204306	0.672623	-0.585643	-0.0105037
1799	ENSG00000164713.5	<BRI3>	138.022	98.2461	208.538	161.608	143.797	44.2319	132.662	142.289	128.513	125.906	179.598	106.864	257.21	137.733	211.324	140.586	159.891	132.498	111.884	127.041	131.558	-0.0251745	-0.351895
1800	ENSG00000184992.10	<BRI3BP>	0	0	0	0	0	0	0	0	0	0	0	0	0	0	0	0	0	0	0	0	0	0	1
1801	ENSG00000182685.3	<BRICD5>	14.4787	38.6473	12.9471	11.4027	31.3826	2.79286	33.0269	25.7676	26.1426	19.4886	19.745	15.5707	15.0326	25.9599	16.8338	9.5529	17.1529	21.9636	27.4263	14.7472	20.5409	0.389744	0.242826
1802	ENSG00000078725.8	<BRINP1>	0	0	0.0561291	0.0345537	0.164402	0	0	0	0	0	0	0.0352278	0	0	0	0	0	0	0.333824	0	0	0	-0.061712
1803	ENSG00000198797.6	<BRINP2>	2.30184	0	1.75871	0.656521	0	0.45384	0.11089	0.180067	0.647093	0	0.212312	0.176139	0.126021	0	0.131514	0.305083	2.61557	0.644935	0.720357	0	0	0.272934	0.148126
1804	ENSG00000162670.8	<BRINP3>	0	0.0367894	0.63613	0	0	1.30915	0.0369635	0.0540201	0.129419	0.0864621	0	0.31705	0.216037	0.251863	0.676357	0	0.132674	0.125404	0.158127	0.0185733	0	-0.213905	0.122241
1805	ENSG00000136492.4	<BRIP1>	0.0351425	0.0367894	0.523872	0.172769	0.109602	0.663304	0	0	0.369767	0.0864621	0.247697	0	0.0540092	0.0359805	0	0.24788	0.208488	0.268723	0.0175697	0	0.0517403	0.116233	0.371339
1806	ENSG00000113460.8	<BRIX1>	12.0363	11.4415	17.6807	20.8705	26.5236	30.128	21.9009	14.2613	14.9201	17.448	9.1294	7.64443	8.74949	24.5027	13.6023	22.252	22.9336	14.8335	18.2373	14.06	8.10597	0.311139	0.433244
1807	ENSG00000254999.2	<BRK1>	299.467	309.859	295.614	270.832	363.823	216.9	262.977	295.976	390.437	315.241	300.562	309.441	275.843	255.839	394.673	403.243	333.884	306.093	249.823	276.816	233.314	-0.0136775	-0.0199769
1808	ENSG00000174744.9	<BRMS1>	13.0906	18.1924	11.1697	10.919	10.8688	7.48836	14.1016	9.20143	16.621	10.3063	8.10323	10.674	9.01954	18.3321	18.2616	14.5868	9.66625	13.7407	19.028	11.4226	19.9372	-0.302834	-0.306758
1809	ENSG00000100916.9	<BRMS1L>	1.42327	4.26757	8.96195	3.058	5.04168	0.820403	2.84619	2.9531	6.36	1.38339	5.87395	4.59723	6.57112	7.89772	2.76179	3.54659	4.47301	2.27519	3.95318	1.17012	6.0881	-0.504477	-0.235509
1810	ENSG00000162819.7	<BROX>	7.45022	5.72075	9.01808	4.54381	4.91381	14.5229	2.47655	4.53769	5.74988	3.76975	6.40473	6.341	6.60712	7.12414	2.51755	6.63555	8.14997	5.94773	3.56664	2.73027	6.9332	-0.247241	0.139769
1811	ENSG00000156983.11	<BRPF1>	22.7196	29.3028	24.2104	24.4295	24.569	24.0186	24.5068	23.6428	29.5444	18.1916	20.1165	23.127	26.1945	28.9283	22.6016	21.985	26.3263	26.1199	29.1481	12.4069	21.1618	0.0710596	0.182797
1812	ENSG00000096070.15	<BRPF3>	56.2281	41.3145	49.1878	52.8845	42.562	50.0969	39.6618	49.9146	35.2388	42.7123	41.9139	48.6848	28.0128	67.8772	46.9692	38.04	46.8718	52.0785	64.1645	47.009	49.8259	-0.0325191	-0.181361
1813	ENSG00000102239.4	<BRS3>	0	0	0	0	0	0	0	0	0	0	0	0	0	0	0	0	0	0	0	0	0	0	1
1814	ENSG00000160469.12	<BRSK1>	32.5947	19.6456	32.9665	32.1522	26.7611	27.789	16.0237	14.9996	12.2763	19.8171	23.0004	42.5199	13.3043	35.8186	21.9064	9.68637	19.7495	32.0855	30.6239	9.1009	36.9943	0.0176132	-0.106177
1815	ENSG00000174672.11	<BRSK2>	45.2987	56.7845	11.9368	36.2123	22.925	20.161	27.279	37.67	42.172	43.2138	27.3882	31.705	10.5498	28.6764	23.0525	14.6821	19.9201	35.0236	38.8466	28.2128	33.8554	0.382932	0.48454
1816	ENSG00000185658.9	<BRWD1>	40.3261	38.0219	33.6962	33.5171	31.9306	43.9177	42.3417	36.8597	40.0273	37.0058	28.0428	35.5272	30.6412	45.8571	19.2574	38.3641	30.9509	36.6001	32.5742	22.065	26.9394	0.273421	0.73208
1817	ENSG00000165288.10	<BRWD3>	3.88325	0	4.41549	1.69313	1.09602	0	0.147854	1.17044	6.43395	0	2.10542	6.04157	3.97868	0	0	0.343218	0.587556	1.48693	2.07322	0.0742931	5.50171	-0.282819	-0.0418279
1818	ENSG00000168000.10	<BSCL2>	67.0695	83.4936	82.7718	98.2708	89.8003	85.7408	95.9572	98.5327	145.448	111.917	111.941	117.009	58.4379	92.6498	127.738	76.1563	88.2851	97.3494	49.1775	164.411	68.7283	0.00354201	0.00695885
1819	ENSG00000160058.14	<BSDC1>	90.1582	89.2143	99.4421	91.8093	77.5432	93.491	80.3216	84.8836	86.2852	85.6148	81.4569	91.1871	79.4115	96.0679	91.7591	83.2685	93.9142	96.5253	80.2583	62.4619	92.6668	-0.0551268	0.133592
1820	ENSG00000172270.14	<BSG>	538.7	803.352	762.253	538.174	685.613	481.402	751.911	555.543	775.569	557.006	668.375	629.274	577.268	607.441	876.634	653.43	714.753	655.756	562.212	776.121	522.922	-0.0726631	-0.0858121
1821	ENSG00000164061.4	<BSN>	0.579852	0.367894	0	0	0	0	0.184817	0.16206	0	0	0.212312	0	0	0	0	0	0	0.340382	0	0.594345	0	0	0.0922873
1822	ENSG00000162399.6	<BSND>	0	0	0	0	0	0	0	0	0	0	0	0	0	0	0	0	0	0	0	0	0	0	1
1823	ENSG00000188334.3	<BSPH1>	0	0	0	0	0	0	0	0	0	0	0	0	0	0	0	0	0	0	0	0	0	0	1
1824	ENSG00000119411.10	<BSPRY>	0	0.257526	0	1.00206	0.200936	0.541117	0.240263	0.144054	0	0.328556	0	0.775011	0.288049	0	0.394541	0.24788	0.265348	0.250808	0	0.222879	0	-0.0536086	0.129838
1825	ENSG00000109743.6	<BST1>	13.9164	7.21073	13.1155	7.74003	12.8051	21.313	11.9207	15.1977	10.0762	7.41845	22.5227	21.7884	12.2601	11.9455	13.1514	18.5528	14.8026	22.8056	8.1699	10.7539	17.9021	-0.250561	-0.56839
1826	ENSG00000130303.8	<BST2>	1.7747	8.40638	9.35486	3.74908	0	7.27889	7.07851	2.23283	5.50953	6.36361	5.21933	0	9.70365	9.55282	7.57144	3.64192	1.83848	2.43642	1.65155	2.6374	0	1.03672	0.245537
1827	ENSG00000188909.4	<BSX>	0	0	0	0	0	0	0	0	0	0	0	0	0	0	0	0	0	0	0	0	0	0	1
1828	ENSG00000095564.9	<BTAF1>	102.915	48.5252	37.0452	37.7845	53.7779	98.2738	12.4382	57.9096	41.377	51.1164	54.2279	66.968	48.6623	57.9286	17.9047	19.43	26.1557	44.2139	55.3445	1.22584	90.7179	0.0336034	0.271464
1829	ENSG00000064726.5	<BTBD1>	4.42796	1.61873	3.2742	3.14439	5.99156	7.57563	3.10493	4.05151	5.73139	2.31718	2.30004	5.60122	5.50894	4.17374	3.71996	4.49997	3.90441	2.74097	4.37485	2.39595	2.96644	-0.0813739	0.133695
1830	ENSG00000148925.6	<BTBD10>	9.94534	9.63883	7.76453	7.6191	6.21076	10.1939	2.64289	7.07664	7.28442	5.2569	6.7232	14.6195	6.66113	7.07017	3.62602	6.97877	3.52534	7.93628	8.48615	8.19081	6.53652	0.0884734	0.015937
1831	ENSG00000151136.10	<BTBD11>	0.983991	1.0301	1.25355	1.24393	0.621076	2.25174	2.3287	0.882329	0.924418	1.1413	1.89311	1.1449	0.198034	0.611668	1.05211	1.3538	1.00453	2.14978	1.5637	0.891517	1.01756	0.03089	0.120697
1832	ENSG00000138152.7	<BTBD16>	1.38813	3.03513	0.804518	0.293707	0.767211	4.81768	2.82771	0.828309	0.647093	0.466895	1.07925	4.26256	0	0.539707	2.51755	1.33474	1.42151	1.36153	0.52709	0.520052	1.39699	-0.47896	0.120807
1833	ENSG00000204347.3	<BTBD17>	0	0	0	0	0	0	0	0	0	0	0	0	0	0	0	0	0	0	0	0	0	0	1
1834	ENSG00000233436.3	<BTBD18>	0.0351425	0.0919736	0.205807	0.103661	0	0	0.277226	0.234087	0.11093	0.172924	0.0707705	0.933537	0.126021	0.215883	0	0.114406	0.0189534	0.125404	0.140557	0.0928664	0.327688	-0.0423894	-0.260906
1835	ENSG00000222009.4	<BTBD19>	28.4303	43.246	32.7607	16.5512	29.7751	22.692	29.386	40.5511	40.3046	27.2874	30.8029	37.2358	26.7165	39.1288	21.1737	27.2286	34.1162	33.2858	40.1643	22.6408	30.5268	-0.0574649	-0.00800535
1836	ENSG00000133243.4	<BTBD2>	64.3811	86.9702	36.933	53.3682	56.4448	57.4107	54.0406	56.253	63.2117	91.131	64.755	54.4093	27.9228	63.6855	29.8349	30.8896	36.2958	58.5278	57.3826	60.2331	70.8152	-0.01138	0.511699
1837	ENSG00000132640.10	<BTBD3>	38.1296	32.0068	29.8046	38.7866	31.4739	37.6862	21.6421	38.4263	39.787	51.9118	24.062	30.1726	11.2519	38.1213	22.3761	19.6206	18.9534	27.3381	39.1101	2.32166	37.5634	0.644976	0.808057
1838	ENSG00000184887.9	<BTBD6>	15.6736	37.4332	15.342	15.29	10.5583	11.538	25.2645	25.1194	17.1572	18.5893	24.2212	26.1919	19.1553	13.2408	12.3623	15.216	13.836	32.6588	20.0646	8.17224	22.3173	-0.216579	0.0315008
1839	ENSG00000011114.10	<BTBD7>	16.4818	14.2559	18.7471	19.1773	20.1667	23.9488	13.9722	15.0896	17.7858	14.8888	24.6281	21.4185	17.3189	32.0046	12.9823	17.0656	15.1627	20.4229	23.9123	10.0481	16.2809	-0.0150663	-0.253564
1840	ENSG00000189195.5	<BTBD8>	0.614994	0.643815	0	0.345537	0.584542	0	0	0	1.51605	0.743574	0.389238	0.72217	0.252043	0.179902	0	0.228812	0.796044	0.322467	0.878484	0.445759	0	0.23063	0.109301
1841	ENSG00000183826.12	<BTBD9>	8.73292	5.99668	8.0826	7.34267	9.71801	11.0318	6.15442	7.67086	6.10116	8.47328	6.44012	15.0775	7.54328	8.05963	5.52358	8.33257	7.24021	8.49164	5.86827	1.69017	10.0894	0.0586023	0.0716176
1842	ENSG00000174808.7	<BTC>	0	0	3.81678	0	0	0	0	0	0	0	0	0.493189	0	0	0	0.648301	0	0	0	0.204306	0	0	0.211625
1843	ENSG00000169814.8	<BTD>	9.24249	9.08699	9.59808	9.43317	7.76345	0	16.2639	7.76089	17.0278	4.35769	7.94399	8.04955	6.24706	8.13159	20.5537	6.21606	5.85661	5.62527	4.81409	11.2554	4.77735	0.518471	0.13674
1844	ENSG00000145741.11	<BTF3>	116.743	94.8063	84.1937	80.873	91.5539	120.233	122.7	95.9578	93.3478	85.3554	78.3076	107.04	142.422	97.9209	75.6205	114.444	106.101	78.3596	107.526	94.8166	117.192	-0.172663	-0.127285
1845	ENSG00000134717.13	<BTF3L4>	56.9836	57.6306	65.0724	50.3275	66.8753	82.4592	54.17	58.0356	71.1248	45.237	43.577	49.5831	64.541	72.3388	64.7236	104.51	56.6518	57.238	83.7195	43.22	46.5662	0.0147949	-0.075188
1846	ENSG00000133639.3	<BTG1>	2.67083	16.0034	9.84131	4.50926	8.34799	16.4081	13.9907	7.76089	1.22023	20.0592	7.14782	12.9286	8.37142	15.8134	0	2.89829	43.1001	7.09428	9.5052	1.22584	48.7911	0.113064	-0.237619
1847	ENSG00000159388.5	<BTG2>	12.0363	29.0452	39.5898	14.5298	36.1503	24.9263	11.0706	35.2391	23.6651	24.0365	18.188	22.1054	37.8784	35.9085	13.1702	22.8049	37.5846	23.0564	18.413	4.66189	74.8509	0.100217	-0.142319
1848	ENSG00000154640.10	<BTG3>	76.2593	61.4567	97.9641	47.5978	64.4092	74.8836	75.7197	67.8313	62.7865	46.2399	44.5854	51.9258	64.343	63.5775	87.7009	82.6965	65.4272	64.816	56.9433	81.3695	91.9769	0.0285253	-0.0537681
1849	ENSG00000137707.9	<BTG4>	0.632566	0	0	0	0.219203	0	0.240263	0.180067	0	0	0	0	0	0	0	0	0	0	0	0	0.241455	0	0.487191
1850	ENSG00000010671.11	<BTK>	13.3542	11.092	13.2465	5.77047	12.0379	15.1164	8.9082	9.81366	4.08593	3.33744	20.5411	11.6076	7.90335	18.8898	2.87452	6.63555	2.84301	15.6755	3.3031	4.10469	6.41579	0.618208	0.0666553
1851	ENSG00000186265.5	<BTLA>	0.404139	0.93813	0.355485	1.123	1.13255	0.139643	0.240263	0	0	0.276679	0.300775	0.616486	0.23404	0.0179902	0	0.24788	0.644416	0	0.52709	0.408612	0	0.125907	0.373354
1852	ENSG00000124557.8	<BTN1A1>	0	0	0	0	0	0	0	0	0	0	0	0	0	0	0	0	0	0	0	0	0	0	1
1853	ENSG00000112763.11	<BTN2A1>	33.6314	39.475	38.3175	40.3069	25.1353	57.0965	35.3371	32.214	29.2856	33.6683	40.7638	46.5183	58.834	31.8068	27.4864	42.5209	27.7668	46.8294	34.0852	15.9544	36.8391	-0.0932192	-0.0531351
1854	ENSG00000124508.12	<BTN2A2>	34.756	19.1121	40.2072	29.9754	24.4412	30.0058	19.6091	21.572	18.1001	18.5202	25.672	36.5488	29.399	22.8296	11.5169	17.3897	20.754	28.5921	15.3735	9.36093	33.2862	0.0109034	0.24171
1855	ENSG00000026950.12	<BTN3A1>	66.5951	21.1171	58.3369	66.6541	31.7479	46.0647	13.9537	29.6391	23.1659	35.3803	53.3433	84.9166	36.2042	32.4184	28.0688	24.3685	18.6312	63.759	21.435	14.3943	50.671	0.0493577	0.0116412
1856	ENSG00000186470.9	<BTN3A2>	21.5424	8.07528	21.8529	34.9338	13.3531	15.3084	7.78081	11.5423	15.179	17.2405	14.1187	37.7642	20.8656	11.3339	13.6211	12.6419	14.0634	16.8937	15.0396	7.225	11.8485	0.112419	0.0648988
1857	ENSG00000111801.11	<BTN3A3>	27.1827	13.3362	24.6033	33.8799	24.9709	12.6901	11.4587	14.5494	19.2094	17.5864	20.665	22.3344	19.0832	11.3339	9.39385	15.9406	12.9831	32.0855	6.74676	16.0845	7.968	0.200966	0.387117
1858	ENSG00000204290.6	<BTNL2>	1.14213	0.128763	0	0	0	0	2.92011	0.774289	0.184884	1.34881	1.22079	0.827853	0	0.215883	0	0	0.568603	0.680765	0.948763	0	1.08655	-0.702148	0.137829
1859	ENSG00000168903.8	<BTNL3>	0	0	0	0	0	0	0	0	0	0	0	0	0	0	0	0	0	0	0	0	0	0	1
1860	ENSG00000113303.7	<BTNL8>	0.105428	0.165552	0.467743	0.120938	0	0.209464	0	0.10804	0.277326	0.103755	0	0	1.11619	0.0899512	0	0.152541	0.189534	0	0	0.222879	0.258701	0.0587919	-0.0782363
1861	ENSG00000165810.12	<BTNL9>	22.1749	26.0469	21.2729	92.9322	28.8252	64.131	18.186	44.5666	49.3639	45.3234	13.1987	40.7586	600.564	27.8849	16.0259	37.5824	25.2649	21.9994	29.2359	6.87211	32.7688	0.390022	-0.206331
1862	ENSG00000166167.13	<BTRC>	11.4038	13.6857	12.1239	14.288	12.4033	12.5679	12.2164	14.0092	13.6444	17.2405	12.7918	15.3593	12.8542	13.2408	9.7696	15.5592	12.8315	14.7618	11.104	10.271	12.5556	0.0294224	0.209932
1863	ENSG00000169679.10	<BUB1>	0.210855	0.643815	0.411614	0.32826	1.31522	1.04732	0.129372	1.29648	0.961395	0.639819	0.353853	1.5148	0.342058	0.611668	0.225452	2.24998	0.284301	0.268723	0.474381	0.687211	0.189714	0.419273	0.0571188
1864	ENSG00000156970.8	<BUB1B>	1.05428	0.735788	1.06645	0	0.127869	1.43134	0.554452	1.45854	1.64546	0.207509	0.619242	2.94152	0	0.0179902	0.281815	2.13558	0.113721	0.0179149	0.474381	0.538625	1.13829	0.51774	0.0675678
1865	ENSG00000154473.13	<BUB3>	88.401	55.3313	77.0653	107.358	84.4481	94.4859	52.5066	65.0042	79.2042	68.9967	71.9383	75.088	66.6473	102.418	46.5559	71.9232	55.6852	86.7975	73.2656	58.543	65.7964	0.118714	0.298328
1866	ENSG00000137656.7	<BUD13>	3.3034	2.48329	2.02065	0.60469	0	0	9.68443	9.63359	1.36814	5.30877	8.06784	0	0	0	0	0	0	2.14978	2.61788	8.48799	6.84696	2.46046	0.173885
1867	ENSG00000106245.5	<BUD31>	94.7794	89.8766	96.7854	64.2354	82.6579	106.46	82.0404	80.7781	99.0607	99.172	102.317	91.786	96.2264	84.9499	121.519	158.7	124.77	97.6539	98.3902	129.103	115.984	-0.14744	-0.866392
1868	ENSG00000112276.9	<BVES>	0	0.257526	0	0	0	0	0	0	0	0	0	0.176139	0	0	0	0	0	0	0	0	0	0	0.109342
1869	ENSG00000212952.5	<BX088651.1>	0	0	0	0	0	0	0	0	0	0	0	0	0	0	0	0	0	0	0	0	0	0	1
1870	ENSG00000268708.1	<BX088651.2>	0	0	0	0	0	0	0	0	0	0	0	0	0	0	0	0	0	0	0	0	0	0	1
1871	ENSG00000196400.3	<BX255923.1>	0	0	0	0	0	0	0	0	0	0	0	0	0	0	0	0	0	0	0	0	0	0	1
1872	ENSG00000269647.1	<BX842679.1>	0	0	0	0	0	0	0	0	0	0	0	0	0	0	0	0	0	0	0	0	0	0	1
1873	ENSG00000112578.5	<BYSL>	3.79539	6.43815	1.87097	8.41383	11.4716	18.1885	5.47059	5.74414	7.93151	12.0701	5.20163	6.93988	6.10304	16.3351	20.1404	8.37071	6.21672	7.36301	20.2578	2.69312	8.45091	-0.033068	-0.217574
1874	ENSG00000005379.11	<BZRAP1>	63.3444	42.1055	36.2781	77.4695	25.9756	61.6	39.2367	55.9649	31.5781	65.4172	76.9807	64.6078	38.9766	78.6533	44.2262	26.3515	39.4421	95.4325	68.3109	20.542	71.781	-0.394376	-0.235157
1875	ENSG00000082153.13	<BZW1>	120.117	175.89	162.55	114.857	261.71	175.584	182.895	150.23	252.644	107.991	145.929	127.824	178.77	216.081	185.716	408.658	241.144	166.196	237.208	154.288	123.642	-0.0802837	-0.293034
1876	ENSG00000136261.10	<BZW2>	19.6095	49.537	30.7962	10.2279	25.9756	55.1066	35.5958	22.3463	29.3595	23.6214	35.6507	29.5209	12.3501	46.3788	66.6963	32.3388	26.8001	23.9163	44.258	13.8742	32.6136	-0.221365	-0.141636
1877	ENSG00000165507.8	<C10orf10>	35.9157	22.3864	25.7259	20.9741	34.4332	38.0876	8.87123	41.7216	26.198	20.3878	23.5312	15.4474	58.888	39.3447	17.4162	49.1755	15.447	11.6984	78.1851	9.1752	145.131	0.13901	-0.348983
1878	ENSG00000214688.4	<C10orf105>	0	0	0	0	0	0.733126	0	0	0	0	0	1.03922	0	0	0	0	0.77709	0	0	0	0	0	-0.206689
1879	ENSG00000183346.6	<C10orf107>	0	0	0	0	4.09179	0	0	0	0	0	0	0.158525	0.162028	0	0	0	1.83848	0	2.26649	0	0	0	0.00512006
1880	ENSG00000148655.10	<C10orf11>	3.86568	0.551841	5.66904	4.57837	3.12365	1.60589	4.15839	6.37438	3.84558	0.778159	1.85773	4.65007	4.24872	1.87099	2.2921	3.90887	3.54429	7.43467	4.33971	6.83496	5.38099	-0.124658	-0.281562
1881	ENSG00000176236.4	<C10orf111>	0	0	0	0	0	0	0	0	0	0	0	0	0	0	0	0	0	0	0	0	0	0	1
1882	ENSG00000204740.5	<C10orf112>	5.93909	2.15218	0.598711	8.362	0.584542	0.907679	2.36566	1.31449	4.86244	4.82458	5.82088	8.31376	1.09819	0.503727	0.73272	2.21185	3.77173	2.66931	3.77748	0.91009	2.29382	-0.0181336	0.0762375
1883	ENSG00000204683.6	<C10orf113>	0	0	0	0	0	0	0.295708	0	0	0	0	0	0	0	0	0	0	0	0	0	0	0	0.323463
1884	ENSG00000204566.6	<C10orf115>	0	0	0	0	0	0	0	0	0	0	0	0	0	0	0	0	0	0	0	0	0	0	1
1885	ENSG00000165813.12	<C10orf118>	19.7325	14.2559	17.8304	12.3184	16.0932	20.3704	11.5326	23.4808	22.334	9.78751	10.7925	23.1799	29.471	16.4971	5.61752	12.108	11.3152	14.8335	10.5594	7.26215	15.3669	0.469864	0.298061
1886	ENSG00000155640.5	<C10orf12>	0	0	0	0	0	0	0	0	0	0	0	0	0	0	0	0	0	0	0	0	0	0	1
1887	ENSG00000183559.7	<C10orf120>	0	0	0	0	0	0	0	0	0	0	0	0	0	0	0	0	0	0	0.263545	0	0	0	-0.285336
1888	ENSG00000204365.2	<C10orf126>	0	0	0	0	0	0	0	0	0	0	0	0	0	0	0	0	0	0	0	0	0	0	1
1889	ENSG00000204161.9	<C10orf128>	23.7212	64.7862	57.4762	58.4476	47.2566	40.4092	73.3355	60.3225	76.3755	48.8684	44.6916	53.2292	206.495	57.8746	53.5073	86.2621	83.3951	56.1452	45.2771	53.7139	50.2225	0.108835	-0.340573
1890	ENSG00000173124.10	<C10orf129>	0.42171	0.220737	0.879357	0.501029	0	0	0	0	0.517674	0.0864621	0	0	0.0720123	0.359805	0.131514	0.0762707	0	0	0	0	0.120727	0.386478	0.598934
1891	ENSG00000173088.8	<C10orf131>	0	0	0	0	0	0	0.517489	0	0	0	0	0	0	0	0	0	0	0	0	0	0	0	0.320381
1892	ENSG00000107938.13	<C10orf137>	41.9953	34.5821	33.4717	35.9013	40.2969	63.1186	40.7153	35.6533	30.9126	32.3368	29.8298	46.7649	40.0208	53.0172	21.6058	33.6544	25.5871	35.8297	50.6007	30.7945	52.6371	-0.00208292	0.0472979
1893	ENSG00000107815.3	<C10orf2>	3.11011	1.60034	2.33871	4.06006	1.13255	9.583	1.81121	0.522195	3.43884	0.847328	2.12312	0	0.558095	4.73143	3.23148	1.71609	3.20313	2.86638	7.7658	0.687211	0	-0.0267303	0.11419
1894	ENSG00000165511.4	<C10orf25>	0	0	0	0	0	0	0	0	0	0	0	0	0	0	0	0	0	0	0	0	0	0	1
1895	ENSG00000166275.11	<C10orf32>	10.5076	14.3111	12.3671	13.4241	13.7185	7.33126	12.9372	17.4845	15.5302	12.1566	9.8548	5.75974	11.558	14.3922	18.1677	16.3791	10.2538	14.9052	6.04397	16.5674	17.402	-0.122418	0.0256656
1896	ENSG00000171224.7	<C10orf35>	1.2827	2.097	0.598711	1.52036	0.47494	0	1.38613	0.774289	1.83035	2.33448	0.566164	0	0	0.71961	0.619994	0.533895	0.66337	1.66608	1.31773	0.780077	1.36249	0.657011	0.523952
1897	ENSG00000235931.2	<C10orf40>	0.0175713	0	0	0	0	0	0	0	0	0	0	0	0	0	0	0	0	0	0	0	0	0	0.420517
1898	ENSG00000178645.8	<C10orf53>	0	0	0	0	0	0	0	0	0	0	0	0	0.0540092	0	0	0	0	0	0	0	0	0	-0.226212
1899	ENSG00000107738.15	<C10orf54>	178.331	278.79	225.059	166.687	144.491	184.573	228.545	267.778	272.278	155.563	232.994	204.867	187.7	247.276	266.954	343.866	283.847	267.756	132.335	192.103	145.269	-0.18554	-0.216613
1900	ENSG00000222047.4	<C10orf55>	0.632566	0.386289	0.149678	0.259153	0.730678	0.523661	0.554452	0.216081	0	0.328556	0	0.915923	0.396067	0.107941	0.601206	0.362286	0.360115	0.967402	1.00147	0	1.56945	-0.0636011	-0.351188
1901	ENSG00000203942.3	<C10orf62>	0	0	0	0	0	0	0	0	0	0	0	0	0	0	0	0	0	0	0	0	0	0	1
1902	ENSG00000179133.7	<C10orf67>	2.63569	1.50837	3.44259	1.36487	1.42482	0.733126	1.38613	0.558208	1.84884	1.46986	1.46849	1.09206	0.432074	1.49319	1.80362	0.629233	0.871858	0.985317	1.58127	0.687211	1.75917	0.290607	0.485024
1903	ENSG00000150076.18	<C10orf68>	4.93753	3.03513	2.28259	0.863843	2.88618	3.4038	1.55247	3.38526	2.53291	4.21935	2.49466	7.20408	1.65628	3.27422	0.676357	2.38346	6.04614	0.895743	1.51099	1.33728	2.56977	0.263244	0.0743819
1904	ENSG00000177354.7	<C10orf71>	0	0.110368	0	0	0.0365339	0.192009	0.0184817	0.10804	0.0369767	0.0345848	0.0884632	0.193753	0.324055	0.0899512	0.0751508	0	0.132674	0.143319	0	0.0928664	0.0517403	-0.139549	-0.476588
1905	ENSG00000120029.8	<C10orf76>	30.9254	41.5169	41.9846	32.5323	37.0819	45.2443	42.8407	39.9749	38.0676	35.7261	34.5183	36.3199	37.9325	41.1617	35.3584	34.2837	35.6893	37.7466	42.1848	39.8582	35.3731	0.102144	0.239316
1906	ENSG00000165863.12	<C10orf82>	69.1078	32.6138	31.8252	64.9437	46.4528	30.5469	30.5873	38.3003	33.7043	87.6034	41.0115	80.7597	2.79047	36.1424	80.5053	13.9766	25.3028	61.9854	25.0544	40.304	33.2517	-0.00552704	0.200215
1907	ENSG00000177234.5	<C10orf85>	0	0	0	0	0	0	0	0	0	0	0	0	0	0	0	0	0	0	0	0	0	0	1
1908	ENSG00000119965.8	<C10orf88>	6.44865	6.12544	11.5813	4.50926	3.72646	23.6171	8.40919	10.0477	8.37523	6.3809	4.52931	9.38821	9.55963	8.45541	5.52358	9.09528	5.89452	8.61705	3.77748	2.67455	10.1583	-0.178728	0.296568
1909	ENSG00000154493.13	<C10orf90>	0	0	0	0	0.42014	0.22692	0.11089	0.0900336	0.0739535	0.224801	0	0.546031	0.342058	0	0	0.667368	0	0.107489	0.281115	0	0	0.219075	-0.215161
1910	ENSG00000180066.5	<C10orf91>	0	0	0	0	0	0	0	0.0720269	0.258837	0	0	0	0	0	0	0	0	0	0	0.0928664	0	0	0.291045
1911	ENSG00000120055.5	<C10orf95>	0	0	0	0	0	0	0	0	0	0	0	0	0	0	0	0	0	0	0	0	0	0	1
1912	ENSG00000188373.4	<C10orf99>	0.42171	0.128763	0	0	0	0	0.443562	0	0	0	0	0.510803	0	0	0	0	0.322208	0	0.474381	0	0.120727	0	-0.107501
1913	ENSG00000137720.3	<C11orf1>	34.7033	47.9918	41.8162	33.0161	26.8159	36.0453	57.3858	45.1608	57.5728	41.8131	38.0745	35.9324	34.0258	23.5312	52.5116	46.7539	43.0243	39.0007	21.7161	54.2897	29.5954	0.133508	0.28444
1914	ENSG00000176029.9	<C11orf16>	0	0.165552	0	0	0	0	0	0.216081	0	0	0.0707705	0	0	0.143922	0.0751508	0.190677	0	0	0	0	0	0	-0.0421486
1915	ENSG00000110665.7	<C11orf21>	0.96642	2.64884	1.98323	1.45126	2.52084	0.436384	1.12739	3.60134	1.47907	0.172924	2.44158	2.50117	1.83631	1.58314	0.770295	0.476692	0.416975	2.59765	1.28259	2.39595	0.896831	-0.0841118	0.0561389
1916	ENSG00000171067.6	<C11orf24>	12.0187	35.2075	6.96001	7.96463	22.2309	16.9317	30.5873	13.9012	32.9833	4.85917	10.0494	5.42508	5.90501	14.1583	9.14961	3.03176	18.2521	6.70016	17.8508	7.31787	18.7472	0.721977	0.61464
1917	ENSG00000158636.12	<C11orf30>	27.2355	23.0854	22.4704	34.5364	28.2407	17.5776	14.7299	24.9033	25.8467	23.6042	34.3237	24.8884	25.7264	32.7782	19.8774	23.1291	22.6873	21.8203	29.7279	13.6142	13.7457	0.0670818	0.0431865
1918	ENSG00000211450.5	<C11orf31>	179.209	208.247	194.562	156.632	182.633	128.489	248.487	150.572	235.819	206.299	209.569	156.957	164.44	146.081	256.17	159.558	196.888	177.895	176.804	158.281	162.878	0.19719	0.211503
1919	ENSG00000188771.3	<C11orf34>	0	0	0	0	0	0	0	0	0	0	0	0	0	0	0	0	0	0	0	0	0	0	1
1920	ENSG00000185522.4	<C11orf35>	1.56384	3.29265	1.64645	0.88112	0.968148	4.03219	1.88514	1.6206	1.94128	1.97134	1.50387	1.00399	2.08836	2.12285	0.695145	0.552962	1.80058	1.64817	0.316254	0.315746	2.22483	0.177226	0.556719
1921	ENSG00000171987.1	<C11orf40>	0	0	0	0	0	0	0	0	0	0	0	0	0	0	0	0	0	0	0	0	0	0	1
1922	ENSG00000180878.2	<C11orf42>	0	0	0	0	0	0	0	0	0	0	0	0	0	0	0	0	0	0	0	0	0	0	1
1923	ENSG00000175728.2	<C11orf44>	0	0	0	0	0	0	0	0	0	0	0	0	0	0	0	0	0	0	0	0	0	0	1
1924	ENSG00000174370.5	<C11orf45>	0.0351425	0	1.3471	0	0.23747	0	0.332671	0.432161	0	0	0.654627	1.33866	0.23404	0	0	0	0	1.55859	0.650078	0.928664	0.275948	-0.584203	-0.387849
1925	ENSG00000162194.8	<C11orf48>	115.742	196.29	101.238	158.809	219.404	114.315	147.521	111.894	200.211	148.991	134.004	91.3457	120.783	141.259	203.752	160.531	120.449	124.222	158.9	210.584	87.4238	0.145302	0.176724
1926	ENSG00000149179.9	<C11orf49>	27.2003	48.7092	36.5775	19.7475	34.7985	45.2094	43.9311	45.683	56.7963	36.7464	40.6931	47.628	30.6592	44.4539	39.1535	30.6989	35.1586	38.1945	38.1965	64.8207	51.9817	0.0424885	-0.164646
1927	ENSG00000149300.5	<C11orf52>	1.14213	1.94984	0.767098	1.93501	0	8.95461	2.64289	1.3325	0	0	0.300775	1.28581	0.88215	0	0	1.2966	3.63906	3.8517	2.7233	0	2.27657	-0.0397232	0.130937
1928	ENSG00000150750.6	<C11orf53>	0	0	0	0	0	0	0	0	0	0	0	0	0	0	0	0	0	0	0	0	0	0	1
1929	ENSG00000182919.10	<C11orf54>	25.4783	20.2894	25.4639	19.1082	23.1259	44.7905	22.9913	24.3451	23.6281	11.2574	17.3742	32.163	25.8344	23.7651	18.5247	32.7773	22.3082	23.5939	16.8142	5.31196	15.5738	0.0660726	0.240928
1930	ENSG00000150776.13	<C11orf57>	30.9254	27.4081	36.1846	29.7508	23.9114	34.806	26.5398	30.5754	29.3965	31.403	19.1965	30.2607	28.2648	33.6957	20.1968	35.9235	28.904	29.5237	26.3194	23.7924	28.8711	0.062107	0.376139
1931	ENSG00000110696.5	<C11orf58>	297.13	296.688	315.034	296.298	246.458	270.017	330.472	268.03	281.818	238.618	235.224	301.339	263.853	252.115	311.462	365.985	309.339	271.41	201.454	340.169	236.901	0.0907234	0.056138
1932	ENSG00000109944.6	<C11orf63>	6.78251	9.65722	4.56517	2.38421	1.84496	17.5427	6.91217	9.03937	8.91139	12.6408	3.41468	4.80859	3.61862	5.82884	5.20419	1.96397	6.25463	6.05522	1.98537	8.63657	6.10535	0.560389	0.609302
1933	ENSG00000166323.8	<C11orf65>	5.32409	1.398	2.07678	2.28055	2.75831	3.12451	1.21979	2.28685	1.33116	3.45848	1.29156	4.22734	0.972165	1.90697	0.544843	4.99573	1.28883	2.50808	1.44071	2.47025	1.25901	0.520416	0.238285
1934	ENSG00000175573.6	<C11orf68>	77.9286	95.8364	72.5189	76.4847	54.1432	100.962	84.4985	79.4996	92.6637	91.4942	106.12	89.6019	87.2068	95.7261	107.954	73.1054	98.7094	99.4991	77.8864	99.0141	56.2589	-0.22205	-0.361242
1935	ENSG00000137691.8	<C11orf70>	5.69309	6.38296	7.91421	4.59565	2.99578	9.33863	4.84222	7.20269	9.28116	3.56224	7.57245	7.08079	4.66279	8.05963	6.04964	13.1186	10.8414	8.5633	4.4627	9.63953	2.56977	-0.304151	-0.351547
1936	ENSG00000180425.7	<C11orf71>	0	0	0	0	0	0	0	0	0	0	0	0	0	0	0	0	0	0	0	0	0	0	1
1937	ENSG00000184224.3	<C11orf72>	0.263569	0.220737	0.523872	0.535583	1.09602	0.384018	0	0.558208	0	0.795451	0.106156	0.563645	0	0.305834	0.112726	0	0	0.214978	0.052709	0.0371465	0	0.787386	0.808369
1938	ENSG00000149196.11	<C11orf73>	68.7739	51.2477	49.693	44.0733	46.7451	98.8149	54.133	53.7861	49.253	63.2211	53.2194	46.2013	59.4281	73.5981	28.2003	39.5654	38.1532	53.5117	56.6446	48.9591	48.1184	0.100214	0.415144
1939	ENSG00000166352.11	<C11orf74>	25.777	19.0017	20.1691	35.9704	13.7367	12.1664	25.7266	42.6219	29.5444	25.0394	24.5751	26.7907	13.8084	20.347	37.6317	46.9637	22.7252	33.0529	22.7527	35.475	24.9905	0.0220426	-0.23525
1940	ENSG00000173715.11	<C11orf80>	48.4967	21.393	23.3497	39.0112	22.5597	50.6206	32.3615	28.6667	25.0148	50.7532	31.8467	43.295	39.0847	27.4711	21.2301	11.5931	17.494	37.1375	26.7938	35.7907	29.0263	0.0709246	0.328113
1941	ENSG00000165490.8	<C11orf82>	0.702851	0	0.280646	0.172769	1.88149	0.139643	0.332671	1.20645	0.573139	0	0.33616	0	1.69229	0	0.695145	0	0.246395	0.107489	0.931193	0.0185733	0.258701	0.11202	0.174959
1942	ENSG00000204922.4	<C11orf83>	15.4276	19.7927	12.7974	17.4151	15.4356	8.9197	26.7431	15.9359	19.043	20.7855	16.1357	15.8173	11.648	14.5361	24.687	12.68	18.4606	19.5451	13.7571	24.9439	17.5572	0.0460719	-0.00321498
1943	ENSG00000168005.4	<C11orf84>	4.81453	4.81941	2.97484	11.9901	8.6768	0	3.19734	4.35762	4.04895	6.65758	5.14856	6.35862	2.23238	10.1105	8.17265	3.68006	4.49196	10.4981	8.83755	2.67455	4.51865	-0.151329	-0.206058
1944	ENSG00000168070.7	<C11orf85>	0	0	0	0	0	0	0.184817	0	0	0.0345848	0.300775	0	0.324055	0.323824	0	0.362286	0	0	0	0	0	0	-0.544117
1945	ENSG00000173237.4	<C11orf86>	0	0	0	0	0	0	0	0	0	0	0	0	0	0	0	0	0	0	0	0	0	0	1
1946	ENSG00000185742.6	<C11orf87>	0	0	0	0	0	0	0	0	0	0	0	0	0	0	0	0	0	0	0	0	0	0	1
1947	ENSG00000183644.9	<C11orf88>	0.228426	0.294315	0.0561291	0	0	0.750581	0.129372	0	0.0184884	0.207509	0.212312	0.0352278	0.252043	0.413776	0.112726	0.0762707	0.871858	0.752424	0	0.0371465	0.327688	-0.265083	-0.29727
1948	ENSG00000184682.5	<C11orf89>	0	0	0	0	0	0	0	0	0	0	0	0	0	0	0	0	0	0	0	0	0	0	1
1949	ENSG00000205177.5	<C11orf91>	1.37056	1.14047	0	0	0	0	0.73927	0	0	0	0	0	0	0.629659	0	0	0.928718	0.214978	0	0	0	0	0.260672
1950	ENSG00000234776.1	<C11orf94>	0	0	0	0	0	0	0	0	0	0	0	0	0	0	0	0	0	0	0	0	0	0	1
1951	ENSG00000187479.4	<C11orf96>	180	254.987	206.349	380.281	189.483	96.9995	374.274	302.657	191.595	421.036	345.608	351.979	929.174	126.004	228.233	353.476	977.959	319.404	815.093	206.108	559.95	-0.608591	-0.670511
1952	ENSG00000139637.9	<C12orf10>	29.2386	31.5837	19.5329	29.0424	24.3316	25.5198	29.9035	29.9452	46.905	31.2474	24.3451	25.5578	32.8196	35.9625	24.067	23.682	31.0457	29.3266	32.3458	29.1786	48.5496	0.011773	-0.0890335
1953	ENSG00000151135.5	<C12orf23>	41.9075	22.5335	26.7549	46.1638	29.428	47.9848	38.4975	30.6834	30.8201	35.8818	39.1361	37.6409	34.7639	34.991	36.8427	47.8789	37.831	51.7381	27.2154	42.3656	49.6534	-0.179317	-0.441397
1954	ENSG00000133641.13	<C12orf29>	27.7275	16.1873	18.4852	24.1876	23.1077	29.6218	24.784	17.1064	25.2181	23.0508	14.9857	18.9878	11.63	20.5269	19.7271	19.3537	20.773	22.4115	20.8025	17.626	11.9348	0.282476	0.848472
1955	ENSG00000180861.5	<C12orf36>	0	0	0	0	0	0	0.147854	0	0	0	0	0	0	0	0.112726	0	0	0	0	0	0	0	0.0941701
1956	ENSG00000134548.5	<C12orf39>	0.333854	0	0.280646	0.259153	0.200936	5.46353	0.369635	1.45854	0.277326	0.760866	0.477701	0.475575	2.3404	0.251863	0.319391	0.533895	0.341162	2.1677	2.93414	0	1.41423	-0.276378	-0.042402
1957	ENSG00000047621.7	<C12orf4>	6.67708	2.96155	8.21357	3.31716	5.05994	6.77269	4.8607	4.44766	6.61884	3.52765	6.79397	6.09441	9.32559	8.13159	3.55087	2.97456	6.33044	4.55037	7.66038	2.21022	12.6246	-0.322994	-0.323689
1958	ENSG00000180116.11	<C12orf40>	0.0351425	0	0	0	0	0.209464	0	0.0720269	0	0	0	0	0.270046	0.071961	0.0187877	0.0762707	0	0	0.0878484	0	0.155221	-0.0532162	-0.26519
1959	ENSG00000179088.10	<C12orf42>	0.105428	0.0735788	0	0.812013	0	0.244375	0.221781	0.0900336	0.203372	0.224801	0.176926	0.0880695	0.216037	0	0	0.286015	0.435929	1.27196	0.175697	0.260026	0.206961	-0.111458	-0.20056
1960	ENSG00000157895.7	<C12orf43>	18.6255	19.5904	23.3123	15.8256	20.4042	20.9639	26.4104	16.4041	23.2953	14.2317	13.4641	26.051	20.3975	24.4308	20.3283	13.6143	21.8912	20.7454	23.1568	18.4247	27.3706	-0.0517194	-0.16832
1961	ENSG00000123395.10	<C12orf44>	10.0508	14.072	4.41549	5.64953	2.1555	14.3658	13.2699	12.2626	11.1485	5.68921	8.61631	7.89103	6.85917	8.61733	6.4066	12.7753	7.18335	7.70339	3.1274	3.21318	6.64	0.530704	0.410695
1962	ENSG00000151131.5	<C12orf45>	12.5283	9.62043	12.4981	12.543	15.9105	10.6129	10.165	11.1462	13.8848	15.1655	13.9241	14.3553	15.1586	11.8196	17.2283	19.9448	12.8694	11.5193	17.0426	13.5213	11.6071	-0.148506	-0.599046
1963	ENSG00000111412.4	<C12orf49>	5.67552	3.88128	5.07033	9.91692	8.56719	5.07951	8.61249	10.5879	7.33988	8.52516	5.07779	9.22968	5.23889	7.7358	14.2411	8.1991	2.25546	7.81088	11.6487	8.65515	4.39792	0.0209631	-0.0866132
1964	ENSG00000078237.4	<C12orf5>	0	0	0	0	0	0	0.572934	0	0	0	0	0	0	0	0	0	0	0	0	0	0	0	0.319981
1965	ENSG00000165805.5	<C12orf50>	0.42171	0.0919736	0.149678	0	1.62576	0	0	0.540201	0.240349	0.293971	0.0707705	0.299436	0.576098	0	0.187877	0	0.0189534	0.304553	0.298685	0.11144	0.0172468	0.18483	0.3171
1966	ENSG00000139405.11	<C12orf52>	1.93284	5.77594	4.73356	1.43398	4.23793	0	6.50557	2.03476	3.23546	10.1679	3.27314	3.71653	4.19471	3.20226	4.37753	3.96607	2.99464	2.13187	8.52129	4.75476	4.72561	-0.0760673	-0.0477297
1967	ENSG00000177627.5	<C12orf54>	1.91527	0.423078	2.86259	2.66064	4.11006	8.84987	4.28776	1.72864	0.721046	4.18477	1.36233	2.48356	1.22421	5.03727	1.70968	1.46821	2.4829	2.00646	3.91804	1.63445	7.79553	0.379931	0.109524
1968	ENSG00000188596.5	<C12orf55>	0.298712	0.515052	1.85226	0.760182	0.511474	0.401474	1.0165	0.900336	0.443721	0.951083	2.53005	0.299436	0.936159	1.4752	0.0751508	0.362286	0.473836	0.376212	0.56223	0.780077	0.500156	0.18579	0.00611344
1969	ENSG00000185306.8	<C12orf56>	29.8536	7.41307	8.2884	13.0786	10.3574	10.6827	7.31877	10.714	9.28116	12.5889	13.181	28.9572	0.126021	4.53354	7.94719	5.35801	9.17346	10.5698	14.741	7.00212	14.2458	0.188023	0.142528
1970	ENSG00000111678.6	<C12orf57>	94.8673	81.231	79.7034	48.2024	69.8893	72.946	107.083	85.3158	113.944	95.1602	75.9014	75.5988	78.0973	86.0833	93.9197	50.3768	99.316	85.7584	74.0913	129.957	108.896	-0.0421729	-0.0795911
1971	ENSG00000182993.3	<C12orf60>	3.49668	2.94315	2.65678	1.03661	1.47962	4.04965	2.3287	2.62898	1.16477	1.05484	1.46849	3.71653	0.396067	1.96094	0.469692	1.33474	0.473836	2.86638	1.59884	2.24737	1.72468	0.505158	0.420464
1972	ENSG00000221949.2	<C12orf61>	0	0	0	0	0	0	0	0	0	0	0	0	0	0	0	0	0	0	0	0	0	0	1
1973	ENSG00000130921.3	<C12orf65>	23.2995	27.2058	25.8381	26.8828	23.199	23.1458	27.6672	23.2107	23.2029	23.3102	26.4328	27.4425	25.8884	27.4171	30.1167	26.6757	21.7396	28.7892	23.3852	23.0866	17.3847	-0.178109	-0.147532
1974	ENSG00000174206.8	<C12orf66>	3.88325	3.66055	2.3013	3.29988	4.49367	2.7754	1.47854	3.25922	4.2893	3.99455	2.19389	3.73415	2.03435	2.50064	3.38178	3.7754	2.31232	2.18561	4.37485	2.1545	3.01818	0.407574	0.373804
1975	ENSG00000177875.3	<C12orf68>	0	0	0	0	0	0	0	0	0	0	0	0	0	0	0	0	0	0	0	0	0	0	1
1976	ENSG00000214700.5	<C12orf71>	0	0	0	0	0	0	0	0	0	0	0	0	0	0	0	0	0	0	0	0	0	0	1
1977	ENSG00000204954.5	<C12orf73>	20.7868	25.2375	24.6781	21.9934	26.0669	26.2005	22.9728	24.6512	24.2937	31.4549	24.7697	20.9429	13.6643	23.8191	14.5041	20.841	14.5941	29.5774	17.271	21.1735	21.5067	0.230897	0.805756
1978	ENSG00000214215.3	<C12orf74>	0	0	0	0	0	0	0	0	0	0	0	0	0	0	0	0	0	0	0	0	0	0	1
1979	ENSG00000235162.4	<C12orf75>	24.9161	21.5402	24.7342	30.9256	22.4318	14.5752	37.444	16.152	17.6934	13.0212	33.7752	39.0676	71.0761	30.0077	50.088	52.8174	32.2587	32.1751	14.0206	86.5515	31.4063	-0.608139	-0.935271
1980	ENSG00000174456.9	<C12orf76>	74.9063	34.95	39.2156	73.8759	40.5343	31.891	56.6096	36.7517	42.1165	73.4928	44.5854	57.4565	19.0292	37.3657	50.0692	25.093	29.719	59.6744	46.5421	37.5366	29.5782	0.136992	0.488332
1981	ENSG00000226397.3	<C12orf77>	0	0	0	0	0	0	0	0	0	0	0	0	0	0	0	0	0	0	0	0.0742931	0	0	-0.245892
1982	ENSG00000197595.1	<C13orf35>	0	0	0	0	0	0	0	0	0	0	0	0	0	0	0	0	0	0	0	0	0	0	1
1983	ENSG00000178734.4	<C13orf45>	0	0	0	0	0	0	0	0	0	0	0	0	0	0	0	0	0	0	0	0	0	0	1
1984	ENSG00000133935.6	<C14orf1>	0	0	0	0	0	0	0	0	0	0	0	0	0	0	0	0	0	0	0	0	0	0	1
1985	ENSG00000100557.5	<C14orf105>	0.105428	0	0	0.224599	0	0	0	0	0	0	0	0	0	0	0	0	0	0	0	0	0.137974	0	0.247251
1986	ENSG00000179933.4	<C14orf119>	46.4936	53.9149	62.9021	54.1802	63.4959	12.3933	58.4208	49.0323	63.7294	37.4381	60.5973	39.4023	51.7948	56.0036	57.3776	70.169	68.4029	50.502	53.9213	55.2183	34.8902	-0.0306374	-0.220836
1987	ENSG00000227051.4	<C14orf132>	8.31121	17.0703	12.9284	14.6853	8.32972	23.844	15.4138	20.3476	24.0903	12.6408	16.8434	13.3513	21.8557	17.1447	6.65084	28.9447	21.5311	25.26	8.55643	21.8422	15.798	-0.182362	-0.250473
1988	ENSG00000170270.4	<C14orf142>	0	2.17058	0	0	0	0	1.81121	1.40452	0	1.31422	0.442316	0	1.06218	0	0	0	0.0758137	0	0	1.57873	1.5867	0	0.215915
1989	ENSG00000228032.1	<C14orf144>	0	0	0	0	0	0	0	0	0	0	0	0	0	0	0	0	0	0	0	0	0	0	1
1990	ENSG00000133943.16	<C14orf159>	59.1097	54.0253	44.024	83.2572	30.9442	67.8316	46.9991	78.3292	48.7723	89.8687	61.3227	72.6397	49.1124	55.1221	39.2287	51.0632	43.7445	57.023	47.526	47.1018	56.6728	0.146327	0.356568
1991	ENSG00000215277.4	<C14orf164>	0	0.404684	0	0	0	0	0	0	0	0	0	0	0	0	0	0	0	0	0	0	0	0	0.321529
1992	ENSG00000087302.4	<C14orf166>	55.1562	40.0637	25.9691	32.0659	44.6079	70.5546	57.8294	43.3602	32.7059	43.8882	32.3068	63.5157	29.0389	49.0414	30.173	39.1841	35.8409	78.1446	30.2198	41.9942	43.1341	0.153009	0.0808441
1993	ENSG00000100565.11	<C14orf166B>	0.96642	0.459868	0	0	0	1.30915	0.42508	0.666248	0.277326	0.293971	0.920017	0.422734	0.216037	0	0.263028	0	0	0.573276	0	0	0.482909	0.263507	0.334807
1994	ENSG00000176605.3	<C14orf177>	0	0	0	0	0	0	0	0	0	0	0	0	0	0	0	0	0	0	0	0	0	0	1
1995	ENSG00000197734.4	<C14orf178>	0	0	0.710969	0.846566	0.456674	0	0.295708	0.360134	0.388256	0	0.389238	0	0	0	1.01454	0.686436	0	0.824084	0	0	0.983065	0.727565	-0.0883629
1996	ENSG00000184601.6	<C14orf180>	0.122999	1.69231	0.561291	0.138215	2.02763	4.52094	3.45609	2.53895	6.8407	1.02025	9.92557	17.6844	50.3546	7.376	1.20241	30.3557	2.36918	6.57475	7.78337	2.34023	4.91532	-1.73869	-0.692512
1997	ENSG00000214900.4	<C14orf182>	0.228426	0.588631	1.36581	0.345537	0.383606	0.0698215	0.166336	0.126047	0.462209	0.0172924	0.424623	0.0880695	0.450077	0.287844	0.638781	0.667368	0.568603	0.429957	0.421672	0	0.431169	-0.240833	-0.0547842
[truncated: 17,433 more rows]
