# Supplementary material for: Transcriptome Analysis of the Human Tibial Nerve Identifies Sexually Dimorphic Expression of Genes Involved in Pain, Inflammation, and Neuro-Immunity
Source: Front Mol Neurosci. 2019 Mar 5;12:37. doi: 10.3389/fnmol.2019.00037 (PMC6412153; doi:10.3389/fnmol.2019.00037)
Supplement: Supplementary file 4 [file Table_4.XLSX]

## Sheet: Fold change across tissues
Supplementary Table 4. Log2 fold change across tissues in samples from donors with no arthritis, diabetes, HIV, or sepsis (female: male, smoothing factor : 0.0001) Only effect sizes are shown, statistical hypothesis testing only performed for tibial nerve. Genes with analyzed (50th or 75th) percentiles < 0.5 TPM or maximum < 1.0 TPM in both cohorts marked as LOW_EXPR.
Gene #	Gene	Tib nerve	Sp cord	Caudate	Cerebellum	Fr cortex	Hippocampus	Hypothalamus	Nuc accumbens	L Ventricle	Aorta	Sk muscle	Lung	Sm Intestine - Terminal Ileum	Colon - Sigmoid	Liver	Adrenal Gland	Pituitary	Pancreas	Spleen	Skin (Not Sun Exposed)	Esophagus - Mucosa	Adipose - Subcutaneous	Wh blood	Tib nerve	Sp cord	Caudate	Cerebellum	Fr cortex	Hippocampus	Hypothalamus	Nuc accumbens	L Ventricle	Aorta	Sk muscle	Lung	Sm Intestine - Terminal Ileum	Colon - Sigmoid	Liver	Adrenal Gland	Pituitary	Pancreas	Spleen	Skin (Not Sun Exposed)	Esophagus - Mucosa	Adipose - Subcutaneous	Wh blood
		50th prctl	50th prctl	50th prctl	50th prctl	50th prctl	50th prctl	50th prctl	50th prctl	50th prctl	50th prctl	50th prctl	50th prctl	50th prctl	50th prctl	50th prctl	50th prctl	50th prctl	50th prctl	50th prctl	50th prctl	50th prctl	50th prctl	50th prctl	75th prctl	75th prctl	75th prctl	75th prctl	75th prctl	75th prctl	75th prctl	75th prctl	75th prctl	75th prctl	75th prctl	75th prctl	75th prctl	75th prctl	75th prctl	75th prctl	75th prctl	75th prctl	75th prctl	75th prctl	75th prctl	75th prctl	75th prctl
1	ZFY	Y chromosome genes not analyzed																							Y chromosome genes not analyzed
2	HSFY2
3	UTY
4	USP9Y
5	RPS4Y1
6	KDM5D
7	DDX3Y
8	NLGN4Y
9	EIF1AY
10	KIAA1279	-12.6016	0.0737644	0.0174513	0.0296149	0.0171901	0.113325	0.0942201	0.179374	-0.0301082	0.0959404	0.0793013	0.681023	0.0701146	0.0921999	0.0173098	-0.04882	-0.0159935	-0.156975	0.0917027	0.0171738	-0.00149994	0.0360744	0.0673045	-0.723734	-0.0764777	0.0589212	0.045778	0.0749449	0.0671194	0.12677	0.0520107	0.0718951	-0.0623301	0.0861916	0.0555925	-0.0199506	0.0283888	0.0553111	-0.137209	-0.0130632	-0.199959	0.120524	0.0968107	0.0153792	0.0991497	0.145951
11	CADPS	-2.31159	0.339901	0.0786972	-0.158023	0.0448944	-0.0916795	0.321853	0.147927	-0.803159	LOW_EXPR	LOW_EXPR	-0.61359	-0.127942	-0.227169	LOW_EXPR	LOW_EXPR	0.205575	-0.293142	LOW_EXPR	-0.454665	LOW_EXPR	-2.34919	LOW_EXPR	-2.2027	0.120281	0.027746	-0.122454	0.0292489	-0.170069	-0.110021	0.0408897	-0.37731	LOW_EXPR	LOW_EXPR	-0.342707	-0.207037	-0.110083	LOW_EXPR	-0.198443	0.189177	-0.11366	-0.569627	-0.514815	LOW_EXPR	-2.06813	LOW_EXPR
12	SEL1L2	-1.73061	LOW_EXPR	LOW_EXPR	LOW_EXPR	LOW_EXPR	LOW_EXPR	LOW_EXPR	-0.208985	LOW_EXPR	LOW_EXPR	LOW_EXPR	LOW_EXPR	LOW_EXPR	LOW_EXPR	LOW_EXPR	LOW_EXPR	LOW_EXPR	LOW_EXPR	LOW_EXPR	LOW_EXPR	LOW_EXPR	LOW_EXPR	LOW_EXPR	-0.828504	0.0537384	LOW_EXPR	LOW_EXPR	LOW_EXPR	LOW_EXPR	LOW_EXPR	-0.193703	LOW_EXPR	LOW_EXPR	LOW_EXPR	LOW_EXPR	LOW_EXPR	LOW_EXPR	LOW_EXPR	LOW_EXPR	LOW_EXPR	LOW_EXPR	LOW_EXPR	LOW_EXPR	LOW_EXPR	0.305671	LOW_EXPR
13	HSD11B1	-1.60627	-0.287215	-0.133018	0.287162	0.439691	0.412234	0.346194	0.068154	-0.37046	-0.15395	-0.495913	-0.377883	0.0265919	-0.306672	0.0376739	0.302798	-0.416562	-0.443001	-0.184961	0.090227	0.0951279	-0.094083	LOW_EXPR	-1.4211	0.190209	-0.264185	0.489165	0.814212	0.32898	0.388926	0.607874	-0.235171	0.223961	-0.496132	-0.24249	-0.737942	-0.327941	0.0324259	0.0888853	-0.156379	-0.370955	-0.161334	0.157336	-0.183487	-0.249318	0.286928
14	SLITRK4	-1.13035	0.378592	0.175346	0.0548002	0.132513	0.19841	0.201787	-0.00852605	LOW_EXPR	-0.369951	-0.176538	LOW_EXPR	LOW_EXPR	-0.257921	LOW_EXPR	-0.0805465	LOW_EXPR	LOW_EXPR	LOW_EXPR	-0.160006	LOW_EXPR	-0.799512	LOW_EXPR	-1.2356	0.380751	0.0137079	0.20814	0.157111	0.0515538	-0.0161084	-0.0725438	-0.631812	-0.591123	0.237547	-0.426952	-0.236295	-0.188758	LOW_EXPR	-0.367724	LOW_EXPR	LOW_EXPR	LOW_EXPR	0.147532	LOW_EXPR	-0.925242	LOW_EXPR
15	NOX5	-1.07648	LOW_EXPR	-0.613788	-0.993673	LOW_EXPR	LOW_EXPR	-0.757659	-0.921293	LOW_EXPR	LOW_EXPR	LOW_EXPR	LOW_EXPR	-0.195144	LOW_EXPR	LOW_EXPR	-0.279297	-0.735928	LOW_EXPR	0.391	LOW_EXPR	LOW_EXPR	-1.14458	LOW_EXPR	-0.804003	-0.338709	-0.381302	-0.759555	-0.740835	-0.285532	-0.746723	-0.774179	LOW_EXPR	LOW_EXPR	LOW_EXPR	LOW_EXPR	0.116914	LOW_EXPR	LOW_EXPR	-0.414669	-0.905654	LOW_EXPR	0.197758	-0.303247	-0.153658	-0.933889	LOW_EXPR
16	IGF1	-1.0119	0.543532	0.0589084	0.376879	-0.199587	-0.17811	0.0833734	-0.011447	-0.41315	-0.49879	0.000384298	-0.551183	-0.288383	-0.167339	-0.184132	0.663902	-0.633498	-0.34674	0.195761	0.233977	-0.379318	-0.185973	LOW_EXPR	-0.958229	0.708397	-0.0152994	0.425466	-0.186571	0.264563	0.0579873	-0.0427453	-0.437351	0.136062	-0.38929	-0.204483	-0.513944	-0.0852344	-0.223756	0.452655	-0.407967	-0.304865	0.142792	0.0564762	-0.591102	0.243037	LOW_EXPR
17	HBA2	-0.862758	0.615063	-0.115776	-0.207376	-0.0244471	-0.352021	-0.173031	-0.271178	-0.609551	0.0328303	-0.111661	-1.34712	-1.31623	-1.08644	-0.394932	-0.512557	0.125608	-0.0326697	0.154953	0.182722	-0.338972	-0.249776	-0.0992874	-0.869038	0.294064	-0.301854	0.0954102	0.137293	-0.406644	0.10782	0.0396176	-0.645046	-0.506314	-0.139223	-0.610172	-2.2424	-0.809102	0.306212	0.527538	-0.0794974	-0.196433	-1.29766	0.0196295	-0.688853	-0.300705	-0.245852
18	FLT1	-0.816249	0.139505	0.26581	0.0925255	0.153123	0.185084	0.137579	0.522051	-0.0708501	0.0239959	0.0979713	-0.0196483	-0.35178	-0.030139	0.329326	0.180458	0.242447	-0.164012	0.30694	0.26082	0.106228	0.153458	0.0365186	-0.404212	-0.0633766	0.257291	0.395998	0.493263	0.0820322	0.0800328	0.353242	-0.0347997	0.192832	0.0800418	0.0571724	-0.22919	-0.120456	0.72441	0.269569	0.270667	-0.0908186	0.0739022	0.200052	0.0515374	0.30622	-0.477492
19	UPB1	-0.704062	LOW_EXPR	-0.0335048	-0.0050117	LOW_EXPR	0.300383	LOW_EXPR	-0.0680841	-0.539594	LOW_EXPR	LOW_EXPR	-0.376647	-0.384955	LOW_EXPR	0.00547257	LOW_EXPR	-0.30043	LOW_EXPR	0.0182185	LOW_EXPR	LOW_EXPR	LOW_EXPR	0.325797	-0.47539	LOW_EXPR	-0.0889248	-0.0403713	-0.0306791	-0.164026	0.329714	-0.171075	-0.0523684	LOW_EXPR	-0.0658136	-0.044157	-0.310162	0.0227279	-0.0508032	LOW_EXPR	-0.418938	LOW_EXPR	-0.180344	-0.189124	LOW_EXPR	-0.171456	0.161919
20	WISP2	-0.648039	-0.0355194	-0.0773536	0.0859859	-0.285654	0.221796	0.187711	-0.0685176	-0.324804	-1.1518	-0.243211	-0.0458382	0.0477398	0.211859	0.186291	-0.441277	0.126582	-0.105129	0.350761	0.242518	-0.0629696	-0.611889	LOW_EXPR	-0.535081	0.420329	-0.224353	-0.0742071	-0.12507	-0.27061	0.0905751	0.243626	0.120056	-0.860944	-0.0649087	-0.26316	-0.193973	0.0141987	-0.170752	-0.470868	-0.342005	0.000638267	0.457952	0.752003	0.0221594	-0.542249	LOW_EXPR
21	OOEP	-0.593864	LOW_EXPR	LOW_EXPR	LOW_EXPR	LOW_EXPR	LOW_EXPR	LOW_EXPR	LOW_EXPR	LOW_EXPR	-0.814755	LOW_EXPR	LOW_EXPR	LOW_EXPR	LOW_EXPR	LOW_EXPR	LOW_EXPR	LOW_EXPR	-1.33623	-1.14839	-0.626915	LOW_EXPR	LOW_EXPR	LOW_EXPR	-0.501174	-0.107651	LOW_EXPR	LOW_EXPR	LOW_EXPR	LOW_EXPR	LOW_EXPR	LOW_EXPR	LOW_EXPR	-0.640654	LOW_EXPR	-0.461283	-0.976459	-0.64914	-2.00328	-1.51355	LOW_EXPR	-1.12341	-0.43431	-0.7027	-0.982817	-0.922613	LOW_EXPR
22	ADA	-0.593201	0.0737079	-0.21608	-0.322404	0.0730484	-0.0300381	-0.339678	-0.0863057	-0.0752051	-0.10899	-0.0276885	-0.623676	0.0665057	-0.0792659	0.0405519	-0.233588	-0.292609	-0.119771	-0.105343	-0.0877898	-0.112	-0.393372	-0.203916	-0.629401	-0.0120445	-0.118239	-0.428306	0.20734	-0.250847	-0.312377	-0.120442	-0.252001	-0.0847344	-0.0340883	-0.134043	-0.395866	-0.202089	0.120255	-0.141099	-0.210882	-0.167989	-0.190129	-0.0462418	-0.0343528	-0.515714	-0.00881323
23	HP	-0.580451	-0.375252	0.0529536	-0.813439	0.277389	0.0310258	0.0984018	0.0114609	0.396506	0.240871	0.0215262	1.68424	-0.16247	0.210532	-0.152901	-0.28275	0.248765	0.305799	-0.296972	0.498407	0.0220887	0.11478	0.15332	-0.916444	-0.0222092	-0.219339	-0.209733	-0.280029	-0.355382	-0.404617	-0.50421	0.46955	0.209887	0.263003	0.682264	0.494921	0.084666	-0.145975	0.276279	0.687454	0.566431	-0.0460037	0.446683	-0.136979	-0.320595	0.040111
24	NTRK1	-0.57703	-0.513605	-0.0466358	0.114401	-0.160841	-0.102303	0.254952	0.312929	-0.342465	-0.178222	-0.211491	-0.877012	-0.332867	-0.215666	LOW_EXPR	0.327851	-0.434151	-0.519159	-0.15355	LOW_EXPR	-0.161732	-0.466923	LOW_EXPR	-0.612369	-0.445716	-0.0540725	-0.0776915	0.0696064	-0.186047	-0.648885	0.336835	-0.592373	-0.00899006	-0.373379	-0.600001	-1.00031	-0.0484181	0.274075	-0.349992	-0.320645	-0.315718	-0.195246	LOW_EXPR	0.00783078	-0.588958	-0.388425
25	DDX43	-0.559391	-0.797321	-0.456352	-0.801433	LOW_EXPR	-0.587588	-0.866346	-0.0915231	-1.20539	-0.694467	LOW_EXPR	-0.827683	-0.964933	-1.04213	-1.31441	-0.813549	-0.691944	-1.28685	-0.862284	-0.757393	-0.911308	-0.849115	LOW_EXPR	-0.480476	-0.533732	-0.426953	-0.799393	-0.42408	-0.412446	-0.819455	-0.0237101	-1.29744	-0.573121	-0.745492	-0.730946	-0.62949	-0.823968	-1.15097	-0.768762	-0.511095	-0.812042	-0.765352	-0.509347	-1.0253	-0.785777	-0.405929
26	COMP	-0.53679	0.697207	LOW_EXPR	0.665156	LOW_EXPR	LOW_EXPR	LOW_EXPR	LOW_EXPR	-0.40429	-0.462279	0.245497	-0.868717	-0.571978	0.0570977	LOW_EXPR	LOW_EXPR	LOW_EXPR	0.104347	0.620569	-0.402294	-0.372568	-0.222198	LOW_EXPR	-0.854317	0.618449	-0.434889	0.675095	LOW_EXPR	0.14332	LOW_EXPR	LOW_EXPR	-1.35663	-0.491075	1.31861	-0.75844	-0.431418	0.604515	0.609994	-0.971488	-0.287085	0.233938	0.1609	0.0413029	-0.120838	-0.293911	LOW_EXPR
27	MMEL1	-0.52745	0.116158	0.367666	LOW_EXPR	LOW_EXPR	0.316119	-0.203581	-0.027374	LOW_EXPR	LOW_EXPR	LOW_EXPR	-0.345797	0.414664	-0.147056	LOW_EXPR	-0.435493	LOW_EXPR	LOW_EXPR	-0.173677	LOW_EXPR	-0.444557	-0.203738	LOW_EXPR	-0.316938	-0.316407	-0.27153	LOW_EXPR	0.22244	-0.0695363	-0.0438919	-0.102138	LOW_EXPR	LOW_EXPR	LOW_EXPR	-0.424205	0.18176	-0.301968	LOW_EXPR	-0.423582	LOW_EXPR	LOW_EXPR	-0.438316	-0.108164	-0.141431	-0.241433	LOW_EXPR
28	ARTN	-0.525713	-0.348783	-0.035232	-0.150062	-0.435946	-0.484308	-0.240338	-0.285071	-0.73826	-0.120131	LOW_EXPR	-0.746115	-0.0880108	-0.40033	LOW_EXPR	-0.40286	0.0192455	-0.188295	0.0868253	-0.135248	-0.345187	-0.565928	LOW_EXPR	-0.430755	-0.608466	-0.206429	-0.192117	-0.0398939	-0.0571354	-0.384359	-0.160601	-0.44782	-0.139992	0.166618	-0.488835	-0.744488	-0.407749	-0.196846	-0.340431	-0.146997	-0.237744	-0.0675479	-0.312502	0.015898	-0.78373	LOW_EXPR
29	PPP2R3B	-0.520708	-0.340251	-0.300335	-0.439405	-0.474944	-0.572361	-0.408628	-0.42983	-0.182899	0.00462879	-0.223384	-0.270151	-0.00656738	-0.115817	0.0973584	-0.134382	-0.353784	-0.30926	-0.207112	-0.190835	-0.0860902	-0.253995	0.0230164	-0.35371	-0.204966	-0.304433	-0.408285	-0.374745	-0.66682	-0.318236	-0.449845	-0.261108	-0.131767	-0.197887	-0.220687	-0.169042	-0.0959705	-0.0120864	-0.288803	-0.244871	-0.251589	-0.284399	0.012249	-0.127318	-0.300594	-0.0670434
30	WDR62	-0.487026	-0.122678	-0.158158	-0.140277	-0.220761	-0.129729	-0.00864551	0.0875465	-0.220657	0.22624	-0.634947	0.0538673	0.215155	0.00352254	-0.166182	0.0218178	0.110522	LOW_EXPR	0.234981	-0.189187	0.177822	0.0188962	0.065323	-0.540173	-0.00681119	-0.265886	-0.108161	-0.105613	-0.271276	-0.0741039	0.100249	-0.338926	0.14131	-1.47458	-0.118752	0.104604	0.0723748	-0.0402853	-0.0868569	0.235308	LOW_EXPR	0.238766	-0.173107	0.0527304	-0.0426362	-0.00777559
31	MKX	-0.472621	-0.357023	-0.0375896	0.349867	0.031391	-0.55932	0.206363	0.143447	LOW_EXPR	0.356539	LOW_EXPR	0.155607	0.0231181	-0.0162446	0.22304	-0.030465	-0.011216	LOW_EXPR	LOW_EXPR	0.499148	0.153015	-0.530736	LOW_EXPR	-0.330824	-0.186303	-0.090389	0.280485	0.0255363	-0.107403	0.327483	0.288454	LOW_EXPR	0.368935	LOW_EXPR	0.0151316	-0.70214	-0.15262	0.0495875	-0.0757024	0.182836	LOW_EXPR	LOW_EXPR	0.165578	0.29505	-0.455791	LOW_EXPR
32	DMRTC1B	-0.441298	LOW_EXPR	LOW_EXPR	-0.0361594	LOW_EXPR	LOW_EXPR	-0.0701767	LOW_EXPR	LOW_EXPR	LOW_EXPR	LOW_EXPR	LOW_EXPR	LOW_EXPR	LOW_EXPR	LOW_EXPR	LOW_EXPR	-0.113445	LOW_EXPR	LOW_EXPR	LOW_EXPR	LOW_EXPR	LOW_EXPR	LOW_EXPR	-0.4832	LOW_EXPR	LOW_EXPR	0.0648931	LOW_EXPR	LOW_EXPR	-0.0834122	0.251043	LOW_EXPR	LOW_EXPR	LOW_EXPR	LOW_EXPR	LOW_EXPR	LOW_EXPR	LOW_EXPR	LOW_EXPR	0.182971	LOW_EXPR	LOW_EXPR	LOW_EXPR	LOW_EXPR	LOW_EXPR	LOW_EXPR
33	CAMK1G	-0.441091	0.83854	-0.0681723	-0.0874441	0.00349048	-0.359301	0.0640321	-0.25356	LOW_EXPR	LOW_EXPR	LOW_EXPR	-0.66415	-0.25211	-0.373502	LOW_EXPR	0.102313	-0.151508	LOW_EXPR	-0.512917	LOW_EXPR	LOW_EXPR	LOW_EXPR	LOW_EXPR	-0.476287	-0.165347	0.217168	-0.152699	0.0991586	-0.239701	-0.13598	0.184327	LOW_EXPR	LOW_EXPR	LOW_EXPR	-0.512939	-0.766027	-0.21464	0.137576	-0.227935	-0.0103173	LOW_EXPR	-0.261633	-0.117546	LOW_EXPR	LOW_EXPR	LOW_EXPR
34	EFCAB5	-0.423941	LOW_EXPR	0.0922353	0.0150873	0.03827	-0.0392952	-0.0301553	0.0353269	LOW_EXPR	LOW_EXPR	LOW_EXPR	LOW_EXPR	LOW_EXPR	LOW_EXPR	LOW_EXPR	LOW_EXPR	LOW_EXPR	LOW_EXPR	LOW_EXPR	LOW_EXPR	LOW_EXPR	LOW_EXPR	LOW_EXPR	-0.309738	0.0634436	-0.0521961	0.0783994	0.176328	-0.117646	-0.0637916	-0.0358262	LOW_EXPR	LOW_EXPR	LOW_EXPR	LOW_EXPR	0.134158	LOW_EXPR	LOW_EXPR	LOW_EXPR	LOW_EXPR	LOW_EXPR	LOW_EXPR	LOW_EXPR	LOW_EXPR	LOW_EXPR	LOW_EXPR
35	AGAP2	-0.421157	-0.0328616	-0.0977554	-0.249867	-0.350335	-0.161043	-0.115066	-0.351401	-0.25073	-0.203974	0.128112	-0.277425	0.475539	-0.232447	0.268409	-0.0189324	0.455405	-0.291454	-0.00678624	-0.262982	0.0462379	-0.347016	0.0816579	-0.453541	0.266918	-0.0386671	-0.164613	-0.116913	-0.508133	-0.0818748	-0.265085	-0.328309	-0.380111	-0.0295275	-0.058792	-0.0178516	-0.0228922	0.342754	0.167713	0.3884	-0.295068	-0.10805	-0.198432	-0.0856039	-0.222767	-0.0645775
36	TP53INP2	-0.409304	0.191739	-0.164023	-0.261954	-0.0850071	-0.100251	0.237739	0.0389245	-0.0951245	-0.161223	0.00327831	-0.1581	-0.0794918	-0.339433	-0.303037	0.0666534	-0.260169	-0.202633	0.232908	-0.0527611	-0.0661517	-0.158943	0.19108	-0.383679	-0.110616	-0.041143	-0.170046	-0.0872925	-0.253663	0.0800868	-0.200845	-0.11557	-0.152867	-0.0557655	-0.190742	-0.102899	-0.240909	-0.329148	0.10429	-0.366685	-0.232605	0.089784	-0.203395	0.0106214	-0.0368979	0.0281048
37	FAM228A	-0.397691	-0.114869	0.0109291	0.0201918	-0.0618805	-0.141519	-0.254221	-0.214413	-0.927832	-0.869256	LOW_EXPR	-0.670895	-0.509925	-0.721828	LOW_EXPR	-0.553419	-0.57324	LOW_EXPR	-0.0899575	-0.25553	LOW_EXPR	-0.337479	LOW_EXPR	-0.374678	-0.125148	-0.114383	-0.0365799	0.021806	-0.0191384	-0.184902	-0.210997	-0.812248	-0.612654	-0.194244	-0.738277	-0.640149	-0.292874	-0.421004	-0.695868	-0.437202	LOW_EXPR	-0.363865	-0.290993	-0.593715	-0.184353	LOW_EXPR
38	PLCXD1	-0.395976	-0.469722	-0.951027	-0.788916	-0.868475	-0.713477	-0.719639	-0.791186	-0.484888	-0.686782	-0.479146	-0.217385	0.103953	-0.791841	-0.196702	-0.467815	-0.352576	-0.471543	-0.481717	0.0690867	-0.154544	-0.101579	-0.18334	-0.363154	-0.410419	-0.834267	-0.631591	-0.876889	-0.648415	-0.648592	-0.91765	-0.487907	-0.258087	-0.39152	-0.0759583	0.211792	-0.382726	-0.217488	-0.315834	-0.442878	-0.266109	-0.33257	-0.0275485	-0.113306	0.0753941	0.00642618
39	DIO2	-0.384751	0.51676	-0.307125	0.382286	0.0312893	0.109253	-0.0929783	-0.175235	-0.658448	-0.302136	-0.396197	-1.48824	-0.349722	LOW_EXPR	LOW_EXPR	0.280028	-0.392152	LOW_EXPR	LOW_EXPR	-0.535816	-0.128937	-1.02179	LOW_EXPR	-0.424051	0.380058	-0.0512345	0.0814925	-0.388114	0.127779	-0.14643	0.00741551	-1.43437	-0.155968	-0.442521	-0.726398	-0.340609	-0.476805	LOW_EXPR	0.0875791	-0.540721	-0.574392	-0.417734	-0.14933	-0.313323	-1.05018	LOW_EXPR
40	MUSTN1	-0.382935	0.482247	0.0579348	0.192885	0.0535818	0.105069	0.250975	0.00105064	-0.066914	0.0200576	-0.53155	-0.358313	0.17788	0.177666	0.335469	0.170123	0.161684	-0.104109	0.099268	-0.145551	-0.0391767	-0.661304	0.0746025	-0.375197	-0.00495833	-0.0540655	0.178735	0.0906938	0.0326804	0.120047	-0.0743156	-0.142561	0.0806735	-0.387791	-0.26971	-0.0813005	-0.145481	0.352977	0.013518	-0.0378555	-0.341669	0.0057833	-0.00710449	0.00571933	-1.04627	0.15827
41	FRG1B	-0.381731	-0.428549	-0.584	-0.800013	-0.978248	-0.680102	-0.345149	-0.767583	-0.398713	-0.485642	-0.474526	-0.49629	-0.558439	-0.484027	-0.23633	-0.389623	-0.342472	-0.447433	-0.248668	-0.527571	-0.54758	-0.479652	-0.47552	-0.374094	-0.314363	-0.543366	-0.713359	-0.933454	-0.684058	-0.459836	-0.554157	-0.364296	-0.339038	-0.407312	-0.337241	-0.360785	-0.49214	-0.311021	-0.315289	-0.275583	-0.229247	-0.0299978	-0.505783	-0.498826	-0.397085	-0.524953
42	ANKFN1	-0.377382	0.440553	-0.0401046	LOW_EXPR	-0.418766	0.143835	0.143686	0.179476	LOW_EXPR	LOW_EXPR	LOW_EXPR	0.606825	LOW_EXPR	LOW_EXPR	LOW_EXPR	LOW_EXPR	LOW_EXPR	LOW_EXPR	LOW_EXPR	-0.0322993	LOW_EXPR	-0.515575	LOW_EXPR	-0.311103	0.205915	0.290819	0.429235	-0.247083	-0.377775	-0.0538862	0.367798	LOW_EXPR	LOW_EXPR	LOW_EXPR	0.24901	LOW_EXPR	LOW_EXPR	LOW_EXPR	LOW_EXPR	-0.481952	LOW_EXPR	LOW_EXPR	-0.0874041	LOW_EXPR	-0.650997	LOW_EXPR
43	VWA3B	-0.377152	0.166434	0.211695	LOW_EXPR	LOW_EXPR	0.156937	-0.249846	0.2825	LOW_EXPR	LOW_EXPR	LOW_EXPR	0.709073	LOW_EXPR	LOW_EXPR	LOW_EXPR	LOW_EXPR	0.26092	LOW_EXPR	LOW_EXPR	LOW_EXPR	LOW_EXPR	LOW_EXPR	LOW_EXPR	-0.308246	0.0759564	0.364764	LOW_EXPR	LOW_EXPR	-0.664979	0.655303	0.6083	LOW_EXPR	LOW_EXPR	LOW_EXPR	0.416901	LOW_EXPR	LOW_EXPR	LOW_EXPR	LOW_EXPR	0.110619	LOW_EXPR	LOW_EXPR	LOW_EXPR	LOW_EXPR	LOW_EXPR	LOW_EXPR
44	FABP7	-0.371993	0.175529	0.0492872	0.0761443	0.133638	-0.136174	0.173062	0.206881	LOW_EXPR	LOW_EXPR	0.939672	LOW_EXPR	LOW_EXPR	LOW_EXPR	LOW_EXPR	LOW_EXPR	0.192059	LOW_EXPR	LOW_EXPR	-0.0398764	LOW_EXPR	LOW_EXPR	LOW_EXPR	-0.485505	0.0863745	-0.0921028	0.0530985	0.111429	0.196371	-0.241279	-0.00109736	LOW_EXPR	LOW_EXPR	0.503159	LOW_EXPR	LOW_EXPR	LOW_EXPR	LOW_EXPR	LOW_EXPR	-0.0921416	LOW_EXPR	LOW_EXPR	0.510516	LOW_EXPR	LOW_EXPR	LOW_EXPR
45	TANGO6	-0.366769	0.0440138	-0.0517067	0.0134707	0.0352559	0.0878412	0.0386512	0.0625827	-0.0326911	0.00926101	0.292489	0.0611805	-0.0653759	0.0944483	0.00942872	0.0632615	-0.0247843	-0.175248	0.0839353	-0.0838293	0.0193406	-0.0966457	0.177631	-0.281183	0.100152	0.00674151	0.104793	0.114578	0.0212543	0.0137278	0.0234319	-0.0988663	0.0689656	0.0615323	-0.013455	-0.105305	0.0780205	-0.0414901	0.0428028	-0.065592	-0.197073	0.0251259	-0.0627548	-0.0147256	-0.0609075	-0.0315032
46	SV2A	-0.364302	-0.0844525	0.113023	-0.10796	0.0831864	-0.578146	0.120834	-0.028644	-0.344213	-0.0373666	0.297636	-0.537975	-0.315538	-0.094598	0.279153	-0.339221	0.0582958	-0.49575	-0.0832597	-0.120784	0.0123242	-0.811187	-0.0444741	-0.240469	0.316542	-0.00616525	-0.11229	0.00878488	-0.125853	-0.0952928	0.0379795	-0.449791	-0.110737	0.185184	-0.30835	-0.447568	-0.163879	0.125217	-0.330209	0.132345	-0.403111	-0.0863621	-0.113612	-0.0664419	-0.781955	-0.239654
47	LUM	-0.358411	0.321936	-0.0240293	0.135436	-0.0464319	-0.0506215	0.215496	-0.103967	-0.44352	-0.361329	-0.399393	-1.0789	-0.432236	-0.367687	0.0786016	0.164267	-1.19963	-0.343139	0.173378	0.019476	-0.0168136	-0.282486	LOW_EXPR	-0.359959	0.0188484	-0.0108662	0.0474967	0.388228	-0.0598529	0.14607	0.0357769	-0.681649	-0.105809	-0.305508	-0.300869	-0.632374	-0.467108	0.476109	0.201153	-0.978486	-0.408967	-0.0362239	0.140216	-0.123946	-0.346982	-0.00336551
48	RAP1GAP2	-0.357312	0.414055	-0.180792	-0.0950893	0.0738217	-0.415418	0.133286	0.0385959	-0.117422	-0.11788	0.280238	-0.016519	0.263634	0.0299085	0.467699	-0.119945	-0.112125	0.0165571	0.00923515	-0.0281601	0.0741365	-0.123248	0.170176	-0.307498	0.166435	0.108375	-0.116357	-0.0353609	-0.255178	-0.15599	-0.109253	0.00667473	-0.110684	0.3789	-0.03398	0.275364	0.0187828	0.381901	0.103123	-0.251827	-0.0749223	-0.190459	0.188532	0.0171578	0.0065295	-0.0952744
49	NRGN	-0.354694	0.540033	0.0161726	0.0767795	-0.124955	-0.394094	-0.00314857	-0.719988	-0.0879536	0.467626	0.0475855	0.666231	-0.078389	-0.0681139	0.115786	-0.0509419	0.293635	-0.365288	-0.429642	-0.293794	-0.201007	-0.397695	0.0911789	-0.280416	-0.0329101	-0.166258	0.0448384	-0.0934611	-0.128859	-0.0674312	-0.224299	-0.223154	0.23487	-0.113796	0.196071	-0.411893	-0.31787	-0.00663484	0.255673	0.741068	-0.282026	-0.616897	-0.201175	0.0353717	-0.253094	0.148937
50	GREB1L	-0.345036	0.0341241	0.18337	0.29238	0.0385049	-0.337391	-0.1779	-0.0415754	-0.198668	-0.164323	-0.0614982	-0.237092	-0.0141442	0.116575	0.0693733	-0.282765	-0.75057	LOW_EXPR	LOW_EXPR	-0.049046	LOW_EXPR	-1.37567	LOW_EXPR	-0.335299	0.0760012	0.0843861	0.345038	0.186717	-0.332189	-0.0502179	0.0707748	-0.15098	-0.254135	-0.159791	-0.0713305	0.242551	0.0726515	0.136258	-0.0250747	-0.728164	LOW_EXPR	LOW_EXPR	0.628734	LOW_EXPR	-1.36718	LOW_EXPR
51	COL4A6	-0.339095	LOW_EXPR	0.10497	LOW_EXPR	LOW_EXPR	LOW_EXPR	0.741534	0.359401	-0.243828	0.131545	0.0595738	-0.198919	-0.0429532	0.213451	LOW_EXPR	0.113083	-0.0664197	LOW_EXPR	-0.122416	0.0320335	0.0940013	-1.08692	LOW_EXPR	-0.283285	0.308775	0.43095	LOW_EXPR	LOW_EXPR	-0.513224	0.3788	0.145952	-0.173414	0.417955	0.0198977	-0.0260268	-0.238197	0.00318753	LOW_EXPR	-0.384212	-0.118257	LOW_EXPR	-0.388662	0.0887238	0.15676	-0.881163	LOW_EXPR
52	SHC3	-0.339002	-0.0782767	-0.229286	-0.162303	-0.305214	-0.348392	-0.114217	-0.494591	LOW_EXPR	-0.0876369	LOW_EXPR	0.702068	-0.264662	0.0537412	LOW_EXPR	-0.0643263	-0.470381	0.160312	LOW_EXPR	-0.0490167	0.0781265	-0.865552	LOW_EXPR	-0.380617	-0.151633	0.158739	0.0799099	-0.40199	0.0437009	-0.381693	-0.463527	-0.0461704	0.205801	LOW_EXPR	0.0802409	-0.359223	-0.0195062	LOW_EXPR	-0.0639587	-0.582387	0.0564481	LOW_EXPR	-0.167437	-0.147033	-0.762436	LOW_EXPR
53	PTGFR	-0.338843	0.136845	0.137104	LOW_EXPR	0.0695307	0.28878	-0.838743	0.0711224	-0.393955	0.358702	-0.37017	0.172441	-0.314298	-0.0444245	-0.489886	-0.178809	LOW_EXPR	-0.292401	0.241748	0.414451	-0.411553	0.0533172	LOW_EXPR	-0.444047	-0.283295	-0.214958	LOW_EXPR	0.0349718	0.213322	0.195895	0.165412	-0.408166	0.0303727	0.10218	0.0682652	-0.431903	-0.100782	-0.172858	-0.256336	-0.432122	-0.257059	0.0449278	0.41838	-0.0779513	-0.168099	LOW_EXPR
54	KCND3	-0.337779	0.103176	0.0501364	-0.0657419	0.103275	-0.0805405	0.0334266	-0.0506426	0.0489752	0.144814	-0.0250807	-0.0379187	-0.744592	-0.0947125	-0.130672	0.271483	-0.419265	-0.170454	-0.0870791	0.00929803	-0.115321	-0.046263	LOW_EXPR	-0.541512	0.328354	0.117162	-0.0423724	0.0113869	-0.0714702	0.122225	-0.000837182	-0.0962278	0.195743	-0.268415	-0.0905625	-0.502472	-0.131923	-0.164687	0.224952	-0.44824	-0.050506	0.0636435	-0.108851	-0.163751	-0.271435	LOW_EXPR
55	ICAM5	-0.337262	LOW_EXPR	0.00411037	LOW_EXPR	-0.116948	-0.357968	0.0659624	-0.126518	-0.351451	-0.300748	LOW_EXPR	-0.124451	-0.238606	-0.025884	LOW_EXPR	-0.0647879	-0.558428	LOW_EXPR	-0.221645	0.167006	0.0100801	-0.0474437	-0.2204	-0.484643	0.830621	0.068382	LOW_EXPR	0.0666761	-0.241706	-0.217469	0.014162	-0.168783	-0.184352	LOW_EXPR	-0.10626	-0.0631157	-0.0921537	0.207068	-0.0612446	-0.598213	LOW_EXPR	-0.00338204	0.0614302	-0.0588969	-0.213564	-0.139348
56	KLK4	-0.333525	LOW_EXPR	LOW_EXPR	0.0899626	LOW_EXPR	LOW_EXPR	0.466001	LOW_EXPR	LOW_EXPR	LOW_EXPR	LOW_EXPR	LOW_EXPR	1.2296	LOW_EXPR	LOW_EXPR	0.593949	LOW_EXPR	LOW_EXPR	LOW_EXPR	-0.538065	LOW_EXPR	LOW_EXPR	LOW_EXPR	-0.421341	0.524645	LOW_EXPR	-0.0608561	LOW_EXPR	-0.81302	0.0959863	LOW_EXPR	LOW_EXPR	LOW_EXPR	LOW_EXPR	LOW_EXPR	0.236121	-1.07274	LOW_EXPR	0.121114	LOW_EXPR	LOW_EXPR	LOW_EXPR	-0.309578	LOW_EXPR	-0.0521871	LOW_EXPR
57	CA8	-0.32474	0.391821	0.163546	0.308774	0.0169379	-0.106504	0.173918	0.251534	-0.43581	LOW_EXPR	-0.126397	0.681147	-0.198792	-0.430285	LOW_EXPR	-0.0257654	-0.492028	0.0903196	0.263215	-0.01403	LOW_EXPR	0.124213	LOW_EXPR	-0.272285	0.348894	0.177581	0.280206	-0.0186525	0.153479	-0.134372	0.0988134	-0.172965	-0.170792	0.0614101	0.138191	-0.0910886	-0.299402	LOW_EXPR	-0.598489	-0.345674	0.0962874	-0.025592	-0.0851781	-0.202138	-0.0345563	LOW_EXPR
58	MED13	-0.323394	-0.00652834	0.0850759	0.126911	0.0141931	0.23748	-0.0420472	0.0879427	0.103819	-0.0417152	0.183365	-0.273766	0.120854	0.0899496	0.17215	0.0618288	0.0326833	-0.102016	0.232983	0.127669	0.00171186	0.00493039	0.162854	-0.270345	0.128387	-0.000115637	0.0957046	0.0855898	0.0687998	-0.0644126	-0.0769693	-0.0994676	-0.102478	0.153213	-0.0957033	0.0522041	0.00544608	0.178113	-0.0528068	-0.00319389	-0.0412367	0.211117	0.0935685	-0.0313498	0.0321476	0.0442776
59	RNF165	-0.31977	0.293038	0.366723	0.0301347	0.0627647	-0.134818	-0.0110595	0.0378852	-0.0818214	LOW_EXPR	LOW_EXPR	-0.615984	LOW_EXPR	-0.280781	0.0975995	LOW_EXPR	0.0170524	LOW_EXPR	-0.104646	0.0572019	0.00448639	-0.43476	0.169082	-0.411513	0.386379	0.111804	0.0458238	0.09819	-0.102071	-0.0356277	0.0281891	0.0376414	-0.265439	-0.547677	-0.298398	-0.939358	-0.326511	-0.0520695	-0.362618	0.00390082	LOW_EXPR	0.169766	0.0653272	-0.0266611	-0.183286	0.0316883
60	FAM20A	-0.317996	0.283128	-0.0947338	0.071459	-0.0874706	0.16259	-0.521629	0.192989	-0.0217303	-0.341973	-0.142201	0.387011	-0.484586	-0.0849141	0.100756	-0.112497	-0.617233	-0.682092	-0.45096	-0.203677	-0.234784	-0.425947	0.400122	-0.407816	-0.186891	0.248158	0.625871	-0.125433	0.32302	-0.166518	0.34266	-0.182818	0.0290952	-0.137137	0.175289	-0.360121	-0.0828479	0.0436524	-0.0501006	-0.622584	-0.715461	-0.226581	-0.050182	-0.411668	-0.396284	-0.00758143
61	C10orf67	-0.312706	0.256794	0.00157065	LOW_EXPR	-0.266553	0.0998154	-0.174713	0.0195448	-0.344055	LOW_EXPR	LOW_EXPR	0.34582	LOW_EXPR	LOW_EXPR	LOW_EXPR	LOW_EXPR	0.223247	LOW_EXPR	LOW_EXPR	0.235025	LOW_EXPR	LOW_EXPR	LOW_EXPR	-0.272814	0.288845	-0.173159	LOW_EXPR	-0.282308	-0.189503	-0.316571	0.0450209	-0.46794	LOW_EXPR	LOW_EXPR	0.0300013	LOW_EXPR	LOW_EXPR	LOW_EXPR	LOW_EXPR	0.0472123	LOW_EXPR	LOW_EXPR	0.0387849	LOW_EXPR	LOW_EXPR	LOW_EXPR
62	RARRES1	-0.307264	-0.0182676	-0.000911043	0.121527	-0.217108	0.118669	-0.121651	0.122708	-0.320045	0.255631	0.344478	-0.231857	-0.325273	-0.164241	-0.0305019	-0.205748	-0.393789	-1.1777	-0.166918	0.175299	0.295884	0.254302	LOW_EXPR	-0.644753	0.350666	-0.176888	0.0209019	-0.15373	-0.0805057	-0.0501719	0.169088	0.446286	0.0949766	0.44438	0.151094	-0.686248	-0.235204	0.00234117	-0.305294	-0.388435	-0.430041	-0.398454	0.0861993	0.21239	0.345385	LOW_EXPR
63	DYNC1I1	-0.306326	0.0335151	0.0468928	-0.0363674	0.177602	-0.0364961	0.288501	0.125787	-0.168921	-0.202793	-0.251122	0.0427227	-0.0392999	0.165743	LOW_EXPR	0.0855824	0.147542	-0.10891	0.0996693	-0.0264654	0.183322	-0.400908	LOW_EXPR	-0.324919	-0.189279	-0.214963	0.0471493	-0.053401	0.0574204	0.0757344	0.00240285	-0.135474	-0.201493	-0.143375	-0.0524687	-0.936929	0.268725	LOW_EXPR	0.175194	0.173366	-0.211811	0.103754	0.0114554	0.0608902	-0.584533	LOW_EXPR
64	WWC3	-0.306148	0.0196924	-0.0361041	-0.095972	0.141427	0.168946	-0.0371768	0.12626	-0.0055983	0.0152068	-0.134604	0.299163	0.0581495	0.0293208	0.361074	-0.00980196	-0.0278574	-0.124292	0.174412	-0.00391538	-0.0106888	-0.0790104	0.33606	-0.35951	0.162376	-0.149878	-0.00480957	0.0313457	0.0424737	0.216332	0.134059	0.00641827	-0.0415636	-0.164312	0.0863332	0.00237481	0.0518378	0.296003	0.0433021	-0.0398397	-0.0395674	0.0794947	0.0250126	0.0230471	-0.0745862	0.162409
65	PDE4C	-0.301899	0.160792	-0.283065	-0.24417	-0.128652	-0.421099	-0.0863192	-0.114469	-0.276853	0.157497	0.0505828	0.412053	-0.519142	-0.135008	-0.139351	0.0167947	0.349788	LOW_EXPR	0.0957969	LOW_EXPR	-0.129876	-0.64971	LOW_EXPR	-0.397197	-0.0321721	-0.249183	0.0276376	-0.190978	-0.272219	-0.0358471	0.0883014	-0.0969446	0.233269	-0.241287	0.161766	-0.794058	-0.159487	-0.288707	0.0850717	0.53715	0.0105639	-0.0555511	-0.0161851	0.0759912	-0.64529	LOW_EXPR
66	C1orf101	-0.298616	-0.0503909	0.192642	-0.013702	0.0844762	0.00220099	0.0930412	0.214635	LOW_EXPR	0.139914	-0.138201	-0.000743763	0.128996	0.160861	0.161962	0.0445557	-0.0420732	LOW_EXPR	0.17724	0.0315574	-0.00354949	-0.094879	LOW_EXPR	-0.310163	0.0257485	0.198857	0.0541519	-0.0765451	-0.0647021	0.158331	0.162577	LOW_EXPR	0.124058	-0.150527	0.124482	0.16011	0.0920848	-0.0778963	-0.186985	-0.0386679	-0.54262	0.276742	-0.0985569	-0.0296389	-0.0242553	LOW_EXPR
67	NUDT4	-0.288511	0.116291	-0.0613779	0.0800806	0.19961	0.0503389	0.101478	-0.115389	0.0492749	-0.0887505	0.35935	-0.0752068	-0.00286743	-0.0969553	0.230255	0.177154	-0.24813	-0.381599	0.188209	0.081963	0.0427416	-0.0866022	0.118902	-0.357264	-0.106727	-0.0335063	0.256292	0.0973671	0.0209181	-0.0947308	-0.0426675	0.0803641	-0.138133	0.115774	0.0410437	-0.164457	0.00344843	0.205218	0.0198633	-0.175189	-0.262592	0.0884346	0.00229917	0.102815	-0.132136	0.117881
68	TPPP2	-0.285229	LOW_EXPR	-0.138522	LOW_EXPR	LOW_EXPR	0.339772	LOW_EXPR	0.199953	0.0573164	LOW_EXPR	0.0410026	LOW_EXPR	LOW_EXPR	LOW_EXPR	0.302566	-0.365601	LOW_EXPR	LOW_EXPR	LOW_EXPR	LOW_EXPR	LOW_EXPR	LOW_EXPR	LOW_EXPR	-0.353538	LOW_EXPR	0.185404	LOW_EXPR	0.341362	0.25252	0.372152	0.581817	-0.0303449	LOW_EXPR	0.106338	LOW_EXPR	LOW_EXPR	LOW_EXPR	0.0367987	-0.103684	LOW_EXPR	LOW_EXPR	0.323302	LOW_EXPR	LOW_EXPR	LOW_EXPR	LOW_EXPR
69	C4B	-0.270583	0.211163	0.418424	0.382161	0.23283	0.845922	-0.0934332	0.453379	-0.0377166	0.554789	LOW_EXPR	0.502283	-0.193426	0.362934	0.177115	-0.325805	-0.326776	-0.764632	-0.139306	0.175103	0.172638	-0.430401	LOW_EXPR	-0.413855	-0.120412	0.444466	0.789552	0.559095	-0.063741	0.0727583	0.584012	0.191134	-0.0224311	LOW_EXPR	0.184227	-0.252499	0.155333	-0.102023	-0.15967	-0.0420213	-0.595699	-0.105579	0.134261	0.226124	-0.297307	LOW_EXPR
70	LZTS1	-0.268816	0.00140866	-0.0460477	0.0439201	-0.0896598	-0.279914	0.282008	-0.117512	-0.105209	-0.247465	0.0169645	-0.415523	-0.143882	-0.1316	0.141878	-0.124598	-0.160247	-0.480989	-0.632555	-0.37926	-0.118662	-0.399795	LOW_EXPR	-0.323967	0.144933	0.0472316	0.0239091	0.0385955	-0.339974	0.220766	0.0212441	-0.187989	-0.173539	-0.0491593	-0.331821	-0.188833	-0.153819	0.140956	0.167682	0.0707782	-0.359456	-0.487084	-0.566645	0.119509	-0.343329	LOW_EXPR
71	ATAD3C	-0.265176	0.0396398	-0.309441	-0.0855021	0.211334	0.346148	0.14958	-0.152243	-0.0691092	-0.314455	LOW_EXPR	0.408869	-0.067667	-0.0474099	-0.584764	0.0835514	0.240546	0.0406183	-0.039802	-0.208586	-0.092359	-0.281706	LOW_EXPR	-0.412404	0.233867	-0.0753824	0.123353	0.190856	-0.191026	0.238926	0.124102	-0.186156	-0.396694	LOW_EXPR	0.157718	-0.503449	0.0422628	-0.549221	-0.103774	0.250594	0.0427191	-0.136359	-0.11191	0.0276266	-0.101699	LOW_EXPR
72	DHRS3	-0.256772	0.142667	-0.160563	0.283326	-0.105491	0.130291	0.134425	0.0791987	0.154098	-0.105985	-0.0189396	0.204833	0.0847534	-0.125944	0.00853318	0.00885557	-0.12584	-0.118979	0.0875936	0.111685	-0.031509	0.303015	-0.127969	-0.297896	0.134155	-0.133463	0.518321	0.106768	0.160214	0.102528	0.220188	0.116377	-0.069574	0.0613	-0.00512169	0.00268781	-0.062522	-0.0259031	0.0636379	-0.124555	-0.017275	0.206441	0.117754	-0.101424	0.38487	-0.143919
73	SCRG1	-0.255823	-0.170825	0.172105	0.286644	-0.072439	-0.0110103	-0.0412426	0.213672	-0.261434	-0.0983105	LOW_EXPR	-0.566914	-0.298037	-0.161191	LOW_EXPR	-0.39387	-0.625067	LOW_EXPR	-0.29328	-0.0594457	LOW_EXPR	-0.946215	LOW_EXPR	-0.551835	-0.0943913	0.219045	0.226823	-0.0201713	0.238473	0.161023	0.171782	-0.345546	-0.100269	LOW_EXPR	-0.537699	-1.30353	-0.0310823	LOW_EXPR	-0.444196	-0.868037	LOW_EXPR	-0.5731	-0.235122	LOW_EXPR	-0.911387	LOW_EXPR
74	ATP8A2	-0.244467	0.577795	0.0850953	-0.0227449	0.100301	-0.260351	0.367857	0.188413	LOW_EXPR	LOW_EXPR	LOW_EXPR	0.967014	-0.00257473	-0.0792704	LOW_EXPR	0.258945	0.122142	LOW_EXPR	0.15576	LOW_EXPR	LOW_EXPR	LOW_EXPR	LOW_EXPR	-0.409937	0.0491791	-0.0278182	0.0430086	0.120941	-0.207386	0.203801	0.0446767	LOW_EXPR	-0.72694	LOW_EXPR	0.0300027	-0.333013	-0.190986	LOW_EXPR	-0.111297	0.16644	LOW_EXPR	0.109804	-0.817729	LOW_EXPR	LOW_EXPR	LOW_EXPR
75	SSC5D	-0.243271	0.040098	0.100648	-0.0376976	-0.0410955	0.0391266	-0.124244	-0.0294318	0.0196544	0.329015	-0.310954	-0.556672	-0.0544848	-0.159874	0.541168	0.188336	0.244375	0.10135	-0.166522	0.0589472	0.239159	-0.23522	LOW_EXPR	-0.314633	-0.0841193	0.0556596	-0.0569107	-0.0482594	0.0381418	0.180903	-0.00445248	-0.278841	0.226001	-0.349018	-0.404155	-1.28854	-0.0289666	0.523078	0.246264	-0.0812441	-0.229037	0.176063	0.00755163	0.271082	-0.00181667	LOW_EXPR
76	SHH	-0.235703	LOW_EXPR	0.0938991	0.198526	-0.0669567	-0.402017	-0.14417	-0.0159383	LOW_EXPR	LOW_EXPR	LOW_EXPR	0.266776	0.343321	LOW_EXPR	-0.150135	-0.254986	2.6016	LOW_EXPR	LOW_EXPR	LOW_EXPR	LOW_EXPR	LOW_EXPR	LOW_EXPR	-0.386968	0.320801	0.187116	0.0426628	-0.00943174	-0.331474	-0.0546266	0.0366712	LOW_EXPR	LOW_EXPR	LOW_EXPR	0.126241	-0.289647	LOW_EXPR	0.0689456	-0.0314027	3.25289	LOW_EXPR	LOW_EXPR	LOW_EXPR	LOW_EXPR	LOW_EXPR	LOW_EXPR
77	GRIK3	-0.235435	-0.206943	0.0193536	0.102452	0.216496	-0.10613	-0.0613323	0.202332	-0.253138	LOW_EXPR	LOW_EXPR	LOW_EXPR	-0.0119923	-0.105241	LOW_EXPR	-0.265872	0.15565	LOW_EXPR	LOW_EXPR	-0.0926772	0.214613	-0.44885	LOW_EXPR	-0.493719	-0.0378564	0.0108489	0.0422043	0.213193	-0.280508	-0.0586813	0.0182527	-0.285572	LOW_EXPR	LOW_EXPR	LOW_EXPR	-0.49583	-0.158975	LOW_EXPR	-0.459131	-1.01169	LOW_EXPR	0.620382	-0.186048	-0.0714889	-0.360884	LOW_EXPR
78	CCL2	-0.220157	0.120705	-0.0601192	0.519282	0.743836	0.34846	-0.278627	0.0767013	0.155243	-0.493676	-0.576852	-0.324507	-1.28355	-0.521381	0.161137	-0.145659	-0.850813	-0.823498	-0.283307	-0.0931858	0.0175025	-0.460754	0.293869	-0.456129	-1.00919	-0.13571	0.877463	0.356071	-0.0300391	-1.05289	-0.439182	-0.445964	-0.227386	-0.222405	-0.436778	-1.49414	-0.741491	0.348772	0.113348	-0.996208	-1.11137	-0.266264	0.0965131	-0.427304	0.143395	-0.214429
79	GREB1	-0.21959	-0.0832201	-0.0594191	0.117677	-0.0187471	-0.0198918	-0.15889	0.221801	-0.0767664	-0.2751	0.110296	-0.0360514	-0.205028	-0.0735691	-0.416819	-0.246862	0.692183	-0.0211599	LOW_EXPR	-0.126473	LOW_EXPR	-0.243577	LOW_EXPR	-0.40068	-0.196306	0.0532566	0.132727	0.242912	0.036467	-0.317483	0.170122	-0.0734227	0.0475037	0.546945	-0.109389	-0.373681	0.106149	0.295746	-0.0702103	0.682874	-0.26034	LOW_EXPR	0.565222	LOW_EXPR	-0.243515	LOW_EXPR
80	ADAMTS8	-0.215733	0.0750846	-0.309031	0.213116	-0.195444	0.0409045	0.0988764	-0.626495	-0.0566236	-0.414749	0.272573	-0.485747	-0.522437	0.0123793	LOW_EXPR	0.167438	-0.235912	LOW_EXPR	-0.652608	0.0494338	0.231698	-0.645681	LOW_EXPR	-0.442614	0.11953	-0.156095	0.326334	-0.000998147	0.0337249	-0.159248	-0.135107	-0.0629231	-0.417512	0.497644	-0.371693	-1.45805	0.0600865	0.0911329	0.126289	-0.626698	-0.372564	-0.622345	0.0473897	0.264247	-0.588763	LOW_EXPR
81	PTPN9	-0.202296	0.0911543	0.079104	0.020725	0.0426846	0.0849171	0.0543182	0.0834253	-0.0835689	-0.0378641	0.213508	-0.0183991	0.0420038	0.0462618	0.157406	-0.0123148	-0.0929497	-0.241101	0.038325	-0.0927654	-0.020301	-0.0564563	0.0486971	-0.297593	-0.112033	0.0539077	0.0545078	0.104857	-0.0145873	0.148787	0.053654	-0.236389	-0.074168	0.157763	0.00668696	-0.0162643	-0.0200748	0.0220458	0.0637103	-0.000518805	-0.167128	-0.0023738	0.0301952	0.0435108	-0.0396789	-0.134789
82	LRRC16B	-0.196664	0.0585689	0.0208511	-0.127857	-0.0381167	-0.222824	0.156388	0.083995	LOW_EXPR	LOW_EXPR	LOW_EXPR	0.543223	0.187978	0.0472242	0.566028	-0.151222	0.190048	-0.183374	0.225843	0.199161	-0.0214262	-0.0260781	-0.19254	-0.306591	0.192998	-0.141455	-0.153167	-0.179342	-0.290405	-0.0344636	0.0216417	-0.0575931	0.0546035	LOW_EXPR	-0.00546105	0.163458	-0.0244651	-0.0412214	0.0688514	0.0650198	-0.365322	0.190199	-0.194147	0.125104	-0.0637987	0.0697201
83	CYB561	-0.192065	-0.124921	0.00725519	0.14065	-0.0433604	-0.167941	0.139535	0.015652	-0.206647	0.0147796	0.0174526	0.295228	-0.162941	0.215759	-0.244196	0.0753093	-0.00911091	-0.0463394	-0.0533998	-0.18623	-0.00322011	-0.0302452	-0.10807	-0.309791	0.337474	-0.079121	0.086381	-0.0792166	-0.0608222	0.113568	0.0656302	-0.290623	-0.125855	-0.0880256	0.0415543	0.243123	0.062173	0.00857605	0.277896	-0.0170712	-0.0336494	0.0214854	-0.112536	-0.0608683	-0.0842792	-0.224078
84	PMEPA1	-0.184148	0.0533576	0.0154431	0.00898103	0.0221435	-0.0449307	0.0143433	-0.444518	-0.120877	0.0301419	-0.186138	-0.189233	-0.505921	-0.406174	0.367901	-0.231219	-0.0494163	-0.403382	-0.120942	-0.0827916	0.0629254	0.0128918	-0.132445	-0.331051	0.0875101	-0.0440615	0.126713	0.00349106	-0.00141921	0.0393646	0.0291273	0.213122	0.0437561	-0.214442	-0.138436	-0.532325	-0.0575865	0.315913	0.160046	-0.118518	-0.162968	-0.0126453	-0.0765765	0.00272725	0.0800364	-0.45105
85	ADCY1	-0.181466	0.141252	-0.0973358	-0.0680239	-0.0728426	-0.167215	-0.123451	-0.108745	-0.174185	0.0543815	-0.330011	-0.0623749	-0.171715	-0.033517	0.158895	0.136491	0.119667	-0.0879262	-0.132611	0.0863774	LOW_EXPR	-0.348232	LOW_EXPR	-0.329144	0.418148	-0.128674	-0.144094	0.0622607	-0.396417	0.0121566	-0.129111	-0.464804	0.122712	-0.20785	-0.133284	-0.532221	-0.0951049	0.125514	0.309843	-0.134239	-0.251631	-0.177732	-0.0301445	0.0381074	-0.354147	LOW_EXPR
86	RALGPS2	-0.176513	-0.186766	0.0936113	-0.0154179	0.0819876	-0.0184236	0.0460827	0.117934	0.0763818	-0.142291	-0.0417343	-0.250784	0.187837	-0.165055	0.0851135	0.0931263	0.0570868	-0.245493	0.343411	-0.148466	-0.0331915	-0.298309	0.294292	-0.358104	0.117537	0.0337872	0.0641243	-0.0968559	0.272299	0.0144021	-0.0315875	-0.0638567	-0.242302	0.066516	-0.0840439	0.5017	-0.160022	0.147645	-0.0814698	0.24915	-0.233311	0.294611	-0.120767	-0.0783408	-0.329909	0.034406
87	C4A	-0.172958	-0.0407986	0.167321	0.204551	0.429765	0.60694	0.157807	0.295603	0.132116	0.29531	LOW_EXPR	0.394779	-0.621158	0.141348	-0.0158895	-0.419312	-0.5143	-1.19474	0.0123196	0.0900772	-0.173069	-0.378136	LOW_EXPR	-0.327116	-0.0272172	0.0239472	0.203044	0.379889	-0.172503	-0.297598	0.551791	0.0855656	0.133979	0.0690041	0.135905	-0.35965	0.302006	-0.116819	-0.264684	-0.101589	0.0423653	0.221291	0.0704357	0.0638714	-0.42658	0.407614
88	CPAMD8	-0.171915	0.000532545	0.475252	0.242852	0.279006	-0.0767152	0.118974	0.197712	-0.103898	-1.32521	0.145928	0.300272	-0.0635571	-0.0411482	0.241273	-0.0825542	0.114025	-0.0149107	-0.184507	-0.0944013	-0.271961	-0.895738	-0.20109	-0.326821	-0.221867	0.281053	0.33466	0.28407	-0.26406	0.143162	0.152217	-0.0792767	-1.37163	0.265369	0.259383	-0.37924	-0.205369	0.233653	-0.0991305	-0.182624	-0.130579	-0.235258	0.0559578	0.0306851	-1.21912	-0.152714
89	GMCL1	-0.170367	-0.00952028	0.0293181	0.111252	0.0287198	0.0242964	0.038519	0.200831	-0.0141772	0.0536789	0.022104	0.0142692	0.0469826	-0.0888925	0.168749	-0.00634601	-0.00677066	-0.122441	0.306182	0.0611251	0.0222121	0.0626589	0.162621	-0.297196	0.0437172	-0.0190111	0.0121115	-0.0436397	-0.0335525	0.0486016	0.246177	-0.0415182	0.074181	0.029678	0.120155	0.0847238	0.00127815	0.0409102	-0.114274	0.0610338	-0.0276486	0.211612	0.031044	-0.0490259	0.0133741	0.0266868
90	REEP1	-0.163669	0.14069	0.0664143	0.0362674	0.110092	0.102808	0.122151	0.116258	-0.0916644	0.0676065	-0.337143	0.0248926	-0.311912	0.174959	0.468718	0.0745323	0.379094	0.0883623	-0.114258	0.119595	0.294227	-0.741524	LOW_EXPR	-0.285692	0.141462	-0.00620245	-0.0170403	0.00190461	0.0576894	0.26956	0.00483237	-0.227636	0.00368555	-0.0106577	-0.0679344	-1.47965	0.142094	0.289597	-0.303176	0.442774	0.454294	0.0398995	0.277442	0.313014	-0.829028	LOW_EXPR
91	NOTCH1	-0.151686	0.0325039	0.013261	0.215514	-0.00783565	-0.0654967	-0.0335688	0.0904903	-0.0256282	-0.0763592	0.12295	-0.00369431	0.0547239	-0.0200497	0.400797	0.0465128	0.115969	-0.181925	0.023312	-0.057768	-0.004506	0.0847268	0.106084	-0.322243	-0.00576664	0.0635106	0.00538268	0.014306	0.00640806	0.0538558	-0.0797839	0.14575	-0.0996599	0.108162	-0.0424018	-0.00154592	0.0847206	0.138389	0.0574772	-0.318766	-0.189139	-0.0700095	0.117162	-0.08214	0.124811	0.136368
92	UBBP4	-0.145737	-0.107891	-0.0394251	0.0368652	0.0998203	-0.120455	0.108378	-0.0556128	0.0907366	0.0147513	0.00803128	-0.333823	-0.0352079	0.0619135	-0.149573	0.104115	-0.0793923	0.0985388	-0.0943476	-0.141537	0.162785	-0.00853574	0.256852	-0.267446	-0.321773	0.0578533	-0.0262153	0.0301251	-0.0919112	0.0148716	0.0377759	0.228286	-0.0131674	-0.00645186	-0.0256636	-0.112806	-0.0578741	-0.0657162	0.0222568	-0.0415218	0.0608745	-0.142137	-0.0712506	0.146328	-0.0610075	0.204995
93	TMEM255A	-0.138437	-0.0706329	-0.132583	0.285966	0.225508	-0.0792143	0.0230904	0.385196	-0.800639	0.135415	0.145524	-0.0554387	0.196591	-0.0965587	LOW_EXPR	0.237019	-0.468653	LOW_EXPR	0.310658	0.408938	-0.0921889	-0.699771	LOW_EXPR	-0.421077	0.260565	-0.314649	0.2381	0.0978638	0.0988598	0.0864528	0.203472	-0.816735	0.0903582	0.0389989	-0.0443538	0.0711323	0.0959738	LOW_EXPR	0.190929	-0.0452483	LOW_EXPR	0.32722	0.505742	-0.0787937	-0.603289	LOW_EXPR
94	FST	-0.129053	0.0524136	LOW_EXPR	LOW_EXPR	0.0346506	0.0406725	0.319234	0.118136	-0.774518	-0.0599686	0.0164298	0.171145	-0.0308275	0.236024	0.17701	-0.31127	-0.355626	-0.306935	LOW_EXPR	0.371164	0.064282	-0.0754455	LOW_EXPR	-0.351225	-0.203033	-0.14006	LOW_EXPR	0.0958384	0.0195719	-0.491272	0.16335	0.180938	-0.222908	0.0742546	-0.228298	0.213139	-0.0247986	0.127002	0.01085	-0.203617	-0.411767	-0.146933	0.334844	0.17232	-0.186348	LOW_EXPR
95	SYNM	-0.125422	0.0174021	0.188177	0.296875	0.102468	0.0549702	-0.00673202	0.139659	0.0228472	-0.0729053	-0.18102	-0.578268	-0.616557	-0.0750762	0.118499	0.186879	-0.189345	-0.368908	0.363429	0.0579622	0.305055	-0.103885	0.007604	-0.272578	0.0197974	0.0307567	0.145447	0.102957	0.0719798	0.0961091	0.0666156	-0.0662495	0.00563204	-0.101353	-0.342756	-1.98948	-0.0896611	0.0107374	0.0127807	-0.10257	-0.618963	0.292706	0.0938534	0.293948	-0.560893	-0.394202
96	SRRM3	-0.122159	0.579522	0.0923368	-0.152765	-0.134429	-0.434194	0.0109152	-0.0538345	-0.147104	-0.21151	0.391804	-0.620942	-0.158438	-0.0423614	LOW_EXPR	-0.105641	0.196715	-0.141682	0.0476487	-0.149489	-0.0695047	0.322255	LOW_EXPR	-0.313546	0.382436	0.162582	-0.0618067	-0.131016	-0.258567	-0.19192	0.00221352	0.165934	-0.286824	0.287574	-0.324778	-0.402346	0.0140623	LOW_EXPR	-0.155179	0.204886	-0.276168	0.263058	-0.0860004	-0.0644715	0.209389	LOW_EXPR
97	NXPH3	-0.110764	-0.15785	-0.278756	-0.211733	-0.0724216	-0.121504	0.0998294	-0.15114	-0.151848	-0.225777	0.0367885	0.284895	-0.0546799	-0.0890532	LOW_EXPR	0.366708	-0.0416592	LOW_EXPR	-0.503198	0.111394	0.107477	-0.718995	LOW_EXPR	-0.301845	-0.0839377	-0.0131232	-0.0910918	-0.00857853	0.025586	0.281716	0.146534	-0.486841	-0.13433	0.0440389	-0.182583	-0.825246	-0.0147754	LOW_EXPR	0.117944	-0.244286	LOW_EXPR	-0.506909	0.12727	0.0198074	-0.596946	LOW_EXPR
98	STRA6	-0.103473	LOW_EXPR	LOW_EXPR	LOW_EXPR	LOW_EXPR	0.197391	LOW_EXPR	LOW_EXPR	LOW_EXPR	LOW_EXPR	LOW_EXPR	LOW_EXPR	LOW_EXPR	LOW_EXPR	LOW_EXPR	0.137459	-0.437047	LOW_EXPR	LOW_EXPR	LOW_EXPR	0.0110025	LOW_EXPR	LOW_EXPR	-0.305259	0.555751	LOW_EXPR	LOW_EXPR	LOW_EXPR	-0.108596	0.397992	LOW_EXPR	LOW_EXPR	LOW_EXPR	LOW_EXPR	LOW_EXPR	0.150863	LOW_EXPR	LOW_EXPR	0.125725	-0.117029	LOW_EXPR	LOW_EXPR	-0.978071	-0.167693	LOW_EXPR	LOW_EXPR
99	ISLR2	-0.092813	LOW_EXPR	-0.0238905	-0.243534	0.283924	-0.229335	-0.286718	-0.0969637	-0.00743019	LOW_EXPR	-0.0771116	LOW_EXPR	0.334591	0.261325	LOW_EXPR	LOW_EXPR	-0.698488	LOW_EXPR	0.209293	-0.144666	LOW_EXPR	-0.141034	LOW_EXPR	-0.294992	0.10572	0.241053	-0.20098	0.133899	-0.22702	0.0758375	0.264362	-0.296602	LOW_EXPR	-0.0414828	-0.0917166	-0.0275076	-0.0388762	LOW_EXPR	0.432568	-0.116406	LOW_EXPR	0.181197	-0.187486	LOW_EXPR	-0.18107	LOW_EXPR
100	PDGFRA	-0.0873603	0.247563	0.175243	0.198572	0.205848	-0.119166	0.35228	-0.0932478	-0.068462	-0.0894438	0.125294	0.182249	-0.0421633	0.0895177	0.404619	0.264684	-0.456315	-0.0355072	0.614989	0.331792	0.0184677	-0.0937449	LOW_EXPR	-0.301606	-0.0229075	0.0917129	0.393644	-0.0314135	-0.303448	0.00336954	0.283194	-0.283541	-0.0706096	0.128037	0.178059	0.10468	0.117425	0.362012	0.289537	-0.308401	0.162555	0.397731	0.308464	-0.132344	-0.160231	LOW_EXPR
101	ASB8	-0.0831428	0.0559225	-0.0321697	0.0320663	-0.0332067	-0.0171582	0.0345845	0.0202782	-0.130874	0.0778069	0.0625592	0.358568	0.0947737	0.188423	-0.0649623	0.0686618	0.0162082	-0.0545006	0.107868	0.0928535	0.0503799	0.00345108	0.186963	-0.271106	0.1071	-0.00702346	0.078577	0.0441503	0.00364764	-0.0476466	0.0413025	-0.0555069	-0.0522735	0.142912	0.105181	0.0990006	0.0928613	-0.00398454	0.0370103	0.114839	-0.0160955	0.128263	0.0761905	0.0134218	-0.0266231	0.101289
102	CYP4A22	-0.0107065	LOW_EXPR	LOW_EXPR	LOW_EXPR	-0.207991	LOW_EXPR	-0.354791	0.118571	LOW_EXPR	LOW_EXPR	LOW_EXPR	-0.0490281	LOW_EXPR	LOW_EXPR	-0.140681	LOW_EXPR	LOW_EXPR	LOW_EXPR	LOW_EXPR	LOW_EXPR	LOW_EXPR	-0.116623	LOW_EXPR	-0.315474	LOW_EXPR	0.16112	LOW_EXPR	-0.272065	-0.500102	0.0452953	0.0159279	LOW_EXPR	LOW_EXPR	LOW_EXPR	0.0975641	LOW_EXPR	LOW_EXPR	-0.0284914	LOW_EXPR	LOW_EXPR	LOW_EXPR	LOW_EXPR	LOW_EXPR	LOW_EXPR	0.192682	LOW_EXPR
103	CD8B	0.158013	-0.0673605	-0.0654939	LOW_EXPR	LOW_EXPR	LOW_EXPR	-0.320897	0.287144	LOW_EXPR	-0.277467	LOW_EXPR	-0.0727461	0.620919	-0.132483	0.464278	0.312603	-0.222628	LOW_EXPR	0.0353798	-0.0802004	0.0313412	-0.252748	0.106694	0.361249	-0.204299	-0.00813738	0.190987	LOW_EXPR	-0.011174	-0.192755	-0.0328323	LOW_EXPR	-0.316309	LOW_EXPR	-0.0230402	0.306141	0.0732057	0.280864	0.342245	-0.647374	-0.158734	-0.120512	-0.253084	-0.0528564	-0.148896	-0.0115595
104	KCNRG	0.171787	0.478457	-0.0224875	0.0969662	-0.210815	-0.185126	-0.271126	-0.0190936	-0.0520486	-0.201163	0.296405	0.357475	0.373991	0.160639	-0.140504	0.102945	-0.152542	-0.253576	-0.0505379	-0.261757	0.0019267	-0.0959757	0.254126	-0.492957	-0.275653	-0.123531	-0.0235589	-0.0946257	-0.278725	-0.389639	-0.340584	0.0461665	-0.0743101	0.139521	0.442351	0.197672	0.144625	0.120857	0.340754	-0.348846	-0.159737	-0.0227321	-0.0507264	0.0288212	-0.0542332	0.255424
105	MOV10L1	0.193015	0.26008	0.267735	-0.0478207	0.249596	0.028552	0.401717	0.129583	LOW_EXPR	-0.313636	LOW_EXPR	LOW_EXPR	-0.408471	0.0773718	LOW_EXPR	LOW_EXPR	-0.172515	LOW_EXPR	LOW_EXPR	LOW_EXPR	LOW_EXPR	LOW_EXPR	LOW_EXPR	0.297526	0.217551	0.207454	0.0140409	0.156258	0.166826	0.306829	0.180851	LOW_EXPR	-0.200928	LOW_EXPR	0.0314422	0.149006	-0.03798	LOW_EXPR	LOW_EXPR	-0.27609	LOW_EXPR	LOW_EXPR	LOW_EXPR	-0.151328	0.187877	LOW_EXPR
106	SULF1	0.193971	0.192706	0.433246	0.325771	0.545683	0.465691	0.0650436	0.646147	-0.0435832	-0.0867222	0.354135	-0.462988	-0.730187	-0.141033	0.439301	0.2893	-0.247285	-0.156232	0.153924	-0.308604	-0.11589	-0.592845	LOW_EXPR	0.272008	0.117572	0.362555	0.51998	0.471708	0.217762	0.0666612	0.69845	-0.2201	-0.261365	0.247886	-0.0915701	-0.856813	-0.212526	0.319859	-0.0492851	-0.050698	0.129533	-0.0200445	-0.0972613	-0.0465847	-0.452957	LOW_EXPR
107	TF	0.201366	0.0400597	-0.0674347	-0.291485	0.421443	-0.0430919	0.154001	-0.0324308	-0.319591	0.0627289	-0.122309	-0.301725	0.149859	-0.129588	-0.338464	0.0395813	-0.353873	-0.125184	0.215877	-0.368878	0.336273	0.991651	0.121316	0.351801	-0.306884	-0.469489	-0.127003	0.554334	-0.500509	-0.249962	0.0924742	0.169521	-0.0617251	0.0916027	0.0322519	-0.106237	-0.25484	-0.290733	0.113822	-0.469215	-0.182155	0.507387	-0.412837	0.213491	0.796642	0.222166
108	CD3E	0.241753	0.173665	0.336658	LOW_EXPR	LOW_EXPR	0.0810677	0.182364	0.530762	0.0193072	-0.125898	LOW_EXPR	-0.164102	0.490417	0.252199	-0.043184	0.208677	-0.358482	-0.539961	-0.128418	-0.0158178	0.00404397	-0.0788284	-0.0235179	0.274089	-0.135112	0.381262	0.0602285	0.448737	0.555627	-0.431467	1.03077	-0.302291	-0.183147	-0.00357856	0.0755609	0.200439	0.0623141	0.0471523	0.0621574	-0.009186	-0.73912	-0.15102	-0.0154731	0.15158	0.0216791	-0.227176
109	C5orf64	0.271731	-0.0434086	-0.272455	-0.137845	-0.022687	-0.218743	0.287621	0.126433	LOW_EXPR	LOW_EXPR	LOW_EXPR	LOW_EXPR	LOW_EXPR	LOW_EXPR	LOW_EXPR	LOW_EXPR	LOW_EXPR	LOW_EXPR	LOW_EXPR	LOW_EXPR	LOW_EXPR	LOW_EXPR	LOW_EXPR	0.291722	0.0497563	0.143074	-0.134445	0.153985	-0.253337	0.00612554	0.126887	LOW_EXPR	LOW_EXPR	LOW_EXPR	LOW_EXPR	LOW_EXPR	-0.0741891	LOW_EXPR	LOW_EXPR	LOW_EXPR	LOW_EXPR	LOW_EXPR	LOW_EXPR	LOW_EXPR	LOW_EXPR	LOW_EXPR
110	FH	0.284008	0.0912324	0.028034	-0.0481981	-0.014082	0.08489	0.00566469	0.07619	-0.121581	0.0728518	0.0299873	0.479083	0.0974145	0.0624733	-0.0589111	0.0815567	-0.0169823	-0.140645	0.0538448	-0.124899	0.0430749	0.103448	0.131667	0.348758	0.051643	0.110176	0.00112097	0.00766593	0.0885923	0.0102327	0.0542557	-0.0178926	0.078063	0.105997	0.0769659	0.191827	0.0376199	-0.137455	-0.0218709	0.0907045	-0.0764795	0.110746	-0.0668703	0.0160663	0.169761	0.118747
111	PGBD5	0.288788	0.0143071	-0.0778222	-0.0197553	-0.0884812	-0.163375	-0.0691699	-0.111891	-0.278345	0.0529268	0.254534	0.0283114	-0.180835	0.0245221	0.0850982	0.140935	0.171482	-0.678513	-0.00425495	-0.491915	-0.346647	0.155835	LOW_EXPR	0.329589	0.156765	-0.0649842	-0.062755	-0.0522449	-0.202324	-0.0980791	0.00717149	-0.287298	0.0621231	0.177331	-0.0716459	-0.555231	0.0279738	0.112359	0.247464	0.0597249	-0.332893	-0.0999592	-0.677048	-0.474676	0.0853147	LOW_EXPR
112	MORN2	0.289779	0.207074	0.00814626	0.292678	0.0356096	0.0285245	0.0613955	-0.011471	0.0124831	0.0790452	0.0861737	0.0905184	-0.0848844	-0.0110405	-0.0483171	-0.00221081	0.0417247	-0.160905	0.0709128	-0.0135476	0.194616	0.03228	-0.00345064	0.345473	0.223541	-0.188053	0.164884	-0.0288765	-0.0258033	-0.0439948	-0.0139283	0.0049419	0.033562	0.137927	0.327176	-0.466033	0.0161361	-0.0589061	0.00563356	0.0959199	-0.0263049	0.0496576	-0.160313	0.0846536	0.0267175	-0.00661317
113	SLC27A6	0.301683	0.400291	-0.121309	LOW_EXPR	LOW_EXPR	0.904547	0.544973	0.505559	-0.202832	LOW_EXPR	LOW_EXPR	0.51008	0.134198	-0.0498872	LOW_EXPR	0.170699	-0.420929	LOW_EXPR	LOW_EXPR	-0.653885	0.0863926	LOW_EXPR	LOW_EXPR	0.386913	-0.0449964	-0.313577	LOW_EXPR	LOW_EXPR	0.941391	0.435883	0.546259	-0.213007	LOW_EXPR	0.191249	-0.158317	0.0696272	0.093744	LOW_EXPR	0.381444	-1.86415	LOW_EXPR	LOW_EXPR	-0.857781	0.0939419	LOW_EXPR	LOW_EXPR
114	DRP2	0.320723	0.0755235	0.0311274	0.255296	-0.112944	-0.155198	-0.138023	-0.308709	LOW_EXPR	0.249774	LOW_EXPR	LOW_EXPR	-0.047803	0.165789	LOW_EXPR	LOW_EXPR	0.757655	LOW_EXPR	LOW_EXPR	0.388745	LOW_EXPR	LOW_EXPR	LOW_EXPR	0.259892	-0.11767	0.152095	0.27864	0.0583929	0.00900839	-0.210432	0.0541391	LOW_EXPR	0.235957	LOW_EXPR	LOW_EXPR	-1.84009	0.137499	LOW_EXPR	LOW_EXPR	0.527019	LOW_EXPR	LOW_EXPR	-0.0335805	LOW_EXPR	-0.707642	LOW_EXPR
115	TXLNG	0.335015	0.241169	0.294989	0.341647	0.168061	0.291146	0.167458	0.300101	0.298417	0.292511	0.678313	0.353423	0.447146	0.423781	0.58282	0.170077	0.226013	0.23981	0.579432	0.59783	0.368118	0.445316	0.601604	0.394642	0.249677	0.221225	0.346467	0.176951	0.439291	0.185128	0.227584	0.356881	0.281007	0.592662	0.175045	0.498633	0.352202	0.524369	0.199864	0.116179	0.206458	0.604613	0.622502	0.402836	0.343288	0.26616
116	CA5B	0.336545	0.0529842	0.291156	0.30956	0.188276	0.179865	0.119469	0.163723	0.133722	0.19798	0.457162	0.136799	0.455515	0.338103	0.389733	0.211016	0.230463	0.0115426	0.37335	0.33996	0.234426	0.238417	0.40937	0.256328	0.237499	0.162238	0.438444	0.320129	0.288726	-0.0271383	0.39419	-0.116941	0.255705	0.423651	0.270087	0.588467	0.220547	0.256387	0.0557655	0.0879423	0.125479	0.408646	0.428389	0.174505	0.336932	0.25015
117	SEZ6L2	0.343381	0.101791	-0.0728758	-0.0982386	0.118799	-0.542932	0.143003	-0.0917038	-0.0570106	0.634622	0.0432596	1.35428	0.338827	-0.00620456	0.231841	0.163687	0.0540695	0.0597179	-0.0117783	0.11562	0.208906	0.428129	LOW_EXPR	0.289926	0.126293	-0.0131696	-0.0784918	0.00703257	-0.302277	0.0169846	0.0800434	0.0549478	0.496862	0.0389506	0.177955	-0.121308	-0.00843641	0.103413	-0.0211933	0.056902	-0.0739275	0.12968	-0.0109311	0.113167	0.362997	LOW_EXPR
118	MCOLN3	0.350135	LOW_EXPR	LOW_EXPR	LOW_EXPR	LOW_EXPR	-0.697269	LOW_EXPR	-0.132121	0.0799197	0.345916	0.388327	0.0175589	-0.342044	-0.240311	LOW_EXPR	0.153803	0.0495003	0.0774501	-0.150091	0.278784	0.0621972	-0.0930158	LOW_EXPR	0.328189	1.26349	0.0315721	LOW_EXPR	LOW_EXPR	0.789971	LOW_EXPR	0.50082	0.316945	0.16706	0.334113	0.0645119	-0.65123	-0.0530021	LOW_EXPR	-0.189956	0.226274	0.0567514	-0.0672994	0.491784	0.254778	-0.0410339	LOW_EXPR
119	CD2	0.356008	0.644148	0.707897	LOW_EXPR	LOW_EXPR	0.0339524	0.0174146	LOW_EXPR	-0.214727	-0.107069	LOW_EXPR	-0.0281709	0.232916	0.331148	0.12659	0.414766	-0.256081	-0.468417	-0.11691	0.155567	-0.0231134	-0.0601044	-0.0204893	0.274769	0.449707	0.572239	LOW_EXPR	LOW_EXPR	0.75454	-0.145224	1.009	-0.0644984	-0.17079	LOW_EXPR	0.155794	0.0906899	0.0404821	0.173948	0.226641	-0.43275	-0.5372	-0.112558	0.182976	0.0688761	0.114127	0.27438
120	PNPLA4	0.367274	0.455814	0.534203	0.250288	0.262782	0.412216	0.392859	0.575126	-0.00952701	0.447424	-0.0234637	1.0892	0.563637	0.132463	0.909067	0.848992	0.456243	0.525293	0.649534	0.403573	0.745881	0.403523	0.5676	0.330934	0.457634	0.523047	0.367755	0.358138	0.563932	0.381555	0.599939	0.103185	0.334065	-0.0627018	0.622996	0.67153	0.163522	0.686913	0.889696	0.478908	0.635871	0.549312	0.46137	0.714723	0.521493	0.477932
121	C17orf97	0.371295	0.323557	-0.111833	0.513328	0.0133359	-0.09475	0.090326	-0.0873624	0.664718	0.363198	0.412542	0.876899	-0.259064	0.281923	0.35677	0.0186245	-0.0811213	-0.096467	1.52265	0.219129	0.253848	0.381825	LOW_EXPR	0.267701	0.186977	0.0461445	0.305261	0.0247846	0.0350966	0.201426	0.0452216	0.288867	0.16716	0.319905	0.293195	0.0692711	0.289948	0.629859	0.242702	0.123402	0.0301672	0.418942	0.134496	0.399044	0.0651727	0.854553
122	EIF2S3	0.398949	0.366189	0.378838	0.340593	0.264734	0.323562	0.355316	0.32851	0.327141	0.401484	0.639737	0.356994	0.268427	0.433955	0.255056	0.271796	0.268824	0.123403	0.498774	0.328795	0.206439	0.28335	0.356197	0.449721	0.354405	0.314261	0.396707	0.363855	0.338994	0.308784	0.361831	0.327671	0.383512	0.588352	0.326566	0.386035	0.489195	0.205686	0.25715	0.190454	0.195405	0.532404	0.381645	0.185269	0.316776	0.294804
123	NCAPH	0.424421	-0.0415211	-0.301011	-0.102415	0.229868	-0.0947138	-0.0566845	LOW_EXPR	LOW_EXPR	0.278326	LOW_EXPR	-0.0315428	0.0985362	LOW_EXPR	LOW_EXPR	-0.197641	LOW_EXPR	LOW_EXPR	0.279566	-0.00680541	-0.0535483	0.0298587	-0.056549	0.491921	0.0422117	-0.323881	-0.00734169	0.0525309	-0.144511	0.361701	0.160875	-0.285986	0.0691213	LOW_EXPR	0.120582	0.15441	0.0717725	LOW_EXPR	-0.0526819	-0.121289	LOW_EXPR	0.776569	-0.0230798	-0.0309263	0.155001	0.0178507
124	PRKX	0.433979	0.339428	0.195275	0.550765	0.158106	0.446878	0.510813	0.643729	-0.0669639	0.212178	0.332103	-0.00852998	0.711012	0.293039	0.329518	0.391728	-0.0204044	-0.129812	0.49356	0.533975	0.656693	0.273282	0.736304	0.282801	0.323679	0.4393	0.5785	0.381325	0.358694	0.40697	0.58984	0.129632	0.228181	0.193341	0.299535	0.849188	0.364492	0.177366	0.397286	0.0454124	-0.074138	0.532809	0.567828	0.650891	0.349118	0.27969
125	TMEM97	0.444054	0.045315	0.106997	0.174221	0.171501	0.212776	-0.0450954	0.0538922	0.0917237	0.275136	0.0303399	1.52095	0.254594	0.220531	-0.162196	-0.029806	-0.353503	0.148925	0.139612	-0.155344	0.243257	0.04929	0.370467	0.373309	0.06047	0.087297	0.364182	0.166256	-0.072666	-0.0286419	0.0272682	0.138409	0.29187	0.00599255	0.340994	0.487056	0.220462	-0.265791	-0.488637	-0.228202	0.118934	0.203768	-0.418474	0.155627	0.0552618	0.250253
126	GPR64	0.44934	LOW_EXPR	LOW_EXPR	LOW_EXPR	LOW_EXPR	0.0839983	-3.24051e-05	LOW_EXPR	-0.016282	0.478172	LOW_EXPR	0.3805	0.373369	0.0829545	-0.358476	0.272339	0.1121	-0.266748	0.222597	-0.0122402	0.235822	0.354223	LOW_EXPR	0.430946	LOW_EXPR	LOW_EXPR	LOW_EXPR	LOW_EXPR	0.0684385	-0.267587	LOW_EXPR	-0.0783949	0.498947	LOW_EXPR	0.434048	0.467076	0.0479879	-0.678408	0.24389	0.0316554	-0.000692892	0.411265	0.0507452	0.395547	0.274338	LOW_EXPR
127	GIPR	0.450493	0.445622	-0.258502	-0.508034	0.00275756	0.339334	0.34342	-0.32699	-0.361695	LOW_EXPR	LOW_EXPR	0.250495	0.0548436	LOW_EXPR	0.308045	0.0378496	0.0767957	-0.228121	-0.27463	0.131711	-0.0249538	0.684975	-0.0118169	0.405052	0.272416	-0.398795	-0.856989	-0.3733	-0.218783	-0.22833	-0.428489	-0.338911	-0.142489	LOW_EXPR	0.245248	-0.167869	-0.139425	0.25489	-0.494444	0.190503	-0.221911	0.0250561	0.104887	-0.137789	0.546304	-0.330049
128	IGSF10	0.468689	0.327746	LOW_EXPR	LOW_EXPR	LOW_EXPR	-0.286664	0.133976	LOW_EXPR	-0.669551	-0.0566108	LOW_EXPR	0.15311	0.326573	0.481765	LOW_EXPR	-0.0646028	0.242083	LOW_EXPR	0.294035	0.114367	0.112604	0.450586	LOW_EXPR	0.278856	0.168563	0.249207	LOW_EXPR	-0.0960887	-0.254754	-0.285272	0.512241	-0.427735	-0.462146	LOW_EXPR	-0.0117982	0.632219	0.0448159	0.48854	-0.0430311	0.00302842	-0.0996767	0.283246	0.736082	0.322526	0.436078	LOW_EXPR
129	GLYAT	0.46997	LOW_EXPR	LOW_EXPR	LOW_EXPR	LOW_EXPR	LOW_EXPR	LOW_EXPR	LOW_EXPR	LOW_EXPR	LOW_EXPR	LOW_EXPR	LOW_EXPR	LOW_EXPR	LOW_EXPR	0.124203	LOW_EXPR	LOW_EXPR	LOW_EXPR	LOW_EXPR	LOW_EXPR	LOW_EXPR	0.577406	LOW_EXPR	0.39056	LOW_EXPR	LOW_EXPR	LOW_EXPR	LOW_EXPR	LOW_EXPR	LOW_EXPR	LOW_EXPR	LOW_EXPR	LOW_EXPR	LOW_EXPR	LOW_EXPR	LOW_EXPR	LOW_EXPR	-0.0733793	LOW_EXPR	LOW_EXPR	LOW_EXPR	LOW_EXPR	LOW_EXPR	LOW_EXPR	0.377017	LOW_EXPR
130	SNRPG	0.487513	-0.0359767	0.0195718	0.0633228	-0.0573159	0.144952	0.0491248	0.175975	-0.0471879	-0.0303493	0.221697	0.123472	0.061149	-0.00394727	-0.0272536	0.0191627	-0.0628964	-0.0188034	-0.108013	-0.0140927	0.0344445	0.0792644	0.134291	0.334147	-0.00165765	0.0741822	0.0813231	0.00529913	0.267865	-0.0790989	0.161583	0.0749684	0.0867268	0.178296	0.149858	0.0463571	-0.00944803	0.104178	0.0638006	-0.153963	0.0312161	0.0141375	-0.00833068	-0.00784575	0.139501	0.266911
131	OFD1	0.499768	0.192044	0.260939	0.190633	0.021373	0.05449	0.214297	0.0101435	0.0503098	0.356371	0.236236	0.132724	0.487502	0.185834	0.441093	0.0906398	0.336936	0.062681	0.06506	0.284796	0.137561	0.0589662	0.370126	0.412158	0.250227	0.283069	0.225961	0.151803	0.00111203	0.18181	0.189852	0.221647	0.314539	0.0860834	0.20594	0.141514	0.294669	0.441179	-0.0793751	0.348687	0.0857381	0.138381	0.309584	0.237216	0.0841206	0.102748
132	RPS4X	0.527019	0.593512	0.207357	0.390336	0.162183	0.373957	0.295205	0.143986	0.206558	0.579334	0.300389	0.513882	0.642376	0.620505	0.670475	0.485902	0.450128	0.508275	0.710754	0.535511	0.605287	0.393462	0.508175	0.5564	0.588761	0.203962	0.446774	0.255027	0.297981	0.233644	0.207466	0.29472	0.534323	0.258222	0.549688	0.579463	0.716711	0.606012	0.4876	0.497614	0.611584	0.696157	0.555873	0.72021	0.39862	0.400935
133	DSC3	0.527404	LOW_EXPR	LOW_EXPR	LOW_EXPR	LOW_EXPR	LOW_EXPR	LOW_EXPR	LOW_EXPR	LOW_EXPR	-0.101621	LOW_EXPR	LOW_EXPR	0.243867	LOW_EXPR	LOW_EXPR	0.801086	LOW_EXPR	LOW_EXPR	LOW_EXPR	0.0833481	0.0956095	LOW_EXPR	LOW_EXPR	0.33789	LOW_EXPR	LOW_EXPR	LOW_EXPR	LOW_EXPR	LOW_EXPR	LOW_EXPR	LOW_EXPR	-0.100598	-0.566414	LOW_EXPR	-0.0601134	-0.38057	0.290943	LOW_EXPR	0.676166	LOW_EXPR	LOW_EXPR	LOW_EXPR	0.072897	0.00371925	LOW_EXPR	LOW_EXPR
134	ASMT	0.540263	LOW_EXPR	LOW_EXPR	1.17434	LOW_EXPR	-0.193103	0.290037	LOW_EXPR	LOW_EXPR	LOW_EXPR	LOW_EXPR	0.503764	0.440938	0.806606	LOW_EXPR	-0.250164	0.103334	LOW_EXPR	0.712227	0.614764	LOW_EXPR	0.409469	LOW_EXPR	0.310092	0.260243	0.0939126	0.895139	0.124022	0.035271	0.170328	0.227148	LOW_EXPR	0.143417	LOW_EXPR	0.542084	0.567224	0.753229	-0.659621	0.14992	0.248988	LOW_EXPR	0.437945	0.434791	LOW_EXPR	0.368953	0.410103
135	DDX3X	0.553446	0.395465	0.372314	0.547309	0.359367	0.449234	0.417681	0.458329	0.447972	0.433058	0.663482	0.402585	0.46201	0.473836	0.574197	0.67772	0.636786	0.267773	0.652659	0.457119	0.312394	0.44101	0.385615	0.540237	0.397965	0.394414	0.541507	0.39081	0.408151	0.532266	0.393967	0.365324	0.401889	0.445582	0.313472	0.396349	0.389571	0.51199	0.582346	0.597396	0.458062	0.532212	0.506178	0.223811	0.368066	0.236049
136	EIF1AX	0.586451	0.400099	0.323714	0.373097	0.132138	0.374892	0.2967	0.322855	0.415384	0.460887	0.627556	0.409712	0.575849	0.378072	0.69575	0.460521	0.0631424	0.488911	0.801945	0.561465	0.508506	0.509075	0.853976	0.577078	0.198517	0.246962	0.412543	0.0975847	0.338565	0.222107	0.35426	0.355499	0.529465	0.650151	0.452981	0.506257	0.441969	0.618739	0.497003	0.19157	0.563517	0.835942	0.578122	0.531994	0.54388	0.64861
137	ZFX	0.587388	0.647599	0.725428	0.579142	0.663901	0.732032	0.563667	0.72836	0.651729	0.700696	0.739145	0.655316	0.601909	0.589801	0.770617	0.654395	0.648885	0.476222	0.757444	0.669223	0.605419	0.494992	0.693373	0.586634	0.775617	0.526299	0.65406	0.679716	0.724852	0.670481	0.714514	0.621249	0.629342	0.790662	0.622456	0.666803	0.603602	0.766458	0.627027	0.443249	0.407677	0.892822	0.76764	0.597611	0.491272	0.60292
138	ZRSR2	0.634741	0.366173	0.331766	0.456493	0.12255	0.120656	0.242443	0.379709	0.341736	0.555726	0.496978	0.334907	0.417091	0.47726	0.596324	0.488796	0.553601	0.412964	0.573319	0.594662	0.557029	0.296235	0.433765	0.428703	0.461155	0.325218	0.398333	0.241535	0.241591	0.151952	0.160666	0.313143	0.517971	0.506603	0.323886	0.580737	0.51092	0.643471	0.564582	0.467187	0.487388	0.465761	0.531907	0.484082	0.333215	0.426908
139	KDM6A	0.64547	0.675686	0.633519	0.514447	0.533887	0.591704	0.486481	0.664298	0.592806	0.637461	0.882434	0.521434	0.708783	0.823584	0.917417	0.676415	0.749723	0.588508	0.888421	0.658335	0.678402	0.588271	0.753142	0.578645	0.573596	0.534934	0.546263	0.558363	0.552792	0.436884	0.514076	0.601716	0.593608	0.885807	0.630581	0.69919	0.764476	0.924747	0.618268	0.711138	0.636572	0.847867	0.614812	0.61932	0.598063	0.572791
140	CD3G	0.652663	0.290727	LOW_EXPR	LOW_EXPR	LOW_EXPR	LOW_EXPR	LOW_EXPR	LOW_EXPR	LOW_EXPR	LOW_EXPR	LOW_EXPR	0.00674844	0.183404	LOW_EXPR	LOW_EXPR	LOW_EXPR	LOW_EXPR	LOW_EXPR	0.0181752	LOW_EXPR	0.0268526	-0.148408	0.257146	0.257764	0.356516	LOW_EXPR	LOW_EXPR	LOW_EXPR	LOW_EXPR	LOW_EXPR	LOW_EXPR	LOW_EXPR	-0.389053	LOW_EXPR	0.133225	0.107257	LOW_EXPR	0.435307	0.18641	LOW_EXPR	LOW_EXPR	-0.0236635	-0.136976	-0.218325	-0.024916	-0.122213
141	SPRR3	0.664022	0.657861	0.300058	-0.568839	-0.0641417	-1.53505	0.0860051	-0.80464	0.340883	0.264971	0.0578379	-0.190717	0.687751	-0.0802051	-0.0251727	0.330018	-0.222115	0.0625119	0.0996622	-0.210919	-0.0162064	0.513337	-0.0132779	0.681501	0.274907	0.539898	0.0971198	-0.195049	-0.649307	-0.68604	-0.596216	0.210001	0.11581	0.174256	-0.0985461	0.39304	0.146243	-0.0383519	0.335776	-0.277926	0.321288	0.40566	0.155112	-0.147252	0.358663	0.0792673
142	TMEM125	0.668567	-0.213872	-0.0894674	-0.0775954	0.163533	0.0388304	0.452045	0.160582	LOW_EXPR	LOW_EXPR	LOW_EXPR	0.877914	-0.490355	LOW_EXPR	0.250625	-0.485159	0.059531	-0.0757822	0.0907284	0.0876088	-0.0265255	LOW_EXPR	LOW_EXPR	0.290307	-0.122577	-0.484779	-0.217205	0.122137	-0.0421428	-0.278063	0.0874987	0.546441	LOW_EXPR	LOW_EXPR	0.131077	0.0501099	0.461704	0.120788	0.301657	0.0642028	-0.0481025	0.328172	-0.0824294	-0.0568172	LOW_EXPR	LOW_EXPR
143	GYG2	0.720894	0.852152	0.336486	0.338694	-0.197665	0.255224	0.104927	0.395733	-0.50525	0.407562	LOW_EXPR	0.757206	0.572355	0.0111031	0.993916	-0.163462	0.0162743	0.247416	0.546319	0.769848	0.0961935	1.36496	LOW_EXPR	0.674709	0.838012	0.13517	0.19949	-0.176423	-0.0205333	0.185969	0.320741	0.0272412	0.48586	0.768091	0.65254	1.041	0.200368	0.902442	0.126562	0.063927	0.285408	0.347414	0.740814	0.0707905	1.35214	LOW_EXPR
144	CPZ	0.726215	LOW_EXPR	LOW_EXPR	LOW_EXPR	LOW_EXPR	LOW_EXPR	LOW_EXPR	LOW_EXPR	LOW_EXPR	LOW_EXPR	LOW_EXPR	-0.890316	LOW_EXPR	LOW_EXPR	LOW_EXPR	LOW_EXPR	LOW_EXPR	LOW_EXPR	LOW_EXPR	LOW_EXPR	-0.272602	LOW_EXPR	LOW_EXPR	0.561083	LOW_EXPR	LOW_EXPR	LOW_EXPR	LOW_EXPR	LOW_EXPR	LOW_EXPR	LOW_EXPR	LOW_EXPR	LOW_EXPR	LOW_EXPR	-0.427772	-0.732962	LOW_EXPR	LOW_EXPR	LOW_EXPR	-0.265098	LOW_EXPR	LOW_EXPR	0.205426	-0.203261	-0.205835	LOW_EXPR
145	MEGF11	0.812852	-0.181672	0.0430366	0.0140924	0.229995	-0.00508704	0.158616	0.0842705	LOW_EXPR	LOW_EXPR	LOW_EXPR	LOW_EXPR	LOW_EXPR	LOW_EXPR	LOW_EXPR	LOW_EXPR	-0.380634	LOW_EXPR	LOW_EXPR	0.0530601	LOW_EXPR	LOW_EXPR	LOW_EXPR	0.370943	0.090433	0.107336	-0.0184627	-0.0549303	-0.0727453	0.420868	0.0460542	LOW_EXPR	LOW_EXPR	LOW_EXPR	-0.192251	LOW_EXPR	LOW_EXPR	LOW_EXPR	LOW_EXPR	-0.470529	LOW_EXPR	-0.0726942	0.0342219	LOW_EXPR	LOW_EXPR	LOW_EXPR
146	PRSS16	0.915038	LOW_EXPR	LOW_EXPR	0.864569	-0.129494	-0.0766036	LOW_EXPR	LOW_EXPR	LOW_EXPR	0.802562	LOW_EXPR	0.767737	0.136216	LOW_EXPR	LOW_EXPR	0.320789	0.288008	-0.105222	0.494711	0.0774073	0.235481	LOW_EXPR	LOW_EXPR	0.586335	LOW_EXPR	LOW_EXPR	0.728073	0.0679229	-0.51846	0.402864	0.105939	LOW_EXPR	0.991554	LOW_EXPR	0.150324	0.14477	LOW_EXPR	LOW_EXPR	0.177493	0.318368	0.153553	0.466137	0.206237	0.160241	LOW_EXPR	LOW_EXPR
147	KRT4	0.99435	0.294818	0.689703	-0.256586	-0.297094	-1.48112	-0.838343	-0.402464	0.542796	0.277761	-0.107902	0.435229	0.449098	-0.603008	-0.282803	0.105781	0.0274293	0.420452	-0.150226	0.134597	-0.0753822	0.652959	0.0677724	0.562061	0.0212119	0.78003	0.0734506	0.435308	0.240315	-0.106924	-0.497931	0.719552	0.153237	0.209929	0.382197	0.554681	-0.0816647	0.00856541	0.146934	-0.137458	0.350039	0.449344	0.14931	0.114772	0.10909	0.0168541
148	MAP7D2	1.39923	0.602164	0.0573988	0.0162889	0.0902707	-0.482591	0.146749	0.106306	0.233477	LOW_EXPR	1.60151	1.17742	0.0680068	0.133684	LOW_EXPR	-0.180428	-0.141413	LOW_EXPR	2.14448	-0.458545	LOW_EXPR	0.913598	LOW_EXPR	1.47909	0.169659	-0.0756552	0.075394	-0.0547011	-0.0305648	0.00100679	-0.0781281	0.385689	LOW_EXPR	1.55959	0.589958	0.0388698	0.107179	LOW_EXPR	-0.491681	-0.0566368	-0.346484	2.21044	-0.655188	-0.00113716	0.735045	LOW_EXPR
149	SP4	1.7169	0.128555	0.0977515	0.17642	0.106131	0.271497	0.155753	0.0958854	0.0494387	-0.0326586	0.160007	0.270841	0.177646	0.0808572	0.188903	0.0108114	0.125524	-0.0051341	0.280839	0.206875	0.0503506	-0.0028186	0.333327	0.432916	0.191293	0.10603	0.0742022	0.113394	0.094386	-0.000930208	0.0300817	-0.074936	-0.0658913	0.113916	0.0861814	0.276965	0.0915305	0.0437517	0.0706358	0.023632	0.0277965	0.405418	0.288421	0.18921	-0.0637071	-0.193541
